# Supplementary material for: The meteorology and chemistry of high nitrogen oxide concentrations in the stable boundary layer at the South Pole
Source: Copernicus journal article supplement (doi:10.5194/acp-18-3755-2018), 2018-03-14
Supplement: Supplementary file 1 [file ANTCI_met_NO_merge_2003.xlsx]

## Sheet: merge
Year	jday	tst	tsp	tmid	WD	WS	Temp_2	Temp_10	Temp_22	delta_T	NO	NO2	NOy
2003	324	0	600	300	29.2	4.41	-40.73	-9999	-39.68	1.05	-9999	-9999	-9999
2003	324	600	1200	900	31	4.34	-40.9	-9999	-39.92	0.98	-9999	-9999	-9999
2003	324	1200	1800	1500	30.7	4.29	-40.93	-9999	-40.24	0.69	-9999	-9999	-9999
2003	324	1800	2400	2100	29.1	4.49	-40.79	-9999	-40.24	0.55	-9999	-9999	-9999
2003	324	2400	3000	2700	26.9	4.42	-40.89	-9999	-40.42	0.47	-9999	-9999	-9999
2003	324	3000	3600	3300	22	4.35	-40.82	-9999	-40.22	0.6	-9999	-9999	-9999
2003	324	3600	4200	3900	22.1111	4.42222	-40.7	-9999	-40.2	0.5	-9999	-9999	-9999
2003	324	4200	4800	4500	24.9998	4.26667	-40.7	-9999	-40.2222	0.477778	-9999	-9999	-9999
2003	324	4800	5400	5100	29.6998	4.41	-40.67	-9999	-40.24	0.43	-9999	-9999	-9999
2003	324	5400	6000	5700	31.3	4.44	-40.79	-9999	-40.22	0.57	-9999	-9999	-9999
2003	324	6000	6600	6300	28.7999	4.33	-40.67	-9999	-40.39	0.28	-9999	-9999	-9999
2003	324	6600	7200	6900	29.8	4.43	-40.64	-9999	-40.4	0.24	-9999	-9999	-9999
2003	324	7200	7800	7500	29.3	4.27	-40.7	-9999	-40.4	0.3	-9999	-9999	-9999
2003	324	7800	8400	8100	31.1	4.33	-40.68	-9999	-40.24	0.44	-9999	-9999	-9999
2003	324	8400	9000	8700	31.8	4.1	-40.7	-9999	-40.34	0.36	-9999	-9999	-9999
2003	324	9000	9600	9300	29.3	3.81	-40.69	-9999	-40.4	0.29	-9999	-9999	-9999
2003	324	9600	10200	9900	29.2	3.98	-40.63	-9999	-40.4	0.23	-9999	-9999	-9999
2003	324	10200	10800	10500	30.8999	4.16	-40.61	-9999	-40.28	0.33	-9999	-9999	-9999
2003	324	10800	11400	11100	34.5	4.28	-40.64	-9999	-40.2	0.44	-9999	-9999	-9999
2003	324	11400	12000	11700	31.6	4.1	-40.6	-9999	-40.36	0.24	-9999	-9999	-9999
2003	324	12000	12600	12300	33.1	4.18	-40.58	-9999	-40.2	0.38	-9999	-9999	-9999
2003	324	12600	13200	12900	35.3	4.15	-40.58	-9999	-40.33	0.25	-9999	-9999	-9999
2003	324	13200	13800	13500	38.1	4.1	-40.64	-9999	-40.28	0.36	-9999	-9999	-9999
2003	324	13800	14400	14100	41.6	4.18	-40.5	-9999	-40.22	0.28	-9999	-9999	-9999
2003	324	14400	15000	14700	41.6	4.07	-40.57	-9999	-40.26	0.31	-9999	-9999	-9999
2003	324	15000	15600	15300	43.9002	3.85	-40.6	-9999	-40.32	0.28	-9999	-9999	-9999
2003	324	15600	16200	15900	45.4	3.55	-40.68	-9999	-40.34	0.34	-9999	-9999	-9999
2003	324	16200	16800	16500	45.1	3.31	-40.74	-9999	-40.47	0.27	-9999	-9999	-9999
2003	324	16800	17400	17100	44.2998	3.48	-40.8	-9999	-40.45	0.35	-9999	-9999	-9999
2003	324	17400	18000	17700	42.2	4.09	-40.73	-9999	-40.3	0.43	-9999	-9999	-9999
2003	324	18000	18600	18300	42	4.54286	-40.6625	-9999	-40.225	0.4375	-9999	-9999	-9999
2003	324	18600	19200	18900	37.5	4.8	-40.6	-9999	-40.2	0.4	-9999	-9999	-9999
2003	324	19200	19800	19500	34.6667	4.8	-40.5857	-9999	-40.2	0.385714	-9999	-9999	-9999
2003	324	19800	20400	20100	34.6	4.85	-40.53	-9999	-40.2	0.33	-9999	-9999	-9999
2003	324	20400	21000	20700	33	4.72857	-40.5	-9999	-40.2	0.3	-9999	-9999	-9999
2003	324	21000	21600	21300	34.8	5.03	-40.5	-9999	-40.18	0.32	-9999	-9999	-9999
2003	324	21600	22200	21900	34.1	4.82	-40.49	-9999	-40.18	0.31	-9999	-9999	-9999
2003	324	22200	22800	22500	34.2	4.76	-40.54	-9999	-40.2	0.34	-9999	-9999	-9999
2003	324	22800	23400	23100	33.1	4.83	-40.6	-9999	-40.2	0.4	-9999	-9999	-9999
2003	324	23400	24000	23700	29.3	5.1	-40.52	-9999	-40.2	0.32	-9999	-9999	-9999
2003	324	24000	24600	24300	28.1667	5.13333	-40.4857	-9999	-40.2	0.285714	-9999	-9999	-9999
2003	324	24600	25200	24900	28.4	5.11	-40.5	-9999	-40.2	0.3	-9999	-9999	-9999
2003	324	25200	25800	25500	30.2	5.13	-40.5	-9999	-40.2	0.3	-9999	-9999	-9999
2003	324	25800	26400	26100	29.6667	5.16667	-40.39	-9999	-40.18	0.21	-9999	-9999	-9999
2003	324	26400	27000	26700	27.1429	5.18571	-40.3	-9999	-40.1143	0.185714	-9999	-9999	-9999
2003	324	27000	27600	27300	27.2	5.11	-40.33	-9999	-40.2	0.13	-9999	-9999	-9999
2003	324	27600	28200	27900	29.1	5.08	-40.33	-9999	-40.2	0.13	-9999	-9999	-9999
2003	324	28200	28800	28500	28.9	4.97	-40.21	-9999	-40.2	0.01	-9999	-9999	-9999
2003	324	28800	29400	29100	29.6	5.09	-40.3	-9999	-40.2	0.1	-9999	-9999	-9999
2003	324	29400	30000	29700	31.2	5.11	-40.44	-9999	-40.32	0.12	-9999	-9999	-9999
2003	324	30000	30600	30300	32.2	5.09	-40.6	-9999	-40.4	0.2	-9999	-9999	-9999
2003	324	30600	31200	30900	31.8	5.2	-40.56	-9999	-40.32	0.24	-9999	-9999	-9999
2003	324	31200	31800	31500	29.4	4.94	-40.36	-9999	-40.2	0.16	-9999	-9999	-9999
2003	324	31800	32400	32100	28.3	4.75	-40.32	-9999	-40.2	0.12	-9999	-9999	-9999
2003	324	32400	33000	32700	25.4	4.7	-40.46	-9999	-40.2	0.26	-9999	-9999	-9999
2003	324	33000	33600	33300	26.5	4.68	-40.5	-9999	-40.2	0.3	-9999	-9999	-9999
2003	324	33600	34200	33900	27	4.68	-40.48	-9999	-40.2	0.28	-9999	-9999	-9999
2003	324	34200	34800	34500	26.8	4.71	-40.48	-9999	-40.2	0.28	-9999	-9999	-9999
2003	324	34800	35400	35100	28.1	4.58	-40.5	-9999	-40.2	0.3	-9999	-9999	-9999
2003	324	35400	36000	35700	25.9	4.69	-40.48	-9999	-40.2	0.28	-9999	-9999	-9999
2003	324	36000	36600	36300	26	4.73	-40.39	-9999	-40.2	0.19	-9999	-9999	-9999
2003	324	36600	37200	36900	25	4.78	-40.43	-9999	-40.2	0.23	-9999	-9999	-9999
2003	324	37200	37800	37500	25.3	4.8	-40.46	-9999	-40.2	0.26	-9999	-9999	-9999
2003	324	37800	38400	38100	26	4.75	-40.4714	-9999	-40.2	0.271429	-9999	-9999	-9999
2003	324	38400	39000	38700	25.3	4.71	-40.45	-9999	-40.2	0.25	-9999	-9999	-9999
2003	324	39000	39600	39300	26.4	4.7	-40.5	-9999	-40.22	0.28	-9999	-9999	-9999
2003	324	39600	40200	39900	25.1	4.52	-40.52	-9999	-40.2	0.32	-9999	-9999	-9999
2003	324	40200	40800	40500	25.9	4.57	-40.5	-9999	-40.2	0.3	-9999	-9999	-9999
2003	324	40800	41400	41100	26.7	4.46	-40.5	-9999	-40.22	0.28	-9999	-9999	-9999
2003	324	41400	42000	41700	25.9	4.25	-40.52	-9999	-40.32	0.2	-9999	-9999	-9999
2003	324	42000	42600	42300	27	4.28	-40.59	-9999	-40.3	0.29	-9999	-9999	-9999
2003	324	42600	43200	42900	27.1	4.19	-40.53	-9999	-40.2	0.33	-9999	-9999	-9999
2003	324	43200	43800	43500	27.4998	3.97	-40.5	-9999	-40.28	0.22	-9999	-9999	-9999
2003	324	43800	44400	44100	29.7	4.09	-40.41	-9999	-40.2	0.21	-9999	-9999	-9999
2003	324	44400	45000	44700	29	3.98	-40.32	-9999	-40.2	0.12	-9999	-9999	-9999
2003	324	45000	45600	45300	30.2	4.09	-40.47	-9999	-40.41	0.06	-9999	-9999	-9999
2003	324	45600	46200	45900	29.1	4.13	-40.46	-9999	-40.4	0.06	-9999	-9999	-9999
2003	324	46200	46800	46500	29.5999	4.04	-40.45	-9999	-40.28	0.17	-9999	-9999	-9999
2003	324	46800	47400	47100	27.5	4.01	-40.33	-9999	-40.2	0.13	-9999	-9999	-9999
2003	324	47400	48000	47700	21.8	4.02	-40.39	-9999	-40.2	0.19	-9999	-9999	-9999
2003	324	48000	48600	48300	17.1428	3.91429	-40.475	-9999	-40.2	0.275	-9999	-9999	-9999
2003	324	48600	49200	48900	17.4444	4.21111	-40.4	-9999	-40.2	0.2	-9999	-9999	-9999
2003	324	49200	49800	49500	18.8	4.23	-40.43	-9999	-40.2	0.23	-9999	-9999	-9999
2003	324	49800	50400	50100	18.8	3.91	-40.5	-9999	-40.2	0.3	-9999	-9999	-9999
2003	324	50400	51000	50700	21.3001	3.95	-40.5	-9999	-40.2	0.3	-9999	-9999	-9999
2003	324	51000	51600	51300	26.5001	4.03	-40.5	-9999	-40.2	0.3	-9999	-9999	-9999
2003	324	51600	52200	51900	27.7	3.89	-40.5	-9999	-40.2	0.3	-9999	-9999	-9999
2003	324	52200	52800	52500	27.6	3.81	-40.55	-9999	-40.2	0.35	-9999	-9999	-9999
2003	324	52800	53400	53100	23.7	3.78	-40.59	-9999	-40.22	0.37	-9999	-9999	-9999
2003	324	53400	54000	53700	23.2	3.96	-40.62	-9999	-40.36	0.26	-9999	-9999	-9999
2003	324	54000	54600	54300	26.1	3.88	-40.6	-9999	-40.28	0.32	-9999	-9999	-9999
2003	324	54600	55200	54900	27.8	3.83	-40.6	-9999	-40.24	0.36	-9999	-9999	-9999
2003	324	55200	55800	55500	30.7	3.63	-40.6	-9999	-40.3	0.3	-9999	-9999	-9999
2003	324	55800	56400	56100	29.9	3.65	-40.61	-9999	-40.24	0.37	-9999	-9999	-9999
2003	324	56400	57000	56700	26.6	3.75	-40.6	-9999	-40.2	0.4	-9999	-9999	-9999
2003	324	57000	57600	57300	25.9	3.92	-40.6	-9999	-40.1	0.5	-9999	-9999	-9999
2003	324	57600	58200	57900	21.8	3.83	-40.6	-9999	-40.1	0.5	-9999	-9999	-9999
2003	324	58200	58800	58500	19.6666	4.01667	-40.5167	-9999	-40	0.516667	-9999	-9999	-9999
2003	324	58800	59400	59100	18.1667	4.26667	-40.5	-9999	-40.0333	0.466667	-9999	-9999	-9999
2003	324	59400	60000	59700	21.5999	4.21	-40.52	-9999	-40.1	0.42	-9999	-9999	-9999
2003	324	60000	60600	60300	21.2999	4.22	-40.5	-9999	-40.06	0.44	-9999	-9999	-9999
2003	324	60600	61200	60900	20.4	4.03	-40.5	-9999	-40.06	0.44	-9999	-9999	-9999
2003	324	61200	61800	61500	19.8	3.9	-40.53	-9999	-40.2	0.33	-9999	-9999	-9999
2003	324	61800	62400	62100	16.6666	3.7	-40.4667	-9999	-40.1667	0.3	-9999	-9999	-9999
2003	324	62400	63000	62700	16.3334	3.8	-40.4	-9999	-40	0.4	-9999	-9999	-9999
2003	324	63000	63600	63300	12.9999	3.97	-40.42	-9999	-40.04	0.38	-9999	-9999	-9999
2003	324	63600	64200	63900	12.5	3.83333	-40.5	-9999	-40.1	0.4	-9999	-9999	-9999
2003	324	64200	64800	64500	13.9	3.89	-40.5	-9999	-40.02	0.48	-9999	-9999	-9999
2003	324	64800	65400	65100	15.3	3.91	-40.5	-9999	-40.2	0.3	-9999	-9999	-9999
2003	324	65400	66000	65700	20.1999	3.82	-40.56	-9999	-40.06	0.5	-9999	-9999	-9999
2003	324	66000	66600	66300	22.7	3.7	-40.6	-9999	-39.99	0.61	-9999	-9999	-9999
2003	324	66600	67200	66900	20.1669	3.73333	-40.6	-9999	-39.9	0.7	-9999	-9999	-9999
2003	324	67200	67800	67500	15.0001	4.12	-40.67	-9999	-39.95	0.72	-9999	-9999	-9999
2003	324	67800	68400	68100	15.7	3.96	-40.61	-9999	-39.98	0.63	-9999	-9999	-9999
2003	324	68400	69000	68700	15	3.9	-40.61	-9999	-39.99	0.62	-9999	-9999	-9999
2003	324	69000	69600	69300	19	3.68571	-40.6571	-9999	-40	0.657143	-9999	-9999	-9999
2003	324	69600	70200	69900	20.7777	3.61111	-40.8	-9999	-40.0444	0.755556	-9999	-9999	-9999
2003	324	70200	70800	70500	24.7	3.45	-40.8	-9999	-40.18	0.62	-9999	-9999	-9999
2003	324	70800	71400	71100	27.5001	3.48	-40.8	-9999	-40.18	0.62	-9999	-9999	-9999
2003	324	71400	72000	71700	27.5	3.62	-40.73	-9999	-39.95	0.78	-9999	-9999	-9999
2003	324	72000	72600	72300	27.8	3.46	-40.74	-9999	-39.98	0.76	-9999	-9999	-9999
2003	324	72600	73200	72900	29	3.31667	-40.7833	-9999	-40.0667	0.716667	-9999	-9999	-9999
2003	324	73200	73800	73500	28.4999	3.35	-40.8	-9999	-40.16	0.64	-9999	-9999	-9999
2003	324	73800	74400	74100	26.3	3.55	-40.8	-9999	-40.2	0.6	-9999	-9999	-9999
2003	324	74400	75000	74700	24.5	3.49	-40.8	-9999	-40.2	0.6	-9999	-9999	-9999
2003	324	75000	75600	75300	23.7	3.51	-40.8	-9999	-40.18	0.62	-9999	-9999	-9999
2003	324	75600	76200	75900	23.7999	3.66	-40.84	-9999	-40.18	0.66	-9999	-9999	-9999
2003	324	76200	76800	76500	30.5	3.65	-40.95	-9999	-9999	-9999	-9999	-9999	-9999
2003	324	76800	77400	77100	28.5	3.775	-41	-9999	-40.5222	0.477778	-9999	-9999	-9999
2003	324	77400	78000	77700	30.2	3.92	-41.08	-9999	-40.58	0.5	-9999	-9999	-9999
2003	324	78000	78600	78300	30.2998	4.2	-41.1	-9999	-40.2	0.9	-9999	-9999	-9999
2003	324	78600	79200	78900	33.5	3.97	-41.12	-9999	-40.18	0.94	-9999	-9999	-9999
2003	324	79200	79800	79500	34.2	3.77	-41.23	-9999	-40.28	0.95	-9999	-9999	-9999
2003	324	79800	80400	80100	37.3998	3.59	-41.29	-9999	-40.47	0.82	-9999	-9999	-9999
2003	324	80400	81000	80700	41.0002	3.17143	-41.3	-9999	-40.7	0.6	-9999	-9999	-9999
2003	324	81000	81600	81300	39.3331	3.27778	-41.3	-9999	-40.7	0.6	-9999	-9999	-9999
2003	324	81600	82200	81900	45.2	2.99	-41.3	-9999	-40.93	0.37	-9999	-9999	-9999
2003	324	82200	82800	82500	44	2.91	-41.3	-9999	-40.8	0.5	-9999	-9999	-9999
2003	324	82800	83400	83100	43.6	2.96	-41.31	-9999	-40.7	0.61	-9999	-9999	-9999
2003	324	83400	84000	83700	43.7999	2.75	-41.38	-9999	-40.96	0.42	-9999	-9999	-9999
2003	324	84000	84600	84300	36.7998	3.33	-41.38	-9999	-40.91	0.47	-9999	-9999	-9999
2003	324	84600	85200	84900	36.8	3.68	-41.56	-9999	-40.78	0.78	-9999	-9999	-9999
2003	324	85200	85800	85500	36	3.56667	-41.0833	-9999	-40.3167	0.766667	-9999	-9999	-9999
2003	324	85800	86400	86100	40.4006	3.55	-40.87	-9999	-40.36	0.51	-9999	-9999	-9999
2003	325	0	600	300	43.9	3.24	-41.37	-9999	-40.53	0.84	-9999	-9999	-9999
2003	325	600	1200	900	46.9	3.32	-41.49	-9999	-40.63	0.86	-9999	-9999	-9999
2003	325	1200	1800	1500	45.5	3.52	-41.55	-9999	-40.56	0.99	-9999	-9999	-9999
2003	325	1800	2400	2100	36.4443	3.68889	-41.3	-9999	-40.5556	0.744444	-9999	-9999	-9999
2003	325	2400	3000	2700	40.6252	3.9625	-41.1	-9999	-40.3125	0.7875	-9999	-9999	-9999
2003	325	3000	3600	3300	44	3.72	-40.78	-9999	-40.56	0.22	-9999	-9999	-9999
2003	325	3600	4200	3900	43.5002	4.02	-41.26	-9999	-40.91	0.35	-9999	-9999	-9999
2003	325	4200	4800	4500	39.8	4.2	-41.18	-9999	-40.81	0.37	-9999	-9999	-9999
2003	325	4800	5400	5100	43.0001	3.91667	-41.1833	-9999	-40.8167	0.366667	-9999	-9999	-9999
2003	325	5400	6000	5700	40.1	3.59	-41.21	-9999	-40.97	0.24	-9999	-9999	-9999
2003	325	6000	6600	6300	38.8	3.67	-41.17	-9999	-40.94	0.23	-9999	-9999	-9999
2003	325	6600	7200	6900	37.0001	3.77	-40.94	-9999	-40.76	0.18	-9999	-9999	-9999
2003	325	7200	7800	7500	35.7	3.84	-40.89	-9999	-40.8	0.09	-9999	-9999	-9999
2003	325	7800	8400	8100	40.6996	3.77	-40.97	-9999	-40.74	0.23	-9999	-9999	-9999
2003	325	8400	9000	8700	45.9	3.84	-41	-9999	-40.73	0.27	-9999	-9999	-9999
2003	325	9000	9600	9300	48.8001	4	-41.02	-9999	-40.65	0.37	-9999	-9999	-9999
2003	325	9600	10200	9900	49	4.16	-41.03	-9999	-40.53	0.5	-9999	-9999	-9999
2003	325	10200	10800	10500	49.7001	4.23	-41	-9999	-40.35	0.65	-9999	-9999	-9999
2003	325	10800	11400	11100	53.8996	3.97	-41.14	-9999	-40.56	0.58	-9999	-9999	-9999
2003	325	11400	12000	11700	56	3.93333	-41.2	-9999	-40.4333	0.766667	-9999	-9999	-9999
2003	325	12000	12600	12300	55.2223	3.91111	-41.3	-9999	-40.6333	0.666667	-9999	-9999	-9999
2003	325	12600	13200	12900	52.5	3.93	-41.24	-9999	-40.71	0.53	-9999	-9999	-9999
2003	325	13200	13800	13500	55.1003	3.91	-41.21	-9999	-40.73	0.48	-9999	-9999	-9999
2003	325	13800	14400	14100	56.7001	3.86	-41.25	-9999	-40.64	0.61	-9999	-9999	-9999
2003	325	14400	15000	14700	56.2	3.81	-41.25	-9999	-40.72	0.53	-9999	-9999	-9999
2003	325	15000	15600	15300	57.6001	3.71	-41.22	-9999	-40.64	0.58	-9999	-9999	-9999
2003	325	15600	16200	15900	57.3333	3.73333	-41.15	-9999	-40.3333	0.816667	-9999	-9999	-9999
2003	325	16200	16800	16500	60.9	4.01	-41.06	-9999	-40.36	0.7	-9999	-9999	-9999
2003	325	16800	17400	17100	61.1	4.31	-41.17	-9999	-40.41	0.76	-9999	-9999	-9999
2003	325	17400	18000	17700	60.8	4.36	-41.21	-9999	-40.69	0.52	-9999	-9999	-9999
2003	325	18000	18600	18300	62.7002	4.36	-41.28	-9999	-40.82	0.46	-9999	-9999	-9999
2003	325	18600	19200	18900	63.9	4.45	-41.39	-9999	-40.94	0.45	-9999	-9999	-9999
2003	325	19200	19800	19500	64.1	4.45	-41.43	-9999	-41.04	0.39	-9999	-9999	-9999
2003	325	19800	20400	20100	66.8	4.45	-41.41	-9999	-41	0.41	-9999	-9999	-9999
2003	325	20400	21000	20700	67.2857	4.6	-41.3857	-9999	-41.0429	0.342857	-9999	-9999	-9999
2003	325	21000	21600	21300	65.7	4.72	-41.44	-9999	-41.1	0.34	-9999	-9999	-9999
2003	325	21600	22200	21900	64.5	4.84	-41.37	-9999	-40.92	0.45	-9999	-9999	-9999
2003	325	22200	22800	22500	64.5	4.83	-41.27	-9999	-40.79	0.48	-9999	-9999	-9999
2003	325	22800	23400	23100	64	4.71	-41.27	-9999	-40.77	0.5	-9999	-9999	-9999
2003	325	23400	24000	23700	63.2	4.91	-41.16	-9999	-40.61	0.55	-9999	-9999	-9999
2003	325	24000	24600	24300	61.9	5.1	-40.96	-9999	-40.36	0.6	-9999	-9999	-9999
2003	325	24600	25200	24900	64.1	4.9	-40.8	-9999	-40.18	0.62	-9999	-9999	-9999
2003	325	25200	25800	25500	65.4	5.19	-40.69	-9999	-40.16	0.53	-9999	-9999	-9999
2003	325	25800	26400	26100	66.7144	5.44286	-40.5714	-9999	-39.9571	0.614286	-9999	-9999	-9999
2003	325	26400	27000	26700	65.4001	5.39	-40.47	-9999	-40.05	0.42	-9999	-9999	-9999
2003	325	27000	27600	27300	65.2	5.26	-40.5	-9999	-40.03	0.47	-9999	-9999	-9999
2003	325	27600	28200	27900	66.1	5.35	-40.44	-9999	-39.89	0.55	-9999	-9999	-9999
2003	325	28200	28800	28500	66.2	5.09	-40.33	-9999	-39.81	0.52	-9999	-9999	-9999
2003	325	28800	29400	29100	65.6	5.18	-40.3	-9999	-39.82	0.48	-9999	-9999	-9999
2003	325	29400	30000	29700	64.2857	5.2	-40.2429	-9999	-39.7143	0.528571	-9999	-9999	-9999
2003	325	30000	30600	30300	65.7	5.38	-40.29	-9999	-39.77	0.52	-9999	-9999	-9999
2003	325	30600	31200	30900	64.1	5.57	-40.3	-9999	-39.65	0.65	-9999	-9999	-9999
2003	325	31200	31800	31500	61.1	5.66	-40.13	-9999	-39.59	0.54	-9999	-9999	-9999
2003	325	31800	32400	32100	61.1	5.79	-40.03	-9999	-39.54	0.49	-9999	-9999	-9999
2003	325	32400	33000	32700	59.2	5.89	-39.92	-9999	-39.5	0.42	-9999	-9999	-9999
2003	325	33000	33600	33300	59.6	5.99	-39.99	-9999	-39.55	0.44	-9999	-9999	-9999
2003	325	33600	34200	33900	55.3999	5.74	-40	-9999	-39.57	0.43	-9999	-9999	-9999
2003	325	34200	34800	34500	52.5	5.42	-40	-9999	-39.62	0.38	-9999	-9999	-9999
2003	325	34800	35400	35100	52.3	5.32	-40.05	-9999	-39.69	0.36	-9999	-9999	-9999
2003	325	35400	36000	35700	52.5	5.35	-40.1	-9999	-39.72	0.38	-9999	-9999	-9999
2003	325	36000	36600	36300	49.3	5.07	-40.04	-9999	-39.73	0.31	-9999	-9999	-9999
2003	325	36600	37200	36900	49.2999	4.78	-40.01	-9999	-39.74	0.27	-9999	-9999	-9999
2003	325	37200	37800	37500	54.3	5	-40	-9999	-39.7	0.3	-9999	-9999	-9999
2003	325	37800	38400	38100	50	5.5	-39.95	-9999	-39.71	0.24	-9999	-9999	-9999
2003	325	38400	39000	38700	47	6.09	-39.92	-9999	-39.7	0.22	-9999	-9999	-9999
2003	325	39000	39600	39300	45.8	5.7	-39.94	-9999	-39.74	0.2	-9999	-9999	-9999
2003	325	39600	40200	39900	44.8	5.8	-39.86	-9999	-39.7	0.16	-9999	-9999	-9999
2003	325	40200	40800	40500	43.6667	5.91111	-39.8	-9999	-39.6111	0.188889	-9999	-9999	-9999
2003	325	40800	41400	41100	43	6.225	-39.7375	-9999	-39.5125	0.225	-9999	-9999	-9999
2003	325	41400	42000	41700	45.4	6.04	-39.71	-9999	-39.51	0.2	-9999	-9999	-9999
2003	325	42000	42600	42300	43.7	5.6	-39.62	-9999	-39.52	0.1	-9999	-9999	-9999
2003	325	42600	43200	42900	43.1	5.53	-39.6	-9999	-39.5	0.1	-9999	-9999	-9999
2003	325	43200	43800	43500	43.8	5.35	-39.57	-9999	-39.48	0.09	-9999	-9999	-9999
2003	325	43800	44400	44100	43.2002	5.36	-39.49	-9999	-39.4	0.09	-9999	-9999	-9999
2003	325	44400	45000	44700	36.9998	5.59	-39.38	-9999	-39.3	0.08	-9999	-9999	-9999
2003	325	45000	45600	45300	35.8	5.98	-39.25	-9999	-39.2	0.05	-9999	-9999	-9999
2003	325	45600	46200	45900	32.2001	6.25	-39.28	-9999	-39.14	0.14	-9999	-9999	-9999
2003	325	46200	46800	46500	29.6	6.53	-39.11	-9999	-39.04	0.07	-9999	-9999	-9999
2003	325	46800	47400	47100	29.7	6.6	-39.1	-9999	-39.02	0.08	-9999	-9999	-9999
2003	325	47400	48000	47700	30.8571	6.61429	-39.1	-9999	-39	0.1	-9999	-9999	-9999
2003	325	48000	48600	48300	32.9	6.1	-39.11	-9999	-39.1	0.01	-9999	-9999	-9999
2003	325	48600	49200	48900	29.4	6.1	-39.03	-9999	-39.08	-0.05	-9999	-9999	-9999
2003	325	49200	49800	49500	27	5.99	-39.01	-9999	-39	0.01	-9999	-9999	-9999
2003	325	49800	50400	50100	27.1	5.77	-38.95	-9999	-39.03	-0.08	-9999	-9999	-9999
2003	325	50400	51000	50700	24.1	5.88	-39.06	-9999	-39.08	-0.02	-9999	-9999	-9999
2003	325	51000	51600	51300	22	6.06	-38.89	-9999	-38.95	-0.06	-9999	-9999	-9999
2003	325	51600	52200	51900	18.7999	6.2	-38.76	-9999	-38.84	-0.08	-9999	-9999	-9999
2003	325	52200	52800	52500	17.7	6	-38.77	-9999	-38.82	-0.05	-9999	-9999	-9999
2003	325	52800	53400	53100	18.9	5.87	-38.75	-9999	-38.9	-0.15	-9999	-9999	-9999
2003	325	53400	54000	53700	17	5.59	-38.82	-9999	-38.96	-0.14	-9999	-9999	-9999
2003	325	54000	54600	54300	18	5.43	-38.8	-9999	-39	-0.2	-9999	-9999	-9999
2003	325	54600	55200	54900	17.6	5.13	-38.87	-9999	-39.01	-0.14	-9999	-9999	-9999
2003	325	55200	55800	55500	15.4	5.06	-38.9	-9999	-39	-0.1	-9999	-9999	-9999
2003	325	55800	56400	56100	12.9	4.69	-38.97	-9999	-39.02	-0.05	-9999	-9999	-9999
2003	325	56400	57000	56700	11.8	4.61	-38.9	-9999	-39	-0.1	-9999	-9999	-9999
2003	325	57000	57600	57300	11.9	4.64	-38.9	-9999	-39	-0.1	-9999	-9999	-9999
2003	325	57600	58200	57900	12.2	4.67	-38.92	-9999	-39	-0.08	-9999	-9999	-9999
2003	325	58200	58800	58500	12.6	4.59	-38.98	-9999	-39	-0.02	-9999	-9999	-9999
2003	325	58800	59400	59100	13.3	4.44	-38.98	-9999	-39	-0.02	-9999	-9999	-9999
2003	325	59400	60000	59700	12.6	4.44	-39	-9999	-39.02	-0.02	-9999	-9999	-9999
2003	325	60000	60600	60300	12	4.38	-39	-9999	-39.05	-0.05	-9999	-9999	-9999
2003	325	60600	61200	60900	10.6	4.54	-39	-9999	-39.07	-0.07	-9999	-9999	-9999
2003	325	61200	61800	61500	7.90001	4.46	-39	-9999	-39.06	-0.06	-9999	-9999	-9999
2003	325	61800	62400	62100	8.85721	4.52857	-39	-9999	-39	0	-9999	-9999	-9999
2003	325	62400	63000	62700	9	4.45	-38.99	-9999	-39.07	-0.08	-9999	-9999	-9999
2003	325	63000	63600	63300	9.10001	4.36	-39	-9999	-39.05	-0.05	-9999	-9999	-9999
2003	325	63600	64200	63900	8.80002	4.45	-39	-9999	-39.01	-0.01	-9999	-9999	-9999
2003	325	64200	64800	64500	8.29998	4.64	-38.93	-9999	-39.01	-0.08	-9999	-9999	-9999
2003	325	64800	65400	65100	13	4.37	-38.92	-9999	-39	-0.08	-9999	-9999	-9999
2003	325	65400	66000	65700	15	4.27	-39	-9999	-39	0	-9999	-9999	-9999
2003	325	66000	66600	66300	14.2	4.3	-39.01	-9999	-38.99	0.02	-9999	-9999	-9999
2003	325	66600	67200	66900	14.8	4.12	-39.1	-9999	-39.04	0.06	-9999	-9999	-9999
2003	325	67200	67800	67500	11.6	3.82	-39.29	-9999	-39.11	0.18	-9999	-9999	-9999
2003	325	67800	68400	68100	11.5	3.91	-39.3	-9999	-39.1	0.2	-9999	-9999	-9999
2003	325	68400	69000	68700	12.7	4	-39.25	-9999	-39.06	0.19	-9999	-9999	-9999
2003	325	69000	69600	69300	13.8	4.03	-39.2	-9999	-39.09	0.11	-9999	-9999	-9999
2003	325	69600	70200	69900	15	3.84	-39.2	-9999	-39.09	0.11	-9999	-9999	-9999
2003	325	70200	70800	70500	19.3	3.66	-39.2	-9999	-39.03	0.17	-9999	-9999	-9999
2003	325	70800	71400	71100	21	3.4	-39.23	-9999	-39.08	0.15	-9999	-9999	-9999
2003	325	71400	72000	71700	23.4	3.22	-39.3	-9999	-39.09	0.21	-9999	-9999	-9999
2003	325	72000	72600	72300	23.2	3.22	-39.3	-9999	-39.1	0.2	-9999	-9999	-9999
2003	325	72600	73200	72900	23.2222	3.42222	-39.3889	-9999	-39.0444	0.344444	-9999	-9999	-9999
2003	325	73200	73800	73500	25.875	3.4625	-39.3375	-9999	-38.9875	0.35	-9999	-9999	-9999
2003	325	73800	74400	74100	25	3.52	-39.3	-9999	-38.93	0.37	-9999	-9999	-9999
2003	325	74400	75000	74700	27.5	3.42	-39.31	-9999	-38.93	0.38	-9999	-9999	-9999
2003	325	75000	75600	75300	32.4	3.14	-39.44	-9999	-39.05	0.39	-9999	-9999	-9999
2003	325	75600	76200	75900	37.5001	3.07	-39.5	-9999	-39.05	0.45	-9999	-9999	-9999
2003	325	76200	76800	76500	43.3002	2.99	-39.58	-9999	-39.17	0.41	-9999	-9999	-9999
2003	325	76800	77400	77100	41.2	3.33	-39.69	-9999	-39.25	0.44	-9999	-9999	-9999
2003	325	77400	78000	77700	39.2	3.55	-39.69	-9999	-39.13	0.56	-9999	-9999	-9999
2003	325	78000	78600	78300	43.9994	2.96	-39.78	-9999	-39.25	0.53	-9999	-9999	-9999
2003	325	78600	79200	78900	54.0007	2.62	-39.86	-9999	-39.45	0.41	-9999	-9999	-9999
2003	325	79200	79800	79500	58.6999	1.92	-40.85	-9999	-39.66	1.19	-9999	-9999	-9999
2003	325	79800	80400	80100	52.1	2.26	-40.65	-9999	-39.57	1.08	-9999	-9999	-9999
2003	325	80400	81000	80700	57.8003	2.11	-40.95	-9999	-39.6	1.35	-9999	-9999	-9999
2003	325	81000	81600	81300	59.1	2.42	-41	-9999	-39.55	1.45	-9999	-9999	-9999
2003	325	81600	82200	81900	55.4999	2.84	-40.88	-9999	-39.37	1.51	-9999	-9999	-9999
2003	325	82200	82800	82500	63.0008	2.77	-40.8	-9999	-39.32	1.48	-9999	-9999	-9999
2003	325	82800	83400	83100	66.5999	2.95	-40.84	-9999	-39.32	1.52	-9999	-9999	-9999
2003	325	83400	84000	83700	66.7143	3.05714	-40.9429	-9999	-39.4286	1.51429	-9999	-9999	-9999
2003	325	84000	84600	84300	67	3.05	-41	-9999	-39.56	1.44	-9999	-9999	-9999
2003	325	84600	85200	84900	65.4995	3.13	-41	-9999	-39.42	1.58	-9999	-9999	-9999
2003	325	85200	85800	85500	71.8	2.94	-40.89	-9999	-39.75	1.14	-9999	-9999	-9999
2003	325	85800	86400	86100	69.6	2.82	-40.79	-9999	-40.11	0.68	-9999	-9999	-9999
2003	326	0	600	300	67.5003	2.9	-9999	-9999	-40.1333	-9999	-9999	-9999	-9999
2003	326	600	1200	900	63.2002	3.37	-40.88	-9999	-39.72	1.44	-9999	-9999	-9999
2003	326	1200	1800	1500	64.3	3.33	-40.8	-9999	-39.47	1.33	-9999	-9999	-9999
2003	326	1800	2400	2100	61.5999	3.17	-40.8	-9999	-39.41	1.39	-9999	-9999	-9999
2003	326	2400	3000	2700	63.4	3.28	-40.8	-9999	-39.48	1.32	-9999	-9999	-9999
2003	326	3000	3600	3300	63.5	3.17	-40.67	-9999	-39.41	1.26	-9999	-9999	-9999
2003	326	3600	4200	3900	63.4	3.2	-40.46	-9999	-39.52	0.94	-9999	-9999	-9999
2003	326	4200	4800	4500	64.6	3.14	-40.46	-9999	-39.35	1.11	-9999	-9999	-9999
2003	326	4800	5400	5100	71.6007	2.99	-40.53	-9999	-39.35	1.18	-9999	-9999	-9999
2003	326	5400	6000	5700	76.6	2.95	-40.6	-9999	-39.58	1.02	-9999	-9999	-9999
2003	326	6000	6600	6300	75.2002	3.09	-40.57	-9999	-39.76	0.81	-9999	-9999	-9999
2003	326	6600	7200	6900	71.6998	3.28	-40.5	-9999	-39.59	0.91	-9999	-9999	-9999
2003	326	7200	7800	7500	64.9995	3.28	-40.41	-9999	-39.32	1.09	-9999	-9999	-9999
2003	326	7800	8400	8100	61.6	3.32	-40.36	-9999	-39.3	1.06	-9999	-9999	-9999
2003	326	8400	9000	8700	56.3002	3.49	-40.23	-9999	-39.13	1.1	-9999	-9999	-9999
2003	326	9000	9600	9300	53.4	3.58	-40.02	-9999	-39.17	0.85	-9999	-9999	-9999
2003	326	9600	10200	9900	55.1997	3.36	-39.94	-9999	-39.11	0.83	-9999	-9999	-9999
2003	326	10200	10800	10500	54.9001	3.54	-39.92	-9999	-39.21	0.71	-9999	-9999	-9999
2003	326	10800	11400	11100	52.6	3.79	-39.9	-9999	-39.15	0.75	-9999	-9999	-9999
2003	326	11400	12000	11700	53.6	3.57	-39.89	-9999	-39.2	0.69	-9999	-9999	-9999
2003	326	12000	12600	12300	51.1	3.5	-39.79	-9999	-39.2	0.59	-9999	-9999	-9999
2003	326	12600	13200	12900	48.7001	3.42	-39.67	-9999	-39.12	0.55	-9999	-9999	-9999
2003	326	13200	13800	13500	46.3	3.5	-39.51	-9999	-39.02	0.49	-9999	-9999	-9999
2003	326	13800	14400	14100	46.5	3.73	-39.5	-9999	-38.98	0.52	-9999	-9999	-9999
2003	326	14400	15000	14700	49.4999	3.81	-39.5	-9999	-38.97	0.53	-9999	-9999	-9999
2003	326	15000	15600	15300	51.7	3.8	-39.54	-9999	-39	0.54	-9999	-9999	-9999
2003	326	15600	16200	15900	43.6996	4.01	-39.5	-9999	-39	0.5	-9999	-9999	-9999
2003	326	16200	16800	16500	43.1999	4.11	-39.41	-9999	-38.88	0.53	-9999	-9999	-9999
2003	326	16800	17400	17100	48.3001	4.06	-39.49	-9999	-38.94	0.55	-9999	-9999	-9999
2003	326	17400	18000	17700	51.4	3.82	-39.6	-9999	-39.11	0.49	-9999	-9999	-9999
2003	326	18000	18600	18300	54.4	3.84	-39.62	-9999	-39.13	0.49	-9999	-9999	-9999
2003	326	18600	19200	18900	55.1	3.87	-39.62	-9999	-39.15	0.47	-9999	-9999	-9999
2003	326	19200	19800	19500	54.1	4.08	-39.6	-9999	-39.16	0.44	-9999	-9999	-9999
2003	326	19800	20400	20100	53.8999	4.3	-39.61	-9999	-39.05	0.56	354.363	-9999	-9999
2003	326	20400	21000	20700	54.8	4.33	-39.75	-9999	-39.17	0.58	362.527	-9999	-9999
2003	326	21000	21600	21300	54.8	4.2	-39.8	-9999	-39.21	0.59	361.1	-9999	-9999
2003	326	21600	22200	21900	55.2999	4.06	-39.8	-9999	-39.09	0.71	352.798	-9999	-9999
2003	326	22200	22800	22500	56.4998	3.83	-39.71	-9999	-39.12	0.59	338.047	-9999	-9999
2003	326	22800	23400	23100	61.6999	4.11	-39.7	-9999	-39.19	0.51	340.72	-9999	-9999
2003	326	23400	24000	23700	62.5	3.93	-39.8	-9999	-39.35	0.45	348.812	-9999	-9999
2003	326	24000	24600	24300	61.4001	3.92	-39.8	-9999	-39.21	0.59	344.296	-9999	-9999
2003	326	24600	25200	24900	61.7001	3.96	-39.8	-9999	-39.16	0.64	337.78	-9999	-9999
2003	326	25200	25800	25500	57.8	4.01	-39.67	-9999	-39.13	0.54	359.998	-9999	-9999
2003	326	25800	26400	26100	55.1996	4.22	-39.5	-9999	-39.01	0.49	377.575	-9999	-9999
2003	326	26400	27000	26700	54.1	4.36	-39.45	-9999	-39.04	0.41	366.972	-9999	-9999
2003	326	27000	27600	27300	54.7	4.23	-39.5	-9999	-39.05	0.45	324.85	-9999	-9999
2003	326	27600	28200	27900	54.5	4.21	-39.5	-9999	-39.02	0.48	286.454	-9999	-9999
2003	326	28200	28800	28500	53.8	3.97	-39.44	-9999	-39.01	0.43	265.047	-9999	-9999
2003	326	28800	29400	29100	57.7	3.63	-39.58	-9999	-39.14	0.44	256.608	-9999	-9999
2003	326	29400	30000	29700	55.3	3.54	-39.64	-9999	-39.12	0.52	243.734	-9999	-9999
2003	326	30000	30600	30300	51.5	3.65	-39.63	-9999	-39	0.63	243.22	-9999	-9999
2003	326	30600	31200	30900	47.2	3.89	-39.28	-9999	-38.7	0.58	249.078	-9999	-9999
2003	326	31200	31800	31500	47.2	4.15	-39.01	-9999	-38.59	0.42	249.609	-9999	-9999
2003	326	31800	32400	32100	43.7778	4.55556	-38.8889	-9999	-38.5222	0.366667	240.1	-9999	-9999
2003	326	32400	33000	32700	40.125	4.9	-38.7875	-9999	-38.4	0.3875	259.11	-9999	-9999
2003	326	33000	33600	33300	40.2857	4.74286	-38.7429	-9999	-38.4286	0.314286	246.731	-9999	-9999
2003	326	33600	34200	33900	38.9	4.74	-38.71	-9999	-38.4	0.31	246.137	-9999	-9999
2003	326	34200	34800	34500	37.2	4.74	-38.64	-9999	-38.38	0.26	262.405	-9999	-9999
2003	326	34800	35400	35100	37.7	4.79	-38.62	-9999	-38.34	0.28	268.388	-9999	-9999
2003	326	35400	36000	35700	38	4.7	-38.66	-9999	-38.37	0.29	247.253	-9999	-9999
2003	326	36000	36600	36300	41.9	4.3	-38.6	-9999	-38.39	0.21	233.878	-9999	-9999
2003	326	36600	37200	36900	44.4	4.49	-38.48	-9999	-38.21	0.27	246.396	-9999	-9999
2003	326	37200	37800	37500	45.6	4.29	-38.42	-9999	-38.22	0.2	253.143	-9999	-9999
2003	326	37800	38400	38100	48.6	4.31	-38.57	-9999	-38.21	0.36	247.427	-9999	-9999
2003	326	38400	39000	38700	48.1	4.15	-38.6	-9999	-38.18	0.42	249.359	-9999	-9999
2003	326	39000	39600	39300	46.4999	4.33	-38.5	-9999	-38.11	0.39	250.063	-9999	-9999
2003	326	39600	40200	39900	45.6003	4.2	-38.47	-9999	-38.02	0.45	260.326	-9999	-9999
2003	326	40200	40800	40500	44.8004	4.12	-38.54	-9999	-38.06	0.48	262.272	-9999	-9999
2003	326	40800	41400	41100	45.6	4.24	-38.55	-9999	-38.02	0.53	263.81	-9999	-9999
2003	326	41400	42000	41700	41.1999	4.78	-38.27	-9999	-37.87	0.4	260.924	-9999	-9999
2003	326	42000	42600	42300	41	5.17	-38.25	-9999	-37.82	0.43	252.018	-9999	-9999
2003	326	42600	43200	42900	38.8998	5	-38.25	-9999	-37.79	0.46	262.275	-9999	-9999
2003	326	43200	43800	43500	37.8	4.93	-38.26	-9999	-37.77	0.49	261.852	-9999	-9999
2003	326	43800	44400	44100	39.5001	4.67	-38.3	-9999	-37.8	0.5	275.29	-9999	-9999
2003	326	44400	45000	44700	38.4001	4.75	-38.29	-9999	-37.79	0.5	283.869	-9999	-9999
2003	326	45000	45600	45300	32.6	4.76	-38.25	-9999	-37.78	0.47	289.673	-9999	-9999
2003	326	45600	46200	45900	32.8999	5.02	-38	-9999	-37.63	0.37	324.808	-9999	-9999
2003	326	46200	46800	46500	36.1	4.84	-38.03	-9999	-37.62	0.41	380.194	-9999	-9999
2003	326	46800	47400	47100	36.4	4.87	-38.03	-9999	-37.62	0.41	372.919	-9999	-9999
2003	326	47400	48000	47700	37.5	4.52	-38.08	-9999	-37.69	0.39	293.506	-9999	-9999
2003	326	48000	48600	48300	40.3	4.37	-38.11	-9999	-37.7	0.41	273.504	-9999	-9999
2003	326	48600	49200	48900	43.7001	4.18	-38.15	-9999	-37.73	0.42	267.219	-9999	-9999
2003	326	49200	49800	49500	49.2999	3.73	-38.32	-9999	-37.86	0.46	268.594	-9999	-9999
2003	326	49800	50400	50100	53.1	2.78	-38.85	-9999	-38.13	0.72	266.235	-9999	-9999
2003	326	50400	51000	50700	47.1003	3.18	-38.83	-9999	-38.04	0.79	262.973	-9999	-9999
2003	326	51000	51600	51300	42.8	3.89	-38.26	-9999	-37.86	0.4	264.91	-9999	-9999
2003	326	51600	52200	51900	38.6	4.72	-38.05	-9999	-37.72	0.33	271.565	-9999	-9999
2003	326	52200	52800	52500	37.2	4.97	-37.99	-9999	-37.69	0.3	276.708	-9999	-9999
2003	326	52800	53400	53100	38.2	5.02	-37.95	-9999	-37.7	0.25	282.465	-9999	-9999
2003	326	53400	54000	53700	36.8	4.94	-37.89	-9999	-37.69	0.2	275.882	-9999	-9999
2003	326	54000	54600	54300	33.7	5.13	-37.8	-9999	-37.65	0.15	274.735	-9999	-9999
2003	326	54600	55200	54900	34.6001	5.04	-37.86	-9999	-37.7	0.16	284.206	-9999	-9999
2003	326	55200	55800	55500	35.4	4.99	-37.81	-9999	-37.63	0.18	270.829	-9999	-9999
2003	326	55800	56400	56100	35.3	4.93	-37.81	-9999	-37.6	0.21	256.644	-9999	-9999
2003	326	56400	57000	56700	34.4	4.97	-37.8	-9999	-37.62	0.18	252.922	-9999	-9999
2003	326	57000	57600	57300	34.8	4.97	-37.81	-9999	-37.61	0.2	248.902	-9999	-9999
2003	326	57600	58200	57900	34.6	4.65	-37.87	-9999	-37.75	0.12	251.855	-9999	-9999
2003	326	58200	58800	58500	36.2	4.64	-37.98	-9999	-37.8	0.18	257.02	-9999	-9999
2003	326	58800	59400	59100	35	4.67	-37.94	-9999	-37.79	0.15	249.763	-9999	-9999
2003	326	59400	60000	59700	32.8	5.07	-37.84	-9999	-37.72	0.12	250.96	-9999	-9999
2003	326	60000	60600	60300	31.5	5.0875	-37.8	-9999	-37.7	0.1	254.108	-9999	-9999
2003	326	60600	61200	60900	34.25	5.05	-37.8125	-9999	-37.7	0.1125	252.767	-9999	-9999
2003	326	61200	61800	61500	33.6	4.94	-37.85	-9999	-37.73	0.12	255.325	-9999	-9999
2003	326	61800	62400	62100	32.1666	5.05	-37.8286	-9999	-37.7571	0.0714286	253.984	-9999	-9999
2003	326	62400	63000	62700	29.6	5.55	-37.68	-9999	-37.7	-0.02	249.471	-9999	-9999
2003	326	63000	63600	63300	28.5	5.48	-37.71	-9999	-37.73	-0.02	257.176	-9999	-9999
2003	326	63600	64200	63900	27.5	5.08	-37.77	-9999	-37.78	-0.01	258.131	-9999	-9999
2003	326	64200	64800	64500	25.9	4.87	-37.82	-9999	-37.8	0.02	255.773	-9999	-9999
2003	326	64800	65400	65100	25.7	4.8	-37.8	-9999	-37.8	0	265.788	-9999	-9999
2003	326	65400	66000	65700	23.9	4.89	-37.79	-9999	-37.8	-0.01	260.386	-9999	-9999
2003	326	66000	66600	66300	25.2	4.91	-37.8	-9999	-37.8	0	257.91	-9999	-9999
2003	326	66600	67200	66900	25.1	4.96	-37.83	-9999	-37.84	-0.01	260.625	-9999	-9999
2003	326	67200	67800	67500	24.1	4.65	-37.94	-9999	-37.9	0.04	258.035	-9999	-9999
2003	326	67800	68400	68100	23.5	4.39	-38.03	-9999	-37.94	0.09	256.331	-9999	-9999
2003	326	68400	69000	68700	23.3	4.56	-37.98	-9999	-37.94	0.04	250.035	-9999	-9999
2003	326	69000	69600	69300	23.9	4.81	-37.82	-9999	-37.86	-0.04	250.296	-9999	-9999
2003	326	69600	70200	69900	23.6	4.98	-37.91	-9999	-37.86	0.05	259.6	-9999	-9999
2003	326	70200	70800	70500	19.8999	5.35	-37.69	-9999	-37.8	-0.11	251.143	-9999	-9999
2003	326	70800	71400	71100	19.6	5.09	-37.98	-9999	-37.96	0.02	246.459	-9999	-9999
2003	326	71400	72000	71700	20.1	4.98	-38.36	-9999	-38.04	0.32	241.098	-9999	-9999
2003	326	72000	72600	72300	17.1	5.15	-38.19	-9999	-37.82	0.37	256.635	-9999	-9999
2003	326	72600	73200	72900	18.3333	5.13333	-37.8429	-9999	-37.7	0.142857	272.098	-9999	-9999
2003	326	73200	73800	73500	17.5	5.05	-37.88	-9999	-37.7	0.18	279.38	-9999	-9999
2003	326	73800	74400	74100	17.5	5.09	-37.91	-9999	-37.63	0.28	281.522	-9999	-9999
2003	326	74400	75000	74700	15.3	5.11	-37.87	-9999	-37.6	0.27	284.861	-9999	-9999
2003	326	75000	75600	75300	16.4	4.94	-37.81	-9999	-37.61	0.2	288.018	-9999	-9999
2003	326	75600	76200	75900	16.5	4.84	-38.08	-9999	-37.75	0.33	284.91	-9999	-9999
2003	326	76200	76800	76500	17	4.83	-38.12	-9999	-37.82	0.3	268.023	-9999	-9999
2003	326	76800	77400	77100	17.8	5.11	-38.13	-9999	-37.9	0.23	247.938	-9999	-9999
2003	326	77400	78000	77700	15.5	5.01	-38.19	-9999	-37.88	0.31	-9999	-9999	-9999
2003	326	78000	78600	78300	14.3	5.21	-38.29	-9999	-37.76	0.53	-9999	-9999	-9999
2003	326	78600	79200	78900	13.8	5.08	-38.2	-9999	-37.74	0.46	-9999	-9999	-9999
2003	326	79200	79800	79500	13.9	5.2	-38.16	-9999	-37.67	0.49	-9999	-9999	-9999
2003	326	79800	80400	80100	14.1	5.3	-38.06	-9999	-37.6	0.46	-9999	-9999	-9999
2003	326	80400	81000	80700	14.7	5.31	-38	-9999	-37.51	0.49	257.95	-9999	-9999
2003	326	81000	81600	81300	14.9	5.41	-38.08	-9999	-37.47	0.61	265.99	-9999	-9999
2003	326	81600	82200	81900	16.2	5.51	-38.05	-9999	-37.44	0.61	274.437	-9999	-9999
2003	326	82200	82800	82500	16.6	5.58	-38	-9999	-37.35	0.65	283.668	-9999	-9999
2003	326	82800	83400	83100	16.8	5.71	-38	-9999	-37.3	0.7	292.851	-9999	-9999
2003	326	83400	84000	83700	18	5.64	-38	-9999	-37.39	0.61	296.076	-9999	-9999
2003	326	84000	84600	84300	19.4	5.68	-37.96	-9999	-37.22	0.74	305.451	-9999	-9999
2003	326	84600	85200	84900	20.6	5.05	-38.2	-9999	-37.2	1	319.356	-9999	-9999
2003	326	85200	85800	85500	22	5.08	-38.33	-9999	-37.42	0.91	332.392	-9999	-9999
2003	326	85800	86400	86100	22.4	5.14	-38.21	-9999	-37.62	0.59	327.724	-9999	-9999
2003	327	0	600	300	21.6	5.21	-38.14	-9999	-37.54	0.6	332.202	-9999	-9999
2003	327	600	1200	900	21.1	5.2	-38.15	-9999	-37.42	0.73	331.537	-9999	-9999
2003	327	1200	1800	1500	20.5	5.16	-38.18	-9999	-37.29	0.89	323.14	-9999	-9999
2003	327	1800	2400	2100	20.1	5.12	-38.06	-9999	-37.21	0.85	323.764	-9999	-9999
2003	327	2400	3000	2700	21.6667	4.68889	-37.9444	-9999	-37.3556	0.588889	325.252	-9999	-9999
2003	327	3000	3600	3300	23.6	4.39	-37.75	-9999	-37.33	0.42	324.234	-9999	-9999
2003	327	3600	4200	3900	26.3	3.82	-37.72	-9999	-37.49	0.23	330.622	-9999	-9999
2003	327	4200	4800	4500	37.4006	3.44	-37.96	-9999	-37.62	0.34	351.964	-9999	-9999
2003	327	4800	5400	5100	42.6003	3.42	-38.05	-9999	-37.72	0.33	358.354	-9999	-9999
2003	327	5400	6000	5700	40.4	3.69	-38.33	-9999	-37.73	0.6	361.486	-9999	-9999
2003	327	6000	6600	6300	40.2001	3.79	-38.43	-9999	-37.86	0.57	370.526	-9999	-9999
2003	327	6600	7200	6900	36.4996	3.81	-38.57	-9999	-37.91	0.66	386.711	-9999	-9999
2003	327	7200	7800	7500	54.1048	2.42	-38.72	-9999	-38.13	0.59	492.98	-9999	-9999
2003	327	7800	8400	8100	52.0805	2.28	-39.06	-9999	-38.35	0.71	476.938	-9999	-9999
2003	327	8400	9000	8700	40.0007	2.84	-38.93	-9999	-38.24	0.69	453.14	-9999	-9999
2003	327	9000	9600	9300	39.4999	3.2	-38.8	-9999	-38.2	0.6	414.444	-9999	-9999
2003	327	9600	10200	9900	51.8972	2.83	-38.96	-9999	-38.26	0.7	467.579	-9999	-9999
2003	327	10200	10800	10500	51.6934	3.07	-39.19	-9999	-38.27	0.92	493.539	-9999	-9999
2003	327	10800	11400	11100	48.5975	2.95	-39.11	-9999	-38.39	0.72	486.698	-9999	-9999
2003	327	11400	12000	11700	59.5003	2.03	-39.11	-9999	-38.47	0.64	637.604	-9999	-9999
2003	327	12000	12600	12300	50.0997	2.1	-39.02	-9999	-38.38	0.64	619.489	-9999	-9999
2003	327	12600	13200	12900	51.5038	2.54	-39.57	-9999	-38.62	0.95	565.301	-9999	-9999
2003	327	13200	13800	13500	33.7005	3.33	-39.74	-9999	-38.32	1.42	542.22	-9999	-9999
2003	327	13800	14400	14100	27.5	4.17	-38.97	-9999	-38.2	0.77	459.154	-9999	-9999
2003	327	14400	15000	14700	24.5	4.61	-38.61	-9999	-38.08	0.53	392.353	-9999	-9999
2003	327	15000	15600	15300	24.9	4.29	-38.7	-9999	-38.05	0.65	403.613	-9999	-9999
2003	327	15600	16200	15900	25.2	4.3	-38.7	-9999	-38.14	0.56	402.962	-9999	-9999
2003	327	16200	16800	16500	26.1	4.24	-38.68	-9999	-38.21	0.47	404.294	-9999	-9999
2003	327	16800	17400	17100	24.6	4.25	-38.7	-9999	-38.13	0.57	411.199	-9999	-9999
2003	327	17400	18000	17700	19.4999	4.34	-38.69	-9999	-37.99	0.7	399.472	-9999	-9999
2003	327	18000	18600	18300	17.6	4.76	-38.58	-9999	-37.94	0.64	383.45	-9999	-9999
2003	327	18600	19200	18900	18.1	5.18	-38.51	-9999	-37.83	0.68	425.59	-9999	-9999
2003	327	19200	19800	19500	18	5.2	-38.52	-9999	-37.83	0.69	394.192	-9999	-9999
2003	327	19800	20400	20100	18.8	5.44	-38.5	-9999	-37.76	0.74	371.149	-9999	-9999
2003	327	20400	21000	20700	19.2	5.18	-38.51	-9999	-37.87	0.64	362.247	-9999	-9999
2003	327	21000	21600	21300	18.0001	5.34	-38.48	-9999	-37.89	0.59	370.649	-9999	-9999
2003	327	21600	22200	21900	18.8001	5.26	-38.3	-9999	-37.88	0.42	348.771	-9999	-9999
2003	327	22200	22800	22500	20.7	4.84	-38.51	-9999	-38.05	0.46	350.864	-9999	-9999
2003	327	22800	23400	23100	18.4	5.06	-38.56	-9999	-38.05	0.51	344.498	-9999	-9999
2003	327	23400	24000	23700	18.1	5.44	-38.46	-9999	-37.73	0.73	331.367	-9999	-9999
2003	327	24000	24600	24300	19	5.77	-38.39	-9999	-37.5	0.89	327.862	-9999	-9999
2003	327	24600	25200	24900	18.6	6.16	-38.35	-9999	-37.3	1.05	-9999	-9999	-9999
2003	327	25200	25800	25500	18.8	6.23	-38.31	-9999	-37.2	1.11	351.217	-9999	-9999
2003	327	25800	26400	26100	17.3002	6.15	-38.34	-9999	-37.21	1.13	342.383	-9999	-9999
2003	327	26400	27000	26700	13.6	6.19	-38.26	-9999	-37.24	1.02	324.853	-9999	-9999
2003	327	27000	27600	27300	13.3	5.9	-38.1	-9999	-37.4	0.7	323.913	-9999	-9999
2003	327	27600	28200	27900	13.5	5.61	-38.15	-9999	-37.68	0.47	321.058	-9999	-9999
2003	327	28200	28800	28500	13.9	5.72	-38.12	-9999	-37.57	0.55	316.408	-9999	-9999
2003	327	28800	29400	29100	15	5.7	-38.19	-9999	-37.36	0.83	311.498	-9999	-9999
2003	327	29400	30000	29700	14.4	5.44	-38.17	-9999	-37.37	0.8	315.231	-9999	-9999
2003	327	30000	30600	30300	14.4	5.49	-38.24	-9999	-37.32	0.92	322.223	-9999	-9999
2003	327	30600	31200	30900	13.3	5.6	-38.2	-9999	-37.37	0.83	312.522	-9999	-9999
2003	327	31200	31800	31500	13.3	5.4	-38.2	-9999	-37.5	0.7	309.009	-9999	-9999
2003	327	31800	32400	32100	14.7	5.06	-38.28	-9999	-37.65	0.63	-9999	-9999	-9999
2003	327	32400	33000	32700	13.7	5.18	-38.3	-9999	-37.59	0.71	-9999	-9999	-9999
2003	327	33000	33600	33300	12.6	5.27	-38.23	-9999	-37.47	0.76	310.49	-9999	-9999
2003	327	33600	34200	33900	12.6	5.12	-38.23	-9999	-37.35	0.88	308.756	-9999	-9999
2003	327	34200	34800	34500	13.4	5.13	-38.2	-9999	-37.33	0.87	300.382	-9999	-9999
2003	327	34800	35400	35100	12.7	5.28	-38.23	-9999	-37.17	1.06	296.943	-9999	-9999
2003	327	35400	36000	35700	14.7	5.25	-38.17	-9999	-37.29	0.88	301.465	-9999	-9999
2003	327	36000	36600	36300	15.4	5.6	-38.1	-9999	-37.22	0.88	-9999	-9999	-9999
2003	327	36600	37200	36900	15.4	5.49	-38.09	-9999	-37.2	0.89	-9999	-9999	-9999
2003	327	37200	37800	37500	15.4	5.39	-38.11	-9999	-37.16	0.95	325.857	-9999	-9999
2003	327	37800	38400	38100	14.2	5.48	-38.15	-9999	-37.14	1.01	318.851	-9999	-9999
2003	327	38400	39000	38700	12.8	5.3	-38.17	-9999	-37.21	0.96	319.042	-9999	-9999
2003	327	39000	39600	39300	14	5.47	-38.12	-9999	-37.19	0.93	323.409	-9999	-9999
2003	327	39600	40200	39900	15.4	5.4	-38.1	-9999	-37.11	0.99	337.113	-9999	-9999
2003	327	40200	40800	40500	13.4	5.32	-38.1	-9999	-37.12	0.98	339.276	-9999	-9999
2003	327	40800	41400	41100	14.5	5.32	-38.13	-9999	-37.05	1.08	339.053	-9999	-9999
2003	327	41400	42000	41700	15.4	5.32	-38.12	-9999	-37.05	1.07	339.224	-9999	-9999
2003	327	42000	42600	42300	15.5	5.08	-38.21	-9999	-37.05	1.16	345.674	-9999	-9999
2003	327	42600	43200	42900	13.9999	4.79	-38.32	-9999	-37.05	1.27	351.004	-9999	-9999
2003	327	43200	43800	43500	15.6	4.97	-38.17	-9999	-36.96	1.21	348.882	-9999	-9999
2003	327	43800	44400	44100	14	4.82	-38.18	-9999	-37.09	1.09	353.771	-9999	-9999
2003	327	44400	45000	44700	12.8	4.83	-38.27	-9999	-37.08	1.19	370.787	-9999	-9999
2003	327	45000	45600	45300	11.8	5.04	-37.92	-9999	-37.02	0.9	356.551	-9999	-9999
2003	327	45600	46200	45900	13.3	4.9	-37.96	-9999	-37.16	0.8	358.127	-9999	-9999
2003	327	46200	46800	46500	15	5.18571	-37.9571	-9999	-37.0286	0.928571	355.143	-9999	-9999
2003	327	46800	47400	47100	18.1	5.05	-37.96	-9999	-37.11	0.85	350.636	-9999	-9999
2003	327	47400	48000	47700	17.6	5.07	-37.9	-9999	-37.06	0.84	348.218	-9999	-9999
2003	327	48000	48600	48300	17.8	5.09	-37.85	-9999	-36.98	0.87	341.018	-9999	-9999
2003	327	48600	49200	48900	19.4	5.2	-37.72	-9999	-36.84	0.88	336.093	-9999	-9999
2003	327	49200	49800	49500	21.9	4.58	-37.8	-9999	-36.9	0.9	352.318	-9999	-9999
2003	327	49800	50400	50100	30.6967	3.65	-37.86	-9999	-37.11	0.75	374.339	-9999	-9999
2003	327	50400	51000	50700	57.6903	2.48	-38.3	-9999	-37.73	0.57	411.302	-9999	-9999
2003	327	51000	51600	51300	66.9042	2.8	-38.56	-9999	-38.04	0.52	384.724	-9999	-9999
2003	327	51600	52200	51900	59.2007	2.33	-38.29	-9999	-37.91	0.38	376.398	-9999	-9999
2003	327	52200	52800	52500	39.4919	3.08	-38.06	-9999	-37.61	0.45	374.778	-9999	-9999
2003	327	52800	53400	53100	23.3991	4.09	-37.83	-9999	-37.2	0.63	352.358	-9999	-9999
2003	327	53400	54000	53700	23	4.19	-37.8	-9999	-37.06	0.74	356.632	-9999	-9999
2003	327	54000	54600	54300	21.3	4.58	-37.66	-9999	-36.91	0.75	-9999	-9999	-9999
2003	327	54600	55200	54900	21.1	4.59	-37.56	-9999	-36.84	0.72	358.879	-9999	-9999
2003	327	55200	55800	55500	30.2967	3.91	-37.64	-9999	-37.13	0.51	353.051	-9999	-9999
2003	327	55800	56400	56100	31.998	3.69	-37.8	-9999	-37.31	0.49	381.724	-9999	-9999
2003	327	56400	57000	56700	37.1007	3.52	-37.8	-9999	-37.22	0.58	404.067	-9999	-9999
2003	327	57000	57600	57300	43.2	2.9	-37.87	-9999	-37.35	0.52	440.084	-9999	-9999
2003	327	57600	58200	57900	44.8994	2.69	-37.83	-9999	-37.41	0.42	433.633	-9999	-9999
2003	327	58200	58800	58500	58.7672	1.97	-38.4	-9999	-37.69	0.71	585.722	-9999	-9999
2003	327	58800	59400	59100	47.4368	2.06	-38.87	-9999	-37.67	1.2	483.244	-9999	-9999
2003	327	59400	60000	59700	38.6008	2.48	-38.51	-9999	-37.46	1.05	463.347	-9999	-9999
2003	327	60000	60600	60300	32.8998	2.87	-38.08	-9999	-37.14	0.94	438.511	-9999	-9999
2003	327	60600	61200	60900	52.3147	2.42	-38.29	-9999	-37.47	0.82	516.942	-9999	-9999
2003	327	61200	61800	61500	47.4996	2.35	-39.23	-9999	-37.54	1.69	517.86	-9999	-9999
2003	327	61800	62400	62100	49.7004	2.24	-38.84	-9999	-37.6	1.24	605.293	-9999	-9999
2003	327	62400	63000	62700	66.857	1.82	-39.44	-9999	-38.17	1.27	734.119	-9999	-9999
2003	327	63000	63600	63300	78.9054	1.94	-39.69	-9999	-38.32	1.37	766.042	-9999	-9999
2003	327	63600	64200	63900	73.9909	2.09	-39.6	-9999	-38.08	1.52	774.263	-9999	-9999
2003	327	64200	64800	64500	80.6999	2.58	-39.79	-9999	-38.38	1.41	800.489	-9999	-9999
2003	327	64800	65400	65100	75.5	2.59	-39.72	-9999	-38.04	1.68	776.655	-9999	-9999
2003	327	65400	66000	65700	66.9002	2.94	-39.6	-9999	-38.03	1.57	748.604	-9999	-9999
2003	327	66000	66600	66300	67.1003	3.4	-39.63	-9999	-37.76	1.87	752.713	-9999	-9999
2003	327	66600	67200	66900	64.4998	3.4375	-39.5	-9999	-37.2875	2.2125	739.213	-9999	-9999
2003	327	67200	67800	67500	61.1113	3.22222	-39.4778	-9999	-36.9667	2.51111	733.451	-9999	-9999
2003	327	67800	68400	68100	62.2998	3.18	-39.55	-9999	-37.93	1.62	737.003	-9999	-9999
2003	327	68400	69000	68700	58.6	3.33	-39.47	-9999	-38.2	1.27	717.46	-9999	-9999
2003	327	69000	69600	69300	57.9	3.74	-39.3	-9999	-37.7	1.6	695.996	-9999	-9999
2003	327	69600	70200	69900	54.8	3.84	-39.17	-9999	-36.33	2.84	682.522	-9999	-9999
2003	327	70200	70800	70500	65.6986	2.98	-39.1	-9999	-36.99	2.11	691.96	-9999	-9999
2003	327	70800	71400	71100	72.5998	2.82	-39.23	-9999	-37.95	1.28	708.067	-9999	-9999
2003	327	71400	72000	71700	64.9	3.36	-39.22	-9999	-37.66	1.56	715.767	-9999	-9999
2003	327	72000	72600	72300	64.7	3.1	-39.25	-9999	-38.01	1.24	-9999	-9999	-9999
2003	327	72600	73200	72900	63.0005	3.23	-39.25	-9999	-38.19	1.06	790.856	-9999	-9999
2003	327	73200	73800	73500	67.1	2.69	-39.33	-9999	-38.26	1.07	787.104	-9999	-9999
2003	327	73800	74400	74100	64.4988	2.81	-39.41	-9999	-37.1	2.31	791.294	-9999	-9999
2003	327	74400	75000	74700	82.387	2.35	-39.77	-9999	-38.27	1.5	882.027	-9999	-9999
2003	327	75000	75600	75300	74.3334	2.74444	-39.99	-9999	-37.07	2.92	916.592	-9999	-9999
2003	327	75600	76200	75900	75.4002	2.82	-39.93	-9999	-37.17	2.76	896.991	-9999	-9999
2003	327	76200	76800	76500	70.0997	3.17	-39.87	-9999	-36.16	3.71	862.436	-9999	-9999
2003	327	76800	77400	77100	76.7998	3.17	-39.92	-9999	-36.69	3.23	875.61	-9999	-9999
2003	327	77400	78000	77700	77.7	3.05	-40.06	-9999	-37.21	2.85	856.418	-9999	-9999
2003	327	78000	78600	78300	75.9	3.33	-40.03	-9999	-37.66	2.37	822.847	-9999	-9999
2003	327	78600	79200	78900	85.0994	3.21	-39.95	-9999	-38.73	1.22	845.123	-9999	-9999
2003	327	79200	79800	79500	90.6	3.36	-40.18	-9999	-38.68	1.5	890.329	-9999	-9999
2003	327	79800	80400	80100	88.7002	3.36	-40.17	-9999	-38.72	1.45	897.929	-9999	-9999
2003	327	80400	81000	80700	84.1	2.94	-40.2	-9999	-38.72	1.48	870.536	-9999	-9999
2003	327	81000	81600	81300	85.9	2.56	-40.3	-9999	-38.9	1.4	855.557	-9999	-9999
2003	327	81600	82200	81900	86.6001	2.62	-40.56	-9999	-39.14	1.42	823.781	-9999	-9999
2003	327	82200	82800	82500	82.8335	3.05	-40.85	-9999	-38.8833	1.96667	730.2	-9999	-9999
2003	327	82800	83400	83100	81.7	3.38	-41.48	-9999	-38.67	2.81	584.656	-9999	-9999
2003	327	83400	84000	83700	79.6	3.63	-41.93	-9999	-38.72	3.21	371.489	-9999	-9999
2003	327	84000	84600	84300	83.0997	3.61	-42.56	-9999	-38.71	3.85	344.86	-9999	-9999
2003	327	84600	85200	84900	87.9	3.46	-43.07	-9999	-38.73	4.34	567.591	-9999	-9999
2003	327	85200	85800	85500	88.9	3.6	-42.94	-9999	-38.65	4.29	707.797	-9999	-9999
2003	327	85800	86400	86100	87.7998	3.39	-42.83	-9999	-38.45	4.38	772.388	-9999	-9999
2003	328	0	600	300	96	3.05	-9999	-9999	-38.35	-9999	816.942	-9999	-9999
2003	328	600	1200	900	95.1	2.99	-42.7	-9999	-38.33	4.42	837.67	-9999	-9999
2003	328	1200	1800	1500	93.1003	3.33	-42.7	-9999	-38.32	4.38	823.582	-9999	-9999
2003	328	1800	2400	2100	90.5	3.2	-42.26	-9999	-38.34	3.92	843.223	-9999	-9999
2003	328	2400	3000	2700	91	2.91	-41.99	-9999	-38.49	3.5	853.144	-9999	-9999
2003	328	3000	3600	3300	94.3	2.54	-41.83	-9999	-38.96	2.87	855.293	-9999	-9999
2003	328	3600	4200	3900	102.401	2.2	-41.58	-9999	-39.18	2.4	-9999	-9999	-9999
2003	328	4200	4800	4500	101.5	2.12	-41.66	-9999	-39.19	2.47	858.977	-9999	-9999
2003	328	4800	5400	5100	101.5	2.06	-41.25	-9999	-38.91	2.34	851.759	-9999	-9999
2003	328	5400	6000	5700	102.3	2.03	-41.29	-9999	-38.87	2.42	813.751	-9999	-9999
2003	328	6000	6600	6300	112.1	2.11	-40.91	-9999	-39.6	1.31	830.176	-9999	-9999
2003	328	6600	7200	6900	115.8	2.02	-40.71	-9999	-40.13	0.58	834.282	-9999	-9999
2003	328	7200	7800	7500	115.9	2.1	-40.96	-9999	-40.06	0.9	814.224	-9999	-9999
2003	328	7800	8400	8100	115.3	2.15	-40.83	-9999	-40.19	0.64	809.989	-9999	-9999
2003	328	8400	9000	8700	113.1	2.09	-40.91	-9999	-40.12	0.79	765.011	-9999	-9999
2003	328	9000	9600	9300	113	2.2	-40.76	-9999	-40.03	0.73	769.656	-9999	-9999
2003	328	9600	10200	9900	113	2.27	-40.93	-9999	-40.12	0.81	750.249	-9999	-9999
2003	328	10200	10800	10500	113.3	2.15	-40.87	-9999	-40.04	0.83	770.276	-9999	-9999
2003	328	10800	11400	11100	117.9	2.06	-40.81	-9999	-40.01	0.8	809.529	-9999	-9999
2003	328	11400	12000	11700	119	2.05	-40.62	-9999	-39.89	0.73	770.833	-9999	-9999
2003	328	12000	12600	12300	121.399	2.1	-40.23	-9999	-39.8	0.43	763.933	-9999	-9999
2003	328	12600	13200	12900	125.9	2.26	-39.94	-9999	-39.82	0.12	760.472	-9999	-9999
2003	328	13200	13800	13500	135.803	2.21	-39.89	-9999	-39.97	-0.08	783.011	-9999	-9999
2003	328	13800	14400	14100	136.9	2.23	-39.81	-9999	-39.93	-0.12	796.738	-9999	-9999
2003	328	14400	15000	14700	144.602	2.12	-39.9	-9999	-40.01	-0.11	805.798	-9999	-9999
2003	328	15000	15600	15300	139.375	2.4375	-40.075	-9999	-40.1625	-0.0875	854.309	-9999	-9999
2003	328	15600	16200	15900	136.1	2.42	-40.28	-9999	-40.12	0.16	899.287	-9999	-9999
2003	328	16200	16800	16500	133.9	2.55	-40.34	-9999	-40.16	0.18	906.693	-9999	-9999
2003	328	16800	17400	17100	137.4	2.78	-40.27	-9999	-40.18	0.09	890.317	-9999	-9999
2003	328	17400	18000	17700	137.9	3.1	-40.33	-9999	-40.15	0.18	889.123	-9999	-9999
2003	328	18000	18600	18300	135.8	3.2	-40.39	-9999	-40.19	0.2	901.513	-9999	-9999
2003	328	18600	19200	18900	133.4	3.22	-40.53	-9999	-40.16	0.37	909.987	-9999	-9999
2003	328	19200	19800	19500	133.6	3.11	-40.45	-9999	-40.16	0.29	900.339	-9999	-9999
2003	328	19800	20400	20100	129.7	3.09	-40.49	-9999	-40.1	0.39	890.693	-9999	-9999
2003	328	20400	21000	20700	128.222	3.1	-40.45	-9999	-40.04	0.41	877.967	-9999	-9999
2003	328	21000	21600	21300	125.1	3.03	-40.4	-9999	-39.82	0.58	859.412	-9999	-9999
2003	328	21600	22200	21900	122.2	3.06	-40.39	-9999	-39.8	0.59	-9999	-9999	-9999
2003	328	22200	22800	22500	124	3.32	-40.39	-9999	-39.77	0.62	894.03	-9999	-9999
2003	328	22800	23400	23100	123	3.53	-40.33	-9999	-39.64	0.69	850.898	-9999	-9999
2003	328	23400	24000	23700	122.9	3.53	-40.3	-9999	-39.7	0.6	827.258	-9999	-9999
2003	328	24000	24600	24300	125.2	3.47	-40.21	-9999	-39.74	0.47	812.162	-9999	-9999
2003	328	24600	25200	24900	125.9	3.28	-40.16	-9999	-39.62	0.54	799.696	-9999	-9999
2003	328	25200	25800	25500	129	3.15	-40.03	-9999	-39.63	0.4	798.971	-9999	-9999
2003	328	25800	26400	26100	131.4	3.03	-39.85	-9999	-39.67	0.18	801.127	-9999	-9999
2003	328	26400	27000	26700	130.8	2.79	-39.85	-9999	-39.74	0.11	817.624	-9999	-9999
2003	328	27000	27600	27300	132	2.67	-39.84	-9999	-39.8	0.04	843.2	-9999	-9999
2003	328	27600	28200	27900	132.9	2.55	-39.9	-9999	-39.94	-0.04	872.58	-9999	-9999
2003	328	28200	28800	28500	132.3	2.73	-39.9	-9999	-39.86	0.04	884.38	-9999	-9999
2003	328	28800	29400	29100	131.2	2.57	-39.86	-9999	-39.82	0.04	887.316	-9999	-9999
2003	328	29400	30000	29700	132.1	2.9	-39.83	-9999	-39.65	0.18	879.498	-9999	-9999
2003	328	30000	30600	30300	129	3.17	-39.93	-9999	-39.55	0.38	868.88	-9999	-9999
2003	328	30600	31200	30900	123.2	3.24	-39.99	-9999	-39.43	0.56	853.049	-9999	-9999
2003	328	31200	31800	31500	121.1	3.25	-39.92	-9999	-39.22	0.7	840.571	-9999	-9999
2003	328	31800	32400	32100	124.875	3.2125	-39.925	-9999	-39.325	0.6	842.229	-9999	-9999
2003	328	32400	33000	32700	126	3.22222	-39.9778	-9999	-39.3	0.677778	843.909	-9999	-9999
2003	328	33000	33600	33300	129.8	3.38	-39.82	-9999	-39.15	0.67	830.373	-9999	-9999
2003	328	33600	34200	33900	134.3	3.24	-39.65	-9999	-39.24	0.41	846.038	-9999	-9999
2003	328	34200	34800	34500	129.1	3.45	-39.78	-9999	-39.14	0.64	835.323	-9999	-9999
2003	328	34800	35400	35100	122.5	3.45	-39.91	-9999	-39.06	0.85	821.164	-9999	-9999
2003	328	35400	36000	35700	120.7	3.53	-39.9	-9999	-38.89	1.01	805.349	-9999	-9999
2003	328	36000	36600	36300	123.3	3.59	-39.86	-9999	-38.8	1.06	808.624	-9999	-9999
2003	328	36600	37200	36900	124.7	3.83	-39.87	-9999	-38.89	0.98	807.889	-9999	-9999
2003	328	37200	37800	37500	123.6	3.73	-39.89	-9999	-38.86	1.03	801.349	-9999	-9999
2003	328	37800	38400	38100	124.6	3.61	-39.88	-9999	-38.99	0.89	801.559	-9999	-9999
2003	328	38400	39000	38700	120.8	3.6	-39.9	-9999	-38.91	0.99	793.936	-9999	-9999
2003	328	39000	39600	39300	117.9	3.34	-39.8	-9999	-38.67	1.13	776.84	-9999	-9999
2003	328	39600	40200	39900	118.6	3.15	-39.73	-9999	-38.6	1.13	-9999	-9999	-9999
2003	328	40200	40800	40500	123.8	3.24	-39.78	-9999	-38.74	1.04	817.167	-9999	-9999
2003	328	40800	41400	41100	129.8	3.12	-39.43	-9999	-38.91	0.52	797.124	-9999	-9999
2003	328	41400	42000	41700	132.1	3.09	-39.31	-9999	-39.08	0.23	767.971	-9999	-9999
2003	328	42000	42600	42300	130.9	3.25	-39.35	-9999	-39.14	0.21	757.622	-9999	-9999
2003	328	42600	43200	42900	127.4	3.79	-39.53	-9999	-38.89	0.64	758.044	-9999	-9999
2003	328	43200	43800	43500	126.4	3.7	-39.59	-9999	-38.88	0.71	776.118	-9999	-9999
2003	328	43800	44400	44100	124.6	3.56	-39.6	-9999	-38.9	0.7	776.087	-9999	-9999
2003	328	44400	45000	44700	123.2	3.96	-39.5	-9999	-38.88	0.62	769.24	-9999	-9999
2003	328	45000	45600	45300	121.4	3.96	-39.5	-9999	-38.87	0.63	768.154	-9999	-9999
2003	328	45600	46200	45900	119.8	3.81	-39.61	-9999	-39.01	0.6	783.541	-9999	-9999
2003	328	46200	46800	46500	115.4	3.54	-39.61	-9999	-39.01	0.6	784.629	-9999	-9999
2003	328	46800	47400	47100	116.2	3.42	-39.52	-9999	-38.91	0.61	757.587	-9999	-9999
2003	328	47400	48000	47700	120.7	3.38	-39.52	-9999	-38.98	0.54	753.828	-9999	-9999
2003	328	48000	48600	48300	123.2	3.17	-39.53	-9999	-38.8	0.73	755.124	-9999	-9999
2003	328	48600	49200	48900	125.2	3.2	-39.37	-9999	-38.65	0.72	751.558	-9999	-9999
2003	328	49200	49800	49500	119.2	3.28	-39.32	-9999	-38.73	0.59	738.559	-9999	-9999
2003	328	49800	50400	50100	118.2	3.43	-39.25	-9999	-38.72	0.53	737.284	-9999	-9999
2003	328	50400	51000	50700	121	3.43	-39.46	-9999	-38.78	0.68	758.511	-9999	-9999
2003	328	51000	51600	51300	123.8	3.68	-39.4	-9999	-38.75	0.65	752.831	-9999	-9999
2003	328	51600	52200	51900	124.2	3.76	-39.3	-9999	-38.73	0.57	739.731	-9999	-9999
2003	328	52200	52800	52500	121.6	3.68	-39.3	-9999	-38.79	0.51	736.431	-9999	-9999
2003	328	52800	53400	53100	117.8	3.46	-39.25	-9999	-38.7	0.55	734.104	-9999	-9999
2003	328	53400	54000	53700	118.8	3.4	-39.29	-9999	-38.66	0.63	735.227	-9999	-9999
2003	328	54000	54600	54300	116.6	3.54	-39.19	-9999	-38.62	0.57	734.219	-9999	-9999
2003	328	54600	55200	54900	116.4	3.77	-39.04	-9999	-38.63	0.41	734.291	-9999	-9999
2003	328	55200	55800	55500	116.7	3.86	-39.05	-9999	-38.7	0.35	741.12	-9999	-9999
2003	328	55800	56400	56100	115.5	3.82	-39.06	-9999	-38.78	0.28	759.198	-9999	-9999
2003	328	56400	57000	56700	115.4	3.8	-39.1	-9999	-38.8	0.3	772.173	-9999	-9999
2003	328	57000	57600	57300	114.8	3.86	-39.1	-9999	-38.79	0.31	784.588	-9999	-9999
2003	328	57600	58200	57900	114.5	3.95	-39.1	-9999	-38.8	0.3	-9999	-9999	-9999
2003	328	58200	58800	58500	119.2	3.86	-39.17	-9999	-38.81	0.36	864.303	-9999	-9999
2003	328	58800	59400	59100	120.3	4.07	-39.23	-9999	-38.8	0.43	851.364	-9999	-9999
2003	328	59400	60000	59700	118.6	4.09	-39.2	-9999	-38.8	0.4	845.529	-9999	-9999
2003	328	60000	60600	60300	120.7	4.18	-39.26	-9999	-38.81	0.45	843.72	-9999	-9999
2003	328	60600	61200	60900	121.7	4.31	-39.2	-9999	-38.9	0.3	846.572	-9999	-9999
2003	328	61200	61800	61500	123.7	4.38	-39.21	-9999	-38.95	0.26	854.209	-9999	-9999
2003	328	61800	62400	62100	123	4.4	-39.29	-9999	-39	0.29	864.902	-9999	-9999
2003	328	62400	63000	62700	123.6	4.46	-39.3	-9999	-39.06	0.24	881.12	-9999	-9999
2003	328	63000	63600	63300	120.8	4.45	-39.28	-9999	-39.1	0.18	891.56	-9999	-9999
2003	328	63600	64200	63900	117.9	4.46	-39.28	-9999	-39.09	0.19	900.522	-9999	-9999
2003	328	64200	64800	64500	114	4.73	-39.2	-9999	-39	0.2	905.02	-9999	-9999
2003	328	64800	65400	65100	112.5	4.73	-39.2	-9999	-39	0.2	907.516	-9999	-9999
2003	328	65400	66000	65700	113.5	4.68	-39.2	-9999	-39	0.2	899.249	-9999	-9999
2003	328	66000	66600	66300	113.7	4.54	-39.12	-9999	-38.98	0.14	885.416	-9999	-9999
2003	328	66600	67200	66900	113.7	4.28	-39.13	-9999	-38.97	0.16	888.558	-9999	-9999
2003	328	67200	67800	67500	117.2	4.33	-39.18	-9999	-38.9	0.28	887.356	-9999	-9999
2003	328	67800	68400	68100	116.9	4.07	-39.2	-9999	-38.95	0.25	886.956	-9999	-9999
2003	328	68400	69000	68700	118.3	4.3	-39.19	-9999	-38.92	0.27	887.64	-9999	-9999
2003	328	69000	69600	69300	116.5	4.4	-39.16	-9999	-38.84	0.32	891.636	-9999	-9999
2003	328	69600	70200	69900	117.2	4.29	-39.09	-9999	-38.8	0.29	892.403	-9999	-9999
2003	328	70200	70800	70500	116	4.18	-39.12	-9999	-38.82	0.3	891.332	-9999	-9999
2003	328	70800	71400	71100	116.2	4.15	-39.13	-9999	-38.82	0.31	898.7	-9999	-9999
2003	328	71400	72000	71700	113.4	4.16	-39.16	-9999	-38.8	0.36	893.624	-9999	-9999
2003	328	72000	72600	72300	110.8	4.07	-39.13	-9999	-38.86	0.27	884.158	-9999	-9999
2003	328	72600	73200	72900	110.1	3.82	-39.18	-9999	-38.9	0.28	884.929	-9999	-9999
2003	328	73200	73800	73500	113.6	3.92	-39.2	-9999	-38.98	0.22	887.069	-9999	-9999
2003	328	73800	74400	74100	113.3	4.15	-39.25	-9999	-38.91	0.34	896.351	-9999	-9999
2003	328	74400	75000	74700	112.2	4.11	-39.25	-9999	-38.87	0.38	887.938	-9999	-9999
2003	328	75000	75600	75300	113.7	3.87	-39.22	-9999	-38.93	0.29	880.956	-9999	-9999
2003	328	75600	76200	75900	112.3	4.16	-39.2	-9999	-38.87	0.33	-9999	-9999	-9999
2003	328	76200	76800	76500	110.1	4.1	-39.17	-9999	-38.84	0.33	914.576	-9999	-9999
2003	328	76800	77400	77100	109.8	3.8	-39.1	-9999	-38.9	0.2	890.711	-9999	-9999
2003	328	77400	78000	77700	112.9	3.83	-39.2	-9999	-38.96	0.24	870.443	-9999	-9999
2003	328	78000	78600	78300	116.3	3.7	-39.25	-9999	-38.9	0.35	880.182	-9999	-9999
2003	328	78600	79200	78900	118.4	3.7	-39.27	-9999	-39	0.27	871.466	-9999	-9999
2003	328	79200	79800	79500	120.5	4.05	-39.36	-9999	-39.07	0.29	876.89	-9999	-9999
2003	328	79800	80400	80100	116	3.98	-39.28	-9999	-39	0.28	874.402	-9999	-9999
2003	328	80400	81000	80700	113.8	3.75	-39.27	-9999	-39.01	0.26	863.311	-9999	-9999
2003	328	81000	81600	81300	109	3.9	-39.18	-9999	-38.98	0.2	859.687	-9999	-9999
2003	328	81600	82200	81900	108.5	4.19	-39.07	-9999	-38.9	0.17	853.138	-9999	-9999
2003	328	82200	82800	82500	108.8	4.23	-38.97	-9999	-38.8	0.17	842.407	-9999	-9999
2003	328	82800	83400	83100	107.75	3.775	-38.98	-9999	-38.75	0.23	832.267	-9999	-9999
2003	328	83400	84000	83700	105.3	3.56	-38.96	-9999	-38.66	0.3	833.504	-9999	-9999
2003	328	84000	84600	84300	107.2	3.56	-39.04	-9999	-38.67	0.37	836.562	-9999	-9999
2003	328	84600	85200	84900	104.1	3.4	-39.02	-9999	-38.6	0.42	838.94	-9999	-9999
2003	328	85200	85800	85500	100.7	3.1	-39	-9999	-38.6	0.4	828.684	-9999	-9999
2003	328	85800	86400	86100	108.3	3.48	-39.03	-9999	-38.7	0.33	822.033	-9999	-9999
2003	329	0	600	300	110.8	3.56	-39	-9999	-38.7	0.3	825.116	-9999	-9999
2003	329	600	1200	900	108.6	3.56	-39	-9999	-38.62	0.38	833.554	-9999	-9999
2003	329	1200	1800	1500	108.6	3.57	-39	-9999	-38.5	0.5	820.236	-9999	-9999
2003	329	1800	2400	2100	107.2	3.54	-38.94	-9999	-38.5	0.44	822.162	-9999	-9999
2003	329	2400	3000	2700	106.9	3.56	-38.8	-9999	-38.5	0.3	815.409	-9999	-9999
2003	329	3000	3600	3300	103.8	3.26	-38.8	-9999	-38.5	0.3	811.347	-9999	-9999
2003	329	3600	4200	3900	99.6992	3.19	-38.7	-9999	-38.54	0.16	804.902	-9999	-9999
2003	329	4200	4800	4500	95.1	3.16	-38.7	-9999	-38.45	0.25	792.967	-9999	-9999
2003	329	4800	5400	5100	97.8998	3.16	-38.58	-9999	-38.4	0.18	784.483	-9999	-9999
2003	329	5400	6000	5700	102.3	3.21	-38.7	-9999	-38.46	0.24	785.499	-9999	-9999
2003	329	6000	6600	6300	103.3	3.21	-38.7	-9999	-38.5	0.2	785.009	-9999	-9999
2003	329	6600	7200	6900	101.1	3.19	-38.52	-9999	-38.36	0.16	783.688	-9999	-9999
2003	329	7200	7800	7500	102.6	3.45	-38.52	-9999	-38.36	0.16	-9999	-9999	-9999
2003	329	7800	8400	8100	100.2	3.55	-38.5	-9999	-38.24	0.26	818.909	-9999	-9999
2003	329	8400	9000	8700	97.8999	3.23	-38.5	-9999	-38.2	0.3	800.609	-9999	-9999
2003	329	9000	9600	9300	96.9	3.35	-38.49	-9999	-38.2	0.29	778.467	-9999	-9999
2003	329	9600	10200	9900	96.5	3.11	-38.44	-9999	-38.2	0.24	762.438	-9999	-9999
2003	329	10200	10800	10500	98.6999	3.31	-38.41	-9999	-38.2	0.21	750.584	-9999	-9999
2003	329	10800	11400	11100	100.5	2.96	-38.4	-9999	-38.2	0.2	749.898	-9999	-9999
2003	329	11400	12000	11700	100.4	2.67	-38.43	-9999	-38.2	0.23	751.911	-9999	-9999
2003	329	12000	12600	12300	98.3	2.9	-38.32	-9999	-38.12	0.2	743.982	-9999	-9999
2003	329	12600	13200	12900	99.9	2.86	-38.4	-9999	-38.18	0.22	754.653	-9999	-9999
2003	329	13200	13800	13500	98.2001	3.15	-38.2	-9999	-38.02	0.18	747.68	-9999	-9999
2003	329	13800	14400	14100	98.7002	3.01	-38.22	-9999	-38	0.22	751.553	-9999	-9999
2003	329	14400	15000	14700	101.2	3.29	-38.26	-9999	-38	0.26	761.156	-9999	-9999
2003	329	15000	15600	15300	94.4997	2.96	-38.32	-9999	-38.02	0.3	771.824	-9999	-9999
2003	329	15600	16200	15900	92.4002	2.8	-38.38	-9999	-38	0.38	768.593	-9999	-9999
2003	329	16200	16800	16500	89.5998	2.81	-38.3	-9999	-38.02	0.28	767.287	-9999	-9999
2003	329	16800	17400	17100	94.3	2.99	-38.26	-9999	-38	0.26	764.853	-9999	-9999
2003	329	17400	18000	17700	90.2	3.29	-38.2	-9999	-37.93	0.27	757.236	-9999	-9999
2003	329	18000	18600	18300	87.8333	3.46667	-38.2	-9999	-37.9	0.3	762.107	-9999	-9999
2003	329	18600	19200	18900	86.4001	3.6	-38.22	-9999	-37.86	0.36	763.473	-9999	-9999
2003	329	19200	19800	19500	87.7007	3.38	-38.36	-9999	-37.9	0.46	768.151	-9999	-9999
2003	329	19800	20400	20100	95.2997	3.39	-38.41	-9999	-37.93	0.48	777.287	-9999	-9999
2003	329	20400	21000	20700	106.201	3.59	-38.5	-9999	-38	0.5	794.143	-9999	-9999
2003	329	21000	21600	21300	108.7	3.72	-38.5	-9999	-38.2	0.3	804.271	-9999	-9999
2003	329	21600	22200	21900	104.1	3.41	-38.5	-9999	-38.08	0.42	807.827	-9999	-9999
2003	329	22200	22800	22500	100.9	3.41	-38.5	-9999	-38	0.5	801.504	-9999	-9999
2003	329	22800	23400	23100	100.4	3.36	-38.5	-9999	-38	0.5	797.746	-9999	-9999
2003	329	23400	24000	23700	96.6999	3.31	-38.5	-9999	-38	0.5	798.767	-9999	-9999
2003	329	24000	24600	24300	85.6996	3.25	-38.5	-9999	-38	0.5	801.507	-9999	-9999
2003	329	24600	25200	24900	83.6	3.33	-38.5	-9999	-38	0.5	797.487	-9999	-9999
2003	329	25200	25800	25500	81.9	3.36	-38.44	-9999	-38	0.44	-9999	-9999	-9999
2003	329	25800	26400	26100	80.8	3.41	-38.42	-9999	-38	0.42	854.697	-9999	-9999
2003	329	26400	27000	26700	86.4998	3.36	-38.48	-9999	-38	0.48	840.118	-9999	-9999
2003	329	27000	27600	27300	88.1005	3.28	-38.5	-9999	-38	0.5	835.331	-9999	-9999
2003	329	27600	28200	27900	86.9001	3.4	-38.5	-9999	-38	0.5	841.647	-9999	-9999
2003	329	28200	28800	28500	86.2	3.37	-38.5	-9999	-38	0.5	839.002	-9999	-9999
2003	329	28800	29400	29100	86.4	3.44	-38.5	-9999	-38	0.5	836.898	-9999	-9999
2003	329	29400	30000	29700	82.8999	3.24	-38.5	-9999	-38.02	0.48	849.318	-9999	-9999
2003	329	30000	30600	30300	77.6	3.09	-38.68	-9999	-38.2	0.48	858.973	-9999	-9999
2003	329	30600	31200	30900	77.6999	2.8	-38.7	-9999	-38.08	0.62	872.32	-9999	-9999
2003	329	31200	31800	31500	81.9	3.07	-38.7	-9999	-38	0.7	881.544	-9999	-9999
2003	329	31800	32400	32100	82.7	3.04	-38.7	-9999	-38	0.7	901.018	-9999	-9999
2003	329	32400	33000	32700	82.2999	3.01	-38.7	-9999	-37.98	0.72	905.364	-9999	-9999
2003	329	33000	33600	33300	81.1002	3.17	-38.8	-9999	-37.98	0.82	913.993	-9999	-9999
2003	329	33600	34200	33900	76.7	3.24	-38.9	-9999	-38	0.9	907.601	-9999	-9999
2003	329	34200	34800	34500	74.7	3.13	-38.9	-9999	-38	0.9	914.59	-9999	-9999
2003	329	34800	35400	35100	76.4	3.2	-38.92	-9999	-38.06	0.86	929.849	-9999	-9999
2003	329	35400	36000	35700	80.5	2.86	-38.93	-9999	-38.14	0.79	936.94	-9999	-9999
2003	329	36000	36600	36300	79.9001	2.73	-39	-9999	-38.2	0.8	933.947	-9999	-9999
2003	329	36600	37200	36900	75.7	2.76	-39	-9999	-38.2	0.8	863.191	-9999	-9999
2003	329	37200	37800	37500	67.2996	2.67	-39.06	-9999	-38.16	0.9	872.631	-9999	-9999
2003	329	37800	38400	38100	60	2.57	-39.06	-9999	-38.2	0.86	822.604	-9999	-9999
2003	329	38400	39000	38700	61.2999	2.36	-39.06	-9999	-38.24	0.82	736.544	-9999	-9999
2003	329	39000	39600	39300	61.1	2.39	-39	-9999	-38.22	0.78	824.129	-9999	-9999
2003	329	39600	40200	39900	56.9999	2.68	-38.98	-9999	-38.2	0.78	915.962	-9999	-9999
2003	329	40200	40800	40500	53.5	2.81667	-38.8429	-9999	-38.2	0.642857	898.104	-9999	-9999
2003	329	40800	41400	41100	53.4999	2.8	-38.7	-9999	-38.2	0.5	866.153	-9999	-9999
2003	329	41400	42000	41700	56.2	2.76	-38.7	-9999	-38.2	0.5	864.636	-9999	-9999
2003	329	42000	42600	42300	53.7	2.79	-38.58	-9999	-38.2	0.38	864.329	-9999	-9999
2003	329	42600	43200	42900	52.3001	2.85	-38.5	-9999	-38.2	0.3	850.179	-9999	-9999
2003	329	43200	43800	43500	45.9999	3.15	-38.5	-9999	-38.2	0.3	-9999	-9999	-9999
2003	329	43800	44400	44100	38.4995	3.51	-38.49	-9999	-38.08	0.41	804.803	-9999	-9999
2003	329	44400	45000	44700	36.2	3.39	-38.4	-9999	-38	0.4	770.053	-9999	-9999
2003	329	45000	45600	45300	33.7	3.39	-38.3	-9999	-38	0.3	749.8	-9999	-9999
2003	329	45600	46200	45900	30.5	3.78	-38.2	-9999	-38	0.2	743.458	-9999	-9999
2003	329	46200	46800	46500	27.9	3.95	-38	-9999	-38	0	723.671	-9999	-9999
2003	329	46800	47400	47100	24.4999	3.97	-37.99	-9999	-37.86	0.13	699.682	-9999	-9999
2003	329	47400	48000	47700	24.4	3.76	-37.9	-9999	-37.84	0.06	687.491	-9999	-9999
2003	329	48000	48600	48300	24.1	3.87	-37.88	-9999	-37.9	-0.02	690.136	-9999	-9999
2003	329	48600	49200	48900	23	4.2	-37.85	-9999	-37.91	-0.06	684.802	-9999	-9999
2003	329	49200	49800	49500	20.1	4.29	-37.99	-9999	-37.99	0	672.818	-9999	-9999
2003	329	49800	50400	50100	20.6999	4.22	-38.08	-9999	-38	0.08	677.571	-9999	-9999
2003	329	50400	51000	50700	22.1999	4.06	-38.06	-9999	-37.94	0.12	681.584	-9999	-9999
2003	329	51000	51600	51300	19	4.11	-37.96	-9999	-37.82	0.14	653.607	-9999	-9999
2003	329	51600	52200	51900	16.4999	3.92	-38	-9999	-37.97	0.03	655.851	-9999	-9999
2003	329	52200	52800	52500	11.8	4.15	-37.78	-9999	-37.92	-0.14	653.429	-9999	-9999
2003	329	52800	53400	53100	11.5	4.59	-37.66	-9999	-37.9	-0.24	633.324	-9999	-9999
2003	329	53400	54000	53700	14.6	4.8	-37.54	-9999	-37.86	-0.32	633.747	-9999	-9999
2003	329	54000	54600	54300	15.5714	4.75714	-37.5571	-9999	-37.7571	-0.2	622.34	-9999	-9999
2003	329	54600	55200	54900	14.5	4.78	-37.72	-9999	-37.91	-0.19	613.813	-9999	-9999
2003	329	55200	55800	55500	13.9	4.99	-37.72	-9999	-37.96	-0.24	620.32	-9999	-9999
2003	329	55800	56400	56100	13.8	4.62	-37.72	-9999	-37.91	-0.19	607.249	-9999	-9999
2003	329	56400	57000	56700	14.6	4.73	-37.98	-9999	-38	-0.02	606.893	-9999	-9999
2003	329	57000	57600	57300	17.5	4.57	-37.99	-9999	-38	-0.01	626.169	-9999	-9999
2003	329	57600	58200	57900	18	4.46	-37.93	-9999	-37.96	-0.03	635.378	-9999	-9999
2003	329	58200	58800	58500	19.4	4.2	-37.9	-9999	-37.91	-0.01	625.891	-9999	-9999
2003	329	58800	59400	59100	20.3	4.3	-37.93	-9999	-37.84	0.09	609.229	-9999	-9999
2003	329	59400	60000	59700	21.1	4.27	-38	-9999	-37.88	0.12	605.556	-9999	-9999
2003	329	60000	60600	60300	21.9	4.25	-38.04	-9999	-37.92	0.12	605.819	-9999	-9999
2003	329	60600	61200	60900	19.2999	4.61	-37.94	-9999	-37.91	0.03	611.16	-9999	-9999
2003	329	61200	61800	61500	17	4.87	-37.8	-9999	-37.78	0.02	-9999	-9999	-9999
2003	329	61800	62400	62100	18.7	4.88	-37.7	-9999	-37.7	0	656.326	-9999	-9999
2003	329	62400	63000	62700	16.8	4.86	-37.7	-9999	-37.9	-0.2	649.029	-9999	-9999
2003	329	63000	63600	63300	17.2	4.62	-37.74	-9999	-37.94	-0.2	637.813	-9999	-9999
2003	329	63600	64200	63900	17.8	4.61	-37.7	-9999	-37.93	-0.23	635.407	-9999	-9999
2003	329	64200	64800	64500	16.3	4.78	-37.8	-9999	-37.98	-0.18	635.39	-9999	-9999
2003	329	64800	65400	65100	15.8	5.05	-37.7	-9999	-37.95	-0.25	632.528	-9999	-9999
2003	329	65400	66000	65700	16.7	5.06	-37.7	-9999	-38	-0.3	647.536	-9999	-9999
2003	329	66000	66600	66300	18.8	4.73	-37.76	-9999	-38	-0.24	650.278	-9999	-9999
2003	329	66600	67200	66900	18.5	4.74	-37.76	-9999	-37.91	-0.15	644.353	-9999	-9999
2003	329	67200	67800	67500	18.6	4.76	-37.78	-9999	-37.9	-0.12	636.284	-9999	-9999
2003	329	67800	68400	68100	20.6	4.55	-37.82	-9999	-37.9	-0.08	626.107	-9999	-9999
2003	329	68400	69000	68700	20.9	4.51	-37.9	-9999	-37.86	0.04	622.729	-9999	-9999
2003	329	69000	69600	69300	21	4.41	-37.9	-9999	-37.9	0	-9999	-9999	-9999
2003	329	69600	70200	69900	22.4001	4.26	-37.92	-9999	-37.9	0.02	-9999	-9999	-9999
2003	329	70200	70800	70500	23	4.59	-37.88	-9999	-37.7	0.18	-9999	-9999	-9999
2003	329	70800	71400	71100	23.5	4.53	-37.76	-9999	-37.7	0.06	-9999	-9999	-9999
2003	329	71400	72000	71700	24.75	4.5	-37.85	-9999	-37.9	-0.05	-9999	-9999	-9999
2003	329	72000	72600	72300	-9999	-9999	-9999	-9999	-9999	-9999	-9999	-9999	-9999
2003	329	72600	73200	72900	-9999	-9999	-9999	-9999	-9999	-9999	-9999	-9999	-9999
2003	329	73200	73800	73500	-9999	-9999	-9999	-9999	-9999	-9999	-9999	-9999	-9999
2003	329	73800	74400	74100	-9999	-9999	-9999	-9999	-9999	-9999	-9999	-9999	-9999
2003	329	74400	75000	74700	-9999	-9999	-9999	-9999	-9999	-9999	-9999	-9999	-9999
2003	329	75000	75600	75300	-9999	-9999	-9999	-9999	-9999	-9999	-9999	-9999	-9999
2003	329	75600	76200	75900	-9999	-9999	-9999	-9999	-9999	-9999	-9999	-9999	-9999
2003	329	76200	76800	76500	36.5714	3.8	-37.9	-9999	-9999	-9999	-9999	-9999	-9999
2003	329	76800	77400	77100	34.5	4.25	-37.9	-9999	-37.9625	-0.0625	-9999	-9999	-9999
2003	329	77400	78000	77700	30.3	4.51	-38	-9999	-38	0	-9999	-9999	-9999
2003	329	78000	78600	78300	26.7	4.92	-37.95	-9999	-37.87	0.08	-9999	-9999	-9999
2003	329	78600	79200	78900	25.4	5.28	-37.7	-9999	-37.7	0	-9999	-9999	-9999
2003	329	79200	79800	79500	26.4	4.95	-37.78	-9999	-37.76	0.02	-9999	-9999	-9999
2003	329	79800	80400	80100	28.1	4.88	-37.94	-9999	-37.84	0.1	-9999	-9999	-9999
2003	329	80400	81000	80700	29.7	4.87	-37.96	-9999	-37.7	0.26	-9999	-9999	-9999
2003	329	81000	81600	81300	30.7	4.7	-37.87	-9999	-37.68	0.19	-9999	-9999	-9999
2003	329	81600	82200	81900	34.2	4.62	-37.86	-9999	-37.7	0.16	409.822	-9999	-9999
2003	329	82200	82800	82500	41.8005	4.64	-37.94	-9999	-37.8	0.14	-9999	-9999	-9999
2003	329	82800	83400	83100	41.8	4.7	-38.17	-9999	-37.92	0.25	547.864	-9999	-9999
2003	329	83400	84000	83700	41.6002	4.35	-38.2	-9999	-37.97	0.23	546.004	-9999	-9999
2003	329	84000	84600	84300	42.8995	4.03	-38.32	-9999	-38.06	0.26	532.398	-9999	-9999
2003	329	84600	85200	84900	49.4998	3.8	-38.46	-9999	-38.1	0.36	523.958	-9999	-9999
2003	329	85200	85800	85500	52.5999	3.7	-38.5	-9999	-38.2	0.3	527.729	-9999	-9999
2003	329	85800	86400	86100	53.0999	3.77	-38.5	-9999	-38.2	0.3	523.58	-9999	-9999
2003	330	0	600	300	55.2	3.74	-38.6	-9999	-38.28	0.32	536.484	-9999	-9999
2003	330	600	1200	900	51.5	3.94	-38.6	-9999	-38.22	0.38	520.554	-9999	-9999
2003	330	1200	1800	1500	52.7999	3.87	-38.59	-9999	-38.14	0.45	502.282	-9999	-9999
2003	330	1800	2400	2100	56.7	3.66	-38.6	-9999	-38.2	0.4	504.453	-9999	-9999
2003	330	2400	3000	2700	54.2	3.85	-38.54	-9999	-38.2	0.34	484.456	-9999	-9999
2003	330	3000	3600	3300	53.4	4.06	-38.53	-9999	-38.2	0.33	463.504	-9999	-9999
2003	330	3600	4200	3900	51	3.96	-38.43	-9999	-38.2	0.23	451.92	-9999	-9999
2003	330	4200	4800	4500	54.4001	3.68	-38.4	-9999	-38.06	0.34	441.027	-9999	-9999
2003	330	4800	5400	5100	53.6013	3.65	-38.27	-9999	-37.74	0.53	384.315	-9999	-9999
2003	330	5400	6000	5700	51.7001	3.93	-38.19	-9999	-37.68	0.51	370.949	-9999	-9999
2003	330	6000	6600	6300	51.9	3.86	-38.09	-9999	-37.74	0.35	369.469	-9999	-9999
2003	330	6600	7200	6900	55.2	3.86	-38.13	-9999	-37.84	0.29	373.727	-9999	-9999
2003	330	7200	7800	7500	55.7	3.98	-38.21	-9999	-37.97	0.24	375.247	-9999	-9999
2003	330	7800	8400	8100	55.6	4.1	-38.28	-9999	-38	0.28	384.607	-9999	-9999
2003	330	8400	9000	8700	55.7998	4.05	-38.24	-9999	-37.93	0.31	387.691	-9999	-9999
2003	330	9000	9600	9300	60.2	4.03	-38.24	-9999	-37.93	0.31	371.58	-9999	-9999
2003	330	9600	10200	9900	58.8999	4.33	-38.2	-9999	-37.74	0.46	353.64	-9999	-9999
2003	330	10200	10800	10500	55.4	4.64	-38.12	-9999	-37.58	0.54	351.68	-9999	-9999
2003	330	10800	11400	11100	57.8	4.59	-38.22	-9999	-37.56	0.66	377.507	-9999	-9999
2003	330	11400	12000	11700	60.1001	4.6	-38.2	-9999	-37.6	0.6	370.564	-9999	-9999
2003	330	12000	12600	12300	62.3998	4.16	-38.21	-9999	-37.78	0.43	372.876	-9999	-9999
2003	330	12600	13200	12900	64.4	4.14	-38.19	-9999	-37.7	0.49	371.709	-9999	-9999
2003	330	13200	13800	13500	61.2999	4.15	-38.18	-9999	-37.62	0.56	385.859	-9999	-9999
2003	330	13800	14400	14100	54.1998	4.25	-37.94	-9999	-37.45	0.49	-9999	-9999	-9999
2003	330	14400	15000	14700	56.2	4.19	-37.74	-9999	-37.34	0.4	323.648	-9999	-9999
2003	330	15000	15600	15300	56.4	4.1	-37.71	-9999	-37.29	0.42	349.241	-9999	-9999
2003	330	15600	16200	15900	60.3999	4.13	-37.85	-9999	-37.45	0.4	-9999	-9999	-9999
2003	330	16200	16800	16500	65.5	3.78333	-38.0833	-9999	-37.6667	0.416667	446.989	-9999	-9999
2003	330	16800	17400	17100	68.0003	3.53	-38.05	-9999	-37.64	0.41	434.022	-9999	-9999
2003	330	17400	18000	17700	69.3978	3.12	-38.27	-9999	-37.94	0.33	450.238	-9999	-9999
2003	330	18000	18600	18300	67	3.9	-38.2	-9999	-37.63	0.57	432.969	-9999	-9999
2003	330	18600	19200	18900	69.5	3.78	-38.19	-9999	-37.73	0.46	425.696	-9999	-9999
2003	330	19200	19800	19500	71.5	3.84	-38.13	-9999	-37.67	0.46	421.338	-9999	-9999
2003	330	19800	20400	20100	72.9001	3.72	-38.1	-9999	-37.84	0.26	429.027	-9999	-9999
2003	330	20400	21000	20700	70.1	3.9	-38.1	-9999	-37.85	0.25	431.133	-9999	-9999
2003	330	21000	21600	21300	64.3332	3.98889	-38.08	-9999	-37.68	0.4	430.136	-9999	-9999
2003	330	21600	22200	21900	29	3.8	-37.98	-9999	-37.5	0.48	411.204	-9999	-9999
2003	330	22200	22800	22500	-9999	-9999	-38	-9999	-37.5	0.5	413.478	-9999	-9999
2003	330	22800	23400	23100	-9999	-9999	-9999	-9999	-9999	-9999	416.299	-9999	-9999
2003	330	23400	24000	23700	-9999	-9999	-9999	-9999	-9999	-9999	434.573	-9999	-9999
2003	330	24000	24600	24300	-9999	-9999	-9999	-9999	-9999	-9999	437.096	-9999	-9999
2003	330	24600	25200	24900	-9999	-9999	-9999	-9999	-9999	-9999	432.551	-9999	-9999
2003	330	25200	25800	25500	-9999	-9999	-9999	-9999	-9999	-9999	432.076	-9999	-9999
2003	330	25800	26400	26100	-9999	-9999	-9999	-9999	-9999	-9999	410.222	-9999	-9999
2003	330	26400	27000	26700	-9999	-9999	-9999	-9999	-9999	-9999	415.373	-9999	-9999
2003	330	27000	27600	27300	-9999	-9999	-9999	-9999	-9999	-9999	409.142	-9999	-9999
2003	330	27600	28200	27900	-9999	-9999	-9999	-9999	-9999	-9999	408.611	-9999	-9999
2003	330	28200	28800	28500	-9999	-9999	-9999	-9999	-9999	-9999	418.607	-9999	-9999
2003	330	28800	29400	29100	-9999	-9999	-9999	-9999	-9999	-9999	436.464	-9999	-9999
2003	330	29400	30000	29700	-9999	-9999	-9999	-9999	-9999	-9999	439.742	-9999	-9999
2003	330	30000	30600	30300	65.0001	3.8	-37.6571	-9999	-37.1429	0.514286	440.142	-9999	-9999
2003	330	30600	31200	30900	63.6001	3.66	-37.73	-9999	-37.28	0.45	457.302	-9999	-9999
2003	330	31200	31800	31500	65.1998	4.04	-37.77	-9999	-37.19	0.58	456.464	-9999	-9999
2003	330	31800	32400	32100	60.1001	4.39	-37.72	-9999	-37.1	0.62	-9999	-9999	-9999
2003	330	32400	33000	32700	57.6	4.34	-37.68	-9999	-37.2	0.48	517.5	-9999	-9999
2003	330	33000	33600	33300	60.6	4.04	-37.7	-9999	-37.4	0.3	497.002	-9999	-9999
2003	330	33600	34200	33900	63.1	3.95	-37.71	-9999	-37.46	0.25	496.729	-9999	-9999
2003	330	34200	34800	34500	59.9999	4.14	-37.82	-9999	-37.45	0.37	513.94	-9999	-9999
2003	330	34800	35400	35100	58.8	4.3	-37.87	-9999	-37.4	0.47	529.138	-9999	-9999
2003	330	35400	36000	35700	60.1	3.82	-37.82	-9999	-37.48	0.34	528.719	-9999	-9999
2003	330	36000	36600	36300	60.7	3.8	-37.79	-9999	-37.44	0.35	532.438	-9999	-9999
2003	330	36600	37200	36900	60.5	3.8	-37.82	-9999	-37.45	0.37	540.66	-9999	-9999
2003	330	37200	37800	37500	56.9	4.16	-37.87	-9999	-37.45	0.42	547.009	-9999	-9999
2003	330	37800	38400	38100	55.2857	4.4	-37.8	-9999	-37.3429	0.457143	544.358	-9999	-9999
2003	330	38400	39000	38700	54.8333	4.4	-37.8167	-9999	-37.3833	0.433333	544.313	-9999	-9999
2003	330	39000	39600	39300	52.7	4.03	-37.81	-9999	-37.49	0.32	543.58	-9999	-9999
2003	330	39600	40200	39900	50.5001	4.02	-37.71	-9999	-37.4	0.31	538.509	-9999	-9999
2003	330	40200	40800	40500	46.4998	4.22	-37.69	-9999	-37.38	0.31	524.676	-9999	-9999
2003	330	40800	41400	41100	43.8999	4.67	-37.63	-9999	-37.38	0.25	509.556	-9999	-9999
2003	330	41400	42000	41700	43.8999	4.82	-37.53	-9999	-37.3	0.23	503.422	-9999	-9999
2003	330	42000	42600	42300	42.2	4.77	-37.44	-9999	-37.22	0.22	482.936	-9999	-9999
2003	330	42600	43200	42900	39.7	4.69	-37.43	-9999	-37.24	0.19	467.451	-9999	-9999
2003	330	43200	43800	43500	39.3	4.68	-37.52	-9999	-37.26	0.26	459.982	-9999	-9999
2003	330	43800	44400	44100	38.6	4.88	-37.33	-9999	-37.2	0.13	449.411	-9999	-9999
2003	330	44400	45000	44700	36.9	4.9	-37.31	-9999	-37.2	0.11	435.278	-9999	-9999
2003	330	45000	45600	45300	38.0994	4.74	-37.32	-9999	-37.18	0.14	417.471	-9999	-9999
2003	330	45600	46200	45900	42.9	4.52	-37.32	-9999	-37.2	0.12	405.362	-9999	-9999
2003	330	46200	46800	46500	45.1	4.24	-37.37	-9999	-37.2	0.17	403.207	-9999	-9999
2003	330	46800	47400	47100	43.9001	4.23	-37.31	-9999	-37.2	0.11	401.033	-9999	-9999
2003	330	47400	48000	47700	36.6999	4.44	-37.2	-9999	-37.06	0.14	386.113	-9999	-9999
2003	330	48000	48600	48300	38.2	4.65	-37.16	-9999	-37.04	0.12	387.002	-9999	-9999
2003	330	48600	49200	48900	36.1999	4.44	-37.2	-9999	-37.2	0	397.524	-9999	-9999
2003	330	49200	49800	49500	33.4001	4.83	-37.18	-9999	-37.16	0.02	399.881	-9999	-9999
2003	330	49800	50400	50100	33.1	5.26	-37.05	-9999	-37.02	0.03	-9999	-9999	-9999
2003	330	50400	51000	50700	32.1	5.14	-36.99	-9999	-37.06	-0.07	445.841	-9999	-9999
2003	330	51000	51600	51300	26.0995	5.16	-37	-9999	-37.2	-0.2	424.656	-9999	-9999
2003	330	51600	52200	51900	22.2	5.59	-37.06	-9999	-37.2	-0.14	411.229	-9999	-9999
2003	330	52200	52800	52500	21.9	5.78	-37.12	-9999	-37.2	-0.08	405.382	-9999	-9999
2003	330	52800	53400	53100	21.5	5.67	-37.1	-9999	-37.2	-0.1	399.831	-9999	-9999
2003	330	53400	54000	53700	20.5	5.38	-37.12	-9999	-37.2	-0.08	415	-9999	-9999
2003	330	54000	54600	54300	24.8	5.09	-37.15	-9999	-37.2	-0.05	424.9	-9999	-9999
2003	330	54600	55200	54900	27	5.45	-37.03	-9999	-37.2	-0.17	417.709	-9999	-9999
2003	330	55200	55800	55500	25.2	5.59	-37.08	-9999	-37.2	-0.12	405.713	-9999	-9999
2003	330	55800	56400	56100	27.4	5.55	-37.01	-9999	-37.2	-0.19	393.738	-9999	-9999
2003	330	56400	57000	56700	30	5.63	-36.98	-9999	-37.2	-0.22	382.098	-9999	-9999
2003	330	57000	57600	57300	28.8	5.42	-37.08	-9999	-37.2	-0.12	362.771	-9999	-9999
2003	330	57600	58200	57900	27.7	5.21	-37.33	-9999	-37.26	0.07	353.402	-9999	-9999
2003	330	58200	58800	58500	27	5.21	-37.07	-9999	-37.2	-0.13	349.813	-9999	-9999
2003	330	58800	59400	59100	25.7	5.4	-36.99	-9999	-37.18	-0.19	333.518	-9999	-9999
2003	330	59400	60000	59700	26.2	5.16	-36.83	-9999	-37.1	-0.27	336.544	-9999	-9999
2003	330	60000	60600	60300	25.9	5.25	-36.6	-9999	-36.9	-0.3	330.411	-9999	-9999
2003	330	60600	61200	60900	25.7	5.09	-36.67	-9999	-36.9	-0.23	322.16	-9999	-9999
2003	330	61200	61800	61500	26.3	5.01	-36.62	-9999	-36.84	-0.22	312.927	-9999	-9999
2003	330	61800	62400	62100	27.1	4.94	-36.55	-9999	-36.76	-0.21	307.544	-9999	-9999
2003	330	62400	63000	62700	26.4	4.9	-36.42	-9999	-36.7	-0.28	307.287	-9999	-9999
2003	330	63000	63600	63300	25.9	5.06	-36.42	-9999	-36.68	-0.26	301.669	-9999	-9999
2003	330	63600	64200	63900	25.3	5.23	-36.3	-9999	-36.5	-0.2	298.707	-9999	-9999
2003	330	64200	64800	64500	23.8	5.51	-36.33	-9999	-36.5	-0.17	305.149	-9999	-9999
2003	330	64800	65400	65100	21	5.71	-36.4	-9999	-36.5	-0.1	300.913	-9999	-9999
2003	330	65400	66000	65700	21.3	5.86	-36.46	-9999	-36.5	-0.04	293.744	-9999	-9999
2003	330	66000	66600	66300	23.3	5.96	-36.39	-9999	-36.5	-0.11	294.409	-9999	-9999
2003	330	66600	67200	66900	23.3	5.8	-36.35	-9999	-36.5	-0.15	293.14	-9999	-9999
2003	330	67200	67800	67500	22.6	6.01	-36.36	-9999	-36.41	-0.05	297.458	-9999	-9999
2003	330	67800	68400	68100	23.4	6.07	-36.31	-9999	-36.4	-0.09	-9999	-9999	-9999
2003	330	68400	69000	68700	23.1	6.17	-36.29	-9999	-36.4	-0.11	337.545	-9999	-9999
2003	330	69000	69600	69300	21.5	6.14	-36.34	-9999	-36.36	-0.02	318.678	-9999	-9999
2003	330	69600	70200	69900	21.3	5.91	-36.33	-9999	-36.22	0.11	297.28	-9999	-9999
2003	330	70200	70800	70500	22.2	5.87	-36.3	-9999	-36.22	0.08	291.784	-9999	-9999
2003	330	70800	71400	71100	23.4	6.2	-36.33	-9999	-36.2	0.13	291.184	-9999	-9999
2003	330	71400	72000	71700	23.9	6.45	-36.2	-9999	-36.06	0.14	276.74	-9999	-9999
2003	330	72000	72600	72300	22.7	6.45	-36.14	-9999	-36	0.14	276.169	-9999	-9999
2003	330	72600	73200	72900	21.9	6.42	-36.03	-9999	-36	0.03	285.249	-9999	-9999
2003	330	73200	73800	73500	20.3	6.56	-35.93	-9999	-35.94	-0.01	271.093	-9999	-9999
2003	330	73800	74400	74100	18.9	6.48	-35.89	-9999	-35.96	-0.07	269.049	-9999	-9999
2003	330	74400	75000	74700	18.1	6.42	-35.91	-9999	-35.94	-0.03	270.56	-9999	-9999
2003	330	75000	75600	75300	20.3	6.4	-35.91	-9999	-35.9	0.01	270.276	-9999	-9999
2003	330	75600	76200	75900	21.5	6.37	-35.84	-9999	-35.8	0.04	265.567	-9999	-9999
2003	330	76200	76800	76500	21.6	6.58	-35.79	-9999	-35.8	-0.01	264.911	-9999	-9999
2003	330	76800	77400	77100	23.1	6.35	-35.65	-9999	-35.7	-0.05	257.418	-9999	-9999
2003	330	77400	78000	77700	25.3	5.93	-35.59	-9999	-35.7	-0.11	263.278	-9999	-9999
2003	330	78000	78600	78300	26.4	5.68	-35.56	-9999	-35.7	-0.14	257.922	-9999	-9999
2003	330	78600	79200	78900	25.9	5.95	-35.56	-9999	-35.7	-0.14	251.674	-9999	-9999
2003	330	79200	79800	79500	27.2	5.9	-35.62	-9999	-35.8	-0.18	249.3	-9999	-9999
2003	330	79800	80400	80100	28.4	5.89	-35.81	-9999	-36	-0.19	253.391	-9999	-9999
2003	330	80400	81000	80700	28.6	5.89	-35.94	-9999	-35.97	-0.03	260.233	-9999	-9999
2003	330	81000	81600	81300	28.4001	5.9	-35.71	-9999	-35.88	-0.17	254.029	-9999	-9999
2003	330	81600	82200	81900	24.7	6.24	-35.59	-9999	-35.68	-0.09	252.233	-9999	-9999
2003	330	82200	82800	82500	22.2	6.44	-35.45	-9999	-35.5	-0.05	239.984	-9999	-9999
2003	330	82800	83400	83100	20.9	6.09	-35.36	-9999	-35.48	-0.12	242.767	-9999	-9999
2003	330	83400	84000	83700	22.1	6.05	-35.18	-9999	-35.34	-0.16	237.256	-9999	-9999
2003	330	84000	84600	84300	21.8	6.38	-35.08	-9999	-35.2	-0.12	232.744	-9999	-9999
2003	330	84600	85200	84900	22.7999	6.48	-35.09	-9999	-35.2	-0.11	239.316	-9999	-9999
2003	330	85200	85800	85500	23.7	6.35	-35.14	-9999	-35.2	-0.06	237.37	-9999	-9999
2003	330	85800	86400	86100	22.9024	6.02	-35.14	-9999	-35.2	-0.06	-9999	-9999	-9999
2003	331	0	600	300	13.9714	5.36	-35.16	-9999	-35.19	-0.03	-9999	-9999	-9999
2003	331	600	1200	900	24.5	6.01	-34.97	-9999	-35.05	-0.08	-9999	-9999	-9999
2003	331	1200	1800	1500	24.7	6.17	-34.92	-9999	-34.95	-0.03	-9999	-9999	-9999
2003	331	1800	2400	2100	25.2	5.98	-35.03	-9999	-35.09	-0.06	-9999	-9999	-9999
2003	331	2400	3000	2700	25.8	6.01	-35.21	-9999	-35.18	0.03	-9999	-9999	-9999
2003	331	3000	3600	3300	27.5	5.92	-35.38	-9999	-35.32	0.06	-9999	-9999	-9999
2003	331	3600	4200	3900	28.7	5.91	-35.32	-9999	-35.36	-0.04	-9999	-9999	-9999
2003	331	4200	4800	4500	30	5.5	-35.1	-9999	-35.3	-0.2	-9999	-9999	-9999
2003	331	4800	5400	5100	-9999	-9999	-9999	-9999	-9999	-9999	-9999	-9999	-9999
2003	331	5400	6000	5700	-9999	-9999	-9999	-9999	-9999	-9999	-9999	-9999	-9999
2003	331	6000	6600	6300	-9999	-9999	-9999	-9999	-9999	-9999	-9999	-9999	-9999
2003	331	6600	7200	6900	-9999	-9999	-9999	-9999	-9999	-9999	-9999	-9999	-9999
2003	331	7200	7800	7500	-9999	-9999	-9999	-9999	-9999	-9999	-9999	-9999	-9999
2003	331	7800	8400	8100	-9999	-9999	-9999	-9999	-9999	-9999	-9999	-9999	-9999
2003	331	8400	9000	8700	-9999	-9999	-9999	-9999	-9999	-9999	-9999	-9999	-9999
2003	331	9000	9600	9300	-9999	-9999	-9999	-9999	-9999	-9999	-9999	-9999	-9999
2003	331	9600	10200	9900	-9999	-9999	-9999	-9999	-9999	-9999	-9999	-9999	-9999
2003	331	10200	10800	10500	-9999	-9999	-9999	-9999	-9999	-9999	-9999	-9999	-9999
2003	331	10800	11400	11100	-9999	-9999	-9999	-9999	-9999	-9999	-9999	-9999	-9999
2003	331	11400	12000	11700	-9999	-9999	-9999	-9999	-9999	-9999	-9999	-9999	-9999
2003	331	12000	12600	12300	-9999	-9999	-9999	-9999	-9999	-9999	286.188	-9999	-9999
2003	331	12600	13200	12900	-9999	-9999	-9999	-9999	-9999	-9999	278.809	-9999	-9999
2003	331	13200	13800	13500	-9999	-9999	-9999	-9999	-9999	-9999	272.913	-9999	-9999
2003	331	13800	14400	14100	-9999	-9999	-9999	-9999	-9999	-9999	258.342	-9999	-9999
2003	331	14400	15000	14700	-9999	-9999	-9999	-9999	-9999	-9999	256.096	-9999	-9999
2003	331	15000	15600	15300	-9999	-9999	-9999	-9999	-9999	-9999	273.373	-9999	-9999
2003	331	15600	16200	15900	-9999	-9999	-9999	-9999	-9999	-9999	283.442	-9999	-9999
2003	331	16200	16800	16500	-9999	-9999	-9999	-9999	-9999	-9999	276.082	-9999	-9999
2003	331	16800	17400	17100	-9999	-9999	-9999	-9999	-9999	-9999	255.931	-9999	-9999
2003	331	17400	18000	17700	-9999	-9999	-9999	-9999	-9999	-9999	-9999	-9999	-9999
2003	331	18000	18600	18300	-9999	-9999	-9999	-9999	-9999	-9999	277.795	-9999	-9999
2003	331	18600	19200	18900	-9999	-9999	-9999	-9999	-9999	-9999	257.273	-9999	-9999
2003	331	19200	19800	19500	-9999	-9999	-9999	-9999	-9999	-9999	244.367	-9999	-9999
2003	331	19800	20400	20100	-9999	-9999	-9999	-9999	-9999	-9999	249.08	-9999	-9999
2003	331	20400	21000	20700	-9999	-9999	-9999	-9999	-9999	-9999	263.509	-9999	-9999
2003	331	21000	21600	21300	-9999	-9999	-9999	-9999	-9999	-9999	280.102	-9999	-9999
2003	331	21600	22200	21900	-9999	-9999	-9999	-9999	-9999	-9999	278.933	-9999	-9999
2003	331	22200	22800	22500	-9999	-9999	-9999	-9999	-9999	-9999	276.538	-9999	-9999
2003	331	22800	23400	23100	-9999	-9999	-9999	-9999	-9999	-9999	281.84	-9999	-9999
2003	331	23400	24000	23700	-9999	-9999	-9999	-9999	-9999	-9999	287.616	-9999	-9999
2003	331	24000	24600	24300	-9999	-9999	-9999	-9999	-9999	-9999	268.784	-9999	-9999
2003	331	24600	25200	24900	-9999	-9999	-9999	-9999	-9999	-9999	267.473	-9999	-9999
2003	331	25200	25800	25500	-9999	-9999	-9999	-9999	-9999	-9999	267.649	-9999	-9999
2003	331	25800	26400	26100	-9999	-9999	-9999	-9999	-9999	-9999	260.178	-9999	-9999
2003	331	26400	27000	26700	-9999	-9999	-9999	-9999	-9999	-9999	254.129	-9999	-9999
2003	331	27000	27600	27300	-9999	-9999	-9999	-9999	-9999	-9999	266.467	-9999	-9999
2003	331	27600	28200	27900	-9999	-9999	-9999	-9999	-9999	-9999	263.164	-9999	-9999
2003	331	28200	28800	28500	-9999	-9999	-9999	-9999	-9999	-9999	263.098	-9999	-9999
2003	331	28800	29400	29100	-9999	-9999	-9999	-9999	-9999	-9999	267.351	-9999	-9999
2003	331	29400	30000	29700	-9999	-9999	-9999	-9999	-9999	-9999	271.065	-9999	-9999
2003	331	30000	30600	30300	-9999	-9999	-9999	-9999	-9999	-9999	267.698	-9999	-9999
2003	331	30600	31200	30900	-9999	-9999	-9999	-9999	-9999	-9999	272.08	-9999	-9999
2003	331	31200	31800	31500	-9999	-9999	-9999	-9999	-9999	-9999	268.358	-9999	-9999
2003	331	31800	32400	32100	-9999	-9999	-9999	-9999	-9999	-9999	256.367	-9999	-9999
2003	331	32400	33000	32700	-9999	-9999	-9999	-9999	-9999	-9999	250.976	-9999	-9999
2003	331	33000	33600	33300	-9999	-9999	-9999	-9999	-9999	-9999	247.618	-9999	-9999
2003	331	33600	34200	33900	-9999	-9999	-9999	-9999	-9999	-9999	248.098	-9999	-9999
2003	331	34200	34800	34500	-9999	-9999	-9999	-9999	-9999	-9999	250.991	-9999	-9999
2003	331	34800	35400	35100	-9999	-9999	-9999	-9999	-9999	-9999	253.652	-9999	-9999
2003	331	35400	36000	35700	-9999	-9999	-9999	-9999	-9999	-9999	-9999	-9999	-9999
2003	331	36000	36600	36300	-9999	-9999	-9999	-9999	-9999	-9999	-9999	-9999	-9999
2003	331	36600	37200	36900	-9999	-9999	-9999	-9999	-9999	-9999	258.424	-9999	-9999
2003	331	37200	37800	37500	-9999	-9999	-9999	-9999	-9999	-9999	261.617	-9999	-9999
2003	331	37800	38400	38100	-9999	-9999	-9999	-9999	-9999	-9999	246.584	-9999	-9999
2003	331	38400	39000	38700	-9999	-9999	-9999	-9999	-9999	-9999	241.531	-9999	-9999
2003	331	39000	39600	39300	-9999	-9999	-9999	-9999	-9999	-9999	242.944	-9999	-9999
2003	331	39600	40200	39900	-9999	-9999	-9999	-9999	-9999	-9999	238.133	-9999	-9999
2003	331	40200	40800	40500	-9999	-9999	-9999	-9999	-9999	-9999	240.333	-9999	-9999
2003	331	40800	41400	41100	-9999	-9999	-9999	-9999	-9999	-9999	244.391	-9999	-9999
2003	331	41400	42000	41700	-9999	-9999	-9999	-9999	-9999	-9999	245.831	-9999	-9999
2003	331	42000	42600	42300	-9999	-9999	-9999	-9999	-9999	-9999	241.6	-9999	-9999
2003	331	42600	43200	42900	-9999	-9999	-9999	-9999	-9999	-9999	234.786	-9999	-9999
2003	331	43200	43800	43500	-9999	-9999	-9999	-9999	-9999	-9999	228.111	-9999	-9999
2003	331	43800	44400	44100	-9999	-9999	-9999	-9999	-9999	-9999	225.993	-9999	-9999
2003	331	44400	45000	44700	-9999	-9999	-9999	-9999	-9999	-9999	224.013	-9999	-9999
2003	331	45000	45600	45300	-9999	-9999	-9999	-9999	-9999	-9999	216.72	-9999	-9999
2003	331	45600	46200	45900	-9999	-9999	-9999	-9999	-9999	-9999	213.993	-9999	-9999
2003	331	46200	46800	46500	-9999	-9999	-9999	-9999	-9999	-9999	203.542	-9999	-9999
2003	331	46800	47400	47100	-9999	-9999	-9999	-9999	-9999	-9999	207.804	-9999	-9999
2003	331	47400	48000	47700	-9999	-9999	-9999	-9999	-9999	-9999	207.36	-9999	-9999
2003	331	48000	48600	48300	-9999	-9999	-9999	-9999	-9999	-9999	208.882	-9999	-9999
2003	331	48600	49200	48900	-9999	-9999	-9999	-9999	-9999	-9999	214.278	-9999	-9999
2003	331	49200	49800	49500	-9999	-9999	-9999	-9999	-9999	-9999	218.38	-9999	-9999
2003	331	49800	50400	50100	-9999	-9999	-9999	-9999	-9999	-9999	220.629	-9999	-9999
2003	331	50400	51000	50700	-9999	-9999	-9999	-9999	-9999	-9999	221.896	-9999	-9999
2003	331	51000	51600	51300	-9999	-9999	-9999	-9999	-9999	-9999	221.24	-9999	-9999
2003	331	51600	52200	51900	-9999	-9999	-9999	-9999	-9999	-9999	222.609	-9999	-9999
2003	331	52200	52800	52500	-9999	-9999	-9999	-9999	-9999	-9999	220.113	-9999	-9999
2003	331	52800	53400	53100	-9999	-9999	-9999	-9999	-9999	-9999	220.294	-9999	-9999
2003	331	53400	54000	53700	-9999	-9999	-9999	-9999	-9999	-9999	-9999	-9999	-9999
2003	331	54000	54600	54300	-9999	-9999	-9999	-9999	-9999	-9999	-9999	-9999	-9999
2003	331	54600	55200	54900	-9999	-9999	-9999	-9999	-9999	-9999	242.059	-9999	-9999
2003	331	55200	55800	55500	-9999	-9999	-9999	-9999	-9999	-9999	236.427	-9999	-9999
2003	331	55800	56400	56100	-9999	-9999	-9999	-9999	-9999	-9999	231.367	-9999	-9999
2003	331	56400	57000	56700	-9999	-9999	-9999	-9999	-9999	-9999	232.022	-9999	-9999
2003	331	57000	57600	57300	-9999	-9999	-9999	-9999	-9999	-9999	230.807	-9999	-9999
2003	331	57600	58200	57900	-9999	-9999	-9999	-9999	-9999	-9999	228.511	-9999	-9999
2003	331	58200	58800	58500	-9999	-9999	-9999	-9999	-9999	-9999	228.604	-9999	-9999
2003	331	58800	59400	59100	-9999	-9999	-9999	-9999	-9999	-9999	232.201	-9999	-9999
2003	331	59400	60000	59700	-9999	-9999	-9999	-9999	-9999	-9999	231.367	-9999	-9999
2003	331	60000	60600	60300	-9999	-9999	-9999	-9999	-9999	-9999	235.033	-9999	-9999
2003	331	60600	61200	60900	-9999	-9999	-9999	-9999	-9999	-9999	237.907	-9999	-9999
2003	331	61200	61800	61500	-9999	-9999	-9999	-9999	-9999	-9999	240.46	-9999	-9999
2003	331	61800	62400	62100	-9999	-9999	-9999	-9999	-9999	-9999	240.72	-9999	-9999
2003	331	62400	63000	62700	-9999	-9999	-9999	-9999	-9999	-9999	241.851	-9999	-9999
2003	331	63000	63600	63300	-9999	-9999	-9999	-9999	-9999	-9999	239.32	-9999	-9999
2003	331	63600	64200	63900	-9999	-9999	-9999	-9999	-9999	-9999	239.233	-9999	-9999
2003	331	64200	64800	64500	-9999	-9999	-9999	-9999	-9999	-9999	239.816	-9999	-9999
2003	331	64800	65400	65100	-9999	-9999	-9999	-9999	-9999	-9999	242.2	-9999	-9999
2003	331	65400	66000	65700	-9999	-9999	-9999	-9999	-9999	-9999	245.002	-9999	-9999
2003	331	66000	66600	66300	-9999	-9999	-9999	-9999	-9999	-9999	245.651	-9999	-9999
2003	331	66600	67200	66900	-9999	-9999	-9999	-9999	-9999	-9999	244.602	-9999	-9999
2003	331	67200	67800	67500	-9999	-9999	-9999	-9999	-9999	-9999	240.284	-9999	-9999
2003	331	67800	68400	68100	-9999	-9999	-9999	-9999	-9999	-9999	236.733	-9999	-9999
2003	331	68400	69000	68700	-9999	-9999	-9999	-9999	-9999	-9999	235.446	-9999	-9999
2003	331	69000	69600	69300	-9999	-9999	-9999	-9999	-9999	-9999	233.338	-9999	-9999
2003	331	69600	70200	69900	-9999	-9999	-9999	-9999	-9999	-9999	230.553	-9999	-9999
2003	331	70200	70800	70500	-9999	-9999	-9999	-9999	-9999	-9999	237.364	-9999	-9999
2003	331	70800	71400	71100	-9999	-9999	-9999	-9999	-9999	-9999	243.086	-9999	-9999
2003	331	71400	72000	71700	-9999	-9999	-9999	-9999	-9999	-9999	-9999	-9999	-9999
2003	331	72000	72600	72300	-9999	-9999	-9999	-9999	-9999	-9999	-9999	-9999	-9999
2003	331	72600	73200	72900	-9999	-9999	-9999	-9999	-9999	-9999	277.15	-9999	-9999
2003	331	73200	73800	73500	-9999	-9999	-9999	-9999	-9999	-9999	276.644	-9999	-9999
2003	331	73800	74400	74100	-9999	-9999	-9999	-9999	-9999	-9999	266.929	-9999	-9999
2003	331	74400	75000	74700	-9999	-9999	-9999	-9999	-9999	-9999	259.131	-9999	-9999
2003	331	75000	75600	75300	-9999	-9999	-9999	-9999	-9999	-9999	251.304	-9999	-9999
2003	331	75600	76200	75900	-9999	-9999	-9999	-9999	-9999	-9999	251.404	-9999	-9999
2003	331	76200	76800	76500	-9999	-9999	-9999	-9999	-9999	-9999	249.35	-9999	-9999
2003	331	76800	77400	77100	-9999	-9999	-9999	-9999	-9999	-9999	258.991	-9999	-9999
2003	331	77400	78000	77700	-9999	-9999	-9999	-9999	-9999	-9999	282.351	-9999	-9999
2003	331	78000	78600	78300	-9999	-9999	-9999	-9999	-9999	-9999	286.556	-9999	-9999
2003	331	78600	79200	78900	-9999	-9999	-9999	-9999	-9999	-9999	287.264	-9999	-9999
2003	331	79200	79800	79500	-9999	-9999	-9999	-9999	-9999	-9999	289.927	-9999	-9999
2003	331	79800	80400	80100	-9999	-9999	-9999	-9999	-9999	-9999	295.251	-9999	-9999
2003	331	80400	81000	80700	-9999	-9999	-9999	-9999	-9999	-9999	302.778	-9999	-9999
2003	331	81000	81600	81300	-9999	-9999	-9999	-9999	-9999	-9999	292.256	-9999	-9999
2003	331	81600	82200	81900	44.5714	3.8	-34.8889	-9999	-34.8333	0.0555556	287.504	-9999	-9999
2003	331	82200	82800	82500	45.9	4.13	-34.84	-9999	-34.8	0.04	290.738	-9999	-9999
2003	331	82800	83400	83100	37.2994	4.79	-34.79	-9999	-34.73	0.06	283.371	-9999	-9999
2003	331	83400	84000	83700	36.1	4.99	-34.83	-9999	-34.7	0.13	282.896	-9999	-9999
2003	331	84000	84600	84300	39.6998	4.38	-34.97	-9999	-34.81	0.16	291.098	-9999	-9999
2003	331	84600	85200	84900	43.9999	3.72	-35	-9999	-34.83	0.17	295.891	-9999	-9999
2003	331	85200	85800	85500	41.2997	4.03	-35.03	-9999	-34.76	0.27	287.384	-9999	-9999
2003	331	85800	86400	86100	38.4002	4.86	-34.93	-9999	-34.63	0.3	278.667	-9999	-9999
2003	332	0	600	300	35.5	4.65	-9999	-9999	-34.6	-9999	278.893	-9999	-9999
2003	332	600	1200	900	39	4.51	-34.92	-9999	-34.51	0.4	279.966	-9999	-9999
2003	332	1200	1800	1500	40.9	4.31	-34.97	-9999	-34.6	0.37	301.78	-9999	-9999
2003	332	1800	2400	2100	42.8	4.73	-34.96	-9999	-34.64	0.32	315.038	-9999	-9999
2003	332	2400	3000	2700	37.8	5.12	-34.84	-9999	-34.6	0.24	317.55	-9999	-9999
2003	332	3000	3600	3300	32.5999	5.29	-34.9	-9999	-34.61	0.29	-9999	-9999	-9999
2003	332	3600	4200	3900	31	5.23	-34.81	-9999	-34.67	0.14	353.148	-9999	-9999
2003	332	4200	4800	4500	33.8	4.71	-34.83	-9999	-34.62	0.21	339.88	-9999	-9999
2003	332	4800	5400	5100	38.6	4.46	-34.89	-9999	-34.71	0.18	336.184	-9999	-9999
2003	332	5400	6000	5700	46.3	4.1	-34.99	-9999	-34.81	0.18	342.867	-9999	-9999
2003	332	6000	6600	6300	43.4	4.44	-34.95	-9999	-34.84	0.11	342.656	-9999	-9999
2003	332	6600	7200	6900	39.4	4.58	-34.82	-9999	-34.69	0.13	324.442	-9999	-9999
2003	332	7200	7800	7500	39.6	4.55	-34.82	-9999	-34.78	0.04	333.198	-9999	-9999
2003	332	7800	8400	8100	36.6	4.91	-34.85	-9999	-34.78	0.07	337.024	-9999	-9999
2003	332	8400	9000	8700	34.5	4.76	-34.9	-9999	-34.77	0.13	337.876	-9999	-9999
2003	332	9000	9600	9300	33.5001	4.975	-34.88	-9999	-34.72	0.16	335.429	-9999	-9999
2003	332	9600	10200	9900	32.3	5.29	-34.84	-9999	-34.72	0.12	333.747	-9999	-9999
2003	332	10200	10800	10500	34.5996	4.28	-34.9	-9999	-34.77	0.13	334.242	-9999	-9999
2003	332	10800	11400	11100	53.0059	1.67	-34.84	-9999	-34.8	0.04	334.358	-9999	-9999
2003	332	11400	12000	11700	49.2014	1.85	-34.84	-9999	-34.72	0.12	342.149	-9999	-9999
2003	332	12000	12600	12300	37.6999	3.07	-34.9	-9999	-34.67	0.23	340.762	-9999	-9999
2003	332	12600	13200	12900	31.7001	3.94	-34.9	-9999	-34.6	0.3	336.122	-9999	-9999
2003	332	13200	13800	13500	35.9	4.3	-34.91	-9999	-34.65	0.26	346.411	-9999	-9999
2003	332	13800	14400	14100	47.2999	3.3	-34.96	-9999	-34.74	0.22	348.773	-9999	-9999
2003	332	14400	15000	14700	65.6016	2.45	-35	-9999	-34.8	0.2	369.518	-9999	-9999
2003	332	15000	15600	15300	67.9999	2.4	-35.02	-9999	-34.89	0.13	390.544	-9999	-9999
2003	332	15600	16200	15900	75.5839	2.15	-35.23	-9999	-35.01	0.22	460.18	-9999	-9999
2003	332	16200	16800	16500	72.274	2.28571	-35.4571	-9999	-35.0714	0.385714	496.82	-9999	-9999
2003	332	16800	17400	17100	80.7024	2.13	-35.45	-9999	-35.08	0.37	513.282	-9999	-9999
2003	332	17400	18000	17700	84.2988	2.41	-35.54	-9999	-35.25	0.29	538.931	-9999	-9999
2003	332	18000	18600	18300	97.3001	2.13	-35.68	-9999	-35.42	0.26	530.585	-9999	-9999
2003	332	18600	19200	18900	94.4998	2.44	-35.7	-9999	-35.35	0.35	514.013	-9999	-9999
2003	332	19200	19800	19500	83.2976	2.71	-35.7	-9999	-35.32	0.38	513.349	-9999	-9999
2003	332	19800	20400	20100	80.9009	2.9	-35.7	-9999	-35.32	0.38	497.842	-9999	-9999
2003	332	20400	21000	20700	74.9993	3.17	-35.7	-9999	-35.33	0.37	491.992	-9999	-9999
2003	332	21000	21600	21300	74.3002	3.3	-35.7	-9999	-35.35	0.35	-9999	-9999	-9999
2003	332	21600	22200	21900	70.4	3.29	-35.77	-9999	-35.4	0.37	537.591	-9999	-9999
2003	332	22200	22800	22500	67.6007	3.39	-35.7	-9999	-35.37	0.33	508.267	-9999	-9999
2003	332	22800	23400	23100	58.2999	3.96	-35.7	-9999	-35.21	0.49	479.833	-9999	-9999
2003	332	23400	24000	23700	57.5999	3.68	-35.64	-9999	-35.21	0.43	476.616	-9999	-9999
2003	332	24000	24600	24300	62.5	3.54	-35.6	-9999	-35.27	0.33	477.027	-9999	-9999
2003	332	24600	25200	24900	64.1999	3.58	-35.53	-9999	-35.27	0.26	477.563	-9999	-9999
2003	332	25200	25800	25500	69.7997	3.46	-35.5	-9999	-35.27	0.23	470.949	-9999	-9999
2003	332	25800	26400	26100	74.4	3.48	-35.44	-9999	-35.2	0.24	460.062	-9999	-9999
2003	332	26400	27000	26700	67.0993	3.85	-35.49	-9999	-35.17	0.32	453.476	-9999	-9999
2003	332	27000	27600	27300	73.5975	3.42	-35.4	-9999	-35.14	0.26	448.587	-9999	-9999
2003	332	27600	28200	27900	79.4996	3.07	-35.43	-9999	-35.2	0.23	454.982	-9999	-9999
2003	332	28200	28800	28500	72.5998	3.28	-35.54	-9999	-35.21	0.33	463.646	-9999	-9999
2003	332	28800	29400	29100	76.1001	2.98	-35.58	-9999	-35.25	0.33	484.171	-9999	-9999
2003	332	29400	30000	29700	73.7002	3.36	-35.58	-9999	-35.15	0.43	494.753	-9999	-9999
2003	332	30000	30600	30300	66.7	3.6	-35.6	-9999	-35.1	0.5	503.198	-9999	-9999
2003	332	30600	31200	30900	63.5	3.81	-35.57	-9999	-35.09	0.48	497.471	-9999	-9999
2003	332	31200	31800	31500	61.7	3.76	-35.5	-9999	-35.03	0.47	484.42	-9999	-9999
2003	332	31800	32400	32100	65.7999	3.45	-35.46	-9999	-35.1	0.36	481.629	-9999	-9999
2003	332	32400	33000	32700	74.8008	3.2	-35.49	-9999	-35.2	0.29	488.124	-9999	-9999
2003	332	33000	33600	33300	73.7	3.45	-35.55	-9999	-35.29	0.26	497.402	-9999	-9999
2003	332	33600	34200	33900	79.5002	3.23	-35.67	-9999	-35.37	0.3	507.064	-9999	-9999
2003	332	34200	34800	34500	72.2998	3.55	-35.7	-9999	-35.3	0.4	507.576	-9999	-9999
2003	332	34800	35400	35100	71.5999	3.67	-35.7	-9999	-35.29	0.41	501.569	-9999	-9999
2003	332	35400	36000	35700	77.201	3.35	-35.7	-9999	-35.36	0.34	505.254	-9999	-9999
2003	332	36000	36600	36300	80.8	3.21	-35.7	-9999	-35.33	0.37	505.751	-9999	-9999
2003	332	36600	37200	36900	78.1	3.49	-35.75	-9999	-35.18	0.57	509.493	-9999	-9999
2003	332	37200	37800	37500	84.4001	3.43	-35.8	-9999	-35.13	0.67	517.193	-9999	-9999
2003	332	37800	38400	38100	89.9002	3.36	-35.8	-9999	-35.04	0.76	521.738	-9999	-9999
2003	332	38400	39000	38700	88.8999	3.39	-35.84	-9999	-35	0.84	524.814	-9999	-9999
2003	332	39000	39600	39300	82.4996	3.65	-35.9	-9999	-35	0.9	-9999	-9999	-9999
2003	332	39600	40200	39900	80.8992	3.51	-35.81	-9999	-35.01	0.8	613.568	-9999	-9999
2003	332	40200	40800	40500	86	3.25	-35.96	-9999	-35.09	0.87	625.227	-9999	-9999
2003	332	40800	41400	41100	87.3002	3.34	-36.1	-9999	-35.16	0.94	637.14	-9999	-9999
2003	332	41400	42000	41700	93.3002	3.05	-36.1	-9999	-35.11	0.99	631.438	-9999	-9999
2003	332	42000	42600	42300	91.6	3.33	-36.04	-9999	-35.08	0.96	610.087	-9999	-9999
2003	332	42600	43200	42900	90	3.43	-35.94	-9999	-35.1	0.84	595.42	-9999	-9999
2003	332	43200	43800	43500	93.3	3.19	-35.98	-9999	-35.2	0.78	605.28	-9999	-9999
2003	332	43800	44400	44100	94.8002	3.08	-36	-9999	-35.28	0.72	603.1	-9999	-9999
2003	332	44400	45000	44700	87.2002	3.19	-35.91	-9999	-35.19	0.72	589.777	-9999	-9999
2003	332	45000	45600	45300	84.6	3.15	-35.88	-9999	-35.2	0.68	586.549	-9999	-9999
2003	332	45600	46200	45900	80.8	3.47	-35.81	-9999	-35.2	0.61	575.338	-9999	-9999
2003	332	46200	46800	46500	77.4	3.77	-35.8	-9999	-35.29	0.51	574.424	-9999	-9999
2003	332	46800	47400	47100	75.9	3.59	-35.8	-9999	-35.3	0.5	569.478	-9999	-9999
2003	332	47400	48000	47700	81.5002	3.33	-35.71	-9999	-35.3	0.41	563.469	-9999	-9999
2003	332	48000	48600	48300	80.8	3.49	-35.7	-9999	-35.3	0.4	563.362	-9999	-9999
2003	332	48600	49200	48900	79.4	3.65	-35.67	-9999	-35.3	0.37	557.684	-9999	-9999
2003	332	49200	49800	49500	80.1	3.73	-35.6	-9999	-35.28	0.32	546.767	-9999	-9999
2003	332	49800	50400	50100	79.6	3.74	-35.54	-9999	-35.29	0.25	543.42	-9999	-9999
2003	332	50400	51000	50700	81.5	3.57	-35.59	-9999	-35.28	0.31	552.585	-9999	-9999
2003	332	51000	51600	51300	80.6	3.63	-35.6	-9999	-35.23	0.37	565.151	-9999	-9999
2003	332	51600	52200	51900	83.3	3.42	-35.61	-9999	-35.3	0.31	588	-9999	-9999
2003	332	52200	52800	52500	89.5001	3.09	-35.71	-9999	-35.31	0.4	615.127	-9999	-9999
2003	332	52800	53400	53100	94.5981	3.04	-35.77	-9999	-35.27	0.5	625.927	-9999	-9999
2003	332	53400	54000	53700	99.8999	2.92	-35.81	-9999	-35.34	0.47	631.771	-9999	-9999
2003	332	54000	54600	54300	99.1	3.12	-35.73	-9999	-35.12	0.61	619.064	-9999	-9999
2003	332	54600	55200	54900	99.2	3.04	-35.7	-9999	-35.01	0.69	616.596	-9999	-9999
2003	332	55200	55800	55500	103	2.98	-35.71	-9999	-35.02	0.69	622.624	-9999	-9999
2003	332	55800	56400	56100	104.9	2.89	-35.73	-9999	-35.09	0.64	629.104	-9999	-9999
2003	332	56400	57000	56700	104.6	2.95	-35.77	-9999	-35.18	0.59	633.953	-9999	-9999
2003	332	57000	57600	57300	98.8999	3.07	-35.69	-9999	-35.11	0.58	-9999	-9999	-9999
2003	332	57600	58200	57900	89.2992	3.44	-35.57	-9999	-35.04	0.53	652.034	-9999	-9999
2003	332	58200	58800	58500	84.3	3.69	-35.43	-9999	-35.06	0.37	605.864	-9999	-9999
2003	332	58800	59400	59100	91.2005	3.12	-35.39	-9999	-34.96	0.43	571.516	-9999	-9999
2003	332	59400	60000	59700	92.7001	3.11	-35.27	-9999	-34.91	0.36	554.087	-9999	-9999
2003	332	60000	60600	60300	86.5999	3.58	-35.2	-9999	-34.8	0.4	541.473	-9999	-9999
2003	332	60600	61200	60900	87	3.64	-35.14	-9999	-34.79	0.35	537.664	-9999	-9999
2003	332	61200	61800	61500	89.1999	3.81	-35.06	-9999	-34.79	0.27	534.384	-9999	-9999
2003	332	61800	62400	62100	93.4	3.73	-35	-9999	-34.7	0.3	528.031	-9999	-9999
2003	332	62400	63000	62700	90.6999	4.17	-34.93	-9999	-34.75	0.18	522.609	-9999	-9999
2003	332	63000	63600	63300	88.1	4.38	-34.96	-9999	-34.78	0.18	535.298	-9999	-9999
2003	332	63600	64200	63900	85.6001	4.39	-35	-9999	-34.89	0.11	546.724	-9999	-9999
2003	332	64200	64800	64500	88.5999	3.98	-35.01	-9999	-34.89	0.12	556.764	-9999	-9999
2003	332	64800	65400	65100	95.8999	3.61	-35.1	-9999	-34.9	0.2	559.842	-9999	-9999
2003	332	65400	66000	65700	94	3.78	-35.1	-9999	-34.94	0.16	565.542	-9999	-9999
2003	332	66000	66600	66300	91.6	3.83	-35.19	-9999	-35.06	0.13	581.889	-9999	-9999
2003	332	66600	67200	66900	92.6	3.87	-35.29	-9999	-35.12	0.17	599.82	-9999	-9999
2003	332	67200	67800	67500	91.3	3.95	-35.3	-9999	-35.13	0.17	606.167	-9999	-9999
2003	332	67800	68400	68100	90.7	4.03	-35.3	-9999	-35.14	0.16	631.433	-9999	-9999
2003	332	68400	69000	68700	92.6	3.93	-35.3	-9999	-35.08	0.22	646.036	-9999	-9999
2003	332	69000	69600	69300	95.4997	3.85	-35.3	-9999	-35.07	0.23	657.607	-9999	-9999
2003	332	69600	70200	69900	99.1	3.69	-35.3	-9999	-35.04	0.26	674.916	-9999	-9999
2003	332	70200	70800	70500	102.2	3.79	-35.3	-9999	-35.12	0.18	680.056	-9999	-9999
2003	332	70800	71400	71100	102.1	3.72	-35.3	-9999	-35.14	0.16	687	-9999	-9999
2003	332	71400	72000	71700	100.7	3.87	-35.3	-9999	-35.2	0.1	686.484	-9999	-9999
2003	332	72000	72600	72300	101.2	3.89	-35.3	-9999	-35.13	0.17	680.72	-9999	-9999
2003	332	72600	73200	72900	96.8	4.14	-35.24	-9999	-35.11	0.13	662.642	-9999	-9999
2003	332	73200	73800	73500	97	4.18	-35.2	-9999	-35.14	0.06	648.558	-9999	-9999
2003	332	73800	74400	74100	98.1	4.11	-35.2	-9999	-35.2	0	647.689	-9999	-9999
2003	332	74400	75000	74700	95.6	4.4	-35.18	-9999	-35.16	0.02	649.775	-9999	-9999
2003	332	75000	75600	75300	92.1	5.1	-35.1	-9999	-35.04	0.06	-9999	-9999	-9999
2003	332	75600	76200	75900	93.7001	4.71	-35.12	-9999	-35.04	0.08	687.568	-9999	-9999
2003	332	76200	76800	76500	99.5001	4.23	-35.18	-9999	-35.1	0.08	672.409	-9999	-9999
2003	332	76800	77400	77100	102.5	3.91	-35.2	-9999	-35.17	0.03	659.722	-9999	-9999
2003	332	77400	78000	77700	99.5	3.83	-35.2	-9999	-35.11	0.09	646.7	-9999	-9999
2003	332	78000	78600	78300	96.4	4.09	-35.13	-9999	-35	0.13	627.533	-9999	-9999
2003	332	78600	79200	78900	94.5	4.33	-35	-9999	-35.05	-0.05	622.076	-9999	-9999
2003	332	79200	79800	79500	95.6	4.48	-35.06	-9999	-35.1	-0.04	621.99	-9999	-9999
2003	332	79800	80400	80100	97.9	4.32	-35.16	-9999	-35.18	-0.02	-9999	-9999	-9999
2003	332	80400	81000	80700	99.1	4.41	-35.15	-9999	-35.1	0.05	-9999	-9999	-9999
2003	332	81000	81600	81300	100.3	4.59	-35.1	-9999	-35.17	-0.07	-9999	-9999	-9999
2003	332	81600	82200	81900	-9999	-9999	-9999	-9999	-9999	-9999	-9999	-9999	-9999
2003	332	82200	82800	82500	-9999	-9999	-9999	-9999	-9999	-9999	-9999	-9999	-9999
2003	332	82800	83400	83100	-9999	-9999	-9999	-9999	-9999	-9999	-9999	-9999	-9999
2003	332	83400	84000	83700	-9999	-9999	-9999	-9999	-9999	-9999	-9999	-9999	-9999
2003	332	84000	84600	84300	-9999	-9999	-9999	-9999	-9999	-9999	-9999	-9999	-9999
2003	332	84600	85200	84900	-9999	-9999	-9999	-9999	-9999	-9999	-9999	-9999	-9999
2003	332	85200	85800	85500	-9999	-9999	-9999	-9999	-9999	-9999	-9999	-9999	-9999
2003	332	85800	86400	86100	-9999	-9999	-9999	-9999	-9999	-9999	-9999	-9999	-9999
2003	333	0	600	300	-9999	-9999	-9999	-9999	-9999	-9999	-9999	-9999	-9999
2003	333	600	1200	900	-9999	-9999	-9999	-9999	-9999	-9999	-9999	-9999	-9999
2003	333	1200	1800	1500	-9999	-9999	-9999	-9999	-9999	-9999	-9999	-9999	-9999
2003	333	1800	2400	2100	-9999	-9999	-9999	-9999	-9999	-9999	-9999	-9999	-9999
2003	333	2400	3000	2700	-9999	-9999	-9999	-9999	-9999	-9999	-9999	-9999	-9999
2003	333	3000	3600	3300	-9999	-9999	-9999	-9999	-9999	-9999	-9999	-9999	-9999
2003	333	3600	4200	3900	-9999	-9999	-9999	-9999	-9999	-9999	-9999	-9999	-9999
2003	333	4200	4800	4500	-9999	-9999	-9999	-9999	-9999	-9999	-9999	-9999	-9999
2003	333	4800	5400	5100	-9999	-9999	-9999	-9999	-9999	-9999	-9999	-9999	-9999
2003	333	5400	6000	5700	-9999	-9999	-9999	-9999	-9999	-9999	-9999	-9999	-9999
2003	333	6000	6600	6300	-9999	-9999	-9999	-9999	-9999	-9999	-9999	-9999	-9999
2003	333	6600	7200	6900	-9999	-9999	-9999	-9999	-9999	-9999	-9999	-9999	-9999
2003	333	7200	7800	7500	-9999	-9999	-9999	-9999	-9999	-9999	-9999	-9999	-9999
2003	333	7800	8400	8100	-9999	-9999	-9999	-9999	-9999	-9999	-9999	-9999	-9999
2003	333	8400	9000	8700	-9999	-9999	-9999	-9999	-9999	-9999	-9999	-9999	-9999
2003	333	9000	9600	9300	-9999	-9999	-9999	-9999	-9999	-9999	-9999	-9999	-9999
2003	333	9600	10200	9900	-9999	-9999	-9999	-9999	-9999	-9999	-9999	-9999	-9999
2003	333	10200	10800	10500	-9999	-9999	-9999	-9999	-9999	-9999	-9999	-9999	-9999
2003	333	10800	11400	11100	-9999	-9999	-9999	-9999	-9999	-9999	-9999	-9999	-9999
2003	333	11400	12000	11700	-9999	-9999	-9999	-9999	-9999	-9999	-9999	-9999	-9999
2003	333	12000	12600	12300	-9999	-9999	-9999	-9999	-9999	-9999	-9999	-9999	-9999
2003	333	12600	13200	12900	-9999	-9999	-9999	-9999	-9999	-9999	-9999	-9999	-9999
2003	333	13200	13800	13500	-9999	-9999	-9999	-9999	-9999	-9999	-9999	-9999	-9999
2003	333	13800	14400	14100	-9999	-9999	-9999	-9999	-9999	-9999	-9999	-9999	-9999
2003	333	14400	15000	14700	-9999	-9999	-9999	-9999	-9999	-9999	-9999	-9999	-9999
2003	333	15000	15600	15300	-9999	-9999	-9999	-9999	-9999	-9999	-9999	-9999	-9999
2003	333	15600	16200	15900	-9999	-9999	-9999	-9999	-9999	-9999	-9999	-9999	-9999
2003	333	16200	16800	16500	-9999	-9999	-9999	-9999	-9999	-9999	-9999	-9999	-9999
2003	333	16800	17400	17100	-9999	-9999	-9999	-9999	-9999	-9999	-9999	-9999	-9999
2003	333	17400	18000	17700	-9999	-9999	-9999	-9999	-9999	-9999	-9999	-9999	-9999
2003	333	18000	18600	18300	-9999	-9999	-9999	-9999	-9999	-9999	-9999	-9999	-9999
2003	333	18600	19200	18900	-9999	-9999	-9999	-9999	-9999	-9999	-9999	-9999	-9999
2003	333	19200	19800	19500	-9999	-9999	-9999	-9999	-9999	-9999	-9999	-9999	-9999
2003	333	19800	20400	20100	-9999	-9999	-9999	-9999	-9999	-9999	-9999	-9999	-9999
2003	333	20400	21000	20700	-9999	-9999	-9999	-9999	-9999	-9999	-9999	-9999	-9999
2003	333	21000	21600	21300	-9999	-9999	-9999	-9999	-9999	-9999	-9999	-9999	-9999
2003	333	21600	22200	21900	-9999	-9999	-9999	-9999	-9999	-9999	-9999	-9999	-9999
2003	333	22200	22800	22500	-9999	-9999	-9999	-9999	-9999	-9999	-9999	-9999	-9999
2003	333	22800	23400	23100	-9999	-9999	-9999	-9999	-9999	-9999	-9999	-9999	-9999
2003	333	23400	24000	23700	-9999	-9999	-9999	-9999	-9999	-9999	-9999	-9999	-9999
2003	333	24000	24600	24300	-9999	-9999	-9999	-9999	-9999	-9999	429.335	-9999	-9999
2003	333	24600	25200	24900	-9999	-9999	-9999	-9999	-9999	-9999	-9999	-9999	-9999
2003	333	25200	25800	25500	-9999	-9999	-9999	-9999	-9999	-9999	491.736	-9999	-9999
2003	333	25800	26400	26100	-9999	-9999	-9999	-9999	-9999	-9999	470.8	-9999	-9999
2003	333	26400	27000	26700	-9999	-9999	-9999	-9999	-9999	-9999	455.864	-9999	-9999
2003	333	27000	27600	27300	-9999	-9999	-9999	-9999	-9999	-9999	448.671	-9999	-9999
2003	333	27600	28200	27900	-9999	-9999	-9999	-9999	-9999	-9999	448.833	-9999	-9999
2003	333	28200	28800	28500	-9999	-9999	-9999	-9999	-9999	-9999	443.516	-9999	-9999
2003	333	28800	29400	29100	-9999	-9999	-9999	-9999	-9999	-9999	437.584	-9999	-9999
2003	333	29400	30000	29700	-9999	-9999	-9999	-9999	-9999	-9999	440.34	-9999	-9999
2003	333	30000	30600	30300	-9999	-9999	-9999	-9999	-9999	-9999	442.242	-9999	-9999
2003	333	30600	31200	30900	-9999	-9999	-9999	-9999	-9999	-9999	439.762	-9999	-9999
2003	333	31200	31800	31500	-9999	-9999	-9999	-9999	-9999	-9999	436.378	-9999	-9999
2003	333	31800	32400	32100	-9999	-9999	-9999	-9999	-9999	-9999	439.758	-9999	-9999
2003	333	32400	33000	32700	-9999	-9999	-9999	-9999	-9999	-9999	438.013	-9999	-9999
2003	333	33000	33600	33300	-9999	-9999	-9999	-9999	-9999	-9999	428.889	-9999	-9999
2003	333	33600	34200	33900	-9999	-9999	-9999	-9999	-9999	-9999	438.393	-9999	-9999
2003	333	34200	34800	34500	-9999	-9999	-9999	-9999	-9999	-9999	441.856	-9999	-9999
2003	333	34800	35400	35100	-9999	-9999	-9999	-9999	-9999	-9999	438.214	-9999	-9999
2003	333	35400	36000	35700	-9999	-9999	-9999	-9999	-9999	-9999	426.747	-9999	-9999
2003	333	36000	36600	36300	-9999	-9999	-9999	-9999	-9999	-9999	411.78	-9999	-9999
2003	333	36600	37200	36900	-9999	-9999	-9999	-9999	-9999	-9999	407.762	-9999	-9999
2003	333	37200	37800	37500	-9999	-9999	-9999	-9999	-9999	-9999	405.996	-9999	-9999
2003	333	37800	38400	38100	-9999	-9999	-9999	-9999	-9999	-9999	411.449	-9999	-9999
2003	333	38400	39000	38700	-9999	-9999	-9999	-9999	-9999	-9999	413.739	-9999	-9999
2003	333	39000	39600	39300	-9999	-9999	-9999	-9999	-9999	-9999	405.107	-9999	-9999
2003	333	39600	40200	39900	-9999	-9999	-9999	-9999	-9999	-9999	408.349	-9999	-9999
2003	333	40200	40800	40500	-9999	-9999	-9999	-9999	-9999	-9999	401.938	-9999	-9999
2003	333	40800	41400	41100	-9999	-9999	-9999	-9999	-9999	-9999	410.38	-9999	-9999
2003	333	41400	42000	41700	-9999	-9999	-9999	-9999	-9999	-9999	413.313	-9999	-9999
2003	333	42000	42600	42300	-9999	-9999	-9999	-9999	-9999	-9999	417.371	-9999	-9999
2003	333	42600	43200	42900	-9999	-9999	-9999	-9999	-9999	-9999	-9999	-9999	-9999
2003	333	43200	43800	43500	-9999	-9999	-9999	-9999	-9999	-9999	-9999	-9999	-9999
2003	333	43800	44400	44100	-9999	-9999	-9999	-9999	-9999	-9999	-9999	-9999	-9999
2003	333	44400	45000	44700	-9999	-9999	-9999	-9999	-9999	-9999	440.904	-9999	-9999
2003	333	45000	45600	45300	-9999	-9999	-9999	-9999	-9999	-9999	427.869	-9999	-9999
2003	333	45600	46200	45900	-9999	-9999	-9999	-9999	-9999	-9999	422.807	-9999	-9999
2003	333	46200	46800	46500	-9999	-9999	-9999	-9999	-9999	-9999	423.684	-9999	-9999
2003	333	46800	47400	47100	-9999	-9999	-9999	-9999	-9999	-9999	435.58	-9999	-9999
2003	333	47400	48000	47700	-9999	-9999	-9999	-9999	-9999	-9999	452.891	-9999	-9999
2003	333	48000	48600	48300	-9999	-9999	-9999	-9999	-9999	-9999	463.869	-9999	-9999
2003	333	48600	49200	48900	-9999	-9999	-9999	-9999	-9999	-9999	474.761	-9999	-9999
2003	333	49200	49800	49500	-9999	-9999	-9999	-9999	-9999	-9999	483.19	-9999	-9999
2003	333	49800	50400	50100	-9999	-9999	-9999	-9999	-9999	-9999	497.049	-9999	-9999
2003	333	50400	51000	50700	-9999	-9999	-9999	-9999	-9999	-9999	494.113	-9999	-9999
2003	333	51000	51600	51300	-9999	-9999	-9999	-9999	-9999	-9999	482.82	-9999	-9999
2003	333	51600	52200	51900	-9999	-9999	-9999	-9999	-9999	-9999	471.415	-9999	-9999
2003	333	52200	52800	52500	-9999	-9999	-9999	-9999	-9999	-9999	463.322	-9999	-9999
2003	333	52800	53400	53100	-9999	-9999	-9999	-9999	-9999	-9999	465.136	-9999	-9999
2003	333	53400	54000	53700	-9999	-9999	-9999	-9999	-9999	-9999	469.124	-9999	-9999
2003	333	54000	54600	54300	-9999	-9999	-9999	-9999	-9999	-9999	492.34	-9999	-9999
2003	333	54600	55200	54900	-9999	-9999	-9999	-9999	-9999	-9999	512.684	-9999	-9999
2003	333	55200	55800	55500	-9999	-9999	-9999	-9999	-9999	-9999	532.264	-9999	-9999
2003	333	55800	56400	56100	-9999	-9999	-9999	-9999	-9999	-9999	545.213	-9999	-9999
2003	333	56400	57000	56700	-9999	-9999	-9999	-9999	-9999	-9999	555.782	-9999	-9999
2003	333	57000	57600	57300	-9999	-9999	-9999	-9999	-9999	-9999	564.304	-9999	-9999
2003	333	57600	58200	57900	-9999	-9999	-9999	-9999	-9999	-9999	569.516	-9999	-9999
2003	333	58200	58800	58500	-9999	-9999	-9999	-9999	-9999	-9999	575.651	-9999	-9999
2003	333	58800	59400	59100	-9999	-9999	-9999	-9999	-9999	-9999	576.931	-9999	-9999
2003	333	59400	60000	59700	-9999	-9999	-9999	-9999	-9999	-9999	573.269	-9999	-9999
2003	333	60000	60600	60300	-9999	-9999	-9999	-9999	-9999	-9999	572.803	-9999	-9999
2003	333	60600	61200	60900	-9999	-9999	-9999	-9999	-9999	-9999	-9999	-9999	-9999
2003	333	61200	61800	61500	-9999	-9999	-9999	-9999	-9999	-9999	629.221	-9999	-9999
2003	333	61800	62400	62100	-9999	-9999	-9999	-9999	-9999	-9999	603.911	-9999	-9999
2003	333	62400	63000	62700	-9999	-9999	-9999	-9999	-9999	-9999	587.219	-9999	-9999
2003	333	63000	63600	63300	-9999	-9999	-9999	-9999	-9999	-9999	587.289	-9999	-9999
2003	333	63600	64200	63900	-9999	-9999	-9999	-9999	-9999	-9999	591.819	-9999	-9999
2003	333	64200	64800	64500	-9999	-9999	-9999	-9999	-9999	-9999	601.178	-9999	-9999
2003	333	64800	65400	65100	-9999	-9999	-9999	-9999	-9999	-9999	612.027	-9999	-9999
2003	333	65400	66000	65700	-9999	-9999	-9999	-9999	-9999	-9999	615.967	-9999	-9999
2003	333	66000	66600	66300	-9999	-9999	-9999	-9999	-9999	-9999	611.862	-9999	-9999
2003	333	66600	67200	66900	-9999	-9999	-9999	-9999	-9999	-9999	614.04	-9999	-9999
2003	333	67200	67800	67500	-9999	-9999	-9999	-9999	-9999	-9999	611.309	-9999	-9999
2003	333	67800	68400	68100	-9999	-9999	-9999	-9999	-9999	-9999	604.356	-9999	-9999
2003	333	68400	69000	68700	-9999	-9999	-9999	-9999	-9999	-9999	605.507	-9999	-9999
2003	333	69000	69600	69300	-9999	-9999	-9999	-9999	-9999	-9999	606.071	-9999	-9999
2003	333	69600	70200	69900	-9999	-9999	-9999	-9999	-9999	-9999	608.682	-9999	-9999
2003	333	70200	70800	70500	-9999	-9999	-9999	-9999	-9999	-9999	612.84	-9999	-9999
2003	333	70800	71400	71100	-9999	-9999	-9999	-9999	-9999	-9999	612.073	-9999	-9999
2003	333	71400	72000	71700	-9999	-9999	-9999	-9999	-9999	-9999	610.347	-9999	-9999
2003	333	72000	72600	72300	-9999	-9999	-9999	-9999	-9999	-9999	612.476	-9999	-9999
2003	333	72600	73200	72900	-9999	-9999	-9999	-9999	-9999	-9999	611.167	-9999	-9999
2003	333	73200	73800	73500	-9999	-9999	-9999	-9999	-9999	-9999	613.14	-9999	-9999
2003	333	73800	74400	74100	-9999	-9999	-9999	-9999	-9999	-9999	617.187	-9999	-9999
2003	333	74400	75000	74700	-9999	-9999	-9999	-9999	-9999	-9999	616.569	-9999	-9999
2003	333	75000	75600	75300	-9999	-9999	-9999	-9999	-9999	-9999	612.219	-9999	-9999
2003	333	75600	76200	75900	-9999	-9999	-9999	-9999	-9999	-9999	610.913	-9999	-9999
2003	333	76200	76800	76500	-9999	-9999	-9999	-9999	-9999	-9999	609.218	-9999	-9999
2003	333	76800	77400	77100	-9999	-9999	-9999	-9999	-9999	-9999	610.382	-9999	-9999
2003	333	77400	78000	77700	-9999	-9999	-9999	-9999	-9999	-9999	606.916	-9999	-9999
2003	333	78000	78600	78300	-9999	-9999	-9999	-9999	-9999	-9999	605.394	-9999	-9999
2003	333	78600	79200	78900	-9999	-9999	-9999	-9999	-9999	-9999	-9999	-9999	-9999
2003	333	79200	79800	79500	-9999	-9999	-9999	-9999	-9999	-9999	661.692	-9999	-9999
2003	333	79800	80400	80100	-9999	-9999	-9999	-9999	-9999	-9999	641.14	-9999	-9999
2003	333	80400	81000	80700	-9999	-9999	-9999	-9999	-9999	-9999	622.016	-9999	-9999
2003	333	81000	81600	81300	-9999	-9999	-9999	-9999	-9999	-9999	619.248	-9999	-9999
2003	333	81600	82200	81900	-9999	-9999	-9999	-9999	-9999	-9999	625.664	-9999	-9999
2003	333	82200	82800	82500	-9999	-9999	-9999	-9999	-9999	-9999	632.876	-9999	-9999
2003	333	82800	83400	83100	-9999	-9999	-9999	-9999	-9999	-9999	638.571	-9999	-9999
2003	333	83400	84000	83700	-9999	-9999	-9999	-9999	-9999	-9999	641.089	-9999	-9999
2003	333	84000	84600	84300	-9999	-9999	-9999	-9999	-9999	-9999	646.396	-9999	-9999
2003	333	84600	85200	84900	-9999	-9999	-9999	-9999	-9999	-9999	641.362	-9999	-9999
2003	333	85200	85800	85500	-9999	-9999	-9999	-9999	-9999	-9999	643.436	-9999	-9999
2003	333	85800	86400	86100	-9999	-9999	-9999	-9999	-9999	-9999	641.982	-9999	-9999
2003	334	0	600	300	-9999	-9999	-9999	-9999	-9999	-9999	638.678	-9999	-9999
2003	334	600	1200	900	-9999	-9999	-9999	-9999	-9999	-9999	636.895	-9999	-9999
2003	334	1200	1800	1500	-9999	-9999	-9999	-9999	-9999	-9999	634.1	-9999	-9999
2003	334	1800	2400	2100	-9999	-9999	-9999	-9999	-9999	-9999	632.308	-9999	-9999
2003	334	2400	3000	2700	-9999	-9999	-9999	-9999	-9999	-9999	633.696	-9999	-9999
2003	334	3000	3600	3300	-9999	-9999	-9999	-9999	-9999	-9999	634.14	-9999	-9999
2003	334	3600	4200	3900	-9999	-9999	-9999	-9999	-9999	-9999	632.211	-9999	-9999
2003	334	4200	4800	4500	-9999	-9999	-9999	-9999	-9999	-9999	631.338	-9999	-9999
2003	334	4800	5400	5100	-9999	-9999	-9999	-9999	-9999	-9999	626.631	-9999	-9999
2003	334	5400	6000	5700	-9999	-9999	-9999	-9999	-9999	-9999	625.142	-9999	-9999
2003	334	6000	6600	6300	-9999	-9999	-9999	-9999	-9999	-9999	621.724	-9999	-9999
2003	334	6600	7200	6900	-9999	-9999	-9999	-9999	-9999	-9999	618.211	-9999	-9999
2003	334	7200	7800	7500	-9999	-9999	-9999	-9999	-9999	-9999	613.164	-9999	-9999
2003	334	7800	8400	8100	-9999	-9999	-9999	-9999	-9999	-9999	615.65	-9999	-9999
2003	334	8400	9000	8700	-9999	-9999	-9999	-9999	-9999	-9999	614.393	-9999	-9999
2003	334	9000	9600	9300	-9999	-9999	-9999	-9999	-9999	-9999	620.071	-9999	-9999
2003	334	9600	10200	9900	-9999	-9999	-9999	-9999	-9999	-9999	620.422	-9999	-9999
2003	334	10200	10800	10500	-9999	-9999	-9999	-9999	-9999	-9999	-9999	-9999	-9999
2003	334	10800	11400	11100	-9999	-9999	-9999	-9999	-9999	-9999	666.071	-9999	-9999
2003	334	11400	12000	11700	-9999	-9999	-9999	-9999	-9999	-9999	649.389	-9999	-9999
2003	334	12000	12600	12300	-9999	-9999	-9999	-9999	-9999	-9999	632.14	-9999	-9999
2003	334	12600	13200	12900	-9999	-9999	-9999	-9999	-9999	-9999	623.313	-9999	-9999
2003	334	13200	13800	13500	-9999	-9999	-9999	-9999	-9999	-9999	625.976	-9999	-9999
2003	334	13800	14400	14100	-9999	-9999	-9999	-9999	-9999	-9999	627.842	-9999	-9999
2003	334	14400	15000	14700	-9999	-9999	-9999	-9999	-9999	-9999	633.989	-9999	-9999
2003	334	15000	15600	15300	-9999	-9999	-9999	-9999	-9999	-9999	630.391	-9999	-9999
2003	334	15600	16200	15900	-9999	-9999	-9999	-9999	-9999	-9999	633.342	-9999	-9999
2003	334	16200	16800	16500	-9999	-9999	-9999	-9999	-9999	-9999	632.604	-9999	-9999
2003	334	16800	17400	17100	-9999	-9999	-9999	-9999	-9999	-9999	645.411	-9999	-9999
2003	334	17400	18000	17700	-9999	-9999	-9999	-9999	-9999	-9999	653.758	-9999	-9999
2003	334	18000	18600	18300	-9999	-9999	-9999	-9999	-9999	-9999	664.249	-9999	-9999
2003	334	18600	19200	18900	-9999	-9999	-9999	-9999	-9999	-9999	669.416	-9999	-9999
2003	334	19200	19800	19500	-9999	-9999	-9999	-9999	-9999	-9999	672.549	-9999	-9999
2003	334	19800	20400	20100	-9999	-9999	-9999	-9999	-9999	-9999	673.1	-9999	-9999
2003	334	20400	21000	20700	-9999	-9999	-9999	-9999	-9999	-9999	677.773	-9999	-9999
2003	334	21000	21600	21300	-9999	-9999	-9999	-9999	-9999	-9999	679.216	-9999	-9999
2003	334	21600	22200	21900	-9999	-9999	-9999	-9999	-9999	-9999	685.367	-9999	-9999
2003	334	22200	22800	22500	-9999	-9999	-9999	-9999	-9999	-9999	684.727	-9999	-9999
2003	334	22800	23400	23100	-9999	-9999	-9999	-9999	-9999	-9999	680.624	-9999	-9999
2003	334	23400	24000	23700	-9999	-9999	-9999	-9999	-9999	-9999	679.109	-9999	-9999
2003	334	24000	24600	24300	-9999	-9999	-9999	-9999	-9999	-9999	674.504	-9999	-9999
2003	334	24600	25200	24900	-9999	-9999	-9999	-9999	-9999	-9999	676.649	-9999	-9999
2003	334	25200	25800	25500	-9999	-9999	-9999	-9999	-9999	-9999	670.018	-9999	-9999
2003	334	25800	26400	26100	-9999	-9999	-9999	-9999	-9999	-9999	669.641	-9999	-9999
2003	334	26400	27000	26700	-9999	-9999	-9999	-9999	-9999	-9999	664.813	-9999	-9999
2003	334	27000	27600	27300	-9999	-9999	-9999	-9999	-9999	-9999	661.231	-9999	-9999
2003	334	27600	28200	27900	-9999	-9999	-9999	-9999	-9999	-9999	666.691	-9999	-9999
2003	334	28200	28800	28500	-9999	-9999	-9999	-9999	-9999	-9999	-9999	-9999	-9999
2003	334	28800	29400	29100	-9999	-9999	-9999	-9999	-9999	-9999	723.407	-9999	-9999
2003	334	29400	30000	29700	-9999	-9999	-9999	-9999	-9999	-9999	695.74	-9999	-9999
2003	334	30000	30600	30300	-9999	-9999	-9999	-9999	-9999	-9999	681.518	-9999	-9999
2003	334	30600	31200	30900	-9999	-9999	-9999	-9999	-9999	-9999	683.24	-9999	-9999
2003	334	31200	31800	31500	-9999	-9999	-9999	-9999	-9999	-9999	681.942	-9999	-9999
2003	334	31800	32400	32100	-9999	-9999	-9999	-9999	-9999	-9999	686.612	-9999	-9999
2003	334	32400	33000	32700	-9999	-9999	-9999	-9999	-9999	-9999	693.536	-9999	-9999
2003	334	33000	33600	33300	-9999	-9999	-9999	-9999	-9999	-9999	698.238	-9999	-9999
2003	334	33600	34200	33900	-9999	-9999	-9999	-9999	-9999	-9999	699.947	-9999	-9999
2003	334	34200	34800	34500	-9999	-9999	-9999	-9999	-9999	-9999	704.358	-9999	-9999
2003	334	34800	35400	35100	-9999	-9999	-9999	-9999	-9999	-9999	704.291	-9999	-9999
2003	334	35400	36000	35700	-9999	-9999	-9999	-9999	-9999	-9999	707.896	-9999	-9999
2003	334	36000	36600	36300	-9999	-9999	-9999	-9999	-9999	-9999	711.593	-9999	-9999
2003	334	36600	37200	36900	-9999	-9999	-9999	-9999	-9999	-9999	720.262	-9999	-9999
2003	334	37200	37800	37500	-9999	-9999	-9999	-9999	-9999	-9999	734.556	-9999	-9999
2003	334	37800	38400	38100	-9999	-9999	-9999	-9999	-9999	-9999	746.684	-9999	-9999
2003	334	38400	39000	38700	-9999	-9999	-9999	-9999	-9999	-9999	757.875	-9999	-9999
2003	334	39000	39600	39300	-9999	-9999	-9999	-9999	-9999	-9999	770.38	-9999	-9999
2003	334	39600	40200	39900	-9999	-9999	-9999	-9999	-9999	-9999	783.269	-9999	-9999
2003	334	40200	40800	40500	-9999	-9999	-9999	-9999	-9999	-9999	795.438	-9999	-9999
2003	334	40800	41400	41100	-9999	-9999	-9999	-9999	-9999	-9999	807.24	-9999	-9999
2003	334	41400	42000	41700	-9999	-9999	-9999	-9999	-9999	-9999	819.789	-9999	-9999
2003	334	42000	42600	42300	-9999	-9999	-9999	-9999	-9999	-9999	830.616	-9999	-9999
2003	334	42600	43200	42900	-9999	-9999	-9999	-9999	-9999	-9999	837.307	-9999	-9999
2003	334	43200	43800	43500	-9999	-9999	-9999	-9999	-9999	-9999	838.449	-9999	-9999
2003	334	43800	44400	44100	-9999	-9999	-9999	-9999	-9999	-9999	846.487	-9999	-9999
2003	334	44400	45000	44700	-9999	-9999	-9999	-9999	-9999	-9999	852.438	-9999	-9999
2003	334	45000	45600	45300	-9999	-9999	-9999	-9999	-9999	-9999	853.614	-9999	-9999
2003	334	45600	46200	45900	-9999	-9999	-9999	-9999	-9999	-9999	857.967	-9999	-9999
2003	334	46200	46800	46500	-9999	-9999	-9999	-9999	-9999	-9999	-9999	-9999	-9999
2003	334	46800	47400	47100	-9999	-9999	-9999	-9999	-9999	-9999	910.045	-9999	-9999
2003	334	47400	48000	47700	-9999	-9999	-9999	-9999	-9999	-9999	887.396	-9999	-9999
2003	334	48000	48600	48300	-9999	-9999	-9999	-9999	-9999	-9999	857.016	-9999	-9999
2003	334	48600	49200	48900	-9999	-9999	-9999	-9999	-9999	-9999	859.278	-9999	-9999
2003	334	49200	49800	49500	-9999	-9999	-9999	-9999	-9999	-9999	841.376	-9999	-9999
2003	334	49800	50400	50100	-9999	-9999	-9999	-9999	-9999	-9999	814.556	-9999	-9999
2003	334	50400	51000	50700	-9999	-9999	-9999	-9999	-9999	-9999	826.478	-9999	-9999
2003	334	51000	51600	51300	-9999	-9999	-9999	-9999	-9999	-9999	838.627	-9999	-9999
2003	334	51600	52200	51900	-9999	-9999	-9999	-9999	-9999	-9999	838.438	-9999	-9999
2003	334	52200	52800	52500	-9999	-9999	-9999	-9999	-9999	-9999	852.527	-9999	-9999
2003	334	52800	53400	53100	-9999	-9999	-9999	-9999	-9999	-9999	858.453	-9999	-9999
2003	334	53400	54000	53700	-9999	-9999	-9999	-9999	-9999	-9999	816.407	-9999	-9999
2003	334	54000	54600	54300	-9999	-9999	-9999	-9999	-9999	-9999	815.511	-9999	-9999
2003	334	54600	55200	54900	-9999	-9999	-9999	-9999	-9999	-9999	823.644	-9999	-9999
2003	334	55200	55800	55500	-9999	-9999	-9999	-9999	-9999	-9999	831.213	-9999	-9999
2003	334	55800	56400	56100	-9999	-9999	-9999	-9999	-9999	-9999	822.329	-9999	-9999
2003	334	56400	57000	56700	-9999	-9999	-9999	-9999	-9999	-9999	809.453	-9999	-9999
2003	334	57000	57600	57300	-9999	-9999	-9999	-9999	-9999	-9999	790.918	-9999	-9999
2003	334	57600	58200	57900	-9999	-9999	-9999	-9999	-9999	-9999	773.208	-9999	-9999
2003	334	58200	58800	58500	-9999	-9999	-9999	-9999	-9999	-9999	793.118	-9999	-9999
2003	334	58800	59400	59100	-9999	-9999	-9999	-9999	-9999	-9999	781.371	-9999	-9999
2003	334	59400	60000	59700	-9999	-9999	-9999	-9999	-9999	-9999	764.293	-9999	-9999
2003	334	60000	60600	60300	-9999	-9999	-9999	-9999	-9999	-9999	774.127	-9999	-9999
2003	334	60600	61200	60900	-9999	-9999	-9999	-9999	-9999	-9999	782.875	-9999	-9999
2003	334	61200	61800	61500	-9999	-9999	-9999	-9999	-9999	-9999	757.522	-9999	-9999
2003	334	61800	62400	62100	-9999	-9999	-9999	-9999	-9999	-9999	737.404	-9999	-9999
2003	334	62400	63000	62700	-9999	-9999	-9999	-9999	-9999	-9999	737.296	-9999	-9999
2003	334	63000	63600	63300	-9999	-9999	-9999	-9999	-9999	-9999	729.163	-9999	-9999
2003	334	63600	64200	63900	-9999	-9999	-9999	-9999	-9999	-9999	738.87	-9999	-9999
2003	334	64200	64800	64500	-9999	-9999	-9999	-9999	-9999	-9999	-9999	-9999	-9999
2003	334	64800	65400	65100	-9999	-9999	-9999	-9999	-9999	-9999	818.636	-9999	-9999
2003	334	65400	66000	65700	-9999	-9999	-9999	-9999	-9999	-9999	788.518	-9999	-9999
2003	334	66000	66600	66300	-9999	-9999	-9999	-9999	-9999	-9999	764.927	-9999	-9999
2003	334	66600	67200	66900	-9999	-9999	-9999	-9999	-9999	-9999	769.384	-9999	-9999
2003	334	67200	67800	67500	-9999	-9999	-9999	-9999	-9999	-9999	773.267	-9999	-9999
2003	334	67800	68400	68100	-9999	-9999	-9999	-9999	-9999	-9999	782.578	-9999	-9999
2003	334	68400	69000	68700	-9999	-9999	-9999	-9999	-9999	-9999	778.407	-9999	-9999
2003	334	69000	69600	69300	-9999	-9999	-9999	-9999	-9999	-9999	770.307	-9999	-9999
2003	334	69600	70200	69900	-9999	-9999	-9999	-9999	-9999	-9999	789.752	-9999	-9999
2003	334	70200	70800	70500	-9999	-9999	-9999	-9999	-9999	-9999	822.036	-9999	-9999
2003	334	70800	71400	71100	-9999	-9999	-9999	-9999	-9999	-9999	827.122	-9999	-9999
2003	334	71400	72000	71700	-9999	-9999	-9999	-9999	-9999	-9999	847.142	-9999	-9999
2003	334	72000	72600	72300	-9999	-9999	-9999	-9999	-9999	-9999	854.278	-9999	-9999
2003	334	72600	73200	72900	-9999	-9999	-9999	-9999	-9999	-9999	841.871	-9999	-9999
2003	334	73200	73800	73500	-9999	-9999	-9999	-9999	-9999	-9999	830.287	-9999	-9999
2003	334	73800	74400	74100	-9999	-9999	-9999	-9999	-9999	-9999	820.947	-9999	-9999
2003	334	74400	75000	74700	-9999	-9999	-9999	-9999	-9999	-9999	812.544	-9999	-9999
2003	334	75000	75600	75300	-9999	-9999	-9999	-9999	-9999	-9999	801.124	-9999	-9999
2003	334	75600	76200	75900	-9999	-9999	-9999	-9999	-9999	-9999	783.307	-9999	-9999
2003	334	76200	76800	76500	-9999	-9999	-9999	-9999	-9999	-9999	754.933	-9999	-9999
2003	334	76800	77400	77100	-9999	-9999	-9999	-9999	-9999	-9999	744.61	-9999	-9999
2003	334	77400	78000	77700	-9999	-9999	-9999	-9999	-9999	-9999	753.202	-9999	-9999
2003	334	78000	78600	78300	-9999	-9999	-9999	-9999	-9999	-9999	762.222	-9999	-9999
2003	334	78600	79200	78900	-9999	-9999	-9999	-9999	-9999	-9999	758.047	-9999	-9999
2003	334	79200	79800	79500	-9999	-9999	-9999	-9999	-9999	-9999	739.647	-9999	-9999
2003	334	79800	80400	80100	-9999	-9999	-9999	-9999	-9999	-9999	721.593	-9999	-9999
2003	334	80400	81000	80700	-9999	-9999	-9999	-9999	-9999	-9999	717.751	-9999	-9999
2003	334	81000	81600	81300	-9999	-9999	-9999	-9999	-9999	-9999	707.184	-9999	-9999
2003	334	81600	82200	81900	-9999	-9999	-9999	-9999	-9999	-9999	698.319	-9999	-9999
2003	334	82200	82800	82500	-9999	-9999	-9999	-9999	-9999	-9999	-9999	-9999	-9999
2003	334	82800	83400	83100	-9999	-9999	-9999	-9999	-9999	-9999	736.58	-9999	-9999
2003	334	83400	84000	83700	-9999	-9999	-9999	-9999	-9999	-9999	716.976	-9999	-9999
2003	334	84000	84600	84300	-9999	-9999	-9999	-9999	-9999	-9999	710.598	-9999	-9999
2003	334	84600	85200	84900	-9999	-9999	-9999	-9999	-9999	-9999	692.056	-9999	-9999
2003	334	85200	85800	85500	-9999	-9999	-9999	-9999	-9999	-9999	710.382	-9999	-9999
2003	334	85800	86400	86100	-9999	-9999	-9999	-9999	-9999	-9999	717.635	-9999	-9999
2003	335	0	600	300	-9999	-9999	-9999	-9999	-9999	-9999	724.518	-9999	-9999
2003	335	600	1200	900	-9999	-9999	-9999	-9999	-9999	-9999	708.419	-9999	-9999
2003	335	1200	1800	1500	-9999	-9999	-9999	-9999	-9999	-9999	689.429	-9999	-9999
2003	335	1800	2400	2100	-9999	-9999	-9999	-9999	-9999	-9999	674.998	-9999	-9999
2003	335	2400	3000	2700	-9999	-9999	-9999	-9999	-9999	-9999	663.313	-9999	-9999
2003	335	3000	3600	3300	-9999	-9999	-9999	-9999	-9999	-9999	648.54	-9999	-9999
2003	335	3600	4200	3900	-9999	-9999	-9999	-9999	-9999	-9999	643.073	-9999	-9999
2003	335	4200	4800	4500	113	-9999	-9999	-9999	-31.8	-9999	652.564	-9999	-9999
2003	335	4800	5400	5100	115.4	4.275	-31.875	-9999	-31.83	0	671.002	-9999	-9999
2003	335	5400	6000	5700	112.2	4.61	-31.93	-9999	-31.85	0.08	754.149	-9999	-9999
2003	335	6000	6600	6300	109.5	4.38	-31.85	-9999	-31.89	-0.04	805.66	-9999	-9999
2003	335	6600	7200	6900	110.5	4.23	-31.81	-9999	-31.83	-0.02	774.698	-9999	-9999
2003	335	7200	7800	7500	106.3	4.23	-31.79	-9999	-31.77	0.02	765.173	-9999	-9999
2003	335	7800	8400	8100	101.3	4.15	-31.7	-9999	-31.61	0.09	747.769	-9999	-9999
2003	335	8400	9000	8700	104.8	4.53	-31.67	-9999	-31.61	0.06	734.264	-9999	-9999
2003	335	9000	9600	9300	111.6	4.23	-31.78	-9999	-31.72	0.06	753.344	-9999	-9999
2003	335	9600	10200	9900	106.8	4.37	-31.76	-9999	-31.58	0.18	729.689	-9999	-9999
2003	335	10200	10800	10500	102.6	4.75	-31.46	-9999	-31.31	0.15	678.67	-9999	-9999
2003	335	10800	11400	11100	103.7	4.74	-31.49	-9999	-31.39	0.1	695.64	-9999	-9999
2003	335	11400	12000	11700	105	4.5	-31.51	-9999	-31.43	0.08	699.689	-9999	-9999
2003	335	12000	12600	12300	103.101	4.2	-31.54	-9999	-31.46	0.08	712.318	-9999	-9999
2003	335	12600	13200	12900	98.5006	4.25	-31.49	-9999	-31.35	0.14	699.418	-9999	-9999
2003	335	13200	13800	13500	89.6003	4.51	-31.4	-9999	-31.19	0.21	666.616	-9999	-9999
2003	335	13800	14400	14100	89.2005	4.81	-31.26	-9999	-31.06	0.2	-9999	-9999	-9999
2003	335	14400	15000	14700	90.9	5.25	-31.19	-9999	-31	0.19	626.784	-9999	-9999
2003	335	15000	15600	15300	88.4	5.17	-31.2	-9999	-31.01	0.19	593.78	-9999	-9999
2003	335	15600	16200	15900	92.6248	4.55	-31.1875	-9999	-31.1	0.0875	577.56	-9999	-9999
2003	335	16200	16800	16500	104.5	4.9	-31.1333	-9999	-31.0667	0.0666667	581.629	-9999	-9999
2003	335	16800	17400	17100	103	5.93333	-31.1	-9999	-30.925	0.175	585.864	-9999	-9999
2003	335	17400	18000	17700	100.2	5.61	-31.04	-9999	-30.9	0.14	592.929	-9999	-9999
2003	335	18000	18600	18300	101.5	4.77	-31.03	-9999	-30.9	0.13	603.251	-9999	-9999
2003	335	18600	19200	18900	107	4.47	-31.01	-9999	-30.93	0.08	616.787	-9999	-9999
2003	335	19200	19800	19500	113.9	3.73	-31.11	-9999	-31	0.11	624.978	-9999	-9999
2003	335	19800	20400	20100	112.4	3.75	-31.13	-9999	-31	0.13	620.469	-9999	-9999
2003	335	20400	21000	20700	112.2	4.31	-31.1	-9999	-30.95	0.15	587.113	-9999	-9999
2003	335	21000	21600	21300	110.2	4.8	-31.02	-9999	-30.84	0.18	539.38	-9999	-9999
2003	335	21600	22200	21900	105	5.24	-30.93	-9999	-30.77	0.16	499.427	-9999	-9999
2003	335	22200	22800	22500	104.1	5.54	-30.9	-9999	-30.69	0.21	474.502	-9999	-9999
2003	335	22800	23400	23100	103.2	5.45	-30.83	-9999	-30.72	0.11	455.147	-9999	-9999
2003	335	23400	24000	23700	99.3003	5.45	-30.89	-9999	-30.76	0.13	448.798	-9999	-9999
2003	335	24000	24600	24300	97.4	5.63	-30.86	-9999	-30.69	0.17	437.891	-9999	-9999
2003	335	24600	25200	24900	96.2999	5.68	-30.82	-9999	-30.7	0.12	435.733	-9999	-9999
2003	335	25200	25800	25500	100.9	5.68	-30.86	-9999	-30.74	0.12	444.718	-9999	-9999
2003	335	25800	26400	26100	100.9	5.96	-30.92	-9999	-30.82	0.1	459.74	-9999	-9999
2003	335	26400	27000	26700	97.2	5.72	-31	-9999	-30.9	0.1	480.931	-9999	-9999
2003	335	27000	27600	27300	96.9	5.71	-31.1	-9999	-30.99	0.11	500.991	-9999	-9999
2003	335	27600	28200	27900	97	5.94	-31.12	-9999	-31.04	0.08	527.064	-9999	-9999
2003	335	28200	28800	28500	97.3	5.62	-31.2	-9999	-31.1	0.1	543.513	-9999	-9999
2003	335	28800	29400	29100	94.5999	5.8	-31.2	-9999	-31.09	0.11	550.327	-9999	-9999
2003	335	29400	30000	29700	91.5	6.05	-31.18	-9999	-31.03	0.15	547.855	-9999	-9999
2003	335	30000	30600	30300	94.3001	6.08	-31.12	-9999	-31	0.12	544.627	-9999	-9999
2003	335	30600	31200	30900	97.6999	5.52	-31.19	-9999	-31.06	0.13	550.976	-9999	-9999
2003	335	31200	31800	31500	98.1004	5.3	-31.2	-9999	-31.1	0.1	545.281	-9999	-9999
2003	335	31800	32400	32100	93.9998	4.99	-31.2	-9999	-31.11	0.09	-9999	-9999	-9999
2003	335	32400	33000	32700	93.1004	5.05	-31.26	-9999	-31.14	0.12	589.818	-9999	-9999
2003	335	33000	33600	33300	97.4001	5.22	-31.2	-9999	-31.11	0.09	559.016	-9999	-9999
2003	335	33600	34200	33900	96.1	5.2	-31.21	-9999	-31.12	0.09	537.709	-9999	-9999
2003	335	34200	34800	34500	95.7	5.7	-31.23	-9999	-31.15	0.08	537.107	-9999	-9999
2003	335	34800	35400	35100	94.7	5.78	-31.28	-9999	-31.18	0.1	540.104	-9999	-9999
2003	335	35400	36000	35700	97.5001	5.75	-31.29	-9999	-31.2	0.09	534.738	-9999	-9999
2003	335	36000	36600	36300	95.3	5.62	-31.23	-9999	-31.11	0.12	531.578	-9999	-9999
2003	335	36600	37200	36900	94.5	5.83	-31.19	-9999	-31.08	0.11	519.822	-9999	-9999
2003	335	37200	37800	37500	93.9998	5.8	-31.19	-9999	-31.09	0.1	523.264	-9999	-9999
2003	335	37800	38400	38100	97.9	6.11	-31.12	-9999	-31.07	0.05	521.653	-9999	-9999
2003	335	38400	39000	38700	95.4	5.82	-31.14	-9999	-31.1	0.04	521.413	-9999	-9999
2003	335	39000	39600	39300	96.6	5.73	-31.18	-9999	-31.11	0.07	511.593	-9999	-9999
2003	335	39600	40200	39900	96.7	5.73	-31.13	-9999	-31	0.13	498.3	-9999	-9999
2003	335	40200	40800	40500	93.8001	5.59	-31.1	-9999	-31	0.1	490.889	-9999	-9999
2003	335	40800	41400	41100	93.1	5.76	-31.04	-9999	-30.88	0.16	469.24	-9999	-9999
2003	335	41400	42000	41700	93.1	5.83	-31	-9999	-30.85	0.15	455.947	-9999	-9999
2003	335	42000	42600	42300	95.0001	5.85	-30.99	-9999	-30.86	0.13	449.87	-9999	-9999
2003	335	42600	43200	42900	92.4001	5.92	-30.9	-9999	-30.8	0.1	435.542	-9999	-9999
2003	335	43200	43800	43500	92.7	6.07	-30.92	-9999	-30.82	0.1	433.569	-9999	-9999
2003	335	43800	44400	44100	90.3995	5.77	-30.97	-9999	-30.87	0.1	432.413	-9999	-9999
2003	335	44400	45000	44700	90.7003	5.79	-31	-9999	-30.91	0.09	434.798	-9999	-9999
2003	335	45000	45600	45300	88.2	5.66	-31.05	-9999	-30.99	0.06	436.213	-9999	-9999
2003	335	45600	46200	45900	89.9001	6.06	-31.01	-9999	-30.96	0.05	426.856	-9999	-9999
2003	335	46200	46800	46500	88.2	6.2	-31.05	-9999	-30.99	0.06	421.944	-9999	-9999
2003	335	46800	47400	47100	85.8	6.27	-31	-9999	-30.99	0.01	417.973	-9999	-9999
2003	335	47400	48000	47700	84.6	6.33	-31.05	-9999	-31	0.05	418.838	-9999	-9999
2003	335	48000	48600	48300	85.3997	6.21	-31.09	-9999	-31.02	0.07	418.002	-9999	-9999
2003	335	48600	49200	48900	88.1	5.77	-31.17	-9999	-31.1	0.07	420.52	-9999	-9999
2003	335	49200	49800	49500	86	5.73	-31.16	-9999	-31.05	0.11	419.699	-9999	-9999
2003	335	49800	50400	50100	85.5	5.62	-31.15	-9999	-31.09	0.06	-9999	-9999	-9999
2003	335	50400	51000	50700	85.7	5.33	-31.2	-9999	-31.1	0.1	-9999	-9999	-9999
2003	335	51000	51600	51300	86.3	5.43	-31.18	-9999	-31.08	0.1	-9999	-9999	-9999
2003	335	51600	52200	51900	83.3	5.62	-31.07	-9999	-30.99	0.08	-9999	-9999	-9999
2003	335	52200	52800	52500	81.4	5.98	-30.97	-9999	-30.89	0.08	390.837	-9999	-9999
2003	335	52800	53400	53100	81.5	6.07	-31	-9999	-30.9	0.1	391.633	-9999	-9999
2003	335	53400	54000	53700	82.2	5.95	-31	-9999	-30.9	0.1	389.089	-9999	-9999
2003	335	54000	54600	54300	83.6999	5.68	-31	-9999	-30.85	0.15	386.551	-9999	-9999
2003	335	54600	55200	54900	88	5.47	-31	-9999	-30.89	0.11	386.982	-9999	-9999
2003	335	55200	55800	55500	87.1	5.46	-30.98	-9999	-30.86	0.12	383.38	-9999	-9999
2003	335	55800	56400	56100	87.7	5.52	-30.92	-9999	-30.82	0.1	383.976	-9999	-9999
2003	335	56400	57000	56700	89.5999	5.33	-30.9	-9999	-30.8	0.1	378.507	-9999	-9999
2003	335	57000	57600	57300	93.8	5.29	-30.9	-9999	-30.82	0.08	385.342	-9999	-9999
2003	335	57600	58200	57900	93	5.23	-30.9	-9999	-30.85	0.05	383.193	-9999	-9999
2003	335	58200	58800	58500	93.9	5.01	-30.9	-9999	-30.82	0.08	383.426	-9999	-9999
2003	335	58800	59400	59100	97.6998	4.98	-30.83	-9999	-30.8	0.03	382.247	-9999	-9999
2003	335	59400	60000	59700	100.7	4.98	-30.9	-9999	-30.86	0.04	388.944	-9999	-9999
2003	335	60000	60600	60300	98.1	5.05	-30.9	-9999	-30.9	0	390.887	-9999	-9999
2003	335	60600	61200	60900	94.8	5.37	-30.9	-9999	-30.84	0.06	389.073	-9999	-9999
2003	335	61200	61800	61500	92	5.03	-30.84	-9999	-30.81	0.03	388.84	-9999	-9999
2003	335	61800	62400	62100	92.1001	4.84	-30.8	-9999	-30.79	0.01	385.96	-9999	-9999
2003	335	62400	63000	62700	93.7	5.2	-30.76	-9999	-30.71	0.05	380.92	-9999	-9999
2003	335	63000	63600	63300	93.3	5.57	-30.71	-9999	-30.7	0.01	383.72	-9999	-9999
2003	335	63600	64200	63900	95.2	5.56	-30.8	-9999	-30.79	0.01	395.324	-9999	-9999
2003	335	64200	64800	64500	95.5	5.78	-30.88	-9999	-30.82	0.06	403.273	-9999	-9999
2003	335	64800	65400	65100	95.6	6.17	-30.89	-9999	-30.8	0.09	406.191	-9999	-9999
2003	335	65400	66000	65700	96.2	6.28	-30.86	-9999	-30.82	0.04	406.391	-9999	-9999
2003	335	66000	66600	66300	93.7	5.81	-30.87	-9999	-30.84	0.03	409.12	-9999	-9999
2003	335	66600	67200	66900	90.6	5.32	-30.9	-9999	-30.93	-0.03	415.302	-9999	-9999
2003	335	67200	67800	67500	86.4	5.3	-30.97	-9999	-31	-0.03	424.208	-9999	-9999
2003	335	67800	68400	68100	86.9	5.44	-31	-9999	-30.96	0.04	-9999	-9999	-9999
2003	335	68400	69000	68700	87.4	5.23	-31	-9999	-31	0	479.625	-9999	-9999
2003	335	69000	69600	69300	90.2	5.04	-31.03	-9999	-31	0.03	453.009	-9999	-9999
2003	335	69600	70200	69900	91.5	4.96	-31.01	-9999	-31	0.01	434.1	-9999	-9999
2003	335	70200	70800	70500	90.1	4.89	-31	-9999	-31	0	418.756	-9999	-9999
2003	335	70800	71400	71100	90.2	4.94	-31	-9999	-31	0	416.996	-9999	-9999
2003	335	71400	72000	71700	89.4	4.61	-30.98	-9999	-30.93	0.05	414.362	-9999	-9999
2003	335	72000	72600	72300	89.5	4.7	-31	-9999	-30.99	0.01	415.633	-9999	-9999
2003	335	72600	73200	72900	91.7	4.73	-31	-9999	-31	0	421.369	-9999	-9999
2003	335	73200	73800	73500	90.8	4.62	-31.06	-9999	-31.01	0.05	424.329	-9999	-9999
2003	335	73800	74400	74100	89.7	4.74	-31.07	-9999	-31.07	0	424.087	-9999	-9999
2003	335	74400	75000	74700	88.7	4.77	-30.97	-9999	-30.95	0.02	414.553	-9999	-9999
2003	335	75000	75600	75300	89.2	4.64	-30.93	-9999	-30.9	0.03	411.667	-9999	-9999
2003	335	75600	76200	75900	93.9	4.58	-31	-9999	-30.98	0.02	416.9	-9999	-9999
2003	335	76200	76800	76500	90.8	4.62	-31.1	-9999	-31.01	0.09	419.831	-9999	-9999
2003	335	76800	77400	77100	88.3001	4.91	-31.05	-9999	-31.1	-0.05	414.729	-9999	-9999
2003	335	77400	78000	77700	88.4	4.9	-31.03	-9999	-31.1	-0.07	403.827	-9999	-9999
2003	335	78000	78600	78300	91.1	4.72	-31.1	-9999	-31.08	0.02	402.889	-9999	-9999
2003	335	78600	79200	78900	89	4.79	-31.01	-9999	-31.05	-0.04	401.231	-9999	-9999
2003	335	79200	79800	79500	86.6	4.83	-31.08	-9999	-31.13	-0.05	397.323	-9999	-9999
2003	335	79800	80400	80100	83.4	4.98	-31.1	-9999	-31.05	0.05	388.31	-9999	-9999
2003	335	80400	81000	80700	86.4	4.99	-31.08	-9999	-31	0.08	390.94	-9999	-9999
2003	335	81000	81600	81300	88.5	4.37	-31.09	-9999	-31.08	0.01	395.54	-9999	-9999
2003	335	81600	82200	81900	90.9	4.05	-31.1	-9999	-31.14	-0.04	407.602	-9999	-9999
2003	335	82200	82800	82500	88.2	4.03	-31.1	-9999	-31.2	-0.1	413.236	-9999	-9999
2003	335	82800	83400	83100	90.8999	4.3	-31.1	-9999	-31.2	-0.1	413.978	-9999	-9999
2003	335	83400	84000	83700	93.3	4.44	-31.1	-9999	-31.17	-0.07	414.544	-9999	-9999
2003	335	84000	84600	84300	91.4997	4.97	-31.1	-9999	-31.1	0	408.193	-9999	-9999
2003	335	84600	85200	84900	92.7	5.09	-31.1	-9999	-31.07	0.03	408.596	-9999	-9999
2003	335	85200	85800	85500	94.1	5.11	-31.13	-9999	-31.03	0.1	412.251	-9999	-9999
2003	335	85800	86400	86100	94.7	4.51	-31.2	-9999	-31.1	0.1	-9999	-9999	-9999
2003	336	0	600	300	90.75	4.56	-31.2	-9999	-31.05	0.15	-9999	-9999	-9999
2003	336	600	1200	900	90.2224	4.51111	-31.1889	-9999	-31	0.188889	-9999	-9999	-9999
2003	336	1200	1800	1500	87.2	4.7	-31.11	-9999	-30.89	0.22	435.23	-9999	-9999
2003	336	1800	2400	2100	86.7	5.18	-30.94	-9999	-30.8	0.14	423.449	-9999	-9999
2003	336	2400	3000	2700	85.6	5.51	-30.79	-9999	-30.7	0.09	410.038	-9999	-9999
2003	336	3000	3600	3300	85.6	5.3	-30.75	-9999	-30.73	0.02	409.758	-9999	-9999
2003	336	3600	4200	3900	92.1002	5.09	-30.74	-9999	-30.7	0.04	416.962	-9999	-9999
2003	336	4200	4800	4500	94.3	5.16	-30.7	-9999	-30.6	0.1	416.604	-9999	-9999
2003	336	4800	5400	5100	94.2	5.38	-30.69	-9999	-30.6	0.09	418.124	-9999	-9999
2003	336	5400	6000	5700	92.8	5.25	-30.75	-9999	-30.6	0.15	426.482	-9999	-9999
2003	336	6000	6600	6300	93.7	5.19	-30.7	-9999	-30.62	0.08	433.747	-9999	-9999
2003	336	6600	7200	6900	96.7	4.93	-30.7	-9999	-30.6	0.1	441.289	-9999	-9999
2003	336	7200	7800	7500	102.8	4.91	-30.7	-9999	-30.62	0.08	444.598	-9999	-9999
2003	336	7800	8400	8100	105.4	4.95	-30.7	-9999	-30.68	0.02	449.244	-9999	-9999
2003	336	8400	9000	8700	103.4	4.89	-30.7	-9999	-30.63	0.07	448.658	-9999	-9999
2003	336	9000	9600	9300	103.7	4.38	-30.7	-9999	-30.7	0	454.32	-9999	-9999
2003	336	9600	10200	9900	100.1	3.62	-30.7	-9999	-30.61	0.09	459.92	-9999	-9999
2003	336	10200	10800	10500	92.3	3.98	-30.7	-9999	-30.6	0.1	464.464	-9999	-9999
2003	336	10800	11400	11100	98.6008	3.76	-30.7	-9999	-30.6	0.1	463.051	-9999	-9999
2003	336	11400	12000	11700	95.4999	3.82	-30.68	-9999	-30.58	0.1	459.351	-9999	-9999
2003	336	12000	12600	12300	92.7	4.16	-30.6	-9999	-30.54	0.06	456.9	-9999	-9999
2003	336	12600	13200	12900	95.4	4.89	-30.6	-9999	-30.55	0.05	450.902	-9999	-9999
2003	336	13200	13800	13500	94.4002	4.97	-30.6	-9999	-30.5	0.1	444.233	-9999	-9999
2003	336	13800	14400	14100	89.8	4.58	-30.53	-9999	-30.5	0.03	446.631	-9999	-9999
2003	336	14400	15000	14700	89.2	4.94	-30.51	-9999	-30.5	0.01	446.713	-9999	-9999
2003	336	15000	15600	15300	88.6	5.37	-30.5	-9999	-30.46	0.04	445.733	-9999	-9999
2003	336	15600	16200	15900	89.9	5.41	-30.5	-9999	-30.4	0.1	446.773	-9999	-9999
2003	336	16200	16800	16500	88	5.32	-30.47	-9999	-30.4	0.07	445.16	-9999	-9999
2003	336	16800	17400	17100	80.5995	4.94	-30.41	-9999	-30.4	0.01	442.626	-9999	-9999
2003	336	17400	18000	17700	80.5	5.14	-30.42	-9999	-30.4	0.02	-9999	-9999	-9999
2003	336	18000	18600	18300	80.7	5.02	-30.4	-9999	-30.33	0.07	-9999	-9999	-9999
2003	336	18600	19200	18900	76.9	5.11	-30.36	-9999	-30.21	0.15	-9999	-9999	-9999
2003	336	19200	19800	19500	73.9	5.43	-30.24	-9999	-30.11	0.13	414.489	-9999	-9999
2003	336	19800	20400	20100	75.5	5.66	-30.16	-9999	-30	0.16	407.856	-9999	-9999
2003	336	20400	21000	20700	77.4	5.54	-30.19	-9999	-30	0.19	402.824	-9999	-9999
2003	336	21000	21600	21300	76.8001	5.29	-30.18	-9999	-30	0.18	400.942	-9999	-9999
2003	336	21600	22200	21900	78.0001	5.35	-30.2	-9999	-30.01	0.19	400.616	-9999	-9999
2003	336	22200	22800	22500	79.2	5.51	-30.16	-9999	-30	0.16	397.818	-9999	-9999
2003	336	22800	23400	23100	73.9996	5.13	-30.1	-9999	-30	0.1	399.358	-9999	-9999
2003	336	23400	24000	23700	74.5001	5.09	-30.1	-9999	-30	0.1	399.071	-9999	-9999
2003	336	24000	24600	24300	78.3	5.11	-30.04	-9999	-29.96	0.08	395.08	-9999	-9999
2003	336	24600	25200	24900	80.7	5.36	-30	-9999	-29.9	0.1	391.487	-9999	-9999
2003	336	25200	25800	25500	81.4	5.46	-29.94	-9999	-29.8	0.14	386.707	-9999	-9999
2003	336	25800	26400	26100	83	5.57	-29.9	-9999	-29.79	0.11	375.996	-9999	-9999
2003	336	26400	27000	26700	81.8	5.52	-29.88	-9999	-29.72	0.16	370.02	-9999	-9999
2003	336	27000	27600	27300	80.7	5.36	-29.84	-9999	-29.7	0.14	369.667	-9999	-9999
2003	336	27600	28200	27900	80.8	5.15	-29.8	-9999	-29.7	0.1	367.109	-9999	-9999
2003	336	28200	28800	28500	82.6	5.37	-29.8	-9999	-29.7	0.1	360.32	-9999	-9999
2003	336	28800	29400	29100	83.2	5.33	-29.8	-9999	-29.7	0.1	362.891	-9999	-9999
2003	336	29400	30000	29700	81.1	5.29	-29.83	-9999	-29.7	0.13	365.091	-9999	-9999
2003	336	30000	30600	30300	80.9	5.25	-29.83	-9999	-29.7	0.13	363.377	-9999	-9999
2003	336	30600	31200	30900	81.6001	5.56	-29.81	-9999	-29.7	0.11	359.86	-9999	-9999
2003	336	31200	31800	31500	85	5.35	-29.9	-9999	-29.76	0.14	365.064	-9999	-9999
2003	336	31800	32400	32100	84.7143	5.12857	-29.9	-9999	-29.8	0.1	370.698	-9999	-9999
2003	336	32400	33000	32700	84.5	5.12	-29.93	-9999	-29.8	0.13	372.611	-9999	-9999
2003	336	33000	33600	33300	82.1	5.41	-29.9	-9999	-29.75	0.15	365.442	-9999	-9999
2003	336	33600	34200	33900	81.1	5.48	-29.9	-9999	-29.71	0.19	360.424	-9999	-9999
2003	336	34200	34800	34500	77.8	5.44	-29.9	-9999	-29.7	0.2	354.762	-9999	-9999
2003	336	34800	35400	35100	77.9	5.43	-29.87	-9999	-29.65	0.22	352.602	-9999	-9999
2003	336	35400	36000	35700	75.5	5.29	-29.8	-9999	-29.62	0.18	-9999	-9999	-9999
2003	336	36000	36600	36300	72.8	5.21	-29.8	-9999	-29.61	0.19	-9999	-9999	-9999
2003	336	36600	37200	36900	74.3	5.21	-29.81	-9999	-29.64	0.17	-9999	-9999	-9999
2003	336	37200	37800	37500	74.8	5.26	-29.82	-9999	-29.61	0.21	353.032	-9999	-9999
2003	336	37800	38400	38100	73.7	5.36	-29.8	-9999	-29.51	0.29	338.936	-9999	-9999
2003	336	38400	39000	38700	75	5.03	-29.71	-9999	-29.46	0.25	326.784	-9999	-9999
2003	336	39000	39600	39300	74.8	5.11	-29.62	-9999	-29.38	0.24	311.304	-9999	-9999
2003	336	39600	40200	39900	76.5	5.31	-29.55	-9999	-29.27	0.28	298.922	-9999	-9999
2003	336	40200	40800	40500	77.1	5.37	-29.5	-9999	-29.22	0.28	295.516	-9999	-9999
2003	336	40800	41400	41100	78.5	5.27	-29.5	-9999	-29.3	0.2	297.407	-9999	-9999
2003	336	41400	42000	41700	76.2	5.39	-29.49	-9999	-29.29	0.2	296.067	-9999	-9999
2003	336	42000	42600	42300	73	5.84	-29.35	-9999	-29.2	0.15	293.756	-9999	-9999
2003	336	42600	43200	42900	72.8	5.99	-29.29	-9999	-29.14	0.15	289.718	-9999	-9999
2003	336	43200	43800	43500	72.2001	6.14	-29.22	-9999	-29.08	0.14	288.269	-9999	-9999
2003	336	43800	44400	44100	70.2	6.29	-29.21	-9999	-29.01	0.2	287.544	-9999	-9999
2003	336	44400	45000	44700	71.2	5.67	-29.21	-9999	-29.02	0.19	289.502	-9999	-9999
2003	336	45000	45600	45300	72.7	5.14	-29.23	-9999	-29	0.23	286.404	-9999	-9999
2003	336	45600	46200	45900	73.7	5.41	-29.12	-9999	-28.87	0.25	277.364	-9999	-9999
2003	336	46200	46800	46500	76.3	6.01	-29.09	-9999	-28.79	0.3	272.349	-9999	-9999
2003	336	46800	47400	47100	74.7003	6.02	-29.05	-9999	-28.8	0.25	277.878	-9999	-9999
2003	336	47400	48000	47700	71.6	6.04	-28.98	-9999	-28.71	0.27	274.409	-9999	-9999
2003	336	48000	48600	48300	69.5	5.96	-28.9	-9999	-28.62	0.28	274.124	-9999	-9999
2003	336	48600	49200	48900	68.5	5.52	-28.86	-9999	-28.6	0.26	271.313	-9999	-9999
2003	336	49200	49800	49500	68.1	5.03	-28.71	-9999	-28.51	0.2	270.458	-9999	-9999
2003	336	49800	50400	50100	69.3	5.45	-28.55	-9999	-28.33	0.22	255.147	-9999	-9999
2003	336	50400	51000	50700	66.4	5.95	-28.41	-9999	-28.19	0.22	244.56	-9999	-9999
2003	336	51000	51600	51300	67.3	5.88	-28.37	-9999	-28.19	0.18	246.02	-9999	-9999
2003	336	51600	52200	51900	67.4	5.5	-28.3	-9999	-28.15	0.15	246.373	-9999	-9999
2003	336	52200	52800	52500	64.6999	6.05	-28.3	-9999	-28.13	0.17	245.767	-9999	-9999
2003	336	52800	53400	53100	67.1001	6.19	-28.21	-9999	-28.03	0.18	254.218	-9999	-9999
2003	336	53400	54000	53700	66.8	6.01	-28.21	-9999	-28.03	0.18	-9999	-9999	-9999
2003	336	54000	54600	54300	66.5	5.84	-28.15	-9999	-27.96	0.19	-9999	-9999	-9999
2003	336	54600	55200	54900	66.4001	6.07	-28.01	-9999	-27.81	0.2	251.318	-9999	-9999
2003	336	55200	55800	55500	63.1	6.46	-27.79	-9999	-27.57	0.22	241.609	-9999	-9999
2003	336	55800	56400	56100	62.9	6.96	-27.64	-9999	-27.43	0.21	227.002	-9999	-9999
2003	336	56400	57000	56700	65.1999	6.36	-27.6	-9999	-27.4	0.2	227.996	-9999	-9999
2003	336	57000	57600	57300	69.3003	5.84	-27.66	-9999	-27.52	0.14	242.316	-9999	-9999
2003	336	57600	58200	57900	70.6999	5.79	-27.71	-9999	-27.58	0.13	250.911	-9999	-9999
2003	336	58200	58800	58500	70	5.8	-27.73	-9999	-27.6	0.13	253.489	-9999	-9999
2003	336	58800	59400	59100	72.4	5.48	-27.71	-9999	-27.56	0.15	250.449	-9999	-9999
2003	336	59400	60000	59700	74.7	5.41	-27.67	-9999	-27.5	0.17	250.324	-9999	-9999
2003	336	60000	60600	60300	74	5.29	-27.6	-9999	-27.5	0.1	247.987	-9999	-9999
2003	336	60600	61200	60900	69.8	5.59	-27.66	-9999	-27.5	0.16	251.731	-9999	-9999
2003	336	61200	61800	61500	66.1999	6.17	-27.63	-9999	-27.46	0.17	257.704	-9999	-9999
2003	336	61800	62400	62100	65.7001	6.38	-27.6	-9999	-27.38	0.22	245.855	-9999	-9999
2003	336	62400	63000	62700	62.5	5.97	-27.69	-9999	-27.46	0.23	258.122	-9999	-9999
2003	336	63000	63600	63300	62.7	6.2	-27.61	-9999	-27.33	0.28	253.182	-9999	-9999
2003	336	63600	64200	63900	63.2	6.16	-27.6	-9999	-27.32	0.28	254.331	-9999	-9999
2003	336	64200	64800	64500	63.3	6.16	-27.49	-9999	-27.19	0.3	240.169	-9999	-9999
2003	336	64800	65400	65100	62.4	6.46	-27.41	-9999	-27.16	0.25	236.047	-9999	-9999
2003	336	65400	66000	65700	61.3	6.67	-27.4	-9999	-27.1	0.3	234.853	-9999	-9999
2003	336	66000	66600	66300	60.4	6.78	-27.38	-9999	-27.09	0.29	234.34	-9999	-9999
2003	336	66600	67200	66900	58.3	6.86	-27.29	-9999	-27.01	0.28	228.524	-9999	-9999
2003	336	67200	67800	67500	54.7	7.19	-27.18	-9999	-26.85	0.33	221.74	-9999	-9999
2003	336	67800	68400	68100	50.8	7.36	-27.11	-9999	-26.76	0.35	216.136	-9999	-9999
2003	336	68400	69000	68700	49.9	7.38	-27.13	-9999	-26.8	0.33	218.842	-9999	-9999
2003	336	69000	69600	69300	50.2	7.34	-27.14	-9999	-26.78	0.36	226.409	-9999	-9999
2003	336	69600	70200	69900	52.3	7.16	-27.16	-9999	-26.75	0.41	219.498	-9999	-9999
2003	336	70200	70800	70500	54.6	6.86	-27.11	-9999	-26.78	0.33	222.413	-9999	-9999
2003	336	70800	71400	71100	55	6.7	-27.14	-9999	-26.82	0.32	229.431	-9999	-9999
2003	336	71400	72000	71700	57	6.54	-27.21	-9999	-26.92	0.29	-9999	-9999	-9999
2003	336	72000	72600	72300	59.1	6.41	-27.29	-9999	-27	0.29	283.987	-9999	-9999
2003	336	72600	73200	72900	57.8	6.56	-27.31	-9999	-27	0.31	269.82	-9999	-9999
2003	336	73200	73800	73500	57.8	6.73	-27.25	-9999	-26.95	0.3	251.176	-9999	-9999
2003	336	73800	74400	74100	58.9	6.65	-27.18	-9999	-26.93	0.25	237.442	-9999	-9999
2003	336	74400	75000	74700	59.2	6.7	-27.17	-9999	-26.87	0.3	229.151	-9999	-9999
2003	336	75000	75600	75300	58.9	6.33	-27.08	-9999	-26.83	0.25	225.61	-9999	-9999
2003	336	75600	76200	75900	61.2	6.17	-27.19	-9999	-26.8	0.39	228.197	-9999	-9999
2003	336	76200	76800	76500	63.8	6.22	-27.18	-9999	-26.8	0.38	230.2	-9999	-9999
2003	336	76800	77400	77100	64.7	5.94	-27.23	-9999	-26.98	0.25	235.036	-9999	-9999
2003	336	77400	78000	77700	63.8	5.89	-27.33	-9999	-27.14	0.19	240.171	-9999	-9999
2003	336	78000	78600	78300	63.9	5.95	-27.43	-9999	-27.08	0.35	232.702	-9999	-9999
2003	336	78600	79200	78900	61.2	6.05	-27.34	-9999	-27.09	0.25	227.056	-9999	-9999
2003	336	79200	79800	79500	58.5	6.47	-27.29	-9999	-27.1	0.19	222.096	-9999	-9999
2003	336	79800	80400	80100	59.6	6.57	-27.43	-9999	-27.2	0.23	233.962	-9999	-9999
2003	336	80400	81000	80700	57.4	6.8	-27.55	-9999	-27.26	0.29	231.329	-9999	-9999
2003	336	81000	81600	81300	58.9	7.09	-27.49	-9999	-27.2	0.29	228.018	-9999	-9999
2003	336	81600	82200	81900	59.9	7.09	-27.46	-9999	-27.23	0.23	228.667	-9999	-9999
2003	336	82200	82800	82500	56.8	7.08	-27.54	-9999	-27.32	0.22	232.529	-9999	-9999
2003	336	82800	83400	83100	53.6	7.37	-27.45	-9999	-27.28	0.17	225.66	-9999	-9999
2003	336	83400	84000	83700	51.9	7.49	-27.52	-9999	-27.27	0.25	222.664	-9999	-9999
2003	336	84000	84600	84300	50.9	8.1	-27.31	-9999	-27.02	0.29	202.451	-9999	-9999
2003	336	84600	85200	84900	52.7	8.07	-27.21	-9999	-26.91	0.3	192.656	-9999	-9999
2003	336	85200	85800	85500	52.5	7.98	-27.2	-9999	-26.81	0.39	183.658	-9999	-9999
2003	336	85800	86400	86100	52.8	8.19	-27.21	-9999	-26.86	0.35	182.182	-9999	-9999
2003	337	0	600	300	54.6	7.85	-27.27	-9999	-26.98	0.29	187.62	-9999	-9999
2003	337	600	1200	900	54.1	8.14	-27.3	-9999	-26.9	0.4	183.233	-9999	-9999
2003	337	1200	1800	1500	55	8.03	-27.36	-9999	-26.91	0.45	189.782	-9999	-9999
2003	337	1800	2400	2100	50.7	8.14	-27.23	-9999	-26.81	0.42	184.484	-9999	-9999
2003	337	2400	3000	2700	51.3	8.26	-27.19	-9999	-26.91	0.28	184.517	-9999	-9999
2003	337	3000	3600	3300	49.6	7.9	-27.22	-9999	-27.01	0.21	-9999	-9999	-9999
2003	337	3600	4200	3900	50.5	7.72	-27.3	-9999	-27	0.3	-9999	-9999	-9999
2003	337	4200	4800	4500	50.4	7.63	-27.22	-9999	-26.89	0.33	-9999	-9999	-9999
2003	337	4800	5400	5100	50.1	7.79	-27.17	-9999	-26.83	0.34	193.057	-9999	-9999
2003	337	5400	6000	5700	50.8	7.61	-27.25	-9999	-26.92	0.33	188.791	-9999	-9999
2003	337	6000	6600	6300	51.4	7.34	-27.25	-9999	-27.01	0.24	188.584	-9999	-9999
2003	337	6600	7200	6900	53.3	7.33	-27.3	-9999	-27.01	0.29	190.711	-9999	-9999
2003	337	7200	7800	7500	50.6998	7.19	-27.34	-9999	-27.05	0.29	195.656	-9999	-9999
2003	337	7800	8400	8100	47.1	7.3	-27.4	-9999	-27.08	0.32	197.307	-9999	-9999
2003	337	8400	9000	8700	46.5	7.13	-27.4	-9999	-27.08	0.32	197.418	-9999	-9999
2003	337	9000	9600	9300	47.3	6.87	-27.44	-9999	-27.12	0.32	202.262	-9999	-9999
2003	337	9600	10200	9900	50.4	6.56	-27.52	-9999	-27.2	0.32	209.709	-9999	-9999
2003	337	10200	10800	10500	49.7	6.63	-27.53	-9999	-27.2	0.33	210.22	-9999	-9999
2003	337	10800	11400	11100	52.1	6.74	-27.53	-9999	-27.2	0.33	216.08	-9999	-9999
2003	337	11400	12000	11700	55.6999	6.77	-27.6	-9999	-27.24	0.36	216.767	-9999	-9999
2003	337	12000	12600	12300	58.0001	6.69	-27.66	-9999	-27.29	0.37	226.38	-9999	-9999
2003	337	12600	13200	12900	53.4	6.92	-27.56	-9999	-27.13	0.43	222.549	-9999	-9999
2003	337	13200	13800	13500	56.7	6.75	-27.55	-9999	-27.17	0.38	227.438	-9999	-9999
2003	337	13800	14400	14100	58.4001	6.72	-27.6	-9999	-27.23	0.37	230.542	-9999	-9999
2003	337	14400	15000	14700	57.7	6.9	-27.61	-9999	-27.27	0.34	238.296	-9999	-9999
2003	337	15000	15600	15300	57.6	6.4	-27.77	-9999	-27.46	0.31	255.549	-9999	-9999
2003	337	15600	16200	15900	57.4	6.45	-27.74	-9999	-27.41	0.33	262.962	-9999	-9999
2003	337	16200	16800	16500	59.3	6.06	-27.78	-9999	-27.56	0.22	271.962	-9999	-9999
2003	337	16800	17400	17100	57.1	6.14	-27.82	-9999	-27.6	0.22	269.329	-9999	-9999
2003	337	17400	18000	17700	55	6.74286	-27.8	-9999	-27.5143	0.285714	264.298	-9999	-9999
2003	337	18000	18600	18300	53.9	6.98	-27.77	-9999	-27.46	0.31	261.396	-9999	-9999
2003	337	18600	19200	18900	55.1	6.89	-27.7	-9999	-27.4	0.3	261.422	-9999	-9999
2003	337	19200	19800	19500	56.3	6.5	-27.77	-9999	-27.47	0.3	263.511	-9999	-9999
2003	337	19800	20400	20100	57.5	6.63	-27.81	-9999	-27.5	0.31	264.991	-9999	-9999
2003	337	20400	21000	20700	55.2	6.77	-27.86	-9999	-27.46	0.4	265.003	-9999	-9999
2003	337	21000	21600	21300	54.9	6.87	-27.8	-9999	-27.48	0.32	-9999	-9999	-9999
2003	337	21600	22200	21900	56.1	6.54	-27.8	-9999	-27.49	0.31	-9999	-9999	-9999
2003	337	22200	22800	22500	55.5	6.31	-27.81	-9999	-27.58	0.23	298.085	-9999	-9999
2003	337	22800	23400	23100	56	6.6	-27.8	-9999	-27.53	0.27	285.887	-9999	-9999
2003	337	23400	24000	23700	55	6.62	-27.8	-9999	-27.42	0.38	280.131	-9999	-9999
2003	337	24000	24600	24300	55.9	6.3	-27.8	-9999	-27.52	0.28	285.729	-9999	-9999
2003	337	24600	25200	24900	58.8	5.89	-27.85	-9999	-27.62	0.23	298.32	-9999	-9999
2003	337	25200	25800	25500	58	5.64	-27.96	-9999	-27.76	0.2	310.373	-9999	-9999
2003	337	25800	26400	26100	56.6	5.57	-28	-9999	-27.8	0.2	314.456	-9999	-9999
2003	337	26400	27000	26700	54.4	5.34	-28	-9999	-27.8	0.2	315.442	-9999	-9999
2003	337	27000	27600	27300	54.7	5.12	-27.95	-9999	-27.74	0.21	310.918	-9999	-9999
2003	337	27600	28200	27900	54.2	4.95	-27.93	-9999	-27.7	0.23	309.004	-9999	-9999
2003	337	28200	28800	28500	55	4.8	-27.94	-9999	-27.71	0.23	310.764	-9999	-9999
2003	337	28800	29400	29100	55.7001	4.4	-27.94	-9999	-27.7	0.24	314.151	-9999	-9999
2003	337	29400	30000	29700	56.8	4.07	-27.99	-9999	-27.77	0.22	321.753	-9999	-9999
2003	337	30000	30600	30300	61.6	4.36	-28.01	-9999	-27.8	0.21	331.156	-9999	-9999
2003	337	30600	31200	30900	63.2	4.42	-28	-9999	-27.8	0.2	330.056	-9999	-9999
2003	337	31200	31800	31500	64.6	4.74	-27.95	-9999	-27.8	0.15	323.749	-9999	-9999
2003	337	31800	32400	32100	64.5	5.76	-27.9	-9999	-27.74	0.16	315.102	-9999	-9999
2003	337	32400	33000	32700	64.7	6.25	-27.9	-9999	-27.7	0.2	317.164	-9999	-9999
2003	337	33000	33600	33300	63.4	5.81	-27.89	-9999	-27.67	0.22	317.12	-9999	-9999
2003	337	33600	34200	33900	60.3001	6.11	-27.77	-9999	-27.53	0.24	308.007	-9999	-9999
2003	337	34200	34800	34500	59.3	6.19	-27.67	-9999	-27.44	0.23	301.62	-9999	-9999
2003	337	34800	35400	35100	58.3	6.2	-27.73	-9999	-27.45	0.28	309.278	-9999	-9999
2003	337	35400	36000	35700	58.6999	5.46	-27.8	-9999	-27.6	0.2	317.531	-9999	-9999
2003	337	36000	36600	36300	60.4	5.17	-27.84	-9999	-27.62	0.22	325.458	-9999	-9999
2003	337	36600	37200	36900	61.7	5.52	-27.84	-9999	-27.62	0.22	325.516	-9999	-9999
2003	337	37200	37800	37500	63.9	5.51	-27.81	-9999	-27.59	0.22	325.004	-9999	-9999
2003	337	37800	38400	38100	63.7	5.14	-27.9	-9999	-27.63	0.27	326.253	-9999	-9999
2003	337	38400	39000	38700	62.9	5.47	-27.83	-9999	-27.59	0.24	323.138	-9999	-9999
2003	337	39000	39600	39300	62.3	5.74	-27.8	-9999	-27.53	0.27	-9999	-9999	-9999
2003	337	39600	40200	39900	62.8	6.08	-27.77	-9999	-27.47	0.3	376.932	-9999	-9999
2003	337	40200	40800	40500	62	6.05	-27.7	-9999	-27.42	0.28	348.282	-9999	-9999
2003	337	40800	41400	41100	62.4	5.79	-27.72	-9999	-27.44	0.28	336.078	-9999	-9999
2003	337	41400	42000	41700	63.2	5.86	-27.7	-9999	-27.4	0.3	330.773	-9999	-9999
2003	337	42000	42600	42300	63.2999	5.7	-27.67	-9999	-27.35	0.32	327.518	-9999	-9999
2003	337	42600	43200	42900	64.3	5.79	-27.6	-9999	-27.3	0.3	324.293	-9999	-9999
2003	337	43200	43800	43500	63.2	6.06	-27.62	-9999	-27.22	0.4	323.791	-9999	-9999
2003	337	43800	44400	44100	62.9	5.48	-27.58	-9999	-27.29	0.29	319.519	-9999	-9999
2003	337	44400	45000	44700	60.8	6.42	-27.46	-9999	-27.06	0.4	312.276	-9999	-9999
2003	337	45000	45600	45300	62.1	6.23	-27.39	-9999	-27.01	0.38	307.871	-9999	-9999
2003	337	45600	46200	45900	63.4	5.98	-27.4	-9999	-27.05	0.35	310.753	-9999	-9999
2003	337	46200	46800	46500	63.7	6.25	-27.31	-9999	-26.99	0.32	304.558	-9999	-9999
2003	337	46800	47400	47100	63.6	5.94	-27.3	-9999	-26.99	0.31	305.564	-9999	-9999
2003	337	47400	48000	47700	63.6	5.84	-27.3	-9999	-27.03	0.27	309.707	-9999	-9999
2003	337	48000	48600	48300	63.3001	6.05	-27.3	-9999	-27	0.3	311.18	-9999	-9999
2003	337	48600	49200	48900	61.8	6.05	-27.27	-9999	-26.95	0.32	305.369	-9999	-9999
2003	337	49200	49800	49500	61.2	5.72	-27.2	-9999	-26.94	0.26	305.549	-9999	-9999
2003	337	49800	50400	50100	61.6	5.58	-27.2	-9999	-26.94	0.26	303.816	-9999	-9999
2003	337	50400	51000	50700	62.2	5.78	-27.17	-9999	-26.93	0.24	300.169	-9999	-9999
2003	337	51000	51600	51300	64.3	5.75	-27.15	-9999	-26.88	0.27	296.413	-9999	-9999
2003	337	51600	52200	51900	62.9	5.98	-27.14	-9999	-26.87	0.27	292.104	-9999	-9999
2003	337	52200	52800	52500	63.5	5.7	-27.04	-9999	-26.85	0.19	288.756	-9999	-9999
2003	337	52800	53400	53100	64.3	5.76	-27.1	-9999	-26.87	0.23	289.167	-9999	-9999
2003	337	53400	54000	53700	64	5.99	-27.1	-9999	-26.83	0.27	284.049	-9999	-9999
2003	337	54000	54600	54300	64.3	6.01	-27.04	-9999	-26.8	0.24	280.618	-9999	-9999
2003	337	54600	55200	54900	63.6	6.36	-26.99	-9999	-26.78	0.21	273.7	-9999	-9999
2003	337	55200	55800	55500	62.8	6.43	-27	-9999	-26.73	0.27	269.189	-9999	-9999
2003	337	55800	56400	56100	62.2	6.12	-26.91	-9999	-26.69	0.22	265.702	-9999	-9999
2003	337	56400	57000	56700	63.7	6.17	-26.94	-9999	-26.78	0.16	273.061	-9999	-9999
2003	337	57000	57600	57300	65.2999	6.27	-27.01	-9999	-26.79	0.22	-9999	-9999	-9999
2003	337	57600	58200	57900	67.6999	6.01	-27.13	-9999	-26.87	0.26	346.523	-9999	-9999
2003	337	58200	58800	58500	65.7	6.35	-27.1	-9999	-26.85	0.25	320.047	-9999	-9999
2003	337	58800	59400	59100	66.1	6.2	-27.02	-9999	-26.8	0.22	302.753	-9999	-9999
2003	337	59400	60000	59700	66	6.1	-27.07	-9999	-26.85	0.22	293.756	-9999	-9999
2003	337	60000	60600	60300	66	5.96	-27.06	-9999	-26.85	0.21	286.918	-9999	-9999
2003	337	60600	61200	60900	68.0001	6.11	-27.09	-9999	-26.87	0.22	291.218	-9999	-9999
2003	337	61200	61800	61500	68.7	6.13	-27.19	-9999	-26.98	0.21	298.869	-9999	-9999
2003	337	61800	62400	62100	69.5	6.37	-27.19	-9999	-26.88	0.31	295.8	-9999	-9999
2003	337	62400	63000	62700	69.8	6.1	-27.12	-9999	-26.88	0.24	292.438	-9999	-9999
2003	337	63000	63600	63300	68.5	5.76	-27.1	-9999	-26.89	0.21	287.264	-9999	-9999
2003	337	63600	64200	63900	68.9	5.49	-27.11	-9999	-26.83	0.28	289.907	-9999	-9999
2003	337	64200	64800	64500	67.0001	5.53	-27.03	-9999	-26.76	0.27	284.7	-9999	-9999
2003	337	64800	65400	65100	69.0003	5.89	-26.91	-9999	-26.67	0.24	281.387	-9999	-9999
2003	337	65400	66000	65700	71.6	6.07	-26.99	-9999	-26.79	0.2	289.116	-9999	-9999
2003	337	66000	66600	66300	67.7	6.09	-27.01	-9999	-26.73	0.28	291.776	-9999	-9999
2003	337	66600	67200	66900	69.9	6.14	-26.95	-9999	-26.6	0.35	290.016	-9999	-9999
2003	337	67200	67800	67500	70.6	5.87	-26.91	-9999	-26.69	0.22	287.6	-9999	-9999
2003	337	67800	68400	68100	69	6.44	-26.9	-9999	-26.66	0.24	283.516	-9999	-9999
2003	337	68400	69000	68700	69.3	6.92	-26.88	-9999	-26.6	0.28	283.518	-9999	-9999
2003	337	69000	69600	69300	71.3	6.32	-26.91	-9999	-26.69	0.22	290.107	-9999	-9999
2003	337	69600	70200	69900	73.3	6.18	-26.96	-9999	-26.7	0.26	291.822	-9999	-9999
2003	337	70200	70800	70500	74.8	6.08	-26.98	-9999	-26.61	0.37	291.22	-9999	-9999
2003	337	70800	71400	71100	76.3	5.67	-26.94	-9999	-26.63	0.31	289.969	-9999	-9999
2003	337	71400	72000	71700	80.1	5.53	-26.97	-9999	-26.7	0.27	289.756	-9999	-9999
2003	337	72000	72600	72300	80.6	5.65	-26.91	-9999	-26.61	0.3	285.549	-9999	-9999
2003	337	72600	73200	72900	81.2	5.57	-26.87	-9999	-26.6	0.27	281.84	-9999	-9999
2003	337	73200	73800	73500	80.7	5.43	-26.9	-9999	-26.6	0.3	284.182	-9999	-9999
2003	337	73800	74400	74100	84.3	4.94	-26.93	-9999	-26.65	0.28	292.571	-9999	-9999
2003	337	74400	75000	74700	82.8001	4.91	-26.95	-9999	-26.75	0.2	298.481	-9999	-9999
2003	337	75000	75600	75300	80.8	5.52	-26.99	-9999	-26.73	0.26	-9999	-9999	-9999
2003	337	75600	76200	75900	80.4	5.38	-27.02	-9999	-26.81	0.21	365.129	-9999	-9999
[truncated: 4,049 more rows]

## Sheet: readme
Variable	unit	Definition	Missing data code
Year		Year of the field deployment
jday	day	Julian day of the sampling day
tst	sec.	Start of the 10 min. interval in GMT
tsp	sec.	End of the 10 min. interval in GMT
tmid	sec.	Mid point of the 10 min. interval in GMT	-9999
WD	deg.	Circular average of Wind direction (assumed untiy wind speed) measured at 10 m above surface	-9999
WS	m/s	Arithmetic average of wind speed measured at 10 m above surface	-9999
Temp_2	deg. C	Ambient Temperatue at 2 m above surface	-9999
Temp_10	deg. C	Ambient Temperatue at 10 m above surface	-9999
Temp_22	deg. C	Ambient Temperatue at 22 m above surface	-9999
delta_T	deg. C	Temperature difference between 22 m and 2 m	-9999
NO	pptv	Ambient NO mixing ration averaged in 10 min intervals	-9999
NO2	pptv	Ambient NO2 mixing ration averaged in 10 min intervals	-9999
NOy	pptv	Ambient NOy mixing ration averaged in 10 min intervals	-9999
