# Supplementary material for: The meteorology and chemistry of high nitrogen oxide concentrations in the stable boundary layer at the South Pole
Source: Copernicus journal article supplement (doi:10.5194/acp-18-3755-2018), 2018-03-14
Supplement: Supplementary file 2 [file acp-18-3755-2018-supplement.zip]

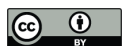

## *Supplement of*

# **The meteorology and chemistry of high nitrogen oxide concentrations in the stable boundary layer at the South Pole**

**William Neff et al.**

*Correspondence to:* William Neff ([william.neff@noaa.gov](mailto:william.neff@noaa.gov))

- [acp-18-3755-2018-supplement-title-page.pdf](#)
- [ANTCI\\_met\\_NO\\_merge\\_2003.xlsx](#)
- [ANTCI\\_met\\_NO\\_merge\\_2006.xlsx](#)
- [ISCAT\\_Met\\_NO\\_Merge\\_2000.xlsx](#)
- [ISCAT\\_Met\\_NO\\_merge\\_1998.xlsx](#)
- [SODAR\\_1993.xls](#)
- [SODAR\\_2003.xls](#)
- [Supplemental Figures\\_Neff et al..pdf](#)

The copyright of individual parts of the supplement might differ from the CC BY 4.0 License.
