# Supplementary material for: The meteorology and chemistry of high nitrogen oxide concentrations in the stable boundary layer at the South Pole
Source: Copernicus journal article supplement (doi:10.5194/acp-18-3755-2018), 2018-03-14
Supplement: Supplementary file 3 [file ANTCI_met_NO_merge_2006.xlsx]

## Sheet: Merge
Year	jday	tst	tsp	tmid	WD	WS	Temp_2	Temp_10	Temp_22	DeltaT	NO	NO2	NOy
2006	244	0	600	300	68.1667	4.46667	-73.7167	-71.25	-67.4667	6.25	-9.07282	-9999	50.3531
2006	244	600	1200	900	56.7	4.86	-73.52	-71.04	-66.84	6.68	-9999	-9999	49.2287
2006	244	1200	1800	1500	52.7	4.79	-73	-70.86	-66.56	6.44	-3.36723	-9999	50.5716
2006	244	1800	2400	2100	64.7	4.69	-73.25	-71.11	-67.63	5.62	-2.57318	-9999	49.9202
2006	244	2400	3000	2700	65.1	4.89	-73.43	-71.34	-67.96	5.47	-5.10881	-9999	48.5751
2006	244	3000	3600	3300	70.8	4.64	-73.79	-71.43	-68.3	5.49	-2.53397	-9999	50.1493
2006	244	3600	4200	3900	67	4.57	-74.52	-71.51	-68.39	6.13	-7.27791	-9999	47.9884
2006	244	4200	4800	4500	62.8	4.77	-74.52	-71.67	-67.91	6.61	-4.40485	-9999	49.24
2006	244	4800	5400	5100	60	4.67	-74.32	-71.89	-67.97	6.35	-4.0613	-9999	50.4747
2006	244	5400	6000	5700	60.7	4.26	-74.36	-71.95	-68.07	6.29	-5.56063	-9999	48.7953
2006	244	6000	6600	6300	81.3	4.09	-74.88	-71.99	-69.41	5.47	-6.44796	-9999	47.6084
2006	244	6600	7200	6900	80.6	4.46	-75.17	-71.9	-68.92	6.25	-5.89372	-9999	44.9636
2006	244	7200	7800	7500	83.4	4.06	-75.41	-72.24	-69.49	5.92	-6.38777	-9999	46.9262
2006	244	7800	8400	8100	91.75	4.1125	-74.6556	-72.089	-70.3	4.35556	-4.26339	-9999	48.9742
2006	244	8400	9000	8700	76.8	4.67	-74.06	-71.44	-69.34	4.72	-5.05734	-9999	48.3268
2006	244	9000	9600	9300	71.2	4.69	-73.74	-71.28	-69.15	4.59	-5.85252	-9999	47.9223
2006	244	9600	10200	9900	75.1	4.76	-74.04	-71.38	-69.36	4.68	-6.2642	-9999	46.7682
2006	244	10200	10800	10500	69.7	4.75	-73.87	-71.28	-68.6	5.27	-5.07479	-9999	48.072
2006	244	10800	11400	11100	65.1	4.49	-73.69	-71.49	-67.75	5.94	-5.9823	-9999	47.8645
2006	244	11400	12000	11700	64.8333	4.41667	-73.8333	-71.633	-67.2667	6.56667	-2.62719	-9999	49.9585
2006	244	12000	12600	12300	77.3333	4.04444	-74.4556	-72.222	-68.4444	6.01111	-4.99155	-9999	50.3917
2006	244	12600	13200	12900	79.5	4.65	-74.5625	-72.025	-68.725	5.8375	-5.24402	-9999	51.074
2006	244	13200	13800	13500	75.3	4.91	-74.34	-71.85	-68.13	6.21	-4.88096	-9999	50.036
2006	244	13800	14400	14100	68.4	5.08	-74.2	-71.91	-67.57	6.63	-6.18219	-9999	49.6662
2006	244	14400	15000	14700	71	5	-74.06	-72.18	-67.9	6.16	-5.71295	-9999	49.7281
2006	244	15000	15600	15300	67.3	5.14	-74.03	-72.5	-67.63	6.4	-6.14873	-9999	45.1439
2006	244	15600	16200	15900	59.5	5.18	-73.92	-72.27	-67.38	6.54	-5.80034	-9999	45.6917
2006	244	16200	16800	16500	50.8	4.83	-73.57	-71.66	-66.79	6.78	-5.68145	-9999	45.3648
2006	244	16800	17400	17100	72.8	3.52	-74.37	-73.09	-69.26	5.11	-4.29863	-9999	47.9407
2006	244	17400	18000	17700	69.8	4.28	-75.03	-72.65	-68.66	6.37	-4.66852	-9999	47.2775
2006	244	18000	18600	18300	62	4.28	-75.09	-72.27	-68.38	6.71	-9999	-9999	-9999
2006	244	18600	19200	18900	70.4	4.01	-75.8	-73.25	-68.97	6.83	-9999	-9999	-9999
2006	244	19200	19800	19500	61.9	4.29	-75.58	-72.7	-68.87	6.71	-2.74294	-9999	64.6387
2006	244	19800	20400	20100	66.9	4.12	-75.66	-72.49	-68.78	6.88	-3.22536	-9999	58.6068
2006	244	20400	21000	20700	68	3.82	-75.61	-72.64	-68.88	6.73	-2.99476	-9999	53.0051
2006	244	21000	21600	21300	66.2	4.12	-75.68	-72.56	-68.19	7.49	-9999	-9999	51.9887
2006	244	21600	22200	21900	57.1	4.66	-75.5	-71.76	-67.41	8.09	-8.56938	-9999	51.9671
2006	244	22200	22800	22500	68.7	4.43	-75.42	-72.04	-67.52	7.9	-4.2862	-9999	55.0011
2006	244	22800	23400	23100	78.1	4.97	-75.16	-72.09	-68.78	6.38	-6.19426	-9999	50.5798
2006	244	23400	24000	23700	66.9	5.17	-74.37	-71.68	-67.94	6.43	-4.51061	-9999	49.6577
2006	244	24000	24600	24300	75.7	4.76	-74.29	-71.86	-68.46	5.83	-4.47743	-9999	50.2668
2006	244	24600	25200	24900	79.4	4.68	-74.6	-71.74	-69.12	5.48	-7.34717	-9999	49.1656
2006	244	25200	25800	25500	82.9	4.61	-75.05	-71.74	-69.89	5.16	-5.00146	-9999	53.3253
2006	244	25800	26400	26100	80.4	4.73	-75.99	-71.71	-69.49	6.5	-5.19252	-9999	48.1292
2006	244	26400	27000	26700	71.3	5.43	-74.68	-71.45	-68.26	6.42	-4.99699	-9999	48.2114
2006	244	27000	27600	27300	67.8	5.19	-73.99	-71.78	-67.66	6.33	-4.36326	-9999	42.5692
2006	244	27600	28200	27900	66	4.83	-73.99	-72.39	-67.75	6.24	-7.91696	-9999	41.4511
2006	244	28200	28800	28500	67.6	4.55	-74.06	-72.63	-68.06	6	-3.3871	-9999	44.4392
2006	244	28800	29400	29100	71	4.43	-74.4	-72.87	-68.42	5.98	-6.31764	-9999	45.1604
2006	244	29400	30000	29700	67	4.63	-74.59	-72.93	-67.73	6.86	-4.61112	-9999	49.4334
2006	244	30000	30600	30300	65	5.15	-74.67	-72.84	-67.02	7.65	-5.8269	-9999	49.1826
2006	244	30600	31200	30900	56.6	5.59	-73.75	-72.18	-66.12	7.63	-8.0403	-9999	46.0582
2006	244	31200	31800	31500	54.9	5.16	-73.34	-71.89	-65.88	7.46	-6.40023	-9999	45.706
2006	244	31800	32400	32100	57.3	4.81	-73.32	-71.83	-66.65	6.67	-7.46081	-9999	48.0785
2006	244	32400	33000	32700	58.5	4.75	-73.6	-72.02	-67.1	6.5	-6.37766	-9999	46.6681
2006	244	33000	33600	33300	66.2	4.47	-74.05	-72.5	-67.85	6.2	-2.13777	-9999	47.1249
2006	244	33600	34200	33900	66.2	4.57	-74.23	-72.95	-68.13	6.1	-7.64811	-9999	48.1902
2006	244	34200	34800	34500	59.7	4.65	-73.85	-72.56	-67.88	5.97	-7.85148	-9999	48.0606
2006	244	34800	35400	35100	62.4	4.68	-73.82	-72.62	-67.9	5.92	-6.91957	-9999	47.7094
2006	244	35400	36000	35700	59.7	4.78	-73.87	-72.54	-67.43	6.44	-4.07115	-9999	46.6081
2006	244	36000	36600	36300	57.9	4.92	-73.54	-72.25	-67.17	6.37	-4.36554	-9999	47.8977
2006	244	36600	37200	36900	57.6	4.88	-73.4	-71.98	-66.51	6.89	-6.10057	-9999	44.2829
2006	244	37200	37800	37500	54.7	5.23	-73.42	-71.8	-66.7	6.72	-6.89367	-9999	47.4339
2006	244	37800	38400	38100	51.2	5.26	-73.35	-71.41	-66.55	6.8	-5.5163	-9999	47.2305
2006	244	38400	39000	38700	49	5.26	-72.95	-70.94	-66.98	5.97	-5.38375	-9999	48.3582
2006	244	39000	39600	39300	62	4.59	-73.32	-71.79	-67.87	5.45	-4.42245	-9999	48.1447
2006	244	39600	40200	39900	71.8	5.05	-74.28	-72.43	-67.95	6.33	-3.82996	-9999	48.0583
2006	244	40200	40800	40500	67	5.31	-74.59	-72.36	-67.65	6.94	-5.05466	-9999	46.7725
2006	244	40800	41400	41100	61.7	5.41	-74.48	-72.55	-66.51	7.97	-5.33365	-9999	46.3657
2006	244	41400	42000	41700	56	5.61	-74.2	-72.46	-66.67	7.53	-7.90842	-9999	48.447
2006	244	42000	42600	42300	54.9	5.63	-73.81	-72.1	-66.51	7.3	-5.48029	-9999	46.6756
2006	244	42600	43200	42900	57.7	5.38	-73.46	-72.08	-66.81	6.65	-4.44991	-9999	47.5527
2006	244	43200	43800	43500	59.4	5.77	-73.29	-71.84	-66.82	6.47	-7.58727	-9999	46.5336
2006	244	43800	44400	44100	60	5.34286	-73.275	-71.888	-66.875	6.4	-5.79007	-9999	46.3876
2006	244	44400	45000	44700	52.5556	5.81111	-73.1444	-71.322	-66.5111	6.63333	-5.46962	-9999	47.895
2006	244	45000	45600	45300	46.9	5.37	-72.68	-70.93	-66.69	5.99	-3.528	-9999	47.7846
2006	244	45600	46200	45900	48.7	4.76	-72.55	-70.67	-67.46	5.09	-2.63937	-9999	47.6141
2006	244	46200	46800	46500	50.7	4.66	-72.8	-70.51	-67.56	5.24	-6.4876	-9999	47.1257
2006	244	46800	47400	47100	57	4.28	-73.63	-71.17	-67.64	5.99	-2.19655	-9999	51.3283
2006	244	47400	48000	47700	59.4	4.75	-74	-71.55	-67.15	6.85	-3.03983	-9999	49.491
2006	244	48000	48600	48300	62.3	4.87	-74.01	-72.16	-67.25	6.76	-6.7688	-9999	47.8663
2006	244	48600	49200	48900	60	5.16	-73.95	-72.02	-66.74	7.21	-7.01165	-9999	46.6105
2006	244	49200	49800	49500	62.7	5.4	-73.63	-72.22	-66.73	6.9	-7.57047	-9999	47.6539
2006	244	49800	50400	50100	59.7	5.7	-73.35	-71.97	-67.02	6.33	-7.6231	-9999	48.2546
2006	244	50400	51000	50700	60	5.64	-73.25	-71.98	-66.85	6.4	-2.18308	-9999	49.1909
2006	244	51000	51600	51300	59.6	5.71	-73.11	-71.81	-66.79	6.32	-5.35964	-9999	48.7941
2006	244	51600	52200	51900	57.8	5.76	-73.02	-71.63	-66.14	6.88	-5.22922	-9999	48.6172
2006	244	52200	52800	52500	53.2	5.87	-73	-71.44	-65.97	7.03	-4.81656	-9999	49.3846
2006	244	52800	53400	53100	51.5	5.47	-72.87	-71.2	-65.94	6.93	-5.02245	-9999	49.52
2006	244	53400	54000	53700	53.4	5.12	-72.87	-70.92	-66.12	6.75	-5.21612	-9999	49.2778
2006	244	54000	54600	54300	56.3	4.96	-73.05	-71.28	-66.3	6.75	-5.53157	-9999	48.7596
2006	244	54600	55200	54900	54.6	4.89	-72.89	-71.32	-66.64	6.25	-5.55373	-9999	48.7317
2006	244	55200	55800	55500	50	4.92	-72.64	-70.65	-66.25	6.39	-5.99196	-9999	48.8598
2006	244	55800	56400	56100	50.2	4.87	-72.45	-70.08	-66.25	6.2	-7.81281	-9999	49.4835
2006	244	56400	57000	56700	48.1	5.14	-72.79	-70.05	-66.07	6.72	-3.71972	-9999	49.527
2006	244	57000	57600	57300	45.3	5.12	-71.9	-69.71	-66.37	5.53	-7.30335	-9999	49.9029
2006	244	57600	58200	57900	45.2	5.12	-71.5	-69.16	-66	5.5	-9999	-9999	-9999
2006	244	58200	58800	58500	45.8	4.63	-71.95	-69.36	-66.35	5.6	-9999	-9999	-9999
2006	244	58800	59400	59100	46.8	4.51	-72.97	-69.42	-66.29	6.68	-3.76382	-9999	62.21
2006	244	59400	60000	59700	45.5	4.21	-73.36	-69.27	-66.17	7.19	-1.69315	-9999	60.3367
2006	244	60000	60600	60300	42.8	4.35	-74.58	-69.18	-66.07	8.51	-2.56974	-9999	55.9074
2006	244	60600	61200	60900	42.4	4.26	-74.51	-68.9	-66.21	8.3	-11.2238	-9999	57.5656
2006	244	61200	61800	61500	38.6	4.64	-74.27	-68.45	-66.11	8.16	-8.03767	-9999	51.4752
2006	244	61800	62400	62100	39.4	4.32	-73.42	-68.99	-66.21	7.21	-6.29144	-9999	50.8769
2006	244	62400	63000	62700	38.8	4.53	-72.33	-68.59	-66.29	6.04	-5.23908	-9999	51.0437
2006	244	63000	63600	63300	37.4	5.27	-70.56	-67.88	-66.15	4.41	-7.03629	-9999	51.1115
2006	244	63600	64200	63900	43.2	4.73	-70.17	-67.93	-66.23	3.94	-1.82081	-9999	51.2856
2006	244	64200	64800	64500	47.6	4.29	-72.56	-68.64	-66.28	6.28	-5.02335	-9999	53.0183
2006	244	64800	65400	65100	42.6	3.97	-74.37	-69.05	-66.05	8.32	-6.65711	-9999	53.8181
2006	244	65400	66000	65700	42.2	4.31	-74.45	-68.64	-65.75	8.7	-4.6018	-9999	51.0431
2006	244	66000	66600	66300	40.8	4.6	-74.7	-68.45	-65.47	9.23	-3.97665	-9999	50.4572
2006	244	66600	67200	66900	41.5	4.9	-73.56	-68	-65.2	8.36	-5.60595	-9999	51.6363
2006	244	67200	67800	67500	39.9	4.84	-73.75	-67.98	-65.19	8.56	-6.15428	-9999	51.2073
2006	244	67800	68400	68100	40.5	4.6	-73.48	-68.11	-65.48	8	-3.82138	-9999	52.8534
2006	244	68400	69000	68700	37.4444	4.58889	-74.21	-68.15	-65.48	8.73	-6.10826	-9999	51.5137
2006	244	69000	69600	69300	36.7143	4.35714	-74.3	-67.743	-65.6714	8.62857	-7.11037	-9999	51.7321
2006	244	69600	70200	69900	41.4	4.22	-72.8	-68.04	-65.64	7.16	-5.33512	-9999	54.5175
2006	244	70200	70800	70500	38.1	4.74	-73.59	-67.41	-65.17	8.42	-3.1028	-9999	54.2838
2006	244	70800	71400	71100	39.7	4.57	-74.94	-67.79	-65.16	9.78	-3.41225	-9999	53.4778
2006	244	71400	72000	71700	41.7	4.38	-75.02	-68.04	-65.1	9.92	-0.612122	-9999	54.4953
2006	244	72000	72600	72300	37.9	4.56	-75.29	-68.21	-64.89	10.4	-2.43503	-9999	53.9584
2006	244	72600	73200	72900	37.3	4.74	-75.04	-67.58	-65.02	10.02	-2.17151	-9999	53.7393
2006	244	73200	73800	73500	35	4.96	-74.77	-67.44	-65.29	9.48	-4.80552	-9999	50.9918
2006	244	73800	74400	74100	36.1	4.93	-73.74	-67.29	-65.42	8.32	-5.50536	-9999	50.8405
2006	244	74400	75000	74700	38	5.05	-74.02	-67.71	-65.27	8.75	-5.29567	-9999	50.6104
2006	244	75000	75600	75300	34	5.53	-73.51	-67.3	-64.77	8.74	-2.88723	-9999	52.4676
2006	244	75600	76200	75900	32.1	6.03	-69.68	-66.72	-64.63	5.05	-6.83814	-9999	51.7101
2006	244	76200	76800	76500	30.3	6.34	-68.11	-66.43	-64.6	3.51	-6.8354	-9999	52.5562
2006	244	76800	77400	77100	33.1	5.97	-67.8	-66.39	-64.71	3.09	-6.26915	-9999	52.2191
2006	244	77400	78000	77700	36.2	5.54	-67.99	-66.45	-64.83	3.16	-3.58745	-9999	53.3524
2006	244	78000	78600	78300	32.4	5.97	-68.09	-66.41	-64.73	3.36	-3.73866	-9999	50.8306
2006	244	78600	79200	78900	28.7	5.76	-67.69	-66.39	-65	2.69	-4.93938	-9999	52.7049
2006	244	79200	79800	79500	29	5.69	-67.31	-66.39	-65.2	2.11	-6.42722	-9999	52.3983
2006	244	79800	80400	80100	32.4	5.3	-67.4	-66.56	-65.39	2.01	-6.66341	-9999	52.1005
2006	244	80400	81000	80700	35.2	5.02	-67.54	-66.64	-65.55	1.99	-5.01032	-9999	51.4042
2006	244	81000	81600	81300	29.1	5.44	-67.49	-66.59	-65.34	2.15	-2.8346	-9999	51.0363
2006	244	81600	82200	81900	25.2	5.94	-67.16	-66.3	-64.93	2.23	-4.40457	-9999	49.0013
2006	244	82200	82800	82500	25	5.57	-66.97	-66.24	-64.93	2.04	-7.55149	-9999	51.5252
2006	244	82800	83400	83100	31.6	5.05	-66.95	-66.32	-65.22	1.73	-3.50363	-9999	52.5509
2006	244	83400	84000	83700	36.2	5.01	-66.96	-66.33	-65.4	1.56	-4.77009	-9999	48.8548
2006	244	84000	84600	84300	31.2	5.69	-66.85	-66.09	-65.17	1.68	-4.15435	-9999	51.1283
2006	244	84600	85200	84900	29.6	5.78	-66.82	-65.95	-64.83	1.99	-3.2076	-9999	50.7009
2006	244	85200	85800	85500	30.2	5.46	-66.84	-65.96	-64.87	1.97	-5.73545	-9999	47.7809
2006	244	85800.1	86400	86100	32.3334	4.71102	-67.0556	-66.156	-65.0778	1.97777	-5.26034	-9999	48.444
2006	245	0	600	300	38.9	4.21	-67.41	-66.34	-65.29	2.12	-9999	-9999	48.2823
2006	245	600	1200	900	32.3	4.86	-67.35	-66.09	-64.91	2.44	-9999	-9999	48.7387
2006	245	1200	1800	1500	38.7	4.15	-68.06	-66.35	-65.08	2.98	-0.453969	-9999	56.0434
2006	245	1800	2400	2100	34.3	4.15	-67.97	-66.25	-65.15	2.82	-1.088	-9999	52.0351
2006	245	2400	3000	2700	36.3	4.29	-67.03	-66.1	-65.19	1.84	-4.96958	-9999	47.9178
2006	245	3000	3600	3300	36.2	3.97	-67.01	-66.1	-65.17	1.84	-4.48066	-9999	50.319
2006	245	3600	4200	3900	32.5	4.17	-67	-66	-65.08	1.92	-2.92371	-9999	48.9777
2006	245	4200	4800	4500	33.6	4.79	-67.18	-65.95	-65	2.18	-1.99044	-9999	51.3455
2006	245	4800	5400	5100	35.1	4.23	-69.79	-66.31	-64.88	4.91	-4.27882	-9999	50.1511
2006	245	5400	6000	5700	35.6	4.4	-69.12	-66.47	-64.91	4.21	-4.62986	-9999	51.1186
2006	245	6000	6600	6300	31.2	5.19	-67.6	-65.96	-64.6	3	-6.01286	-9999	51.5282
2006	245	6600	7200	6900	29.9	5.27	-67.17	-65.81	-64.63	2.54	-3.68424	-9999	51.6143
2006	245	7200	7800	7500	30.7	5.14	-66.94	-65.82	-64.69	2.25	-1.13052	-9999	49.9276
2006	245	7800	8400	8100	31	4.7875	-66.6444	-65.822	-64.8111	1.83333	-2.62201	-9999	50.5604
2006	245	8400	9000	8700	33.9	4.74	-66.6	-65.71	-64.83	1.77	-2.71185	-9999	49.4179
2006	245	9000	9600	9300	35.2	4.66	-66.67	-65.76	-64.89	1.78	-4.78499	-9999	51.4649
2006	245	9600	10200	9900	31.8	4.8	-66.74	-65.8	-64.84	1.9	-2.48424	-9999	51.2788
2006	245	10200	10800	10500	23.2	5.14	-66.62	-65.88	-64.88	1.74	-1.18897	-9999	52.4331
2006	245	10800	11400	11100	25.4	4.78	-66.57	-65.99	-65.16	1.41	-9999	-9999	-9999
2006	245	11400	12000	11700	28.6	4.8	-66.67	-66.12	-65.33	1.34	-9999	-9999	-9999
2006	245	12000	12600	12300	27.2	4.92	-66.59	-66.05	-65.28	1.31	-2.81364	-9999	64.4418
2006	245	12600	13200	12900	24.5	5.2	-66.58	-66.04	-65.1	1.48	-2.76244	-9999	56.0339
2006	245	13200	13800	13500	22.3	5.43	-66.66	-66.07	-65.16	1.5	-4.18299	-9999	52.9504
2006	245	13800	14400	14100	18.4	5.89	-66.7	-66.14	-65.12	1.58	-9999	-9999	55.7036
2006	245	14400	15000	14700	16.4	5.74	-66.8	-66.19	-64.95	1.85	-3.1103	-9999	45.9893
2006	245	15000	15600	15300	19.8	5.31	-66.78	-66.22	-64.95	1.83	-2.32264	-9999	50.3867
2006	245	15600	16200	15900	36	3.6	-66.87	-66.43	-65.71	1.16	2.43148	-9999	54.8326
2006	245	16200	16800	16500	36.7	3.7	-66.92	-66.45	-65.82	1.1	-4.89861	-9999	54.3121
2006	245	16800	17400	17100	24.1	5.16	-66.68	-66.2	-65.26	1.42	-3.65052	-9999	52.6569
2006	245	17400	18000	17700	15.2	6.5	-66.26	-65.75	-64.43	1.83	-4.73891	-9999	51.5449
2006	245	18000	18600	18300	13.1	7.13	-66.15	-65.54	-63.99	2.16	-3.70786	-9999	49.5659
2006	245	18600	19200	18900	11	7.79	-66.1	-65.45	-63.86	2.24	-4.95778	-9999	48.8397
2006	245	19200	19800	19500	9.6	8.02	-66.04	-65.37	-63.64	2.4	-2.94764	-9999	49.5425
2006	245	19800	20400	20100	9.2	8.01	-66.08	-65.4	-63.73	2.35	-3.99342	-9999	47.9053
2006	245	20400	21000	20700	8.9	7.93	-66.19	-65.47	-63.78	2.41	-6.59064	-9999	51.2843
2006	245	21000	21600	21300	9.4	7.79	-66.28	-65.54	-63.71	2.57	-4.25659	-9999	52.5531
2006	245	21600	22200	21900	10.2	7.63	-66.41	-65.66	-63.95	2.46	-2.34612	-9999	50.6792
2006	245	22200	22800	22500	10.7	7.56	-66.5	-65.7	-63.66	2.84	-2.51128	-9999	49.8473
2006	245	22800	23400	23100	9.6	6.98	-66.57	-65.77	-63.32	3.25	-6.24516	-9999	49.9483
2006	245	23400	24000	23700	10.2	7.2	-66.6	-65.72	-63.36	3.24	-2.11172	-9999	50.1584
2006	245	24000	24600	24300	10.9	6.46	-66.7	-65.8	-63.29	3.41	-7.24934	-9999	54.1699
2006	245	24600	25200	24900	19.9	5.07	-66.84	-66.13	-64.2	2.64	-1.68593	-9999	53.3947
2006	245	25200	25800	25500	40.7	2.98	-66.93	-66.51	-65.5	1.43	-2.30668	-9999	54.0891
2006	245	25800	26400	26100	23.8	4.3	-66.44	-66.1	-64.93	1.51	-6.36784	-9999	52.5856
2006	245	26400	27000	26700	21.3	5.05	-66.34	-65.93	-64.74	1.6	-4.79063	-9999	50.2737
2006	245	27000	27600	27300	27.4	4.64	-66.4	-66.01	-65.16	1.24	-4.02924	-9999	49.0166
2006	245	27600	28200	27900	35.9	3.51	-66.4	-66.05	-65.41	0.99	-3.43163	-9999	50.2592
2006	245	28200	28800	28500	30.1	3.66	-66.19	-65.92	-65.08	1.11	-2.27187	-9999	52.8591
2006	245	28800	29400	29100	22.9	3.89	-66.08	-65.73	-64.87	1.21	-3.61157	-9999	52.5076
2006	245	29400	30000	29700	26.5	3.3	-66.1	-65.72	-65.19	0.91	-4.81577	-9999	55.8097
2006	245	30000	30600	30300	21	4.22	-66.13	-65.66	-65	1.13	-4.02564	-9999	51.9314
2006	245	30600	31200	30900	29.8	3.76	-66.16	-65.71	-65.04	1.12	-5.36629	-9999	51.6494
2006	245	31200	31800	31500	23.8	4.37	-66.05	-65.61	-64.88	1.17	-4.9294	-9999	51.6711
2006	245	31800	32400	32100	21.6	4.19	-66.23	-65.73	-64.98	1.25	-5.69289	-9999	51.1625
2006	245	32400	33000	32700	26.8	4.47	-66.28	-65.82	-65.11	1.17	-4.47674	-9999	48.7927
2006	245	33000	33600	33300	17.5	4.45	-66.31	-65.88	-65.02	1.29	-3.22119	-9999	52.4446
2006	245	33600	34200	33900	14.2	5.04	-66.5	-66.02	-64.51	1.99	-3.66538	-9999	49.5858
2006	245	34200	34800	34500	10.3	6.4	-66.5	-65.9	-63.81	2.69	-0.965677	-9999	50.974
2006	245	34800	35400	35100	7.7	6.37	-66.4	-65.8	-63.72	2.68	-2.51681	-9999	51.0062
2006	245	35400	36000	35700	7	6.04	-66.42	-65.8	-63.2	3.22	-2.12792	-9999	51.0313
2006	245	36000	36600	36300	12.6	5.02	-66.45	-65.97	-64.19	2.26	-4.42586	-9999	50.1671
2006	245	36600	37200	36900	9	6.82	-66.42	-65.79	-63.13	3.29	-2.74496	-9999	47.9789
2006	245	37200	37800	37500	6.3	7.35	-66.26	-65.47	-61.86	4.4	-4.00915	-9999	50.6651
2006	245	37800	38400	38100	5.4	7.18	-66.17	-65.59	-62.25	3.92	-4.42876	-9999	49.9793
2006	245	38400	39000	38700	6.3	7.25	-66.29	-65.72	-62.13	4.16	-5.11679	-9999	49.6455
2006	245	39000	39600	39300	6.9	6.96	-66.21	-65.68	-62.67	3.54	-4.74731	-9999	50.8266
2006	245	39600	40200	39900	8.3	6.8	-66.21	-65.67	-63.76	2.45	-6.63919	-9999	52.2198
2006	245	40200	40800	40500	8.6	5.7	-66.19	-65.77	-64.48	1.71	-2.26057	-9999	50.9368
2006	245	40800	41400	41100	8.5	5.62	-66.13	-65.72	-64.66	1.47	-2.23355	-9999	53.2309
2006	245	41400	42000	41700	15.6	4.84	-66.13	-65.77	-64.81	1.32	-2.85448	-9999	52.0435
2006	245	42000	42600	42300	20.2	4.7	-66.34	-65.94	-65.05	1.29	-4.57868	-9999	52.2189
2006	245	42600	43200	42900	17.8	4.96	-66.32	-65.85	-64.71	1.61	-4.53854	-9999	52.4301
2006	245	43200	43800	43500	13.2	5.15	-66.34	-65.83	-64.4	1.94	-4.06317	-9999	47.5852
2006	245	43800	44400	44100	9.8	6.13	-66.19	-65.55	-63.19	3	-5.63443	-9999	50.9831
2006	245	44400	45000	44700	12.8	6.27	-65.91	-65.32	-63.14	2.77	-4.62328	-9999	50.9814
2006	245	45000	45600	45300	9.1	6.73	-65.71	-65.24	-63.14	2.57	-5.61335	-9999	51.101
2006	245	45600	46200	45900	7.1	6.86	-65.7	-65.2	-62.57	3.13	-3.90926	-9999	51.4863
2006	245	46200	46800	46500	6	6.84	-65.7	-65.17	-62.9	2.8	-4.04493	-9999	50.5843
2006	245	46800	47400	47100	5.1	6.63	-65.64	-65.17	-62.32	3.32	-3.90583	-9999	51.8938
2006	245	47400	48000	47700	6	6.15	-65.61	-65.2	-62.8	2.81	-4.62261	-9999	49.9819
2006	245	48000	48600	48300	14.3	4.57	-65.7	-65.38	-64.24	1.46	-4.75888	-9999	50.555
2006	245	48600	49200	48900	32	2.85	-65.83	-65.63	-65.05	0.78	-4.65014	-9999	52.5747
2006	245	49200	49800	49500	17	3.82	-65.71	-65.47	-64.69	1.02	-4.13115	-9999	50.268
2006	245	49800	50400	50100	14.2	4.4	-65.94	-65.5	-64.39	1.55	-3.39414	-9999	49.0188
2006	245	50400	51000	50700	17.4	4.13	-66	-65.57	-64.21	1.79	-9999	-9999	-9999
2006	245	51000	51600	51300	28.3	2.9	-65.94	-65.66	-64.74	1.2	-9999	-9999	-9999
2006	245	51600	52200	51900	27.6	3.15	-65.84	-65.58	-64.75	1.09	9.3469	-9999	-9999
2006	245	52200	52800	52500	16.9	4.97	-65.58	-65.2	-64.01	1.57	-2.66243	-9999	-9999
2006	245	52800	53400	53100	8.5	6.46	-65.47	-64.86	-62.81	2.66	-4.35401	-9999	48.4788
2006	245	53400	54000	53700	6	7.01	-65.4	-64.77	-62.22	3.18	-2.35774	-9999	51.9274
2006	245	54000	54600	54300	4.5	7.09	-65.4	-64.69	-60.96	4.44	-9.1233	-9999	52.7656
2006	245	54600	55200	54900	3.8	6.99	-65.37	-64.65	-59.79	5.58	-2.83974	-9999	50.3522
2006	245	55200	55800	55500	5.8	7.03	-65.34	-64.61	-59.9	5.44	-4.57687	-9999	51.8356
2006	245	55800	56400	56100	4.6	7.14	-65.33	-64.61	-59.11	6.22	-3.8311	-9999	51.3215
2006	245	56400	57000	56700	2.9	7.02	-65.47	-64.8	-60.95	4.52	-3.80587	-9999	48.0469
2006	245	57000	57600	57300	4.8	6.61	-65.64	-64.96	-62.19	3.45	-3.56266	-9999	47.2172
2006	245	57600	58200	57900	4.5	6.14	-65.7	-65.1	-62.82	2.88	-5.58582	-9999	50.141
2006	245	58200	58800	58500	3.7	6.32	-65.7	-65.09	-61.86	3.84	-5.57577	-9999	51.8997
2006	245	58800	59400	59100	5.7	6.13	-65.69	-65.01	-61.94	3.75	-1.63363	-9999	50.1267
2006	245	59400	60000	59700	9.1	5.11	-65.61	-65.14	-62.92	2.69	-5.73392	-9999	52.1889
2006	245	60000	60600	60300	9.3	4.39	-65.61	-65.19	-63.64	1.97	-0.818214	-9999	56.3145
2006	245	60600	61200	60900	17.7	3.45	-65.68	-65.42	-64.49	1.19	-1.57929	-9999	56.1662
2006	245	61200	61800	61500	30.6	3.32	-65.69	-65.43	-64.61	1.08	1.75953	-9999	58.1853
2006	245	61800	62400	62100	32.3	3.81	-65.5	-65.25	-64.59	0.91	-3.84627	-9999	53.5317
2006	245	62400	63000	62700	34.9	3.1	-65.49	-65.2	-64.62	0.87	-0.623914	-9999	56.9311
2006	245	63000	63600	63300	28.3	4.19	-65.66	-65.14	-64.29	1.37	-4.46288	-9999	51.4562
2006	245	63600	64200	63900	34.2	3.68	-65.68	-65.14	-64.31	1.37	-2.43638	-9999	58.0574
2006	245	64200	64800	64500	38	3.74	-65.64	-65.11	-64.36	1.28	2.31561	-9999	56.8855
2006	245	64800	65400	65100	33.7	3.92	-65.59	-64.91	-64.18	1.41	-4.99429	-9999	53.1045
2006	245	65400	66000	65700	23.6	4.47	-65.46	-64.9	-64.07	1.39	-5.37378	-9999	51.4267
2006	245	66000	66600	66300	26.9	4.29	-65.4	-64.91	-64.09	1.31	-5.12635	-9999	53.677
2006	245	66600	67200	66900	21.9	4.51	-65.25	-64.79	-63.92	1.33	-5.74185	-9999	52.7325
2006	245	67200	67800	67500	17.8	4.39	-64.97	-64.68	-63.82	1.15	-3.66925	-9999	53.7728
2006	245	67800	68400	68100	10.3	5.47	-64.74	-64.45	-63.48	1.26	-2.86458	-9999	52.2536
2006	245	68400	69000	68700	14.9	4.92	-64.71	-64.47	-63.6	1.11	-4.03471	-9999	50.2155
2006	245	69000	69600	69300	20.7	4.44	-64.72	-64.5	-63.78	0.94	-4.58961	-9999	53.6356
2006	245	69600	70200	69900	20.8	4.21	-64.61	-64.47	-63.85	0.76	-7.35466	-9999	54.5682
2006	245	70200	70800	70500	21.5	4.22	-64.41	-64.3	-63.7	0.71	-2.69878	-9999	53.3758
2006	245	70800	71400	71100	17.3	4.53	-64.2	-64.07	-63.51	0.69	-1.76005	-9999	50.9737
2006	245	71400	72000	71700	18.3	4.3	-63.93	-63.87	-63.29	0.64	-5.1002	-9999	53.9347
2006	245	72000	72600	72300	25.9	3.56	-63.81	-63.83	-63.51	0.3	-4.26232	-9999	56.7485
2006	245	72600	73200	72900	21.1	4.3	-63.67	-63.69	-63.35	0.32	-5.3044	-9999	54.5835
2006	245	73200	73800	73500	11.9	5.14	-63.6	-63.57	-63.05	0.55	-5.00079	-9999	52.822
2006	245	73800	74400	74100	8	4.97	-63.53	-63.58	-63.16	0.37	-3.90566	-9999	52.3499
2006	245	74400	75000	74700	4.57143	5.6	-63.4857	-63.5	-62.8143	0.671429	-3.256	-9999	51.9324
2006	245	75000	75600	75300	1.1	5.48	-63.4	-63.44	-62.56	0.84	-4.785	-9999	53.2087
2006	245	75600	76200	75900	0.8	5.72	-63.4	-63.38	-62.09	1.31	-5.75632	-9999	52.9323
2006	245	76200	76800	76500	3	5.12	-63.36	-63.3	-62.1	1.26	-1.9252	-9999	56.488
2006	245	76800	77400	77100	24.5	2.94	-63.11	-63.16	-62.69	0.42	-3.65109	-9999	57.8185
2006	245	77400	78000	77700	22.8	3.37	-62.86	-62.89	-62.52	0.34	-4.02092	-9999	56.2481
2006	245	78000	78600	78300	19.9	3.7	-62.68	-62.63	-62.24	0.44	-3.72817	-9999	54.3024
2006	245	78600	79200	78900	30.9	3.67	-62.56	-62.52	-62.06	0.5	-3.93622	-9999	54.6203
2006	245	79200	79800	79500	20.3	4.17	-62.42	-62.36	-61.95	0.47	-3.62629	-9999	55.2977
2006	245	79800	80400	80100	22.5	4.24	-62.19	-62.21	-61.7	0.49	-4.28947	-9999	53.9333
2006	245	80400	81000	80700	23.2	4.45	-61.86	-61.94	-61.61	0.25	-5.67858	-9999	54.1394
2006	245	81000	81600	81300	16.2	4.49	-61.7	-61.78	-61.49	0.21	-4.75352	-9999	56.7935
2006	245	81600	82200	81900	12	4.86	-61.6	-61.68	-61.43	0.17	-3.47213	-9999	53.9559
2006	245	82200	82800	82500	9.2	4.93	-61.59	-61.66	-61.39	0.2	-4.03193	-9999	54.7651
2006	245	82800	83400	83100	6.4	5.46	-61.6	-61.65	-61.26	0.34	-4.32769	-9999	56.1744
2006	245	83400	84000	83700	6.1	6.25	-61.57	-61.61	-60.86	0.71	-3.66089	-9999	54.033
2006	245	84000	84600	84300	2.8	6.42	-61.42	-61.52	-60.67	0.75	-2.16493	-9999	55.0696
2006	245	84600	85200	84900	2.8	6.68	-61.35	-61.39	-60.29	1.06	-6.0611	-9999	55.1482
2006	245	85200	85800	85500	1.5	7.08	-61.21	-61.26	-59.97	1.24	-1.78111	-9999	54.7981
2006	245	85800.1	86400	86100	0.599933	6.73999	-61.19	-61.2	-59.81	1.38	-1.55423	-9999	-9999
2006	246	0	600	300	359.7	6.52	-61.05	-61.08	-59.9	1.15	-6.01626	-9999	56.382
2006	246	600	1200	900	359.4	6.33	-60.89	-60.97	-59.89	1	-9999	-9999	53.9712
2006	246	1200	1800	1500	358.4	6.14	-60.74	-60.8	-60.04	0.7	-4.70173	-9999	52.9696
2006	246	1800	2400	2100	0	6.22	-60.53	-60.61	-59.95	0.58	-2.04953	-9999	52.9746
2006	246	2400	3000	2700	2.9	6.13	-60.33	-60.42	-60	0.33	-3.38985	-9999	51.2643
2006	246	3000	3600	3300	3.9	5.83	-60.19	-60.27	-59.98	0.21	-2.25467	-9999	53.484
2006	246	3600	4200	3900	3.2	5.54	-60.16	-60.25	-60	0.16	-9999	-9999	-9999
2006	246	4200	4800	4500	3.4	5.26	-60.28	-60.43	-60.2	0.08	-9999	-9999	-9999
2006	246	4800	5400	5100	1	4.23	-60.23	-60.34	-60.15	0.08	2.39467	-9999	-9999
2006	246	5400	6000	5700	9.1	3.15	-60.01	-60.16	-59.97	0.04	0.570392	-9999	-9999
2006	246	6000	6600	6300	5.8	3.58	-59.95	-60.04	-59.87	0.08	-0.195425	-9999	-9999
2006	246	6600	7200	6900	3.3	4.24	-59.78	-59.83	-59.39	0.39	-0.0909089	-9999	-9999
2006	246	7200	7800	7500	1.2	4.87	-59.77	-59.79	-59.27	0.5	-1.73032	-9999	54.2566
2006	246	7800	8400	8100	358.667	5.26667	-59.7857	-59.814	-59.2571	0.528571	-2.86728	-9999	55.7051
2006	246	8400	9000	8700	359.9	5.35	-59.7	-59.79	-59.21	0.49	-1.03078	-9999	55.2209
2006	246	9000	9600	9300	358.8	6.62	-59.62	-59.66	-58.99	0.63	-2.64264	-9999	54.6775
2006	246	9600	10200	9900	358.7	6.53	-59.56	-59.58	-59.01	0.55	-2.67867	-9999	55.3775
2006	246	10200	10800	10500	357.5	6.49	-59.49	-59.51	-58.94	0.55	-5.1045	-9999	54.032
2006	246	10800	11400	11100	358	6.06	-59.46	-59.51	-59	0.46	-2.50167	-9999	53.5543
2006	246	11400	12000	11700	358.1	5.82	-59.42	-59.48	-58.97	0.45	-0.982216	-9999	55.2912
2006	246	12000	12600	12300	358.1	5.81	-59.24	-59.32	-58.8	0.44	-2.10582	-9999	52.3768
2006	246	12600	13200	12900	356.7	6.23	-59.14	-59.22	-58.85	0.29	-2.58297	-9999	55.0581
2006	246	13200	13800	13500	356.3	6.82	-58.97	-59.04	-58.58	0.39	-2.73195	-9999	52.3097
2006	246	13800	14400	14100	355.8	6.69	-58.93	-59	-58.6	0.33	-2.68289	-9999	53.3471
2006	246	14400	15000	14700	354.2	6.2	-58.79	-58.86	-58.25	0.54	-3.33407	-9999	52.5023
2006	246	15000	15600	15300	355.3	6.11	-58.84	-58.82	-58.16	0.68	-0.685133	-9999	52.9077
2006	246	15600	16200	15900	358.4	5.79	-58.81	-58.85	-58.31	0.5	-2.56708	-9999	54.8998
2006	246	16200	16800	16500	1.3901e-17	5.75	-58.64	-58.66	-58.1	0.54	-2.81677	-9999	53.2912
2006	246	16800	17400	17100	0.1	5.91	-58.51	-58.52	-57.78	0.73	-2.92286	-9999	53.1708
2006	246	17400	18000	17700	358.5	6.02	-58.31	-58.24	-57.24	1.07	-1.4671	-9999	54.9096
2006	246	18000	18600	18300	2.9	5.66	-58.3	-58.26	-57.71	0.59	-3.46492	-9999	55.4185
2006	246	18600	19200	18900	1.2	5.78	-58.25	-58.23	-57.53	0.72	-2.5663	-9999	54.7995
2006	246	19200	19800	19500	0.8	5.87	-58.17	-58.11	-57.41	0.76	-1.71638	-9999	55.2475
2006	246	19800	20400	20100	2.2	5.95	-58.07	-58.07	-57.2	0.87	-1.23275	-9999	55.115
2006	246	20400	21000	20700	3.7	5.79	-58.09	-58.12	-57.62	0.47	-1.58255	-9999	55.0355
2006	246	21000	21600	21300	4.3	5.55	-58.07	-58.1	-57.89	0.18	-1.43781	-9999	55.6781
2006	246	21600	22200	21900	15.6	4.58	-57.97	-58.02	-57.83	0.14	-5.03996	-9999	55.7289
2006	246	22200	22800	22500	27.4	3.44	-57.91	-57.98	-57.84	0.07	-1.02906	-9999	54.0345
2006	246	22800	23400	23100	18.7	5.07	-58.07	-58.04	-57.82	0.25	-2.23972	-9999	53.4218
2006	246	23400	24000	23700	11.9	5.57	-58.17	-58.12	-57.72	0.45	-0.53084	-9999	55.0546
2006	246	24000	24600	24300	5.7	5.46	-58.15	-58.14	-57.72	0.43	-4.46179	-9999	56.3463
2006	246	24600	25200	24900	3.1	5.38	-58.2	-58.19	-57.68	0.52	-3.1444	-9999	53.0076
2006	246	25200	25800	25500	359.2	5.72	-58.17	-58.1	-57.63	0.54	-4.18031	-9999	55.8761
2006	246	25800	26400	26100	3	6.48	-58.08	-57.89	-56.84	1.24	-1.93893	-9999	55.8666
2006	246	26400	27000	26700	359.3	7.15	-58.07	-57.87	-56.46	1.61	-4.80218	-9999	54.8362
2006	246	27000	27600	27300	356.6	6.89	-58.12	-58.08	-57.41	0.71	-0.744459	-9999	54.1514
2006	246	27600	28200	27900	357.4	7.25	-58.2	-58.18	-57.62	0.58	-2.98816	-9999	55.2785
2006	246	28200	28800	28500	356.1	6.95	-58.27	-58.27	-57.88	0.39	-3.11939	-9999	54.6027
2006	246	28800	29400	29100	0.5	7.18	-58.21	-58.16	-57.68	0.53	-3.59452	-9999	54.1594
2006	246	29400	30000	29700	360	6.72	-58.06	-58.01	-57.66	0.4	-2.09094	-9999	54.5731
2006	246	30000	30600	30300	3.3	6.75	-58.05	-58.06	-57.77	0.28	-1.25007	-9999	56.1127
2006	246	30600	31200	30900	3.7	6.92	-58.08	-58.1	-57.79	0.29	-1.74172	-9999	55.7252
2006	246	31200	31800	31500	3.6	6.64	-58.01	-58.01	-57.72	0.29	-2.00818	-9999	55.9088
2006	246	31800	32400	32100	3.9	6.73	-57.97	-57.97	-57.64	0.33	-4.86048	-9999	55.0741
2006	246	32400	33000	32700	3.1	6.64	-57.92	-57.9	-57.49	0.43	-3.87824	-9999	56.9769
2006	246	33000	33600	33300	1.6	6.3	-57.92	-57.9	-57.54	0.38	-2.03928	-9999	57.4609
2006	246	33600	34200	33900	359.4	6.12	-57.96	-57.94	-57.6	0.36	-2.89584	-9999	56.532
2006	246	34200	34800	34500	355.9	6.38	-58.03	-57.97	-57.68	0.35	-2.46285	-9999	55.8849
2006	246	34800	35400	35100	355	6.32	-58.05	-57.99	-57.68	0.37	-6.51924	-9999	53.6786
2006	246	35400	36000	35700	356.2	6.34	-58.1	-58	-57.65	0.45	-1.69254	-9999	52.8892
2006	246	36000	36600	36300	356	6.39	-58.18	-58.09	-57.61	0.57	-3.47698	-9999	52.8214
2006	246	36600	37200	36900	354.8	6.3	-58.18	-58.11	-57.49	0.69	-3.37722	-9999	53.3529
2006	246	37200	37800	37500	356.7	6.44	-58.22	-58.12	-57.37	0.85	-2.46659	-9999	52.1404
2006	246	37800	38400	38100	358.5	6.42	-58.24	-58.12	-56.7	1.54	-2.79112	-9999	51.6058
2006	246	38400	39000	38700	354.9	6.23	-58.21	-58.04	-56.46	1.75	-5.0628	-9999	53.6329
2006	246	39000	39600	39300	356.1	6.72	-58.28	-58.18	-57.26	1.02	-1.01981	-9999	50.9957
2006	246	39600	40200	39900	357.9	6.37	-58.27	-58.17	-57.3	0.97	-3.37804	-9999	53.8324
2006	246	40200	40800	40500	354.3	6.08	-58.04	-57.86	-56.66	1.38	-3.2673	-9999	54.1015
2006	246	40800	41400	41100	353.4	5.98	-57.94	-57.68	-56.4	1.54	-1.16423	-9999	55.2332
2006	246	41400	42000	41700	352.7	6.14	-57.83	-57.52	-55.95	1.88	-0.585446	-9999	56.1791
2006	246	42000	42600	42300	352.8	6.06	-57.82	-57.47	-55.38	2.44	-3.25835	-9999	53.9067
2006	246	42600	43200	42900	352.6	5.92	-57.66	-57.13	-55.59	2.07	-2.37923	-9999	53.1508
2006	246	43200	43800	43500	354.9	5.97	-57.64	-57.31	-55.95	1.69	-9999	-9999	-9999
2006	246	43800	44400	44100	356.2	6.26	-57.7	-57.51	-56.32	1.38	-9999	-9999	-9999
2006	246	44400	45000	44700	0.9	6.32	-57.71	-57.6	-56.41	1.3	-1.81216	-9999	66.7093
2006	246	45000	45600	45300	1	5.94	-57.8	-57.7	-56.51	1.29	-3.07612	-9999	60.8901
2006	246	45600	46200	45900	357.7	5.75	-57.89	-57.79	-56.34	1.55	-3.56667	-9999	57.0242
2006	246	46200	46800	46500	359.3	5.37	-57.96	-57.78	-56.01	1.95	2.89865	-9999	57.4713
2006	246	46800	47400	47100	0.4	4.62	-58.01	-57.82	-55.93	2.08	-3.08304	-9999	64.7259
2006	246	47400	48000	47700	10.9	2.84	-58.13	-58	-57.1	1.03	-0.0806531	-9999	64.0504
2006	246	48000	48600	48300	7.9	3.19	-58.15	-58.03	-57.59	0.56	3.29311	-9999	63.404
2006	246	48600	49200	48900	6.7	3.54	-58.19	-57.95	-57.25	0.94	2.04762	-9999	62.0851
2006	246	49200	49800	49500	8.9	3.87	-58.34	-57.96	-57.04	1.3	4.81801	-9999	63.3708
2006	246	49800	50400	50100	3.1	4.57	-58.37	-58	-56.82	1.55	-0.422604	-9999	65.2933
2006	246	50400	51000	50700	356.8	4.99	-58.38	-58.01	-56.35	2.03	6.21162	-9999	60.3057
2006	246	51000	51600	51300	358	5.04	-58.48	-58.12	-56.16	2.32	1.51374	-9999	56.5437
2006	246	51600	52200	51900	358.8	5.63	-58.59	-58.05	-55.51	3.08	-1.73527	-9999	53.0826
2006	246	52200	52800	52500	0.3	5.93	-58.66	-57.97	-55.35	3.31	-3.59447	-9999	52.8519
2006	246	52800	53400	53100	359.667	5.63333	-58.7167	-57.583	-54.85	3.86667	-4.72682	-9999	52.5863
2006	246	53400	54000	53700	358	5.47	-58.91	-58	-55.77	3.14	-0.127288	-9999	54.241
2006	246	54000	54600	54300	356.2	4.86	-59.18	-58.18	-56.09	3.09	6.65397	-9999	58.1164
2006	246	54600	55200	54900	355.9	5.93	-59.43	-57.99	-55.52	3.91	1.21136	-9999	52.7468
2006	246	55200	55800	55500	356	5.95	-59.43	-57.83	-54.73	4.7	-0.946412	-9999	53.6444
2006	246	55800	56400	56100	354.5	5.42	-59.59	-58.36	-55.43	4.16	-0.372617	-9999	55.0349
2006	246	56400	57000	56700	356.1	5.43	-59.67	-58.49	-55.4	4.27	1.62059	-9999	54.2024
2006	246	57000	57600	57300	359.4	5.47	-59.81	-58.31	-55.21	4.6	6.51184	-9999	57.0945
2006	246	57600	58200	57900	358.4	5.01	-60.23	-58.55	-55.75	4.48	6.51221	-9999	61.1947
2006	246	58200	58800	58500	357.2	5.25	-60.35	-58.37	-55.83	4.52	5.75003	-9999	62.1882
2006	246	58800	59400	59100	356.5	5.34	-60.52	-58.27	-55.4	5.12	6.69132	-9999	62.2788
2006	246	59400	60000	59700	357.7	4.61	-60.64	-58.54	-55.54	5.1	6.10622	-9999	67.6698
2006	246	60000	60600	60300	3.4	3.91	-60.9	-58.92	-56.52	4.38	11.8169	-9999	73.176
2006	246	60600	61200	60900	3.9	3.74	-61.12	-59.18	-57.27	3.85	15.5071	-9999	72.9133
2006	246	61200	61800	61500	3.1	3.67	-61.46	-59.23	-57.47	3.99	12.816	-9999	71.5481
2006	246	61800	62400	62100	358.8	3.58	-61.79	-59.43	-57.65	4.14	9.58498	-9999	70.9209
2006	246	62400	63000	62700	358	3.99	-61.62	-59.19	-57.08	4.54	8.5577	-9999	68.3641
2006	246	63000	63600	63300	359.8	4.38	-61.99	-58.78	-56.04	5.95	8.74982	-9999	66.1865
2006	246	63600	64200	63900	1.6	3.38	-62.02	-59.31	-57.06	4.96	10.332	-9999	66.4328
2006	246	64200	64800	64500	5.4	3.1	-61.44	-59.83	-57.14	4.3	9.40155	-9999	74.076
2006	246	64800	65400	65100	19.9	2.33	-62.38	-60.63	-58.5	3.88	8.87003	-9999	72.3641
2006	246	65400	66000	65700	31.8	2.29	-63.81	-60.72	-58.84	4.97	6.63301	-9999	67.253
2006	246	66000	66600	66300	27.4	2.78	-64.47	-60.54	-58.63	5.84	11.5229	-9999	75.6039
2006	246	66600	67200	66900	14	3.23	-64.18	-60.4	-58.1	6.08	8.63821	-9999	72.8425
2006	246	67200	67800	67500	9.4	3.63	-64.16	-59.99	-57.92	6.24	6.63696	-9999	66.9369
2006	246	67800	68400	68100	358.5	3.56	-63.77	-59.6	-57.88	5.89	4.79064	-9999	65.3425
2006	246	68400	69000	68700	356	3.63	-63.95	-59.67	-57.51	6.44	4.5479	-9999	63.0195
2006	246	69000	69600	69300	358.5	3.92	-63.77	-59.47	-56.59	7.18	2.30387	-9999	60.3275
2006	246	69600	70200	69900	0.7	3.97	-63.52	-58.78	-55.66	7.86	2.2041	-9999	63.6845
2006	246	70200	70800	70500	17.7	2.97	-64.14	-59.53	-56.46	7.68	2.81191	-9999	67.849
2006	246	70800	71400	71100	32.4	2.41	-66.94	-60.82	-57.52	9.42	2.17821	-9999	63.0862
2006	246	71400	72000	71700	5.7	3.16	-66.74	-59.37	-56.47	10.27	4.69552	-9999	71.4098
2006	246	72000	72600	72300	359.8	3.09	-64.93	-58.96	-55.94	8.99	10.6637	-9999	68.7552
2006	246	72600	73200	72900	3.6	2.82	-65.04	-59.43	-56.4	8.64	7.75763	-9999	68.3903
2006	246	73200	73800	73500	7	2.62	-65.39	-59.87	-57.27	8.12	9.35385	-9999	70.5297
2006	246	73800	74400	74100	7.9	2.77	-67.29	-59.75	-56.95	10.34	10.4193	-9999	72.8739
2006	246	74400	75000	74700	6.9	2.66	-67.33	-59.42	-56.36	10.97	8.66873	-9999	74.9686
2006	246	75000	75600	75300	11.6	2.15	-67.88	-60.18	-56.75	11.13	1.12683	-9999	56.1063
2006	246	75600	76200	75900	13.2	2.01	-67.99	-60.56	-56.76	11.23	1.23808	-9999	53.7981
2006	246	76200	76800	76500	4.4	2.09	-67.89	-59.92	-56.61	11.28	-9999	-9999	-9999
2006	246	76800	77400	77100	358.9	1.72	-67.52	-59.76	-56.69	10.83	-9999	-9999	-9999
2006	246	77400	78000	77700	359	1.72	-67.61	-59.8	-56.7	10.91	-9999	-9999	-9999
2006	246	78000	78600	78300	359.5	2	-67.13	-59.76	-56.85	10.28	-9999	-9999	-9999
2006	246	78600	79200	78900	359	0.94	-66.8	-60.62	-57.87	8.93	-9999	-9999	-9999
2006	246	79200	79800	79500	359	0.85	-69.06	-61.16	-57.98	11.08	-9999	-9999	-9999
2006	246	79800	80400	80100	359	0.92	-68.95	-60.56	-57.85	11.1	-9999	-9999	-9999
2006	246	80400	81000	80700	358.9	0.5	-68.37	-60.48	-57.91	10.46	-9999	-9999	-9999
2006	246	81000	81600	81300	359.6	0.12	-68.39	-60.93	-58.11	10.28	-9999	-9999	-9999
2006	246	81600	82200	81900	359.1	0.33	-69.19	-62.39	-58.68	10.51	-9999	-9999	-9999
2006	246	82200	82800	82500	34.4	1.25	-69.8	-62.9	-58.57	11.23	-9999	-9999	-9999
2006	246	82800	83400	83100	72	2.55	-69.92	-63.05	-58.41	11.51	-9999	-9999	-9999
2006	246	83400	84000	83700	72	2.15	-68.85	-62.75	-58.6	10.25	-9999	-9999	-9999
2006	246	84000	84600	84300	72	2.06	-68.92	-62.27	-58.49	10.43	-9999	-9999	-9999
2006	246	84600	85200	84900	72	1.75	-68.53	-62	-58.31	10.22	-9999	-9999	-9999
2006	246	85200	85800	85500	72	1.59	-67.93	-61.86	-58.57	9.36	-9999	-9999	-9999
2006	246	85800.1	86400	86100	72	1.62997	-67.82	-61.74	-59.3701	8.44992	-9999	-9999	-9999
2006	247	0	600	300	72	1.86667	-67.8333	-61.767	-59.95	7.88333	-9999	-9999	-9999
2006	247	600	1200	900	72	1.23	-68.07	-61.54	-59.32	8.75	-9999	-9999	-9999
2006	247	1200	1800	1500	72.3	1.13	-68.88	-61.53	-59.65	9.23	-9999	-9999	-9999
2006	247	1800	2400	2100	95	2.28	-69.25	-61.56	-59.93	9.32	-9999	-9999	-9999
2006	247	2400	3000	2700	95	2.54444	-69.49	-62.68	-59.66	9.83	-9999	-9999	-9999
2006	247	3000	3600	3300	95	2.86	-69.82	-62.93	-59.6	10.22	-9999	-9999	-9999
2006	247	3600	4200	3900	95	2.9	-70.84	-63.31	-59.59	11.25	-9999	-9999	-9999
2006	247	4200	4800	4500	106.4	3.01	-71.03	-63.92	-59.86	11.17	-9999	-9999	-9999
2006	247	4800	5400	5100	109	2.84	-70.91	-63.23	-60.12	10.79	-9999	-9999	-9999
2006	247	5400	6000	5700	109	2.84286	-70.7571	-63	-60.0714	10.6857	-9999	-9999	-9999
2006	247	6000	6600	6300	108.5	2.63	-71.21	-62.48	-60	11.21	-9999	-9999	-9999
2006	247	6600	7200	6900	108.4	2.58	-70.45	-62.31	-59.61	10.84	-9999	-9999	-9999
2006	247	7200	7800	7500	108.7	2.84	-71.11	-62.44	-59.53	11.58	-9999	-9999	-9999
2006	247	7800	8400	8100	108.667	3.15556	-71.11	-61.96	-59.01	12.1	-9999	-9999	-9999
2006	247	8400	9000	8700	108.6	3.14	-71.46	-62.45	-58.6	12.86	-9999	-9999	-9999
2006	247	9000	9600	9300	109	2.7	-71.56	-63.79	-58.65	12.91	-9999	-9999	-9999
2006	247	9600	10200	9900	108.75	2.5375	-71.2875	-64.238	-58.875	12.4125	-9999	-9999	-9999
2006	247	10200	10800	10500	109	2.98889	-70.8111	-64.211	-58.6667	12.1444	-9999	-9999	-9999
2006	247	10800	11400	11100	109	3.18	-70.09	-64.07	-58.76	11.33	-9999	-9999	-9999
2006	247	11400	12000	11700	109	3	-70.48	-65.56	-59.31	11.17	-9999	-9999	-9999
2006	247	12000	12600	12300	109	2.98	-71.37	-65.82	-59.35	12.02	-9999	-9999	-9999
2006	247	12600	13200	12900	109	3.34	-71.44	-65.7	-59.56	11.88	-9999	-9999	-9999
2006	247	13200	13800	13500	109	3.43	-71.65	-66.35	-58.71	12.94	-9999	-9999	-9999
2006	247	13800	14400	14100	108.7	3.27	-71.7	-66.98	-57.62	14.08	-9999	-9999	-9999
2006	247	14400	15000	14700	109	3.24	-71.08	-67.54	-56.95	14.13	-9999	-9999	-9999
2006	247	15000	15600	15300	109.8	2.45	-70.71	-68.41	-58.33	12.38	-9999	-9999	-9999
2006	247	15600	16200	15900	117.9	2.15	-71.17	-68.91	-60.54	10.63	-9999	-9999	-9999
2006	247	16200	16800	16500	118	1.73	-71.57	-68.88	-59.67	11.9	-9999	-9999	-9999
2006	247	16800	17400	17100	118	1.75	-71.13	-68.9	-61.05	10.08	-9999	-9999	-9999
2006	247	17400	18000	17700	118	1.84	-70.89	-69.36	-64.13	6.76	-9999	-9999	-9999
2006	247	18000	18600	18300	118	1.98	-71.51	-69.14	-63.35	8.16	-9999	-9999	-9999
2006	247	18600	19200	18900	118	2.63	-71.36	-69.31	-63.58	7.78	-9999	-9999	-9999
2006	247	19200	19800	19500	119.1	2.85	-71.27	-69.64	-63.45	7.82	-9999	-9999	-9999
2006	247	19800	20400	20100	122.3	3.08	-71.14	-69.53	-61.32	9.82	-9999	-9999	-9999
2006	247	20400	21000	20700	132.1	4.12	-71.58	-70.21	-62.07	9.51	-9999	-9999	-9999
2006	247	21000	21600	21300	133	4.14	-72.04	-70.23	-61.43	10.61	-9999	-9999	-9999
2006	247	21600	22200	21900	128.7	4.09	-71.94	-70.08	-60.63	11.31	-9999	-9999	-9999
2006	247	22200	22800	22500	124.5	3.78	-71.75	-69.84	-60.43	11.32	-9999	-9999	-9999
2006	247	22800	23400	23100	118.6	3.58	-71.59	-69.04	-59.96	11.63	-9999	-9999	-9999
2006	247	23400	24000	23700	118	3.37	-71.44	-68.88	-60.32	11.12	-9999	-9999	-9999
2006	247	24000	24600	24300	118	3.32	-71.05	-68.74	-61.6	9.45	-9999	-9999	-9999
2006	247	24600	25200	24900	118	3.03	-70.72	-68.71	-64.36	6.36	-9999	-9999	-9999
2006	247	25200	25800	25500	112.8	3.07	-70.1	-68.45	-63.61	6.49	-9999	-9999	-9999
2006	247	25800	26400	26100	104.9	3.51	-70.43	-68.01	-62.14	8.29	-9999	-9999	-9999
2006	247	26400	27000	26700	103.1	3.94	-70.51	-68.22	-61.71	8.8	-9999	-9999	-9999
2006	247	27000	27600	27300	98.4	3.64	-70.46	-68.37	-61.58	8.88	-9999	-9999	-9999
2006	247	27600	28200	27900	98	2.33	-70.64	-68.58	-63.6	7.04	-9999	-9999	-9999
2006	247	28200	28800	28500	78.4	0.45	-70.96	-69.13	-66.54	4.42	-9999	-9999	-9999
2006	247	28800	29400	29100	29.4	0.07	-70.57	-69	-67.14	3.43	-9999	-9999	-9999
2006	247	29400	30000	29700	71.6	0.5	-70.65	-68.91	-66.69	3.96	-9999	-9999	-9999
2006	247	30000	30600	30300	125.5	1.85	-69.47	-67.58	-63.97	5.5	-9999	-9999	-9999
2006	247	30600	31200	30900	117.7	2.68	-69.38	-66.64	-59.55	9.83	-9999	-9999	-9999
2006	247	31200	31800	31500	116	2.94	-69.79	-66.74	-60.35	9.44	-9999	-9999	-9999
2006	247	31800	32400	32100	116	3.11	-69.49	-66.87	-61.61	7.88	-9999	-9999	-9999
2006	247	32400	33000	32700	113.9	3.23	-70.55	-67.05	-62.41	8.14	-9999	-9999	-9999
2006	247	33000	33600	33300	105.3	3.57	-70.76	-66.91	-61.62	9.14	-9999	-9999	-9999
2006	247	33600	34200	33900	102.4	2.65	-69.68	-66.84	-63.93	5.75	-9999	-9999	-9999
2006	247	34200	34800	34500	114.6	2.45	-69.24	-66.66	-62.97	6.27	-9999	-9999	-9999
2006	247	34800	35400	35100	114.3	3.24	-69.09	-66.28	-62.42	6.67	-9999	-9999	-9999
2006	247	35400	36000	35700	115.5	3.78	-68.78	-65.68	-61.02	7.76	-9999	-9999	-9999
2006	247	36000	36600	36300	112.1	4.15	-69.44	-65.68	-60.86	8.58	-9999	-9999	-9999
2006	247	36600	37200	36900	101.2	4.17	-69.68	-65.31	-58.59	11.09	-9999	-9999	-9999
2006	247	37200	37800	37500	97.1	4.18	-69.63	-65.2	-58.22	11.41	-9999	-9999	-9999
2006	247	37800	38400	38100	106.5	3.36	-68.85	-65.79	-60.14	8.71	-9999	-9999	-9999
2006	247	38400	39000	38700	103.2	3.67	-69.6	-65.44	-59.39	10.21	-9999	-9999	-9999
2006	247	39000	39600	39300	103.5	2.65	-69.29	-65.94	-61.01	8.28	-9999	-9999	-9999
2006	247	39600	40200	39900	105.2	3.05	-69.55	-66.01	-60.2	9.35	-9999	-9999	-9999
2006	247	40200	40800	40500	105.4	3.89	-69.84	-65.74	-59.21	10.63	-9999	-9999	-9999
2006	247	40800	41400	41100	102.1	3.47	-69.87	-66.26	-59.02	10.85	-9999	-9999	-9999
2006	247	41400	42000	41700	93.6	2.7	-69.78	-66.7	-60.11	9.67	-9999	-9999	-9999
2006	247	42000	42600	42300	94.7	1.79	-69.46	-66.85	-61.35	8.11	-9999	-9999	-9999
2006	247	42600	43200	42900	98.8	3.45	-68.9	-65.83	-58.07	10.83	-9999	-9999	-9999
2006	247	43200	43800	43500	101.1	4.07	-69.45	-65.5	-57.46	11.99	-9999	-9999	-9999
2006	247	43800	44400	44100	96.8	4.19	-69.51	-65.62	-57.51	12	-9999	-9999	-9999
2006	247	44400	45000	44700	100.2	4.57	-69.44	-65.54	-56.96	12.48	-9999	-9999	-9999
2006	247	45000	45600	45300	108.3	3.95	-69.57	-65.96	-58.26	11.31	-9999	-9999	-9999
2006	247	45600	46200	45900	105.4	3.61	-69.74	-65.88	-57.74	12	-9999	-9999	-9999
2006	247	46200	46800	46500	101.8	3.61	-69.67	-65.87	-57.75	11.92	-9999	-9999	-9999
2006	247	46800	47400	47100	101.2	2.75	-69.75	-66.21	-59.1	10.65	-9999	-9999	-9999
2006	247	47400	48000	47700	96.9	2.47	-70.07	-66.4	-60.92	9.15	-9999	-9999	-9999
2006	247	48000	48600	48300	88.9	1.7	-69.32	-66.74	-63.11	6.21	-9999	-9999	-9999
2006	247	48600	49200	48900	73.9	2.51	-68.68	-66.45	-62.4	6.28	-9999	-9999	-9999
2006	247	49200	49800	49500	71.5	3.69	-67.87	-65.39	-60.02	7.85	-9999	-9999	-9999
2006	247	49800	50400	50100	67.9	3.53	-67.54	-64.74	-60.64	6.9	-9999	-9999	-9999
2006	247	50400	51000	50700	71.5	3.65	-67.36	-64.14	-55.9	11.46	-9999	-9999	-9999
2006	247	51000	51600	51300	79	2.67	-67.29	-64.04	-55.78	11.51	-9999	-9999	-9999
2006	247	51600	52200	51900	96.2	2.08	-67.85	-64.66	-59.69	8.16	-9999	-9999	-9999
2006	247	52200	52800	52500	92.1	2.73	-68.52	-64.68	-58.02	10.5	-9999	-9999	-9999
2006	247	52800	53400	53100	97.3	3.1	-68.72	-64.69	-57.46	11.26	-9999	-9999	-9999
2006	247	53400	54000	53700	98.5	3.74	-68.48	-64.89	-57.17	11.31	-9999	-9999	-9999
2006	247	54000	54600	54300	96.3	3.8	-68.49	-64.77	-57.72	10.77	-9999	-9999	-9999
2006	247	54600	55200	54900	90.9	3.46	-68.61	-64.57	-56.49	12.12	-9999	-9999	-9999
2006	247	55200	55800	55500	89.8	3.63	-68.51	-64.71	-56.38	12.13	-9999	-9999	-9999
2006	247	55800	56400	56100	90.1	3.39	-68.27	-64.57	-57.54	10.73	-9999	-9999	-9999
2006	247	56400	57000	56700	86.3	2.9	-68.04	-64.41	-58.35	9.69	-9999	-9999	-9999
2006	247	57000	57600	57300	87.1	3.04	-67.61	-63.57	-58	9.61	-9999	-9999	-9999
2006	247	57600	58200	57900	83.8	3.04	-67.48	-63.14	-57.37	10.11	-9999	-9999	-9999
2006	247	58200	58800	58500	81.5	3.55	-67.98	-62.76	-57.07	10.91	-9999	-9999	-9999
2006	247	58800	59400	59100	85.6	3.83	-68.11	-62.84	-57.2	10.91	-9999	-9999	-9999
2006	247	59400	60000	59700	81.6	3.75	-68.06	-62.98	-56.32	11.74	-9999	-9999	-9999
2006	247	60000	60600	60300	81.5	3.56	-68.26	-62.89	-56.19	12.07	-9999	-9999	-9999
2006	247	60600	61200	60900	79.1	3.58	-67.86	-62.51	-55.03	12.83	-9999	-9999	-9999
2006	247	61200	61800	61500	80.7	4.1	-67.65	-62.57	-55.1	12.55	-9999	-9999	-9999
2006	247	61800	62400	62100	81.6	4.49	-67.21	-62.94	-55.22	11.99	-9999	-9999	-9999
2006	247	62400	63000	62700	69.2	4.64	-66.84	-62.31	-53.87	12.97	-9999	-9999	-9999
2006	247	63000	63600	63300	62.8	4.7	-66.58	-61.7	-53.32	13.26	-9999	-9999	-9999
2006	247	63600	64200	63900	66.7	4.63	-66.45	-62	-52.41	14.04	-9999	-9999	-9999
2006	247	64200	64800	64500	65.3	4.5	-66.51	-61.77	-51.68	14.83	-9999	-9999	-9999
2006	247	64800	65400	65100	60.7	4.43	-66.63	-61.7	-52.95	13.68	-9999	-9999	-9999
2006	247	65400	66000	65700	46.7	4.33	-66.76	-58.28	-53.35	13.41	-9999	-9999	-9999
2006	247	66000	66600	66300	35.9	3.47	-66.65	-56.52	-53.54	13.11	-9999	-9999	-9999
2006	247	66600	67200	66900	23.9	3.12	-66.94	-54.4	-53.41	13.53	-9999	-9999	-9999
2006	247	67200	67800	67500	31.1	3.37	-66.6	-54.49	-52.95	13.65	-9999	-9999	-9999
2006	247	67800	68400	68100	37.1	3.4	-66.52	-55.43	-52.87	13.65	-9999	-9999	-9999
2006	247	68400	69000	68700	37.9	3.66	-66.58	-56.57	-53.15	13.43	-9999	-9999	-9999
2006	247	69000	69600	69300	32.1	4.3	-66.79	-55.56	-53.18	13.61	-9999	-9999	-9999
2006	247	69600	70200	69900	39	4.22	-66.16	-56.84	-53.34	12.82	-9999	-9999	-9999
2006	247	70200	70800	70500	34.3	4.46	-66.51	-57.27	-53.53	12.98	-9999	-9999	-9999
2006	247	70800	71400	71100	23	4.22	-66.79	-54.46	-53.39	13.4	-9999	-9999	-9999
2006	247	71400	72000	71700	22.6	3.75	-66.87	-54.64	-53.44	13.43	-9999	-9999	-9999
2006	247	72000	72600	72300	21.9	2.87	-67.48	-55.49	-53.9	13.58	-9999	-9999	-9999
2006	247	72600	73200	72900	37	2.2	-68.03	-58.4	-54.67	13.36	-9999	-9999	-9999
2006	247	73200	73800	73500	50.6	2.58	-69.12	-59.51	-55.1	14.02	-9999	-9999	-9999
2006	247	73800	74400	74100	55.2	3.32	-69.21	-60.6	-54.96	14.25	-9999	-9999	-9999
2006	247	74400	75000	74700	61.2	3.24	-69.02	-62.13	-54.91	14.11	-9999	-9999	-9999
2006	247	75000	75600	75300	66.1	3.6	-69.43	-62.7	-55.09	14.34	-9999	-9999	-9999
2006	247	75600	76200	75900	63.8	3.93	-69.37	-62.7	-54.73	14.64	-9999	-9999	-9999
2006	247	76200	76800	76500	50.6	3.9	-68.75	-60.86	-54.39	14.36	-9999	-9999	-9999
2006	247	76800	77400	77100	40.6	3.64	-68.26	-59.04	-54.01	14.25	-9999	-9999	66.8544
2006	247	77400	78000	77700	32.6	3.57	-68.06	-57.45	-53.82	14.24	-9999	-9999	61.107
2006	247	78000	78600	78300	39.6	3.78	-66.76	-57.72	-54.31	12.45	-9999	-9999	57.4232
2006	247	78600	79200	78900	39	3.97	-66.37	-58.32	-54.69	11.68	-9999	-9999	54.9951
2006	247	79200	79800	79500	41.5	3.88	-66.39	-58.68	-54.8	11.59	-9999	-9999	57.4605
2006	247	79800	80400	80100	47	4.25	-66.48	-59.68	-55.09	11.39	-9999	-9999	55.9276
2006	247	80400	81000	80700	50.6	4.67	-66.49	-59.7	-54.93	11.56	-9999	-9999	57.8686
2006	247	81000	81600	81300	39.8	4.13	-66.87	-59.57	-54.69	12.18	-9999	-9999	56.7193
2006	247	81600	82200	81900	32	3.03333	-67.0667	-59.267	-54.8667	12.2	-9999	-9999	60.7883
2006	247	82200	82800	82500	48.625	2.1125	-67.4625	-60.75	-55.25	12.2125	-9999	-9999	57.0894
2006	247	82800	83400	83100	47.4	2.94	-67.7	-60.8	-55.38	12.32	-9999	-9999	55.0202
2006	247	83400	84000	83700	38.8	3.65	-68.24	-59.64	-55.22	13.02	-9999	-9999	54.4161
2006	247	84000	84600	84300	31.2	3.92	-68.2	-58.72	-55.01	13.19	-9999	-9999	53.5498
2006	247	84600	85200	84900	23.2	3.57	-68.36	-58.3	-55.01	13.35	-9999	-9999	55.9534
2006	247	85200	85800	85500	20.3	4.15	-68.73	-57.61	-54.99	13.74	-9999	-9999	53.544
2006	247	85800.1	86400	86100	18.8995	4.39002	-68.8	-56.99	-54.6699	14.1301	-9999	-9999	49.9113
2006	248	0	600	300	21.4	4.54	-69.22	-56.69	-54.44	14.78	-9999	-9999	48.8262
2006	248	600	1200	900	18.4	4.49	-69.21	-56.9	-55.33	13.88	-9999	-9999	48.4955
2006	248	1200	1800	1500	14.3	4.83	-68.77	-56.62	-54.85	13.92	-9999	-9999	45.8912
2006	248	1800	2400	2100	11.4	5.03	-67	-56.61	-54.96	12.04	-9999	-9999	41.7873
2006	248	2400	3000	2700	6.9	4.86	-66.18	-56.57	-54.58	11.6	-9999	-9999	42.6458
2006	248	3000	3600	3300	7.6	5.18	-64.86	-56.64	-54.1	10.76	-9999	-9999	41.4236
2006	248	3600	4200	3900	8.2	5.55	-62.73	-56.9	-54.1	8.63	-9999	-9999	39.5823
2006	248	4200	4800	4500	11	5.86	-62.81	-57.15	-54.8	8.01	-9999	-9999	42.0113
2006	248	4800	5400	5100	16.4	5.23	-63.03	-57.66	-55.74	7.29	-9999	-9999	41.5141
2006	248	5400	6000	5700	20.4	4.93	-64.96	-58.71	-56.24	8.72	-9999	-9999	42.6218
2006	248	6000	6600	6300	15.4	5.52	-63.94	-58.23	-56.31	7.63	-9999	-9999	40.8939
2006	248	6600	7200	6900	15.2	5.37	-64.02	-58.78	-56.67	7.35	-22.0401	-9999	39.1303
2006	248	7200	7800	7500	19	4.78	-65	-59.75	-57.1	7.9	-16.2661	-1.3889	39.7669
2006	248	7800	8400	8100	20.1	4.8	-64.55	-59.76	-57.39	7.16	-14.3105	-1.19639	40.0375
2006	248	8400	9000	8700	24.8	4.59	-66.41	-60.3	-57.94	8.47	-13.2759	1.49971	39.2929
2006	248	9000	9600	9300	25.6	4.65	-66.18	-60.81	-57.84	8.34	-10.4748	-0.646899	38.8488
2006	248	9600	10200	9900	22.6	5.03	-65.39	-60.65	-57.26	8.13	-13.4193	4.04499	38.8136
2006	248	10200	10800	10500	20.1	5.81	-63.85	-60.34	-56.86	6.99	-11.4229	3.70295	39.6938
2006	248	10800	11400	11100	14.7	6.66	-62.94	-59.06	-56.77	6.17	-13.797	3.06124	40.0831
2006	248	11400	12000	11700	13.4	6.8	-62.8	-58.68	-57.29	5.51	-11.9539	0.776214	38.2018
2006	248	12000	12600	12300	24.2	4.66	-63.35	-60.14	-57.95	5.4	0.658915	6.14795	42.0367
2006	248	12600	13200	12900	30.7	4.14	-63.43	-61.56	-58.57	4.86	-8.35049	2.11898	38.8193
2006	248	13200	13800	13500	13.3	5.61	-63.46	-60.25	-57.95	5.51	-9.1139	9.37934	40.824
2006	248	13800	14400	14100	16.5	5.43	-64.1	-60.35	-58.06	6.04	-6.5816	4.76432	38.8558
2006	248	14400	15000	14700	26	4.57	-65.58	-61.47	-58.33	7.25	2.85912	1.73661	41.363
2006	248	15000	15600	15300	18.2	6.44	-63.94	-60.68	-58.62	5.32	-2.17014	6.44764	40.2423
2006	248	15600	16200	15900	14	5.42	-63.37	-60.82	-58.66	4.71	1.38349	7.01174	39.6215
2006	248	16200	16800	16500	10.7	5.66	-63.6	-61.03	-58.33	5.27	-1.62838	1.03117	40.0759
2006	248	16800	17400	17100	8.3	6.24	-63.97	-61.16	-58.08	5.89	-0.376262	6.2409	41.3174
2006	248	17400	18000	17700	6.9	6.82	-64.01	-60.79	-56.78	7.23	-1.95868	8.84628	41.2414
2006	248	18000	18600	18300	8.9	6.32	-63.67	-61.24	-57.48	6.19	-4.95509	14.1157	41.2181
2006	248	18600	19200	18900	8.3	5.94	-63.61	-61.94	-58.49	5.12	-0.424342	8.49315	42.6812
2006	248	19200	19800	19500	3.9	6.43	-63.8	-61.97	-58.88	4.92	1.25694	10.3776	40.5371
2006	248	19800	20400	20100	3.6	6.21	-64.1	-61.91	-59.01	5.09	4.80712	7.73434	40.6275
2006	248	20400	21000	20700	6.8	6.41	-64.15	-62.16	-59.28	4.87	-0.982693	10.4691	41.5992
2006	248	21000	21600	21300	9.1	7.22	-63.99	-61.73	-57.59	6.4	6.70104	7.83841	41.6335
2006	248	21600	22200	21900	12.6	7.13	-63.68	-61.65	-57.83	5.85	2.64713	8.96202	41.9434
2006	248	22200	22800	22500	11.2	6.89	-63.65	-61.81	-58.53	5.12	2.57017	8.20101	41.8233
2006	248	22800	23400	23100	10.6	6.8	-63.79	-62.45	-59.34	4.45	3.92369	5.95975	41.8669
2006	248	23400	24000	23700	10.8	6.68	-63.76	-62.72	-59.84	3.92	4.30685	8.4512	41.9329
2006	248	24000	24600	24300	9.7	7.38	-63.72	-62.81	-60.43	3.29	2.44054	10.1666	43.2301
2006	248	24600	25200	24900	7.6	7.73	-63.83	-62.96	-60.62	3.21	4.10749	6.16233	43.1566
2006	248	25200	25800	25500	4.8	7.2	-63.92	-63.14	-60.88	3.04	0.463979	5.21153	42.6893
2006	248	25800	26400	26100	3.7	6.24	-63.97	-63.25	-61.85	2.12	4.96746	8.5343	42.6054
2006	248	26400	27000	26700	11	4.51	-63.93	-63.31	-62.41	1.52	0.718737	8.63967	45.2981
2006	248	27000	27600	27300	19.9	2.25	-63.92	-63.54	-62.97	0.95	1.51287	19.203	46.713
2006	248	27600	28200	27900	15.5	5.02	-64.03	-63.17	-62.46	1.57	3.14118	3.04451	43.1857
2006	248	28200	28800	28500	19.1	5.05	-64.6	-63.04	-62.04	2.56	-8.81951	-4.58803	43.3967
2006	248	28800	29400	29100	26.6	3.91	-64.65	-63.67	-62.29	2.36	-9999	-9999	-9999
2006	248	29400	30000	29700	23.4	5.42	-64.58	-63.37	-61.8	2.78	-9999	-9999	-9999
2006	248	30000	30600	30300	17.5	6.48	-64.51	-63.36	-61.76	2.75	5.95759	-9999	50.3793
2006	248	30600	31200	30900	12.1	7.42	-64.28	-63.26	-61.56	2.72	2.54196	6.40255	49.3514
2006	248	31200	31800	31500	12.3	7.98	-64.06	-63.13	-61.12	2.94	6.08187	-2.01358	45.5275
2006	248	31800	32400	32100	11.2	7.13	-64.01	-63.19	-61.11	2.9	4.06322	12.0617	46.3284
2006	248	32400	33000	32700	16.2	5.8	-64.04	-63.27	-61.45	2.59	1.83508	-9999	44.5583
2006	248	33000	33600	33300	18.5	5.16	-64.2	-63.52	-62.28	1.92	5.03115	1.52187	44.7652
2006	248	33600	34200	33900	20	5.95	-64.36	-63.71	-62.46	1.9	2.88043	7.22817	44.126
2006	248	34200	34800	34500	13.7	7.38	-64.28	-63.53	-61.75	2.53	3.23434	19.1794	44.4228
2006	248	34800	35400	35100	14.8	6.88	-64.03	-63.34	-61.67	2.36	4.41717	12.6777	43.6337
2006	248	35400	36000	35700	23.3	5.17	-64.13	-63.53	-62.45	1.68	0.987441	13.4033	43.3279
2006	248	36000	36600	36300	29.2	4.87	-64.25	-63.68	-62.8	1.45	5.34638	12.6649	44.4298
2006	248	36600	37200	36900	14.6	6.41	-64.06	-63.41	-62.1	1.96	3.01965	2.48813	43.8002
2006	248	37200	37800	37500	8.9	6.92	-63.98	-63.24	-61.89	2.09	1.97867	16.9096	44.5714
2006	248	37800	38400	38100	7.6	6.96	-64.15	-63.44	-62.02	2.13	-0.38497	23.6153	42.7262
2006	248	38400	39000	38700	7.6	7.34	-64.28	-63.58	-61.83	2.45	2.90029	6.34813	41.9426
2006	248	39000	39600	39300	8.4	7.34	-64.22	-63.47	-61.52	2.7	3.10398	11.1094	44.3832
2006	248	39600	40200	39900	7.1	6.82	-64.24	-63.43	-61.15	3.09	5.5882	5.03345	44.4455
2006	248	40200	40800	40500	7.3	7.89	-64.48	-63.43	-60.82	3.66	4.50647	4.23622	44.3319
2006	248	40800	41400	41100	7.6	8.13	-64.6	-63.8	-61.14	3.46	1.80499	9.23937	44.8637
2006	248	41400	42000	41700	8.3	8.35	-64.67	-63.98	-61.74	2.93	1.55521	15.9797	45.3172
2006	248	42000	42600	42300	7.7	8.52	-64.82	-64.18	-62.08	2.74	5.28044	-1.036	44.2694
2006	248	42600	43200	42900	7.5	8.55	-64.9	-64.36	-62.62	2.28	0.199236	9.86774	42.5821
2006	248	43200	43800	43500	8	8.21	-64.93	-64.44	-62.89	2.04	1.94061	8.58576	46.2537
2006	248	43800	44400	44100	7.7	7.87	-64.96	-64.48	-62.99	1.97	3.44407	4.43849	45.4911
2006	248	44400	45000	44700	5.5	7.4	-64.84	-64.38	-62.83	2.01	2.39759	0.719193	42.8661
2006	248	45000	45600	45300	7.2	7.47	-64.64	-64.22	-62.81	1.83	3.00383	14.7503	42.1087
2006	248	45600	46200	45900	8.8	7.8	-64.51	-64.14	-62.98	1.53	3.92893	6.06898	43.5477
2006	248	46200	46800	46500	8.4	7.74	-64.6	-64.29	-63.19	1.41	0.860511	15.5366	44.5787
2006	248	46800	47400	47100	9.7	7.69	-64.64	-64.31	-63.2	1.44	1.69936	20.0904	43.6595
2006	248	47400	48000	47700	10.6	7.81	-64.58	-64.28	-63.27	1.31	-0.678588	6.73853	44.5278
2006	248	48000	48600	48300	10	8.35	-64.5	-64.24	-62.97	1.53	0.131262	6.28634	42.7258
2006	248	48600	49200	48900	10	8.57	-64.33	-64.06	-62.56	1.77	2.43229	13.4499	46.3049
2006	248	49200	49800	49500	10.4	8.76	-63.82	-63.59	-62.16	1.66	0.848938	14.6883	43.5807
2006	248	49800	50400	50100	9.3	9.11	-63.45	-63.23	-62.13	1.32	3.80746	-5.23937	45.0717
2006	248	50400	51000	50700	7.3	8.75	-63.37	-63.19	-62.3	1.07	3.15272	-1.13279	42.3724
2006	248	51000	51600	51300	7.2	8.6	-63.41	-63.23	-62.14	1.27	2.46664	0.467412	43.6171
2006	248	51600	52200	51900	5.8	8.88	-63.34	-63.18	-61.94	1.4	2.95053	5.85019	42.0015
2006	248	52200	52800	52500	4.6	8.72	-62.99	-62.85	-61.7	1.29	3.71306	3.90368	43.3416
2006	248	52800	53400	53100	3.1	8.55	-62.69	-62.53	-61.35	1.34	2.8254	7.86566	43.3062
2006	248	53400	54000	53700	1.3	8.34	-62.48	-62.32	-61.37	1.11	3.44068	12.9291	43.0501
2006	248	54000	54600	54300	0.8	8.71	-62.28	-62.2	-61.59	0.69	2.04503	-7.21478	40.9959
2006	248	54600	55200	54900	1.2	8.9	-62.27	-62.2	-61.69	0.58	7.21961	14.4344	43.9735
2006	248	55200	55800	55500	1.8	9.16	-62.25	-62.23	-61.81	0.44	4.93947	-2.77366	42.9569
2006	248	55800	56400	56100	0.7	8.65	-62.32	-62.31	-61.93	0.39	2.27858	8.93226	44.2789
2006	248	56400	57000	56700	1.4	8.27	-62.4	-62.41	-62.14	0.26	3.16788	-5.0667	43.432
2006	248	57000	57600	57300	3.1	8.39	-62.45	-62.51	-62.21	0.24	2.90381	7.7487	43.1394
2006	248	57600	58200	57900	4.6	8.65	-62.41	-62.5	-62.21	0.2	7.15579	-1.92598	44.1916
2006	248	58200	58800	58500	6	8.79	-62.35	-62.43	-61.99	0.36	2.64175	8.47842	42.0818
2006	248	58800	59400	59100	3.6	8.59	-62.04	-62.16	-61.67	0.37	5.56836	9.84963	42.8441
2006	248	59400	60000	59700	1.5	8.45	-61.93	-62.02	-61.65	0.28	2.48066	4.36099	44.0722
2006	248	60000	60600	60300	2.3	8.25	-61.76	-61.9	-61.62	0.14	5.98946	7.07961	44.9011
2006	248	60600	61200	60900	3	8.59	-61.52	-61.64	-61.41	0.11	-0.329416	4.9378	43.5118
2006	248	61200	61800	61500	0.6	8.97	-61.3	-61.4	-60.99	0.31	1.61654	9.91668	41.7578
2006	248	61800	62400	62100	359.5	9.33	-61.06	-61.18	-60.81	0.25	4.69419	6.88938	39.9131
2006	248	62400	63000	62700	358.8	9.38	-60.93	-61.01	-60.62	0.31	2.73106	0.950138	41.2745
2006	248	63000	63600	63300	359.2	9.65	-60.92	-60.95	-60.56	0.36	6.56632	12.2704	41.6039
2006	248	63600	64200	63900	1.7	9.43	-60.98	-61	-60.56	0.42	1.10594	20.653	42.5462
2006	248	64200	64800	64500	1.7	9.27	-60.74	-60.76	-60.27	0.47	2.64646	9.82376	41.8118
2006	248	64800	65400	65100	1	8.89	-60.65	-60.73	-60.48	0.17	2.53975	4.93323	40.9133
2006	248	65400	66000	65700	359.5	9.23	-60.54	-60.63	-60.43	0.11	5.44424	-5.41884	41.5822
2006	248	66000	66600	66300	359.8	9.42	-60.51	-60.63	-60.47	0.04	4.35796	3.41638	42.935
2006	248	66600	67200	66900	0.7	9.37	-60.31	-60.45	-60.21	0.1	1.64635	-1.22939	42.5498
2006	248	67200	67800	67500	1.7	9.62	-60.28	-60.41	-60.21	0.07	7.84181	-4.80828	44.108
2006	248	67800	68400	68100	2.8	9.65	-60.13	-60.26	-60.02	0.11	-9999	5.98308	42.629
2006	248	68400	69000	68700	0.6	9.41	-59.83	-59.98	-59.72	0.11	-9999	-9999	-9999
2006	248	69000	69600	69300	358.9	9.38	-59.64	-59.79	-59.53	0.11	-9999	-9999	-9999
2006	248	69600	70200	69900	1.4	9.23	-59.65	-59.79	-59.54	0.11	7.08035	-9999	-9999
2006	248	70200	70800	70500	359.8	9.15	-59.56	-59.57	-59.1	0.46	3.32443	21.2174	47.6295
2006	248	70800	71400	71100	359.7	8.85	-59.59	-59.63	-59.1	0.49	2.01689	20.4016	44.7222
2006	248	71400	72000	71700	359.1	8.81	-59.5	-59.57	-59.14	0.36	10.8569	9.80965	43.0993
2006	248	72000	72600	72300	358.6	8.77	-59.39	-59.45	-59.1	0.29	-0.222528	-9999	42.1625
2006	248	72600	73200	72900	358.8	8.94	-59.43	-59.53	-59.31	0.12	1.10203	20.8821	44.4484
2006	248	73200	73800	73500	358.8	9.05	-59.32	-59.43	-59.21	0.11	5.01552	5.42162	43.7493
2006	248	73800	74400	74100	359.2	9.03	-59.21	-59.28	-58.95	0.26	5.78903	20.6575	45.7838
2006	248	74400	75000	74700	358.6	9.21	-59.05	-59.13	-58.81	0.24	3.04068	19.6202	43.5339
2006	248	75000	75600	75300	357.4	8.81	-59.04	-59.11	-58.76	0.28	-0.951064	10.2783	43.7247
2006	248	75600	76200	75900	358.5	8.93	-59.03	-59.13	-58.84	0.19	7.50362	13.1069	43.4003
2006	248	76200	76800	76500	0.2	8.65	-59.02	-59.13	-58.93	0.09	6.74044	-2.05514	44.7853
2006	248	76800	77400	77100	359.6	8.33	-59.1	-59.16	-58.98	0.12	-1.53366	9.50667	44.3922
2006	248	77400	78000	77700	359.6	8.42	-59.11	-59.19	-59.03	0.08	1.26204	11.1442	42.8835
2006	248	78000	78600	78300	357.2	7.87	-59.07	-59.1	-58.79	0.28	5.74546	11.3538	41.3013
2006	248	78600	79200	78900	355.4	7.62	-59.01	-59.04	-58.78	0.23	0.461823	21.0989	43.3256
2006	248	79200	79800	79500	0.6	7.75	-58.89	-58.98	-58.7	0.19	1.42183	8.99057	44.4709
2006	248	79800	80400	80100	1.3	7.72	-58.75	-58.79	-58.49	0.26	2.67797	12.4059	44.6456
2006	248	80400	81000	80700	0.7	7.59	-58.61	-58.67	-58.37	0.24	3.05551	1.92916	42.9802
2006	248	81000	81600	81300	1.9	7.38	-58.6	-58.63	-58.4	0.2	0.994461	8.32567	44.1022
2006	248	81600	82200	81900	2.4	7.27	-58.63	-58.69	-58.44	0.19	1.90532	9.67924	45.151
2006	248	82200	82800	82500	3.4	7.74	-58.6	-58.67	-58.39	0.21	2.92438	9.45562	45.9018
2006	248	82800	83400	83100	5	7.76	-58.57	-58.64	-58.35	0.22	3.5743	-0.528807	43.3626
2006	248	83400	84000	83700	7.6	7.82	-58.44	-58.49	-58.2	0.24	3.76615	0.0697615	44.5207
2006	248	84000	84600	84300	7.2	7.65	-58.37	-58.38	-58.03	0.34	2.94068	10.5229	43.2228
2006	248	84600	85200	84900	5	7.78	-58.26	-58.26	-58	0.26	4.16474	-0.357923	41.9231
2006	248	85200	85800	85500	7	7.96	-58.28	-58.28	-58.02	0.26	0.757982	2.81115	43.7734
2006	248	85800.1	86400	86100	5.79997	7.78998	-58.49	-58.5	-58.3201	0.169995	3.709	14.0792	43.661
2006	249	0	600	300	3.4	7.47	-58.7	-58.71	-58.6	0.1	-0.51798	-0.540782	45.9675
2006	249	600	1200	900	4.2	6.97	-58.91	-58.93	-58.79	0.12	-9999	-9999	43.5104
2006	249	1200	1800	1500	4.2	6.31	-59.05	-59.1	-59	0.05	1.02143	-9999	42.0098
2006	249	1800	2400	2100	3.8	7.14	-59.1	-59.16	-58.98	0.12	0.20607	5.17303	43.4529
2006	249	2400	3000	2700	3.3	8.08	-59.06	-59.14	-58.95	0.11	5.94106	5.77398	43.7802
2006	249	3000	3600	3300	3.3	8.39	-59.09	-59.12	-58.98	0.11	8.1311	-3.58175	43.9368
2006	249	3600	4200	3900	2.7	8.32	-59.14	-59.17	-59.03	0.11	4.1306	-1.2228	46.6253
2006	249	4200	4800	4500	3.1	8.28	-59.2	-59.2	-59.1	0.1	4.23776	-4.24656	45.4868
2006	249	4800	5400	5100	1	8.45	-59.28	-59.3	-59.12	0.16	1.71699	1.42271	45.3884
2006	249	5400	6000	5700	358.8	8.85	-59.35	-59.38	-59.18	0.17	3.82488	3.46655	46.6089
2006	249	6000	6600	6300	359.1	8.92	-59.5	-59.49	-59.29	0.21	0.718974	14.9088	44.8453
2006	249	6600	7200	6900	359.3	8.92	-59.6	-59.55	-59.34	0.26	2.39623	0.0743081	45.8143
2006	249	7200	7800	7500	1.1	8.68	-59.6	-59.57	-59.38	0.22	3.49544	-1.49911	45.7323
2006	249	7800	8400	8100	359.2	8.59	-59.69	-59.7	-59.55	0.14	5.67899	10.0542	43.7517
2006	249	8400	9000	8700	359.6	8.88	-59.79	-59.8	-59.6	0.19	4.76699	13.689	44.4376
2006	249	9000	9600	9300	0.2	8.94	-59.71	-59.71	-59.49	0.22	4.27757	0.21835	47.5097
2006	249	9600	10200	9900	0.1	8.98	-59.58	-59.58	-59.35	0.23	4.77467	5.46308	47.1583
2006	249	10200	10800	10500	359.1	8.91	-59.6	-59.58	-59.36	0.24	2.18933	5.32239	46.3882
2006	249	10800	11400	11100	357.7	9.26	-59.61	-59.56	-59.3	0.31	3.44696	8.01827	46.7394
2006	249	11400	12000	11700	357	9.63	-59.71	-59.71	-59.48	0.23	3.99907	11.3283	46.0454
2006	249	12000	12600	12300	357.6	10.03	-59.72	-59.72	-59.45	0.27	-2.44301	17.5399	46.0058
2006	249	12600	13200	12900	358	9.82	-59.7	-59.68	-59.4	0.3	3.29971	13.8417	46.586
2006	249	13200	13800	13500	358.1	9.28	-59.71	-59.65	-59.32	0.39	1.03581	10.2147	45.8981
2006	249	13800	14400	14100	1.5	9.03	-59.79	-59.7	-59.37	0.42	2.15199	0.82651	45.9595
2006	249	14400	15000	14700	3.5	8.93	-59.83	-59.76	-59.44	0.39	3.25739	2.85349	49.7961
2006	249	15000	15600	15300	1.5	9.26	-59.86	-59.79	-59.45	0.41	4.34713	-12.557	48.4867
2006	249	15600	16200	15900	1.6	9.38	-59.8	-59.71	-59.33	0.47	0.929016	7.58903	47.2518
2006	249	16200	16800	16500	3.3	8.96	-59.85	-59.76	-59.45	0.4	1.77662	16.6274	46.7509
2006	249	16800	17400	17100	5	8.72	-59.88	-59.83	-59.54	0.34	2.31924	13.5747	46.4208
2006	249	17400	18000	17700	4.7	9	-59.83	-59.75	-59.35	0.48	5.26883	7.90927	49.5128
2006	249	18000	18600	18300	6.3	8.57	-59.71	-59.6	-59.23	0.48	5.72156	6.21071	49.6599
2006	249	18600	19200	18900	10.6	7.79	-59.53	-59.4	-59	0.53	4.31495	-5.23891	48.2736
2006	249	19200	19800	19500	4.2	8.9	-59.55	-59.38	-59	0.55	-1.98696	12.9296	47.8363
2006	249	19800	20400	20100	1.4	9.66	-59.67	-59.48	-59.1	0.57	0.218507	23.6386	47.4372
2006	249	20400	21000	20700	1.2	9.8	-59.9	-59.72	-59.37	0.53	3.46563	9.65164	47.2233
2006	249	21000	21600	21300	2.1	9.49	-60	-59.86	-59.55	0.45	-23.7808	-1.84036	47.8176
2006	249	21600	22200	21900	4.2	8.62	-60.18	-60.06	-59.76	0.42	-9999	-9999	-9999
2006	249	22200	22800	22500	2.8	8.76	-60.24	-60.11	-59.79	0.45	-9999	-9999	-9999
2006	249	22800	23400	23100	3.4	8.48	-60.38	-60.32	-60.04	0.34	3.14425	-9999	-9999
2006	249	23400	24000	23700	4.2	8.72	-60.47	-60.44	-60.16	0.31	1.37226	31.4758	-9999
2006	249	24000	24600	24300	2.4	8.7	-60.51	-60.45	-60.2	0.31	1.08735	14.3464	48.8006
2006	249	24600	25200	24900	4.4	8.68	-60.6	-60.53	-60.2	0.4	-4.85053	24.414	48.4884
2006	249	25200	25800	25500	5.4	8.95	-60.61	-60.54	-60.21	0.4	3.42016	-9999	55.2547
2006	249	25800	26400	26100	4.3	9.17	-60.64	-60.52	-60.16	0.48	-1.71515	14.7527	51.0972
2006	249	26400	27000	26700	3.3	9.4	-60.51	-60.38	-60.09	0.42	2.40816	21.3991	51.6046
2006	249	27000	27600	27300	2.7	8.89	-60.44	-60.31	-60	0.44	3.1194	12.2999	49.483
2006	249	27600	28200	27900	10	7.56	-60.55	-60.38	-60.05	0.5	1.15656	4.49668	49.6621
2006	249	28200	28800	28500	30.6	5.13	-60.56	-60.47	-60.2	0.36	2.36051	10.1404	51.8885
2006	249	28800	29400	29100	52.2	4.09	-60.81	-60.7	-60.55	0.26	7.01068	5.51462	51.8169
2006	249	29400	30000	29700	27.8333	5.46667	-60.9333	-60.8	-60.6333	0.3	5.26938	3.01013	52.3665
2006	249	30000	30600	30300	16.8	7.43	-60.82	-60.71	-60.36	0.46	7.46183	-4.7136	50.6825
2006	249	30600	31200	30900	14.1	7.74	-60.69	-60.53	-60.01	0.68	0.668517	9.73265	50.4591
2006	249	31200	31800	31500	20	6.77143	-60.5286	-60.414	-59.9857	0.542857	5.04018	16.5648	49.3576
2006	249	31800	32400	32100	44.2	4.59	-60.64	-60.51	-60.31	0.33	4.75942	16.4074	48.8024
2006	249	32400	33000	32700	32.2222	4.91111	-60.85	-60.78	-60.7	0.15	5.90261	-1.63343	50.1327
2006	249	33000	33600	33300	11.8	6.55	-60.98	-60.95	-60.78	0.2	3.67983	18.8244	47.5915
2006	249	33600	34200	33900	3.83333	9.1	-60.8333	-60.767	-60.5	0.333333	-0.340182	5.33032	49.7949
2006	249	34200	34800	34500	2.1	9.99	-60.7	-60.59	-60.3	0.4	2.33846	5.36796	48.9151
2006	249	34800	35400	35100	0.9	9.24	-60.74	-60.58	-60.35	0.39	2.24127	11.4677	49.391
2006	249	35400	36000	35700	3.2	9.83	-60.63	-60.53	-60.21	0.42	4.20808	17.5397	49.5055
2006	249	36000	36600	36300	2	9.24	-60.52	-60.42	-60.02	0.5	5.0891	17.0062	48.2081
2006	249	36600	37200	36900	3.5	9.26	-60.46	-60.36	-59.98	0.48	2.89134	12.2367	46.7788
2006	249	37200	37800	37500	1.7	8.76	-60.31	-60.22	-59.9	0.41	4.29995	1.60482	47.7883
2006	249	37800	38400	38100	1.6	8.51	-60.24	-60.15	-59.84	0.4	2.31684	5.73304	47.5827
2006	249	38400	39000	38700	2.7	8.84	-60.14	-60.05	-59.73	0.41	4.33663	7.3404	49.2011
2006	249	39000	39600	39300	2.9	8.85	-60.09	-60	-59.68	0.41	6.13474	10.6912	47.1329
2006	249	39600	40200	39900	3.3	8.63	-60.05	-59.97	-59.7	0.35	6.22646	-1.78969	45.7502
2006	249	40200	40800	40500	3.2	8.23	-60.05	-59.98	-59.75	0.3	4.39447	6.85001	47.4746
2006	249	40800	41400	41100	5	8.04	-60.1	-60.06	-59.8	0.3	5.2178	13.3662	47.8986
2006	249	41400	42000	41700	5.9	7.98	-60.09	-60.08	-59.86	0.23	0.847255	28.9327	48.1645
2006	249	42000	42600	42300	5.7	8.2	-60.18	-60.13	-59.93	0.25	0.629596	11.3745	46.7458
2006	249	42600	43200	42900	4.8	8.22	-60.2	-60.12	-59.9	0.3	3.5581	27.2377	47.0921
2006	249	43200	43800	43500	4.6	8.08	-60.25	-60.2	-59.99	0.26	1.92135	-0.416837	45.8566
2006	249	43800	44400	44100	6.7	7.88	-60.36	-60.32	-60.11	0.25	2.52154	17.9207	47.4062
2006	249	44400	45000	44700	6.9	8	-60.46	-60.45	-60.21	0.25	6.72151	-1.91349	46.705
2006	249	45000	45600	45300	7.5	8.14	-60.5	-60.5	-60.2	0.3	2.81904	-10.2027	47.4729
2006	249	45600	46200	45900	7.3	7.61	-60.51	-60.48	-60.19	0.32	1.34433	16.2348	47.6333
2006	249	46200	46800	46500	12.1	6.39	-60.57	-60.57	-60.27	0.3	3.7017	0.0659473	48.7012
2006	249	46800	47400	47100	14.8	5.97	-60.5	-60.5	-60.2	0.3	3.15643	10.2608	46.6699
2006	249	47400	48000	47700	15.2	6.38	-60.51	-60.49	-60.18	0.33	6.09927	17.5298	47.235
2006	249	48000	48600	48300	12.4	7.19	-60.62	-60.54	-60.2	0.42	3.1607	13.0191	48.9042
2006	249	48600	49200	48900	10.2	7.71	-60.69	-60.6	-60.16	0.53	3.05341	-3.28614	48.3021
2006	249	49200	49800	49500	9.4	7.6	-60.6	-60.49	-60.05	0.55	4.75386	-6.4218	47.4323
2006	249	49800	50400	50100	12	7.27	-60.83	-60.71	-60.27	0.56	5.02451	19.167	50.4779
2006	249	50400	51000	50700	9.7	7.12	-61.04	-60.94	-60.53	0.51	2.23391	6.31822	46.7339
2006	249	51000	51600	51300	8.7	7.35	-61.19	-61.03	-60.57	0.62	3.15797	5.87628	47.1889
2006	249	51600	52200	51900	9.2	7.69	-61.18	-61	-60.47	0.71	3.2016	-1.07793	47.7078
2006	249	52200	52800	52500	11	7.46	-61.3	-61.1	-60.51	0.79	5.53668	7.40509	49.1351
2006	249	52800	53400	53100	14.1	7.23	-61.39	-61.16	-60.61	0.78	2.99199	3.22876	50.3679
2006	249	53400	54000	53700	14.8571	7.17143	-61.3429	-61.129	-60.5571	0.785714	1.05926	6.25331	47.1929
2006	249	54000	54600	54300	15.5	7.09	-61.47	-61.21	-60.6	0.87	5.2415	15.2038	49.0954
2006	249	54600	55200	54900	15.2	7.14	-61.43	-61.14	-60.39	1.04	2.24882	15.6923	47.0204
2006	249	55200	55800	55500	17.8571	7.54286	-61.3286	-61.029	-60.2714	1.05714	0.667304	19.7639	48.9138
2006	249	55800	56400	56100	19	7.31	-61.35	-61.03	-60.3	1.05	5.00149	31.245	48.5745
2006	249	56400	57000	56700	18.5	7.22	-61.33	-61.04	-60.34	0.99	3.95944	-0.808877	47.951
2006	249	57000	57600	57300	19.5	6.77	-61.26	-60.96	-60.31	0.95	4.54133	6.35033	46.4608
2006	249	57600	58200	57900	24.1	5.93	-61.48	-61.21	-60.77	0.71	4.48849	-4.63357	49.1565
2006	249	58200	58800	58500	16.4	7.47	-61.74	-61.49	-60.9	0.84	2.40221	5.5154	49.5445
2006	249	58800	59400	59100	13	8.05	-61.5625	-61.263	-60.5625	1	3.83992	11.4433	49.397
2006	249	59400	60000	59700	12.4444	8	-61.5444	-61.244	-60.5111	1.03333	3.16494	10.2107	47.2917
2006	249	60000	60600	60300	11.9	7.63	-61.5	-61.21	-60.44	1.06	3.98752	4.07655	49.2044
2006	249	60600	61200	60900	13.1	7.99	-61.47	-61.06	-60.22	1.25	10.2674	-7.43143	49.0808
2006	249	61200	61800	61500	11.4	7.94	-61.47	-61.06	-60.23	1.24	-9999	-9999	-9999
2006	249	61800	62400	62100	10.7	7.95	-61.4	-61.03	-60.27	1.13	-9999	-9999	-9999
2006	249	62400	63000	62700	12.8571	8.2	-61.3714	-61	-60.2143	1.15714	4.91629	-9999	-9999
2006	249	63000	63600	63300	15	7.95	-61.36	-60.96	-60.15	1.21	3.41114	5.03453	-9999
2006	249	63600	64200	63900	15	8.14	-61.23	-60.79	-60.01	1.22	4.53017	8.9942	-9999
2006	249	64200	64800	64500	15.9	7.95	-61.21	-60.79	-60	1.21	3.88328	3.82364	-9999
2006	249	64800	65400	65100	15.3	8.23	-61.12	-60.69	-59.92	1.2	-5.29878	-9999	-9999
2006	249	65400	66000	65700	17.4	8.14	-61.1	-60.6	-59.7	1.4	6.00802	11.1482	52.207
2006	249	66000	66600	66300	17.9	8.12	-61.06	-60.57	-59.64	1.42	7.84527	2.48017	51.9315
2006	249	66600	67200	66900	17.7	8.16	-60.97	-60.47	-59.65	1.32	1.04522	13.9914	50.1653
2006	249	67200	67800	67500	17	8.68	-60.94	-60.43	-59.63	1.31	2.08623	2.4962	49.3394
2006	249	67800	68400	68100	15.9	8.72	-61.07	-60.53	-59.62	1.45	-1.39954	16.1173	49.8647
2006	249	68400	69000	68700	18.8	7.98	-61.15	-60.59	-59.53	1.62	0.672251	17.1246	49.5714
2006	249	69000	69600	69300	21.1	7.64	-61.19	-60.66	-59.75	1.44	3.50571	13.2037	54.8955
2006	249	69600	70200	69900	21.5	6.9	-61.29	-60.83	-60.18	1.11	5.13624	-8.60961	52.9574
2006	249	70200	70800	70500	26.6	6.65	-61.17	-60.74	-60.15	1.02	5.33949	1.40524	54.0918
2006	249	70800	71400	71100	24	7	-61.16	-60.73	-60.14	1.02	1.11397	9.91478	51.5136
2006	249	71400	72000	71700	21.5	7.93	-60.76	-60.25	-59.42	1.34	0.0326564	11.4102	50.7223
2006	249	72000	72600	72300	22.5	7.28	-60.8	-60.2	-59.42	1.38	4.40325	19.0747	48.5245
2006	249	72600	73200	72900	23.7	7.08	-60.78	-60.19	-59.36	1.42	3.95519	3.20785	51.5643
2006	249	73200	73800	73500	25	7.49	-60.41	-59.77	-58.78	1.63	2.40628	5.59351	51.063
2006	249	73800	74400	74100	26.7	7.46	-60.15	-59.43	-58.5	1.65	-0.665702	10.9087	48.2686
2006	249	74400	75000	74700	27.4	7.35	-60.05	-59.34	-58.57	1.48	4.35067	-0.979069	50.3625
2006	249	75000	75600	75300	26.6	7.67	-60.11	-59.41	-58.51	1.6	3.23507	5.97276	49.4032
2006	249	75600	76200	75900	28.7	7.87	-60.05	-59.37	-58.38	1.67	4.63218	13.9206	50.9796
2006	249	76200	76800	76500	28.1	7.27	-60.19	-59.54	-58.71	1.48	2.82262	13.9611	52.01
2006	249	76800	77400	77100	27	7.14	-60.25	-59.65	-58.88	1.37	4.83529	6.20582	48.0974
2006	249	77400	78000	77700	22.2	8.06	-60.03	-59.44	-58.61	1.42	4.18825	11.2612	49.3414
2006	249	78000	78600	78300	21.6	8.41	-59.8	-59.2	-58.4	1.4	3.01263	11.7842	49.557
2006	249	78600	79200	78900	20.9	8.51	-59.83	-59.26	-58.41	1.42	1.00793	13.687	47.8976
2006	249	79200	79800	79500	18.9	9.2	-59.44	-58.9	-58.12	1.32	5.18918	3.8126	49.6696
2006	249	79800	80400	80100	19.1	8.87	-59.67	-59.15	-58.41	1.26	3.81916	11.6857	51.7658
2006	249	80400	81000	80700	20.5	8.03	-59.82	-59.29	-58.49	1.33	3.59284	14.5556	49.4352
2006	249	81000	81600	81300	28.2	6.6	-59.9	-59.43	-58.81	1.09	3.01011	-0.719679	53.1221
2006	249	81600	82200	81900	33.7	6.41	-60.05	-59.61	-59.08	0.97	3.2568	0.324624	48.3761
2006	249	82200	82800	82500	30.3	7.06	-59.95	-59.49	-58.81	1.14	1.65154	7.43038	49.8039
2006	249	82800	83400	83100	27.1	7.66	-59.83	-59.3	-58.4	1.43	6.45183	9.26304	51.9483
2006	249	83400	84000	83700	26.2	7.96	-59.79	-59.21	-58.35	1.44	0.93648	16.9098	51.831
2006	249	84000	84600	84300	22	8.55	-59.72	-59.13	-58.17	1.55	5.30031	2.38944	49.7585
2006	249	84600	85200	84900	20.2	8.13	-59.86	-59.2	-58.21	1.65	4.02904	17.1842	50.5976
2006	249	85200	85800	85500	18.1	8.2	-59.91	-59.35	-58.4	1.51	4.50611	11.9375	50.3601
2006	249	85800.1	86400	86100	16.4999	8.72004	-59.67	-59.1	-58.14	1.53001	5.42722	2.76049	52.4342
2006	250	0	600	300	16	8.72	-59.7	-59.04	-58.03	1.67	-3.92455	12.1714	50.4376
2006	250	600	1200	900	16.9	7.84	-59.86	-59.15	-58.12	1.74	-9999	-9999	51.8085
2006	250	1200	1800	1500	19.2	7.41	-59.93	-59.22	-58.25	1.68	6.29334	8.11167	50.8491
2006	250	1800	2400	2100	20.3	7.76	-59.93	-59.19	-58.05	1.88	3.65169	8.77783	49.1309
2006	250	2400	3000	2700	19.1	8.49	-59.8	-59.06	-57.7	2.1	1.49858	2.77651	48.7716
2006	250	3000	3600	3300	19.3	8.77	-59.73	-58.83	-57.18	2.55	0.905069	3.33983	49.3839
2006	250	3600	4200	3900	21.7	7.61	-59.69	-58.79	-57.46	2.23	6.966	1.55375	50.2988
2006	250	4200	4800	4500	25.7	8.06	-59.39	-58.59	-57.46	1.93	4.29925	-1.95696	49.876
2006	250	4800	5400	5100	26	8.48	-59.21	-58.43	-57.42	1.79	2.72448	5.63673	50.0682
2006	250	5400	6000	5700	24.6	9.36	-58.84	-58.09	-56.91	1.93	1.79956	25.7225	48.6927
2006	250	6000	6600	6300	24.8571	10.1286	-58.8	-58.014	-56.7	2.1	1.62378	12.6384	48.9913
2006	250	6600	7200	6900	25	9.05	-58.57	-57.83	-56.65	1.92	4.74551	5.65059	48.3149
2006	250	7200	7800	7500	24.6	8.49	-58.59	-57.84	-56.79	1.8	2.21575	13.184	51.0653
2006	250	7800	8400	8100	23.1111	8.97778	-58.5444	-57.7	-56.3778	2.16667	1.16408	16.7717	49.5839
2006	250	8400	9000	8700	21.7	9.33	-58.7	-57.89	-56.47	2.23	1.79705	9.41306	50.3941
2006	250	9000	9600	9300	19.3	9.46	-58.53	-57.74	-56.44	2.09	0.878618	8.6847	50.7492
2006	250	9600	10200	9900	19.1	9.31	-58.38	-57.56	-56.29	2.09	5.52184	2.06682	52.0763
2006	250	10200	10800	10500	19.9	9.47	-58.08	-57.26	-55.99	2.09	2.28897	6.95743	46.6722
2006	250	10800	11400	11100	22.5	9.24	-58.03	-57.09	-55.78	2.25	3.57882	9.22364	47.2529
2006	250	11400	12000	11700	25.3	8.65	-58.16	-57.26	-55.96	2.2	2.05654	11.8941	48.5618
2006	250	12000	12600	12300	27.1	8.18	-58.45	-57.51	-56.32	2.13	1.35039	13.2925	51.5662
2006	250	12600	13200	12900	26.2	8.07	-58.31	-57.45	-56.37	1.94	2.82612	-0.452422	48.8827
2006	250	13200	13800	13500	27.2	8.12	-58.26	-57.43	-56.37	1.89	3.92392	12.7924	48.3477
2006	250	13800	14400	14100	25.7	7.76	-58.42	-57.58	-56.55	1.87	-5.02708	-7.86136	47.4874
2006	250	14400	15000	14700	23.7	7.93	-58.3	-57.53	-56.49	1.81	-9999	-9999	-9999
2006	250	15000	15600	15300	25.1429	8.4	-58	-57.314	-56.3571	1.64286	-9999	-9999	-9999
2006	250	15600	16200	15900	24.8	8.77	-57.92	-57.23	-56.23	1.69	6.06532	-9999	-9999
2006	250	16200	16800	16500	26.5	8.94	-57.95	-57.09	-55.81	2.14	2.43492	14.8801	-9999
2006	250	16800	17400	17100	30.6	8.73	-57.7	-56.85	-55.67	2.03	1.16063	18.0564	-9999
2006	250	17400	18000	17700	36	8.37	-57.87	-57	-55.97	1.9	11.5614	-0.283188	-9999
2006	250	18000	18600	18300	42.9	7.76	-58.07	-57.05	-55.95	2.12	1.63052	-9999	44.0699
2006	250	18600	19200	18900	47.7	6.28	-59.22	-57.95	-56.76	2.46	2.94254	11.0952	50.5569
2006	250	19200	19800	19500	55.4	6.11	-61.13	-59.29	-57.48	3.65	1.73618	8.56808	49.7978
2006	250	19800	20400	20100	44.6667	7.04444	-60.3222	-58.544	-56.6111	3.71111	3.2195	7.7638	48.5578
2006	250	20400	21000	20700	43.375	6.3	-60.825	-58.55	-56.6625	4.1625	2.80061	7.13007	47.66
2006	250	21000	21600	21300	40	8	-58.21	-57.19	-55.92	2.29	3.466	10.9338	49.5026
2006	250	21600	22200	21900	38.2	8.05	-58.13	-57.13	-55.78	2.35	1.496	10.7512	52.0737
2006	250	22200	22800	22500	42.3	7.4	-58.32	-57.14	-55.82	2.5	3.45288	20.4922	49.1679
2006	250	22800	23400	23100	41	7.13	-58.56	-57.27	-55.81	2.75	5.69156	11.4502	50.8647
2006	250	23400	24000	23700	31.6	8.4	-57.51	-56.45	-55.07	2.44	1.61769	10.4293	51.2005
2006	250	24000	24600	24300	26.7	8.75	-57.08	-56.11	-54.98	2.1	4.20196	7.613	47.7971
2006	250	24600	25200	24900	26	8.91	-56.77	-55.8	-54.71	2.06	2.59304	6.83537	49.2353
2006	250	25200	25800	25500	26	9.16	-56.76	-55.92	-54.9	1.86	5.64521	9.77012	48.936
2006	250	25800	26400	26100	25.1	9.68	-56.44	-55.64	-54.65	1.79	5.0321	2.51562	48.2323
2006	250	26400	27000	26700	26.6	9.59	-56.39	-55.63	-54.67	1.72	2.20588	6.84917	46.9431
2006	250	27000	27600	27300	28.1	9.89	-56.31	-55.52	-54.49	1.82	3.38351	14.7211	46.9032
2006	250	27600	28200	27900	28.1	9.99	-56.03	-55.24	-54.18	1.85	5.09578	14.8367	48.852
2006	250	28200	28800	28500	27.6	10	-55.73	-54.95	-53.9	1.83	0.848539	7.9755	46.6136
2006	250	28800	29400	29100	28.5	10.14	-55.7	-54.85	-53.77	1.93	3.64783	9.49764	45.4966
2006	250	29400	30000	29700	28.4	9.54	-55.86	-55.04	-54.05	1.81	6.6331	2.16061	46.9387
2006	250	30000	30600	30300	31.3	9.34	-56.09	-55.31	-54.29	1.8	2.49693	11.8069	45.4393
2006	250	30600	31200	30900	33.4	8.86	-56.48	-55.61	-54.46	2.02	0.482746	14.3619	43.7788
2006	250	31200	31800	31500	34.1	8.42	-56.73	-55.86	-54.71	2.02	4.38192	2.00704	43.7251
2006	250	31800	32400	32100	40	7.43	-57.29	-56.3	-55.27	2.02	6.15729	3.66619	46.4979
2006	250	32400	33000	32700	42.9	7.22	-57.52	-56.56	-55.52	2	3.40523	4.07832	47.6104
2006	250	33000	33600	33300	42.8	8.59	-57.13	-56.25	-55	2.13	4.46837	5.41532	46.3037
2006	250	33600	34200	33900	42.7	8.42	-57.17	-56.32	-55.15	2.02	2.31016	16.0523	46.072
2006	250	34200	34800	34500	39.2	8.7	-56.71	-55.95	-54.88	1.83	6.65983	6.76067	45.3758
2006	250	34800	35400	35100	40	8.89	-56.51	-55.77	-54.61	1.9	2.46189	1.74502	45.4516
2006	250	35400	36000	35700	40	9.19	-56.4	-55.69	-54.6	1.8	2.00898	-0.167217	48.0656
2006	250	36000	36600	36300	44.9	8.94	-56.46	-55.67	-54.66	1.8	1.40464	2.64587	46.8186
2006	250	36600	37200	36900	46.4	8.95	-56.48	-55.7	-54.67	1.81	2.26207	12.2066	45.9232
2006	250	37200	37800	37500	41.7	9.14	-56.5	-55.75	-54.71	1.79	3.68739	4.88473	48.0118
2006	250	37800	38400	38100	41	8.68	-56.43	-55.71	-54.68	1.75	1.25787	3.88969	47.52
2006	250	38400	39000	38700	45.4	8.32	-56.66	-55.85	-54.86	1.8	1.284	13.3007	47.9471
2006	250	39000	39600	39300	47	8.27143	-56.8429	-55.886	-54.7857	2.05714	2.90378	15.3096	47.7697
2006	250	39600	40200	39900	52.2	6.49	-58.3	-56.75	-55.4	2.9	2.2622	10.6217	49.3843
2006	250	40200	40800	40500	51.7	5.61	-59.93	-57.69	-55.71	4.22	5.92962	-0.156544	48.777
2006	250	40800	41400	41100	48	6.74	-58.16	-56.73	-55.2	2.96	2.50726	6.94781	50.9574
2006	250	41400	42000	41700	43.3	7.35	-57.33	-56.12	-54.72	2.61	3.00638	2.4399	47.876
2006	250	42000	42600	42300	40.3	8.03	-56.61	-55.5	-54.26	2.35	1.99815	2.97851	48.2496
2006	250	42600	43200	42900	37.2	9.63	-56.01	-55.03	-53.85	2.16	3.37714	1.20598	50.3265
2006	250	43200	43800	43500	38.2	9.4	-56.33	-55.34	-54.09	2.24	3.33089	-0.309224	49.7829
2006	250	43800	44400	44100	40.4	9.21	-56.96	-55.89	-54.43	2.53	0.103529	14.4082	52.9931
2006	250	44400	45000	44700	41.4	8.4	-57.16	-56.12	-54.82	2.34	1.03241	7.49792	48.011
2006	250	45000	45600	45300	41.1	7.89	-57.57	-56.47	-55.21	2.36	2.86079	8.39375	50.4417
2006	250	45600	46200	45900	39.6	7.85	-57.5	-56.43	-55.28	2.22	4.94869	0.647005	51.1735
2006	250	46200	46800	46500	37.8	8.15	-57.3	-56.27	-55.01	2.29	4.33325	-1.37271	48.774
2006	250	46800	47400	47100	37.5	8.05	-57.15	-56.08	-54.96	2.19	4.58698	3.1543	53.0991
2006	250	47400	48000	47700	34.5	8.26	-56.76	-55.81	-54.83	1.93	4.2887	7.84241	51.1689
2006	250	48000	48600	48300	34	8.83	-56.37	-55.52	-54.56	1.81	3.13885	17.2955	51.9457
2006	250	48600	49200	48900	32.7778	9.46667	-56.2111	-55.311	-54.3778	1.83333	4.73092	5.26157	51.4211
2006	250	49200	49800	49500	30.5	9.325	-55.825	-54.963	-54.125	1.7	5.13673	8.54606	49.3824
2006	250	49800	50400	50100	26.2	7.91	-56.31	-55.37	-54.5	1.81	3.48187	5.4006	47.4033
2006	250	50400	51000	50700	29.5	7.83	-56.49	-55.46	-54.5	1.99	5.02063	1.99072	50.5822
2006	250	51000	51600	51300	30.6667	7.81667	-56.6667	-55.683	-54.7833	1.88333	0.462325	0.55539	50.0203
2006	250	51600	52200	51900	31.3	7.97	-56.86	-55.85	-54.85	2.01	2.25218	5.8364	51.317
2006	250	52200	52800	52500	32.1	6.94	-57.03	-55.96	-55.04	1.99	3.29467	11.8485	49.618
2006	250	52800	53400	53100	32.7	6.86	-56.95	-56.05	-55.25	1.7	1.20893	12.4631	46.7874
2006	250	53400	54000	53700	31	8.8	-56.63	-55.81	-54.87	1.76	-3.41944	-1.264	50.0944
2006	250	54000	54600	54300	29.2	9.53	-56.47	-55.64	-54.61	1.86	-9999	-9999	-9999
2006	250	54600	55200	54900	31.5	10.19	-56.39	-55.49	-54.35	2.04	-9999	-9999	-9999
2006	250	55200	55800	55500	35.4	9.99	-56.59	-55.58	-54.31	2.28	1.39007	-9999	-9999
2006	250	55800	56400	56100	33.7	9.47	-56.69	-55.82	-54.63	2.06	4.83998	13.7772	-9999
2006	250	56400	57000	56700	32.9	9.43	-56.73	-55.82	-54.63	2.1	2.8521	14.4208	-9999
2006	250	57000	57600	57300	35	8.65	-56.91	-55.93	-54.75	2.16	-2.87066	17.6145	-9999
2006	250	57600	58200	57900	36	8.77	-57.01	-56.08	-54.88	2.13	1.98644	-9999	49.7204
2006	250	58200	58800	58500	37.4	8.73	-56.78	-55.88	-54.8	1.98	3.27344	8.89091	50.2869
2006	250	58800	59400	59100	37	8.45	-56.49	-55.66	-54.64	1.85	2.57352	8.58424	49.1733
2006	250	59400	60000	59700	36.3	8.97	-56.29	-55.42	-54.46	1.83	3.4973	14.4168	49.7358
2006	250	60000	60600	60300	35.1	9.17	-55.97	-55.07	-54.09	1.88	5.05895	7.58396	50.5924
2006	250	60600	61200	60900	35.3	8.62	-56.03	-55.12	-54.25	1.78	3.06533	7.27362	48.9074
2006	250	61200	61800	61500	34.5	9.32	-56.04	-55.08	-54.14	1.9	1.63836	11.6031	49.6629
2006	250	61800	62400	62100	35.1	8.56	-56.46	-55.48	-54.48	1.98	2.91331	1.66852	47.005
2006	250	62400	63000	62700	36.7	8.23	-56.71	-55.79	-54.79	1.92	2.81645	-0.355909	46.8637
2006	250	63000	63600	63300	38	7.6	-56.97	-56.1	-55.09	1.88	2.49038	6.21564	45.3129
2006	250	63600	64200	63900	36.2	7.13	-57.2	-56.22	-55.22	1.98	3.31291	5.55884	49.3539
2006	250	64200	64800	64500	33.8	6.53	-57.13	-56.16	-55.33	1.8	4.85024	8.81854	46.803
2006	250	64800	65400	65100	36	6.58	-57.34	-56.37	-55.48	1.86	3.03124	-1.05211	46.5822
2006	250	65400	66000	65700	36	5.88	-57.43	-56.5	-55.75	1.68	3.89696	7.74857	46.2377
2006	250	66000	66600	66300	35.6	7.12	-57.58	-56.53	-55.72	1.86	3.72543	5.19932	45.9177
2006	250	66600	67200	66900	32.7	8.5	-57.33	-56.42	-55.51	1.82	3.01683	7.78469	46.2456
2006	250	67200	67800	67500	27.1	8.23	-57.12	-56.34	-55.5	1.62	6.72409	2.27093	48.6577
2006	250	67800	68400	68100	33.3	7.45	-57.38	-56.58	-55.76	1.62	5.81427	2.12103	47.6948
2006	250	68400	69000	68700	39.8	7.07	-57.6	-56.85	-56.11	1.49	5.74134	3.01606	45.932
2006	250	69000	69600	69300	45.2	7.47	-57.9	-57.14	-56.35	1.55	3.17949	9.97201	45.3963
2006	250	69600	70200	69900	49.7	6.79	-58.03	-57.34	-56.61	1.42	4.08689	12.6229	47.7422
2006	250	70200	70800	70500	51.8	7.23	-58.49	-57.7	-56.86	1.63	2.11748	8.46784	47.1079
2006	250	70800	71400	71100	46.2	7.6	-58.61	-57.84	-56.94	1.67	3.63882	6.85623	47.1865
2006	250	71400	72000	71700	40.2	8.28	-58.41	-57.72	-56.91	1.5	3.05012	1.4707	47.4564
2006	250	72000	72600	72300	39.7	9.21	-58.11	-57.46	-56.69	1.42	2.32197	8.09997	47.8092
2006	250	72600	73200	72900	38	8.91	-58.2	-57.58	-56.85	1.35	2.2474	4.74388	46.4729
2006	250	73200	73800	73500	36.7	8.82	-58.21	-57.62	-56.97	1.24	2.99336	8.10353	47.945
2006	250	73800	74400	74100	38.7	9.07	-58.24	-57.7	-57.06	1.18	2.39052	1.93732	48.4129
2006	250	74400	75000	74700	33.9	8.35	-58.21	-57.72	-57.17	1.04	3.71116	9.58301	47.4593
2006	250	75000	75600	75300	30	8.39	-58.23	-57.78	-57.27	0.96	2.03482	7.24318	46.7712
2006	250	75600	76200	75900	30.9	8.57	-58.4	-57.92	-57.44	0.96	0.429032	6.0516	46.9408
2006	250	76200	76800	76500	31.2	8.48	-58.62	-58.16	-57.72	0.9	3.75787	10.9724	47.4327
2006	250	76800	77400	77100	33.9	8.81	-58.63	-58.29	-57.8	0.83	5.56826	1.56065	46.9639
2006	250	77400	78000	77700	29.3	7.83	-58.63	-58.3	-57.86	0.77	3.85476	6.70219	46.4595
2006	250	78000	78600	78300	28.5	8.08	-58.76	-58.37	-57.99	0.77	1.37944	11.6564	47.1432
2006	250	78600	79200	78900	25.7	8.3	-58.79	-58.44	-58	0.79	1.92206	6.73268	48.5444
2006	250	79200	79800	79500	27	8.33	-58.8	-58.47	-58	0.8	3.31928	9.50908	46.5033
2006	250	79800	80400	80100	31.3	9.38	-58.76	-58.42	-57.99	0.77	1.04254	5.61337	48.3188
2006	250	80400	81000	80700	26.6	9.1	-58.69	-58.37	-57.94	0.75	5.51081	4.83247	44.2255
2006	250	81000	81600	81300	31.1	8.35	-58.72	-58.42	-58.05	0.67	5.25618	7.6968	44.6138
2006	250	81600	82200	81900	32.3	7.18	-58.74	-58.5	-58.17	0.57	3.34993	2.00218	44.1372
2006	250	82200	82800	82500	35	7.03	-58.87	-58.6	-58.31	0.56	2.73488	7.84751	45.2808
2006	250	82800	83400	83100	33.8	7.12	-58.93	-58.68	-58.41	0.52	3.29552	7.25241	46.1986
2006	250	83400	84000	83700	29.5	7.54	-59.05	-58.79	-58.5	0.55	1.57514	13.8124	46.9865
2006	250	84000	84600	84300	31.6	7.9	-59.03	-58.78	-58.45	0.58	3.19809	0.685372	46.8738
2006	250	84600	85200	84900	31.3	7.47	-59.23	-58.92	-58.62	0.61	2.37345	2.63358	44.8215
2006	250	85200	85800	85500	27.8	7.8	-59.48	-59.18	-58.86	0.62	3.19665	2.6236	45.3211
2006	250	85800.1	86400	86100	22.2995	7.22994	-59.76	-59.45	-59.14	0.619987	2.93118	-5.67756	42.9519
2006	251	0	600	300	24.3333	6.43333	-60	-59.7	-59.4	0.6	1.77819	2.35774	44.6583
2006	251	600	1200	900	34.4	6.87	-60.2	-59.89	-59.58	0.62	-9999	-9999	46.7604
2006	251	1200	1800	1500	35.3	7.05	-60.27	-60	-59.73	0.54	2.05701	9.07974	45.5922
2006	251	1800	2400	2100	28.1	6.56	-60.45	-60.2	-59.91	0.54	1.35535	5.98707	46.443
2006	251	2400	3000	2700	28.6	6.09	-60.65	-60.4	-60.16	0.49	5.62073	1.7353	48.4777
2006	251	3000	3600	3300	27.8	6.65	-60.76	-60.55	-60.28	0.48	4.35366	2.2694	45.7488
2006	251	3600	4200	3900	29	7.17	-60.82	-60.65	-60.38	0.44	2.44751	3.51289	47.4076
2006	251	4200	4800	4500	19.3	7.56	-60.77	-60.61	-60.3	0.47	1.73554	6.07152	43.7297
2006	251	4800	5400	5100	10.6	8.42	-60.7	-60.51	-60.12	0.58	1.15134	8.9923	43.0459
2006	251	5400	6000	5700	7.6	8.62	-60.64	-60.5	-60.1	0.54	3.67583	2.65969	45.1794
2006	251	6000	6600	6300	11.9	8.75	-60.6	-60.43	-60.1	0.5	2.9356	4.63737	44.5141
2006	251	6600	7200	6900	15.9	7.64	-60.42	-60.35	-60.06	0.36	-0.592347	10.5477	46.2347
2006	251	7200	7800	7500	19.4	6.62	-60.23	-60.19	-60	0.23	-9999	-9999	-9999
2006	251	7800	8400	8100	21.4	6.53	-60.2	-60.18	-60	0.2	-9999	-9999	-9999
2006	251	8400	9000	8700	19.9	6.37	-60.2	-60.2	-60.08	0.12	3.54722	-9999	-9999
2006	251	9000	9600	9300	19.2	7.44	-60.09	-60.11	-59.99	0.1	3.20198	6.94098	-9999
2006	251	9600	10200	9900	19	6.96	-59.95	-60.01	-59.89	0.06	3.84818	8.20063	-9999
2006	251	10200	10800	10500	21.6	6.81	-59.79	-59.91	-59.79	0	-0.860834	8.67793	-9999
2006	251	10800	11400	11100	14.3	7.64	-59.68	-59.79	-59.7	-0.02	1.59095	-9999	50.6547
2006	251	11400	12000	11700	9.2	8.11	-59.5	-59.63	-59.55	-0.05	-1.2328	4.2013	48.1424
2006	251	12000	12600	12300	8.2	8.1	-59.33	-59.45	-59.4	-0.07	2.10944	4.72154	48.5327
2006	251	12600	13200	12900	9.5	7.65	-59.27	-59.4	-59.33	-0.06	0.828041	10.6967	47.1005
2006	251	13200	13800	13500	8.9	7.68	-59.2	-59.37	-59.3	-0.1	1.53747	3.36854	47.1014
2006	251	13800	14400	14100	8.4	8.38	-59.11	-59.29	-59.22	-0.11	2.85873	3.30959	46.4778
2006	251	14400	15000	14700	8.4	8.71	-59	-59.19	-59.13	-0.13	3.69297	3.40054	45.3156
2006	251	15000	15600	15300	5	8.35	-58.91	-59.06	-59.02	-0.11	3.89579	0.851352	45.8878
2006	251	15600	16200	15900	5.3	8.89	-58.81	-58.98	-58.93	-0.12	3.25372	6.43432	46.1281
2006	251	16200	16800	16500	6.1	9.57	-58.76	-58.91	-58.86	-0.1	4.39809	8.26727	44.3113
2006	251	16800	17400	17100	7	9.85	-58.65	-58.79	-58.75	-0.1	2.18158	10.7124	44.039
2006	251	17400	18000	17700	5.3	9.71	-58.5	-58.67	-58.61	-0.11	3.70515	10.8263	43.4466
2006	251	18000	18600	18300	2.2	9.92	-58.4	-58.6	-58.51	-0.11	4.34932	5.54994	41.3784
2006	251	18600	19200	18900	1.7	9.47	-58.4	-58.51	-58.48	-0.08	5.61321	-2.40169	39.5725
2006	251	19200	19800	19500	3.3	9.04	-58.34	-58.5	-58.41	-0.07	2.43387	9.63744	-9999
2006	251	19800	20400	20100	3.1	8.88	-58.32	-58.45	-58.4	-0.08	1.94341	4.22492	42.1352
2006	251	20400	21000	20700	3.6	9.16	-58.3	-58.42	-58.4	-0.1	5.54418	6.53391	43.4162
2006	251	21000	21600	21300	4	9.38	-58.26	-58.4	-58.37	-0.11	3.37933	2.05006	44.1683
2006	251	21600	22200	21900	2.9	9.49	-58.27	-58.4	-58.37	-0.1	4.33889	7.02926	42.548
2006	251	22200	22800	22500	3.5	9.49	-58.2	-58.36	-58.3	-0.1	4.61111	7.83563	42.2291
2006	251	22800	23400	23100	2.9	9.4	-58.09	-58.26	-58.2	-0.11	2.57214	6.34092	40.304
2006	251	23400	24000	23700	3.2	9.66	-58	-58.11	-58.08	-0.08	2.92394	6.09788	39.4034
2006	251	24000	24600	24300	0.3	9.52	-57.99	-58.1	-58	-0.01	3.28441	5.58611	40.8488
2006	251	24600	25200	24900	0.6	9.56	-58	-58.1	-58	0	3.94209	2.99752	42.1182
2006	251	25200	25800	25500	1.7	9.43	-57.98	-58.1	-58	-0.02	2.34513	8.05343	40.9478
2006	251	25800	26400	26100	359.3	9.12	-57.9	-58.05	-58	-0.1	1.51084	7.5621	41.1914
2006	251	26400	27000	26700	3.1	9.43	-57.9	-58.01	-57.99	-0.09	2.64437	4.7668	43.262
2006	251	27000	27600	27300	2.4	9.16	-57.9	-58	-57.93	-0.03	3.52236	3.30051	42.1902
2006	251	27600	28200	27900	359.8	9.2	-57.88	-57.96	-57.89	-0.01	3.43158	2.71188	43.6881
2006	251	28200	28800	28500	359.7	9.15	-57.87	-57.93	-57.85	0.02	0.811845	4.73151	42.2481
2006	251	28800	29400	29100	0.1	9.45	-57.85	-57.9	-57.8	0.05	2.99928	10.0137	44.7617
2006	251	29400	30000	29700	359.8	9.21	-57.79	-57.88	-57.78	0.01	2.48271	11.7403	42.2849
2006	251	30000	30600	30300	1.2	9.57	-57.67	-57.8	-57.69	-0.02	2.01475	4.04001	43.1395
2006	251	30600	31200	30900	1	8.87	-57.59	-57.7	-57.59	0	3.29548	6.58348	44.395
2006	251	31200	31800	31500	2.6	9.21	-57.48	-57.6	-57.49	-0.01	4.49159	5.75877	45.352
2006	251	31800	32400	32100	0.2	8.94	-57.46	-57.54	-57.47	-0.01	-0.598501	10.6635	45.8517
2006	251	32400	33000	32700	1.8	9.28	-57.4	-57.52	-57.4	0	1.86859	2.68741	46.1544
2006	251	33000	33600	33300	1.1	9.75	-57.31	-57.4	-57.32	-0.01	2.76381	6.45032	47.1775
2006	251	33600	34200	33900	1.2	9.53	-57.16	-57.31	-57.18	-0.02	0.269678	9.75955	42.2967
2006	251	34200	34800	34500	2.4	8.87	-57.1	-57.23	-57.11	-0.01	4.37656	2.96863	43.9732
2006	251	34800	35400	35100	0.9	9.08	-57	-57.13	-57.05	-0.05	2.70044	9.71485	42.1146
2006	251	35400	36000	35700	1.5	9.05	-56.82	-56.96	-56.86	-0.04	3.77892	7.23063	43.6528
2006	251	36000	36600	36300	0.6	9.04	-56.76	-56.9	-56.79	-0.03	4.30481	1.97231	43.9623
2006	251	36600	37200	36900	2.1	8.83	-56.7	-56.82	-56.72	-0.02	2.61669	-1.46357	45.4705
2006	251	37200	37800	37500	359.2	8.34	-56.64	-56.81	-56.7	-0.06	1.35254	5.05274	44.4167
2006	251	37800	38400	38100	359.1	8.51	-56.6	-56.76	-56.64	-0.04	0.318406	-0.27227	45.4161
2006	251	38400	39000	38700	359.7	8.57	-56.55	-56.68	-56.6	-0.05	3.20429	-1.35409	41.6355
2006	251	39000	39600	39300	358.5	7.89	-56.5	-56.62	-56.58	-0.08	1.76378	-7.60404	43.7275
2006	251	39600	40200	39900	2.1	7.25	-56.43	-56.54	-56.41	0.02	2.4737	6.72221	44.3589
2006	251	40200	40800	40500	1.2	7.22	-56.4	-56.5	-56.43	-0.03	1.84405	7.13351	44.5884
2006	251	40800	41400	41100	2.6	7.03	-56.37	-56.47	-56.37	0	2.53735	7.37049	43.9067
2006	251	41400	42000	41700	8.34057e-17	7.08	-56.24	-56.33	-56.22	0.02	2.83037	3.26688	47.3537
2006	251	42000	42600	42300	5.4	7.26	-56.2	-56.28	-56.19	0.01	3.76912	3.69405	46.0427
2006	251	42600	43200	42900	8.8	7.33	-56.15	-56.21	-56.1	0.05	2.23191	-4.36695	45.4403
2006	251	43200	43800	43500	7.5	7.74	-56.05	-56.15	-56	0.05	0.809045	9.88225	42.9128
2006	251	43800	44400	44100	2.2	8.42	-56	-56.07	-55.94	0.06	3.27899	3.72652	45.6705
2006	251	44400	45000	44700	0.9	8.02	-55.93	-55.94	-55.78	0.15	2.79873	14.345	44.8243
2006	251	45000	45600	45300	0.3	8.71	-55.89	-55.94	-55.83	0.06	1.98873	8.88915	45.5495
2006	251	45600	46200	45900	0.2	8.78	-55.8	-55.86	-55.67	0.13	2.16985	3.15051	46.2564
2006	251	46200	46800	46500	2.6	8.24	-55.77	-55.84	-55.73	0.04	4.03836	5.5035	45.1234
2006	251	46800	47400	47100	0.8	7.42	-55.7	-55.8	-55.67	0.03	-9999	-9999	-9999
2006	251	47400	48000	47700	1.2	7.38	-55.67	-55.75	-55.65	0.02	-9999	-9999	-9999
2006	251	48000	48600	48300	0.6	7.67	-55.7	-55.76	-55.66	0.04	0.0704824	-9999	-9999
2006	251	48600	49200	48900	357.7	8.05	-55.7	-55.75	-55.58	0.12	3.29237	14.3834	-9999
2006	251	49200	49800	49500	357.6	8.06	-55.7	-55.77	-55.6	0.1	4.45667	9.72798	-9999
2006	251	49800	50400	50100	354.9	8.49	-55.72	-55.75	-55.59	0.13	4.69112	1.79928	-9999
2006	251	50400	51000	50700	357.4	8.69	-55.75	-55.75	-55.5	0.25	2.9138	-9999	44.6013
2006	251	51000	51600	51300	359.3	8.26	-55.74	-55.71	-55.42	0.32	2.10018	2.89384	48.6133
2006	251	51600	52200	51900	1.3	8.28	-55.82	-55.77	-55.52	0.3	3.91289	2.27214	48.6202
2006	251	52200	52800	52500	6.8	7.72	-55.89	-55.88	-55.67	0.22	4.46482	6.12234	49.3011
2006	251	52800	53400	53100	6.4	7.87	-55.87	-55.9	-55.72	0.15	2.33436	8.87476	48.0417
2006	251	53400	54000	53700	3.5	8.83	-55.84	-55.84	-55.65	0.19	2.36675	7.54322	47.2498
2006	251	54000	54600	54300	2.5	9.07	-55.82	-55.82	-55.6	0.22	3.09249	10.9892	47.5381
2006	251	54600	55200	54900	1.7	9.34	-55.92	-55.85	-55.66	0.26	1.36438	7.90306	46.4573
2006	251	55200	55800	55500	0.4	9.59	-55.95	-55.9	-55.7	0.25	2.98565	0.650524	47.4691
2006	251	55800	56400	56100	1.1	9.84	-55.99	-55.97	-55.7	0.29	2.39404	-0.273355	48.4518
2006	251	56400	57000	56700	359.7	9.91	-55.93	-55.92	-55.71	0.22	4.35241	2.71252	48.1361
2006	251	57000	57600	57300	359	9.4	-55.89	-55.92	-55.69	0.2	2.10426	4.5621	48.3605
2006	251	57600	58200	57900	0.5	9.24	-55.79	-55.84	-55.6	0.19	1.71785	9.33554	45.2816
2006	251	58200	58800	58500	1	8.91	-55.71	-55.77	-55.6	0.11	2.94569	0.935657	46.911
2006	251	58800	59400	59100	1.6	8.8	-55.7	-55.76	-55.52	0.18	3.38311	-2.26485	46.6561
2006	251	59400	60000	59700	1	9.05	-55.59	-55.65	-55.48	0.11	4.16439	2.36932	47.2111
2006	251	60000	60600	60300	0.5	9.36	-55.52	-55.59	-55.4	0.12	2.76735	9.31298	47.2324
2006	251	60600	61200	60900	0.1	8.91	-55.48	-55.5	-55.36	0.12	3.79477	4.58851	48.4676
2006	251	61200	61800	61500	1.2	9.3	-55.4	-55.46	-55.3	0.1	2.94203	6.82924	46.0697
2006	251	61800	62400	62100	0.9	9.4	-55.28	-55.37	-55.2	0.08	2.17009	6.21872	46.9476
2006	251	62400	63000	62700	359	9.6	-55.21	-55.3	-55.15	0.06	2.90065	9.06403	47.4195
2006	251	63000	63600	63300	0.5	8.96	-55.2	-55.28	-55.1	0.1	3.73159	2.65007	47.1244
2006	251	63600	64200	63900	0	9.04	-55.14	-55.2	-55	0.14	1.77244	2.59606	48.4667
2006	251	64200	64800	64500	358.4	9.25	-55.11	-55.13	-54.91	0.2	2.68989	8.23933	45.4139
2006	251	64800	65400	65100	2	9.32	-55.04	-55.03	-54.81	0.23	4.41932	-0.172518	46.8721
2006	251	65400	66000	65700	3.8	9.23	-54.99	-55	-54.8	0.19	1.75949	5.10279	49.5234
2006	251	66000	66600	66300	2.6	9.04	-54.98	-54.97	-54.74	0.24	3.53586	3.51396	48.8652
2006	251	66600	67200	66900	1.8	9.57	-54.9	-54.9	-54.7	0.2	0.802131	7.62048	48.9483
2006	251	67200	67800	67500	359.8	9.79	-54.8	-54.83	-54.69	0.11	2.63542	4.85343	48.9778
2006	251	67800	68400	68100	358	9.63	-54.67	-54.77	-54.62	0.05	1.86499	-2.26117	49.5427
2006	251	68400	69000	68700	358.4	9.77	-54.54	-54.66	-54.5	0.04	3.01514	6.07838	46.7614
2006	251	69000	69600	69300	358.6	9.81	-54.41	-54.55	-54.41	0	5.07049	4.60164	48.6784
2006	251	69600	70200	69900	358.5	9.39	-54.3	-54.46	-54.36	-0.06	3.60164	1.78441	47.9673
2006	251	70200	70800	70500	357.9	8.82	-54.3	-54.4	-54.35	-0.05	4.03962	3.46199	49.1764
2006	251	70800	71400	71100	358	8.66	-54.24	-54.36	-54.3	-0.06	2.42185	6.70544	48.5273
2006	251	71400	72000	71700	358.9	8.61	-54.1	-54.25	-54.14	-0.04	2.92025	3.70234	49.7639
2006	251	72000	72600	72300	356.7	8.81	-53.96	-54.11	-54.04	-0.08	2.99523	7.96001	46.9124
2006	251	72600	73200	72900	356.1	9.03	-53.84	-53.99	-53.88	-0.04	2.34264	7.74019	47.5955
2006	251	73200	73800	73500	356.3	9.13	-53.72	-53.84	-53.74	-0.02	2.26894	7.50862	48.8549
2006	251	73800	74400	74100	355.3	8.99	-53.64	-53.77	-53.65	-0.01	2.87266	7.64898	48.4364
2006	251	74400	75000	74700	353.2	8.94	-53.52	-53.67	-53.57	-0.05	2.46695	1.93321	47.0615
2006	251	75000	75600	75300	351.3	9.04	-53.35	-53.52	-53.36	-0.01	2.26653	8.1857	48.4151
2006	251	75600	76200	75900	350.8	9.2	-53.21	-53.39	-53.27	-0.06	1.9582	7.56892	49.1112
2006	251	76200	76800	76500	352.6	8.77	-53.08	-53.24	-53.14	-0.06	2.36234	3.44088	46.1816
2006	251	76800	77400	77100	354.3	8.51	-53.01	-53.16	-53.1	-0.09	3.66087	2.82525	46.8144
2006	251	77400	78000	77700	352.2	8.74	-52.99	-53.12	-53.04	-0.05	0.228814	8.05341	47.8917
2006	251	78000	78600	78300	352.7	8.55	-53.07	-53.17	-53.1	-0.03	4.35259	6.40723	47.5401
2006	251	78600	79200	78900	357.5	8.35	-53.1	-53.2	-53.16	-0.06	3.84876	3.56549	47.4377
2006	251	79200	79800	79500	0.2	8.16	-53.07	-53.2	-53.11	-0.04	1.98276	4.38202	45.0127
2006	251	79800	80400	80100	356.8	7.57	-53.08	-53.21	-53.16	-0.08	3.45047	6.02675	48.7903
2006	251	80400	81000	80700	358.2	8.21	-53.1	-53.2	-53.16	-0.06	3.39218	9.77321	47.8054
2006	251	81000	81600	81300	356.8	8.28	-53.01	-53.13	-53.1	-0.09	2.94864	10.5649	48.6548
2006	251	81600	82200	81900	355.9	8.44	-53	-53.16	-53.01	-0.01	-9999	-1.97904	48.1611
2006	251	82200	82800	82500	353.4	8.69	-52.99	-53.13	-53.02	-0.03	-9999	-9999	47.7518
2006	251	82800	83400	83100	355.7	8.74	-52.96	-53.06	-52.94	0.02	3.20615	-9999	46.2952
2006	251	83400	84000	83700	351.6	7.22	-53.09	-53.2	-53.18	-0.09	2.64521	7.73011	48.104
2006	251	84000	84600	84300	352.1	7.56	-53.19	-53.3	-53.28	-0.09	2.84736	3.16157	47.2073
2006	251	84600	85200	84900	355	8.02	-53.2333	-53.367	-53.28	-0.0466667	4.33423	6.07002	47.1751
2006	251	85200	85800	85500	356.3	8.35	-53.2	-53.37	-53.36	-0.16	2.10838	7.66863	45.0999
2006	251	85800.1	86400	86100	355.399	9.09002	-53.28	-53.4	-53.4	-0.119987	1.08838	12.6376	46.933
2006	252	0	600	300	353.2	9.11	-53.3	-53.49	-53.44	-0.14	-9999	-9999	-9999
2006	252	600	1200	900	353.8	8.9	-53.31	-53.54	-53.48	-0.17	-9999	-9999	-9999
2006	252	1200	1800	1500	354	7.48	-53.29	-53.5	-53.49	-0.2	4.62559	-9999	-9999
2006	252	1800	2400	2100	355.3	5.68	-53.17	-53.37	-53.34	-0.17	4.80521	8.50992	-9999
2006	252	2400	3000	2700	356.8	5.79	-53.14	-53.33	-53.3	-0.16	1.83797	8.31321	-9999
2006	252	3000	3600	3300	356.3	5.48	-53.1	-53.32	-53.3	-0.2	8.26186	7.06126	-9999
2006	252	3600	4200	3900	354.4	6.12	-53.02	-53.22	-53.23	-0.21	-0.133246	-9999	53.3261
2006	252	4200	4800	4500	354.9	6.45	-53.06	-53.22	-53.23	-0.17	2.25549	9.28612	50.8395
2006	252	4800	5400	5100	354.7	6.54	-53.19	-53.37	-53.36	-0.17	2.69257	6.24206	49.5197
2006	252	5400	6000	5700	352.1	7.1	-53.3	-53.46	-53.41	-0.11	2.20099	5.80644	49.5132
2006	252	6000	6600	6300	351.9	7.3	-53.33	-53.52	-53.5	-0.17	2.51753	3.33839	45.7931
2006	252	6600	7200	6900	352.2	7.4	-53.3	-53.5	-53.5	-0.2	4.34308	7.69879	47.7985
2006	252	7200	7800	7500	350.7	7.47	-53.4	-53.55	-53.52	-0.12	2.24272	5.2535	48.0145
2006	252	7800	8400	8100	351.2	7.13	-53.49	-53.6	-53.6	-0.11	4.28001	2.24592	47.4745
2006	252	8400	9000	8700	357	6.39	-53.54	-53.64	-53.6	-0.06	1.52999	5.2149	47.4188
2006	252	9000	9600	9300	358.9	6.26	-53.6	-53.67	-53.62	-0.02	2.09009	9.49966	47.6145
2006	252	9600	10200	9900	355.8	6.38	-53.66	-53.79	-53.69	-0.03	2.71567	6.92718	47.2967
2006	252	10200	10800	10500	357.7	6.49	-53.72	-53.86	-53.77	-0.05	2.50115	4.86199	46.8933
2006	252	10800	11400	11100	355.8	6.79	-53.72	-53.85	-53.81	-0.09	2.60075	6.65355	48.6128
2006	252	11400	12000	11700	352.3	7.63	-53.82	-53.93	-53.93	-0.11	3.6413	8.12022	47.7349
2006	252	12000	12600	12300	351.9	7.88	-53.93	-54.08	-54.03	-0.1	0.278402	12.6329	46.6307
2006	252	12600	13200	12900	352.8	7.52	-54	-54.18	-54.08	-0.08	2.05592	8.6266	48.6838
2006	252	13200	13800	13500	354	7.59	-54.08	-54.2	-54.11	-0.03	4.36878	7.81817	48.1124
2006	252	13800	14400	14100	357.9	7.16	-54.1	-54.24	-54.17	-0.07	2.59419	7.52761	47.9551
2006	252	14400	15000	14700	357.1	7.29	-54.1	-54.25	-54.18	-0.08	2.53587	2.02696	49.131
2006	252	15000	15600	15300	0.3	6.2	-54.14	-54.24	-54.18	-0.04	2.54299	5.95994	49.431
2006	252	15600	16200	15900	1.9	6.35	-54.29	-54.38	-54.28	0.01	1.18951	7.74996	48.7899
2006	252	16200	16800	16500	357.7	6.27	-54.51	-54.55	-54.43	0.08	2.05503	2.43748	49.8914
2006	252	16800	17400	17100	3.7	5.36	-54.64	-54.73	-54.65	-0.01	2.67892	0.405343	48.5016
2006	252	17400	18000	17700	9.3	4.5	-54.66	-54.8	-54.73	-0.07	2.97183	1.71658	49.9285
2006	252	18000	18600	18300	5.9	4.95	-54.69	-54.8	-54.8	-0.11	2.43459	4.40604	50.3906
2006	252	18600	19200	18900	2.8	5.47	-54.72	-54.88	-54.87	-0.15	1.89444	3.8371	48.8424
2006	252	19200	19800	19500	2.4	5.37	-54.81	-54.96	-54.9	-0.09	1.57393	3.99487	49.7116
2006	252	19800	20400	20100	0.9	5.39	-54.9	-55	-54.95	-0.05	3.42947	4.94678	49.0344
2006	252	20400	21000	20700	1.5	5.54	-55.01	-55.03	-55	0.01	3.26257	3.4695	49.1949
2006	252	21000	21600	21300	1.7	5.76	-55.1	-55.13	-55	0.1	0.674783	4.02612	51.0933
2006	252	21600	22200	21900	0.8	5.69	-55.21	-55.25	-55.12	0.09	2.35312	7.00366	47.7439
2006	252	22200	22800	22500	12	4.29	-55.34	-55.37	-55.25	0.09	3.086	3.51862	50.9297
2006	252	22800	23400	23100	15.9	4.62	-55.43	-55.46	-55.37	0.06	3.25068	4.70405	52.1125
2006	252	23400	24000	23700	15.7	4.54	-55.45	-55.44	-55.17	0.28	3.63997	2.30032	51.9342
2006	252	24000	24600	24300	13.6	4.74	-55.44	-55.37	-54.9	0.54	3.01216	6.32869	51.0832
2006	252	24600	25200	24900	13.5	4.84	-55.78	-55.72	-55.54	0.24	0.694433	3.10133	51.8014
2006	252	25200	25800	25500	5.6	5.35	-56.07	-55.99	-55.85	0.22	3.43187	5.94187	50.5064
2006	252	25800	26400	26100	357.5	5.83	-56.27	-56.26	-56.09	0.18	0.54229	7.89396	52.2307
2006	252	26400	27000	26700	354.1	6.26	-56.41	-56.41	-56.23	0.18	3.86575	3.90425	49.8865
2006	252	27000	27600	27300	357.9	6.5	-56.5	-56.57	-56.3	0.2	1.51524	4.30465	50.3656
2006	252	27600	28200	27900	354.7	6.97	-56.51	-56.56	-56.35	0.16	2.28436	1.60358	49.9642
2006	252	28200	28800	28500	356.4	6.36	-56.6	-56.63	-56.4	0.2	2.12757	-0.811134	50.7605
2006	252	28800	29400	29100	357.3	5.08	-56.6	-56.7	-56.52	0.08	1.62407	5.20429	52.195
2006	252	29400	30000	29700	7	3.44	-56.6	-56.74	-56.6	0	2.52291	5.35477	52.0028
2006	252	30000	30600	30300	0.4	4.55	-56.65	-56.77	-56.6	0.05	2.88169	4.54468	51.4105
2006	252	30600	31200	30900	1.1	4.52	-56.71	-56.78	-56.6	0.11	2.34357	6.18006	54.5856
2006	252	31200	31800	31500	1.5	3.86	-56.77	-56.78	-56.6	0.17	2.44728	5.45664	54.6115
2006	252	31800	32400	32100	0.8	3.9	-56.83	-56.8	-56.6	0.23	3.88882	2.24503	54.1272
2006	252	32400	33000	32700	5	4.19	-56.9	-56.84	-56.59	0.31	0.617484	9.11093	53.3707
2006	252	33000	33600	33300	15.7	3.68	-56.9	-56.84	-56.58	0.32	2.41365	4.45329	54.3354
2006	252	33600	34200	33900	28.2	3.37	-56.84	-56.79	-56.51	0.33	3.11622	4.06135	54.3908
2006	252	34200	34800	34500	35.1	3.26	-56.8	-56.64	-56.41	0.39	3.88286	3.96233	55.9884
2006	252	34800	35400	35100	38.8	3.52	-56.87	-56.59	-56.28	0.59	3.41607	-0.644102	56.1783
2006	252	35400	36000	35700	37.6	3.19	-56.98	-56.63	-56.25	0.73	4.821	-3.89636	57.0863
2006	252	36000	36600	36300	50.3	2.98	-57.05	-56.67	-56.28	0.77	6.80923	-3.19159	57.3936
2006	252	36600	37200	36900	66.1	2.7	-57.47	-57.01	-56.48	0.99	4.94478	6.10534	57.1623
2006	252	37200	37800	37500	49.8	2.93	-57.52	-57.18	-56.42	1.1	4.43788	2.74914	56.0593
2006	252	37800	38400	38100	50.8	2.85	-57.43	-57.06	-56.37	1.06	6.58134	2.61725	56.4861
2006	252	38400	39000	38700	58.9	2.79	-57.53	-57.12	-56.41	1.12	5.72437	-0.80075	56.9726
2006	252	39000	39600	39300	58.8	2.88	-57.59	-57.17	-56.54	1.05	4.45531	3.95572	55.0529
2006	252	39600	40200	39900	45.2	2.76	-57.48	-57.15	-56.51	0.97	-9999	-9999	-9999
2006	252	40200	40800	40500	47.6	3.09	-57.46	-56.98	-56.15	1.31	-9999	-9999	-9999
2006	252	40800	41400	41100	52.9	3	-57.57	-57.01	-56.18	1.39	7.81093	-9999	-9999
2006	252	41400	42000	41700	42.3	3.15	-57.57	-56.92	-55.88	1.69	6.61463	6.20016	-9999
2006	252	42000	42600	42300	40.2	2.96	-57.53	-56.89	-56	1.53	5.11147	1.9489	-9999
2006	252	42600	43200	42900	42.6	3.27	-57.48	-56.86	-56.06	1.42	14.3813	14.297	-9999
2006	252	43200	43800	43500	34.8	3.95	-57.34	-56.77	-56.03	1.31	3.46425	-9999	58.6803
2006	252	43800	44400	44100	32.8	3.79	-57.19	-56.79	-56.17	1.02	3.94796	3.0235	58.3523
2006	252	44400	45000	44700	38.9	3.66	-57.23	-56.8	-56.24	0.99	3.79058	3.72229	54.1461
2006	252	45000	45600	45300	42.8	3.45	-57.46	-56.91	-56.38	1.08	4.06556	1.97256	55.0556
2006	252	45600	46200	45900	34.3	3.68	-57.56	-56.87	-56.17	1.39	4.04808	2.94204	54.8496
2006	252	46200	46800	46500	39.8571	3.48571	-57.6714	-56.9	-56.1286	1.54286	7.12839	-4.15771	56.9899
2006	252	46800	47400	47100	44.7	3.27	-58.01	-57.1	-56.25	1.76	4.17334	8.1756	57.7177
2006	252	47400	48000	47700	53.3	3.35	-58.56	-57.46	-56.31	2.25	5.4651	8.47907	55.5433
2006	252	48000	48600	48300	61.5	3.48	-59	-57.95	-56.53	2.47	2.87383	5.10624	54.5231
2006	252	48600	49200	48900	57.1	3.77	-58.91	-57.92	-56.34	2.57	1.84289	6.31955	54.4685
2006	252	49200	49800	49500	52.6	3.92	-58.5	-57.87	-56.23	2.27	2.30226	7.12583	54.6857
2006	252	49800	50400	50100	55.5	3.65	-58.31	-57.89	-56.55	1.76	0.875138	7.01358	54.3911
2006	252	50400	51000	50700	56.7	3.68	-58.42	-57.96	-56.74	1.68	3.25168	9.72601	54.9481
2006	252	51000	51600	51300	54.3	4	-58.35	-57.93	-56.5	1.85	1.89517	1.96959	54.5791
2006	252	51600	52200	51900	56.5	3.75	-58.1143	-57.829	-56.8	1.31429	2.22433	6.08389	55.1326
2006	252	52200	52800	52500	60.4	3.8	-58.15	-57.9	-56.97	1.18	3.14967	0.0650104	53.3457
2006	252	52800	53400	53100	60.8	3.63	-58.82	-58.14	-57.06	1.76	3.81327	-0.151834	53.7399
2006	252	53400	54000	53700	59.9	3.58	-59.51	-58.5	-57.16	2.35	3.5546	3.47954	55.4677
2006	252	54000	54600	54300	51.6	3.86	-59.63	-58.26	-56.9	2.73	1.99656	2.28837	54.4089
2006	252	54600	55200	54900	52.5	3.8	-59.52	-58.16	-56.81	2.71	3.97674	-1.03566	54.1104
2006	252	55200	55800	55500	53.7	3.7	-59.8	-58.27	-56.82	2.98	3.90369	0.928175	56.4003
2006	252	55800	56400	56100	53.9	4.01	-59.96	-58.2	-56.35	3.61	2.80205	-0.147926	55.1763
2006	252	56400	57000	56700	60.8	3.88	-60.25	-58.44	-56.48	3.77	3.04233	6.48973	55.4504
2006	252	57000	57600	57300	70.2	4.11	-60.77	-59.27	-56.88	3.89	1.22686	6.41304	54.2153
2006	252	57600	58200	57900	61.3	4.04	-61.06	-59.56	-56.2	4.86	2.65967	4.48964	54.3917
2006	252	58200	58800	58500	56.5	4.05	-60.93	-59.19	-56.3	4.63	2.93061	8.63466	53.6568
2006	252	58800	59400	59100	56.2	4.63	-60.59	-59.09	-55.78	4.81	3.17176	-1.17201	52.3126
2006	252	59400	60000	59700	51.3	5	-60.16	-58.58	-54.72	5.44	3.77629	1.92758	53.4415
2006	252	60000	60600	60300	47.2	4.33	-59.7	-58.28	-54.81	4.89	4.83203	-3.77604	53.7478
2006	252	60600	61200	60900	37.2	4.51	-59.08	-57.35	-54.56	4.52	3.0233	1.1946	53.8276
2006	252	61200	61800	61500	44.2	4.27	-58.25	-56.56	-54.63	3.62	3.30448	0.967377	53.6677
2006	252	61800	62400	62100	42.8	4.18	-57.42	-56.18	-54.48	2.94	1.69271	5.59203	52.4492
2006	252	62400	63000	62700	33.8	4.63	-57.27	-55.91	-53.98	3.29	2.79448	-1.38122	50.9549
2006	252	63000	63600	63300	30.6	4.71	-56.83	-55.53	-53.2	3.63	3.76583	1.14867	51.9331
2006	252	63600	64200	63900	26.5	4.46	-56.75	-55.7	-53.71	3.04	5.5994	-1.92462	51.4553
2006	252	64200	64800	64500	16.1	5.89	-56.54	-55.41	-52.6	3.94	1.32566	1.85707	48.0106
2006	252	64800	65400	65100	16	6.18	-56.4	-55.14	-51.42	4.98	1.16476	-0.408497	49.0587
2006	252	65400	66000	65700	19.7	5.2	-56.47	-55.46	-52.23	4.24	3.2822	-3.33018	47.3455
2006	252	66000	66600	66300	21.1667	5.26667	-56.1143	-55.229	-52.2	3.91429	1.48291	-0.67401	47.037
2006	252	66600	67200	66900	37.6	3.93	-56.47	-55.45	-53.97	2.5	3.00158	4.84359	47.0675
2006	252	67200	67800	67500	32.6	4.03	-56.53	-55.54	-54.25	2.28	2.40835	7.19967	50.9236
2006	252	67800	68400	68100	36.6	4.28	-55.61	-54.95	-53.75	1.86	4.69206	-0.286447	48.3052
2006	252	68400	69000	68700	44.6	3.57	-56.24	-55.15	-54.24	2	3.52918	0.0536183	47.8659
2006	252	69000	69600	69300	38.7	4.36	-55.55	-54.68	-53.5	2.05	2.52293	-4.68719	45.9608
2006	252	69600	70200	69900	30.5	4.72	-55.38	-54.3	-53.23	2.15	0.950891	1.76147	47.4842
2006	252	70200	70800	70500	28.9	4.83	-54.74	-54.2	-53.43	1.31	2.25152	5.75679	46.1054
2006	252	70800	71400	71100	26.6	5.02	-54.52	-54.15	-53.68	0.84	-0.47825	-1.14168	45.2298
2006	252	71400	72000	71700	34.9	5.21	-54.6	-54.24	-53.8	0.8	2.76105	1.79099	47.02
2006	252	72000	72600	72300	31.2	5.49	-54.63	-54.28	-53.75	0.88	2.85631	6.15346	45.9378
2006	252	72600	73200	72900	31.5	5.35	-54.69	-54.34	-53.65	1.04	-0.628758	8.42308	45.9484
2006	252	73200	73800	73500	34.8	4.74	-54.65	-54.37	-53.61	1.04	1.04467	2.25218	45.6103
2006	252	73800	74400	74100	33.6	4.55	-54.52	-54.1	-53.4	1.12	2.0132	4.13915	45.7107
2006	252	74400	75000	74700	34.4	4.67	-54.5	-53.97	-53.26	1.24	1.28401	3.62342	45.4402
2006	252	75000	75600	75300	38.2	4.77	-54.57	-53.92	-53.15	1.42	2.18615	-4.85493	44.9204
2006	252	75600	76200	75900	41.5	4.37	-54.66	-53.93	-52.98	1.68	3.83397	2.88361	46.4948
2006	252	76200	76800	76500	39.4	4.44	-56.01	-54.44	-53.33	2.68	3.17609	-2.23051	47.1832
2006	252	76800	77400	77100	37.3	4.66	-54.72	-53.97	-52.9	1.82	0.854873	3.39016	46.3912
2006	252	77400	78000	77700	37.9	4.57	-54.48	-54	-52.91	1.57	0.696213	5.02177	45.5536
2006	252	78000	78600	78300	37.3333	4.5	-54.2333	-53.867	-52.8667	1.36667	3.94482	-0.773882	43.7802
2006	252	78600	79200	78900	999	-9999	-9999	-9999	-9999	-9999	1.38509	4.16199	44.2386
2006	252	79200	79800	79500	999	-9999	-9999	-9999	-9999	-9999	-9999	-9999	-9999
2006	252	79800	80400	80100	999	-9999	-9999	-9999	-9999	-9999	-9999	-9999	-9999
2006	252	80400	81000	80700	999	-9999	-9999	-9999	-9999	-9999	-0.188157	-9999	-9999
2006	252	81000	81600	81300	999	-9999	-9999	-9999	-9999	-9999	1.80458	7.06289	-9999
2006	252	81600	82200	81900	999	-9999	-9999	-9999	-9999	-9999	1.93395	1.78897	-9999
2006	252	82200	82800	82500	999	-9999	-9999	-9999	-9999	-9999	-0.814887	3.05023	-9999
2006	252	82800	83400	83100	999	-9999	-9999	-9999	-9999	-9999	3.80476	-9999	47.8589
2006	252	83400	84000	83700	999	-9999	-9999	-9999	-9999	-9999	3.13716	1.46609	47.1345
2006	252	84000	84600	84300	999	-9999	-9999	-9999	-9999	-9999	0.0425545	5.50135	47.1585
2006	252	84600	85200	84900	999	-9999	-9999	-9999	-9999	-9999	0.638808	3.59168	-9999
2006	252	85200	85800	85500	999	-9999	-9999	-9999	-9999	-9999	-0.219369	4.55113	-9999
2006	252	85800.1	86400	86100	999	-9999	-9999	-9999	-9999	-9999	-0.530837	1.83237	-9999
2006	253	0	600	300	999	-9999	-9999	-9999	-9999	-9999	1.89665	5.97267	-9999
2006	253	600	1200	900	999	-9999	-9999	-9999	-9999	-9999	-9999	-1.71302	-9999
2006	253	1200	1800	1500	34	5.1	-55	-54.233	-53.2333	1.76667	2.71108	0.409562	-9999
2006	253	1800	2400	2100	36.8889	5.05556	-55	-54.16	-53.09	1.91	1.6538	1.53374	48.6177
2006	253	2400	3000	2700	31.5714	5.74286	-54.8143	-53.986	-52.7286	2.08571	2.78594	-2.57204	49.6997
2006	253	3000	3600	3300	23.6	6.57	-54.74	-53.86	-51.75	2.99	2.65875	3.298	47.0076
2006	253	3600	4200	3900	20.8	6.91	-54.41	-53.52	-50.95	3.46	1.79059	-4.5014	46.6915
2006	253	4200	4800	4500	22.7	6.83	-54.05	-53.12	-50.6	3.45	1.62262	2.04877	48.1319
2006	253	4800	5400	5100	27.5	6.28	-53.99	-53.21	-51.7	2.29	2.4767	2.97864	47.5719
2006	253	5400	6000	5700	35.3	5.76	-54.17	-53.45	-52.55	1.62	1.31539	-1.60107	47.5928
2006	253	6000	6600	6300	35.1	5.59	-54.35	-53.69	-53.05	1.3	2.79967	-2.65181	45.97
2006	253	6600	7200	6900	32	5.69	-54.37	-53.77	-53.04	1.33	2.33771	0.715311	48.5628
2006	253	7200	7800	7500	24	6.36	-54.28	-53.75	-52.81	1.47	1.87412	-0.280398	47.5925
2006	253	7800	8400	8100	22.8	6.98	-54.27	-53.76	-52.83	1.44	1.50741	1.5578	46.9353
2006	253	8400	9000	8700	23.7	7	-54.35	-53.83	-52.74	1.61	0.378636	2.35028	46.8749
2006	253	9000	9600	9300	21.1	7.46	-54.06	-53.58	-52.56	1.5	0.92241	1.57887	48.0435
2006	253	9600	10200	9900	20.2	8.03	-53.91	-53.39	-52.38	1.53	2.49692	2.18797	48.9792
2006	253	10200	10800	10500	25.9	7.33	-53.87	-53.33	-52.53	1.34	1.39058	-0.814822	47.3452
2006	253	10800	11400	11100	28	6.52	-54.13	-53.61	-52.86	1.27	2.36453	2.31937	45.9298
2006	253	11400	12000	11700	27.5	6.82	-54.12	-53.6	-52.77	1.35	0.408188	3.52064	47.2031
2006	253	12000	12600	12300	28.7	7.06	-54.01	-53.49	-52.58	1.43	-0.606053	4.57373	46.1319
2006	253	12600	13200	12900	27.9	7.03	-53.91	-53.32	-52.38	1.53	2.08913	2.44936	45.898
2006	253	13200	13800	13500	23.6	7.32	-53.83	-53.26	-52.33	1.5	0.795439	0.593174	45.8852
2006	253	13800	14400	14100	20.8	7.65	-53.78	-53.25	-52.27	1.51	2.77784	1.58559	45.4108
2006	253	14400	15000	14700	23	7.68	-53.84	-53.3	-52.31	1.53	4.07121	-3.1159	45.7814
2006	253	15000	15600	15300	23.3	7.74	-53.73	-53.18	-52.17	1.56	1.5685	0.982837	45.4234
2006	253	15600	16200	15900	21.9	7.93	-53.5	-52.96	-51.84	1.66	2.51858	-0.222934	46.2371
2006	253	16200	16800	16500	25.7	7.89	-53.4	-52.84	-51.74	1.66	1.4614	1.15542	45.9841
2006	253	16800	17400	17100	31.2	7.25	-53.41	-52.84	-51.92	1.49	1.51374	-1.22028	45.4134
2006	253	17400	18000	17700	30.3	7.13	-53.46	-52.9	-52.17	1.29	1.44055	-5.8577	45.1878
2006	253	18000	18600	18300	27.7	7.19	-53.55	-53.01	-52.3	1.25	2.62419	-3.55758	46.7066
2006	253	18600	19200	18900	29.1	7.4	-53.58	-53.08	-52.25	1.33	1.54374	-0.413444	46.9251
2006	253	19200	19800	19500	26.7	7.71	-53.67	-53.17	-52.44	1.23	2.92813	-6.32192	46.8605
2006	253	19800	20400	20100	25.8	7.52	-53.76	-53.28	-52.54	1.22	1.70017	2.61587	47.504
2006	253	20400	21000	20700	25.9	7.36	-53.73	-53.31	-52.64	1.09	1.50852	7.2665	46.8832
2006	253	21000	21600	21300	21.5	7.55	-53.8	-53.41	-52.81	0.99	-1.31964	4.42101	45.4764
2006	253	21600	22200	21900	17.1	7.7	-54.09	-53.69	-53.14	0.95	2.07896	2.58633	45.0891
2006	253	22200	22800	22500	18	7.75	-54.33	-53.94	-53.28	1.05	1.61606	4.37084	46.321
2006	253	22800	23400	23100	20.3333	7.21111	-54.42	-54.07	-53.44	0.98	2.7707	2.03512	46.2943
2006	253	23400	24000	23700	26.8	6.78	-54.39	-54.07	-53.5	0.89	2.06444	-0.564954	47.1024
2006	253	24000	24600	24300	49.1	5.22	-54.56	-54.23	-53.93	0.63	1.3516	-0.79899	46.0517
2006	253	24600	25200	24900	46.4	5.3	-54.78	-54.42	-54.13	0.65	3.0122	2.9334	47.8532
2006	253	25200	25800	25500	36.6	5.66	-54.91	-54.51	-54.1	0.81	0.342731	1.87837	47.7445
2006	253	25800	26400	26100	32.2	5.84	-54.98	-54.58	-54.08	0.9	2.53919	-0.97141	48.1553
2006	253	26400	27000	26700	37.6	5.61	-55.08	-54.64	-54.21	0.87	3.76541	-2.19238	48.1462
2006	253	27000	27600	27300	26.2	5.94	-55.25	-54.81	-54.34	0.91	0.29467	-2.58422	46.2311
2006	253	27600	28200	27900	24.8	6.05	-55.29	-54.83	-54.25	1.04	2.66292	-0.0763396	47.1
2006	253	28200	28800	28500	36.3	5.48	-55.53	-54.94	-54.38	1.15	2.33341	-4.25338	47.5305
2006	253	28800	29400	29100	30.9	5.33	-55.78	-55.14	-54.52	1.26	0.999632	3.44994	49.1248
2006	253	29400	30000	29700	34.4	5.22	-56.05	-55.37	-54.67	1.38	2.27657	-8.35128	48.9793
2006	253	30000	30600	30300	34.5	4.61	-56.18	-55.51	-54.78	1.4	3.20163	-0.106096	48.7888
2006	253	30600	31200	30900	37.3	4.86	-56.11	-55.39	-54.64	1.47	2.57359	0.202025	49.0123
2006	253	31200	31800	31500	34.2	5.85	-55.89	-55.08	-54.25	1.64	1.43555	-1.74631	48.1572
2006	253	31800	32400	32100	36.5	5.79	-56.17	-55.2	-54.35	1.82	0.574742	1.14632	48.7666
2006	253	32400	33000	32700	34.8	6.15	-56.01	-55.14	-54.23	1.78	-9999	-9999	-9999
2006	253	33000	33600	33300	34.7	6.13	-55.94	-55.17	-54.3	1.64	-9999	-9999	-9999
2006	253	33600	34200	33900	30	6.49	-55.87	-55.16	-54.24	1.63	2.39959	-9999	-9999
2006	253	34200	34800	34500	27.2	6.57	-55.94	-55.26	-54.45	1.49	0.744879	7.65487	-9999
2006	253	34800	35400	35100	24	7.21	-55.76	-55.19	-54.34	1.42	0.865469	-0.0602564	-9999
2006	253	35400	36000	35700	24.1	6.92	-55.73	-55.2	-54.46	1.27	0.893083	-8.09686	-9999
2006	253	36000	36600	36300	26.2	6.14	-55.82	-55.38	-54.86	0.96	-1.92339	-9999	51.9768
2006	253	36600	37200	36900	25.8	6.19	-56.02	-55.66	-55.22	0.8	2.01107	6.07058	53.1777
2006	253	37200	37800	37500	22.5	6.57	-56.22	-55.9	-55.41	0.81	1.67302	4.45657	53.5037
2006	253	37800	38400	38100	25.6	6.25	-56.16	-55.92	-55.41	0.75	1.16562	1.93057	54.1543
2006	253	38400	39000	38700	28.7	6.17	-55.92	-55.74	-55.35	0.57	2.18515	5.97736	54.0844
2006	253	39000	39600	39300	29.8	5.88	-55.8	-55.7	-55.37	0.43	2.45433	2.66713	53.083
2006	253	39600	40200	39900	23.8	6.72	-55.59	-55.53	-55.16	0.43	2.23344	3.54324	51.4459
2006	253	40200	40800	40500	18.3	7.59	-55.29	-55.22	-54.83	0.46	0.831485	-3.60051	51.7827
2006	253	40800	41400	41100	20.1	7.31	-55.33	-55.26	-54.96	0.37	2.18755	-1.3415	49.9734
2006	253	41400	42000	41700	20.4	6.87	-55.37	-55.33	-55.04	0.33	2.24477	2.459	48.3931
2006	253	42000	42600	42300	17.5	6.7	-55.45	-55.39	-55.08	0.37	0.392987	3.26323	51.2458
2006	253	42600	43200	42900	15.7	6.59	-55.37	-55.33	-54.96	0.41	3.12011	2.30855	49.2594
2006	253	43200	43800	43500	10.8	6.65	-55.35	-55.27	-54.92	0.43	3.6631	6.26665	49.0879
2006	253	43800	44400	44100	11.6	5.27	-55.25	-55.21	-54.9	0.35	2.30783	3.81829	49.8993
2006	253	44400	45000	44700	13.3333	5.81667	-55.0857	-55.043	-54.8	0.285714	1.94615	3.82266	51.403
2006	253	45000	45600	45300	14.8	6.82	-55	-55	-54.7	0.3	0.340276	4.18801	50.3346
2006	253	45600	46200	45900	14.3	7.1	-54.94	-54.91	-54.65	0.29	2.46596	-1.21296	52.5096
2006	253	46200	46800	46500	14.1	7.51	-54.85	-54.75	-54.44	0.41	-0.649984	5.9301	49.6867
2006	253	46800	47400	47100	12.3	7.65	-54.78	-54.66	-54.4	0.38	2.05941	1.36076	48.5774
2006	253	47400	48000	47700	13.5	7.92	-54.74	-54.64	-54.26	0.48	2.16821	2.2641	49.8974
2006	253	48000	48600	48300	13.4	7.76	-54.59	-54.5	-54.1	0.49	3.24941	0.145997	50.9729
2006	253	48600	49200	48900	15.5	7.57	-54.6	-54.5	-54.15	0.45	1.97546	1.43618	49.4108
2006	253	49200	49800	49500	13	6.79	-54.62	-54.5	-54.13	0.49	2.00884	4.72639	49.4351
2006	253	49800	50400	50100	13.1	4.6	-54.82	-54.66	-54.39	0.43	2.34469	-1.50754	50.0699
2006	253	50400	51000	50700	13.4	3.63	-54.96	-54.86	-54.59	0.37	0.575438	-1.75085	51.4353
2006	253	51000	51600	51300	15.3	4.78	-55.16	-54.96	-54.51	0.65	1.02618	-0.602835	51.1194
2006	253	51600	52200	51900	13.2	5.64	-55.35	-55.04	-54.44	0.91	0.296037	-4.75703	49.1376
2006	253	52200	52800	52500	10	6.64	-55.48	-55.07	-54.17	1.31	1.81212	-0.634913	49.5859
2006	253	52800	53400	53100	9.1	6.8	-55.46	-54.96	-53.94	1.52	2.3105	3.79681	50.9852
2006	253	53400	54000	53700	7.4	7.14	-55.47	-54.97	-54.01	1.46	2.27229	-0.62757	51.1002
2006	253	54000	54600	54300	7.28571	7.24286	-55.5	-55	-53.7571	1.74286	1.99291	-1.85728	50.375
2006	253	54600	55200	54900	8.3	7.15	-55.51	-54.94	-53.68	1.83	4.34647	-5.18405	51.5806
2006	253	55200	55800	55500	8.2	7.23	-55.5	-54.88	-53.46	2.04	1.60098	3.16641	50.0397
2006	253	55800	56400	56100	8.3	7.23	-55.36	-54.77	-53.35	2.01	1.71716	1.66524	52.6951
2006	253	56400	57000	56700	9.2	7.58	-55.46	-54.68	-53.23	2.23	2.81399	-1.25108	50.4917
2006	253	57000	57600	57300	12	7.61	-55.48	-54.63	-52.96	2.52	2.95005	-2.89314	49.9573
2006	253	57600	58200	57900	15.4	7.23	-55.43	-54.58	-52.9	2.53	1.88278	-1.53737	51.1743
2006	253	58200	58800	58500	27.4	5.44	-55.64	-54.89	-53.42	2.22	2.32507	-4.51957	51.8411
2006	253	58800	59400	59100	51.5	3.63	-56.43	-55.47	-54.57	1.86	1.87337	0.0102922	52.7056
2006	253	59400	60000	59700	50.4	3.62	-56.91	-55.76	-54.9	2.01	1.10104	-0.0458797	50.7549
2006	253	60000	60600	60300	44.5	3.92	-56.32	-55.57	-54.85	1.47	1.89372	1.98816	53.0156
2006	253	60600	61200	60900	43.3	3.63	-55.99	-55.54	-54.93	1.06	3.53949	1.31336	54.9252
2006	253	61200	61800	61500	40.9	3.41	-55.98	-55.63	-55.06	0.92	2.59834	8.89382	53.9995
2006	253	61800	62400	62100	36.8	3.53	-55.97	-55.61	-54.93	1.04	2.24432	-0.772036	53.4061
2006	253	62400	63000	62700	34	4.1	-55.93	-55.42	-54.67	1.26	2.01222	2.45251	52.6774
2006	253	63000	63600	63300	26.4	4.57	-56	-55.17	-54.42	1.58	1.40856	3.7561	52.9402
2006	253	63600	64200	63900	15.6	4.88	-55.98	-55.16	-54.23	1.75	1.35056	0.972771	52.9708
2006	253	64200	64800	64500	7.2	5.74	-56.2	-55.34	-54	2.2	3.87621	-0.973847	52.0016
2006	253	64800	65400	65100	6	5.96	-56.45	-55.64	-53.82	2.63	4.3511	-5.59981	52.3097
2006	253	65400	66000	65700	6.3	6.49	-56.59	-55.73	-53.34	3.25	3.5659	-5.18509	53.026
2006	253	66000	66600	66300	8	6.2	-56.7167	-55.817	-53.3167	3.4	2.33595	1.79456	54.3333
2006	253	66600	67200	66900	15.2	5.05	-56.76	-55.89	-53.7	3.06	2.79053	-1.02085	51.1723
2006	253	67200	67800	67500	30.2	4.12	-56.66	-55.98	-54.87	1.79	1.78258	-1.93657	54.9298
2006	253	67800	68400	68100	25.9	4.68	-56.53	-55.7	-54.73	1.8	1.84962	0.639709	53.5767
2006	253	68400	69000	68700	30.375	4.75	-56.6	-55.6	-54.6875	1.9125	1.14879	-0.298962	53.6058
2006	253	69000	69600	69300	32.2222	5.15556	-56.5333	-55.522	-54.2889	2.24444	-0.265058	-0.413008	52.7973
2006	253	69600	70200	69900	35.5	5.01	-56.3	-55.31	-54.07	2.23	0.520229	2.40293	51.1271
2006	253	70200	70800	70500	36.6	4.72	-56.34	-55.31	-54.06	2.28	1.52934	4.5577	54.1974
2006	253	70800	71400	71100	35	4.65	-56.23	-55.27	-54.06	2.17	2.12518	-8.26081	53.0491
2006	253	71400	72000	71700	33.6	4.89	-56.13	-55.18	-54.06	2.07	1.21295	-5.60218	52.231
2006	253	72000	72600	72300	36.7	4.98	-56.26	-55.29	-54.18	2.08	-9999	-9999	-9999
2006	253	72600	73200	72900	36.5	5.38	-56.17	-55.32	-54.28	1.89	-9999	-9999	-9999
2006	253	73200	73800	73500	35.6	5.15	-56.21	-55.48	-54.46	1.75	2.6507	-9999	-9999
2006	253	73800	74400	74100	31.2	5.18	-56.03	-55.44	-54.52	1.51	0.537427	3.97182	-9999
2006	253	74400	75000	74700	29.9	5.03	-56.09	-55.46	-54.54	1.55	1.29255	6.2815	-9999
2006	253	75000	75600	75300	26.7	4.91	-56.1	-55.54	-54.64	1.46	-1.92007	-0.957896	-9999
2006	253	75600	76200	75900	30.1	4.32	-56.04	-55.6	-54.96	1.08	-0.926389	-9999	51.3873
2006	253	76200	76800	76500	29.8	4.48	-55.75	-55.45	-54.83	0.92	1.82722	0.821549	49.2587
2006	253	76800	77400	77100	26.5	4.54	-55.46	-55.26	-54.71	0.75	1.91618	-4.91843	47.6317
2006	253	77400	78000	77700	24.9	4.65	-55.43	-55.19	-54.66	0.77	-0.809592	1.85026	45.6716
2006	253	78000	78600	78300	19.9	5.17	-55.33	-55	-54.29	1.04	0.562782	-2.67748	46.5738
2006	253	78600	79200	78900	22	5.2	-55.14	-54.82	-54.27	0.87	-1.24508	2.77019	44.3833
2006	253	79200	79800	79500	25.5	5.22	-55.12	-54.74	-54.21	0.91	1.81442	-3.96964	43.5931
2006	253	79800	80400	80100	37.6	4.07	-55.34	-54.94	-54.4	0.94	0.670885	-2.3637	44.4639
2006	253	80400	81000	80700	31.8	4.43	-55.41	-54.83	-54.25	1.16	1.45098	-6.19923	43.2936
2006	253	81000	81600	81300	29.9	4.96	-55.42	-54.83	-54.16	1.26	-0.969636	-0.248465	41.5524
2006	253	81600	82200	81900	34.4	4.49	-55.56	-55.14	-54.5	1.06	0.398445	3.11456	40.9339
2006	253	82200	82800	82500	35.1	4.26	-55.68	-55.29	-54.67	1.01	2.17712	-3.8727	40.6585
2006	253	82800	83400	83100	25.6	4.83	-55.72	-55.35	-54.58	1.14	-1.80904	-7.52105	38.6452
2006	253	83400	84000	83700	23.2	5.57	-55.9	-55.39	-54.23	1.67	-1.66763	-3.36342	38.515
2006	253	84000	84600	84300	24.6	5.58	-56.15	-55.49	-54.14	2.01	-3.15075	-0.25845	38.5083
2006	253	84600	85200	84900	31.5	5.3	-56.49	-55.78	-54.76	1.73	0.610447	-6.02973	37.623
2006	253	85200	85800	85500	24.7	6.09	-56.69	-55.82	-54.51	2.18	0.246175	-6.27825	38.0377
2006	253	85800.1	86400	86100	24.8003	6.05998	-56.77	-55.93	-54.39	2.38001	-4.10943	-7.979	37.2094
2006	254	0	600	300	20.9	5.97	-56.85	-56.09	-54.74	2.11	-9999	-9999	-9999
2006	254	600	1200	900	24.3	5.91	-56.99	-56.34	-54.94	2.05	-9999	-9999	-9999
2006	254	1200	1800	1500	26.5	5.68333	-57.0125	-56.313	-55.1625	1.85	-9999	-9999	-9999
2006	254	1800	2400	2100	27.1111	5.36667	-57.05	-56.41	-55.39	1.66	-9999	-9999	-9999
2006	254	2400	3000	2700	33.6	4.81	-57.07	-56.46	-55.44	1.63	-9999	-9999	-9999
2006	254	3000	3600	3300	38.8	4.52	-57.14	-56.65	-55.66	1.48	-9999	-9999	-9999
2006	254	3600	4200	3900	47.5	3.7	-57.43	-56.91	-56.1	1.33	-9999	-9999	-9999
2006	254	4200	4800	4500	38	4.04	-57.04	-56.7	-55.89	1.15	-9999	-9999	-9999
2006	254	4800	5400	5100	42.8	3.99	-56.98	-56.62	-55.81	1.17	-9999	-9999	-9999
2006	254	5400	6000	5700	30.5	4.25	-56.93	-56.53	-55.74	1.19	-9999	-9999	-9999
2006	254	6000	6600	6300	26.4	4.34	-56.73	-56.28	-55.5	1.23	-9999	-9999	-9999
2006	254	6600	7200	6900	30.2	3.8	-56.64	-56.33	-55.71	0.93	-9999	-9999	-9999
2006	254	7200	7800	7500	23.8	4.5	-56.57	-56.27	-55.63	0.94	-9999	-9999	-9999
2006	254	7800	8400	8100	28.4	4.3	-56.56	-56.34	-55.64	0.92	-9999	-9999	-9999
2006	254	8400	9000	8700	41.6	3.78	-56.5	-56.36	-55.95	0.55	-9999	-9999	-9999
2006	254	9000	9600	9300	42.3	3.48	-56.46	-56.3	-55.88	0.58	-9999	-9999	-9999
2006	254	9600	10200	9900	28.1	4.46	-56.21	-56.06	-55.55	0.66	-9999	-9999	-9999
2006	254	10200	10800	10500	25.7	4.95	-56.08	-55.9	-55.34	0.74	-9999	-9999	-9999
2006	254	10800	11400	11100	22.1	4.74	-56.07	-55.98	-55.44	0.63	-9999	-9999	-9999
2006	254	11400	12000	11700	17	5.1	-56	-56	-55.4	0.6	-9999	-9999	-9999
2006	254	12000	12600	12300	999	99.9	-55.9	-55.8	-55.1	0.8	-9999	-9999	-9999
2006	254	12600	13200	12900	17	5.85556	-55.9333	-55.833	-55.1778	0.755556	-9999	-9999	-9999
2006	254	13200	13800	13500	20	5.37	-56.1	-56	-55.42	0.68	-9999	-9999	-9999
2006	254	13800	14400	14100	28.4	4.51	-56.1	-56.02	-55.6	0.5	-9999	-9999	-9999
2006	254	14400	15000	14700	37.1	3.94	-56.09	-56.09	-55.76	0.33	-9999	-9999	-9999
2006	254	15000	15600	15300	43.9	3.77	-56.09	-56.04	-55.76	0.33	-9999	-9999	-9999
2006	254	15600	16200	15900	45.7	3.93	-56.27	-56.15	-55.82	0.45	-9999	-9999	-9999
2006	254	16200	16800	16500	44.6	4.21	-56.53	-56.36	-55.9	0.63	-9999	-9999	-9999
2006	254	16800	17400	17100	41.8	4.39	-56.59	-56.44	-55.98	0.61	-9999	-9999	-9999
2006	254	17400	18000	17700	44.5	4.7	-56.6	-56.41	-55.83	0.77	-9999	-9999	-9999
2006	254	18000	18600	18300	53.9	4.09	-56.62	-56.43	-55.95	0.67	-9999	-9999	-9999
2006	254	18600	19200	18900	51.1	3.97	-56.65	-56.46	-55.92	0.73	-9999	-9999	-9999
2006	254	19200	19800	19500	60	3.27	-57.18	-56.74	-56.04	1.14	-9999	-9999	-9999
2006	254	19800	20400	20100	52.2	3.06	-57.82	-57.16	-56.2	1.62	-9999	-9999	-9999
2006	254	20400	21000	20700	50.3	3.02	-57.83	-57.26	-56.17	1.66	-9999	-9999	-9999
2006	254	21000	21600	21300	46.6	3.59	-57.98	-57.14	-55.9	2.08	-9999	-9999	-9999
2006	254	21600	22200	21900	40.5	3.76	-57.64	-56.93	-55.74	1.9	-9999	-9999	-9999
2006	254	22200	22800	22500	44.7	4.16	-57.7	-56.92	-55.64	2.06	-9999	-9999	-9999
2006	254	22800	23400	23100	44.3	4.57	-57.97	-56.92	-55.57	2.4	-9999	-9999	-9999
2006	254	23400	24000	23700	44.4	4.53	-58.28	-57.24	-55.75	2.53	-9999	-9999	-9999
2006	254	24000	24600	24300	44.5	4.46	-58.05	-57.2	-55.87	2.18	-9999	-9999	-9999
2006	254	24600	25200	24900	38.4	5.13	-57.7	-57.05	-55.79	1.91	-9999	-9999	-9999
2006	254	25200	25800	25500	39.1	5.01	-57.6	-56.98	-55.79	1.81	-9999	-9999	-9999
2006	254	25800	26400	26100	39.4	5.32	-57.57	-57	-55.87	1.7	-9999	-9999	-9999
2006	254	26400	27000	26700	43.2	5.25	-57.55	-57.06	-56.17	1.38	-9999	-9999	-9999
2006	254	27000	27600	27300	37.7	5.45	-57.54	-57.08	-56.14	1.4	-9999	-9999	-9999
2006	254	27600	28200	27900	28.4	6.46	-57.44	-56.92	-55.51	1.93	-9999	-9999	-9999
2006	254	28200	28800	28500	28.6	6.53	-57.38	-56.72	-54.85	2.53	-9999	-9999	-9999
2006	254	28800	29400	29100	35.3	6.02	-57.48	-56.74	-55.2	2.28	-9999	-9999	-9999
2006	254	29400	30000	29700	40.8	5.89	-57.6	-56.86	-55.52	2.08	-9999	-9999	-9999
2006	254	30000	30600	30300	45.9	5.41	-58.11	-57.41	-56.27	1.84	-9999	-9999	-9999
2006	254	30600	31200	30900	42.6	5.5	-58.33	-57.6	-56.36	1.97	-9999	-9999	-9999
2006	254	31200	31800	31500	43.2	5.15	-58.57	-57.81	-56.47	2.1	-9999	-9999	-9999
2006	254	31800	32400	32100	38.1	5.93	-58.14	-57.42	-55.99	2.15	-9999	-9999	-9999
2006	254	32400	33000	32700	33.3	6.31	-57.98	-57.22	-55.74	2.24	-9999	-9999	-9999
2006	254	33000	33600	33300	31.6	6.22	-57.7	-57.03	-55.54	2.16	-9999	-9999	-9999
2006	254	33600	34200	33900	33.3	5.94	-57.8	-57.12	-55.99	1.81	-9999	-9999	-9999
2006	254	34200	34800	34500	36.2	5.87	-57.82	-57.16	-56.16	1.66	-9999	-9999	-9999
2006	254	34800	35400	35100	32	6.3	-57.52	-56.94	-55.89	1.63	-9999	-9999	-9999
2006	254	35400	36000	35700	35.2	6.33	-57.54	-56.98	-56.06	1.48	-9999	-9999	-9999
2006	254	36000	36600	36300	33.6	6.19	-57.36	-56.9	-55.97	1.39	-9999	-9999	-9999
2006	254	36600	37200	36900	35.5	6.14	-57.44	-56.96	-56.09	1.35	-9999	-9999	-9999
2006	254	37200	37800	37500	38.4	6.13	-57.56	-57.09	-56.39	1.17	-9999	-9999	-9999
2006	254	37800	38400	38100	37.1	6.38	-57.52	-57.08	-56.37	1.15	-9999	-9999	-9999
2006	254	38400	39000	38700	41	6.52	-57.52	-57.1	-56.42	1.1	-9999	-9999	-9999
2006	254	39000	39600	39300	37.4	6.55	-57.58	-57.17	-56.46	1.12	-9999	-9999	-9999
2006	254	39600	40200	39900	39.5	6.52	-57.58	-57.22	-56.59	0.99	-9999	-9999	-9999
2006	254	40200	40800	40500	42	6.33	-57.61	-57.3	-56.64	0.97	-9999	-9999	-9999
2006	254	40800	41400	41100	39.2	6.26	-57.61	-57.26	-56.51	1.1	-9999	-9999	-9999
2006	254	41400	42000	41700	38.5	6.5	-57.43	-57.07	-56.25	1.18	-9999	-9999	-9999
2006	254	42000	42600	42300	39.2	6.4	-57.35	-57	-56.3	1.05	-9999	-9999	-9999
2006	254	42600	43200	42900	36.5	6.31	-57.37	-57.04	-56.32	1.05	-9999	-9999	-9999
2006	254	43200	43800	43500	27.4	7	-57.22	-56.87	-55.95	1.27	-9999	-9999	-9999
2006	254	43800	44400	44100	23.8	7.58	-57.05	-56.68	-55.57	1.48	-9999	-9999	-9999
2006	254	44400	45000	44700	30.2	7.55	-57.1	-56.73	-55.85	1.25	-9999	-9999	-9999
2006	254	45000	45600	45300	36.7	7.07	-57.48	-57.12	-56.51	0.97	-9999	-9999	-9999
2006	254	45600	46200	45900	36.4	7.07	-57.68	-57.33	-56.65	1.03	-9999	-9999	-9999
2006	254	46200	46800	46500	36.3	7.03	-57.7	-57.4	-56.69	1.01	-9999	-9999	-9999
2006	254	46800	47400	47100	35	7.04	-57.71	-57.47	-56.8	0.91	-9999	-9999	-9999
2006	254	47400	48000	47700	37.3	7.09	-57.67	-57.44	-56.83	0.84	-9999	-9999	-9999
2006	254	48000	48600	48300	36.7	7.1	-57.7	-57.48	-56.78	0.92	-9999	-9999	-9999
2006	254	48600	49200	48900	34.3	6.86	-57.79	-57.5	-56.86	0.93	-9999	-9999	-9999
2006	254	49200	49800	49500	30.3	7.18	-57.76	-57.5	-56.8	0.96	-9999	-9999	-9999
2006	254	49800	50400	50100	30.6	7.13	-57.81	-57.56	-56.87	0.94	-9999	-9999	-9999
2006	254	50400	51000	50700	28.6	7.04	-57.9	-57.68	-57.02	0.88	-9999	-9999	-9999
2006	254	51000	51600	51300	30	7.04	-57.9	-57.64	-56.9	1	-9999	-9999	-9999
2006	254	51600	52200	51900	36.9	6.75	-57.96	-57.68	-57.01	0.95	-9999	-9999	-9999
2006	254	52200	52800	52500	37.9	6.78	-58.08	-57.73	-57.03	1.05	-9999	-9999	-9999
2006	254	52800	53400	53100	37.5	6.84	-58.18	-57.82	-57.01	1.17	-9999	-9999	-9999
2006	254	53400	54000	53700	41.1	6.86	-58.27	-57.95	-57.19	1.08	-9999	-9999	-9999
2006	254	54000	54600	54300	46.2	6.57	-58.46	-58.24	-57.61	0.85	-9999	-9999	-9999
2006	254	54600	55200	54900	45.5	6.5	-58.46	-58.35	-57.76	0.7	-9999	-9999	-9999
2006	254	55200	55800	55500	41.4	6.69	-58.1	-57.95	-57.23	0.87	-9999	-9999	-9999
2006	254	55800	56400	56100	35.5	6.67	-57.89	-57.58	-56.77	1.12	-9999	-9999	-9999
2006	254	56400	57000	56700	33.5	6.25	-57.68	-57.29	-56.41	1.27	-9999	-9999	-9999
2006	254	57000	57600	57300	33	5.9	-57.54	-57.22	-56.58	0.96	-9999	-9999	-9999
2006	254	57600	58200	57900	28	6.77	-57.38	-57.14	-56.54	0.84	-9999	-9999	-9999
2006	254	58200	58800	58500	28.3	6.7	-57.52	-57.29	-56.6	0.92	-9999	-9999	-9999
2006	254	58800	59400	59100	29.1	6.24	-57.6	-57.3	-56.54	1.06	-9999	-9999	-9999
2006	254	59400	60000	59700	31	6.34	-57.49	-57.12	-56.18	1.31	-9999	-9999	-9999
2006	254	60000	60600	60300	32.9	5.96	-57.4	-56.95	-56.03	1.37	-9999	-9999	-9999
2006	254	60600	61200	60900	35.1	5.89	-57.21	-56.67	-55.81	1.4	-9999	-9999	-9999
2006	254	61200	61800	61500	46.5	5.31	-57.23	-56.72	-56.03	1.2	-9999	-9999	-9999
2006	254	61800	62400	62100	44.7	5.35	-57.26	-56.82	-56.09	1.17	-9999	-9999	-9999
2006	254	62400	63000	62700	42.6	5.74	-57.08	-56.67	-55.93	1.15	-9999	-9999	-9999
2006	254	63000	63600	63300	37.2	5.77	-57.02	-56.61	-55.84	1.18	-9999	-9999	-9999
2006	254	63600	64200	63900	34.4	6.17	-56.92	-56.55	-55.84	1.08	-9999	-9999	-9999
2006	254	64200	64800	64500	35.3	6.59	-56.98	-56.58	-55.92	1.06	-9999	-9999	-9999
2006	254	64800	65400	65100	34.9	7.03	-57.08	-56.69	-56.01	1.07	-9999	-9999	-9999
2006	254	65400	66000	65700	30.5	7.12	-56.84	-56.54	-55.82	1.02	-9999	-9999	-9999
2006	254	66000	66600	66300	32.4	7.14	-56.57	-56.32	-55.72	0.85	-9999	-9999	-9999
2006	254	66600	67200	66900	31.5	6.96	-56.46	-56.18	-55.56	0.9	-9999	-9999	-9999
2006	254	67200	67800	67500	32	7	-56.46	-56.17	-55.61	0.85	-9999	-9999	-9999
2006	254	67800	68400	68100	34.7	6.97	-56.4	-56.16	-55.62	0.78	-9999	-9999	-9999
2006	254	68400	69000	68700	33.1	7.57	-56.18	-56.02	-55.41	0.77	-9999	-9999	-9999
2006	254	69000	69600	69300	31.2	7.75	-55.84	-55.73	-55.17	0.67	-9999	-9999	-9999
2006	254	69600	70200	69900	27.2	7.51	-55.77	-55.65	-55.15	0.62	-9999	-9999	-9999
2006	254	70200	70800	70500	18.6	7.45	-55.73	-55.6	-55.16	0.57	-9999	-9999	-9999
2006	254	70800	71400	71100	15.2	8.16	-55.7	-55.6	-55.01	0.69	-9999	-9999	-9999
2006	254	71400	72000	71700	13.2	8.43	-55.64	-55.46	-54.89	0.75	-9999	-9999	-9999
2006	254	72000	72600	72300	12.9	8.72	-55.6	-55.4	-54.84	0.76	-9999	-9999	-9999
2006	254	72600	73200	72900	16.5714	8.88571	-55.6	-55.4	-54.8286	0.771429	-9999	-9999	-9999
2006	254	73200	73800	73500	19.7	8.82	-55.63	-55.45	-54.9	0.73	-9999	-9999	-9999
2006	254	73800	74400	74100	17.8	8.81	-55.58	-55.39	-54.84	0.74	-9999	-9999	-9999
2006	254	74400	75000	74700	21.9	8.71	-55.4	-55.29	-54.75	0.65	-9999	-9999	-9999
2006	254	75000	75600	75300	21.7	8.65	-55.41	-55.31	-54.85	0.56	-9999	-9999	-9999
2006	254	75600	76200	75900	17.3	8.49	-55.49	-55.34	-54.9	0.59	-9999	-9999	-9999
2006	254	76200	76800	76500	16.7	8.09	-55.64	-55.51	-55.11	0.53	-9999	-9999	-9999
2006	254	76800	77400	77100	18.2	7.85	-55.68	-55.6	-55.18	0.5	-9999	-9999	-9999
2006	254	77400	78000	77700	19.6	7.45	-55.51	-55.48	-55.04	0.47	-9999	-9999	-9999
2006	254	78000	78600	78300	25.3	6.99	-55.5	-55.4	-55.07	0.43	-9999	-9999	-9999
2006	254	78600	79200	78900	23.8	6.15	-55.52	-55.42	-55.1	0.42	-9999	-9999	-9999
2006	254	79200	79800	79500	30.4	6.3	-55.51	-55.4	-55.07	0.44	-9999	-9999	-9999
2006	254	79800	80400	80100	31.6	6.56	-55.5	-55.4	-55.1	0.4	-9999	-9999	-9999
2006	254	80400	81000	80700	29.2	6.96	-55.56	-55.4	-55.03	0.53	-9999	-9999	-9999
2006	254	81000	81600	81300	29.3	6.8	-55.59	-55.4	-55	0.59	-9999	-9999	-9999
2006	254	81600	82200	81900	29.1	6.76	-55.66	-55.48	-55.02	0.64	-9999	-9999	-9999
2006	254	82200	82800	82500	27	7.24	-55.7	-55.5	-54.97	0.73	-9999	-9999	-9999
2006	254	82800	83400	83100	26.9	7.29	-55.69	-55.49	-54.9	0.79	-9999	-9999	-9999
2006	254	83400	84000	83700	23	7.54	-55.73	-55.54	-54.98	0.75	-9999	-9999	-9999
2006	254	84000	84600	84300	22.2	7.73	-55.79	-55.6	-55.13	0.66	-9999	-9999	-9999
2006	254	84600	85200	84900	20.5	8.05	-55.73	-55.66	-55.2	0.53	-9999	-9999	-9999
2006	254	85200	85800	85500	18.9	8.17	-55.72	-55.62	-55.17	0.55	-9999	-9999	-9999
2006	254	85800.1	86400	86100	12.8995	8.55003	-55.78	-55.65	-55.2	0.580013	-9999	-9999	-9999
2006	255	0	600	300	11.9	8.52	-55.83	-55.7	-55.08	0.75	-9999	-9999	-9999
2006	255	600	1200	900	15.1	8.45	-55.79	-55.61	-54.92	0.87	-9999	-9999	-9999
2006	255	1200	1800	1500	15.4	8.24	-55.79	-55.6	-54.93	0.86	-9999	-9999	-9999
2006	255	1800	2400	2100	14	8.02	-55.8	-55.61	-54.99	0.81	-9999	-9999	-9999
2006	255	2400	3000	2700	12.7	7.73	-55.89	-55.69	-55.07	0.82	-9999	-9999	-9999
2006	255	3000	3600	3300	8.7	7.4	-55.9	-55.7	-55.1	0.8	-9999	-9999	36.5923
2006	255	3600	4200	3900	10	6.99	-55.9	-55.78	-55.19	0.71	-9999	-9999	37.469
2006	255	4200	4800	4500	16.9	6.32	-55.9	-55.8	-55.34	0.56	-9999	-9999	38.9205
2006	255	4800	5400	5100	24.8	5.74	-55.89	-55.82	-55.4	0.49	-9999	-9999	40.5336
2006	255	5400	6000	5700	25.6	6.04	-55.87	-55.8	-55.4	0.47	-9999	-9999	40.4733
2006	255	6000	6600	6300	25.4	6.42	-55.98	-55.87	-55.42	0.56	-9999	-9999	38.8325
2006	255	6600	7200	6900	24.2	6.32	-56.08	-55.94	-55.43	0.65	-9999	-9999	40.6062
2006	255	7200	7800	7500	22.3	6.17	-56.19	-56.01	-55.55	0.64	-9999	-9999	40.6902
2006	255	7800	8400	8100	22.4	6.3	-56.3	-56.08	-55.7	0.6	-9999	-9999	40.1494
2006	255	8400	9000	8700	14.7	6.73	-56.27	-56.04	-55.58	0.69	-9999	-9999	42.0142
2006	255	9000	9600	9300	15.1	6.61	-56.25	-56.05	-55.5	0.75	-9999	-9999	40.9556
2006	255	9600	10200	9900	22	7.01	-56.29	-56.09	-55.6	0.69	-9999	-9999	42.467
2006	255	10200	10800	10500	20.7	7.21	-56.24	-56.03	-55.55	0.69	-9999	-8.09983	42.3585
2006	255	10800	11400	11100	18	7.04	-56.19	-56	-55.6	0.59	-9999	-11.7419	42.8216
2006	255	11400	12000	11700	16.2	7.56	-56.19	-56.05	-55.57	0.62	-9999	-2.76399	44.3747
2006	255	12000	12600	12300	14.1	7.59	-56.2	-56.09	-55.57	0.63	2.35443	-4.41502	45.14
2006	255	12600	13200	12900	16.5	7.32	-56.2	-56.07	-55.68	0.52	1.86195	-10.8126	44.6837
2006	255	13200	13800	13500	16.8	7.65	-56.2	-56.04	-55.55	0.65	5.07129	-16.0149	45.5836
2006	255	13800	14400	14100	16.2	7.67	-56.22	-56	-55.56	0.66	0.533848	-5.83745	46.6665
2006	255	14400	15000	14700	15	8.02	-56.2	-55.99	-55.51	0.69	-0.328126	1.3796	47.0002
2006	255	15000	15600	15300	14.1	7.77	-56.21	-56.06	-55.51	0.7	0.68775	-6.11116	46.2885
2006	255	15600	16200	15900	14.5	7.32	-56.25	-56.1	-55.6	0.65	1.2956	-1.47739	48.7205
2006	255	16200	16800	16500	16.9	6.76	-56.26	-56.06	-55.6	0.66	1.99169	-0.150376	48.856
2006	255	16800	17400	17100	22.4	6.25	-56.22	-56.01	-55.57	0.65	1.18932	1.89861	50.9403
2006	255	17400	18000	17700	20.4	6.63	-56.16	-55.91	-55.42	0.74	1.66176	-3.79477	50.5789
2006	255	18000	18600	18300	28.7	6.23	-56.22	-55.95	-55.52	0.7	-9999	-9999	-9999
2006	255	18600	19200	18900	34.2	6.01	-56.24	-56	-55.65	0.59	-9999	-9999	-9999
2006	255	19200	19800	19500	32.4	6.23	-56.19	-55.91	-55.5	0.69	5.19548	-9999	-9999
2006	255	19800	20400	20100	22.2	6.95	-56.18	-55.92	-55.46	0.72	3.1923	0.427641	-9999
2006	255	20400	21000	20700	16.4	7.27	-56.13	-55.83	-55.24	0.89	0.619471	4.3436	-9999
2006	255	21000	21600	21300	21.3	6.86	-56.21	-55.93	-55.44	0.77	-1.97674	8.43725	-9999
2006	255	21600	22200	21900	30.7	6.68	-56.35	-56.12	-55.74	0.61	3.97574	-9999	52.1611
2006	255	22200	22800	22500	26.6	6.95	-56.4	-56.21	-55.79	0.61	2.55801	-2.03688	51.7776
2006	255	22800	23400	23100	16.5	7.43	-56.44	-56.16	-55.61	0.83	2.30051	-1.98077	50.3521
2006	255	23400	24000	23700	11.3	7.39	-56.44	-56.09	-55.42	1.02	3.19107	0.0325471	50.0425
2006	255	24000	24600	24300	17.1	7.4	-56.58	-56.13	-55.5	1.08	2.43751	3.8909	49.246
2006	255	24600	25200	24900	14.6	7.38	-56.78	-56.31	-55.55	1.23	0.271948	0.647666	50.5987
2006	255	25200	25800	25500	15	7.87	-56.9	-56.41	-55.44	1.46	0.865751	-0.796683	51.4497
2006	255	25800	26400	26100	17.5	7.97	-56.94	-56.48	-55.47	1.47	1.66227	-1.92741	52.7182
2006	255	26400	27000	26700	25.8	6.17	-57.08	-56.7	-55.94	1.14	1.59301	3.07918	51.6479
2006	255	27000	27600	27300	23.5	5.29	-57.3	-56.99	-56.45	0.85	-0.437894	-0.212647	50.0472
2006	255	27600	28200	27900	14.5	6.11	-57.5	-57.11	-56.39	1.11	-0.818808	3.0893	50.0077
2006	255	28200	28800	28500	9.8	7.34	-57.47	-57.03	-55.87	1.6	2.44303	-6.01296	48.7219
2006	255	28800	29400	29100	10.5	7.07	-57.42	-56.9	-55.71	1.71	0.699827	-4.87656	49.5331
2006	255	29400	30000	29700	21.7	5.48	-57.6	-57.11	-56.22	1.38	0.222165	-2.24679	50.9241
2006	255	30000	30600	30300	14.2	7.58	-57.72	-57.11	-55.89	1.83	1.53439	1.34539	50.4871
2006	255	30600	31200	30900	11.8	8.29	-57.82	-57.04	-55.62	2.2	3.17554	0.162627	50.3131
2006	255	31200	31800	31500	11.2	7.98	-58.03	-57.18	-55.56	2.47	1.12341	2.5209	48.3279
2006	255	31800	32400	32100	11.4	7.91	-58.15	-57.23	-55.74	2.41	2.40989	-7.59368	50.444
2006	255	32400	33000	32700	11.5	7.45	-58.26	-57.38	-55.7	2.56	1.20211	-5.16544	50.0779
2006	255	33000	33600	33300	18	6.47	-58.54	-57.67	-55.98	2.56	1.2597	-5.50125	50.51
2006	255	33600	34200	33900	44.9	4	-58.83	-58.1	-56.99	1.84	-0.180661	0.947326	49.8883
2006	255	34200	34800	34500	46.8	4.26	-58.85	-58.16	-57.4	1.45	1.90156	-1.9571	51.3649
2006	255	34800	35400	35100	56.4	3.29	-59.81	-58.51	-57.56	2.25	2.57057	-1.55138	51.1766
2006	255	35400	36000	35700	40.7	4.17	-59.6	-58.48	-57.57	2.03	1.1856	1.72953	49.7815
2006	255	36000	36600	36300	35.8	3.89	-59	-58.18	-57.42	1.58	0.112812	-0.603143	49.2407
2006	255	36600	37200	36900	35	4.58	-59.03	-58.14	-57.41	1.62	1.12983	0.555329	50.231
2006	255	37200	37800	37500	32.3	4.15	-59.09	-58.2	-57.46	1.63	2.31677	3.02697	50.9364
2006	255	37800	38400	38100	33.4	4.43	-58.94	-58.09	-57.45	1.49	2.89371	-1.59021	51.5877
2006	255	38400	39000	38700	30.1	4.97	-58.9	-58	-57.32	1.58	1.90528	-7.14685	51.0341
2006	255	39000	39600	39300	31.9	5.26	-59.01	-57.99	-57.3	1.71	0.239862	-0.805456	48.0872
2006	255	39600	40200	39900	40.1	5.5	-59	-58.01	-57.27	1.73	-0.232229	0.101485	48.9667
2006	255	40200	40800	40500	38.6	5.13	-58.96	-57.95	-57.09	1.87	1.12586	5.43208	51.4829
2006	255	40800	41400	41100	42.3	5.2	-59.45	-58.2	-57.17	2.28	2.62649	-0.127514	50.1737
2006	255	41400	42000	41700	33	5.09	-59.4	-58.33	-57.16	2.24	2.80358	-3.23357	50.2031
2006	255	42000	42600	42300	21.7	4.83	-59.02	-58.17	-57	2.02	1.45527	-0.0128953	51.5733
2006	255	42600	43200	42900	33.8	3.6	-59.18	-58.48	-57.54	1.64	1.87703	-2.6923	51.9821
2006	255	43200	43800	43500	32.7	4.08	-59.14	-58.54	-57.72	1.42	2.11572	-0.582759	49.8071
2006	255	43800	44400	44100	25.4	5.07	-58.85	-58.17	-57.2	1.65	1.11557	-2.71346	49.6489
2006	255	44400	45000	44700	24.2	4.86	-58.65	-58.03	-57	1.65	0.748195	1.3163	50.5854
2006	255	45000	45600	45300	31.7	4.44	-58.68	-58.17	-57.39	1.29	1.22352	-8.73182	47.5985
2006	255	45600	46200	45900	35	4.42	-58.79	-58.22	-57.43	1.36	2.60982	-5.16293	49.3782
2006	255	46200	46800	46500	47.8	2.96	-59.45	-58.38	-57.72	1.73	3.71413	0.45823	52.4483
2006	255	46800	47400	47100	33.6	3.99	-59.74	-58.35	-57.47	2.27	0.728945	-4.27783	46.5971
2006	255	47400	48000	47700	29.5	4.47	-58.97	-58.15	-57.22	1.75	1.27233	-9.35698	49.1156
2006	255	48000	48600	48300	24.6	4.19	-58.68	-58.02	-57.13	1.55	3.73344	1.22299	50.9585
2006	255	48600	49200	48900	31.1	4.34	-58.77	-58.11	-57.22	1.55	-0.29523	1.91567	49.2882
2006	255	49200	49800	49500	37.5	4.28	-58.87	-58.25	-57.45	1.42	1.39034	-0.53935	49.3576
2006	255	49800	50400	50100	26.6	4	-58.85	-58.24	-57.25	1.6	3.7395	-7.03451	51.044
2006	255	50400	51000	50700	28.9	4.32	-58.91	-58.26	-57.05	1.86	1.03673	-1.24624	49.1758
2006	255	51000	51600	51300	34.7	4.51	-59.23	-58.42	-57.21	2.02	-0.534737	-1.03825	49.5943
2006	255	51600	52200	51900	31.8	3.99	-59.35	-58.51	-57.27	2.08	2.75666	-0.420244	50.1943
2006	255	52200	52800	52500	27.3	4.76	-59.47	-58.51	-56.69	2.78	0.309387	4.30431	49.5837
2006	255	52800	53400	53100	16.5	5.8	-59.35	-58.23	-56.19	3.16	0.341238	-3.76447	47.4513
2006	255	53400	54000	53700	21.6	5.23	-59.48	-58.28	-56.19	3.29	1.04743	-1.58809	47.6187
2006	255	54000	54600	54300	51.5	3.85	-60.48	-59	-57.35	3.13	2.25625	-3.28566	50.3276
2006	255	54600	55200	54900	51.9	4.04	-62.01	-59.98	-58.44	3.57	0.171368	-10.9775	50.2815
2006	255	55200	55800	55500	46.8	4.52	-60.21	-59.64	-58.49	1.72	0.2863	-7.60984	50.2185
2006	255	55800	56400	56100	35.9	5.39	-59.82	-59.47	-58.37	1.45	-0.0933004	-0.140481	49.5525
2006	255	56400	57000	56700	20.6	6.46	-59.24	-58.76	-55.98	3.26	0.94744	-3.55114	49.1569
2006	255	57000	57600	57300	23.3	6.52	-58.94	-58.26	-55.62	3.32	1.11093	1.86052	49.5253
2006	255	57600	58200	57900	25	6.11	-58.77	-58.18	-56.32	2.45	-9999	-9999	-9999
2006	255	58200	58800	58500	23	5.58	-58.55	-58.07	-56.88	1.67	-9999	-9999	-9999
2006	255	58800	59400	59100	18.8	5.57	-58.42	-58.01	-56.91	1.51	2.16397	-9999	-9999
2006	255	59400	60000	59700	15.6	5.46	-58.25	-57.74	-56.42	1.83	0.883712	2.48027	-9999
2006	255	60000	60600	60300	22.2	4.9	-58.24	-57.71	-56.45	1.79	0.417884	-2.1943	-9999
2006	255	60600	61200	60900	38.3	3.65	-58.4	-57.94	-57.1	1.3	-3.87747	2.27494	-9999
2006	255	61200	61800	61500	42.8	2.78	-58.55	-58.22	-57.56	0.99	3.5069	-9999	-9999
2006	255	61800	62400	62100	45.2	2.81	-58.61	-58.29	-57.56	1.05	2.38451	-1.9723	50.2153
2006	255	62400	63000	62700	44.3	2.62	-58.78	-58.42	-57.6	1.18	3.82165	-4.19968	53.3805
2006	255	63000	63600	63300	44.1	2.63	-59.78	-58.64	-57.82	1.96	6.04773	-4.16007	53.9466
2006	255	63600	64200	63900	43.8	3.48	-58.92	-58.64	-57.78	1.14	2.01516	-1.55593	52.1644
2006	255	64200	64800	64500	38.9	3.81	-58.56	-58.41	-57.61	0.95	2.32217	2.13002	51.8648
2006	255	64800	65400	65100	32.5	4.26	-58.32	-58.14	-57.42	0.9	1.04641	-3.15405	49.9521
2006	255	65400	66000	65700	29.5	4.44	-58.21	-58.02	-57.4	0.81	2.63506	1.66737	48.8037
2006	255	66000	66600	66300	28.8	4.04	-58.2	-57.93	-57.31	0.89	2.09056	-0.337022	47.8746
2006	255	66600	67200	66900	27.6	3.12	-58.12	-57.83	-57.3	0.82	3.6935	-3.46799	52.4479
2006	255	67200	67800	67500	43.7	3.24	-58.26	-57.92	-57.46	0.8	1.80918	4.43202	49.3109
2006	255	67800	68400	68100	49.3	3.06	-58.39	-58.22	-57.8	0.59	2.40733	5.03894	54.7063
2006	255	68400	69000	68700	45.9	3.04	-58.29	-58.19	-57.7	0.59	5.67702	0.916437	53.4839
2006	255	69000	69600	69300	44.2	2.99	-58.07	-57.96	-57.47	0.6	1.39904	-3.10573	50.6412
2006	255	69600	70200	69900	42	2.68	-57.86	-57.83	-57.36	0.5	2.05632	9.29402	53.0397
2006	255	70200	70800	70500	43.2	2.9	-57.67	-57.66	-57.34	0.33	2.46795	-3.63677	50.0908
2006	255	70800	71400	71100	39.9	3.27	-57.38	-57.39	-57.03	0.35	2.39929	3.59123	50.747
2006	255	71400	72000	71700	38	3.57	-57.03	-57.05	-56.77	0.26	2.60711	3.08416	51.586
2006	255	72000	72600	72300	33.5	3.34	-56.79	-56.83	-56.58	0.21	2.40731	-0.955901	50.473
2006	255	72600	73200	72900	33.1	3.31	-56.66	-56.7	-56.44	0.22	1.96946	4.3168	49.6566
2006	255	73200	73800	73500	30.3	3.38	-56.5	-56.53	-56.3	0.2	2.90228	-4.96587	49.014
2006	255	73800	74400	74100	31.5	3.12	-56.37	-56.41	-56.21	0.16	1.04219	-1.36047	49.0069
2006	255	74400	75000	74700	37.8	3.16	-56.3	-56.31	-56.12	0.18	3.24294	4.02442	49.5421
2006	255	75000	75600	75300	38.7	3.12	-56.21	-56.25	-56	0.21	3.97328	-0.340159	48.4416
2006	255	75600	76200	75900	35	2.7	-56.25	-56.23	-55.95	0.3	4.09027	-4.35205	51.3113
2006	255	76200	76800	76500	33.5	2.6	-56.11	-56.15	-55.82	0.29	3.64462	1.27266	51.3899
2006	255	76800	77400	77100	36.5	2.25	-56.15	-56.14	-55.9	0.25	5.74808	-3.12514	52.7654
2006	255	77400	78000	77700	35.9	2.45	-56.1	-56.09	-55.85	0.25	3.39214	-0.281261	53.796
2006	255	78000	78600	78300	37.3	2.52	-56.1	-56.07	-55.85	0.25	2.39955	1.95731	52.1876
2006	255	78600	79200	78900	42	2.38	-56.18	-56.11	-55.83	0.35	4.24282	-3.704	52.4824
2006	255	79200	79800	79500	48.8	1.6	-56.71	-56.41	-56.02	0.69	5.73819	-8.12424	51.6194
2006	255	79800	80400	80100	57.5	1.81	-57.44	-57.23	-56.43	1.01	2.35039	-4.55498	50.1936
2006	255	80400	81000	80700	59	1.84	-57.54	-57.4	-56.71	0.83	3.55524	-3.4939	50.8453
2006	255	81000	81600	81300	59	1.62	-57.48	-57.42	-56.78	0.7	5.74302	6.45936	52.6436
2006	255	81600	82200	81900	59	1.28	-57.55	-57.46	-56.72	0.83	6.35592	4.56042	59.0661
2006	255	82200	82800	82500	62	1.26	-57.78	-57.64	-56.52	1.26	2.64893	4.51015	56.1638
2006	255	82800	83400	83100	73.8	1.91	-57.93	-57.98	-56.81	1.12	3.13677	-0.10379	50.8302
2006	255	83400	84000	83700	74	2.14	-57.86	-58.03	-57.16	0.7	1.79561	0.501662	50.1571
2006	255	84000	84600	84300	72.9	2.26	-57.8	-57.98	-57.17	0.63	4.3395	-3.0409	49.4184
2006	255	84600	85200	84900	70.8	2.5	-57.65	-57.85	-57.09	0.56	2.36561	3.10961	50.0705
2006	255	85200	85800	85500	61	2.51	-57.49	-57.67	-56.84	0.65	1.89449	-0.197336	51.8721
2006	255	85800.1	86400	86100	50.3996	2.44006	-57.21	-57.33	-56.1399	1.07003	3.6532	0.594287	54.0865
2006	256	0	600	300	46.7	2.82	-56.8	-56.87	-55.31	1.49	-9999	-9999	50.855
2006	256	600	1200	900	44.8	2.72	-56.36	-56.38	-55.21	1.15	2.6697	-4.21472	53.8963
2006	256	1200	1800	1500	48.1	2.74	-56.23	-56.11	-55.11	1.12	3.81553	-6.60566	52.6695
2006	256	1800	2400	2100	42.1	2.8	-55.91	-55.76	-54.87	1.04	3.74711	-0.33179	52.7735
2006	256	2400	3000	2700	40.1	2.83	-55.71	-55.58	-54.79	0.92	4.48717	-3.44618	54.8641
2006	256	3000	3600	3300	51.4	2.8	-55.64	-55.46	-54.67	0.97	3.39646	-5.13572	51.8456
2006	256	3600	4200	3900	51.6	2.13	-55.79	-55.6	-54.77	1.02	2.68774	-2.86545	53.8142
2006	256	4200	4800	4500	42.4	2.32	-55.82	-55.52	-54.75	1.07	4.2908	1.52438	55.2962
2006	256	4800	5400	5100	40.9	2.82	-55.86	-55.55	-54.78	1.08	4.41561	0.950184	55.1737
2006	256	5400	6000	5700	45.4	2.56	-56	-55.61	-54.69	1.31	3.21614	1.2533	53.7121
2006	256	6000	6600	6300	32.2	2.79	-56.14	-55.48	-54.53	1.61	4.62199	-4.57977	55.3465
2006	256	6600	7200	6900	23.4	3.34	-56.35	-55.26	-54.4	1.95	3.73793	3.73359	53.3951
2006	256	7200	7800	7500	28.4	3.64	-56.62	-55.24	-54.32	2.3	4.81275	-2.16783	54.2504
2006	256	7800	8400	8100	38.1	3.16	-57.11	-55.55	-54.37	2.74	2.05304	-6.50633	49.7623
2006	256	8400	9000	8700	41.3	2.72	-58.02	-55.93	-54.41	3.61	1.87248	6.55685	54.4225
2006	256	9000	9600	9300	38.4	2.91	-58.45	-56.18	-54.34	4.11	3.77358	-5.45166	53.9103
2006	256	9600	10200	9900	30.8	2.88	-58.47	-56.12	-54.37	4.1	4.94725	-0.617918	56.0542
2006	256	10200	10800	10500	32.2	1.46	-58.7	-56.54	-55.02	3.68	5.84424	2.11042	57.7726
2006	256	10800	11400	11100	32.7	1.24	-58.91	-56.7	-55.1	3.81	-9999	-9999	-9999
2006	256	11400	12000	11700	27	2.04	-59.02	-56.31	-54.74	4.28	-9999	-9999	-9999
2006	256	12000	12600	12300	23.7	2.32	-59.11	-55.99	-54.45	4.66	9.21959	-9999	70.8205
2006	256	12600	13200	12900	28.4	2.18	-59.32	-56.19	-54.46	4.86	7.02992	12.174	-9999
2006	256	13200	13800	13500	39.3	2.07	-59.54	-56.69	-54.65	4.89	6.96259	2.54297	-9999
2006	256	13800	14400	14100	44.1	1.62	-59.65	-56.91	-54.78	4.87	4.6708	-1.55675	-9999
2006	256	14400	15000	14700	41.8	1.6	-59.72	-56.48	-54.64	5.08	2.90781	-9999	59.8576
2006	256	15000	15600	15300	39.4	2.33	-59.74	-56.23	-54.44	5.3	5.17546	3.41198	54.749
2006	256	15600	16200	15900	69	2.63	-59.64	-57.41	-54.48	5.16	1.31185	6.83467	54.0377
2006	256	16200	16800	16500	70.5	2.69	-59.5	-58.35	-54.52	4.98	1.31247	5.94805	54.2398
2006	256	16800	17400	17100	78	3.08	-59.45	-59.33	-54.71	4.74	0.38563	4.09537	51.7598
2006	256	17400	18000	17700	73.1	3.1	-59.41	-59.29	-54.21	5.2	3.43623	1.68393	53.325
2006	256	18000	18600	18300	68.2	2.89	-59.41	-59.21	-53.71	5.7	2.30153	5.05046	54.8473
2006	256	18600	19200	18900	65.8	3.12	-59.4	-59.32	-53.7	5.7	2.25878	1.69205	55.4669
2006	256	19200	19800	19500	50.5	2.99	-59.28	-58.37	-53.21	6.07	1.10603	2.05461	58.1387
2006	256	19800	20400	20100	49.1	2.78	-58.97	-57.29	-53.01	5.96	2.68234	0.75571	59.1673
2006	256	20400	21000	20700	36.5	2.73	-59.05	-56.37	-52.8	6.25	5.25233	-0.962747	59.4128
2006	256	21000	21600	21300	28.2	2.85	-58.94	-55.55	-52.8	6.14	5.63106	-1.1056	60.1471
2006	256	21600	22200	21900	31.3	2.75	-58.77	-55.68	-53.03	5.74	5.23349	-3.41903	59.8791
2006	256	22200	22800	22500	27.5	2.61	-58.6	-55.37	-52.33	6.27	5.74466	-1.53903	59.7164
2006	256	22800	23400	23100	15.9	3.36	-58.05	-54.33	-50.96	7.09	4.68729	4.74413	55.3568
2006	256	23400	24000	23700	26.1	3.55	-57.86	-54.54	-51.2	6.66	5.63058	2.46961	56.3502
2006	256	24000	24600	24300	28.2	3.09	-58.29	-55.57	-52.05	6.24	6.78813	0.514	58.3407
2006	256	24600	25200	24900	22.2	2.19	-58.37	-55.4	-53.21	5.16	6.42949	-1.44367	58.8732
2006	256	25200	25800	25500	15.4	1.67	-58.27	-55.67	-53.93	4.34	6.07329	0.263744	60.823
2006	256	25800	26400	26100	26.4286	1.3	-58.4857	-55.886	-54.3143	4.17143	7.23639	-5.03567	63.2805
2006	256	26400	27000	26700	29	2.01	-58.35	-55.68	-54.25	4.1	6.48474	6.3159	61.9827
2006	256	27000	27600	27300	33.5	1.33	-58.32	-56.17	-54.19	4.13	7.2913	5.36769	60.5346
2006	256	27600	28200	27900	18.7	2.05	-58.32	-55.29	-53.9	4.42	7.06071	2.28288	58.6532
2006	256	28200	28800	28500	30.9	1.79	-58.41	-55.08	-53.53	4.88	6.3222	0.540562	59.0642
2006	256	28800	29400	29100	37.5	2.04	-58.8	-54.85	-52.19	6.61	6.38559	3.89494	60.8
2006	256	29400	30000	29700	38	2.28	-59.07	-54.94	-52.46	6.61	5.3336	5.71586	60.419
2006	256	30000	30600	30300	50.5	2.54	-59.23	-55.43	-52.81	6.42	3.61974	0.715882	54.1737
2006	256	30600	31200	30900	48.7	2.71	-59.43	-55.6	-52.78	6.65	3.57741	1.99923	56.9827
2006	256	31200	31800	31500	42.9	3.11	-59.62	-54.9	-52.91	6.71	3.02279	-3.00771	52.354
2006	256	31800	32400	32100	42.6	3.14	-59.76	-55.08	-52.75	7.01	4.84442	-4.72607	53.4374
2006	256	32400	33000	32700	38	2.94	-59.83	-55.38	-52.78	7.05	2.62091	6.07539	57.0181
2006	256	33000	33600	33300	34.7	3.37	-60.04	-54.97	-52.8	7.24	4.42066	-2.97168	54.9775
2006	256	33600	34200	33900	20.5	4.27	-59.85	-53.63	-52.12	7.73	4.77467	-1.84839	53.477
2006	256	34200	34800	34500	17.3	4.19	-59.94	-53.87	-51.68	8.26	4.49149	-0.562863	53.4704
2006	256	34800	35400	35100	11.7	4.57	-58.79	-53.5	-51.04	7.75	3.84183	-4.12738	50.4338
2006	256	35400	36000	35700	10.2	4.96	-57.35	-53.33	-50.01	7.34	2.52766	-4.02958	48.2927
2006	256	36000	36600	36300	9.3	4.8	-56.79	-53.38	-49.39	7.4	1.40614	-2.65796	48.4193
2006	256	36600	37200	36900	8.3	4.17	-56.89	-53.56	-49.55	7.34	4.15535	3.66509	52.6232
2006	256	37200	37800	37500	19.2	4.1	-58.11	-53.77	-50.18	7.93	4.39087	-5.01288	52.6828
2006	256	37800	38400	38100	11	3.81	-57.95	-53.61	-50.21	7.74	3.51423	-6.26823	51.5849
2006	256	38400	39000	38700	7.5	3.92	-58.34	-53.49	-50.14	8.2	2.6681	-1.33365	51.2762
2006	256	39000	39600	39300	11.8	3.65	-58.74	-53.54	-50.1	8.64	5.02635	2.3752	53.8551
2006	256	39600	40200	39900	21.2	3.3	-60.5	-53.79	-50.42	10.08	6.07424	0.18596	52.794
2006	256	40200	40800	40500	25.3	3.44	-61.34	-53.87	-50.06	11.28	3.72811	3.80748	53.3477
2006	256	40800	41400	41100	21.4	3.17	-60.99	-53.67	-50.26	10.73	5.71538	-1.11798	53.1416
2006	256	41400	42000	41700	14.3	3.23	-61.25	-53.65	-50.54	10.71	4.10343	1.01464	55.2505
2006	256	42000	42600	42300	7	3.67	-60.32	-53.12	-50.33	9.99	8.91639	-6.20895	53.8697
2006	256	42600	43200	42900	8.1	3.87	-59.86	-53.34	-49.65	10.21	5.71057	-6.51861	51.2774
2006	256	43200	43800	43500	13.8	3.81	-59.6	-54.24	-50.01	9.59	4.08646	-4.48973	50.3602
2006	256	43800	44400	44100	14.1	4.29	-58.69	-54.45	-50.23	8.46	3.99953	-0.0846605	50.6391
2006	256	44400	45000	44700	18.3	3.88	-57.7	-55.01	-50.61	7.09	5.85467	-9.11102	49.7655
2006	256	45000	45600	45300	24.9	3.13	-57.9	-55.13	-51.18	6.72	6.36456	-2.78992	54.5991
2006	256	45600	46200	45900	33.4	3.08	-60.51	-55.24	-50.53	9.98	5.85771	-6.36045	55.1331
2006	256	46200	46800	46500	25.6	3.38	-60.55	-54.57	-50.12	10.43	4.95753	1.14746	54.7069
2006	256	46800	47400	47100	12.3	3.71	-59.44	-53.61	-49.07	10.37	4.14004	-2.66076	50.4613
2006	256	47400	48000	47700	7.4	3.72	-57.6	-53.55	-48.77	8.83	4.82652	-3.72107	53.2454
2006	256	48000	48600	48300	11.3	3.45	-57.82	-53.77	-48.76	9.06	4.33138	2.75264	52.3529
2006	256	48600	49200	48900	17.8	3.63	-57.69	-54.04	-48.82	8.87	4.18643	1.41249	52.9914
2006	256	49200	49800	49500	12.6	3.99	-56.55	-54.07	-48.8	7.75	2.95609	3.17696	51.3645
2006	256	49800	50400	50100	6.1	4.04	-56.03	-53.72	-48.27	7.76	2.81181	4.65928	51.7349
2006	256	50400	51000	50700	3	3.98	-56.04	-53.84	-48.38	7.66	-9999	-9999	-9999
2006	256	51000	51600	51300	358	3.95	-56.04	-53.91	-48.55	7.49	-9999	-9999	-9999
2006	256	51600	52200	51900	357.4	3.66	-56.36	-54.23	-49.64	6.72	8.87055	-9999	-9999
2006	256	52200	52800	52500	5.8	2.94	-56.88	-55.15	-52.25	4.63	6.21458	-0.482214	-9999
2006	256	52800	53400	53100	11.4	3.19	-56.65	-54.93	-51.52	5.13	7.35636	3.97985	-9999
2006	256	53400	54000	53700	6.2	3.26	-56.79	-54.64	-50.7	6.09	3.96557	-0.178361	-9999
2006	256	54000	54600	54300	355.1	3.75	-56.48	-54.21	-50.61	5.87	4.41053	-9999	54.7428
2006	256	54600	55200	54900	348.9	4.47	-56.16	-53.74	-50.31	5.85	4.44856	-3.21494	52.3492
2006	256	55200	55800	55500	344.7	4.26	-56.09	-53.15	-50.17	5.92	3.94336	1.68054	53.583
2006	256	55800	56400	56100	356.5	3.88	-56.55	-54.37	-50.96	5.59	3.34896	4.96703	52.8838
2006	256	56400	57000	56700	354.7	3.79	-57.08	-54.68	-51.08	6	4.27366	3.41863	54.7075
2006	256	57000	57600	57300	346	4.69	-57.14	-53.71	-50.33	6.81	4.33507	2.16178	49.3375
2006	256	57600	58200	57900	341.4	5.34	-57	-52.73	-49.8	7.2	4.43058	-0.297842	49.886
2006	256	58200	58800	58500	342.9	5.37	-56.95	-53.28	-49.69	7.26	4.97711	-3.25983	49.6125
2006	256	58800	59400	59100	341.9	4.89	-57.22	-53.39	-50.01	7.21	3.2259	-1.6252	50.4255
2006	256	59400	60000	59700	352.2	4.46	-57.45	-54.22	-50.82	6.63	3.00092	0.867879	52.2351
2006	256	60000	60600	60300	17.9	4.38	-57.45	-54.95	-51.76	5.69	2.78756	2.77381	51.001
2006	256	60600	61200	60900	71.9	2.99	-58.65	-57.14	-54.8	3.85	4.07246	2.00227	51.1573
2006	256	61200	61800	61500	62.6	3.03	-60.1	-57.9	-55.28	4.82	3.74349	0.933036	50.3317
2006	256	61800	62400	62100	41.7	3.33	-59.94	-57.29	-54.12	5.82	4.93824	-1.4191	52.2237
2006	256	62400	63000	62700	30.4	3.42	-59.3	-56.49	-53.85	5.45	4.03964	1.02585	53.5913
2006	256	63000	63600	63300	22.5	3.74	-58.53	-56.62	-54.31	4.22	4.52976	-0.099359	53.0588
2006	256	63600	64200	63900	8.8	5.16	-57.6	-55.97	-54.22	3.38	2.37619	1.26021	49.21
2006	256	64200	64800	64500	1.9	6.12	-57.19	-55.65	-53.87	3.32	1.55003	1.45167	46.372
2006	256	64800	65400	65100	358	6.88	-57.13	-56.21	-54.22	2.91	0.745464	3.44642	47.1795
2006	256	65400	66000	65700	359.7	6.76	-57.31	-56.82	-54.73	2.58	1.08594	-0.891981	47.1937
2006	256	66000	66600	66300	357.8	7.03	-57.64	-57.36	-54.43	3.21	0.906561	1.45485	48.2928
2006	256	66600	67200	66900	353.1	7.07	-57.89	-57.61	-54.33	3.56	1.56001	0.0110828	46.416
2006	256	67200	67800	67500	351.2	6.47	-58.1	-57.85	-55.29	2.81	0.916103	-5.12479	48.3658
2006	256	67800	68400	68100	351.8	5.56	-58.3	-58.19	-55.97	2.33	1.78699	-3.09918	50.1035
2006	256	68400	69000	68700	347	5.3	-58.41	-58.33	-55.92	2.49	1.05253	-1.51652	49.5353
2006	256	69000	69600	69300	348.4	4.4	-58.54	-58.42	-56.13	2.41	2.27353	1.11228	47.6984
2006	256	69600	70200	69900	354.8	2.99	-58.57	-58.36	-56.78	1.79	2.74835	-2.49185	49.8152
2006	256	70200	70800	70500	354.7	4.1	-58.44	-58.18	-56.28	2.16	4.78893	-8.69276	50.6795
2006	256	70800	71400	71100	359.5	4.87	-58.53	-58.43	-56.36	2.17	2.05427	0.606228	50.6217
2006	256	71400	72000	71700	7.8	4.4	-58.45	-58.47	-56.86	1.59	1.65005	0.866501	50.9518
2006	256	72000	72600	72300	6.6	5.24	-58.36	-58.4	-56.92	1.44	1.38712	2.5323	47.9624
2006	256	72600	73200	72900	3.4	5.33	-58.26	-58.3	-56.57	1.69	2.4966	3.72409	48.203
2006	256	73200	73800	73500	358.1	5.12	-58.2	-58.27	-56.55	1.65	2.57556	-4.08822	49.8851
2006	256	73800	74400	74100	1	4.76	-58.26	-58.38	-56.76	1.5	2.15259	-4.71645	49.4232
2006	256	74400	75000	74700	1.5	4.77	-58.3	-58.48	-57.14	1.16	0.641209	-3.47717	50.2005
2006	256	75000	75600	75300	4.4	4.99	-58.3	-58.55	-57.93	0.37	0.633097	-3.76185	48.7919
2006	256	75600	76200	75900	6.9	4.54	-58.3	-58.52	-58.27	0.03	3.33465	-7.55296	53.0439
2006	256	76200	76800	76500	8.5	3.98	-58.16	-58.43	-58.07	0.09	1.49744	-2.31976	51.2535
2006	256	76800	77400	77100	7.5	3.81	-58	-58.25	-57.69	0.31	3.03246	2.77564	53.3256
2006	256	77400	78000	77700	14.4	2.47	-57.84	-58.1	-57.97	-0.13	-2.17476	0.872277	52.4427
2006	256	78000	78600	78300	3.4	2.66	-57.7	-57.98	-57.8	-0.1	-9999	-9999	52.6169
2006	256	78600	79200	78900	1	2.48	-57.58	-57.82	-57.67	-0.09	-9999	-9999	49.563
2006	256	79200	79800	79500	9.7	2.39	-57.38	-57.64	-57.57	-0.19	2.61761	-8.16349	50.9589
2006	256	79800	80400	80100	10.5	2.49	-57.18	-57.41	-57.33	-0.15	1.42268	-5.72269	52.0714
2006	256	80400	81000	80700	17.6	2.26	-56.94	-57.21	-57.14	-0.2	1.52771	-5.8335	49.7558
2006	256	81000	81600	81300	9.1	2.62	-57.04	-57.33	-57.26	-0.22	3.56791	-2.26349	50.4265
2006	256	81600	82200	81900	0.5	2.57	-57.07	-57.35	-57.3	-0.23	3.9181	2.29216	50.1031
2006	256	82200	82800	82500	11.7	2.44	-57.09	-57.39	-57.3	-0.21	3.04577	-5.0446	50.3182
2006	256	82800	83400	83100	0.4	2.92	-57.09	-57.38	-57.33	-0.24	4.3391	-1.1514	51.119
2006	256	83400	84000	83700	0.9	2.75	-57.18	-57.43	-57.4	-0.22	2.31378	-3.0797	50.3783
2006	256	84000	84600	84300	26.6	2.65	-57.2	-57.5	-57.44	-0.24	-0.780798	0.843973	49.1335
2006	256	84600	85200	84900	13.8	3.26	-57.29	-57.6	-57.55	-0.26	0.745171	0.755859	47.8671
2006	256	85200	85800	85500	10	3.63	-57.45	-57.75	-57.67	-0.22	1.80567	-3.23105	49.1636
2006	256	85800.1	86400	86100	8.44508	3.66668	-57.6222	-57.9	-57.8667	-0.244453	1.50481	-4.77077	50.6873
2006	257	0	600	300	13.3333	3.61667	-57.8	-58.067	-58.0333	-0.233333	1.78558	0.453545	49.507
2006	257	600	1200	900	4.3	4.03	-57.87	-58.18	-58.13	-0.26	1.32039	-0.199894	48.9911
2006	257	1200	1800	1500	358.4	3.97	-57.88	-58.18	-58.13	-0.25	0.494066	-1.31762	48.8853
2006	257	1800	2400	2100	12.9	3.62	-57.94	-58.22	-58.16	-0.22	2.30028	-4.5732	49.0272
2006	257	2400	3000	2700	3.8	3.96	-58.02	-58.3	-58.27	-0.25	1.88993	-2.89044	48.4021
2006	257	3000	3600	3300	2	3.83	-58.13	-58.4	-58.34	-0.21	0.233084	1.65554	49.3892
2006	257	3600	4200	3900	355.9	4.43	-58.3	-58.55	-58.48	-0.18	-9999	-9999	-9999
2006	257	4200	4800	4500	352.5	4.51	-58.49	-58.74	-58.69	-0.2	-9999	-9999	-9999
2006	257	4800	5400	5100	352.3	4.15	-58.66	-58.9	-58.85	-0.19	3.7656	-9999	-9999
2006	257	5400	6000	5700	351.2	4.2	-58.8	-59	-58.97	-0.17	0.985543	9.78057	-9999
2006	257	6000	6600	6300	351.7	4	-58.8	-59.08	-59	-0.2	2.8449	5.12039	-9999
2006	257	6600	7200	6900	349	3.98	-58.82	-59.1	-59	-0.18	-1.18169	1.80187	-9999
2006	257	7200	7800	7500	345.8	3.87	-58.8	-59.02	-58.96	-0.16	-0.278967	-9999	51.5945
2006	257	7800	8400	8100	349.2	3.56	-58.8	-59	-58.94	-0.14	3.07559	-5.95424	53.9055
2006	257	8400	9000	8700	338.2	3.37	-58.78	-58.98	-58.9	-0.12	1.94392	3.56953	55.4486
2006	257	9000	9600	9300	340.4	2.85	-58.79	-58.99	-58.9	-0.11	2.60499	1.08414	55.0395
2006	257	9600	10200	9900	352.8	2.52	-58.81	-59	-58.92	-0.11	2.84356	3.95438	52.6342
2006	257	10200	10800	10500	2.7	2.54	-58.9	-59.04	-59	-0.1	1.6045	1.69034	51.841
2006	257	10800	11400	11100	11.9	2.49	-59.04	-59.16	-59.08	-0.04	3.68224	4.21172	50.7523
2006	257	11400	12000	11700	15.4	2.57	-59.19	-59.3	-59.19	0	2.43627	8.62772	51.8352
2006	257	12000	12600	12300	19.9	2.52	-59.26	-59.41	-59.29	-0.03	2.21468	4.10992	53.9027
2006	257	12600	13200	12900	24.5	2.88	-59.38	-59.47	-59.38	0	2.53187	-4.39693	50.4767
2006	257	13200	13800	13500	30.4	2.87	-59.4	-59.54	-59.4	0	2.15982	-1.63639	51.1299
2006	257	13800	14400	14100	29.8	2.92	-59.41	-59.55	-59.4	0.01	2.8906	-0.724992	52.8664
2006	257	14400	15000	14700	36.2	2.84	-59.59	-59.67	-59.48	0.11	1.06709	2.38563	55.7471
2006	257	15000	15600	15300	40	2.62	-59.75	-59.84	-59.66	0.09	1.50224	2.64348	56.1147
2006	257	15600	16200	15900	33	2.72	-59.85	-59.96	-59.71	0.14	2.23589	5.6116	54.4131
2006	257	16200	16800	16500	34.1	2.76	-59.9	-60.01	-59.77	0.13	3.50685	-1.51287	53.7984
2006	257	16800	17400	17100	28.6	2.77	-59.9	-60.02	-59.86	0.04	2.76936	-4.80204	51.9815
2006	257	17400	18000	17700	39.1	3.14	-60.01	-60.09	-59.91	0.1	2.51634	-1.59695	50.1351
2006	257	18000	18600	18300	39.7	3.28	-60.17	-60.19	-60.03	0.14	1.85258	-1.18306	51.8709
2006	257	18600	19200	18900	42.9	3.39	-60.43	-60.38	-60.19	0.24	0.705714	-2.15644	51.3972
2006	257	19200	19800	19500	37.4	3.52	-60.7	-60.59	-60.35	0.35	2.65278	1.12892	51.1343
2006	257	19800	20400	20100	33.3	3.62	-60.92	-60.74	-60.43	0.49	1.6162	-0.231553	50.9221
2006	257	20400	21000	20700	32.1	3.87	-61.04	-60.9	-60.57	0.47	1.51528	-3.20671	48.8472
2006	257	21000	21600	21300	33.1	4.08	-61.09	-61	-60.6	0.49	2.96677	-1.40573	50.2059
2006	257	21600	22200	21900	34.6	4.27	-61.26	-61.09	-60.65	0.61	-0.510306	-5.2305	49.1899
2006	257	22200	22800	22500	32.1	4.48	-61.38	-61.22	-60.78	0.6	-0.514353	-5.70208	51.0705
2006	257	22800	23400	23100	37.9	4.05	-61.5	-61.4	-60.98	0.52	3.45014	0.859131	50.6094
2006	257	23400	24000	23700	34.5	3.83	-61.58	-61.41	-61	0.58	2.25252	-2.68816	51.0397
2006	257	24000	24600	24300	40.3	3.91	-61.68	-61.51	-61.12	0.56	1.11136	-1.26428	50.2739
2006	257	24600	25200	24900	41.3	3.9	-61.7	-61.65	-61.26	0.44	0.0694809	-0.375957	51.5192
2006	257	25200	25800	25500	40.7	3.77	-61.65	-61.64	-61.32	0.33	1.40364	1.3094	52.1652
2006	257	25800	26400	26100	41.8	3.97	-61.56	-61.59	-61.23	0.33	0.170973	-0.441059	51.1176
2006	257	26400	27000	26700	40.8	3.86	-61.41	-61.44	-61.13	0.28	1.20751	-9.5777	51.414
2006	257	27000	27600	27300	36.5	3.67	-61.26	-61.35	-61.07	0.19	2.23058	-6.06667	52.8706
2006	257	27600	28200	27900	31.5	3.76	-61.2	-61.27	-61.05	0.15	1.55093	-3.72158	52.5386
2006	257	28200	28800	28500	29.1	3.89	-61.24	-61.3	-61.03	0.21	3.47647	-9.66516	52.2686
2006	257	28800	29400	29100	32.9	3.57	-61.38	-61.39	-61.1	0.28	3.93807	-0.326557	54.4215
2006	257	29400	30000	29700	34.6	3.49	-61.49	-61.46	-61.11	0.38	4.57255	-4.53528	52.7459
2006	257	30000	30600	30300	39.2	3.54	-61.65	-61.51	-61.1	0.55	2.15253	-0.814009	54.157
2006	257	30600	31200	30900	45.9	3.21	-61.76	-61.58	-61.12	0.64	3.02643	-3.73799	52.2823
2006	257	31200	31800	31500	34.4	3.24	-61.9	-61.61	-61.06	0.84	2.13607	-1.51662	54.8934
2006	257	31800	32400	32100	26.4	3.36	-61.9	-61.6	-60.85	1.05	2.86325	-3.58279	53.7216
2006	257	32400	33000	32700	26.1	3.57	-62.04	-61.69	-60.85	1.19	2.85172	-9.34772	53.5608
2006	257	33000	33600	33300	27.3	3.49	-62.27	-61.8	-60.82	1.45	3.23657	-0.213713	55.1034
2006	257	33600	34200	33900	46.8	3.05	-62.57	-62.04	-61.15	1.42	3.33549	-4.11871	54.4687
2006	257	34200	34800	34500	55.2	3.13	-63.07	-62.1	-61.03	2.04	3.56344	-3.38809	54.6452
2006	257	34800	35400	35100	46	3.3	-63.29	-62.11	-60.7	2.59	4.85305	-2.8597	53.5664
2006	257	35400	36000	35700	50.5	2.85	-63.56	-62.31	-60.76	2.8	4.41738	-6.42911	54.4894
2006	257	36000	36600	36300	58.1	2.78	-63.97	-62.53	-61.04	2.93	3.15772	0.230552	54.9968
2006	257	36600	37200	36900	58.3	3.11	-63.89	-62.59	-61.18	2.71	1.87785	-0.834714	53.1157
2006	257	37200	37800	37500	51.2	2.96	-63.7	-62.75	-60.87	2.83	0.770091	-3.48947	55.5915
2006	257	37800	38400	38100	54.1	3.08	-63.57	-62.7	-61.08	2.49	1.8748	-4.70542	53.1149
2006	257	38400	39000	38700	60.4	2.82	-63.52	-63.03	-61.53	1.99	3.14549	2.4921	53.1622
2006	257	39000	39600	39300	51.6	3.15	-63.14	-62.73	-61.56	1.58	2.81523	-3.70603	56.0219
2006	257	39600	40200	39900	44.1	3.51	-62.69	-62.37	-61.5	1.19	3.4348	-1.87625	54.6148
2006	257	40200	40800	40500	30.5	3.74	-62.32	-62.1	-61.51	0.81	2.43446	-7.24596	50.4791
2006	257	40800	41400	41100	24	4.43	-62.16	-62	-61.49	0.67	-0.0506671	1.55848	50.536
2006	257	41400	42000	41700	23.9	4.57	-62.14	-62.02	-61.58	0.56	1.46892	-5.8042	52.883
2006	257	42000	42600	42300	36.9	3.93	-62.28	-62.15	-61.81	0.47	1.80311	-6.75777	51.3193
2006	257	42600	43200	42900	42	3.59	-62.39	-62.18	-61.81	0.58	2.92146	-2.85449	53.3285
2006	257	43200	43800	43500	35.4	3.7	-62.51	-62.26	-61.76	0.75	-9999	-9999	-9999
2006	257	43800	44400	44100	31.9	3.9	-62.56	-62.33	-61.67	0.89	-9999	-9999	-9999
2006	257	44400	45000	44700	44	3.59	-62.76	-62.5	-61.88	0.88	2.40511	-9999	-9999
2006	257	45000	45600	45300	49	3.63	-62.91	-62.56	-61.85	1.06	5.14759	-4.18216	-9999
2006	257	45600	46200	45900	52.3	3.15	-62.98	-62.69	-61.84	1.14	3.95653	-4.741	-9999
2006	257	46200	46800	46500	43.2	3.3	-63.07	-62.64	-61.84	1.23	2.73465	-1.92584	-9999
2006	257	46800	47400	47100	57.9	2.44	-63.27	-62.83	-62.27	1	0.969151	-9999	54.7604
2006	257	47400	48000	47700	62.4	2.32	-64	-63.24	-62.4	1.6	4.62064	-6.95124	55.1796
2006	257	48000	48600	48300	51.8	2.14	-63.98	-63.1	-62.07	1.91	6.75714	-0.860172	58.1283
2006	257	48600	49200	48900	45	1.97	-63.81	-63.13	-62.23	1.58	2.29627	-2.17581	57.9177
2006	257	49200	49800	49500	37.2	2.21	-63.57	-62.79	-62.03	1.54	4.39887	4.41211	60.9549
2006	257	49800	50400	50100	42.4	2.03	-63.59	-62.66	-61.89	1.7	6.03376	2.74695	59.871
2006	257	50400	51000	50700	48.5	2.05	-64.27	-62.69	-61.97	2.3	3.80048	1.7973	59.558
2006	257	51000	51600	51300	43.9	2.23	-64.46	-62.79	-61.86	2.6	6.52635	1.75524	57.9928
2006	257	51600	52200	51900	52	2.49	-64.72	-62.88	-61.93	2.79	1.96845	-0.00935267	56.6465
2006	257	52200	52800	52500	50.2	2.86	-64.79	-63.01	-61.79	3	5.1653	4.49365	55.6133
2006	257	52800	53400	53100	52.1	2.85	-64.94	-63.24	-61.86	3.08	3.09997	-0.378325	56.9384
2006	257	53400	54000	53700	45.7	3.47	-64.87	-63.12	-61.61	3.26	3.42916	-3.25341	55.1784
2006	257	54000	54600	54300	57.3	3.61	-64.89	-63.26	-61.71	3.18	1.89782	1.40363	51.9354
2006	257	54600	55200	54900	57.3	3.44	-64.76	-63.34	-61.68	3.08	3.69116	-4.32263	53.3136
2006	257	55200	55800	55500	57.5	3.24	-64.82	-63.32	-61.73	3.09	3.15672	-4.63218	50.8974
2006	257	55800	56400	56100	48.4	3.47	-64.8	-63.21	-61.43	3.37	4.22272	-0.028965	52.7612
2006	257	56400	57000	56700	42.8	3.23	-64.65	-62.86	-60.84	3.81	5.4036	0.137454	56.3534
2006	257	57000	57600	57300	52.4	2.4	-64.86	-63.05	-61.11	3.75	5.22614	-3.30729	58.958
2006	257	57600	58200	57900	58.2	2.61	-65.09	-63.74	-62.1	2.99	2.78144	-0.809707	56.5082
2006	257	58200	58800	58500	51.3	3.54	-64.99	-63.79	-62.24	2.75	2.9435	-0.402479	55.4047
2006	257	58800	59400	59100	59.4	2.67	-64.75	-63.98	-62.2	2.55	3.32457	0.896278	57.4809
2006	257	59400	60000	59700	69.8	2.92	-64.98	-63.6	-61.96	3.02	5.44024	-1.8506	57.9028
2006	257	60000	60600	60300	74.9	3.07	-65.19	-64.08	-62.09	3.1	-9999	3.0542	53.8042
2006	257	60600	61200	60900	73.3	3.3	-65.2	-63.95	-62.33	2.87	0.495823	-1.47478	53.8998
2006	257	61200	61800	61500	69.4	3.63	-65.29	-64.06	-62.08	3.21	2.75787	1.47919	52.0862
2006	257	61800	62400	62100	66.4	3.56	-65.27	-64.19	-62.2	3.07	5.11954	-7.17776	54.7028
2006	257	62400	63000	62700	68	3.82	-65.3	-64.15	-62.39	2.91	2.98723	0.269493	51.7667
2006	257	63000	63600	63300	61.6	4	-65.2	-63.97	-61.99	3.21	4.36423	0.903791	52.3343
2006	257	63600	64200	63900	56.2	4.36	-64.98	-63.94	-61.8	3.18	2.07013	-2.81728	51.1213
2006	257	64200	64800	64500	50.4	4.23	-64.84	-64.01	-61.17	3.67	1.74481	3.5541	55.1915
2006	257	64800	65400	65100	47.5	3.83	-64.8	-64.05	-60.83	3.97	2.59767	0.01508	55.8165
2006	257	65400	66000	65700	47	4.29	-64.71	-63.48	-60.63	4.08	2.26626	-3.30769	52.6534
2006	257	66000	66600	66300	53.7	3.71	-64.9	-64.03	-61.02	3.88	1.65967	-2.23356	51.1113
2006	257	66600	67200	66900	58	3.98	-65.21	-64.27	-61.2	4.01	2.95453	-8.36133	52.2463
2006	257	67200	67800	67500	42.6	4.55	-65.11	-63.18	-60.61	4.5	1.3113	-5.15188	53.8343
2006	257	67800	68400	68100	33.2	4.28	-64.7	-61.79	-60.3	4.4	0.786767	-2.05957	56.2485
2006	257	68400	69000	68700	57.7	3.39	-65.49	-63.72	-60.81	4.68	4.58948	-0.774688	55.5737
2006	257	69000	69600	69300	57.8	3.33	-65.63	-64.1	-60.64	4.99	5.31932	0.842389	56.5211
2006	257	69600	70200	69900	64.2	3.5	-65.85	-64.44	-60.81	5.04	4.98036	-4.7312	55.7607
2006	257	70200	70800	70500	56.6	4.12	-65.82	-63.55	-60.38	5.44	1.97437	-0.959549	53.243
2006	257	70800	71400	71100	63.6	3.95	-65.92	-64	-60.38	5.54	2.32718	-2.59526	53.7388
2006	257	71400	72000	71700	56.5	3.93	-65.9	-63.29	-60.12	5.78	2.27643	-0.780127	54.6406
2006	257	72000	72600	72300	47.7	4	-65.77	-62.81	-60.02	5.75	2.79841	-4.13904	57.2967
2006	257	72600	73200	72900	47.4	4.52	-65.58	-62.62	-60.08	5.5	1.3444	-3.53989	52.8955
2006	257	73200	73800	73500	42.3	4.65	-65.22	-62.05	-60.08	5.14	1.4653	1.55699	54.055
2006	257	73800	74400	74100	57	4.35	-65.37	-63.93	-60.16	5.21	-0.16486	-0.393578	54.7689
2006	257	74400	75000	74700	58.5	4.3	-65.27	-64.07	-60.27	5	2.06073	3.2581	54.3286
2006	257	75000	75600	75300	44.3	3.67	-64.98	-63.23	-60.09	4.89	3.21816	-3.77256	56.1336
2006	257	75600	76200	75900	56.5	2.94	-65.64	-63.5	-60.3	5.34	7.30179	-4.6545	58.4535
[truncated: 17,454 more rows]

## Sheet: Readme
Variable	Unit	Definition	Missing data code
Year		Year of the field deployment
jday	day	Julian day of the sampling day
tst	second	Start of the 10 min. interval in GMT
tsp	second	End of the 10 min. interval in GMT
tmid	second	Mid point of the 10 min. interval in GMT
WD	deg N	Circular average of Wind direction (assumed untiy wind speed) measured at 10 m above surface	-9999
WS	m/s	Arithmetic average of wind speed measured at 10 m above surface	-9999
Temp_2	deg C	Ambient Temperatue at 2 m above surface	-9999
Temp_10	deg C	Ambient Temperatue at 10 m above surface	-9999
Temp_22	deg C	Ambient Temperatue at 22 m above surface	-9999
DeltaT	deg C	Temperature difference between 22 m and 2 m	-9999
NO	pptv	Ambient NO mixing ration averaged in 10 min intervals	-9999
NO2	pptv	Ambient NO2 mixing ration averaged in 10 min intervals	-9999
NOy	pptv	Ambient NOy mixing ration averaged in 10 min intervals	-9999
