# Supplementary material for: The meteorology and chemistry of high nitrogen oxide concentrations in the stable boundary layer at the South Pole
Source: Copernicus journal article supplement (doi:10.5194/acp-18-3755-2018), 2018-03-14
Supplement: Supplementary file 5 [file ISCAT_Met_NO_Merge_2000.xlsx]

## Sheet: readme
Variable	Unit	Definition	Missing data code
Year		Year of the field deployment
jday	day	Julian day of the sampling day
tst	second	Start of the 10 min. interval in GMT
tsp	second	End of the 10 min. interval in GMT
tmid	second	Mid point of the 10 min. interval in GMT
WD	deg N	Circular average of Wind direction (assumed untiy wind speed) measured at 10 m above surface	-9999
WS	m/s	Arithmetic average of wind speed measured at 10 m above surface	-9999
Temp_2	deg C	Ambient Temperatue at 2 m above surface	-9999
Temp_10	deg C	Ambient Temperatue at 10 m above surface	-9999
Temp_22	deg C	Ambient Temperatue at 22 m above surface	-9999
DeltaT	deg C	Temperature difference between 22 m and 2 m	-9999
NO	pptv	Ambient NO mixing ration averaged in 10 min intervals	-9999
NO2	pptv	Ambient NO2 mixing ration averaged in 10 min intervals	-9999
NOy	pptv	Ambient NOy mixing ration averaged in 10 min intervals	-9999

## Sheet: 10minmrg
Year	Jday	Tst	Tsp	Tmid	WD	WS	Temp_2	Temp_10	Temp_22	DeltaT	NO	NO2	NOy
2000	320	300	900	600	316.4	6.55	-32.05	-9999	-31.38	0.6697	-9999	-9999	-9999
2000	320	900	1500	1200	316.7	6.57	-32.34	-9999	-31.58	0.7576	-9999	-9999	-9999
2000	320	1500	2100	1800	318.5	6.83	-32.45	-9999	-31.67	0.7786	-9999	-9999	-9999
2000	320	2100	2700	2400	318	6.36	-32.4	-9999	-31.91	0.4896	-9999	-9999	-9999
2000	320	2700	3300	3000	316.2	6.59	-32.23	-9999	-31.75	0.4783	-9999	-9999	-9999
2000	320	3300	3900	3600	313.5	7.03	-31.83	-9999	-31.59	0.2389	-9999	-9999	-9999
2000	320	3900	4500	4200	312.3	6.84	-31.95	-9999	-31.57	0.3792	-9999	-9999	-9999
2000	320	4500	5100	4800	310.6	7.02	-31.67	-9999	-31.52	0.14918	-9999	-9999	-9999
2000	320	5100	5700	5400	309.2	6.83	-31.52	-9999	-31.5	0.02	-9999	-9999	-9999
2000	320	5700	6300	6000	311.8	6.6	-31.45	-9999	-31.5	-0.04979	-9999	-9999	-9999
2000	320	6300	6900	6600	311.3	6.52	-31.32	-9999	-31.41	-0.08832	-9999	-9999	-9999
2000	320	6900	7500	7200	313.5	6.75	-31.27	-9999	-31.4	-0.12917	-9999	-9999	-9999
2000	320	7500	8100	7800	313.3	6.51	-31.45	-9999	-31.62	-0.16939	-9999	-9999	-9999
2000	320	8100	8700	8400	313.2	6.59	-31.5	-9999	-31.62	-0.1198	-9999	-9999	-9999
2000	320	8700	9300	9000	315	6.75	-31.49	-9999	-31.59	-0.1	-9999	-9999	-9999
2000	320	9300	9900	9600	316.1	6.66	-31.7	-9999	-31.73	-0.02937	-9999	-9999	-9999
2000	320	9900	10500	10200	318.3	6.73	-31.76	-9999	-31.84	-0.07853	-9999	-9999	-9999
2000	320	10500	11100	10800	319.1	6.88	-31.52	-9999	-31.58	-0.05937	-9999	-9999	-9999
2000	320	11100	11700	11400	318.9	7.02	-31.38	-9999	-31.37	0.00979	-9999	-9999	-9999
2000	320	11700	12300	12000	318.4	6.84	-31.27	-9999	-31.24	0.02979	-9999	-9999	-9999
2000	320	12300	12900	12600	316.4	6.39	-31.16	-9999	-31.25	-0.08948	-9999	-9999	-9999
2000	320	12900	13500	13200	310.1	6.16	-31.01	-9999	-31.14	-0.12949	-9999	-9999	-9999
2000	320	13500	14100	13800	311.8	6.15	-31.01	-9999	-31.12	-0.10969	-9999	-9999	-9999
2000	320	14100	14700	14400	313.1	6.29	-31.16	-9999	-31.2	-0.03916	-9999	-9999	-9999
2000	320	14700	15300	15000	314.4	6.27	-31.24	-9999	-31.36	-0.11886	-9999	-9999	-9999
2000	320	15300	15900	15600	314	6.36	-31.21	-9999	-31.32	-0.10969	-9999	-9999	-9999
2000	320	15900	16500	16200	312.6	6.15	-31.1	-9999	-31.2	-0.0979	-9999	-9999	-9999
2000	320	16500	17100	16800	312.5	6.07	-31.12	-9999	-31.21	-0.08843	-9999	-9999	-9999
2000	320	17100	17700	17400	311.2	6.29	-31.13	-9999	-31.21	-0.07896	-9999	-9999	-9999
2000	320	17700	18300	18000	311.8	5.66	-31.2	-9999	-31.3	-0.1	-9999	-9999	-9999
2000	320	18300	18900	18600	312.1	5.99	-31.1	-9999	-31.3	-0.199	-9999	-9999	-9999
2000	320	18900	19500	19200	312.2	6.06	-31.18	-9999	-31.3	-0.1198	-9999	-9999	-9999
2000	320	19500	20100	19800	312	6.45	-31.2	-9999	-31.31	-0.1099	-9999	-9999	-9999
2000	320	20100	20700	20400	313.4	6.56	-31.26	-9999	-31.49	-0.2293	-9999	-9999	-9999
2000	320	20700	21300	21000	314.6	6.52	-31.3	-9999	-31.43	-0.12823	-9999	-9999	-9999
2000	320	21300	21900	21600	315.4	6.5	-31.25	-9999	-31.35	-0.09895	-9999	-9999	-9999
2000	320	21900	22500	22200	314.6	6.28	-31.2	-9999	-31.26	-0.06	-9999	-9999	-9999
2000	320	22500	23100	22800	314.9	6.58	-31.18	-9999	-31.33	-0.1494	-9999	-9999	-9999
2000	320	23100	23700	23400	315.6	6.54	-31.27	-9999	-31.29	-0.02	-9999	-9999	-9999
2000	320	23700	24300	24000	318.7	5.75	-31.34	-9999	-31.3	0.03916	-9999	-9999	-9999
2000	320	24300	24900	24600	319	5.14	-31.4	-9999	-31.3	0.0979	-9999	-9999	-9999
2000	320	24900	25500	25200	322.2	5.22	-31.42	-9999	-31.42	-0.00042	-9999	-9999	-9999
2000	320	25500	26100	25800	324.2	5.19	-31.45	-9999	-31.41	0.04	-9999	-9999	-9999
2000	320	26100	26700	26400	325.2	5.28	-31.44	-9999	-31.44	-0.00021	-9999	-9999	-9999
2000	320	26700	27300	27000	326.3	5.41	-31.61	-9999	-31.55	0.0598	-9999	-9999	-9999
2000	320	27300	27900	27600	326.7	5.8	-31.7	-9999	-31.51	0.18889	-9999	-9999	-9999
2000	320	27900	28500	28200	321.9	5.61	-31.73	-9999	-31.69	0.03979	-9999	-9999	-9999
2000	320	28500	29100	28800	321.6	5.53	-31.82	-9999	-31.67	0.1495	-9999	-9999	-9999
2000	320	29100	29700	29400	323.3	5.38	-31.82	-9999	-31.6	0.2186	-9999	-9999	-9999
2000	320	29700	30300	30000	323.8	5.75	-31.9	-9999	-31.6	0.2978	-9999	-9999	-9999
2000	320	30300	30900	30600	326.4	5.51	-31.97	-9999	-31.73	0.23878	-9999	-9999	-9999
2000	320	30900	31500	31200	326.2	4.84	-32.02	-9999	-31.91	0.1099	-9999	-9999	-9999
2000	320	31500	32100	31800	324.3	4.85	-32.1	-9999	-31.83	0.27	-9999	-9999	-9999
2000	320	32100	32700	32400	324.5	4.61	-32.07	-9999	-31.86	0.2099	-9999	-9999	-9999
2000	320	32700	33300	33000	330.8	4.59	-32.11	-9999	-31.99	0.12	-9999	-9999	-9999
2000	320	33300	33900	33600	328.8	5.13	-32.14	-9999	-31.86	0.28	-9999	-9999	-9999
2000	320	33900	34500	34200	330.4	4.87	-32.29	-9999	-32	0.2884	-9999	-9999	-9999
2000	320	34500	35100	34800	332.8	4.55	-32.55	-9999	-32.26	0.2896	-9999	-9999	-9999
2000	320	35100	35700	35400	329.3	4.87	-32.64	-9999	-32.03	0.6097	-9999	-9999	-9999
2000	320	35700	36300	36000	329.3	5.24	-32.75	-9999	-32.04	0.7086	-9999	-9999	-9999
2000	320	36300	36900	36600	329.8	5.07	-32.91	-9999	-32.03	0.8785	-9999	-9999	-9999
2000	320	36900	37500	37200	330.4	5.22	-32.92	-9999	-31.96	0.9596	-9999	-9999	-9999
2000	320	37500	38100	37800	336.7	5.17	-33.09	-9999	-32.07	1.0199	-9999	-9999	-9999
2000	320	38100	38700	38400	336.2	5.33	-33.2	-9999	-32.05	1.148	-9999	-9999	-9999
2000	320	38700	39300	39000	334.8	5	-33.38	-9999	-32.2	1.176	-9999	-9999	-9999
2000	320	39300	39900	39600	334.1	5.28	-33.52	-9999	-32.1	1.42	-9999	-9999	-9999
2000	320	39900	40500	40200	335.3	5.51	-33.72	-9999	-32.25	1.47	-9999	-9999	-9999
2000	320	40500	41100	40800	338.4	5.08	-33.92	-9999	-32.38	1.54	-9999	-9999	-9999
2000	320	41100	41700	41400	336.9	4.9	-34.07	-9999	-32.49	1.58	119.54	5.41857	-9999
2000	320	41700	42300	42000	338.9	4.84	-34.28	-9999	-32.61	1.667	118.292	2.0071	-9999
2000	320	42300	42900	42600	337.7	4.79	-34.39	-9999	-32.63	1.76	115.297	2.87561	-9999
2000	320	42900	43500	43200	337.5	4.89	-34.45	-9999	-32.7	1.75	121.616	3.06811	-9999
2000	320	43500	44100	43800	338.5	4.83	-34.61	-9999	-32.77	1.84	123.367	4.04618	-9999
2000	320	44100	44700	44400	334.8	4.95	-34.66	-9999	-32.8	1.86	119.774	3.36599	-9999
2000	320	44700	45300	45000	337.9	4.86	-34.82	-9999	-32.85	1.97	123.216	2.80917	-9999
2000	320	45300	45900	45600	339.7	5.03	-35.04	-9999	-32.93	2.11	130.012	3.5407	-9999
2000	320	45900	46500	46200	337.9	5.33	-34.78	-9999	-32.81	1.97	119.993	4.80696	-9999
2000	320	46500	47100	46800	338.6	5.22	-34.77	-9999	-32.95	1.82	119.818	6.9977	-9999
2000	320	47100	47700	47400	344.6	5	-34.81	-9999	-33.23	1.579	121.149	4.46057	-9999
2000	320	47700	48300	48000	342.9	5.67	-34.9	-9999	-33.11	1.79	462.905	745.73	-9999
2000	320	48300	48900	48600	338.5	5.9	-34.76	-9999	-33.09	1.67	277.789	350.285	-9999
2000	320	48900	49500	49200	342.2	5.5	-34.9	-9999	-33.13	1.77	125.135	3.91056	-9999
2000	320	49500	50100	49800	339.1	5.39	-35.09	-9999	-33.2	1.89	814.619	1617.81	-9999
2000	320	50100	50700	50400	343.3	5.24	-35	-9999	-33.26	1.74	352.714	528.369	-9999
2000	320	50700	51300	51000	347	5.08	-34.88	-9999	-33.36	1.52	119.215	2.66601	-9999
2000	320	51300	51900	51600	345.1	4.91	-34.89	-9999	-33.51	1.38	205.667	315.604	-9999
2000	320	51900	52500	52200	345.3	4.96	-34.9	-9999	-33.72	1.18	115.262	2.56231	-9999
2000	320	52500	53100	52800	347.1	4.78	-34.9	-9999	-33.98	0.9191	118.173	2.90893	-9999
2000	320	53100	53700	53400	342.4	4.79	-35.02	-9999	-34.09	0.9287	451.801	719.558	-9999
2000	320	53700	54300	54000	342.2	4.72	-35.33	-9999	-34.02	1.31	135.48	4.39756	-9999
2000	320	54300	54900	54600	344.5	4.81	-35.41	-9999	-34.19	1.22	138.73	2.68791	-9999
2000	320	54900	55500	55200	345.6	5.16	-35.57	-9999	-34.1	1.47	138.725	2.15584	-9999
2000	320	55500	56100	55800	347.9	5.5	-35.46	-9999	-33.71	1.75	132.625	3.04858	-9999
2000	320	56100	56700	56400	352.6	5.21	-35.61	-9999	-33.78	1.83	135.349	3.15858	-9999
2000	320	56700	57300	57000	352.2	5.57	-35.69	-9999	-33.85	1.84	137.147	3.27417	-9999
2000	320	57300	57900	57600	353.6	5.51	-35.72	-9999	-34	1.719	128.802	2.30491	-9999
2000	320	57900	58500	58200	351.3	5.45	-35.8	-9999	-33.84	1.957	126.644	3.61423	-9999
2000	320	58500	59100	58800	351	5.61	-35.74	-9999	-34.17	1.568	118.915	2.70961	-9999
2000	320	59100	59700	59400	348.2	5.7	-35.65	-9999	-34.23	1.418	113.721	2.4758	-9999
2000	320	59700	60300	60000	345.7	5.44	-35.59	-9999	-34.15	1.44	114.704	1.58806	-9999
2000	320	60300	60900	60600	347.9	5.15	-35.54	-9999	-34.57	0.9699	116.991	2.50216	-9999
2000	320	60900	61500	61200	346.1	5.39	-35.52	-9999	-34.86	0.6599	120.873	2.60423	-9999
2000	320	61500	62100	61800	349.6	5.42	-35.69	-9999	-34.74	0.949	126.326	1.78999	-9999
2000	320	62100	62700	62400	350.8	5.09	-35.72	-9999	-34.86	0.86	126.862	1.18569	-9999
2000	320	62700	63300	63000	348.6	4.89	-35.74	-9999	-35.27	0.4697	132.022	3.97435	-9999
2000	320	63300	63900	63600	346.6	4.91	-35.37	-9999	-34.95	0.4189	131.678	4.27607	-9999
2000	320	63900	64500	64200	346.6	5.38	-34.9	-9999	-34.57	0.3275	121.069	2.72435	-9999
2000	320	64500	65100	64800	351.901	5.31	-34.62	-9999	-34.37	0.2496	117.871	3.4465	-9999
2000	320	65100	65700	65400	356.5	5.32	-34.47	-9999	-34.45	0.02	113.049	2.72542	-9999
2000	320	65700	66300	66000	357.7	5.61	-34.33	-9999	-34.27	0.0596	112.408	2.55749	-9999
2000	320	66300	66900	66600	359.2	5.22	-34.3	-9999	-34.35	-0.04772	114.073	1.86453	-9999
2000	320	66900	67500	67200	353.201	5.43	-34.56	-9999	-34.53	0.03	115.804	2.30282	-9999
2000	320	67500	68100	67800	347.6	6.33	-34.7	-9999	-34.48	0.2197	116.013	2.29651	-9999
2000	320	68100	68700	68400	354.001	5.73	-34.6	-9999	-34.43	0.17	110.597	2.39143	-9999
2000	320	68700	69300	69000	357.7	5.73	-34.39	-9999	-34.36	0.03	113.232	2.63539	-9999
2000	320	69300	69900	69600	357.2	6.11	-34.12	-9999	-34.23	-0.1097	121.185	5.11913	-9999
2000	320	69900	70500	70200	355.4	6.2	-34.21	-9999	-34.32	-0.10749	124.128	1.97295	-9999
2000	320	70500	71100	70800	357.5	5.55	-34.3	-9999	-34.35	-0.04943	130.759	2.97113	-9999
2000	320	71100	71700	71400	354.2	5.95	-34.11	-9999	-34.21	-0.09943	137.583	2.1112	-9999
2000	320	71700	72300	72000	348.6	6.15	-34.27	-9999	-34.35	-0.07863	142.534	2.04002	-9999
2000	320	72300	72900	72600	353.3	5.78	-34.39	-9999	-34.33	0.0588	145.378	2.17557	-9999
2000	320	72900	73500	73200	355	5.21	-34.42	-9999	-34.33	0.0896	146.755	2.52793	-9999
2000	320	73500	74100	73800	352.799	4.98	-34.7	-9999	-34.45	0.2497	148.361	1.56918	-9999
2000	320	74100	74700	74400	351.799	5.49	-34.89	-9999	-34.45	0.4392	154.05	2.79539	-9999
2000	320	74700	75300	75000	356.7	5.29	-34.96	-9999	-34.45	0.5088	156.458	2.68792	-9999
2000	320	75300	75900	75600	353	5.87	-35.01	-9999	-34.17	0.8397	149.336	2.69708	-9999
2000	320	75900	76500	76200	352.8	5.67	-35.09	-9999	-34.18	0.9093	148.06	3.10598	-9999
2000	320	76500	77100	76800	351.3	5.51	-35.15	-9999	-34.33	0.8197	148.473	2.14793	-9999
2000	320	77100	77700	77400	349.5	5.7	-35.04	-9999	-34.29	0.7493	139.096	5.9851	-9999
2000	320	77700	78300	78000	349.7	5.14	-35.03	-9999	-34.49	0.5399	137.835	2.34028	-9999
2000	320	78300	78900	78600	350.4	5.06	-35	-9999	-34.74	0.2584	139.655	2.05697	-9999
2000	320	78900	79500	79200	345.7	5.03	-34.93	-9999	-34.89	0.04	138.595	3.0258	-9999
2000	320	79500	80100	79800	347.1	5.56	-34.84	-9999	-34.67	0.1672	136.682	2.97641	-9999
2000	320	80100	80700	80400	351	5.52	-34.66	-9999	-34.57	0.09	133.936	2.36516	-9999
2000	320	80700	81300	81000	348.6	5.85	-34.7	-9999	-34.64	0.06	133.614	2.72506	-9999
2000	320	81300	81900	81600	351.9	5.7	-34.79	-9999	-34.77	0.01886	136.503	1.7654	-9999
2000	320	81900	82500	82200	352.4	5.66	-34.79	-9999	-34.68	0.10652	133.589	2.28512	-9999
2000	320	82500	83100	82800	350.7	5.82	-34.75	-9999	-34.51	0.2386	133.777	1.41989	-9999
2000	320	83100	83700	83400	351.7	6.05	-34.71	-9999	-34.4	0.3099	132.332	2.0229	-9999
2000	320	83700	84300	84000	352.8	5.79	-34.6	-9999	-34.39	0.21	132.579	2.45004	-9999
2000	320	84300	84900	84600	354.2	5.78	-34.52	-9999	-34.41	0.11	131.355	2.43233	-9999
2000	320	84900	85500	85200	357	5.67	-34.58	-9999	-34.4	0.18	136.252	2.06235	-9999
2000	320	85500	86100	85800	358.5	5.73	-34.6	-9999	-34.38	0.22	137.891	2.15366	-9999
2000	320	86100	86700	86400	1.5	5.35	-34.5222	-9999	-34.4556	0.0666667	140.546	1.89418	-9999
2000	321	300	900	600	5.09964	4.94	-34.48	-9999	-34.32	0.1596	139.304	2.06909	-9999
2000	321	900	1500	1200	8.4	4.49	-34.49	-9999	-34.3	0.1894	140.498	2.149	-9999
2000	321	1500	2100	1800	3.40005	5.33	-34.35	-9999	-34.09	0.2575	367.658	436.656	-9999
2000	321	2100	2700	2400	3.09999	5.67	-34.1	-9999	-34.16	-0.06	671.264	898.316	-9999
2000	321	2700	3300	3000	10.7001	5.51	-34	-9999	-34.19	-0.19	141.468	2.53279	-9999
2000	321	3300	3900	3600	10.5001	5.55	-34.02	-9999	-34.19	-0.17	138.861	3.00399	-9999
2000	321	3900	4500	4200	7.7	5.69	-33.95	-9999	-34.06	-0.11	135.762	2.18204	-9999
2000	321	4500	5100	4800	8.10001	5.85	-33.9	-9999	-34.11	-0.21	132.848	1.33871	-9999
2000	321	5100	5700	5400	8.39998	5.91	-33.84	-9999	-34.11	-0.27	131.28	2.07638	-9999
2000	321	5700	6300	6000	7.39999	5.8	-33.75	-9999	-33.94	-0.188	-9999	-9999	-9999
2000	321	6300	6900	6600	4.40001	6.26	-33.63	-9999	-33.76	-0.12749	-9999	-9999	-9999
2000	321	6900	7500	7200	2.60001	6.69	-33.66	-9999	-33.83	-0.16663	153.284	1.5745	-9999
2000	321	7500	8100	7800	1.89999	6.37	-33.84	-9999	-34.01	-0.17	219.515	90.8591	-9999
2000	321	8100	8700	8400	2.6	6.69	-33.61	-9999	-33.8	-0.18696	162.004	19.8342	-9999
2000	321	8700	9300	9000	3.59995	6.92	-33.45	-9999	-33.63	-0.18	173.683	48.8589	-9999
2000	321	9300	9900	9600	5.30001	6.83	-33.33	-9999	-33.59	-0.2596	124.288	13.2582	-9999
2000	321	9900	10500	10200	2.89999	6.72	-33.34	-9999	-33.62	-0.2791	109.484	4.01712	-9999
2000	321	10500	11100	10800	0.299984	6.83	-33.57	-9999	-33.71	-0.1397	106.472	1.38025	-9999
2000	321	11100	11700	11400	0.299996	6.84	-33.74	-9999	-33.73	0.00886	108.135	2.00136	-9999
2000	321	11700	12300	12000	0.899998	6.59	-33.68	-9999	-33.79	-0.10669	109.57	0.832739	-9999
2000	321	12300	12900	12600	1.00003	6.68	-33.62	-9999	-33.88	-0.2566	112.221	3.29362	-9999
2000	321	12900	13500	13200	4.80026	6.43	-33.74	-9999	-33.9	-0.1576	103.29	2.14979	-9999
2000	321	13500	14100	13800	9.00009	5.92	-33.67	-9999	-33.8	-0.12783	103.302	2.10583	-9999
2000	321	14100	14700	14400	4.10012	6.53	-33.6	-9999	-33.76	-0.1576	103.01	1.71045	-9999
2000	321	14700	15300	15000	0.700007	6.97	-33.56	-9999	-33.8	-0.2364	100.987	1.83796	-9999
2000	321	15300	15900	15600	2.2	6.92	-33.59	-9999	-33.75	-0.1582	100.313	1.83097	-9999
2000	321	15900	16500	16200	4.40001	7.09	-33.77	-9999	-33.73	0.03829	101.241	2.09827	-9999
2000	321	16500	17100	16800	4.20001	6.46	-34	-9999	-34.04	-0.04	100.247	2.73236	-9999
2000	321	17100	17700	17400	2.19998	6.95	-33.89	-9999	-33.92	-0.02886	109.561	2.44133	-9999
2000	321	17700	18300	18000	2.3	7.46	-33.78	-9999	-33.85	-0.06715	108.494	3.36017	-9999
2000	321	18300	18900	18600	2.1	7.42	-33.88	-9999	-33.87	0.01	105.583	2.19015	-9999
2000	321	18900	19500	19200	1.1	7.42	-34.16	-9999	-34.07	0.0896	103.123	10.8529	-9999
2000	321	19500	20100	19800	0.600002	7.36	-34.22	-9999	-34.06	0.15823	94.2656	1.36176	-9999
2000	321	20100	20700	20400	2.80002	7.06	-34.02	-9999	-33.77	0.2483	95.3494	1.21557	-9999
2000	321	20700	21300	21000	5.5	6.84	-33.93	-9999	-33.81	0.119	96.7353	1.85464	-9999
2000	321	21300	21900	21600	5.3	7.03	-33.93	-9999	-33.92	0.01	97.1917	1.2016	-9999
2000	321	21900	22500	22200	4.20001	7.36	-33.8	-9999	-33.86	-0.06	94.7887	1.38877	-9999
2000	321	22500	23100	22800	4.3	7.16	-33.78	-9999	-33.81	-0.02886	95.9993	1.37407	-9999
2000	321	23100	23700	23400	1.89999	7.57	-33.75	-9999	-33.89	-0.13732	93.3115	1.40697	-9999
2000	321	23700	24300	24000	4.20016	7.29	-34.05	-9999	-34.07	-0.02	93.6291	1.81985	-9999
2000	321	24300	24900	24600	3.1	7.35	-34.2	-9999	-34.1	0.0996	92.3282	1.4772	-9999
2000	321	24900	25500	25200	2.2	7.48	-34.36	-9999	-34.08	0.2776	94.3209	1.91752	-9999
2000	321	25500	26100	25800	1.70002	7.21	-34.37	-9999	-34.07	0.2971	98.2819	2.11058	-9999
2000	321	26100	26700	26400	359.5	7.22	-34.32	-9999	-34.1	0.2162	101.837	2.10261	-9999
2000	321	26700	27300	27000	357	7.37	-34.35	-9999	-34.1	0.2465	102.949	1.36543	-9999
2000	321	27300	27900	27600	357.9	7.42	-34.4	-9999	-34.11	0.2869	104.126	2.16812	-9999
2000	321	27900	28500	28200	359.5	7.22	-34.47	-9999	-34.21	0.2584	106.757	1.99018	-9999
2000	321	28500	29100	28800	2.49997	7.12	-34.46	-9999	-34.3	0.16	106.119	1.79875	-9999
2000	321	29100	29700	29400	4	6.98	-34.55	-9999	-34.33	0.22	106.665	1.70108	-9999
2000	321	29700	30300	30000	3.8	7.05	-34.4	-9999	-34.28	0.1192	105.815	1.98635	-9999
2000	321	30300	30900	30600	4.70002	7.29	-34.33	-9999	-34.33	0	102.772	1.96927	-9999
2000	321	30900	31500	31200	3.69995	7.78	-34.25	-9999	-34.35	-0.09732	-9999	-9999	-9999
2000	321	31500	32100	31800	2.10001	7.69	-34.36	-9999	-34.35	0.00943	99.9147	2.30999	-9999
2000	321	32100	32700	32400	3.39997	7.35	-34.12	-9999	-34.17	-0.04886	103.764	2.06387	-9999
2000	321	32700	33300	33000	5.10008	7.16	-34.34	-9999	-34.47	-0.12903	97.3121	2.60642	-9999
2000	321	33300	33900	33600	6.40006	6.47	-34.57	-9999	-34.63	-0.06	96.5818	2.17678	-9999
2000	321	33900	34500	34200	5.09998	6.09	-34.49	-9999	-34.54	-0.05	96.0945	3.24939	-9999
2000	321	34500	35100	34800	5.70008	5.79	-34.32	-9999	-34.43	-0.11	97.1678	2.07021	-9999
2000	321	35100	35700	35400	4.9	6.05	-34.49	-9999	-34.63	-0.14	93.7187	1.59925	-9999
2000	321	35700	36300	36000	1.70003	6.58	-34.47	-9999	-34.59	-0.12	94.7984	1.34208	-9999
2000	321	36300	36900	36600	357.7	6.99	-34.25	-9999	-34.41	-0.15823	94.4693	1.2885	-9999
2000	321	36900	37500	37200	355.8	7.37	-34.09	-9999	-34.22	-0.1293	94.1472	1.06363	-9999
2000	321	37500	38100	37800	356.3	7.24	-34.08	-9999	-34.35	-0.2667	93.0521	1.96719	-9999
2000	321	38100	38700	38400	354.6	7.44	-33.99	-9999	-34.22	-0.2294	92.3092	1.87136	-9999
2000	321	38700	39300	39000	354	7.44	-33.96	-9999	-34.11	-0.15	92.3591	2.63303	-9999
2000	321	39300	39900	39600	354.6	7.02	-34.07	-9999	-34.14	-0.07	90.9468	1.98573	-9999
2000	321	39900	40500	40200	355.7	6.77	-34.14	-9999	-34.19	-0.05	93.6807	1.67172	-9999
2000	321	40500	41100	40800	358	6.4	-34.04	-9999	-34.07	-0.03	116.537	46.6666	-9999
2000	321	41100	41700	41400	358.2	6.46	-34.12	-9999	-34.06	0.06	96.303	1.81403	-9999
2000	321	41700	42300	42000	359.7	5.99	-34.01	-9999	-34.05	-0.04	98.0476	1.24982	-9999
2000	321	42300	42900	42600	358.6	5.7	-33.94	-9999	-34.02	-0.08	97.5891	2.16564	-9999
2000	321	42900	43500	43200	356.4	5.93	-33.92	-9999	-33.85	0.07	98.0283	3.29583	-9999
2000	321	43500	44100	43800	358.4	5.95	-33.97	-9999	-33.8	0.17	98.4173	1.85402	-9999
2000	321	44100	44700	44400	359.3	5.87	-33.93	-9999	-33.87	0.06	97.6802	1.65772	-9999
2000	321	44700	45300	45000	358	5.67	-34.04	-9999	-34	0.04	96.818	1.80753	-9999
2000	321	45300	45900	45600	359.3	5.31	-34.03	-9999	-33.91	0.12	100.284	1.98242	-9999
2000	321	45900	46500	46200	1.6	5.25	-33.98	-9999	-33.9	0.08	100.222	1.32631	-9999
2000	321	46500	47100	46800	3.59996	5.31	-34.07	-9999	-34.06	0.01	98.2188	1.31511	-9999
2000	321	47100	47700	47400	5.5	5.04	-33.8	-9999	-33.9	-0.09789	101.716	1.73023	-9999
2000	321	47700	48300	48000	4.50002	4.96	-33.68	-9999	-33.8	-0.11464	99.9899	1.40208	-9999
2000	321	48300	48900	48600	4.70002	4.82	-33.78	-9999	-33.85	-0.06903	99.2024	1.81754	-9999
2000	321	48900	49500	49200	3.90001	5.04	-33.8	-9999	-33.91	-0.11	100.402	2.45857	-9999
2000	321	49500	50100	49800	6.40002	5.41	-33.76	-9999	-33.8	-0.03772	99.9214	1.74668	-9999
2000	321	50100	50700	50400	2	5.16	-33.86	-9999	-33.84	0.02	-9999	-9999	-9999
2000	321	50700	51300	51000	359.6	5.04	-34	-9999	-33.98	0.02	99.6702	1.77343	-9999
2000	321	51300	51900	51600	359.8	5.56	-34.08	-9999	-34.05	0.03	98.1379	1.83044	-9999
2000	321	51900	52500	52200	1.70001	5.45	-34.05	-9999	-34.04	0.01	98.6974	1.90903	-9999
2000	321	52500	53100	52800	2.4	5.52	-34.05	-9999	-34	0.05	97.8058	1.49106	-9999
2000	321	53100	53700	53400	1.10001	5.98	-34.06	-9999	-34	0.06	95.7822	1.62058	-9999
2000	321	53700	54300	54000	359.1	6.09	-33.85	-9999	-33.92	-0.06943	93.6723	1.47112	-9999
2000	321	54300	54900	54600	358.8	6.15	-33.7	-9999	-33.8	-0.0943	94.3446	1.63946	-9999
2000	321	54900	55500	55200	357.7	6.31	-33.72	-9999	-33.77	-0.04715	94.6275	2.33844	-9999
2000	321	55500	56100	55800	357	5.99	-33.74	-9999	-33.88	-0.13806	95.3129	1.40818	-9999
2000	321	56100	56700	56400	359.9	5.88	-33.82	-9999	-33.9	-0.08	95.1695	1.96259	-9999
2000	321	56700	57300	57000	0.300014	6.09	-33.8	-9999	-33.9	-0.1	96.5585	1.46906	-9999
2000	321	57300	57900	57600	2.5	6.04	-33.83	-9999	-33.86	-0.03	96.9071	1.96436	-9999
2000	321	57900	58500	58200	1.7	6.28	-33.71	-9999	-33.87	-0.15589	98.5314	1.65546	-9999
2000	321	58500	59100	58800	360	6.52	-33.73	-9999	-33.85	-0.11652	96.0223	1.7855	-9999
2000	321	59100	59700	59400	359.5	6.57	-33.86	-9999	-33.88	-0.02	94.9812	1.8383	-9999
2000	321	59700	60300	60000	0.600009	6.5	-33.88	-9999	-33.86	0.02	98.6329	1.97013	-9999
2000	321	60300	60900	60600	359.7	6.84	-33.93	-9999	-34	-0.07	99.5343	1.93781	-9999
2000	321	60900	61500	61200	358.6	6.91	-33.91	-9999	-33.98	-0.07	98.9182	1.4989	-9999
2000	321	61500	62100	61800	359.9	6.66	-33.67	-9999	-33.77	-0.0992	104.535	2.7821	-9999
2000	321	62100	62700	62400	359.6	6.71	-33.63	-9999	-33.86	-0.2268	104.457	1.22909	-9999
2000	321	62700	63300	63000	0.799987	6.74	-33.76	-9999	-33.9	-0.1384	101.881	1.54188	-9999
2000	321	63300	63900	63600	1.7	6.64	-33.71	-9999	-33.8	-0.08487	99.3398	1.97393	-9999
2000	321	63900	64500	64200	2.59999	6.65	-33.6	-9999	-33.71	-0.1096	97.5605	1.71462	-9999
2000	321	64500	65100	64800	1.60002	6.94	-33.6	-9999	-33.82	-0.2162	98.4252	1.77023	-9999
2000	321	65100	65700	65400	1.7	6.84	-33.58	-9999	-33.79	-0.2066	96.6487	1.95094	-9999
2000	321	65700	66300	66000	1.7	6.5	-33.57	-9999	-33.7	-0.13	96.2388	2.63722	-9999
2000	321	66300	66900	66600	2.3	6.39	-33.53	-9999	-33.72	-0.1889	95.7067	1.46224	-9999
2000	321	66900	67500	67200	3.7	5.92	-33.56	-9999	-33.8	-0.2364	96.3677	2.11746	-9999
2000	321	67500	68100	67800	4.7	5.79	-33.5	-9999	-33.69	-0.19	96.3934	1.66098	-9999
2000	321	68100	68700	68400	7.49998	5.47	-33.48	-9999	-33.6	-0.12	98.653	2.03119	-9999
2000	321	68700	69300	69000	9	5.47	-33.58	-9999	-33.63	-0.05	100.013	2.44525	-9999
2000	321	69300	69900	69600	8.6	5.5	-33.5	-9999	-33.55	-0.05	101.123	1.21878	-9999
2000	321	69900	70500	70200	7.39999	5.32	-33.44	-9999	-33.53	-0.09	99.8953	2.19247	-9999
2000	321	70500	71100	70800	8.1	5.09	-33.41	-9999	-33.5	-0.09	99.9745	2.06117	-9999
2000	321	71100	71700	71400	6.69999	5.08	-33.54	-9999	-33.6	-0.06	101.189	1.7309	-9999
2000	321	71700	72300	72000	8.20001	5.08	-33.57	-9999	-33.5	0.07	105.291	1.76657	-9999
2000	321	72300	72900	72600	6.79999	5.06	-33.55	-9999	-33.35	0.2	104.681	1.93876	-9999
2000	321	72900	73500	73200	4.40001	4.96	-33.41	-9999	-33.25	0.158	103.61	2.13299	-9999
2000	321	73500	74100	73800	4.1	4.92	-33.38	-9999	-33.29	0.0896	105.554	2.64404	-9999
2000	321	74100	74700	74400	5.19997	4.39	-33.31	-9999	-33.3	0.01	102.236	1.54569	-9999
2000	321	74700	75300	75000	3.89999	4.04	-33.36	-9999	-33.21	0.14572	102.654	2.21748	-9999
2000	321	75300	75900	75600	3.7	3.97	-33.34	-9999	-33.26	0.07675	101.802	1.30291	-9999
2000	321	75900	76500	76200	3.6	4.41	-33.25	-9999	-33.25	-0.00057	102.137	2.10872	-9999
2000	321	76500	77100	76800	3.1	5.32	-32.95	-9999	-33.04	-0.09	97.2147	2.66941	-9999
2000	321	77100	77700	77400	3.39999	5.32	-32.97	-9999	-33.09	-0.12	94.9925	1.86033	-9999
2000	321	77700	78300	78000	1.70001	5.68	-33.04	-9999	-33.18	-0.13903	94.9623	2.46245	-9999
2000	321	78300	78900	78600	1.4	5.69	-33.35	-9999	-33.4	-0.0492	95.4266	1.52149	-9999
2000	321	78900	79500	79200	3.29999	5.86	-33.37	-9999	-33.28	0.08943	98.1268	2.00893	-9999
2000	321	79500	80100	79800	2.5	6.08	-33	-9999	-33.02	-0.02	101.315	2.85257	-9999
2000	321	80100	80700	80400	3.39999	6.39	-32.77	-9999	-32.95	-0.1788	100.451	1.75718	-9999
2000	321	80700	81300	81000	1.50002	6.29	-32.91	-9999	-33.16	-0.25	99.6803	2.3862	-9999
2000	321	81300	81900	81600	1.6	6.45	-33.07	-9999	-33.25	-0.1781	97.645	1.9475	-9999
2000	321	81900	82500	82200	0.700035	6.51	-33.1	-9999	-33.2	-0.1	-9999	-9999	-9999
2000	321	82500	83100	82800	1.89999	6.45	-33.08	-9999	-33.23	-0.14863	-9999	-9999	-9999
2000	321	83100	83700	83400	1.19998	6.2	-33.24	-9999	-33.39	-0.14743	-9999	-9999	-9999
2000	321	83700	84300	84000	2.6	6.37	-33.41	-9999	-33.43	-0.02	-9999	-9999	-9999
2000	321	84300	84900	84600	4.20001	6.73	-33.43	-9999	-33.4	0.03	-9999	-9999	-9999
2000	321	84900	85500	85200	4.70002	6.43	-33.61	-9999	-33.49	0.12	-9999	-9999	-9999
2000	321	85500	86100	85800	6	6.35	-33.66	-9999	-33.54	0.1184	-9999	-9999	-9999
2000	321	86100	86700	86400	7.1	6.62	-33.45	-9999	-33.34	0.11	-9999	-9999	-9999
2000	322	300	900	600	9.29997	6.6	-33.51	-9999	-33.42	0.09	-9999	-9999	-9999
2000	322	900	1500	1200	9.19997	6.55	-33.74	-9999	-33.62	0.11776	-9999	-9999	-9999
2000	322	1500	2100	1800	7.4	6.54	-33.54	-9999	-33.49	0.05	-9999	-9999	-9999
2000	322	2100	2700	2400	6.60001	6.82	-33.49	-9999	-33.43	0.06	-9999	-9999	-9999
2000	322	2700	3300	3000	6.6	6.52	-33.84	-9999	-33.57	0.2673	-9999	-9999	-9999
2000	322	3300	3900	3600	7.5	6.29	-33.65	-9999	-33.39	0.2599	-9999	-9999	-9999
2000	322	3900	4500	4200	8	6.1	-33.48	-9999	-33.45	0.03	-9999	-9999	-9999
2000	322	4500	5100	4800	8.20001	5.64	-33.75	-9999	-33.68	0.06846	-9999	-9999	-9999
2000	322	5100	5700	5400	6.10004	5.52	-33.98	-9999	-33.6	0.3789	100.435	10.1941	-9999
2000	322	5700	6300	6000	3.39999	5.99	-33.53	-9999	-33.4	0.1299	105.455	2.70692	-9999
2000	322	6300	6900	6600	2.20005	6.03	-33.37	-9999	-33.35	0.02	106.774	2.38363	-9999
2000	322	6900	7500	7200	359.7	6.21	-33.2	-9999	-33.18	0.01886	104.589	2.29625	-9999
2000	322	7500	8100	7800	358.3	6.55	-33.13	-9999	-33.14	-0.01	100.326	2.52234	-9999
2000	322	8100	8700	8400	359.2	6.6	-33.18	-9999	-33.18	0	100.382	2.42402	-9999
2000	322	8700	9300	9000	359.7	6.59	-33.08	-9999	-33.11	-0.03	103.644	2.42233	-9999
2000	322	9300	9900	9600	0.800017	6.73	-33.21	-9999	-33.32	-0.10903	105.504	17.7205	-9999
2000	322	9900	10500	10200	2.3	6.94	-33.39	-9999	-33.44	-0.0496	101.509	2.68092	-9999
2000	322	10500	11100	10800	3.1	7.03	-33.32	-9999	-33.33	-0.00886	100.658	1.53301	-9999
2000	322	11100	11700	11400	4	6.96	-33.55	-9999	-33.39	0.16	101.402	2.48265	-9999
2000	322	11700	12300	12000	3.5	6.93	-33.49	-9999	-33.19	0.2972	109.871	2.30436	-9999
2000	322	12300	12900	12600	3.59998	7.07	-33.3	-9999	-33	0.2984	108.651	1.82941	-9999
2000	322	12900	13500	13200	4.8	7.08	-33.09	-9999	-32.95	0.14	106.549	2.12096	-9999
2000	322	13500	14100	13800	5.79999	7.04	-33.24	-9999	-33.2	0.03943	100.669	4.3647	-9999
2000	322	14100	14700	14400	8.20001	7.07	-33.35	-9999	-33.19	0.15803	98.5327	2.23352	-9999
2000	322	14700	15300	15000	8.3	6.87	-33.35	-9999	-33.2	0.14696	103.373	2.47573	-9999
2000	322	15300	15900	15600	8.2	6.07	-33.42	-9999	-33.19	0.2263	104.932	2.35581	-9999
2000	322	15900	16500	16200	6.30001	6.3	-33.34	-9999	-33.02	0.3177	102.357	2.50103	-9999
2000	322	16500	17100	16800	5.40001	6.6	-33.25	-9999	-32.93	0.3193	99.2498	1.76281	-9999
2000	322	17100	17700	17400	5.59999	6.83	-33.25	-9999	-33.15	0.09829	95.3294	2.41519	-9999
2000	322	17700	18300	18000	5.7	6.78	-33.42	-9999	-33.28	0.13783	95.8763	3.97041	-9999
2000	322	18300	18900	18600	4.80001	7.45	-33.16	-9999	-33.07	0.08863	97.3826	1.55356	-9999
2000	322	18900	19500	19200	4.7	7.7	-33.08	-9999	-32.97	0.11	99.1621	1.93693	-9999
2000	322	19500	20100	19800	6.1	7.81	-33.2	-9999	-33	0.2	97.5072	2.55219	-9999
2000	322	20100	20700	20400	8.1	7.55	-33.05	-9999	-32.82	0.2294	96.4253	2.20376	-9999
2000	322	20700	21300	21000	9.5	7.42	-32.98	-9999	-32.86	0.12	95.8369	2.39883	-9999
2000	322	21300	21900	21600	8.8	7.5	-32.89	-9999	-32.72	0.16709	92.878	1.76557	-9999
2000	322	21900	22500	22200	8.7	7.63	-32.82	-9999	-32.69	0.12903	88.4062	2.7666	-9999
2000	322	22500	23100	22800	8.60001	7.4	-32.84	-9999	-32.64	0.198	90.6283	2.5283	-9999
2000	322	23100	23700	23400	10	6.97	-33	-9999	-32.87	0.1292	90.5519	1.88615	-9999
2000	322	23700	24300	24000	10.5	7.19	-32.91	-9999	-32.77	0.13823	93.0295	2.00153	-9999
2000	322	24300	24900	24600	11.7	6.8	-32.88	-9999	-32.71	0.16606	92.9717	1.32559	-9999
2000	322	24900	25500	25200	10.9	7.04	-32.9	-9999	-32.64	0.2566	91.5655	1.27184	-9999
2000	322	25500	26100	25800	9	7.43	-32.91	-9999	-32.7	0.20643	90.7445	2.3481	-9999
2000	322	26100	26700	26400	7.89999	7.53	-33.01	-9999	-32.89	0.12	91.5587	2.01993	-9999
2000	322	26700	27300	27000	7.1	8.07	-32.91	-9999	-32.78	0.12886	93.3792	1.94587	-9999
2000	322	27300	27900	27600	7.3	8.11	-32.93	-9999	-32.77	0.15846	94.3489	1.54505	-9999
2000	322	27900	28500	28200	7.90002	7.68	-33.09	-9999	-32.81	0.2794	92.655	2.05712	-9999
2000	322	28500	29100	28800	9.5	7.37	-33.04	-9999	-32.74	0.2989	93.9369	1.53738	-9999
2000	322	29100	29700	29400	13.6004	7.36	-33.14	-9999	-32.81	0.33	91.7104	2.11634	-9999
2000	322	29700	30300	30000	16.8	6.87	-33.29	-9999	-32.92	0.3691	91.1004	2.29641	-9999
2000	322	30300	30900	30600	15.2	7.25	-32.98	-9999	-32.77	0.2085	92.6075	2.3103	-9999
2000	322	30900	31500	31200	14.2	6.82	-33.25	-9999	-33.02	0.2282	88.1085	1.74398	-9999
2000	322	31500	32100	31800	12.3	7.15	-32.97	-9999	-32.81	0.1596	90.3619	2.48064	-9999
2000	322	32100	32700	32400	12.7	7.28	-32.73	-9999	-32.54	0.1889	88.075	2.22213	-9999
2000	322	32700	33300	33000	14.1	6.91	-32.73	-9999	-32.54	0.1881	87.1234	2.14879	-9999
2000	322	33300	33900	33600	12.4	6.84	-32.85	-9999	-32.64	0.20596	85.9796	1.40588	-9999
2000	322	33900	34500	34200	10.4	7.23	-32.87	-9999	-32.66	0.20603	87.3485	1.77682	-9999
2000	322	34500	35100	34800	11	7.16	-32.48	-9999	-32.36	0.1197	89.0834	2.26221	-9999
2000	322	35100	35700	35400	10.6	6.8	-32.4	-9999	-32.38	0.02	90.2673	2.13552	-9999
2000	322	35700	36300	36000	6.69997	7.21	-32.67	-9999	-32.58	0.09	182.946	198.328	-9999
2000	322	36300	36900	36600	7.4	7.44	-32.85	-9999	-32.79	0.05829	1774.68	438.053	-9999
2000	322	36900	37500	37200	8.20001	7.23	-32.72	-9999	-32.65	0.06829	696.904	533.284	-9999
2000	322	37500	38100	37800	6	7.71	-32.52	-9999	-32.48	0.04	270.767	62.4246	-9999
2000	322	38100	38700	38400	7	7.42	-32.33	-9999	-32.28	0.05091	947.523	560.013	-9999
2000	322	38700	39300	39000	5.49998	7.18	-32.24	-9999	-32.3	-0.05658	976.525	802.617	-9999
2000	322	39300	39900	39600	3.7	7.43	-32.21	-9999	-32.19	0.02	218.533	146.646	-9999
2000	322	39900	40500	40200	3.30006	7.96	-31.95	-9999	-31.98	-0.02937	664.682	1102	-9999
2000	322	40500	41100	40800	1.4	7.92	-31.92	-9999	-32.04	-0.11948	86.3037	1.74113	-9999
2000	322	41100	41700	41400	3.20001	7.98	-32.14	-9999	-32.25	-0.10732	83.0459	1.97685	-9999
2000	322	41700	42300	42000	4.1	7.96	-32.38	-9999	-32.4	-0.02	79.3503	1.91102	-9999
2000	322	42300	42900	42600	7.30002	8.02	-32.38	-9999	-32.34	0.04	78.9655	1.55246	-9999
2000	322	42900	43500	43200	5.89992	8.1	-32.27	-9999	-32.28	-0.01114	78.5095	2.22747	-9999
2000	322	43500	44100	43800	5.1	8.38	-32.19	-9999	-32.22	-0.02886	74.4757	1.93632	-9999
2000	322	44100	44700	44400	7.10001	8.36	-32.01	-9999	-31.98	0.03	76.2068	2.07014	-9999
2000	322	44700	45300	45000	6.6	8.09	-32.11	-9999	-31.93	0.18	77.3757	2.2748	-9999
2000	322	45300	45900	45600	6.59998	8.06	-32.2	-9999	-31.97	0.23	75.3516	2.69109	-9999
2000	322	45900	46500	46200	7.6	7.69	-32.34	-9999	-32.08	0.2571	75.4576	1.9907	-9999
2000	322	46500	47100	46800	6.30001	7.92	-32.34	-9999	-32.06	0.2772	73.908	1.8433	-9999
2000	322	47100	47700	47400	7.80005	7.93	-32.5	-9999	-32.14	0.3581	71.6536	1.0714	-9999
2000	322	47700	48300	48000	8.00003	7.62	-32.61	-9999	-32.33	0.2792	72.0458	1.23383	-9999
2000	322	48300	48900	48600	6.7	7.6	-32.62	-9999	-32.34	0.2796	69.7551	1.68926	-9999
2000	322	48900	49500	49200	7.69984	7.5	-32.37	-9999	-32.18	0.18666	69.0347	2.58753	-9999
2000	322	49500	50100	49800	7.99991	7.13	-32.54	-9999	-32.28	0.2594	66.1587	1.96218	-9999
2000	322	50100	50700	50400	7	7.2	-32.47	-9999	-32.27	0.19806	67.2117	1.68476	-9999
2000	322	50700	51300	51000	8.59998	7.55	-32.16	-9999	-32.11	0.04829	71.6488	1.86267	-9999
2000	322	51300	51900	51600	11.6002	8.38	-32.24	-9999	-32.13	0.10783	71.6117	1.36593	-9999
2000	322	51900	52500	52200	11.8	8.62	-32.27	-9999	-32.11	0.15713	71.5614	1.54659	-9999
2000	322	52500	53100	52800	13.4001	8.74	-32.43	-9999	-32.37	0.05943	69.0068	1.03499	-9999
2000	322	53100	53700	53400	13.7	8.76	-32.54	-9999	-32.38	0.16	70.4015	2.01732	-9999
2000	322	53700	54300	54000	10.1	8.7	-32.5	-9999	-32.41	0.09	68.8179	2.38886	-9999
2000	322	54300	54900	54600	9.80002	8.76	-32.51	-9999	-32.44	0.0697	70.0567	2.64892	-9999
2000	322	54900	55500	55200	8.60001	8.69	-32.52	-9999	-32.48	0.04	71.4668	2.22383	-9999
2000	322	55500	56100	55800	7.8	8.49	-32.56	-9999	-32.5	0.0596	68.4614	1.21148	-9999
2000	322	56100	56700	56400	9.30007	8.45	-32.77	-9999	-32.64	0.12686	70.1874	1.86371	-9999
2000	322	56700	57300	57000	7.39993	8.5	-32.82	-9999	-32.83	-0.01057	71.3408	2.47174	-9999
2000	322	57300	57900	57600	8.1	8.98	-32.87	-9999	-32.81	0.06	73.9338	2.03649	-9999
2000	322	57900	58500	58200	7.4	8.85	-32.93	-9999	-32.9	0.03	73.8604	1.89393	-9999
2000	322	58500	59100	58800	8.1	8.78	-33.01	-9999	-32.98	0.03	75.8526	2.60025	-9999
2000	322	59100	59700	59400	8.2	9.01	-33.11	-9999	-33.06	0.04903	77.1079	1.80082	-9999
2000	322	59700	60300	60000	9.69999	8.84	-33.28	-9999	-33.06	0.217	76.9579	2.09295	-9999
2000	322	60300	60900	60600	11.9	8.37	-33	-9999	-32.83	0.1696	81.9192	1.70906	-9999
2000	322	60900	61500	61200	13.7	8.09	-33.18	-9999	-33.06	0.1188	81.5983	1.67125	-9999
2000	322	61500	62100	61800	14.2	8.09	-33.13	-9999	-32.95	0.1792	83.1364	2.40315	-9999
2000	322	62100	62700	62400	14.3	8.38	-32.9	-9999	-32.8	0.1	83.6429	2.15101	-9999
2000	322	62700	63300	63000	15.9	8.39	-32.87	-9999	-32.79	0.08	83.7682	3.0285	-9999
2000	322	63300	63900	63600	15.4	8.07	-32.82	-9999	-32.81	0.01057	82.4401	1.95863	-9999
2000	322	63900	64500	64200	17.3999	7.89	-32.66	-9999	-32.65	0.00886	86.0544	1.2506	-9999
2000	322	64500	65100	64800	18.2	7.59	-32.82	-9999	-32.77	0.05	85.6701	1.94979	-9999
2000	322	65100	65700	65400	16.5	8.18	-32.94	-9999	-32.94	0	84.6653	1.08845	-9999
2000	322	65700	66300	66000	16	8.66	-32.89	-9999	-32.82	0.07	87.9259	1.62697	-9999
2000	322	66300	66900	66600	13.3	8.94	-32.78	-9999	-32.69	0.08772	87.2014	1.61633	-9999
2000	322	66900	67500	67200	14.5	8.49	-32.76	-9999	-32.68	0.07675	90.0012	5.04447	-9999
2000	322	67500	68100	67800	14.1	8.8	-32.82	-9999	-32.85	-0.02829	85.6656	1.88201	-9999
2000	322	68100	68700	68400	11.6	8.45	-32.97	-9999	-32.91	0.06	86.4433	1.57987	-9999
2000	322	68700	69300	69000	11.3	8.41	-32.97	-9999	-32.86	0.11	87.9702	2.21905	-9999
2000	322	69300	69900	69600	10.2	9.1	-32.8	-9999	-32.81	-0.01057	86.058	1.3865	-9999
2000	322	69900	70500	70200	10.1	9.28	-32.63	-9999	-32.73	-0.09789	85.9406	1.47373	-9999
2000	322	70500	71100	70800	9.49998	9.22	-32.58	-9999	-32.61	-0.03	84.285	1.8112	-9999
2000	322	71100	71700	71400	10.8	8.96	-32.66	-9999	-32.62	0.04	82.0547	1.49609	-9999
2000	322	71700	72300	72000	14.7	8.55	-32.67	-9999	-32.68	-0.01	83.2467	1.94429	-9999
2000	322	72300	72900	72600	14.3	8.26	-32.75	-9999	-32.69	0.05658	81.6337	1.56908	-9999
2000	322	72900	73500	73200	15.9	8.12	-32.93	-9999	-32.76	0.16806	83.0662	1.90641	-9999
2000	322	73500	74100	73800	16	7.76	-33.1	-9999	-32.82	0.28	85.3894	1.95185	-9999
2000	322	74100	74700	74400	14	8.27	-33.04	-9999	-32.83	0.21	89.1832	1.66985	-9999
2000	322	74700	75300	75000	14.5	8.01	-32.99	-9999	-32.75	0.2383	88.7942	1.89565	-9999
2000	322	75300	75900	75600	17.6	7.7	-33.11	-9999	-32.8	0.31	88.812	1.62233	-9999
2000	322	75900	76500	76200	16.6	7.96	-33.08	-9999	-32.85	0.23	88.5575	2.13456	-9999
2000	322	76500	77100	76800	14.6	8.16	-32.88	-9999	-32.68	0.1982	87.9255	1.65707	-9999
2000	322	77100	77700	77400	13.9	8.16	-32.56	-9999	-32.45	0.11	87.4791	1.25136	-9999
2000	322	77700	78300	78000	13.1	8.29	-32.56	-9999	-32.41	0.15	87.8438	2.00436	-9999
2000	322	78300	78900	78600	12.1	8.48	-32.52	-9999	-32.51	0.01	85.5001	2.07467	-9999
2000	322	78900	79500	79200	13.1	8.55	-32.64	-9999	-32.6	0.04	86.2746	2.02821	-9999
2000	322	79500	80100	79800	14	8.74	-32.56	-9999	-32.5	0.06	-9999	-9999	-9999
2000	322	80100	80700	80400	14.1	8.71	-32.63	-9999	-32.47	0.16	86.0424	1.3498	-9999
2000	322	80700	81300	81000	13.7	8.62	-32.51	-9999	-32.45	0.06	86.4016	1.82939	-9999
2000	322	81300	81900	81600	14.8	8.56	-32.41	-9999	-32.34	0.07	83.1206	1.76035	-9999
2000	322	81900	82500	82200	14.4	8.61	-32.31	-9999	-32.24	0.06715	82.0847	1.63578	-9999
2000	322	82500	83100	82800	11.1	9	-32.14	-9999	-32.13	0.01	78.2514	1.99061	-9999
2000	322	83100	83700	83400	11.6	9.08	-32.3	-9999	-32.38	-0.07886	75.7312	1.68644	-9999
2000	322	83700	84300	84000	12.7	8.65	-32.5	-9999	-32.47	0.03	77.217	1.94681	-9999
2000	322	84300	84900	84600	13.9	8.71	-32.65	-9999	-32.52	0.1297	77.3471	1.72418	-9999
2000	322	84900	85500	85200	16.1	8.45	-32.66	-9999	-32.45	0.2094	78.9054	1.2783	-9999
2000	322	85500	86100	85800	15.7	8.89	-32.56	-9999	-32.48	0.08	78.805	1.83202	-9999
2000	322	86100	86700	86400	16.6	8.5	-32.54	-9999	-32.475	0.125	79.3655	2.12115	-9999
2000	323	300	900	600	17.6	8.19	-32.5	-9999	-9999	-9999	81.7888	1.56593	-9999
2000	323	900	1500	1200	16.6	7.96	-32.5	-9999	-9999	-9999	-9999	-9999	-9999
2000	323	1500	2100	1800	16.7	8.42	-32.43	-9999	-9999	-9999	-9999	-9999	-9999
2000	323	2100	2700	2400	16.8	8.32	-32.48	-9999	-9999	-9999	-9999	-9999	-9999
2000	323	2700	3300	3000	18.3	8.24	-32.6	-9999	-9999	-9999	-9999	-9999	-9999
2000	323	3300	3900	3600	20.3	8.15	-32.66	-9999	-9999	-9999	-9999	-9999	-9999
2000	323	3900	4500	4200	22.5	8.14	-32.74	-9999	-9999	-9999	-9999	-9999	-9999
2000	323	4500	5100	4800	23.7	7.76	-32.9	-9999	-9999	-9999	-9999	-9999	-9999
2000	323	5100	5700	5400	21.7999	7.74	-32.74	-9999	-9999	-9999	-9999	-9999	-9999
2000	323	5700	6300	6000	22.2	7.98	-32.6	-9999	-9999	-9999	-9999	-9999	-9999
2000	323	6300	6900	6600	18.5997	8.2	-32.52	-9999	-9999	-9999	-9999	-9999	-9999
2000	323	6900	7500	7200	15.2	8.57	-32.62	-9999	-9999	-9999	-9999	-9999	-9999
2000	323	7500	8100	7800	17	8.57	-32.74	-9999	-9999	-9999	85.1428	1.69298	-9999
2000	323	8100	8700	8400	18.3	8.25	-32.88	-9999	-9999	-9999	85.0467	2.72329	-9999
2000	323	8700	9300	9000	19.2	8.15	-32.99	-9999	-9999	-9999	85.9102	3.70146	-9999
2000	323	9300	9900	9600	20.2	8.44	-33.12	-9999	-9999	-9999	86.4764	3.1363	-9999
2000	323	9900	10500	10200	21.6	9.14	-33.16	-9999	-9999	-9999	87.2499	1.98962	-9999
2000	323	10500	11100	10800	21.2	9.17	-33.06	-9999	-9999	-9999	85.4371	2.43324	-9999
2000	323	11100	11700	11400	21.8	9.21	-33.18	-9999	-9999	-9999	84.3499	1.52742	-9999
2000	323	11700	12300	12000	23.6	8.87	-33.42	-9999	-9999	-9999	84.7124	2.03218	-9999
2000	323	12300	12900	12600	24.5	8.79	-33.38	-9999	-9999	-9999	84.9015	1.90804	-9999
2000	323	12900	13500	13200	22.7	9.13	-33.16	-9999	-9999	-9999	84.7446	1.88069	-9999
2000	323	13500	14100	13800	21.5	9.1875	-33.2	-9999	-9999	-9999	84.0292	1.96017	-9999
2000	323	14100	14700	14400	-9999	-9999	-9999	-9999	-9999	-9999	-9999	-9999	-9999
2000	323	14700	15300	15000	-9999	-9999	-9999	-9999	-9999	-9999	-9999	-9999	-9999
2000	323	15300	15900	15600	-9999	-9999	-9999	-9999	-9999	-9999	-9999	-9999	-9999
2000	323	15900	16500	16200	-9999	-9999	-9999	-9999	-9999	-9999	-9999	-9999	-9999
2000	323	16500	17100	16800	14	9.6	-33	-9999	-33.1	-0.1	-9999	-9999	-9999
2000	323	17100	17700	17400	13.4	9.19	-33	-9999	-33	0	-9999	-9999	-9999
2000	323	17700	18300	18000	12.8	9.45	-32.95	-9999	-32.94	0.01	-9999	-9999	-9999
2000	323	18300	18900	18600	12.7778	9.43333	-32.97	-9999	-33.07	-0.1	-9999	-9999	-9999
2000	323	18900	19500	19200	12.4	9.23	-33	-9999	-33.03	-0.03	-9999	-9999	-9999
2000	323	19500	20100	19800	13	9.27	-33	-9999	-32.98	0.02	-9999	-9999	-9999
2000	323	20100	20700	20400	12.9	8.79	-33	-9999	-33.03	-0.03	-9999	-9999	-9999
2000	323	20700	21300	21000	14.8	8.55	-33	-9999	-33.02	-0.02	-9999	-9999	-9999
2000	323	21300	21900	21600	15.2	8.39	-32.88	-9999	-32.89	-0.00886	-9999	-9999	-9999
2000	323	21900	22500	22200	15	8.83	-32.74	-9999	-32.8	-0.05544	-9999	-9999	-9999
2000	323	22500	23100	22800	15.7	8.85	-32.86	-9999	-32.89	-0.02829	-9999	-9999	-9999
2000	323	23100	23700	23400	16.8	8.93	-33.12	-9999	-33.1	0.02	-9999	-9999	-9999
2000	323	23700	24300	24000	16.8	9.44	-33.04	-9999	-32.94	0.1	-9999	-9999	-9999
2000	323	24300	24900	24600	16.4	9.62	-32.98	-9999	-32.9	0.08	-9999	-9999	-9999
2000	323	24900	25500	25200	13.2	9.59	-32.91	-9999	-32.94	-0.0294	-9999	-9999	-9999
2000	323	25500	26100	25800	11.7	9.48	-32.97	-9999	-33.05	-0.08	-9999	-9999	-9999
2000	323	26100	26700	26400	11.1	9.29	-32.96	-9999	-32.91	0.05	-9999	-9999	-9999
2000	323	26700	27300	27000	10.6	9.5	-32.97	-9999	-32.9	0.07	73.8124	2.94907	-9999
2000	323	27300	27900	27600	11.5	9.8	-33	-9999	-33.02	-0.02	72.7208	2.19692	-9999
2000	323	27900	28500	28200	10.5	9.75	-33	-9999	-32.99	0.01	73.3283	1.65701	-9999
2000	323	28500	29100	28800	12	9.76	-32.94	-9999	-32.8	0.1392	75.117	2.45023	-9999
2000	323	29100	29700	29400	12.8	9.37	-32.87	-9999	-32.7	0.1684	76.4004	1.61785	-9999
2000	323	29700	30300	30000	11.5	9.43	-32.74	-9999	-32.78	-0.03789	78.9612	1.67161	-9999
2000	323	30300	30900	30600	10.2	9.28	-32.7	-9999	-32.8	-0.0943	77.3091	1.58691	-9999
2000	323	30900	31500	31200	12.2	9.43	-32.82	-9999	-32.76	0.06034	76.2379	2.47976	-9999
2000	323	31500	32100	31800	12.9	9.25	-32.92	-9999	-32.77	0.14897	75.359	1.53504	-9999
2000	323	32100	32700	32400	10.9999	9.73	-33.05	-9999	-32.94	0.11	75.2663	2.20531	-9999
2000	323	32700	33300	33000	12	9.6	-32.76	-9999	-32.76	0.00205	77.2144	1.68145	-9999
2000	323	33300	33900	33600	13.5	9.63	-32.78	-9999	-32.64	0.1388	-9999	-9999	-9999
2000	323	33900	34500	34200	12.5	9.82	-32.62	-9999	-32.58	0.04	-9999	-9999	-9999
2000	323	34500	35100	34800	12.2	9.93	-32.54	-9999	-32.62	-0.08	76.8309	2.06365	-9999
2000	323	35100	35700	35400	12.9	10.05	-32.64	-9999	-32.6	0.04	76.7372	1.61528	-9999
2000	323	35700	36300	36000	12.4	10.27	-32.64	-9999	-32.56	0.08	75.0248	2.31314	-9999
2000	323	36300	36900	36600	13	10.25	-32.6	-9999	-32.59	0.01	78.388	1.58432	-9999
2000	323	36900	37500	37200	12.4	10.23	-32.68	-9999	-32.63	0.05	79.0696	2.0248	-9999
2000	323	37500	38100	37800	10.8	10.27	-32.94	-9999	-32.78	0.1592	76.3663	2.16203	-9999
2000	323	38100	38700	38400	10.3	10.65	-32.83	-9999	-32.73	0.1	75.4424	1.81956	-9999
2000	323	38700	39300	39000	11	9.74	-32.74	-9999	-32.78	-0.03658	76.3544	2.12117	-9999
2000	323	39300	39900	39600	8.99997	9.89	-32.92	-9999	-32.89	0.0304	76.6059	1.74267	-9999
2000	323	39900	40500	40200	9.39999	10.49	-32.59	-9999	-32.61	-0.01943	76.7745	1.84827	-9999
2000	323	40500	41100	40800	10.5	10.38	-32.18	-9999	-32.34	-0.15592	79.3201	1.70563	-9999
2000	323	41100	41700	41400	10.2	10.01	-32.18	-9999	-32.4	-0.2163	80.2395	1.26994	-9999
2000	323	41700	42300	42000	11.6	9.89	-32.41	-9999	-32.45	-0.04	78.8608	1.95494	-9999
2000	323	42300	42900	42600	11.9	10.26	-32.43	-9999	-32.39	0.04	79.9964	1.54709	-9999
2000	323	42900	43500	43200	10.9	9.8	-32.56	-9999	-32.63	-0.07	79.4943	2.24116	-9999
2000	323	43500	44100	43800	12.1	9.69	-32.4	-9999	-32.41	-0.00829	84.6919	1.75336	-9999
2000	323	44100	44700	44400	13.2001	9.9	-32.24	-9999	-32.28	-0.03658	85.2224	1.54745	-9999
2000	323	44700	45300	45000	15.3	9.62	-32.52	-9999	-32.47	0.05	84.2728	2.21381	-9999
2000	323	45300	45900	45600	14.5	9.59	-32.54	-9999	-32.58	-0.04	84.459	2.08771	-9999
2000	323	45900	46500	46200	15.2	9.03	-32.5	-9999	-32.46	0.04	85.1335	1.91477	-9999
2000	323	46500	47100	46800	16.4	9.64	-32.54	-9999	-32.46	0.08	83.7464	1.76625	-9999
2000	323	47100	47700	47400	16.8	9.96	-32.49	-9999	-32.41	0.08	84.1069	1.56809	-9999
2000	323	47700	48300	48000	19.4	9.76	-32.5	-9999	-32.47	0.03	83.9902	2.18859	-9999
2000	323	48300	48900	48600	21.8	9.52	-32.49	-9999	-32.38	0.11	86.1643	2.12346	-9999
2000	323	48900	49500	49200	25	9.57	-32.5	-9999	-32.38	0.12	85.4384	1.62144	-9999
2000	323	49500	50100	49800	27	9.13	-32.5	-9999	-32.49	0.01	88.1617	1.51774	-9999
2000	323	50100	50700	50400	28	9.03	-32.49	-9999	-32.39	0.1	89.3468	2.27488	-9999
2000	323	50700	51300	51000	27.8	9.09	-32.49	-9999	-32.31	0.18	90.8973	1.86713	-9999
2000	323	51300	51900	51600	27.9	8.79	-32.52	-9999	-32.43	0.09	91.9419	1.77738	-9999
2000	323	51900	52500	52200	26.4	8.79	-32.7	-9999	-32.61	0.09	93.3133	1.51755	-9999
2000	323	52500	53100	52800	22.9	9.12	-32.52	-9999	-32.49	0.03	93.4646	1.78864	-9999
2000	323	53100	53700	53400	24	8.99	-32.62	-9999	-32.45	0.17	93.8922	2.20271	-9999
2000	323	53700	54300	54000	25.8	8.73	-32.72	-9999	-32.6	0.1196	97.7117	1.96609	-9999
2000	323	54300	54900	54600	25.5	8.82	-32.7	-9999	-32.62	0.08	97.9128	1.94104	-9999
2000	323	54900	55500	55200	25.8	8.85	-32.7	-9999	-32.54	0.16	98.1208	2.11185	-9999
2000	323	55500	56100	55800	25.3	8.91	-32.7	-9999	-32.52	0.18	99.3081	1.51625	-9999
2000	323	56100	56700	56400	24.6	8.78	-32.72	-9999	-32.62	0.0997	97.4183	1.82382	-9999
2000	323	56700	57300	57000	26.2	8.7	-32.78	-9999	-32.58	0.1988	97.4881	1.44185	-9999
2000	323	57300	57900	57600	27.2	8.33	-32.89	-9999	-32.58	0.3078	97.171	1.96833	-9999
2000	323	57900	58500	58200	29	7.84	-33.01	-9999	-32.8	0.209	95.7286	1.77128	-9999
2000	323	58500	59100	58800	29.6	7.68	-33.12	-9999	-32.89	0.23	96.93	1.71584	-9999
2000	323	59100	59700	59400	26.3	8.17	-33	-9999	-32.75	0.2485	95.295	2.26933	-9999
2000	323	59700	60300	60000	23.8	8.23	-33.02	-9999	-32.74	0.2782	93.7477	2.01689	-9999
2000	323	60300	60900	60600	23.7	8.15	-32.88	-9999	-32.7	0.1785	94.5916	1.60408	-9999
2000	323	60900	61500	61200	27	7.87	-32.7	-9999	-32.56	0.14	93.3882	1.8258	-9999
2000	323	61500	62100	61800	29.2	7.67	-32.68	-9999	-32.48	0.2	94.9811	1.03238e-06	-9999
2000	323	62100	62700	62400	29.6	7.71	-32.52	-9999	-32.48	0.04	-9999	-9999	-9999
2000	323	62700	63300	63000	30.4	7.95	-32.52	-9999	-32.46	0.06	95.7862	2.00947	-9999
2000	323	63300	63900	63600	31.4	8.01	-32.62	-9999	-32.44	0.18	95.1539	2.10694	-9999
2000	323	63900	64500	64200	32.7	7.76	-32.6	-9999	-32.4	0.2	95.2527	2.01164	-9999
2000	323	64500	65100	64800	29.8	7.65	-32.66	-9999	-32.6	0.06	94.9364	1.62908	-9999
2000	323	65100	65700	65400	29.4	7.73	-32.7	-9999	-32.61	0.09	93.9358	2.10944	-9999
2000	323	65700	66300	66000	29.1	8.1	-32.7	-9999	-32.53	0.17	93.871	1.28522	-9999
2000	323	66300	66900	66600	28.1	8.67	-32.68	-9999	-32.51	0.17	90.6198	1.9759	-9999
2000	323	66900	67500	67200	28	8.51	-32.7	-9999	-32.59	0.11	91.9562	1.59656	-9999
2000	323	67500	68100	67800	28.7	8.69	-32.7	-9999	-32.5	0.2	91.5917	1.27847	-9999
2000	323	68100	68700	68400	29.6	8.84	-32.7	-9999	-32.36	0.34	91.9011	1.2234	-9999
2000	323	68700	69300	69000	29.2	8.89	-32.66	-9999	-32.39	0.27	91.7517	2.29626	-9999
2000	323	69300	69900	69600	29.9	8.46	-32.7	-9999	-32.33	0.37	91.4364	1.53054	-9999
2000	323	69900	70500	70200	30.3	8.48	-32.58	-9999	-32.22	0.3585	92.7579	1.51625	-9999
2000	323	70500	71100	70800	30.4	8.23	-32.52	-9999	-32.23	0.2884	93.5325	2.21999	-9999
2000	323	71100	71700	71400	31	7.9	-32.52	-9999	-32.38	0.14	93.3051	2.0695	-9999
2000	323	71700	72300	72000	32.1	8.19	-32.5	-9999	-32.39	0.11	91.6795	1.76195	-9999
2000	323	72300	72900	72600	32.9	8.19	-32.6	-9999	-32.36	0.24	93.073	1.89604	-9999
2000	323	72900	73500	73200	35.8999	8.11	-32.64	-9999	-32.38	0.26	93.3295	1.79057	-9999
2000	323	73500	74100	73800	39.3	7.31	-32.84	-9999	-32.53	0.3087	94.2534	1.81842	-9999
2000	323	74100	74700	74400	42.9	7.07	-32.82	-9999	-32.51	0.3092	95.4881	2.18765	-9999
2000	323	74700	75300	75000	44.7003	7.02	-32.78	-9999	-32.4	0.3798	96.5271	2.75204	-9999
2000	323	75300	75900	75600	41.6005	7.34	-32.76	-9999	-32.45	0.3093	95.4428	2.42358	-9999
2000	323	75900	76500	76200	41.1003	7.19	-32.66	-9999	-32.4	0.2597	94.759	1.28816	-9999
2000	323	76500	77100	76800	39	7.48	-32.54	-9999	-32.26	0.2787	93.1167	1.75376	-9999
2000	323	77100	77700	77400	37.6999	7.61	-32.48	-9999	-32.19	0.288	93.1981	1.94609	-9999
2000	323	77700	78300	78000	36.3001	7.9	-32.54	-9999	-32.23	0.309	92.0726	1.88697	-9999
2000	323	78300	78900	78600	33.3999	7.83	-32.7	-9999	-32.39	0.31	91.4736	1.73027	-9999
2000	323	78900	79500	79200	37	8.05	-32.82	-9999	-32.45	0.3695	92.3963	2.10104	-9999
2000	323	79500	80100	79800	34.8	7.29	-32.89	-9999	-32.59	0.2981	93.5484	1.22506	-9999
2000	323	80100	80700	80400	34.4	7.38	-32.96	-9999	-32.58	0.3785	95.4298	1.03238e-06	-9999
2000	323	80700	81300	81000	35	7.59	-32.86	-9999	-32.41	0.4496	-9999	-9999	-9999
2000	323	81300	81900	81600	36.7	7.72	-32.7	-9999	-32.29	0.41	-9999	-9999	-9999
2000	323	81900	82500	82200	39	7.76	-32.68	-9999	-32.3	0.3797	-9999	-9999	-9999
2000	323	82500	83100	82800	39.3001	7.85	-32.7	-9999	-32.33	0.37	-9999	-9999	-9999
2000	323	83100	83700	83400	38.7999	7.54	-32.7	-9999	-32.43	0.27	-9999	-9999	-9999
2000	323	83700	84300	84000	37.9	7.67	-32.64	-9999	-32.38	0.26	98.6167	2.01608	-9999
2000	323	84300	84900	84600	37	7.81	-32.56	-9999	-32.38	0.18	97.9052	1.87888	-9999
2000	323	84900	85500	85200	35.9	7.37	-32.7	-9999	-32.36	0.34	96.4417	1.5263	-9999
2000	323	85500	86100	85800	36.3	7.3	-32.56	-9999	-32.29	0.2694	91.3397	2.3571	-9999
2000	323	86100	86700	86400	34.5555	7.16667	-32.51	-9999	-32.18	0.3276	89.6026	2.00672	-9999
2000	324	300	900	600	32.8999	7.64	-32.39	-9999	-31.93	0.4594	87.5147	1.90838	-9999
2000	324	900	1500	1200	33.3	7.98	-32.1	-9999	-31.79	0.31	85.6718	1.39413	-9999
2000	324	1500	2100	1800	33.3	7.83	-32.03	-9999	-31.8	0.2293	86.4616	2.27717	-9999
2000	324	2100	2700	2400	30.9	8.1	-32.01	-9999	-31.71	0.2998	85.5883	1.48036	-9999
2000	324	2700	3300	3000	30.2	8.19	-31.81	-9999	-31.59	0.21858	84.8486	2.66753	-9999
2000	324	3300	3900	3600	30.9999	8.18	-31.57	-9999	-31.53	0.04011	82.5	1.46798	-9999
2000	324	3900	4500	4200	30.9	8.11	-31.33	-9999	-31.45	-0.11969	78.7585	2.86002	-9999
2000	324	4500	5100	4800	30.8	7.78	-31.06	-9999	-31.19	-0.12949	76.672	2.32873	-9999
2000	324	5100	5700	5400	30.1002	7.78	-30.79	-9999	-30.94	-0.14887	73.5573	1.80802	-9999
2000	324	5700	6300	6000	31.3	7.44	-30.7	-9999	-30.85	-0.1495	73.0376	1.61481	-9999
2000	324	6300	6900	6600	32.6001	6.94	-30.58	-9999	-30.78	-0.1991	73.0526	1.70249	-9999
2000	324	6900	7500	7200	33	7.39	-30.45	-9999	-30.58	-0.1296	71.6716	1.359	-9999
2000	324	7500	8100	7800	32.1	7.55	-30.3	-9999	-30.35	-0.04958	72.0605	1.63885	-9999
2000	324	8100	8700	8400	32.2	7.6	-30.13	-9999	-30.27	-0.13919	72.6004	1.45505	-9999
2000	324	8700	9300	9000	32.3	7.24	-29.98	-9999	-30.17	-0.18928	73.6147	1.82373	-9999
2000	324	9300	9900	9600	32	7.3	-29.84	-9999	-29.97	-0.12885	72.2846	1.58914	-9999
2000	324	9900	10500	10200	32.7002	7.56	-29.71	-9999	-29.77	-0.05958	73.9123	1.62378	-9999
2000	324	10500	11100	10800	31.3	7.51	-29.42	-9999	-29.51	-0.0899	73.1213	2.03922	-9999
2000	324	11100	11700	11400	32.6	7.08	-29.26	-9999	-29.38	-0.11959	70.9412	2.32768	-9999
2000	324	11700	12300	12000	33.5001	6.82	-29.05	-9999	-29.16	-0.10906	69.8514	1.94402	-9999
2000	324	12300	12900	12600	32.6	6.89	-28.87	-9999	-28.96	-0.08937	68.5489	2.0411	-9999
2000	324	12900	13500	13200	32	7.11	-28.74	-9999	-28.81	-0.0697	68.3723	2.25994	-9999
2000	324	13500	14100	13800	33.5001	6.75	-28.66	-9999	-28.84	-0.1792	-9999	-9999	-9999
2000	324	14100	14700	14400	36.4999	6.71	-28.53	-9999	-28.68	-0.14886	-9999	-9999	-9999
2000	324	14700	15300	15000	36.8	6.83	-28.4	-9999	-28.51	-0.11	69.3002	2.35112	-9999
2000	324	15300	15900	15600	34.4	7.03	-28.24	-9999	-28.35	-0.10906	67.0011	1.17227	-9999
2000	324	15900	16500	16200	30.6999	7.04	-28.15	-9999	-28.36	-0.2088	64.3728	2.3923	-9999
2000	324	16500	17100	16800	29	7.14	-28.08	-9999	-28.22	-0.13834	63.0149	1.45633	-9999
2000	324	17100	17700	17400	29.3	7.28	-27.95	-9999	-28.08	-0.13	62.8208	1.57325	-9999
2000	324	17700	18300	18000	30.8	7.43	-27.87	-9999	-27.97	-0.09937	62.6907	1.12536	-9999
2000	324	18300	18900	18600	27.7999	7.98	-27.81	-9999	-27.96	-0.14866	61.6364	1.21981	-9999
2000	324	18900	19500	19200	28.5	8.11	-27.8	-9999	-27.96	-0.15856	61.2079	1.86285	-9999
2000	324	19500	20100	19800	28.9002	7.85	-27.78	-9999	-27.89	-0.10822	62.3601	2.19185	-9999
2000	324	20100	20700	20400	30.8002	7.87	-27.7	-9999	-27.83	-0.1297	60.5295	1.63663	-9999
2000	324	20700	21300	21000	33.4	8.1	-27.7	-9999	-27.83	-0.1296	62.7375	1.86082	-9999
2000	324	21300	21900	21600	33.5001	8.62	-27.71	-9999	-27.9	-0.18889	60.6288	1.7698	-9999
2000	324	21900	22500	22200	33.4999	8.57	-27.7	-9999	-27.83	-0.1297	62.641	1.33088	-9999
2000	324	22500	23100	22800	33.6	8.2	-27.69	-9999	-27.78	-0.0899	61.0037	2.25084	-9999
2000	324	23100	23700	23400	30.4	8.36	-27.65	-9999	-27.77	-0.11907	59.0451	1.98978	-9999
2000	324	23700	24300	24000	28.6	7.72	-27.7	-9999	-27.9	-0.199	59.8373	1.88285	-9999
2000	324	24300	24900	24600	35.6998	8.11	-27.76	-9999	-27.91	-0.14845	62.2129	2.80875	-9999
2000	324	24900	25500	25200	31	8.08	-27.77	-9999	-27.9	-0.12823	58.8419	1.85077	-9999
2000	324	25500	26100	25800	30.7	7.98	-27.75	-9999	-27.85	-0.09895	59.5451	2.26179	-9999
2000	324	26100	26700	26400	31.5	7.93	-27.78	-9999	-27.97	-0.18887	59.9718	2.22426	-9999
2000	324	26700	27300	27000	31.0992	7.65	-27.8	-9999	-28	-0.199	60.6568	1.58638	-9999
2000	324	27300	27900	27600	32.9999	7.56	-27.82	-9999	-28	-0.1792	60.5564	2.31075	-9999
2000	324	27900	28500	28200	33.6	7.41	-27.84	-9999	-27.99	-0.14929	62.553	1.68554	-9999
2000	324	28500	29100	28800	36.2003	7.61	-27.85	-9999	-28.08	-0.2295	63.4615	2.20107	-9999
2000	324	29100	29700	29400	37.9995	7.61	-27.9	-9999	-28.17	-0.27	64.5977	2.36076	-9999
2000	324	29700	30300	30000	39.3998	7.99	-28	-9999	-28.2	-0.199	63.0299	1.42838	-9999
2000	324	30300	30900	30600	42.1	7.18	-28	-9999	-28.2	-0.199	65.8283	1.42949	-9999
2000	324	30900	31500	31200	39.5001	7.17	-28	-9999	-28.21	-0.2095	68.098	1.95251	-9999
2000	324	31500	32100	31800	40.5	6.87	-28	-9999	-28.22	-0.2192	70.77	2.22702	-9999
2000	324	32100	32700	32400	40.3	7.15	-27.93	-9999	-28.05	-0.11917	75.2985	2.36371	-9999
2000	324	32700	33300	33000	39.7001	6.39	-28.27	-9999	-28.32	-0.04937	79.1149	1.73252	-9999
2000	324	33300	33900	33600	41.4998	5.57	-28.83	-9999	-28.72	0.10969	82.4665	1.24019	-9999
2000	324	33900	34500	34200	44.2	5.38	-29.13	-9999	-28.98	0.14958	89.0406	2.63622	-9999
2000	324	34500	35100	34800	46.8997	5.83	-29.36	-9999	-29.24	0.11928	89.0726	3.42136	-9999
2000	324	35100	35700	35400	48.1	5.8	-29.18	-9999	-29.16	0.02	94.4483	1.71699	-9999
2000	324	35700	36300	36000	46.9	5.53	-29.39	-9999	-29.27	0.11886	98.3062	2.11077	-9999
2000	324	36300	36900	36600	48.1	5.21	-29.52	-9999	-29.3	0.21929	102.931	1.91266	-9999
2000	324	36900	37500	37200	47.5007	5.01	-29.66	-9999	-29.46	0.19969	108.639	2.77929	-9999
2000	324	37500	38100	37800	43.1	5.51	-29.65	-9999	-29.49	0.1596	102.95	2.93932	-9999
2000	324	38100	38700	38400	43.6	6.03	-29.93	-9999	-29.64	0.2888	101.682	1.77918	-9999
2000	324	38700	39300	39000	45.4	5.76	-30.35	-9999	-29.87	0.4799	99.874	1.79713	-9999
2000	324	39300	39900	39600	49.5	5.22	-30.23	-9999	-29.93	0.2996	103.882	3.21547	-9999
2000	324	39900	40500	40200	47.8997	5.24	-29.82	-9999	-29.76	0.05949	114.269	1.80245	-9999
2000	324	40500	41100	40800	42.5001	5.09	-29.69	-9999	-29.38	0.3097	117.752	1.43577	-9999
2000	324	41100	41700	41400	38.5	5.35	-29.37	-9999	-29.04	0.3289	105.433	3.1123	-9999
2000	324	41700	42300	42000	41	5.37	-29.54	-9999	-29.14	0.3994	107.113	3.13019	-9999
2000	324	42300	42900	42600	41.4	5.13	-30.03	-9999	-29.46	0.5693	102.845	5.55911	-9999
2000	324	42900	43500	43200	39.1	5.24	-29.73	-9999	-29.39	0.3391	110.855	4.76252	-9999
2000	324	43500	44100	43800	37.6	5.33	-29.87	-9999	-29.6	0.2691	100.881	2.68347	-9999
2000	324	44100	44700	44400	34.3003	5.52	-29.47	-9999	-29.19	0.2795	104.745	1.94554	-9999
2000	324	44700	45300	45000	27.1	6.12	-29.16	-9999	-28.82	0.3396	104.627	2.35196	-9999
2000	324	45300	45900	45600	24.2	5.96	-29.46	-9999	-28.99	0.4696	104.253	3.3209	-9999
2000	324	45900	46500	46200	23.1001	6.11	-29.45	-9999	-29	0.4496	101.181	3.5955	-9999
2000	324	46500	47100	46800	23.3	5.83	-29.39	-9999	-29.04	0.3483	106.166	2.02308	-9999
2000	324	47100	47700	47400	21.9	6.1	-29.61	-9999	-29.14	0.4692	102.79	3.49935	-9999
2000	324	47700	48300	48000	22.9	5.84	-29.47	-9999	-29.26	0.20959	101.686	2.2639	-9999
2000	324	48300	48900	48600	22.2	5.99	-29.1	-9999	-29.07	0.02958	91.1936	3.16919	-9999
2000	324	48900	49500	49200	16.1999	6.28	-28.94	-9999	-29.02	-0.07979	91.9886	1.5024	-9999
2000	324	49500	50100	49800	16.7002	5.56	-28.49	-9999	-28.67	-0.17908	94.7368	3.91245	-9999
2000	324	50100	50700	50400	17.6	5.5	-28.32	-9999	-28.48	-0.15939	91.7676	2.47946	-9999
2000	324	50700	51300	51000	15.4	5.74	-28.18	-9999	-28.31	-0.12886	88.7374	1.5984	-9999
2000	324	51300	51900	51600	14.6	6.39	-28.11	-9999	-28.22	-0.10969	-9999	-9999	-9999
2000	324	51900	52500	52200	15.7	5.97	-28.26	-9999	-28.34	-0.07917	-9999	-9999	-9999
2000	324	52500	53100	52800	16.8	6.34	-28.4	-9999	-28.38	0.01979	93.0682	4.77296	-9999
2000	324	53100	53700	53400	19.1	5.96	-28.78	-9999	-28.71	0.07	89.7903	4.67157	-9999
2000	324	53700	54300	54000	18.5	6.16	-28.6	-9999	-28.65	-0.04959	94.4591	1.53407	-9999
2000	324	54300	54900	54600	19.1	6.17	-28.43	-9999	-28.65	-0.2197	93.6283	2.25813	-9999
2000	324	54900	55500	55200	19.3	6.14	-28.28	-9999	-28.51	-0.2294	93.1056	2.28975	-9999
2000	324	55500	56100	55800	19.2	5.65	-27.93	-9999	-28.18	-0.2489	98.8369	4.12553	-9999
2000	324	56100	56700	56400	19.7	5.72	-27.58	-9999	-27.78	-0.19889	100.889	2.52548	-9999
2000	324	56700	57300	57000	18.6001	5.23	-28.09	-9999	-28.11	-0.01979	98.1495	3.03666	-9999
2000	324	57300	57900	57600	22.7001	4.54	-28.09	-9999	-28.22	-0.12855	103.561	2.15959	-9999
2000	324	57900	58500	58200	25.4	4.28	-28.1	-9999	-28.27	-0.16867	100.351	3.26762	-9999
2000	324	58500	59100	58800	21.6004	4.69	-27.99	-9999	-28.16	-0.16939	89.8992	2.39139	-9999
2000	324	59100	59700	59400	15.5	5.59	-27.67	-9999	-27.8	-0.12865	83.736	1.98101	-9999
2000	324	59700	60300	60000	12.9	5.65	-27.58	-9999	-27.82	-0.2382	82.9338	2.30444	-9999
2000	324	60300	60900	60600	13.0999	5.54	-27.63	-9999	-27.85	-0.2186	84.0258	1.58042	-9999
2000	324	60900	61500	61200	8.09995	5.76	-27.68	-9999	-27.8	-0.1195	87.5928	2.64055	-9999
2000	324	61500	62100	61800	5.89998	5.38	-27.87	-9999	-27.83	0.03916	88.0652	1.48075	-9999
2000	324	62100	62700	62400	5.7	5.79	-27.63	-9999	-27.67	-0.03979	83.689	3.17904	-9999
2000	324	62700	63300	63000	6.10001	5.77	-27.35	-9999	-27.57	-0.2197	79.7248	2.33573	-9999
2000	324	63300	63900	63600	6.79998	5.9	-27.18	-9999	-27.37	-0.1893	78.0057	2.57543	-9999
2000	324	63900	64500	64200	3.40009	6.27	-27.07	-9999	-27.22	-0.14845	76.1565	3.29432	-9999
2000	324	64500	65100	64800	0.700007	6.28	-27.2	-9999	-27.2	0.00052	75.1134	1.93086	-9999
2000	324	65100	65700	65400	0.300048	6.34	-27.12	-9999	-27.16	-0.0398	75.4903	1.88658	-9999
2000	324	65700	66300	66000	358.6	6.4	-26.83	-9999	-27.03	-0.1997	73.6902	1.76638	-9999
2000	324	66300	66900	66600	356.8	6.56	-26.52	-9999	-26.71	-0.1894	73.0374	1.68156	-9999
2000	324	66900	67500	67200	357.1	6.87	-26.3	-9999	-26.42	-0.11865	72.7956	1.94461	-9999
2000	324	67500	68100	67800	352.7	6.94	-26.23	-9999	-26.33	-0.09948	70.7812	2.27371	-9999
2000	324	68100	68700	68400	351	6.89	-26.19	-9999	-26.36	-0.1692	69.7093	1.70419	-9999
2000	324	68700	69300	69000	353.7	6.63	-26.11	-9999	-26.34	-0.2284	69.8198	1.5283	-9999
2000	324	69300	69900	69600	353	6.79	-26	-9999	-26.25	-0.2495	69.4575	1.85796	-9999
2000	324	69900	70500	70200	352.8	6.7	-25.96	-9999	-26.12	-0.1598	65.8767	2.50117	-9999
2000	324	70500	71100	70800	352.4	6.43	-25.89	-9999	-26.1	-0.21	65.6337	1.4564	-9999
2000	324	71100	71700	71400	348.8	6.59	-25.89	-9999	-26.15	-0.2599	62.9349	1.68507	-9999
2000	324	71700	72300	72000	347.5	6.46	-25.97	-9999	-26.14	-0.1698	61.6854	1.73714	-9999
2000	324	72300	72900	72600	345.2	6.61	-25.83	-9999	-25.95	-0.11907	55.2343	2.22992	-9999
2000	324	72900	73500	73200	341.7	6.63	-25.57	-9999	-25.72	-0.14908	153.436	290.033	-9999
2000	324	73500	74100	73800	339	7.39	-25.46	-9999	-25.6	-0.14	47.9836	2.68754	-9999
2000	324	74100	74700	74400	337.2	6.98	-25.54	-9999	-25.78	-0.2384	48.5031	3.07134	-9999
2000	324	74700	75300	75000	337.7	6.74	-25.63	-9999	-25.8	-0.1693	53.3723	2.50235	-9999
2000	324	75300	75900	75600	340.3	7.17	-25.75	-9999	-25.91	-0.1594	48.6792	2.11734	-9999
2000	324	75900	76500	76200	338.3	5.8	-26.26	-9999	-26.22	0.04	55.7341	3.12371	-9999
2000	324	76500	77100	76800	338	5.28	-26.4	-9999	-26.36	0.03958	57.0793	3.27168	-9999
2000	324	77100	77700	77400	335.6	5.64	-26.01	-9999	-26.12	-0.10969	49.6961	3.12164	-9999
2000	324	77700	78300	78000	333.5	5.57	-25.52	-9999	-25.8	-0.2792	45.0272	1.05857	-9999
2000	324	78300	78900	78600	345.803	5.34	-25.4	-9999	-25.65	-0.25	-9999	-9999	-9999
2000	324	78900	79500	79200	350.7	6.23	-25.32	-9999	-25.57	-0.2499	-9999	-9999	-9999
2000	324	79500	80100	79800	349	5.91	-25.25	-9999	-25.47	-0.21917	-9999	-9999	-9999
2000	324	80100	80700	80400	355.001	6.26	-25.57	-9999	-25.58	-0.00979	65.8816	3.4914	-9999
2000	324	80700	81300	81000	354.7	6.58	-25.85	-9999	-25.98	-0.12948	65.8167	3.29843	-9999
2000	324	81300	81900	81600	352.9	6.52	-26.06	-9999	-26.2	-0.13834	61.9841	2.17555	-9999
2000	324	81900	82500	82200	356.7	6.72	-26.32	-9999	-26.46	-0.13918	65.039	2.49326	-9999
2000	324	82500	83100	82800	358.8	6.52	-26.89	-9999	-26.9	-0.00979	67.1114	1.40825	-9999
2000	324	83100	83700	83400	3.69886	6.19	-27.38	-9999	-27.22	0.15918	73.1891	3.39111	-9999
2000	324	83700	84300	84000	6.80002	5.88	-28.06	-9999	-27.4	0.6597	107.549	59.1629	-9999
2000	324	84300	84900	84600	5.9	5.52	-28.84	-9999	-27.55	1.2897	82.0107	2.76843	-9999
2000	324	84900	85500	85200	5.7	5.86	-28.83	-9999	-27.14	1.69	89.1491	4.04181	-9999
2000	324	85500	86100	85800	6.60001	6.04	-28.37	-9999	-27.04	1.33	87.9464	4.04841	-9999
2000	324	86100	86700	86400	6.77778	5.96667	-27.96	-9999	-27.08	0.8784	94.2218	2.02491	-9999
2000	325	300	900	600	3.39997	6.06	-27.93	-9999	-27.15	0.7791	94.3629	2.3135	-9999
2000	325	900	1500	1200	358.3	6.66	-27.15	-9999	-26.88	0.26938	83.3037	7.26513	-9999
2000	325	1500	2100	1800	358.8	6.6	-26.99	-9999	-26.83	0.1596	75.2001	1.39847	-9999
2000	325	2100	2700	2400	359.5	6.64	-26.63	-9999	-26.52	0.10969	73.9643	2.31621	-9999
2000	325	2700	3300	3000	1.29977	6.4	-26.56	-9999	-26.4	0.15959	70.5461	0.535071	-9999
2000	325	3300	3900	3600	5	6.04	-26.11	-9999	-26.09	0.02	-9999	-9999	-9999
2000	325	3900	4500	4200	5.20014	5.82	-25.68	-9999	-25.68	0	-9999	-9999	-9999
2000	325	4500	5100	4800	358.8	6.45	-25.46	-9999	-25.5	-0.04	346.009	678.088	-9999
2000	325	5100	5700	5400	1.50002	6.45	-25.56	-9999	-25.6	-0.04	66.479	0.954825	-9999
2000	325	5700	6300	6000	359.7	6.69	-25.64	-9999	-25.57	0.06916	65.4024	1.79633	-9999
2000	325	6300	6900	6600	358.2	7.18	-25.51	-9999	-25.48	0.03	59.8429	2.73976	-9999
2000	325	6900	7500	7200	354.4	7.56	-25.37	-9999	-25.38	-0.00958	55.6774	1.7153	-9999
2000	325	7500	8100	7800	351.4	8.33	-25.23	-9999	-25.4	-0.16919	54.8654	1.26774	-9999
2000	325	8100	8700	8400	350.8	8.27	-25.4	-9999	-25.68	-0.2798	51.9241	1.87549	-9999
2000	325	8700	9300	9000	351.8	8.13	-25.55	-9999	-25.79	-0.2394	52.1305	2.45451	-9999
2000	325	9300	9900	9600	354.9	8.42	-25.6	-9999	-25.8	-0.199	59.8862	9.82072	-9999
2000	325	9900	10500	10200	353.1	8.1	-25.67	-9999	-25.8	-0.1297	56.1485	2.97613	-9999
2000	325	10500	11100	10800	355.5	7.79	-25.73	-9999	-25.93	-0.1992	55.6	2.0833	-9999
2000	325	11100	11700	11400	358.2	7.58	-26.04	-9999	-26.2	-0.15855	59.0283	1.49846	-9999
2000	325	11700	12300	12000	357.3	7.57	-26.1	-9999	-26.15	-0.04916	59.9129	2.13509	-9999
2000	325	12300	12900	12600	0.600039	7.37	-26.06	-9999	-26.12	-0.05958	62.4104	1.7813	-9999
2000	325	12900	13500	13200	3.10004	7.33	-26.06	-9999	-26.1	-0.04	63.414	1.35988	-9999
2000	325	13500	14100	13800	1.39997	7.89	-25.95	-9999	-26.04	-0.0899	62.9779	1.97854	-9999
2000	325	14100	14700	14400	2.10004	7.43	-26.16	-9999	-26.29	-0.12969	60.5752	1.5452	-9999
2000	325	14700	15300	15000	2.00003	7.08	-26.18	-9999	-26.23	-0.04958	64.1475	1.68435	-9999
2000	325	15300	15900	15600	2.40006	7.46	-26.22	-9999	-26.23	-0.01	62.0832	1.50618	-9999
2000	325	15900	16500	16200	2.90001	7.66	-26.26	-9999	-26.29	-0.03	60.0172	1.86865	-9999
2000	325	16500	17100	16800	1.1	7.52	-26.2	-9999	-26.28	-0.07979	56.8844	1.91959	-9999
2000	325	17100	17700	17400	358.8	7.74	-26.23	-9999	-26.38	-0.14866	57.3386	2.03097	-9999
2000	325	17700	18300	18000	0.900025	7.48	-26.25	-9999	-26.39	-0.13897	62.86	2.26047	-9999
2000	325	18300	18900	18600	3.19991	7.42	-26.35	-9999	-26.52	-0.1695	60.382	1.38991	-9999
2000	325	18900	19500	19200	3.19998	7.55	-26.4	-9999	-26.53	-0.13	61.2218	1.46434	-9999
2000	325	19500	20100	19800	1.39993	7.79	-26.23	-9999	-26.33	-0.09928	63.8907	2.13645	-9999
2000	325	20100	20700	20400	358.3	7.84	-26.15	-9999	-26.3	-0.14865	64.791	1.28004	-9999
2000	325	20700	21300	21000	358.2	7.75	-26.29	-9999	-26.48	-0.1891	62.622	1.99092	-9999
2000	325	21300	21900	21600	359	7.87	-26.4	-9999	-26.54	-0.14	60.226	1.93114	-9999
2000	325	21900	22500	22200	356.2	7.92	-26.38	-9999	-26.54	-0.15969	60.6211	1.32344	-9999
2000	325	22500	23100	22800	353.4	8.26	-26.29	-9999	-26.45	-0.1594	58	2.93276	-9999
2000	325	23100	23700	23400	354.4	7.88	-26.4	-9999	-26.58	-0.18	58.2777	1.53283	-9999
2000	325	23700	24300	24000	356.3	7.19	-26.54	-9999	-26.7	-0.15919	59.8199	1.58453	-9999
2000	325	24300	24900	24600	354.7	7.47	-26.44	-9999	-26.62	-0.17969	60.2139	3.3078	-9999
2000	325	24900	25500	25200	353.4	7.63	-26.53	-9999	-26.67	-0.13885	55.7121	2.36414	-9999
2000	325	25500	26100	25800	352.3	7.6	-26.67	-9999	-26.8	-0.1297	53.1025	1.95897	-9999
2000	325	26100	26700	26400	347.699	8.52	-26.63	-9999	-26.77	-0.13855	45.7092	3.16549	-9999
2000	325	26700	27300	27000	348.5	8.87	-26.89	-9999	-27.03	-0.13928	44.7867	1.5911	-9999
2000	325	27300	27900	27600	347.1	8.95	-27.25	-9999	-27.41	-0.15856	45.7598	2.12189	-9999
2000	325	27900	28500	28200	347.8	9.07	-27.36	-9999	-27.54	-0.1798	49.9296	1.83092	-9999
2000	325	28500	29100	28800	348.4	8.71	-27.47	-9999	-27.61	-0.13927	53.8929	1.86846	-9999
2000	325	29100	29700	29400	346.9	8.77	-27.61	-9999	-27.7	-0.08864	55.0068	2.03176	-9999
2000	325	29700	30300	30000	345.4	8.93	-27.8	-9999	-27.82	-0.01958	52.6954	2.00778	-9999
2000	325	30300	30900	30600	343.8	8.94	-27.76	-9999	-27.87	-0.10886	52.1658	1.68735	-9999
2000	325	30900	31500	31200	346.2	8.84	-27.69	-9999	-27.9	-0.2093	54.8691	2.26693	-9999
2000	325	31500	32100	31800	347.6	8.51	-27.78	-9999	-27.83	-0.04979	53.6423	3.30274	-9999
2000	325	32100	32700	32400	350	8.43	-27.78	-9999	-27.86	-0.07959	50.4203	1.31894	-9999
2000	325	32700	33300	33000	348.4	7.71	-28.01	-9999	-28.06	-0.04937	47.1382	1.93504	-9999
2000	325	33300	33900	33600	348.6	7.32	-28.26	-9999	-28.29	-0.03	50.7686	2.35069	-9999
2000	325	33900	34500	34200	348.8	7.19	-28.55	-9999	-28.32	0.23	51.2459	1.51336	-9999
2000	325	34500	35100	34800	346.9	7.31	-27.98	-9999	-27.88	0.0998	49.5389	1.26301	-9999
2000	325	35100	35700	35400	350.3	7.14	-27.95	-9999	-27.88	0.07	-9999	-9999	-9999
2000	325	35700	36300	36000	351.6	6.72	-27.82	-9999	-27.78	0.03969	-9999	-9999	-9999
2000	325	36300	36900	36600	350.9	6.9	-27.69	-9999	-27.86	-0.16939	-9999	-9999	-9999
2000	325	36900	37500	37200	350.4	7.47	-27.37	-9999	-27.66	-0.29	43.9022	1.60408	-9999
2000	325	37500	38100	37800	349.5	8.16	-27.22	-9999	-27.5	-0.2798	42.6772	1.71069	-9999
2000	325	38100	38700	38400	354.3	7.4	-27.1	-9999	-27.37	-0.2679	43.6532	1.54759	-9999
2000	325	38700	39300	39000	0.399894	7.31	-27	-9999	-27.3	-0.2994	44.1023	2.20103	-9999
2000	325	39300	39900	39600	357.1	7.67	-27.02	-9999	-27.41	-0.3888	42.033	1.23956	-9999
2000	325	39900	40500	40200	358	7.9	-27.03	-9999	-27.37	-0.3387	43.0383	2.0741	-9999
2000	325	40500	41100	40800	355.1	8.44	-26.89	-9999	-27.22	-0.3299	43.4542	1.8914	-9999
2000	325	41100	41700	41400	353	8.33	-26.84	-9999	-27.2	-0.3594	-9999	-9999	-9999
2000	325	41700	42300	42000	352.2	8.1	-26.87	-9999	-27.27	-0.3997	-9999	-9999	-9999
2000	325	42300	42900	42600	356.2	8.18	-26.74	-9999	-27.15	-0.4096	45.4588	1.40711	-9999
2000	325	42900	43500	43200	356.2	8.97	-26.59	-9999	-26.92	-0.3276	43.0067	1.3549	-9999
2000	325	43500	44100	43800	354.3	8.59	-26.47	-9999	-26.77	-0.3	42.3069	1.95428	-9999
2000	325	44100	44700	44400	349	8.7	-26.36	-9999	-26.64	-0.28	41.4154	3.23844	-9999
2000	325	44700	45300	45000	347.9	8.49	-26.33	-9999	-26.69	-0.3594	42.5104	1.79598	-9999
2000	325	45300	45900	45600	346.5	7.81	-26.37	-9999	-26.7	-0.3295	38.5834	1.19371	-9999
2000	325	45900	46500	46200	345.4	8.38	-26.36	-9999	-26.59	-0.2296	37.3707	0.943965	-9999
2000	325	46500	47100	46800	342.9	8.82	-26.23	-9999	-26.4	-0.16887	37.8996	1.44824	-9999
2000	325	47100	47700	47400	343.4	8.65	-26.11	-9999	-26.36	-0.248	38.1854	2.15064	-9999
2000	325	47700	48300	48000	342	8.29	-26.16	-9999	-26.4	-0.23789	40.2607	2.03516	-9999
2000	325	48300	48900	48600	347.3	7.5	-26.28	-9999	-26.46	-0.1794	43.3991	2.40189	-9999
2000	325	48900	49500	49200	349.2	8.63	-26.05	-9999	-26.31	-0.25918	43.7189	2.45431	-9999
2000	325	49500	50100	49800	347.7	9.55	-26.53	-9999	-26.79	-0.259	41.7377	2.4719	-9999
2000	325	50100	50700	50400	349.2	8.17	-27.06	-9999	-27.35	-0.2895	43.9951	3.39893	-9999
2000	325	50700	51300	51000	350.6	6.56	-27.55	-9999	-27.83	-0.2786	50.7441	2.25813	-9999
2000	325	51300	51900	51600	349.8	5.91	-27.81	-9999	-28.02	-0.2096	51.5482	1.65325	-9999
2000	325	51900	52500	52200	349.4	5.61	-27.97	-9999	-28.1	-0.13	50.8616	1.5121	-9999
2000	325	52500	53100	52800	349.1	5.52	-28.05	-9999	-28.1	-0.05	52.0854	1.44124	-9999
2000	325	53100	53700	53400	352.3	5.26	-28.09	-9999	-28.2	-0.10959	52.8129	2.70073	-9999
2000	325	53700	54300	54000	0.700358	4.3	-28.16	-9999	-28.3	-0.1396	54.6685	2.00271	-9999
2000	325	54300	54900	54600	354.2	4.83	-28.22	-9999	-28.25	-0.03021	54.4761	1.38748	-9999
2000	325	54900	55500	55200	347.8	6.53	-28.19	-9999	-28.06	0.12908	54.596	1.60432	-9999
2000	325	55500	56100	55800	347.4	6.71	-28.11	-9999	-27.9	0.21	54.4548	1.10618	-9999
2000	325	56100	56700	56400	351.7	6.2	-28.14	-9999	-28.04	0.09927	53.2023	1.87722	-9999
2000	325	56700	57300	57000	355.6	5.7	-28.21	-9999	-28.1	0.10801	54.8697	2.12939	-9999
2000	325	57300	57900	57600	353.7	6.17	-28.2	-9999	-27.98	0.2192	55.8775	1.87568	-9999
2000	325	57900	58500	58200	353.4	6.37	-28.17	-9999	-27.88	0.2896	56.7809	1.7791	-9999
2000	325	58500	59100	58800	347.7	7.95	-27.95	-9999	-27.68	0.2687	53.4547	1.942	-9999
2000	325	59100	59700	59400	347	7.46	-27.97	-9999	-27.73	0.23939	53.6658	1.41717	-9999
2000	325	59700	60300	60000	348.8	6.87	-28.05	-9999	-27.78	0.2696	55.8432	1.98288	-9999
2000	325	60300	60900	60600	351.6	6.54	-27.98	-9999	-27.7	0.2798	56.1307	1.8516	-9999
2000	325	60900	61500	61200	354.9	6.52	-28.08	-9999	-27.74	0.3399	56.4777	1.28635	-9999
2000	325	61500	62100	61800	354.3	6.62	-28.24	-9999	-27.84	0.3998	58.2165	1.63492	-9999
2000	325	62100	62700	62400	354.6	6.34	-28.24	-9999	-27.9	0.3394	59.0778	1.77435	-9999
2000	325	62700	63300	63000	356.7	6.23	-28.14	-9999	-27.74	0.4	60.427	2.05667	-9999
2000	325	63300	63900	63600	358.1	6.19	-28.15	-9999	-27.75	0.3997	62.4357	1.35283	-9999
2000	325	63900	64500	64200	354.6	6.54	-28.19	-9999	-27.8	0.3892	57.6759	2.12507	-9999
2000	325	64500	65100	64800	353.4	6.47	-27.94	-9999	-27.92	0.02	54.3088	2.05309	-9999
2000	325	65100	65700	65400	352.4	6.41	-27.67	-9999	-27.78	-0.10896	52.3743	1.44483	-9999
2000	325	65700	66300	66000	350.8	6.45	-27.49	-9999	-27.67	-0.1793	50.8441	1.47666	-9999
2000	325	66300	66900	66600	346.5	6.42	-27.45	-9999	-27.47	-0.01979	47.5534	2.68863	-9999
2000	325	66900	67500	67200	345.9	5.8	-27.23	-9999	-27.33	-0.09937	44.949	1.87438	-9999
2000	325	67500	68100	67800	342.4	6.09	-27.04	-9999	-27.16	-0.11938	40.8701	2.12679	-9999
2000	325	68100	68700	68400	341.8	6.22	-26.97	-9999	-26.98	-0.01	37.5372	2.11953	-9999
2000	325	68700	69300	69000	343.4	6.56	-26.82	-9999	-26.84	-0.01958	37.1826	1.17101	-9999
2000	325	69300	69900	69600	343.6	6.67	-26.56	-9999	-26.62	-0.05979	37.8515	1.25374	-9999
2000	325	69900	70500	70200	345.6	6.83	-26.34	-9999	-26.52	-0.1798	39.4465	1.24218	-9999
2000	325	70500	71100	70800	348.601	5.9	-26.2	-9999	-26.45	-0.2495	41.3819	1.57442	-9999
2000	325	71100	71700	71400	340.8	6.7	-26.01	-9999	-26.12	-0.10949	39.9229	2.20884	-9999
2000	325	71700	72300	72000	328.199	7.87	-25.48	-9999	-25.46	0.02	33.8886	1.32011	-9999
2000	325	72300	72900	72600	329.1	7.7	-25.2	-9999	-25.26	-0.05979	33.2067	2.21364	-9999
2000	325	72900	73500	73200	327.5	7.49	-25.09	-9999	-25.19	-0.09907	32.0116	1.68785	-9999
2000	325	73500	74100	73800	325.7	7.73	-24.99	-9999	-25.17	-0.17919	31.5239	1.90057	-9999
2000	325	74100	74700	74400	327.8	6.87	-24.98	-9999	-25.1	-0.1199	31.6658	1.73552	-9999
2000	325	74700	75300	75000	325.9	6.24	-24.83	-9999	-24.93	-0.09885	30.7634	1.59786	-9999
2000	325	75300	75900	75600	323.1	5.28	-24.63	-9999	-24.75	-0.11938	31.1989	2.03097	-9999
2000	325	75900	76500	76200	316.201	6.62	-24.29	-9999	-24.38	-0.08937	26.3899	1.98304	-9999
2000	325	76500	77100	76800	317.2	7.83	-24.34	-9999	-24.51	-0.1697	25.4792	2.72147	-9999
2000	325	77100	77700	77400	323.4	7.99	-24.6	-9999	-24.67	-0.06958	29.1921	1.28003	-9999
2000	325	77700	78300	78000	324.301	7.64	-24.84	-9999	-25.02	-0.17918	28.2645	2.14439	-9999
2000	325	78300	78900	78600	323.2	8.47	-24.91	-9999	-25.09	-0.18	27.2125	1.7633	-9999
2000	325	78900	79500	79200	328.2	7.57	-24.97	-9999	-25.12	-0.1498	28.6553	3.65002e-07	-9999
2000	325	79500	80100	79800	330.5	7.19	-25.03	-9999	-25.29	-0.2587	-9999	-9999	-9999
2000	325	80100	80700	80400	330.9	7.07	-25.1	-9999	-25.38	-0.2774	32.1449	1.51725	-9999
2000	325	80700	81300	81000	331.5	6.64	-25.15	-9999	-25.4	-0.248	31.781	1.45489	-9999
2000	325	81300	81900	81600	330.9	6.68	-25.13	-9999	-25.36	-0.2284	30.4592	1.59123	-9999
2000	325	81900	82500	82200	330.3	6.86	-25.11	-9999	-25.26	-0.14887	30.3535	1.1953	-9999
2000	325	82500	83100	82800	330.9	6.9	-25	-9999	-25.22	-0.2192	30.3095	1.25137	-9999
2000	325	83100	83700	83400	336.3	6.85	-25	-9999	-25.31	-0.3099	31.6689	2.72221	-9999
2000	325	83700	84300	84000	339.2	7.5	-25.01	-9999	-25.3	-0.2899	30.4795	1.73252	-9999
2000	325	84300	84900	84600	341.6	6.72	-25	-9999	-25.3	-0.3	32.5594	1.75452	-9999
2000	325	84900	85500	85200	343.5	7.46	-25.02	-9999	-25.3	-0.2798	32.3712	1.60838	-9999
2000	325	85500	86100	85800	348.201	7.44	-25.08	-9999	-25.35	-0.2682	37.4106	2.21098	-9999
2000	325	86100	86700	86400	356.4	7.12	-25.13	-9999	-25.44	-0.3091	38.4854	1.88356	-9999
2000	326	300	900	600	0.700199	6.73	-25.25	-9999	-25.61	-0.36	40.2533	1.64307	-9999
2000	326	900	1500	1200	353.799	6.82	-25.39	-9999	-25.68	-0.2899	38.674	2.35558	-9999
2000	326	1500	2100	1800	354.399	6.58	-25.63	-9999	-25.9	-0.2692	43.012	1.4897	-9999
2000	326	2100	2700	2400	351.8	6.35	-26	-9999	-26.22	-0.21919	44.7437	2.35593	-9999
2000	326	2700	3300	3000	348.7	6.53	-25.98	-9999	-26.3	-0.3194	43.1453	1.76605	-9999
2000	326	3300	3900	3600	345.901	6.46	-26.26	-9999	-26.5	-0.2394	42.2567	2.809	-9999
2000	326	3900	4500	4200	345	6.27	-26.4	-9999	-26.59	-0.19	47.5836	2.90091	-9999
2000	326	4500	5100	4800	353.602	6.06	-26.23	-9999	-26.47	-0.2388	44.2973	3.35752	-9999
2000	326	5100	5700	5400	1.29994	6.57	-26.11	-9999	-26.4	-0.2872	51.1371	1.57245	-9999
2000	326	5700	6300	6000	1.39978	6.77	-26.11	-9999	-26.41	-0.2978	52.3927	2.03516	-9999
2000	326	6300	6900	6600	0.999787	6.57	-26.16	-9999	-26.44	-0.279	53.6907	2.07619	-9999
2000	326	6900	7500	7200	0.800023	7.22	-26.54	-9999	-26.91	-0.3693	57.2986	1.56833	-9999
2000	326	7500	8100	7800	359.3	7.62	-26.6	-9999	-26.95	-0.3483	58.4464	2.05008	-9999
2000	326	8100	8700	8400	6.89999	7.14	-26.65	-9999	-26.95	-0.2989	62.8914	2.80799	-9999
2000	326	8700	9300	9000	14.6002	6.69	-26.61	-9999	-26.89	-0.2777	65.483	2.31095	-9999
2000	326	9300	9900	9600	17	6.53	-26.72	-9999	-26.86	-0.13876	65.4934	1.91718	-9999
2000	326	9900	10500	10200	18.3	6.56	-26.98	-9999	-27.12	-0.1396	68.8436	1.826	-9999
2000	326	10500	11100	10800	14.4999	7.19	-27.21	-9999	-27.42	-0.2087	70.7485	1.85862	-9999
2000	326	11100	11700	11400	10.4004	7.92	-27.3	-9999	-27.48	-0.17919	74.2265	3.26854	-9999
2000	326	11700	12300	12000	9.19991	8.2	-27.26	-9999	-27.58	-0.3199	73.6566	2.37969	-9999
2000	326	12300	12900	12600	11.3001	8.5	-27.4	-9999	-27.7	-0.3	71.0229	1.70415	-9999
2000	326	12900	13500	13200	9	8.6	-27.44	-9999	-27.83	-0.3897	69.1601	1.5052	-9999
2000	326	13500	14100	13800	7.19997	8.64	-27.43	-9999	-27.91	-0.4797	70.479	1.96273	-9999
2000	326	14100	14700	14400	7.29999	9.08	-27.4	-9999	-27.8	-0.4	66.1473	1.86244	-9999
2000	326	14700	15300	15000	9.89977	9.17	-27.44	-9999	-27.81	-0.3699	66.3751	2.29914	-9999
2000	326	15300	15900	15600	13.3	9.21	-27.44	-9999	-27.66	-0.2199	71.2551	2.10954	-9999
2000	326	15900	16500	16200	14.3	8.85	-27.3	-9999	-27.65	-0.3499	75.2789	2.15734	-9999
2000	326	16500	17100	16800	16	8.6	-27.6	-9999	-27.9	-0.297	70.737	2.0552	-9999
2000	326	17100	17700	17400	-9999	-9999	-9999	-9999	-9999	-9999	71.6615	2.99855	-9999
2000	326	17700	18300	18000	-9999	-9999	-9999	-9999	-9999	-9999	76.9281	2.01414	-9999
2000	326	18300	18900	18600	-9999	-9999	-9999	-9999	-9999	-9999	78.1509	2.25359	-9999
2000	326	18900	19500	19200	-9999	-9999	-9999	-9999	-9999	-9999	83.1326	1.7016	-9999
2000	326	19500	20100	19800	-9999	-9999	-9999	-9999	-9999	-9999	-9999	-9999	-9999
2000	326	20100	20700	20400	-9999	-9999	-9999	-9999	-9999	-9999	-9999	-9999	-9999
2000	326	20700	21300	21000	-9999	-9999	-9999	-9999	-9999	-9999	-9999	-9999	-9999
2000	326	21300	21900	21600	-9999	-9999	-9999	-9999	-9999	-9999	-9999	-9999	-9999
2000	326	21900	22500	22200	-9999	-9999	-9999	-9999	-9999	-9999	76.3686	1.86565	-9999
2000	326	22500	23100	22800	-9999	-9999	-9999	-9999	-9999	-9999	76.9875	2.52458	-9999
2000	326	23100	23700	23400	-9999	-9999	-9999	-9999	-9999	-9999	74.0377	2.15271	-9999
2000	326	23700	24300	24000	-9999	-9999	-9999	-9999	-9999	-9999	73.9202	2.69101	-9999
2000	326	24300	24900	24600	-9999	-9999	-9999	-9999	-9999	-9999	72.0609	2.04457	-9999
2000	326	24900	25500	25200	-9999	-9999	-9999	-9999	-9999	-9999	70.178	1.98979	-9999
2000	326	25500	26100	25800	-9999	-9999	-9999	-9999	-9999	-9999	71.2566	1.47033	-9999
2000	326	26100	26700	26400	-9999	-9999	-9999	-9999	-9999	-9999	68.0501	1.55968	-9999
2000	326	26700	27300	27000	-9999	-9999	-9999	-9999	-9999	-9999	66.7817	1.77407	-9999
2000	326	27300	27900	27600	-9999	-9999	-9999	-9999	-9999	-9999	69.6467	2.10405	-9999
2000	326	27900	28500	28200	-9999	-9999	-9999	-9999	-9999	-9999	57.3481	8.10822	-9999
2000	326	28500	29100	28800	-9999	-9999	-9999	-9999	-9999	-9999	55.0488	2.68824	-9999
2000	326	29100	29700	29400	-9999	-9999	-9999	-9999	-9999	-9999	58.1087	3.62866	-9999
2000	326	29700	30300	30000	-9999	-9999	-9999	-9999	-9999	-9999	53.835	3.78234	-9999
2000	326	30300	30900	30600	-9999	-9999	-9999	-9999	-9999	-9999	54.0244	1.47898	-9999
2000	326	30900	31500	31200	-9999	-9999	-9999	-9999	-9999	-9999	-9999	-9999	-9999
2000	326	31500	32100	31800	-9999	-9999	-9999	-9999	-9999	-9999	-9999	-9999	-9999
2000	326	32100	32700	32400	-9999	-9999	-9999	-9999	-9999	-9999	55.5391	1.55187	-9999
2000	326	32700	33300	33000	-9999	-9999	-9999	-9999	-9999	-9999	56.1387	1.78975	-9999
2000	326	33300	33900	33600	-9999	-9999	-9999	-9999	-9999	-9999	60.5251	4.8868	-9999
2000	326	33900	34500	34200	-9999	-9999	-9999	-9999	-9999	-9999	64.1829	2.43905	-9999
2000	326	34500	35100	34800	-9999	-9999	-9999	-9999	-9999	-9999	63.5644	2.00417	-9999
2000	326	35100	35700	35400	-9999	-9999	-9999	-9999	-9999	-9999	60.5901	1.80698	-9999
2000	326	35700	36300	36000	-9999	-9999	-9999	-9999	-9999	-9999	58.9171	1.54542	-9999
2000	326	36300	36900	36600	-9999	-9999	-9999	-9999	-9999	-9999	58.2615	1.49081	-9999
2000	326	36900	37500	37200	-9999	-9999	-9999	-9999	-9999	-9999	58.6584	2.2328	-9999
2000	326	37500	38100	37800	-9999	-9999	-9999	-9999	-9999	-9999	58.0511	1.9486	-9999
2000	326	38100	38700	38400	-9999	-9999	-9999	-9999	-9999	-9999	61.2149	2.11662	-9999
2000	326	38700	39300	39000	-9999	-9999	-9999	-9999	-9999	-9999	59.6445	1.35018	-9999
2000	326	39300	39900	39600	-9999	-9999	-9999	-9999	-9999	-9999	56.8928	1.52052	-9999
2000	326	39900	40500	40200	-9999	-9999	-9999	-9999	-9999	-9999	55.7129	2.55156	-9999
2000	326	40500	41100	40800	-9999	-9999	-9999	-9999	-9999	-9999	60.8482	3.30951	-9999
2000	326	41100	41700	41400	-9999	-9999	-9999	-9999	-9999	-9999	61.1923	2.44302	-9999
2000	326	41700	42300	42000	-9999	-9999	-9999	-9999	-9999	-9999	63.9985	1.85585	-9999
2000	326	42300	42900	42600	-9999	-9999	-9999	-9999	-9999	-9999	63.2769	1.45222	-9999
2000	326	42900	43500	43200	-9999	-9999	-9999	-9999	-9999	-9999	62.1375	1.72088	-9999
2000	326	43500	44100	43800	-9999	-9999	-9999	-9999	-9999	-9999	62.0399	1.99219	-9999
2000	326	44100	44700	44400	-9999	-9999	-9999	-9999	-9999	-9999	60.2502	2.51323	-9999
2000	326	44700	45300	45000	-9999	-9999	-9999	-9999	-9999	-9999	63.2297	1.72866	-9999
2000	326	45300	45900	45600	-9999	-9999	-9999	-9999	-9999	-9999	63.7719	1.20609	-9999
2000	326	45900	46500	46200	-9999	-9999	-9999	-9999	-9999	-9999	67.6068	2.69233	-9999
2000	326	46500	47100	46800	-9999	-9999	-9999	-9999	-9999	-9999	72.4758	1.67733	-9999
2000	326	47100	47700	47400	-9999	-9999	-9999	-9999	-9999	-9999	68.5512	2.50728	-9999
2000	326	47700	48300	48000	-9999	-9999	-9999	-9999	-9999	-9999	67.1464	2.74407	-9999
2000	326	48300	48900	48600	-9999	-9999	-9999	-9999	-9999	-9999	68.3662	1.80534	-9999
2000	326	48900	49500	49200	-9999	-9999	-9999	-9999	-9999	-9999	69.9878	2.02998	-9999
2000	326	49500	50100	49800	-9999	-9999	-9999	-9999	-9999	-9999	71.8816	1.59081	-9999
2000	326	50100	50700	50400	-9999	-9999	-9999	-9999	-9999	-9999	75.3868	2.21975	-9999
2000	326	50700	51300	51000	-9999	-9999	-9999	-9999	-9999	-9999	76.9056	1.43596	-9999
2000	326	51300	51900	51600	-9999	-9999	-9999	-9999	-9999	-9999	78.8133	1.65043	-9999
2000	326	51900	52500	52200	-9999	-9999	-9999	-9999	-9999	-9999	77.6011	1.24089	-9999
2000	326	52500	53100	52800	-9999	-9999	-9999	-9999	-9999	-9999	80.3678	1.98114	-9999
2000	326	53100	53700	53400	-9999	-9999	-9999	-9999	-9999	-9999	81.4032	1.59153	-9999
2000	326	53700	54300	54000	-9999	-9999	-9999	-9999	-9999	-9999	83.9831	1.5387	-9999
2000	326	54300	54900	54600	-9999	-9999	-9999	-9999	-9999	-9999	85.2727	1.90928	-9999
2000	326	54900	55500	55200	-9999	-9999	-9999	-9999	-9999	-9999	85.4308	1.88962	-9999
2000	326	55500	56100	55800	-9999	-9999	-9999	-9999	-9999	-9999	84.3851	1.70711	-9999
2000	326	56100	56700	56400	-9999	-9999	-9999	-9999	-9999	-9999	83.0048	1.64464	-9999
2000	326	56700	57300	57000	-9999	-9999	-9999	-9999	-9999	-9999	82.2137	1.23756	-9999
2000	326	57300	57900	57600	-9999	-9999	-9999	-9999	-9999	-9999	81.0472	1.47397	-9999
2000	326	57900	58500	58200	-9999	-9999	-9999	-9999	-9999	-9999	79.4129	1.34229	-9999
2000	326	58500	59100	58800	-9999	-9999	-9999	-9999	-9999	-9999	80.5009	1.50236	-9999
2000	326	59100	59700	59400	-9999	-9999	-9999	-9999	-9999	-9999	81.2132	1.8198	-9999
2000	326	59700	60300	60000	-9999	-9999	-9999	-9999	-9999	-9999	83.9542	2.03634	-9999
2000	326	60300	60900	60600	-9999	-9999	-9999	-9999	-9999	-9999	85.6085	2.07828	-9999
2000	326	60900	61500	61200	-9999	-9999	-9999	-9999	-9999	-9999	82.4845	1.54149	-9999
2000	326	61500	62100	61800	-9999	-9999	-9999	-9999	-9999	-9999	80.1202	2.93285	-9999
2000	326	62100	62700	62400	-9999	-9999	-9999	-9999	-9999	-9999	73.9093	1.92285	-9999
2000	326	62700	63300	63000	-9999	-9999	-9999	-9999	-9999	-9999	76.3021	2.04645	-9999
2000	326	63300	63900	63600	-9999	-9999	-9999	-9999	-9999	-9999	79.4008	1.9959	-9999
2000	326	63900	64500	64200	-9999	-9999	-9999	-9999	-9999	-9999	79.4102	2.34596	-9999
2000	326	64500	65100	64800	-9999	-9999	-9999	-9999	-9999	-9999	78.2925	1.50968	-9999
2000	326	65100	65700	65400	-9999	-9999	-9999	-9999	-9999	-9999	79.5164	2.1078	-9999
2000	326	65700	66300	66000	-9999	-9999	-9999	-9999	-9999	-9999	80.0525	1.86591	-9999
2000	326	66300	66900	66600	-9999	-9999	-9999	-9999	-9999	-9999	80.514	2.15434	-9999
2000	326	66900	67500	67200	-9999	-9999	-9999	-9999	-9999	-9999	80.8969	1.70912	-9999
2000	326	67500	68100	67800	-9999	-9999	-9999	-9999	-9999	-9999	84.2305	2.04868	-9999
2000	326	68100	68700	68400	-9999	-9999	-9999	-9999	-9999	-9999	85.4248	1.57969	-9999
2000	326	68700	69300	69000	-9999	-9999	-9999	-9999	-9999	-9999	-9999	-9999	-9999
2000	326	69300	69900	69600	-9999	-9999	-9999	-9999	-9999	-9999	-9999	-9999	-9999
2000	326	69900	70500	70200	-9999	-9999	-9999	-9999	-9999	-9999	82.1469	2.14631	-9999
2000	326	70500	71100	70800	-9999	-9999	-9999	-9999	-9999	-9999	77.5028	3.0745	-9999
2000	326	71100	71700	71400	-9999	-9999	-9999	-9999	-9999	-9999	71.9324	1.40262	-9999
2000	326	71700	72300	72000	-9999	-9999	-9999	-9999	-9999	-9999	70.7167	1.84247	-9999
2000	326	72300	72900	72600	-9999	-9999	-9999	-9999	-9999	-9999	70.7252	1.28156	-9999
2000	326	72900	73500	73200	-9999	-9999	-9999	-9999	-9999	-9999	68.3315	1.87999	-9999
2000	326	73500	74100	73800	-9999	-9999	-9999	-9999	-9999	-9999	72.1322	1.73107	-9999
2000	326	74100	74700	74400	-9999	-9999	-9999	-9999	-9999	-9999	69.6687	1.42936	-9999
2000	326	74700	75300	75000	-9999	-9999	-9999	-9999	-9999	-9999	69.1089	1.45081	-9999
2000	326	75300	75900	75600	-9999	-9999	-9999	-9999	-9999	-9999	-9999	-9999	-9999
2000	326	75900	76500	76200	-9999	-9999	-9999	-9999	-9999	-9999	-9999	-9999	-9999
2000	326	76500	77100	76800	-9999	-9999	-9999	-9999	-9999	-9999	74.2534	2.10575	-9999
2000	326	77100	77700	77400	-9999	-9999	-9999	-9999	-9999	-9999	73.8608	1.69811	-9999
2000	326	77700	78300	78000	-9999	-9999	-9999	-9999	-9999	-9999	70.8994	1.75361	-9999
2000	326	78300	78900	78600	-9999	-9999	-9999	-9999	-9999	-9999	68.0316	3.52785	-9999
2000	326	78900	79500	79200	0.5	6.25	-26.7333	-9999	-27	-0.266333	63.2196	2.04539	-9999
2000	326	79500	80100	79800	359.3	6.88	-26.62	-9999	-26.91	-0.2875	61.7853	1.57125	-9999
2000	326	80100	80700	80400	357.7	6.05	-26.71	-9999	-26.96	-0.2489	60.1733	1.75213	-9999
2000	326	80700	81300	81000	4.40002	5.99	-26.79	-9999	-26.94	-0.14918	63.8598	3.99525	-9999
2000	326	81300	81900	81600	2.80087	5.85	-26.52	-9999	-26.69	-0.16949	67.841	2.07656	-9999
2000	326	81900	82500	82200	357.3	6.74	-26.36	-9999	-26.57	-0.2096	64.2318	2.46975	-9999
2000	326	82500	83100	82800	359.401	6.55	-26.43	-9999	-26.76	-0.33	74.1	43.1711	-9999
2000	326	83100	83700	83400	2.19988	6.83	-26.5	-9999	-26.77	-0.2697	61.891	2.0328	-9999
2000	326	83700	84300	84000	357.696	7.6	-26.4	-9999	-26.68	-0.2799	57.2866	3.43119	-9999
2000	326	84300	84900	84600	353.501	7.97	-26.38	-9999	-26.62	-0.2399	53.4467	1.85737	-9999
2000	326	84900	85500	85200	349.1	7.42	-26.39	-9999	-26.67	-0.28	400.321	828.251	-9999
2000	326	85500	86100	85800	341.7	7.08	-26.56	-9999	-26.85	-0.2884	137.661	500.417	-9999
2000	326	86100	86700	86400	342.899	6.36	-26.6	-9999	-26.88	-0.2774	56.4737	-9999	-9999
2000	327	300	900	600	340.699	6.95	-26.61	-9999	-26.8	-0.1891	-9999	-9999	-9999
2000	327	900	1500	1200	342.099	6.94	-26.6	-9999	-26.82	-0.2186	-9999	-9999	-9999
2000	327	1500	2100	1800	337.4	5.88	-26.63	-9999	-26.85	-0.2192	-9999	-9999	-9999
2000	327	2100	2700	2400	335.4	5.97	-26.69	-9999	-26.95	-0.2593	-9999	-9999	-9999
2000	327	2700	3300	3000	333.1	6.2	-26.6	-9999	-26.81	-0.2088	-9999	-9999	-9999
2000	327	3300	3900	3600	334	6.96	-26.59	-9999	-26.73	-0.13834	-9999	-9999	-9999
2000	327	3900	4500	4200	339.1	6.71	-26.53	-9999	-26.7	-0.16867	-9999	-9999	-9999
2000	327	4500	5100	4800	341.7	6.94	-26.56	-9999	-26.78	-0.2189	-9999	-9999	-9999
2000	327	5100	5700	5400	347.8	7.03	-26.9	-9999	-26.99	-0.08949	-9999	-9999	-9999
2000	327	5700	6300	6000	348.299	6.39	-27.01	-9999	-27.03	-0.02043	-9999	-9999	-9999
2000	327	6300	6900	6600	336.458	4.8	-27.32	-9999	-27.25	0.06927	-9999	-9999	-9999
2000	327	6900	7500	7200	319.901	3.2	-27.52	-9999	-27.24	0.27959	-9999	-9999	-9999
2000	327	7500	8100	7800	330.399	4.56	-27.59	-9999	-27.36	0.2298	-9999	-9999	-9999
2000	327	8100	8700	8400	320.598	5.44	-27.8	-9999	-27.4	0.3996	-9999	-9999	-9999
2000	327	8700	9300	9000	313.501	5.79	-28.18	-9999	-27.51	0.669	-9999	-9999	-9999
2000	327	9300	9900	9600	323.802	5.25	-28.41	-9999	-27.57	0.839	-9999	-9999	-9999
2000	327	9900	10500	10200	327.4	4.62	-28.47	-9999	-27.76	0.7093	-9999	-9999	-9999
2000	327	10500	11100	10800	327.5	3.86	-28.73	-9999	-28.11	0.6197	-9999	-9999	-9999
2000	327	11100	11700	11400	324.4	4	-28.95	-9999	-28.26	0.6897	-9999	-9999	-9999
2000	327	11700	12300	12000	323.9	3.77	-29.23	-9999	-28.23	0.9999	-9999	-9999	-9999
2000	327	12300	12900	12600	336.704	3.63	-29.37	-9999	-28.15	1.22	-9999	-9999	-9999
2000	327	12900	13500	13200	342.5	3.3	-29.28	-9999	-28	1.28	-9999	-9999	-9999
2000	327	13500	14100	13800	344.9	3.51	-29.39	-9999	-27.97	1.42	-9999	-9999	-9999
2000	327	14100	14700	14400	351.501	3.26	-29.24	-9999	-28	1.24	-9999	-9999	-9999
2000	327	14700	15300	15000	357.2	3.23	-29.3	-9999	-28.04	1.26	-9999	-9999	-9999
2000	327	15300	15900	15600	4.2001	2.91	-29.56	-9999	-28.06	1.5	-9999	-9999	-9999
2000	327	15900	16500	16200	2.90001	3.14	-29.34	-9999	-28.06	1.28	-9999	-9999	-9999
2000	327	16500	17100	16800	355.7	3.78	-29.43	-9999	-28.07	1.36	-9999	-9999	-9999
2000	327	17100	17700	17400	352.5	3.87	-29.57	-9999	-28.1	1.47	-9999	-9999	-9999
2000	327	17700	18300	18000	352.8	3.47	-29.93	-9999	-28.25	1.68	-9999	-9999	-9999
2000	327	18300	18900	18600	356.199	3.56	-29.96	-9999	-28.18	1.78	-9999	-9999	-9999
2000	327	18900	19500	19200	5.40041	3.86	-29.87	-9999	-28.07	1.8	184.889	31.6481	-9999
2000	327	19500	20100	19800	0.500061	4.21	-29.66	-9999	-28.03	1.63	144.771	13.2819	-9999
2000	327	20100	20700	20400	4.39999	4.74	-29.63	-9999	-28.01	1.62	132.718	11.78	-9999
2000	327	20700	21300	21000	12.5005	4.14	-29.65	-9999	-28.17	1.48	138.505	3.90983	-9999
2000	327	21300	21900	21600	15.8998	3.94	-30.04	-9999	-28.46	1.58	129.123	3.46426	-9999
2000	327	21900	22500	22200	25.0999	3.95	-30.25	-9999	-28.63	1.62	130.745	4.42442	-9999
2000	327	22500	23100	22800	30.6	3.87	-29.52	-9999	-28.59	0.9293	136.482	4.46479	-9999
2000	327	23100	23700	23400	35.6989	3.68	-29.76	-9999	-28.83	0.9299	133.488	3.3239	-9999
2000	327	23700	24300	24000	44.2011	3.34	-30.12	-9999	-29.28	0.8398	139.666	3.31912	-9999
2000	327	24300	24900	24600	33.9	3.73	-30.15	-9999	-29.06	1.09	137.282	3.55664	-9999
2000	327	24900	25500	25200	36.2001	3.89	-30.09	-9999	-28.87	1.22	137.155	20.2536	-9999
2000	327	25500	26100	25800	33.1997	4.1	-29.92	-9999	-28.84	1.08	150.421	51.6186	-9999
2000	327	26100	26700	26400	31.2	4.36	-29.78	-9999	-28.73	1.0498	132.366	3.3863	-9999
2000	327	26700	27300	27000	37.3012	4.17	-29.75	-9999	-28.72	1.0299	130.597	3.59182	-9999
2000	327	27300	27900	27600	40.4	3.71	-29.98	-9999	-28.81	1.17	139.552	4.71278	-9999
2000	327	27900	28500	28200	49.3874	3.21	-30.27	-9999	-29.02	1.25	144.085	5.73666	-9999
2000	327	28500	29100	28800	40.8794	3.68	-30.37	-9999	-28.96	1.41	146.146	4.04599	-9999
2000	327	29100	29700	29400	50.8208	3.36	-30.53	-9999	-29.24	1.29	158.877	22.2003	-9999
2000	327	29700	30300	30000	46.9499	3.62	-30.94	-9999	-29.47	1.47	156.393	7.87735	-9999
2000	327	30300	30900	30600	33.1999	4.39	-30.19	-9999	-28.98	1.2099	142.073	6.5793	-9999
2000	327	30900	31500	31200	38.6	3.93	-30.02	-9999	-29.16	0.8596	138.432	2.38346	-9999
2000	327	31500	32100	31800	33.2005	4.19	-30.04	-9999	-29.15	0.8898	136.873	2.9235	-9999
2000	327	32100	32700	32400	28.5	4.64	-29.91	-9999	-28.89	1.0199	134.185	2.02722	-9999
2000	327	32700	33300	33000	23.5995	4.98	-29.86	-9999	-28.87	0.99	131.605	2.23033	-9999
2000	327	33300	33900	33600	19.8	5.63	-29.75	-9999	-28.73	1.02	128.272	2.79049	-9999
2000	327	33900	34500	34200	19.6	5.79	-29.7	-9999	-28.57	1.13	126.582	2.53965	-9999
2000	327	34500	35100	34800	19.3	5.7	-29.7	-9999	-28.53	1.17	126.62	3.12191	-9999
2000	327	35100	35700	35400	18.6	6.03	-29.68	-9999	-28.43	1.25	126.572	2.05134	-9999
2000	327	35700	36300	36000	18.5	5.94	-29.66	-9999	-28.45	1.21	126.901	2.41486	-9999
2000	327	36300	36900	36600	18.3	5.89	-29.74	-9999	-28.45	1.29	129.027	2.68836	-9999
2000	327	36900	37500	37200	16.5	6.19	-29.71	-9999	-28.17	1.54	127.908	2.29989	-9999
2000	327	37500	38100	37800	17.2	6.19	-29.66	-9999	-28.06	1.6	126.731	2.62678	-9999
2000	327	38100	38700	38400	18.2	6.21	-29.6	-9999	-28.32	1.28	124.029	2.94376	-9999
2000	327	38700	39300	39000	18.7	6.1	-29.52	-9999	-28.39	1.13	122.235	1.93904	-9999
2000	327	39300	39900	39600	21	6.19	-29.6	-9999	-28.41	1.19	125.278	1.94736	-9999
2000	327	39900	40500	40200	21.1	6.21	-29.71	-9999	-28.63	1.0799	124.933	3.88677	-9999
2000	327	40500	41100	40800	23.1	6.11	-29.83	-9999	-28.89	0.9399	126.692	2.20117	-9999
2000	327	41100	41700	41400	23.9	5.75	-29.89	-9999	-29	0.8893	127.618	3.17047	-9999
2000	327	41700	42300	42000	24.8	5.66	-30	-9999	-29.02	0.9798	127.304	1.59177	-9999
2000	327	42300	42900	42600	26.8	5.61	-30.08	-9999	-29.16	0.9198	126.392	2.29213	-9999
2000	327	42900	43500	43200	27.4	5.36	-30.19	-9999	-29.35	0.8397	126.925	2.06345	-9999
2000	327	43500	44100	43800	30.4002	4.79	-30.22	-9999	-29.39	0.8299	125.161	2.47276	-9999
2000	327	44100	44700	44400	32.4	4.86	-30.21	-9999	-29.25	0.9596	122.984	1.87337	-9999
2000	327	44700	45300	45000	35.1	4.66	-30.26	-9999	-29.3	0.9596	122.504	2.21188	-9999
2000	327	45300	45900	45600	32.7	5.07	-30.23	-9999	-29.31	0.9197	120.733	2.56515	-9999
2000	327	45900	46500	46200	34.6	4.31	-30.31	-9999	-29.4	0.91	121.581	2.53759	-9999
2000	327	46500	47100	46800	32.5	4.46	-30.25	-9999	-29.37	0.8797	120.59	2.02857	-9999
2000	327	47100	47700	47400	36.3	4.82	-30.3	-9999	-29.34	0.9598	121.508	2.69944	-9999
2000	327	47700	48300	48000	35.7	4.42	-30.41	-9999	-29.51	0.8991	124.678	2.55659	-9999
2000	327	48300	48900	48600	37.4999	4.04	-30.56	-9999	-29.61	0.9498	127.964	2.5139	-9999
2000	327	48900	49500	49200	43.6	3.85	-30.75	-9999	-29.64	1.11	132.121	1.92483	-9999
2000	327	49500	50100	49800	38.9	4.69	-30.61	-9999	-29.62	0.99	131.042	1.8344	-9999
2000	327	50100	50700	50400	42.098	4.51	-30.65	-9999	-29.69	0.9599	135.237	3.01137	-9999
2000	327	50700	51300	51000	65.305	2.81	-31.96	-9999	-30.42	1.54	175.244	14.1183	-9999
2000	327	51300	51900	51600	60.2957	3.05	-32.63	-9999	-30.64	1.99	189.582	5.28756	-9999
2000	327	51900	52500	52200	56.5	3.52	-32.26	-9999	-30.43	1.83	183.934	4.95115	-9999
2000	327	52500	53100	52800	57.1	3.48	-32.2	-9999	-30.45	1.75	182.7	2.58577	-9999
2000	327	53100	53700	53400	54.8	3.98	-32.04	-9999	-30.15	1.89	172.484	4.22508	-9999
2000	327	53700	54300	54000	56.6	3.66	-32.13	-9999	-30.43	1.7	170.892	2.45369	-9999
2000	327	54300	54900	54600	51.9997	4.07	-32.11	-9999	-30.29	1.82	170.268	3.01942	-9999
2000	327	54900	55500	55200	52.6999	4.08	-32	-9999	-30.35	1.65	169.193	2.07573	-9999
2000	327	55500	56100	55800	56.3001	4.27	-31.93	-9999	-30.43	1.5	-9999	-9999	-9999
2000	327	56100	56700	56400	50.2001	4.59	-31.89	-9999	-30.46	1.43	-9999	-9999	-9999
2000	327	56700	57300	57000	42.2998	5.23	-31.66	-9999	-30.16	1.5	-9999	-9999	-9999
2000	327	57300	57900	57600	38.7	5.34	-31.39	-9999	-30.15	1.24	-9999	-9999	-9999
2000	327	57900	58500	58200	38.3	5.35	-31.11	-9999	-30.21	0.9	-9999	-9999	-9999
2000	327	58500	59100	58800	40.7999	5.06	-31.09	-9999	-30.41	0.68	-9999	-9999	-9999
2000	327	59100	59700	59400	45.8994	4.59	-31.13	-9999	-30.46	0.6696	-9999	-9999	-9999
2000	327	59700	60300	60000	54.6002	3.92	-31.51	-9999	-30.59	0.9192	-9999	-9999	-9999
2000	327	60300	60900	60600	51.2	3.9	-31.53	-9999	-30.52	1.0098	161.706	2.26819	-9999
2000	327	60900	61500	61200	44.7996	4.47	-31.61	-9999	-30.57	1.04	161.889	3.51057	-9999
2000	327	61500	62100	61800	48.5002	3.9	-31.71	-9999	-30.55	1.16	161.488	2.43878	-9999
2000	327	62100	62700	62400	44.2	4.06	-31.68	-9999	-30.48	1.2	157.543	2.88364	-9999
2000	327	62700	63300	63000	47	3.92	-31.62	-9999	-30.48	1.14	153.641	2.53016	-9999
2000	327	63300	63900	63600	53.4018	3.47	-31.76	-9999	-30.61	1.15	154.393	3.23349	-9999
2000	327	63900	64500	64200	48.1987	4.05	-32.01	-9999	-30.6	1.41	154.245	3.59318	-9999
2000	327	64500	65100	64800	46.8	4.01	-31.96	-9999	-30.69	1.27	156.777	2.71373	-9999
2000	327	65100	65700	65400	51.0001	3.84	-32.13	-9999	-30.76	1.37	159.666	2.8612	-9999
2000	327	65700	66300	66000	47.7998	4.04	-32.05	-9999	-30.79	1.26	155.446	2.40836	-9999
2000	327	66300	66900	66600	51.0002	3.77	-32.04	-9999	-30.87	1.17	150.278	1.99456	-9999
2000	327	66900	67500	67200	44.4998	4.58	-32.03	-9999	-30.64	1.39	150.053	3.51022	-9999
2000	327	67500	68100	67800	43.9003	4.55	-31.98	-9999	-30.59	1.39	152.591	2.4413	-9999
2000	327	68100	68700	68400	41.4999	4.89	-31.69	-9999	-30.41	1.28	142.997	2.86334	-9999
2000	327	68700	69300	69000	45.6	4.08	-31.73	-9999	-30.72	1.0098	143.129	2.03355	-9999
2000	327	69300	69900	69600	52.5001	4.21	-31.76	-9999	-30.71	1.0498	142.893	2.04517	-9999
2000	327	69900	70500	70200	52.6996	4.18	-31.85	-9999	-30.66	1.19	-9999	-9999	-9999
2000	327	70500	71100	70800	58.8	3.86	-32	-9999	-30.7	1.3	-9999	-9999	-9999
2000	327	71100	71700	71400	71.1035	3.41	-32.14	-9999	-31.09	1.05	141.31	1.83054	-9999
2000	327	71700	72300	72000	62.7993	3.54	-32.26	-9999	-31.16	1.1	139.605	2.67994	-9999
2000	327	72300	72900	72600	52.0002	3.97	-32.18	-9999	-31.01	1.17	140.506	2.32819	-9999
2000	327	72900	73500	73200	53.7003	3.85	-32	-9999	-30.82	1.18	142.575	1.80735	-9999
2000	327	73500	74100	73800	52.2	3.85	-32	-9999	-30.87	1.1299	-9999	-9999	-9999
2000	327	74100	74700	74400	60.7003	3.28	-32.06	-9999	-31.09	0.9698	-9999	-9999	-9999
2000	327	74700	75300	75000	59.5008	3.58	-32.17	-9999	-31.12	1.05	141.262	2.85637	-9999
2000	327	75300	75900	75600	49.6	4.32	-31.91	-9999	-30.79	1.12	137.235	1.48234	-9999
2000	327	75900	76500	76200	46.2999	4.63	-31.83	-9999	-30.66	1.17	-9999	-9999	-9999
2000	327	76500	77100	76800	47.0001	4.65	-31.53	-9999	-30.6	0.9296	-9999	-9999	-9999
2000	327	77100	77700	77400	48.6999	4.72	-31.52	-9999	-30.76	0.7595	-9999	-9999	-9999
2000	327	77700	78300	78000	54.5	4.07	-31.61	-9999	-30.84	0.77	-9999	-9999	-9999
2000	327	78300	78900	78600	57.9002	3.93	-31.74	-9999	-30.96	0.7798	137.693	7.79661	-9999
2000	327	78900	79500	79200	55.601	4.1	-31.81	-9999	-31.04	0.7697	141.19	7.52086	-9999
2000	327	79500	80100	79800	50.3	4.53	-31.75	-9999	-31.11	0.6395	143.992	6.90863	-9999
2000	327	80100	80700	80400	46.3002	4.86	-31.66	-9999	-31.07	0.5895	142.535	7.43663	-9999
2000	327	80700	81300	81000	41.0994	5.15	-31.58	-9999	-30.88	0.6997	143.262	7.01409	-9999
2000	327	81300	81900	81600	38.8007	5.54	-31.38	-9999	-30.51	0.869	133.421	7.06412	-9999
2000	327	81900	82500	82200	37.7015	5.13	-31.28	-9999	-30.44	0.8397	126.793	9.28576	-9999
2000	327	82500	83100	82800	41.1999	4.75	-31.32	-9999	-30.69	0.6292	129.949	6.86297	-9999
2000	327	83100	83700	83400	45.8	4.52	-31.52	-9999	-30.85	0.6694	134.024	7.22446	-9999
2000	327	83700	84300	84000	47.9	3.96	-31.66	-9999	-31.13	0.5297	137.091	6.8166	-9999
2000	327	84300	84900	84600	49.1	4.33	-31.79	-9999	-31.14	0.6494	139.386	6.88632	-9999
2000	327	84900	85500	85200	44.3	4.54	-31.79	-9999	-30.9	0.8898	134.053	6.89186	-9999
2000	327	85500	86100	85800	49.7004	4.13	-31.7	-9999	-30.86	0.8396	133.848	6.75065	-9999
2000	327	86100	86700	86400	50.2	4.16	-31.73	-9999	-30.89	0.84	136.587	6.80501	-9999
2000	328	300	900	600	47.2	4.31	-31.82	-9999	-30.82	1	132.525	7.03044	-9999
2000	328	900	1500	1200	49	4.16	-31.98	-9999	-31.03	0.9497	138.407	7.31921	-9999
2000	328	1500	2100	1800	50.0001	4.45	-32.04	-9999	-30.99	1.0499	142.145	6.83253	-9999
2000	328	2100	2700	2400	47.3	4.67	-31.91	-9999	-30.78	1.13	138.461	7.27647	-9999
2000	328	2700	3300	3000	45.7999	4.88	-31.72	-9999	-30.63	1.0899	136.618	7.03988	-9999
2000	328	3300	3900	3600	44.6	5.03	-31.62	-9999	-30.6	1.02	133.999	6.98603	-9999
2000	328	3900	4500	4200	44.5	4.82	-31.53	-9999	-30.62	0.9093	132.247	6.86734	-9999
2000	328	4500	5100	4800	48.2999	4.6	-31.46	-9999	-30.43	1.0298	130.707	7.72482	-9999
2000	328	5100	5700	5400	51.9002	4.41	-31.38	-9999	-30.49	0.8893	125.827	7.70484	-9999
2000	328	5700	6300	6000	56.4004	3.97	-31.6	-9999	-30.81	0.7893	133.941	7.85463	-9999
2000	328	6300	6900	6600	47.7997	4.51	-31.55	-9999	-30.62	0.9296	137.486	7.85844	-9999
2000	328	6900	7500	7200	60.2004	4.05	-32.07	-9999	-30.82	1.25	151.453	7.53012	-9999
2000	328	7500	8100	7800	69.3009	3.46	-32.16	-9999	-31.14	1.02	152.999	7.36847	-9999
2000	328	8100	8700	8400	65.8902	3.63	-32.24	-9999	-31.11	1.1293	152.173	8.29061	-9999
2000	328	8700	9300	9000	57.3	4.24	-32.07	-9999	-30.78	1.29	151.278	8.72401	-9999
2000	328	9300	9900	9600	55.8	4.27	-32.13	-9999	-30.74	1.39	154.731	7.15345	-9999
2000	328	9900	10500	10200	57.2998	4.06	-32.05	-9999	-30.92	1.1297	-9999	-9999	-9999
2000	328	10500	11100	10800	64.9023	3.67	-32.06	-9999	-31.21	0.8498	-9999	-9999	-9999
2000	328	11100	11700	11400	61.5001	3.7	-32.06	-9999	-31	1.06	-9999	-9999	-9999
2000	328	11700	12300	12000	55	4.04	-31.83	-9999	-30.79	1.04	-9999	-9999	-9999
2000	328	12300	12900	12600	57.3	4.02	-31.76	-9999	-30.74	1.0199	-9999	-9999	-9999
2000	328	12900	13500	13200	57.1004	4.2	-31.69	-9999	-30.7	0.9899	-9999	-9999	-9999
2000	328	13500	14100	13800	51.4	4.57	-31.6	-9999	-30.45	1.15	-9999	-9999	-9999
2000	328	14100	14700	14400	55.6002	4.36	-31.54	-9999	-30.36	1.18	-9999	-9999	-9999
2000	328	14700	15300	15000	62.2002	3.83	-31.69	-9999	-30.69	0.9997	-9999	-9999	-9999
2000	328	15300	15900	15600	65.7997	3.72	-31.74	-9999	-30.64	1.1	-9999	-9999	-9999
2000	328	15900	16500	16200	72.4001	3.63	-31.8	-9999	-30.77	1.03	-9999	-9999	-9999
2000	328	16500	17100	16800	73.5	3.63	-31.85	-9999	-30.9	0.9498	-9999	-9999	-9999
2000	328	17100	17700	17400	66.4997	3.94	-31.89	-9999	-30.74	1.15	-9999	-9999	-9999
2000	328	17700	18300	18000	61.8	4.35	-31.8	-9999	-30.49	1.31	-9999	-9999	-9999
2000	328	18300	18900	18600	67.7003	3.89	-31.84	-9999	-30.63	1.21	-9999	-9999	-9999
2000	328	18900	19500	19200	66.501	3.58	-31.87	-9999	-30.67	1.2	-9999	-9999	-9999
2000	328	19500	20100	19800	60.3	3.87	-31.69	-9999	-30.45	1.24	-9999	-9999	-9999
2000	328	20100	20700	20400	62.8	3.88	-31.6	-9999	-30.4	1.2	-9999	-9999	-9999
2000	328	20700	21300	21000	69.7008	3.69	-31.69	-9999	-30.44	1.25	-9999	-9999	-9999
2000	328	21300	21900	21600	73.6997	3.43	-31.93	-9999	-30.74	1.19	-9999	-9999	-9999
2000	328	21900	22500	22200	85.4954	2.8	-32.27	-9999	-31.42	0.8488	-9999	-9999	-9999
2000	328	22500	23100	22800	85.9944	3.07	-32.37	-9999	-31.52	0.848	-9999	-9999	-9999
2000	328	23100	23700	23400	76.6	3.59	-32.33	-9999	-31.28	1.0482	-9999	-9999	-9999
2000	328	23700	24300	24000	75.6007	3.59	-32.25	-9999	-31.33	0.9186	-9999	-9999	-9999
2000	328	24300	24900	24600	70.9	3.45	-32.29	-9999	-31.27	1.0195	-9999	-9999	-9999
2000	328	24900	25500	25200	72.7001	3.24	-32.37	-9999	-31.43	0.939	-9999	-9999	-9999
2000	328	25500	26100	25800	73.7998	3.18	-32.2	-9999	-31.37	0.8288	-9999	-9999	-9999
2000	328	26100	26700	26400	71.2995	3.45	-32.1	-9999	-31.12	0.98	-9999	-9999	-9999
2000	328	26700	27300	27000	69.5003	3.57	-31.95	-9999	-30.95	0.9994	-9999	-9999	-9999
2000	328	27300	27900	27600	67.1	3.52	-31.91	-9999	-30.92	0.9899	-9999	-9999	-9999
2000	328	27900	28500	28200	62.4999	3.59	-31.89	-9999	-30.74	1.15	-9999	-9999	-9999
2000	328	28500	29100	28800	59.0009	3.81	-31.71	-9999	-30.65	1.0596	-9999	-9999	-9999
2000	328	29100	29700	29400	49.6999	4.65	-31.27	-9999	-30.57	0.6985	-9999	-9999	-9999
2000	328	29700	30300	30000	48.2	4.86	-31.06	-9999	-30.45	0.6099	-9999	-9999	-9999
2000	328	30300	30900	30600	52.0999	4.47	-31.09	-9999	-30.43	0.66	-9999	-9999	-9999
2000	328	30900	31500	31200	54.1	4.27	-31.01	-9999	-30.4	0.61	-9999	-9999	-9999
2000	328	31500	32100	31800	51.7999	4.49	-30.85	-9999	-30.28	0.5698	-9999	-9999	-9999
2000	328	32100	32700	32400	55.9001	4.24	-30.87	-9999	-30.33	0.5395	142.776	12.8396	-9999
2000	328	32700	33300	33000	47.3995	5.3	-30.8	-9999	-30.35	0.4499	147.617	114.874	-9999
2000	328	33300	33900	33600	43.5	6.04	-30.71	-9999	-30.04	0.669	162.557	14.1381	-9999
2000	328	33900	34500	34200	48.9001	5.4	-30.8	-9999	-30.12	0.6794	153.402	15.4648	-9999
2000	328	34500	35100	34800	52.7	4.76	-30.9	-9999	-30.21	0.6888	-9999	-9999	-9999
2000	328	35100	35700	35400	59.7991	4.33	-31.03	-9999	-30.14	0.8896	-9999	-9999	-9999
2000	328	35700	36300	36000	68.2003	3.94	-31.21	-9999	-30.27	0.9396	-9999	-9999	-9999
2000	328	36300	36900	36600	62.3999	4.4	-31.12	-9999	-30.12	1	-9999	-9999	-9999
2000	328	36900	37500	37200	71.3994	3.92	-31.18	-9999	-30.22	0.9598	-9999	-9999	-9999
2000	328	37500	38100	37800	79.5	3.96	-31.38	-9999	-30.37	1.01	-9999	-9999	-9999
2000	328	38100	38700	38400	73.8997	4.57	-31.34	-9999	-30.03	1.31	-9999	-9999	-9999
2000	328	38700	39300	39000	73	4.72	-31.25	-9999	-30.04	1.21	-9999	-9999	-9999
2000	328	39300	39900	39600	72.6	4.63	-31.24	-9999	-30.14	1.1	-9999	-9999	-9999
2000	328	39900	40500	40200	72.2	4.76	-31.24	-9999	-30.09	1.15	-9999	-9999	-9999
2000	328	40500	41100	40800	70.7	4.54	-31.25	-9999	-30.1	1.15	-9999	-9999	-9999
2000	328	41100	41700	41400	67.7	4.44	-31.32	-9999	-30.08	1.24	-9999	-9999	-9999
2000	328	41700	42300	42000	63.7997	4.07	-31.3	-9999	-30.35	0.95	-9999	-9999	-9999
2000	328	42300	42900	42600	60.9	4.4	-31.35	-9999	-30.31	1.04	-9999	-9999	-9999
2000	328	42900	43500	43200	57.3	4.73	-31.3	-9999	-30.11	1.19	-9999	-9999	-9999
2000	328	43500	44100	43800	59.3002	4.35	-31.37	-9999	-30.18	1.19	-9999	-9999	-9999
2000	328	44100	44700	44400	54.9	4.83	-31.2	-9999	-29.95	1.25	-9999	-9999	-9999
2000	328	44700	45300	45000	54	5.06	-31.01	-9999	-29.83	1.18	-9999	-9999	-9999
2000	328	45300	45900	45600	55	4.89	-31	-9999	-29.97	1.03	-9999	-9999	-9999
2000	328	45900	46500	46200	57.3	4.86	-31.1	-9999	-29.94	1.16	-9999	-9999	-9999
2000	328	46500	47100	46800	55.9	4.71	-31.11	-9999	-29.86	1.25	-9999	-9999	-9999
2000	328	47100	47700	47400	58	4.49	-31.12	-9999	-29.88	1.24	-9999	-9999	-9999
2000	328	47700	48300	48000	55.2	4.69	-30.99	-9999	-29.95	1.0399	-9999	-9999	-9999
2000	328	48300	48900	48600	53.1	5.13	-30.9	-9999	-29.83	1.07	-9999	-9999	-9999
2000	328	48900	49500	49200	52.8	5.31	-30.88	-9999	-29.7	1.18	-9999	-9999	-9999
2000	328	49500	50100	49800	51.6	5.26	-30.91	-9999	-29.67	1.24	-9999	-9999	-9999
2000	328	50100	50700	50400	52.2	5.02	-30.84	-9999	-29.75	1.09	-9999	-9999	-9999
2000	328	50700	51300	51000	54.7	4.81	-30.97	-9999	-29.8	1.17	-9999	-9999	-9999
2000	328	51300	51900	51600	59.5996	4.76	-31.02	-9999	-29.75	1.27	-9999	-9999	-9999
2000	328	51900	52500	52200	68.6002	4.29	-31.23	-9999	-29.96	1.27	-9999	-9999	-9999
2000	328	52500	53100	52800	61.5983	4.06	-31.38	-9999	-29.98	1.4	-9999	-9999	-9999
2000	328	53100	53700	53400	50.8	5.07	-30.75	-9999	-29.63	1.12	-9999	-9999	-9999
2000	328	53700	54300	54000	46.5	5.46	-30.54	-9999	-29.51	1.03	-9999	-9999	-9999
2000	328	54300	54900	54600	47	5.09	-30.48	-9999	-29.42	1.06	-9999	-9999	-9999
2000	328	54900	55500	55200	50.7	4.39	-30.49	-9999	-29.58	0.9095	-9999	-9999	-9999
2000	328	55500	56100	55800	52.6999	4.06	-30.61	-9999	-29.65	0.9597	-9999	-9999	-9999
2000	328	56100	56700	56400	61.5	3.61	-30.65	-9999	-29.67	0.9798	-9999	-9999	-9999
2000	328	56700	57300	57000	69.1	3.4	-30.86	-9999	-29.72	1.14	-9999	-9999	-9999
2000	328	57300	57900	57600	65.5013	3.55	-30.98	-9999	-29.8	1.18	-9999	-9999	-9999
2000	328	57900	58500	58200	52.7999	4.09	-30.99	-9999	-29.65	1.34	-9999	-9999	-9999
2000	328	58500	59100	58800	49.5	4.15	-30.64	-9999	-29.5	1.14	-9999	-9999	-9999
2000	328	59100	59700	59400	50.7998	4.21	-30.55	-9999	-29.42	1.13	-9999	-9999	-9999
2000	328	59700	60300	60000	55.5	4.01	-30.8	-9999	-29.49	1.31	-9999	-9999	-9999
2000	328	60300	60900	60600	58.9	4.04	-30.97	-9999	-29.74	1.23	-9999	-9999	-9999
2000	328	60900	61500	61200	61.9	4.07	-31.05	-9999	-29.83	1.22	-9999	-9999	-9999
2000	328	61500	62100	61800	59.3	4.53	-31.05	-9999	-29.67	1.38	-9999	-9999	-9999
2000	328	62100	62700	62400	55.2002	5	-30.9	-9999	-29.4	1.5	-9999	-9999	-9999
2000	328	62700	63300	63000	50.3	5.6	-30.75	-9999	-29.27	1.48	-9999	-9999	-9999
2000	328	63300	63900	63600	51.1	5.6	-30.77	-9999	-29.36	1.41	-9999	-9999	-9999
2000	328	63900	64500	64200	51.4	5.27	-30.71	-9999	-29.44	1.27	-9999	-9999	-9999
2000	328	64500	65100	64800	51.4	5.37	-30.71	-9999	-29.45	1.26	-9999	-9999	-9999
2000	328	65100	65700	65400	52.4	5.29	-30.73	-9999	-29.63	1.1	-9999	-9999	-9999
2000	328	65700	66300	66000	52.1	5.28	-30.82	-9999	-29.79	1.0299	-9999	-9999	-9999
2000	328	66300	66900	66600	53.3	5.25	-30.88	-9999	-29.86	1.02	-9999	-9999	-9999
2000	328	66900	67500	67200	54.2	5.04	-30.92	-9999	-29.88	1.04	-9999	-9999	-9999
2000	328	67500	68100	67800	52.7	5.09	-30.83	-9999	-29.74	1.09	-9999	-9999	-9999
2000	328	68100	68700	68400	56.3	4.67	-30.88	-9999	-29.87	1.0098	-9999	-9999	-9999
2000	328	68700	69300	69000	57.3	4.68	-30.92	-9999	-29.91	1.0097	-9999	-9999	-9999
2000	328	69300	69900	69600	53.8998	4.86	-30.85	-9999	-29.81	1.04	-9999	-9999	-9999
2000	328	69900	70500	70200	53	4.84	-30.8	-9999	-29.69	1.11	-9999	-9999	-9999
2000	328	70500	71100	70800	56.5	4.45	-30.89	-9999	-29.81	1.08	-9999	-9999	-9999
2000	328	71100	71700	71400	56.4	4.33	-30.95	-9999	-30.01	0.9394	-9999	-9999	-9999
2000	328	71700	72300	72000	54	4.74	-30.89	-9999	-29.97	0.9194	-9999	-9999	-9999
2000	328	72300	72900	72600	54.4	4.83	-30.97	-9999	-29.99	0.9797	-9999	-9999	-9999
2000	328	72900	73500	73200	53.6999	4.78	-31.05	-9999	-29.9	1.15	-9999	-9999	-9999
2000	328	73500	74100	73800	53.6999	4.95	-30.96	-9999	-29.83	1.13	-9999	-9999	-9999
2000	328	74100	74700	74400	54.8	4.66	-31.01	-9999	-30.05	0.9596	-9999	-9999	-9999
2000	328	74700	75300	75000	55.3001	4.7	-30.96	-9999	-30.09	0.8693	-9999	-9999	-9999
2000	328	75300	75900	75600	54.9999	4.27	-31	-9999	-30.14	0.8596	-9999	-9999	-9999
2000	328	75900	76500	76200	56.2	4.19	-31	-9999	-30.04	0.9598	-9999	-9999	-9999
2000	328	76500	77100	76800	54.8001	4.06	-31.03	-9999	-30.12	0.9097	-9999	-9999	-9999
2000	328	77100	77700	77400	55	4.19	-31	-9999	-30.04	0.9597	-9999	-9999	-9999
2000	328	77700	78300	78000	50.3	4.9	-30.86	-9999	-29.83	1.03	-9999	-9999	-9999
2000	328	78300	78900	78600	50.1	4.4	-30.98	-9999	-29.96	1.0199	-9999	-9999	-9999
2000	328	78900	79500	79200	46.8998	4.56	-30.78	-9999	-29.94	0.8394	-9999	-9999	-9999
2000	328	79500	80100	79800	45.5	4.62	-30.58	-9999	-30.01	0.57	-9999	-9999	-9999
2000	328	80100	80700	80400	42.7999	4.58	-30.48	-9999	-29.89	0.5896	-9999	-9999	-9999
2000	328	80700	81300	81000	43	5.05	-30.37	-9999	-29.62	0.7486	-9999	-9999	-9999
2000	328	81300	81900	81600	38.3	5.57	-30.21	-9999	-29.47	0.7392	-9999	-9999	-9999
2000	328	81900	82500	82200	35.9	6.25	-30.11	-9999	-29.19	0.9197	-9999	-9999	-9999
2000	328	82500	83100	82800	34.6	6.4	-30.14	-9999	-29.22	0.9198	-9999	-9999	-9999
2000	328	83100	83700	83400	35.2	6.45	-30.33	-9999	-29.42	0.9096	-9999	-9999	-9999
2000	328	83700	84300	84000	38.1	5.9	-30.4	-9999	-29.51	0.8892	-9999	-9999	-9999
2000	328	84300	84900	84600	41.3	5.28	-30.47	-9999	-29.67	0.7993	-9999	-9999	-9999
2000	328	84900	85500	85200	44	4.94	-30.52	-9999	-29.61	0.9093	-9999	-9999	-9999
2000	328	85500	86100	85800	45.8001	4.37	-30.35	-9999	-29.61	0.7387	-9999	-9999	-9999
2000	328	86100	86700	86400	41.1997	4.41	-29.66	-9999	-29.39	0.2693	-9999	-9999	-9999
2000	329	300	900	600	33.2002	4.86	-28.97	-9999	-29.02	-0.04979	-9999	-9999	-9999
2000	329	900	1500	1200	31.0001	5.12	-28.73	-9999	-28.84	-0.10927	-9999	-9999	-9999
2000	329	1500	2100	1800	27.8	5.51	-28.64	-9999	-28.78	-0.13918	-9999	-9999	-9999
2000	329	2100	2700	2400	27.4999	5.52	-28.66	-9999	-28.77	-0.10906	-9999	-9999	-9999
2000	329	2700	3300	3000	27.3	5.5	-28.73	-9999	-28.84	-0.10927	-9999	-9999	-9999
2000	329	3300	3900	3600	31.1	5.3	-28.99	-9999	-29.16	-0.1693	-9999	-9999	-9999
2000	329	3900	4500	4200	31.7002	5.3	-28.88	-9999	-29.12	-0.2395	-9999	-9999	-9999
2000	329	4500	5100	4800	29.0998	5.96	-28.57	-9999	-28.78	-0.20928	-9999	-9999	-9999
2000	329	5100	5700	5400	29.6	5.68	-28.48	-9999	-28.7	-0.2192	-9999	-9999	-9999
2000	329	5700	6300	6000	30.5002	5.34	-28.55	-9999	-28.74	-0.18889	-9999	-9999	-9999
2000	329	6300	6900	6600	30.7002	5.05	-28.59	-9999	-28.85	-0.2585	-9999	-9999	-9999
2000	329	6900	7500	7200	27.6002	4.94	-28.61	-9999	-28.89	-0.2774	-9999	-9999	-9999
2000	329	7500	8100	7800	28.1002	5.04	-28.89	-9999	-29.05	-0.15939	-9999	-9999	-9999
2000	329	8100	8700	8400	29	4.98	-29.23	-9999	-29.21	0.02032	202.141	49.6977	-9999
2000	329	8700	9300	9000	31.1	5.13	-29.38	-9999	-29.2	0.1792	142.41	13.351	-9999
2000	329	9300	9900	9600	31.0999	4.89	-29.31	-9999	-29.24	0.0697	135.131	12.3592	-9999
2000	329	9900	10500	10200	29.3001	5.03	-29.18	-9999	-29.28	-0.09949	122.374	10.757	-9999
2000	329	10500	11100	10800	26.7999	5.55	-29.04	-9999	-29.05	-0.01	117.325	9.13362	-9999
2000	329	11100	11700	11400	24.4001	5.65	-28.89	-9999	-29.04	-0.1499	122.341	13.4435	-9999
2000	329	11700	12300	12000	24.1999	5.35	-28.88	-9999	-29.01	-0.1298	115.742	18.9504	-9999
2000	329	12300	12900	12600	23.2	5.18	-28.75	-9999	-28.87	-0.11875	114.454	9.84379	-9999
2000	329	12900	13500	13200	21.7002	5.5	-28.59	-9999	-28.58	0.01021	108.583	8.92186	-9999
2000	329	13500	14100	13800	19.9	5.84	-28.54	-9999	-28.74	-0.1991	108.116	8.73467	-9999
2000	329	14100	14700	14400	20.1	5.82	-28.51	-9999	-28.63	-0.11959	104.11	8.25123	-9999
2000	329	14700	15300	15000	18.3002	5.56	-28.36	-9999	-28.47	-0.10927	99.5868	10.6776	-9999
2000	329	15300	15900	15600	14.1999	5.19	-28.47	-9999	-28.58	-0.11	105.159	8.42451	-9999
2000	329	15900	16500	16200	12.7	4.38	-28.63	-9999	-28.74	-0.10948	118.092	9.47206	-9999
2000	329	16500	17100	16800	15.9005	3.79	-28.73	-9999	-28.74	-0.00979	121.055	8.51031	-9999
2000	329	17100	17700	17400	19.1	3.58	-28.26	-9999	-28.36	-0.09971	118.056	9.03408	-9999
2000	329	17700	18300	18000	19.2001	4.4	-27.68	-9999	-27.94	-0.2594	105.472	8.83237	-9999
2000	329	18300	18900	18600	16.2006	5.15	-27.26	-9999	-27.51	-0.2491	93.4781	7.35419	-9999
2000	329	18900	19500	19200	12.4999	5.53	-26.98	-9999	-27.2	-0.2195	86.5138	8.77112	-9999
2000	329	19500	20100	19800	4.59855	6.17	-26.79	-9999	-26.99	-0.19929	78.4752	9.68629	-9999
2000	329	20100	20700	20400	4.50008	6.65	-26.9	-9999	-26.94	-0.03979	70.5864	7.59362	-9999
2000	329	20700	21300	21000	10.3999	6.22	-27.08	-9999	-27.12	-0.0399	83.4448	7.68248	-9999
2000	329	21300	21900	21600	11.0001	6.35	-27.3	-9999	-27.27	0.02979	85.0958	10.2969	-9999
2000	329	21900	22500	22200	13.5	5.97	-27.6	-9999	-27.5	0.09979	83.4206	7.58561	-9999
2000	329	22500	23100	22800	13.8	5.83	-27.84	-9999	-27.8	0.03948	83.8027	7.36395	-9999
2000	329	23100	23700	23400	13.1	6.26	-27.72	-9999	-27.76	-0.03958	82.2956	7.24418	-9999
2000	329	23700	24300	24000	12.6	6.51	-27.74	-9999	-27.7	0.04	88.6517	6.99498	-9999
2000	329	24300	24900	24600	13.3	6.51	-28.04	-9999	-27.91	0.12919	89.3673	7.49408	-9999
2000	329	24900	25500	25200	14.7	6.54	-28.29	-9999	-28.07	0.2191	90.9962	6.69741	-9999
2000	329	25500	26100	25800	15.4	6.67	-28.31	-9999	-28.13	0.17909	89.5447	6.65126	-9999
2000	329	26100	26700	26400	16.7	6.51	-28.71	-9999	-28.5	0.2091	89.0894	7.26679	-9999
2000	329	26700	27300	27000	14.5999	6.47	-28.53	-9999	-28.16	0.36929	91.6364	6.84848	-9999
2000	329	27300	27900	27600	15	6.4	-27.79	-9999	-27.74	0.0499	88.4018	7.78603	-9999
2000	329	27900	28500	28200	16.4	5.85	-27.98	-9999	-28.01	-0.02958	91.2262	6.57945	-9999
2000	329	28500	29100	28800	16.5	5.77	-28.28	-9999	-28.17	0.1098	89.3462	6.37873	-9999
2000	329	29100	29700	29400	16.7001	5.54	-28.49	-9999	-28.3	0.1897	97.4712	8.70816	-9999
2000	329	29700	30300	30000	14.5	5.73	-28.28	-9999	-28.09	0.1895	95.2431	6.8191	-9999
2000	329	30300	30900	30600	14.5	6.06	-27.84	-9999	-27.63	0.20889	93.329	6.78577	-9999
2000	329	30900	31500	31200	14.6999	6.2	-27.8	-9999	-27.7	0.09919	87.5708	8.10325	-9999
2000	329	31500	32100	31800	11.6	6.38	-27.9	-9999	-27.86	0.03958	76.24	6.45052	-9999
2000	329	32100	32700	32400	13.2	6.57	-27.62	-9999	-27.63	-0.00958	71.8792	5.88681	-9999
2000	329	32700	33300	33000	11.6	6.46	-27.64	-9999	-27.52	0.11938	69.407	6.98318	-9999
2000	329	33300	33900	33600	14.5	6.57	-27.82	-9999	-27.71	0.10906	81.8186	7.1844	-9999
2000	329	33900	34500	34200	13.9999	6.68	-28.12	-9999	-27.98	0.13938	85.0959	6.185	-9999
2000	329	34500	35100	34800	12.9	6.74	-28.5	-9999	-28.36	0.13938	85.7752	6.41373	-9999
2000	329	35100	35700	35400	16.3	6.17	-28.69	-9999	-28.44	0.2497	91.7316	6.541	-9999
2000	329	35700	36300	36000	19.1	5.59	-28.68	-9999	-28.5	0.1792	98.3563	7.71985	-9999
2000	329	36300	36900	36600	16	5.64	-28.77	-9999	-28.55	0.21919	100.08	6.80472	-9999
2000	329	36900	37500	37200	15.4	5.95	-28.87	-9999	-28.57	0.29879	100.881	6.65832	-9999
2000	329	37500	38100	37800	15.4	6.06	-28.97	-9999	-28.71	0.25899	102.367	7.37673	-9999
2000	329	38100	38700	38400	15.1	6.03	-28.88	-9999	-28.6	0.2774	102.255	7.17742	-9999
2000	329	38700	39300	39000	14.9	6.03	-28.88	-9999	-28.63	0.248	98.1251	6.45875	-9999
2000	329	39300	39900	39600	14.8	5.81	-28.94	-9999	-28.66	0.2788	101.584	6.60099	-9999
2000	329	39900	40500	40200	12	6.05	-28.95	-9999	-28.73	0.2188	100.353	7.87679	-9999
2000	329	40500	41100	40800	15.6001	6.51	-29.02	-9999	-28.69	0.3298	98.8786	6.38618	-9999
2000	329	41100	41700	41400	17.8	6.58	-28.95	-9999	-28.63	0.3181	96.7695	7.54844	-9999
2000	329	41700	42300	42000	19.2	6.54	-29.03	-9999	-28.59	0.4396	98.1929	7.12149	-9999
2000	329	42300	42900	42600	22.7	6.57	-29.11	-9999	-28.51	0.5995	103.332	6.5276	-9999
2000	329	42900	43500	43200	24.3	6.22	-29.26	-9999	-28.78	0.4795	105.615	7.03817	-9999
2000	329	43500	44100	43800	24.1	6.09	-29.3	-9999	-28.8	0.4997	105.657	7.26399	-9999
2000	329	44100	44700	44400	24.9	6.3	-29.3	-9999	-28.8	0.5	103.454	6.40506	-9999
2000	329	44700	45300	45000	23.9	6.99	-29.23	-9999	-28.66	0.5688	101.677	7.03937	-9999
2000	329	45300	45900	45600	22.4	6.74	-29.18	-9999	-28.64	0.5389	97.374	6.00615	-9999
2000	329	45900	46500	46200	21.6	6.55	-29.22	-9999	-28.81	0.4093	97.9001	6.7778	-9999
2000	329	46500	47100	46800	24.8	6.02	-29.27	-9999	-28.82	0.4497	105.192	6.83266	-9999
2000	329	47100	47700	47400	25.3999	6.1	-29.32	-9999	-28.86	0.46	111.539	8.18914	-9999
2000	329	47700	48300	48000	24.3	6.12	-29.32	-9999	-28.78	0.5396	99.5397	6.13971	-9999
2000	329	48300	48900	48600	25.3	6.17	-29.28	-9999	-28.94	0.3399	96.5875	6.37616	-9999
2000	329	48900	49500	49200	25.2	6.01	-29.22	-9999	-28.95	0.2697	97.3253	6.68769	-9999
2000	329	49500	50100	49800	22.3003	6.5	-29.1	-9999	-28.89	0.20959	92.5948	6.57126	-9999
2000	329	50100	50700	50400	16.8	6.84	-28.79	-9999	-28.71	0.07895	80.2548	7.40929	-9999
2000	329	50700	51300	51000	14.7	6.39	-28.47	-9999	-28.41	0.06	71.1304	5.86619	-9999
2000	329	51300	51900	51600	17.1	6.44	-28.52	-9999	-28.23	0.2897	71.8818	5.72612	-9999
2000	329	51900	52500	52200	21.0001	6.2	-28.62	-9999	-28.3	0.3199	74.2217	6.17331	-9999
2000	329	52500	53100	52800	24.5	6.11	-28.62	-9999	-28.23	0.3898	80.705	6.20924	-9999
2000	329	53100	53700	53400	26.2997	6.05	-28.56	-9999	-28.19	0.3698	77.4172	6.35316	-9999
2000	329	53700	54300	54000	33.7	5.5	-28.76	-9999	-28.46	0.2998	83.8344	7.3476	-9999
2000	329	54300	54900	54600	33.4999	5.75	-28.77	-9999	-28.4	0.3699	87.3445	5.96408	-9999
2000	329	54900	55500	55200	34.6001	5.88	-28.82	-9999	-28.28	0.5398	88.7371	6.09367	-9999
2000	329	55500	56100	55800	35.4	6.09	-28.76	-9999	-28.17	0.5896	85.4952	6.33121	-9999
2000	329	56100	56700	56400	36.7	5.83	-28.89	-9999	-28.4	0.4896	87.1709	6.01288	-9999
2000	329	56700	57300	57000	35	6.2	-28.81	-9999	-28.15	0.6597	86.8362	6.06679	-9999
2000	329	57300	57900	57600	31.5999	6.46	-28.72	-9999	-28.09	0.6291	85.0762	6.1644	-9999
2000	329	57900	58500	58200	31.9	5.99	-28.7	-9999	-28.08	0.6182	85.5782	5.88154	-9999
2000	329	58500	59100	58800	30.7	6.55	-28.4	-9999	-27.84	0.5589	79.0484	7.15778	-9999
2000	329	59100	59700	59400	25.8999	6.83	-28.01	-9999	-27.43	0.5794	72.2531	6.37265	-9999
2000	329	59700	60300	60000	26.8	7.51	-27.57	-9999	-27.17	0.3996	70.4796	6.11622	-9999
2000	329	60300	60900	60600	23.0999	7.49	-27.27	-9999	-26.9	0.3695	70.2905	5.90282	-9999
2000	329	60900	61500	61200	19.6	7.46	-27	-9999	-26.74	0.2595	67.5101	6.12346	-9999
2000	329	61500	62100	61800	23.6	7.11	-27.13	-9999	-26.94	0.1899	77.3839	6.13251	-9999
2000	329	62100	62700	62400	24.5	7.73	-26.88	-9999	-26.64	0.2391	68.935	10.1707	-9999
2000	329	62700	63300	63000	21.2001	7.18	-26.65	-9999	-26.41	0.24	56.9903	6.06084	-9999
2000	329	63300	63900	63600	25.8	6.42	-26.87	-9999	-26.58	0.2883	66.8181	5.68508	-9999
2000	329	63900	64500	64200	26.7	6.82	-26.96	-9999	-26.62	0.3396	68.2209	5.68659	-9999
2000	329	64500	65100	64800	25.6	7.43	-26.73	-9999	-26.41	0.3197	60.1112	6.25265	-9999
2000	329	65100	65700	65400	24.5	7.37	-26.23	-9999	-26.03	0.19918	47.2243	6.62637	-9999
2000	329	65700	66300	66000	28.9	7.11	-26.46	-9999	-26.13	0.3287	58.7337	6.42054	-9999
2000	329	66300	66900	66600	32.1001	7.11	-26.64	-9999	-26.4	0.23949	69.9512	6.56332	-9999
2000	329	66900	67500	67200	34.2	7	-26.81	-9999	-26.53	0.2792	76.6717	5.56409	-9999
2000	329	67500	68100	67800	30.9003	7.27	-26.89	-9999	-26.47	0.4188	79.9769	6.60475	-9999
2000	329	68100	68700	68400	27.1001	8.09	-26.75	-9999	-26.18	0.5694	77.3072	5.87699	-9999
2000	329	68700	69300	69000	30.5	8.17	-26.7	-9999	-26.07	0.6298	76.9279	6.16328	-9999
2000	329	69300	69900	69600	32.6	7.26	-26.85	-9999	-26.37	0.4798	82.2205	6.0319	-9999
2000	329	69900	70500	70200	32.5	7	-26.93	-9999	-26.41	0.52	82.8825	5.57787	-9999
2000	329	70500	71100	70800	30.3	7.26	-26.79	-9999	-26.22	0.5697	81.8258	6.22316	-9999
2000	329	71100	71700	71400	30.2999	7.31	-26.75	-9999	-26.21	0.5396	80.2496	6.06035	-9999
2000	329	71700	72300	72000	33	6.91	-26.9	-9999	-26.5	0.3988	82.349	16.7856	-9999
2000	329	72300	72900	72600	32.6	7.15	-27.11	-9999	-26.67	0.44	89.3509	6.70485	-9999
2000	329	72900	73500	73200	35.2	6.97	-27.08	-9999	-26.5	0.58	94.6559	6.48206	-9999
2000	329	73500	74100	73800	37.3	6.48	-27.04	-9999	-26.44	0.5998	94.7824	6.33968	-9999
2000	329	74100	74700	74400	36.4	6.65	-26.86	-9999	-26.19	0.6686	93.5523	6.36269	-9999
2000	329	74700	75300	75000	36.7	6.83	-26.61	-9999	-26.17	0.4396	90.5942	5.97627	-9999
2000	329	75300	75900	75600	35.4	6.8	-26.59	-9999	-26.31	0.2799	86.3264	5.64859	-9999
2000	329	75900	76500	76200	35.6	6.41	-26.61	-9999	-26.28	0.3295	86.865	6.20338	-9999
2000	329	76500	77100	76800	35	6.99	-26.21	-9999	-25.86	0.3496	81.7418	6.65669	-9999
2000	329	77100	77700	77400	35.2	7.22	-26.21	-9999	-25.9	0.3095	81.2427	6.05366	-9999
2000	329	77700	78300	78000	38.7	6.56	-26.36	-9999	-26.15	0.2089	81.0004	5.98312	-9999
2000	329	78300	78900	78600	41.7997	6.62	-26.43	-9999	-26.21	0.219	79.1254	5.9891	-9999
2000	329	78900	79500	79200	45.5004	6.73	-26.7	-9999	-26.37	0.3294	79.3618	6.76311	-9999
2000	329	79500	80100	79800	40.7	7.39	-26.48	-9999	-26.14	0.3393	79.288	5.87894	-9999
2000	329	80100	80700	80400	39.6	7.55	-26.17	-9999	-25.94	0.2295	80.2339	6.83365	-9999
2000	329	80700	81300	81000	37.8	7.92	-26.47	-9999	-26.14	0.3287	73.4567	5.96503	-9999
2000	329	81300	81900	81600	37.8	7.61	-26.66	-9999	-26.36	0.2998	75.9923	5.85526	-9999
2000	329	81900	82500	82200	35.3	8.19	-26.69	-9999	-26.3	0.3892	80.1664	5.89405	-9999
2000	329	82500	83100	82800	34.3	8.62	-26.68	-9999	-26.23	0.4497	79.0751	5.80243	-9999
2000	329	83100	83700	83400	35.7	8.62	-26.8	-9999	-26.29	0.51	78.7271	7.30408	-9999
2000	329	83700	84300	84000	36.4	8.66	-26.81	-9999	-26.32	0.49	77.7811	5.8944	-9999
2000	329	84300	84900	84600	36.5	8.66	-26.83	-9999	-26.38	0.4498	78.5233	5.69976	-9999
2000	329	84900	85500	85200	35.3	8.87	-26.87	-9999	-26.39	0.48	78.636	5.82547	-9999
2000	329	85500	86100	85800	38.6	8.37	-26.92	-9999	-26.46	0.4591	77.556	7.59575	-9999
2000	329	86100	86700	86400	35.1115	8.32222	-26.81	-9999	-26.47	0.3393	78.0923	8.54126	-9999
2000	330	300	900	600	28.7	9.47	-26.54	-9999	-26.18	0.3599	69.7783	5.77534	-9999
2000	330	900	1500	1200	28.8	9.45	-26.86	-9999	-26.41	0.4496	69.4084	6.12835	-9999
2000	330	1500	2100	1800	28.5	9.97	-26.66	-9999	-26.29	0.3699	69.6803	6.02766	-9999
2000	330	2100	2700	2400	26.8	10.11	-26.67	-9999	-26.39	0.2799	68.6775	6.03345	-9999
2000	330	2700	3300	3000	26.2	10.55	-26.58	-9999	-26.36	0.2192	65.2843	6.26305	-9999
2000	330	3300	3900	3600	26	10.34	-26.61	-9999	-26.4	0.20949	67.9049	6.3699	-9999
2000	330	3900	4500	4200	25.9	9.76	-26.81	-9999	-26.5	0.3085	67.892	5.58738	-9999
2000	330	4500	5100	4800	26	9.57	-26.87	-9999	-26.62	0.2486	66.8755	5.65965	-9999
2000	330	5100	5700	5400	25.9	9.09	-27.07	-9999	-26.93	0.13969	68.4405	5.39143	-9999
2000	330	5700	6300	6000	27	8.69	-27.18	-9999	-27.12	0.05938	68.2798	5.37315	-9999
2000	330	6300	6900	6600	27.6	8.64	-27.26	-9999	-27.21	0.05	68.0378	5.05457	-9999
2000	330	6900	7500	7200	27.3	8.67	-27.44	-9999	-27.14	0.2989	69.4029	5.03099	-9999
2000	330	7500	8100	7800	25.3	8.67	-27.45	-9999	-27.05	0.3988	68.6326	5.14015	-9999
2000	330	8100	8700	8400	22.9	8.62	-27.36	-9999	-27.1	0.2592	66.3064	5.53883	-9999
2000	330	8700	9300	9000	22.9	8.64	-27.37	-9999	-27.19	0.1792	66.2129	4.9932	-9999
2000	330	9300	9900	9600	21.3	9.24	-27.36	-9999	-27.16	0.1988	69.0984	5.31231	-9999
2000	330	9900	10500	10200	21.7	9.52	-27.41	-9999	-27.19	0.2189	67.3782	5.62737	-9999
2000	330	10500	11100	10800	22.6	9.02	-27.42	-9999	-27.22	0.199	67.6633	5.34414	-9999
2000	330	11100	11700	11400	23.8	8.66	-27.58	-9999	-27.33	0.2497	66.2173	5.40404	-9999
2000	330	11700	12300	12000	23.7	8.24	-27.71	-9999	-27.62	0.08959	64.2253	5.54008	-9999
2000	330	12300	12900	12600	24.9	7.76	-27.77	-9999	-27.81	-0.03937	63.2857	5.3949	-9999
2000	330	12900	13500	13200	23.1	7.53	-27.58	-9999	-27.73	-0.14887	59.6336	5.18539	-9999
2000	330	13500	14100	13800	19.3001	8.49	-27.24	-9999	-27.42	-0.1793	57.741	5.71792	-9999
2000	330	14100	14700	14400	15.8	9.54	-27.02	-9999	-27.19	-0.16888	56.8539	5.18101	-9999
2000	330	14700	15300	15000	14.8	10.04	-27.02	-9999	-27.3	-0.2791	55.3415	5.25958	-9999
2000	330	15300	15900	15600	14.9	9.88	-27.05	-9999	-27.31	-0.2587	56.4939	5.88355	-9999
2000	330	15900	16500	16200	14.9	9.48	-27.02	-9999	-27.2	-0.17878	56.9406	5.77767	-9999
2000	330	16500	17100	16800	17.2	9.51	-27	-9999	-27.15	-0.1495	57.1336	5.6425	-9999
2000	330	17100	17700	17400	18.7	10.02	-27	-9999	-27.19	-0.1895	54.7545	5.57714	-9999
2000	330	17700	18300	18000	17.5001	10.15	-26.92	-9999	-27.2	-0.2798	56.6065	5.41065	-9999
2000	330	18300	18900	18600	17.7999	10.6	-26.85	-9999	-27.09	-0.2399	53.6599	5.19339	-9999
2000	330	18900	19500	19200	20.1	10.31	-26.76	-9999	-27	-0.2394	57.2522	5.60075	-9999
2000	330	19500	20100	19800	21.1	9.74	-26.82	-9999	-27.03	-0.2093	59.2517	5.34057	-9999
2000	330	20100	20700	20400	19.4	9.91	-26.89	-9999	-27.2	-0.3099	58.2664	5.64565	-9999
2000	330	20700	21300	21000	19.9	10.67	-26.77	-9999	-27.04	-0.2699	60.1146	5.62142	-9999
2000	330	21300	21900	21600	18.8	10.1	-26.66	-9999	-26.85	-0.18857	64.4265	5.5883	-9999
2000	330	21900	22500	22200	15.7	8.97	-27.1	-9999	-27.27	-0.16949	67.4655	5.95572	-9999
2000	330	22500	23100	22800	22.0002	9.43	-27.45	-9999	-27.33	0.11938	68.2575	5.42193	-9999
2000	330	23100	23700	23400	24.2	9.53	-27.57	-9999	-27.39	0.18	72.6372	5.18027	-9999
2000	330	23700	24300	24000	25.4	9.25	-27.65	-9999	-27.39	0.26	74.0237	5.67727	-9999
2000	330	24300	24900	24600	26.3	9.05	-27.73	-9999	-27.38	0.3498	73.8919	5.60451	-9999
2000	330	24900	25500	25200	23.9	8.87	-27.76	-9999	-27.36	0.4	72.3643	5.22397	-9999
2000	330	25500	26100	25800	24.3	9.59	-27.67	-9999	-27.22	0.4497	74.3874	5.4878	-9999
2000	330	26100	26700	26400	22.8	9.03	-27.74	-9999	-27.46	0.2799	73.6808	5.47778	-9999
2000	330	26700	27300	27000	20.4	8.56	-27.87	-9999	-27.5	0.3689	73.576	5.60145	-9999
2000	330	27300	27900	27600	22.5001	8.1	-27.9	-9999	-27.54	0.3588	75.3443	5.45791	-9999
2000	330	27900	28500	28200	25.0999	7.53	-27.99	-9999	-27.64	0.3492	79.5234	5.66304	-9999
2000	330	28500	29100	28800	27.6	7.24	-28	-9999	-27.63	0.3693	77.8622	5.81382	-9999
2000	330	29100	29700	29400	25.3	7.2	-27.98	-9999	-27.67	0.3094	76.036	5.85838	-9999
2000	330	29700	30300	30000	26.4001	7.11	-27.95	-9999	-27.65	0.299	75.8896	5.86926	-9999
2000	330	30300	30900	30600	19.1999	7.1	-27.86	-9999	-27.52	0.3388	73.4576	6.03344	-9999
2000	330	30900	31500	31200	18.8	7.64	-27.8	-9999	-27.38	0.4196	72.8084	5.80328	-9999
2000	330	31500	32100	31800	14.5	8.06	-27.75	-9999	-27.37	0.3799	71.6066	5.78773	-9999
2000	330	32100	32700	32400	9.99991	8.36	-27.75	-9999	-27.53	0.21909	74.0897	6.72972	-9999
2000	330	32700	33300	33000	9.5	8.74	-27.72	-9999	-27.54	0.17877	75.7656	5.94114	-9999
2000	330	33300	33900	33600	11.1	9.2	-27.77	-9999	-27.56	0.2091	76.1964	5.83378	-9999
2000	330	33900	34500	34200	12.2	9.26	-27.62	-9999	-27.42	0.1998	73.0431	5.87446	-9999
2000	330	34500	35100	34800	10.3	9.25	-27.46	-9999	-27.34	0.11917	75.5048	5.75258	-9999
2000	330	35100	35700	35400	5.79997	9.03	-27.4	-9999	-27.42	-0.02	75.6849	5.30894	-9999
2000	330	35700	36300	36000	4.49998	9.32	-27.55	-9999	-27.63	-0.07895	70.3187	7.26798	-9999
2000	330	36300	36900	36600	5.2	10.16	-27.21	-9999	-27.43	-0.2185	61.9527	5.81788	-9999
2000	330	36900	37500	37200	4.9	10.36	-26.96	-9999	-27.24	-0.2797	58.5259	3.96796	-9999
2000	330	37500	38100	37800	3.40004	9.86	-26.8	-9999	-27.07	-0.2698	-9999	-9999	-9999
2000	330	38100	38700	38400	0.899998	9.32	-26.6	-9999	-26.93	-0.3288	-9999	-9999	-9999
2000	330	38700	39300	39000	0.100088	9.29	-26.37	-9999	-26.71	-0.3398	57.2434	6.23597	-9999
2000	330	39300	39900	39600	358.6	9.1	-26.27	-9999	-26.56	-0.2899	54.5228	5.27828	-9999
2000	330	39900	40500	40200	359.7	9.44	-26.11	-9999	-26.39	-0.278	56.0176	5.58892	-9999
2000	330	40500	41100	40800	2.39997	9.33	-25.94	-9999	-26.28	-0.3397	57.0656	5.05188	-9999
2000	330	41100	41700	41400	5.59998	8.95	-25.78	-9999	-26.09	-0.3095	56.4421	5.23342	-9999
2000	330	41700	42300	42000	3.20019	8.1	-25.75	-9999	-25.95	-0.19919	53.7105	6.21911	-9999
2000	330	42300	42900	42600	4.70003	7.49	-25.89	-9999	-25.9	-0.00937	50.0583	5.20776	-9999
2000	330	42900	43500	43200	8.69996	7.15	-26.15	-9999	-25.96	0.1897	55.4594	5.69453	-9999
2000	330	43500	44100	43800	3.8999	7.03	-26.42	-9999	-26.22	0.19869	56.8211	5.30111	-9999
2000	330	44100	44700	44400	3.09998	7.08	-26.6	-9999	-26.37	0.2297	56.9587	5.62698	-9999
2000	330	44700	45300	45000	3.9	7.11	-26.68	-9999	-26.44	0.2397	59.489	5.3112	-9999
2000	330	45300	45900	45600	4.89999	7.11	-26.76	-9999	-26.5	0.2598	66.0032	5.56518	-9999
2000	330	45900	46500	46200	6.29999	7.34	-26.57	-9999	-26.45	0.12	65.4395	5.47643	-9999
2000	330	46500	47100	46800	7.49994	7.19	-26.52	-9999	-26.5	0.02	63.1631	5.08345	-9999
2000	330	47100	47700	47400	14.0002	6.85	-26.66	-9999	-26.6	0.05874	65.4596	5.48833	-9999
2000	330	47700	48300	48000	16.4	6.89	-26.75	-9999	-26.57	0.17836	65.7971	6.03116	-9999
2000	330	48300	48900	48600	15.9	6.89	-26.96	-9999	-26.6	0.3586	67.4665	5.3804	-9999
2000	330	48900	49500	49200	16.2	7.22	-26.97	-9999	-26.59	0.3785	68.091	5.49048	-9999
2000	330	49500	50100	49800	15.5	7.22	-26.99	-9999	-26.69	0.2991	69.4994	5.79072	-9999
2000	330	50100	50700	50400	15.3	7.13	-27.02	-9999	-26.75	0.2696	69.5046	5.58725	-9999
2000	330	50700	51300	51000	13.6999	7.41	-27.06	-9999	-26.73	0.33	72.1259	5.9485	-9999
2000	330	51300	51900	51600	16.2001	7.16	-27.14	-9999	-26.78	0.3596	77.7891	6.29266	-9999
2000	330	51900	52500	52200	18.4	6.94	-27.2	-9999	-26.8	0.399	83.9607	5.6655	-9999
2000	330	52500	53100	52800	15.25	7.2875	-27.1625	-9999	-26.8875	0.274875	83.6887	6.0752	-9999
2000	330	53100	53700	53400	-9999	-9999	-9999	-9999	-9999	-9999	85.3073	5.85865	-9999
2000	330	53700	54300	54000	-9999	-9999	-9999	-9999	-9999	-9999	84.6148	5.74726	-9999
2000	330	54300	54900	54600	-9999	-9999	-9999	-9999	-9999	-9999	81.6423	5.44919	-9999
2000	330	54900	55500	55200	-9999	-9999	-9999	-9999	-9999	-9999	82.6686	6.06687	-9999
2000	330	55500	56100	55800	-9999	-9999	-9999	-9999	-9999	-9999	82.0857	5.69994	-9999
2000	330	56100	56700	56400	-9999	-9999	-9999	-9999	-9999	-9999	77.9946	7.08013	-9999
2000	330	56700	57300	57000	-9999	-9999	-9999	-9999	-9999	-9999	79.9775	7.13403	-9999
2000	330	57300	57900	57600	-9999	-9999	-9999	-9999	-9999	-9999	76.4176	5.7678	-9999
2000	330	57900	58500	58200	-9999	-9999	-9999	-9999	-9999	-9999	80.4644	7.67091	-9999
2000	330	58500	59100	58800	-9999	-9999	-9999	-9999	-9999	-9999	82.781	6.36312	-9999
2000	330	59100	59700	59400	-9999	-9999	-9999	-9999	-9999	-9999	87.8771	7.31427	-9999
2000	330	59700	60300	60000	-9999	-9999	-9999	-9999	-9999	-9999	95.7738	6.14883	-9999
2000	330	60300	60900	60600	-9999	-9999	-9999	-9999	-9999	-9999	100.898	6.05254	-9999
2000	330	60900	61500	61200	-9999	-9999	-9999	-9999	-9999	-9999	103.085	6.36688	-9999
2000	330	61500	62100	61800	-9999	-9999	-9999	-9999	-9999	-9999	103.744	6.88145	-9999
2000	330	62100	62700	62400	-9999	-9999	-9999	-9999	-9999	-9999	105.776	6.08765	-9999
2000	330	62700	63300	63000	-9999	-9999	-9999	-9999	-9999	-9999	104.691	5.71496	-9999
2000	330	63300	63900	63600	-9999	-9999	-9999	-9999	-9999	-9999	107.224	6.22642	-9999
2000	330	63900	64500	64200	-9999	-9999	-9999	-9999	-9999	-9999	106.74	5.78337	-9999
2000	330	64500	65100	64800	-9999	-9999	-9999	-9999	-9999	-9999	106.945	6.04903	-9999
2000	330	65100	65700	65400	-9999	-9999	-9999	-9999	-9999	-9999	106.677	6.08222	-9999
2000	330	65700	66300	66000	-9999	-9999	-9999	-9999	-9999	-9999	106.506	6.37038	-9999
2000	330	66300	66900	66600	-9999	-9999	-9999	-9999	-9999	-9999	107.05	6.67292	-9999
2000	330	66900	67500	67200	-9999	-9999	-9999	-9999	-9999	-9999	107.194	6.06521	-9999
2000	330	67500	68100	67800	-9999	-9999	-9999	-9999	-9999	-9999	106.582	6.39463	-9999
2000	330	68100	68700	68400	-9999	-9999	-9999	-9999	-9999	-9999	108.462	6.50028	-9999
2000	330	68700	69300	69000	-9999	-9999	-9999	-9999	-9999	-9999	105.95	6.42733	-9999
2000	330	69300	69900	69600	-9999	-9999	-9999	-9999	-9999	-9999	106.341	6.20052	-9999
2000	330	69900	70500	70200	-9999	-9999	-9999	-9999	-9999	-9999	105.944	5.83988	-9999
2000	330	70500	71100	70800	-9999	-9999	-9999	-9999	-9999	-9999	107.622	6.4317	-9999
2000	330	71100	71700	71400	-9999	-9999	-9999	-9999	-9999	-9999	107.156	5.82127	-9999
2000	330	71700	72300	72000	-9999	-9999	-9999	-9999	-9999	-9999	109.304	6.33346	-9999
2000	330	72300	72900	72600	-9999	-9999	-9999	-9999	-9999	-9999	111.472	6.2554	-9999
2000	330	72900	73500	73200	-9999	-9999	-9999	-9999	-9999	-9999	111.919	6.12571	-9999
2000	330	73500	74100	73800	-9999	-9999	-9999	-9999	-9999	-9999	111.329	6.1928	-9999
2000	330	74100	74700	74400	-9999	-9999	-9999	-9999	-9999	-9999	110.858	6.06678	-9999
2000	330	74700	75300	75000	-9999	-9999	-9999	-9999	-9999	-9999	110.652	6.21564	-9999
2000	330	75300	75900	75600	-9999	-9999	-9999	-9999	-9999	-9999	112.825	6.59585	-9999
2000	330	75900	76500	76200	-9999	-9999	-9999	-9999	-9999	-9999	114.319	6.52924	-9999
2000	330	76500	77100	76800	-9999	-9999	-9999	-9999	-9999	-9999	111.927	6.42519	-9999
2000	330	77100	77700	77400	-9999	-9999	-9999	-9999	-9999	-9999	112.367	6.42778	-9999
2000	330	77700	78300	78000	-9999	-9999	-9999	-9999	-9999	-9999	112.223	6.65017	-9999
2000	330	78300	78900	78600	-9999	-9999	-9999	-9999	-9999	-9999	112.658	6.18298	-9999
2000	330	78900	79500	79200	-9999	-9999	-9999	-9999	-9999	-9999	110.007	6.35436	-9999
2000	330	79500	80100	79800	-9999	-9999	-9999	-9999	-9999	-9999	108.825	6.31836	-9999
2000	330	80100	80700	80400	-9999	-9999	-9999	-9999	-9999	-9999	107.549	6.80785	-9999
2000	330	80700	81300	81000	-9999	-9999	-9999	-9999	-9999	-9999	109.642	6.46293	-9999
2000	330	81300	81900	81600	-9999	-9999	-9999	-9999	-9999	-9999	111.333	6.78367	-9999
2000	330	81900	82500	82200	-9999	-9999	-9999	-9999	-9999	-9999	112.625	6.45571	-9999
2000	330	82500	83100	82800	-9999	-9999	-9999	-9999	-9999	-9999	115.307	6.08346	-9999
2000	330	83100	83700	83400	-9999	-9999	-9999	-9999	-9999	-9999	118.264	6.8832	-9999
2000	330	83700	84300	84000	-9999	-9999	-9999	-9999	-9999	-9999	119.263	6.62587	-9999
2000	330	84300	84900	84600	-9999	-9999	-9999	-9999	-9999	-9999	121.569	7.15006	-9999
2000	330	84900	85500	85200	-9999	-9999	-9999	-9999	-9999	-9999	119.636	6.74082	-9999
2000	330	85500	86100	85800	-9999	-9999	-9999	-9999	-9999	-9999	115.272	6.79092	-9999
2000	330	86100	86700	86400	-9999	-9999	-9999	-9999	-9999	-9999	113.415	6.5704	-9999
2000	331	300	900	600	-9999	-9999	-9999	-9999	-9999	-9999	115.189	6.82525	-9999
2000	331	900	1500	1200	-9999	-9999	-9999	-9999	-9999	-9999	115.836	6.62301	-9999
2000	331	1500	2100	1800	-9999	-9999	-9999	-9999	-9999	-9999	111.684	6.42578	-9999
2000	331	2100	2700	2400	22	6.9	-27.4	-9999	-27	0.399	107.178	5.93395	-9999
2000	331	2700	3300	3000	23	6.94	-27.42	-9999	-26.92	0.5	104.432	6.72757	-9999
2000	331	3300	3900	3600	25.3999	6.98	-27.41	-9999	-26.77	0.6384	108.661	6.03203	-9999
2000	331	3900	4500	4200	28.7	7.45	-27.44	-9999	-26.52	0.9191	109.285	6.22851	-9999
2000	331	4500	5100	4800	27.3	6.67	-27.38	-9999	-26.7	0.6788	113.342	5.85536	-9999
2000	331	5100	5700	5400	26.4	5.96	-27.47	-9999	-27.05	0.4191	112.887	6.25271	-9999
2000	331	5700	6300	6000	27.7	5.64	-27.58	-9999	-27.24	0.34	115.032	7.1372	-9999
2000	331	6300	6900	6600	28.7	5.99	-27.52	-9999	-27.22	0.2997	118.048	6.72844	-9999
2000	331	6900	7500	7200	27.9	6.36	-27.55	-9999	-27.11	0.4396	112.224	6.30136	-9999
2000	331	7500	8100	7800	28.3001	6.52	-27.58	-9999	-27.04	0.54	111.575	6.41557	-9999
2000	331	8100	8700	8400	26.3	6.6	-27.46	-9999	-26.96	0.4997	114.283	6.37656	-9999
2000	331	8700	9300	9000	26.3	7.08	-27.39	-9999	-26.85	0.5392	110.628	6.18945	-9999
2000	331	9300	9900	9600	29.3	6.99	-27.53	-9999	-27.15	0.3797	113.058	6.13309	-9999
2000	331	9900	10500	10200	26.4999	6.84	-27.45	-9999	-27.06	0.3892	111.686	6.47892	-9999
2000	331	10500	11100	10800	27	6.6	-27.59	-9999	-27.22	0.37	114.534	6.16748	-9999
2000	331	11100	11700	11400	28.7	6.96	-27.5	-9999	-27.04	0.4594	113.327	6.27986	-9999
2000	331	11700	12300	12000	28.7	6.97	-27.58	-9999	-27.02	0.56	114.206	6.15836	-9999
2000	331	12300	12900	12600	29.5	6.79	-27.65	-9999	-27.08	0.5691	110.718	5.79229	-9999
2000	331	12900	13500	13200	28.7	7.56	-27.68	-9999	-26.99	0.689	104.776	7.13634	-9999
2000	331	13500	14100	13800	31.2	7.37	-27.6	-9999	-26.95	0.6497	98.5502	5.60891	-9999
2000	331	14100	14700	14400	30.3	6.7	-27.62	-9999	-27.01	0.6097	-9999	-9999	-9999
2000	331	14700	15300	15000	31.7999	6.15	-27.41	-9999	-26.92	0.4895	112.913	6.48167	-9999
2000	331	15300	15900	15600	34	5.82	-27.02	-9999	-26.65	0.3689	116.23	6.40655	-9999
2000	331	15900	16500	16200	34.5	5.29	-26.59	-9999	-26.43	0.16	109.765	6.5752	-9999
2000	331	16500	17100	16800	40.6004	5.13	-26.73	-9999	-26.76	-0.02979	113.85	7.31093	-9999
2000	331	17100	17700	17400	43.3	6.44	-26.9	-9999	-26.82	0.07832	118.763	6.29435	-9999
2000	331	17700	18300	18000	41.4001	6.67	-26.99	-9999	-26.78	0.20909	117.469	6.27898	-9999
2000	331	18300	18900	18600	40.1	6.5	-27.08	-9999	-26.8	0.2798	120.88	6.35613	-9999
2000	331	18900	19500	19200	36.9	6.22	-27.14	-9999	-26.8	0.3396	119.275	6.15256	-9999
2000	331	19500	20100	19800	35.2	5.19	-27.17	-9999	-26.87	0.2999	118.211	6.31475	-9999
2000	331	20100	20700	20400	39.0001	5.02	-27.16	-9999	-26.97	0.1895	119.093	6.36964	-9999
2000	331	20700	21300	21000	38.9	5.13	-27.17	-9999	-26.92	0.2498	117.239	6.2592	-9999
2000	331	21300	21900	21600	38	5.68	-27.2	-9999	-26.95	0.2493	119.899	6.75815	-9999
2000	331	21900	22500	22200	38.2	6.11	-27.2	-9999	-26.81	0.3891	121.173	5.6912	-9999
2000	331	22500	23100	22800	37.6	6.02	-27.19	-9999	-26.87	0.3198	121.945	6.31187	-9999
2000	331	23100	23700	23400	38.8	5.75	-27.22	-9999	-26.86	0.3595	122.018	6.23018	-9999
2000	331	23700	24300	24000	40.4	5.44	-27.21	-9999	-26.91	0.3	123.901	6.40993	-9999
2000	331	24300	24900	24600	38.2	5.22	-27.2	-9999	-27.01	0.18889	120.971	6.21449	-9999
2000	331	24900	25500	25200	39.1	5	-27.22	-9999	-27	0.2192	122.547	5.76478	-9999
2000	331	25500	26100	25800	38.4	4.58	-27.23	-9999	-26.96	0.2697	124.76	6.45888	-9999
2000	331	26100	26700	26400	39.2997	5.28	-27.19	-9999	-26.86	0.3296	122.448	6.55216	-9999
2000	331	26700	27300	27000	46.0999	3.88	-27.26	-9999	-26.91	0.3499	125.941	6.90186	-9999
2000	331	27300	27900	27600	48.8001	4.07	-27.4	-9999	-26.94	0.4596	129.443	6.97696	-9999
2000	331	27900	28500	28200	46.7002	4.65	-27.29	-9999	-26.9	0.39	126.619	6.64267	-9999
2000	331	28500	29100	28800	42.3	5.67	-27.32	-9999	-26.9	0.42	124.586	6.79877	-9999
2000	331	29100	29700	29400	45.9	4.74	-27.34	-9999	-26.97	0.3693	126.003	11.2408	-9999
2000	331	29700	30300	30000	43	5.04	-27.3	-9999	-26.93	0.3699	124.198	6.99071	-9999
2000	331	30300	30900	30600	45.5999	5.23	-27.28	-9999	-26.87	0.4098	122.057	7.01881	-9999
2000	331	30900	31500	31200	51.4997	4.43	-27.38	-9999	-26.97	0.4094	126.178	6.90595	-9999
2000	331	31500	32100	31800	49.9987	4.69	-27.45	-9999	-26.93	0.5198	125.781	7.59314	-9999
2000	331	32100	32700	32400	46.6	5.17	-27.45	-9999	-26.9	0.5491	127.917	7.21896	-9999
2000	331	32700	33300	33000	45.5997	4.55	-27.51	-9999	-27.03	0.4797	126.309	7.27937	-9999
2000	331	33300	33900	33600	41.1	4.82	-27.39	-9999	-26.91	0.4797	123.483	6.9443	-9999
2000	331	33900	34500	34200	40.4999	4.75	-27.2	-9999	-26.88	0.32	119.046	7.87282	-9999
2000	331	34500	35100	34800	43.9	4.75	-27.23	-9999	-26.8	0.4297	120.354	7.48207	-9999
2000	331	35100	35700	35400	43.0998	4.93	-27.22	-9999	-26.63	0.589	118.676	8.67332	-9999
2000	331	35700	36300	36000	45.3999	4.63	-27.37	-9999	-26.81	0.5592	126.418	7.26975	-9999
2000	331	36300	36900	36600	54.9993	3.7	-27.45	-9999	-26.87	0.5798	123.098	7.48861	-9999
2000	331	36900	37500	37200	49.6998	4.41	-27.33	-9999	-26.78	0.5489	120.562	7.48268	-9999
2000	331	37500	38100	37800	47.6001	5.02	-27.31	-9999	-26.54	0.7682	121.582	7.61282	-9999
2000	331	38100	38700	38400	42.1999	5.64	-27.04	-9999	-26.46	0.5796	110.611	6.47332	-9999
2000	331	38700	39300	39000	40.9	5.68	-26.89	-9999	-26.28	0.6086	107.917	6.51275	-9999
2000	331	39300	39900	39600	39.4	6.02	-26.79	-9999	-26.41	0.3793	106.297	6.43136	-9999
2000	331	39900	40500	40200	38.4	6.54	-26.62	-9999	-26.18	0.4398	103.448	6.34647	-9999
2000	331	40500	41100	40800	41.4001	6.26	-26.69	-9999	-26.2	0.49	106.749	5.98467	-9999
2000	331	41100	41700	41400	45.2	5.94	-26.75	-9999	-26.3	0.4497	107.83	6.31503	-9999
2000	331	41700	42300	42000	48.5	5.26	-26.86	-9999	-26.41	0.45	108.502	6.02691	-9999
2000	331	42300	42900	42600	47.8	5.18	-26.93	-9999	-26.59	0.3385	109.647	6.23187	-9999
2000	331	42900	43500	43200	44.6	6.12	-27.27	-9999	-26.53	0.739	102.271	7.479	-9999
2000	331	43500	44100	43800	46	6.16	-26.83	-9999	-26.21	0.6194	106.932	6.53804	-9999
2000	331	44100	44700	44400	47.8998	5.94	-26.78	-9999	-26.29	0.4898	107.642	6.86883	-9999
2000	331	44700	45300	45000	51.3	5.59	-26.97	-9999	-26.37	0.5997	110.601	6.45157	-9999
2000	331	45300	45900	45600	55.1	5.09	-26.94	-9999	-26.44	0.4995	113.477	6.51956	-9999
2000	331	45900	46500	46200	59.7	4.75	-26.87	-9999	-26.5	0.3693	113.981	7.44132	-9999
2000	331	46500	47100	46800	57.5998	4.67	-26.78	-9999	-26.35	0.4299	113.073	6.23488	-9999
2000	331	47100	47700	47400	51.7996	5.12	-26.51	-9999	-26.11	0.399	110.269	6.99958	-9999
2000	331	47700	48300	48000	51.2001	5.52	-26.51	-9999	-25.96	0.5497	110.055	6.05628	-9999
2000	331	48300	48900	48600	53.2999	5.05	-26.87	-9999	-26.24	0.6292	113.087	6.18241	-9999
2000	331	48900	49500	49200	59.9002	4.96	-27.23	-9999	-26.35	0.8799	115.005	8.29556	-9999
2000	331	49500	50100	49800	62.6	5.11	-27.34	-9999	-26.27	1.0699	118.57	6.17004	-9999
2000	331	50100	50700	50400	64.3	5.54	-27.47	-9999	-26.19	1.28	115.856	7.29041	-9999
2000	331	50700	51300	51000	67.4999	5.41	-27.39	-9999	-26.15	1.24	115.064	6.92241	-9999
2000	331	51300	51900	51600	71.7	4.88	-27.4	-9999	-26.09	1.31	117.459	6.74253	-9999
2000	331	51900	52500	52200	72.3	4.7	-27.39	-9999	-26.37	1.02	115.011	7.07776	-9999
2000	331	52500	53100	52800	71.8999	4.52	-27.45	-9999	-26.05	1.4	116.219	6.09288	-9999
2000	331	53100	53700	53400	76.2	4.13	-27.26	-9999	-26.32	0.9393	121.368	6.5557	-9999
2000	331	53700	54300	54000	73.9	4.17	-27.04	-9999	-26.54	0.4994	124.172	8.15898	-9999
2000	331	54300	54900	54600	71.3007	4.47	-26.78	-9999	-26.4	0.3796	117.412	6.26266	-9999
2000	331	54900	55500	55200	63.9	4.88	-26.69	-9999	-26.35	0.3397	109.948	6.08049	-9999
2000	331	55500	56100	55800	63.7	5.06	-26.79	-9999	-26.53	0.2595	110.868	6.7734	-9999
2000	331	56100	56700	56400	63.2	4.84	-26.84	-9999	-26.62	0.2186	116.24	6.25829	-9999
2000	331	56700	57300	57000	66.4	4.54	-26.97	-9999	-26.77	0.19899	115.199	6.2737	-9999
2000	331	57300	57900	57600	65.7	4.64	-26.86	-9999	-26.53	0.3293	113.302	6.2225	-9999
2000	331	57900	58500	58200	63.4	4.84	-26.66	-9999	-26.35	0.3097	111.186	6.15161	-9999
2000	331	58500	59100	58800	63.8	4.67	-26.95	-9999	-26.67	0.2794	106.814	6.06534	-9999
2000	331	59100	59700	59400	58.7	4.83	-27.19	-9999	-26.5	0.6891	109.485	6.59103	-9999
2000	331	59700	60300	60000	55.9001	4.75	-27.04	-9999	-26.44	0.5997	113.251	6.41075	-9999
2000	331	60300	60900	60600	57.3	4.67	-26.8	-9999	-26.24	0.56	111.274	6.12256	-9999
2000	331	60900	61500	61200	57.5	4.63	-26.67	-9999	-26.18	0.4896	112.831	6.70008	-9999
2000	331	61500	62100	61800	60.5999	4.38	-26.52	-9999	-26.28	0.2393	109.322	6.10398	-9999
2000	331	62100	62700	62400	60.8	4.05	-26.36	-9999	-26.14	0.2191	108.898	6.02929	-9999
2000	331	62700	63300	63000	59.2	4.24	-26.15	-9999	-25.89	0.2599	108.924	6.97044	-9999
2000	331	63300	63900	63600	57	4.55	-25.91	-9999	-25.68	0.2287	105.583	6.70857	-9999
2000	331	63900	64500	64200	55.3001	4.78	-25.72	-9999	-25.56	0.15981	103.727	6.31084	-9999
2000	331	64500	65100	64800	54	4.71	-25.61	-9999	-25.62	-0.00979	100.863	5.8366	-9999
2000	331	65100	65700	65400	55.1	4.91	-25.34	-9999	-25.35	-0.01	92.5808	6.13141	-9999
2000	331	65700	66300	66000	52.7999	5.06	-25.34	-9999	-25.26	0.07938	86.7779	5.89461	-9999
2000	331	66300	66900	66600	52.8001	4.87	-25.46	-9999	-25.3	0.15856	88.9487	5.75113	-9999
2000	331	66900	67500	67200	55.3001	4.42	-25.56	-9999	-25.4	0.16	93.7579	6.11396	-9999
2000	331	67500	68100	67800	55.1	4.47	-25.68	-9999	-25.57	0.10864	91.5925	7.36946	-9999
2000	331	68100	68700	68400	55.7	4.52	-25.76	-9999	-25.6	0.15856	-9999	-9999	-9999
2000	331	68700	69300	69000	60.5	4.38	-25.84	-9999	-25.73	0.10906	-9999	-9999	-9999
2000	331	69300	69900	69600	63.4	4.44	-25.98	-9999	-25.81	0.16888	102.349	9.48604	-9999
2000	331	69900	70500	70200	62.6	4.62	-26.08	-9999	-25.81	0.2699	104.362	6.58858	-9999
2000	331	70500	71100	70800	59.3999	4.88	-26.01	-9999	-25.86	0.1498	108.789	6.47713	-9999
2000	331	71100	71700	71400	58.1999	4.8	-26.02	-9999	-26	0.02	107.331	6.29823	-9999
2000	331	71700	72300	72000	59.6	4.31	-26.08	-9999	-25.98	0.1	107.851	5.83325	-9999
2000	331	72300	72900	72600	63.2	3.99	-26.2	-9999	-26.03	0.1689	106.325	5.97817	-9999
2000	331	72900	73500	73200	60.1	4.31	-26.45	-9999	-25.89	0.559	108.944	6.50593	-9999
2000	331	73500	74100	73800	58.2	4.54	-26.41	-9999	-25.67	0.7383	109.359	7.7855	-9999
2000	331	74100	74700	74400	60.7	4.72	-26.4	-9999	-25.67	0.7278	106.377	6.87987	-9999
2000	331	74700	75300	75000	60.1	4.65	-26.37	-9999	-25.81	0.5593	104.092	7.78589	-9999
2000	331	75300	75900	75600	59.4001	4.63	-26.59	-9999	-25.8	0.7899	106.711	7.11503	-9999
2000	331	75900	76500	76200	57.3	4.92	-26.7	-9999	-25.69	1.01	109.636	6.77931	-9999
2000	331	76500	77100	76800	56.9	5.07	-26.78	-9999	-25.69	1.09	108.204	6.98895	-9999
2000	331	77100	77700	77400	61.7	4.33	-26.92	-9999	-25.87	1.0498	108.506	6.48481	-9999
2000	331	77700	78300	78000	61.8	4.14	-27.02	-9999	-26.26	0.7591	110.209	6.78732	-9999
2000	331	78300	78900	78600	61.4	4.56	-27.2	-9999	-26.3	0.899	110.852	8.65421	-9999
2000	331	78900	79500	79200	57.6	4.5	-27.23	-9999	-26.36	0.8696	114.397	6.59134	-9999
2000	331	79500	80100	79800	60.2	4.02	-27.37	-9999	-26.6	0.7687	114.639	6.58101	-9999
2000	331	80100	80700	80400	60.4	4.13	-27.52	-9999	-26.66	0.8596	117.422	6.88387	-9999
2000	331	80700	81300	81000	57.2001	4.67	-27.54	-9999	-26.5	1.04	117.118	6.6007	-9999
2000	331	81300	81900	81600	54.7	4.57	-27.6	-9999	-26.52	1.08	116.154	6.69113	-9999
2000	331	81900	82500	82200	53.5	4.64	-27.58	-9999	-26.57	1.0098	113.82	6.5449	-9999
2000	331	82500	83100	82800	53.7	4.53	-27.6	-9999	-26.69	0.91	112.853	6.21471	-9999
2000	331	83100	83700	83400	53.2	4.34	-27.77	-9999	-26.93	0.84	112.099	9.34214	-9999
2000	331	83700	84300	84000	52.7	4.12	-27.89	-9999	-27	0.8891	115.836	6.7049	-9999
2000	331	84300	84900	84600	51	4	-27.95	-9999	-27.01	0.9393	116.03	7.21162	-9999
2000	331	84900	85500	85200	53.1	3.95	-28.07	-9999	-26.88	1.19	118.324	7.81136	-9999
2000	331	85500	86100	85800	54.8996	4.12	-28.18	-9999	-26.85	1.33	121.6	7.73966	-9999
2000	331	86100	86700	86400	58.2	3.87	-28.2	-9999	-26.97	1.23	122.742	7.19489	-9999
2000	332	300	900	600	58.9	3.71	-28.22	-9999	-27.11	1.11	124.828	7.22098	-9999
2000	332	900	1500	1200	59.8	4.25	-28.25	-9999	-27.12	1.13	125.164	7.21335	-9999
2000	332	1500	2100	1800	60.7	4.1	-28.37	-9999	-27.12	1.25	124.133	9.18024	-9999
2000	332	2100	2700	2400	62.7998	3.69	-28.4	-9999	-27.3	1.1	127.28	6.9191	-9999
2000	332	2700	3300	3000	69.1	3.52	-28.47	-9999	-27.47	1	131.535	7.7418	-9999
2000	332	3300	3900	3600	62.8002	3.85	-28.52	-9999	-27.3	1.22	131.48	7.40279	-9999
2000	332	3900	4500	4200	56.1	3.84	-28.42	-9999	-27.3	1.1199	131.114	7.0573	-9999
2000	332	4500	5100	4800	57.4	3.51	-28.41	-9999	-27.34	1.07	129.468	7.2648	-9999
2000	332	5100	5700	5400	61.5999	3.11	-28.57	-9999	-27.51	1.06	131.765	7.79089	-9999
2000	332	5700	6300	6000	74.3032	2.12	-28.6	-9999	-27.89	0.71	134.977	11.8353	-9999
2000	332	6300	6900	6600	76.1999	2.32	-28.78	-9999	-28.12	0.6597	145.182	12.3783	-9999
2000	332	6900	7500	7200	66.3993	2.55	-28.86	-9999	-27.8	1.06	140.866	13.7447	-9999
2000	332	7500	8100	7800	59.9998	3.12	-28.9	-9999	-27.61	1.29	144.327	12.8125	-9999
2000	332	8100	8700	8400	61	3.21	-28.98	-9999	-27.68	1.3	151.435	11.5567	-9999
2000	332	8700	9300	9000	61.4	3.37	-29	-9999	-27.59	1.41	152.542	9.23227	-9999
2000	332	9300	9900	9600	56.9	3.3	-28.97	-9999	-27.61	1.36	150.856	8.87027	-9999
2000	332	9900	10500	10200	58.4001	3.09	-29.02	-9999	-27.74	1.28	148.982	9.95013	-9999
2000	332	10500	11100	10800	54.8994	2.9	-29.15	-9999	-27.93	1.22	154.867	16.9382	-9999
2000	332	11100	11700	11400	54.7002	2.73	-29.26	-9999	-27.96	1.3	164.942	11.1917	-9999
2000	332	11700	12300	12000	53.6999	3.38	-29.37	-9999	-27.91	1.46	166.19	11.5541	-9999
2000	332	12300	12900	12600	54.7999	3.17	-29.36	-9999	-28.07	1.29	162.381	9.41189	-9999
2000	332	12900	13500	13200	52.8999	3.24	-29.39	-9999	-28.18	1.21	166.366	11.0228	-9999
2000	332	13500	14100	13800	46.5	3.3	-29.28	-9999	-28.2	1.08	157.372	9.62678	-9999
2000	332	14100	14700	14400	47.0998	3.33	-29.23	-9999	-28.24	0.9899	150.232	8.66824	-9999
2000	332	14700	15300	15000	47.9998	3.25	-29.31	-9999	-28.36	0.95	150.387	8.72136	-9999
2000	332	15300	15900	15600	47.9997	2.76	-29.4	-9999	-28.45	0.9493	153.072	14.5048	-9999
2000	332	15900	16500	16200	42.4996	2.72	-29.4	-9999	-28.66	0.7382	154.654	9.24695	-9999
2000	332	16500	17100	16800	40.6	3.47	-29.42	-9999	-28.5	0.9185	153.272	9.49252	-9999
2000	332	17100	17700	17400	39.3001	3.63	-29.36	-9999	-28.48	0.8791	147.275	8.23431	-9999
2000	332	17700	18300	18000	38.9	3.29	-29.38	-9999	-28.61	0.7676	145.876	8.11014	-9999
2000	332	18300	18900	18600	37.5	3.5	-29.45	-9999	-28.68	0.7693	150.153	8.76561	-9999
2000	332	18900	19500	19200	41.9	3.44	-29.58	-9999	-28.69	0.8899	155.152	8.97114	-9999
2000	332	19500	20100	19800	44.2002	3.36	-29.7	-9999	-28.88	0.8198	159.607	16.2263	-9999
2000	332	20100	20700	20400	40.4001	3.49	-29.7	-9999	-28.82	0.8794	161.532	8.17427	-9999
2000	332	20700	21300	21000	38.9998	3.34	-29.7	-9999	-28.9	0.8	157.011	8.36257	-9999
2000	332	21300	21900	21600	38.2	3.41	-29.74	-9999	-29	0.7394	154.354	8.37335	-9999
2000	332	21900	22500	22200	37.5995	3.4	-29.7	-9999	-29.12	0.579	147.177	8.81782	-9999
2000	332	22500	23100	22800	35.6999	3.58	-29.77	-9999	-29.38	0.3898	146.183	8.17056	-9999
2000	332	23100	23700	23400	32	3.51	-29.78	-9999	-29.37	0.41	136.66	7.31133	-9999
2000	332	23700	24300	24000	32.3003	3.84	-29.8	-9999	-29.43	0.37	135.061	7.21919	-9999
2000	332	24300	24900	24600	26.5996	3.82	-29.83	-9999	-29.4	0.4298	131.285	11.0972	-9999
2000	332	24900	25500	25200	25.0998	4.07	-29.9	-9999	-29.56	0.3377	129.194	6.70564	-9999
2000	332	25500	26100	25800	20.4	3.9	-29.9	-9999	-29.59	0.3072	121.502	6.46322	-9999
2000	332	26100	26700	26400	21.5	3.92	-29.93	-9999	-29.59	0.3378	120.349	7.15155	-9999
2000	332	26700	27300	27000	20.5001	3.89	-30	-9999	-29.59	0.4091	-9999	-9999	-9999
2000	332	27300	27900	27600	18.5	3.88	-30.09	-9999	-29.79	0.2999	-9999	-9999	-9999
2000	332	27900	28500	28200	15.4002	3.68	-30.09	-9999	-29.83	0.2598	-9999	-9999	-9999
2000	332	28500	29100	28800	17.3	3.76	-30.14	-9999	-29.88	0.2599	-9999	-9999	-9999
2000	332	29100	29700	29400	16.2001	4.02	-30.21	-9999	-29.9	0.31	-9999	-9999	-9999
2000	332	29700	30300	30000	14.4009	4.03	-30.29	-9999	-29.91	0.38	-9999	-9999	-9999
2000	332	30300	30900	30600	17.0001	4.23	-30.3	-9999	-29.9	0.4	-9999	-9999	-9999
2000	332	30900	31500	31200	16.1001	4.1	-30.37	-9999	-29.99	0.3793	122.972	7.34776	-9999
2000	332	31500	32100	31800	15.3999	3.96	-30.4	-9999	-30.15	0.248	127.936	6.01758	-9999
2000	332	32100	32700	32400	11.8008	4.11	-30.4	-9999	-30.15	0.248	-9999	-9999	-9999
2000	332	32700	33300	33000	9.9002	3.83	-30.47	-9999	-30.09	0.3786	-9999	-9999	-9999
2000	332	33300	33900	33600	12.2	4.11	-30.51	-9999	-30	0.51	-9999	-9999	-9999
2000	332	33900	34500	34200	18.2003	4.09	-30.5	-9999	-29.92	0.58	-9999	-9999	-9999
2000	332	34500	35100	34800	13.3024	4.08	-30.52	-9999	-30.1	0.4198	-9999	-9999	-9999
2000	332	35100	35700	35400	7.39999	3.98	-30.6	-9999	-30.31	0.29	-9999	-9999	-9999
2000	332	35700	36300	36000	0.699882	3.82	-30.69	-9999	-30.35	0.3397	-9999	-9999	-9999
2000	332	36300	36900	36600	6.70015	3.91	-30.69	-9999	-30.3	0.3893	-9999	-9999	-9999
2000	332	36900	37500	37200	11.9001	3.79	-30.64	-9999	-30.22	0.4199	-9999	-9999	-9999
2000	332	37500	38100	37800	13.0998	3.73	-30.67	-9999	-30.17	0.4993	113.448	10.9782	-9999
2000	332	38100	38700	38400	14.0992	3.96	-30.68	-9999	-30.2	0.4795	114.32	8.22367	-9999
2000	332	38700	39300	39000	7.20034	4.01	-30.7	-9999	-30.28	0.4194	117.059	54.3204	-9999
2000	332	39300	39900	39600	14.8012	3.77	-30.62	-9999	-30.16	0.4598	110.327	7.06397	-9999
2000	332	39900	40500	40200	13.6	3.95	-30.63	-9999	-30.17	0.46	109.16	6.47061	-9999
2000	332	40500	41100	40800	15.6021	4.16	-30.68	-9999	-30.22	0.4598	108.283	6.63306	-9999
2000	332	41100	41700	41400	7.39764	4.42	-30.78	-9999	-30.56	0.21939	107.693	6.66887	-9999
2000	332	41700	42300	42000	8.70024	4.29	-30.8	-9999	-30.63	0.1693	108.318	8.95376	-9999
2000	332	42300	42900	42600	10.0999	4.06	-30.85	-9999	-30.66	0.1891	109.626	6.54266	-9999
2000	332	42900	43500	43200	13.8993	4.09	-30.89	-9999	-30.6	0.2872	109.738	6.60706	-9999
2000	332	43500	44100	43800	23.8994	3.87	-30.9	-9999	-30.59	0.3072	109.765	6.42629	-9999
2000	332	44100	44700	44400	30.3033	3.8	-30.92	-9999	-30.57	0.348	107.928	6.93249	-9999
2000	332	44700	45300	45000	17.8026	3.56	-30.9	-9999	-30.53	0.3681	106.573	6.62665	-9999
2000	332	45300	45900	45600	19	3.43	-30.84	-9999	-30.47	0.3699	107.051	6.58975	-9999
2000	332	45900	46500	46200	17.1996	3.24	-30.83	-9999	-30.47	0.36	107.841	7.40702	-9999
2000	332	46500	47100	46800	19.1	3.32	-30.86	-9999	-30.41	0.45	107.789	8.20502	-9999
2000	332	47100	47700	47400	17.4994	3.58	-30.82	-9999	-30.61	0.2087	109.634	6.40138	-9999
2000	332	47700	48300	48000	16.4006	3.54	-30.8	-9999	-30.53	0.2697	107.854	6.61514	-9999
2000	332	48300	48900	48600	15.6999	3.76	-30.98	-9999	-30.56	0.4189	107.905	6.3646	-9999
2000	332	48900	49500	49200	17.1998	3.62	-30.95	-9999	-30.4	0.55	115.378	6.70094	-9999
2000	332	49500	50100	49800	18.4001	3.62	-30.73	-9999	-30.43	0.29969	114.448	8.42422	-9999
2000	332	50100	50700	50400	18.7	3.71	-30.72	-9999	-30.56	0.15888	112.146	6.46428	-9999
2000	332	50700	51300	51000	17.6	3.71	-30.75	-9999	-30.56	0.18889	137.203	69.6616	-9999
2000	332	51300	51900	51600	16.8	3.61	-30.8	-9999	-30.6	0.199	114.403	9.43854	-9999
2000	332	51900	52500	52200	14.4	3.78	-30.8	-9999	-30.52	0.2798	116.118	6.60575	-9999
2000	332	52500	53100	52800	14.9	3.53	-30.73	-9999	-30.39	0.3398	113.524	6.58379	-9999
2000	332	53100	53700	53400	13.8999	3.46	-30.71	-9999	-30.47	0.2394	114.507	6.95866	-9999
2000	332	53700	54300	54000	10.4998	3.62	-30.63	-9999	-30.49	0.1397	113.753	6.29764	-9999
2000	332	54300	54900	54600	9.70003	3.83	-30.6	-9999	-30.5	0.1	111.629	5.87727	-9999
2000	332	54900	55500	55200	9.20001	3.61	-30.6	-9999	-30.5	0.1	113.219	6.80816	-9999
2000	332	55500	56100	55800	11.2001	3.51	-30.63	-9999	-30.63	0	119.268	8.10999	-9999
2000	332	56100	56700	56400	16.0999	3.59	-30.6	-9999	-30.45	0.15	122.64	6.27271	-9999
2000	332	56700	57300	57000	17.6001	3.4	-30.58	-9999	-30.31	0.2698	123.496	6.42706	-9999
2000	332	57300	57900	57600	17.4	3.35	-30.5	-9999	-30.25	0.2495	126.019	7.2041	-9999
2000	332	57900	58500	58200	18.3	3.21	-30.45	-9999	-30.26	0.18887	123.182	6.76334	-9999
2000	332	58500	59100	58800	19.7001	3.16	-30.41	-9999	-30.18	0.2287	121.101	6.66224	-9999
2000	332	59100	59700	59400	18.7001	3.45	-30.4	-9999	-29.97	0.4291	124.209	7.52677	-9999
2000	332	59700	60300	60000	20.4002	2.94	-30.4	-9999	-29.85	0.549	125.105	7.67915	-9999
2000	332	60300	60900	60600	20.3	2.55	-30.4	-9999	-29.82	0.5784	126.39	14.9437	-9999
2000	332	60900	61500	61200	28.9989	2.13	-30.49	-9999	-30.02	0.4696	139.321	8.97462	-9999
2000	332	61500	62100	61800	52.4004	1.73	-30.65	-9999	-30.11	0.54	149.66	10.7987	-9999
2000	332	62100	62700	62400	64.9063	1.72	-31.12	-9999	-30.39	0.7294	190.463	30.1467	-9999
2000	332	62700	63300	63000	58.2985	1.93	-31.47	-9999	-30.5	0.9697	238.895	12.2662	-9999
2000	332	63300	63900	63600	54.2952	2.52	-31.52	-9999	-30.5	1.0194	228.718	19.7091	-9999
2000	332	63900	64500	64200	61.1	2.28	-31.59	-9999	-30.76	0.8299	243.249	10.9773	-9999
2000	332	64500	65100	64800	55.4003	2.41	-31.6	-9999	-30.7	0.9	238.385	10.867	-9999
2000	332	65100	65700	65400	49.3	2.56	-31.5	-9999	-30.54	0.9596	229.039	27.827	-9999
2000	332	65700	66300	66000	42.8997	2.6	-31.29	-9999	-30.36	0.9295	221.878	16.0249	-9999
2000	332	66300	66900	66600	42.9001	2.41	-31.32	-9999	-30.33	0.99	214.303	13.987	-9999
2000	332	66900	67500	67200	37.7	2.44	-31.32	-9999	-30.28	1.04	210.453	16.6134	-9999
2000	332	67500	68100	67800	38.6	2.72	-31.15	-9999	-30.17	0.9798	200.496	18.2484	-9999
2000	332	68100	68700	68400	34.1997	3.14	-30.71	-9999	-30	0.709	160.683	15.8481	-9999
2000	332	68700	69300	69000	37.4	3.16	-30.44	-9999	-29.89	0.5492	143.792	8.03131	-9999
2000	332	69300	69900	69600	41.6	3.02	-30.4	-9999	-29.75	0.6485	140.978	9.97254	-9999
2000	332	69900	70500	70200	40.4001	2.76	-30.45	-9999	-29.83	0.6189	146.624	11.9996	-9999
2000	332	70500	71100	70800	45.4001	2.38	-30.63	-9999	-29.81	0.8194	157.454	9.33879	-9999
2000	332	71100	71700	71400	56.498	1.98	-30.74	-9999	-29.86	0.8799	171.282	18.5397	-9999
2000	332	71700	72300	72000	58.4001	2.22	-31.23	-9999	-29.94	1.29	207.533	15.5688	-9999
2000	332	72300	72900	72600	57.5999	2.19	-31.4	-9999	-30	1.4	214.663	9.78643	-9999
2000	332	72900	73500	73200	54.9999	1.74	-31.44	-9999	-29.86	1.58	216.147	11.1688	-9999
2000	332	73500	74100	73800	59.0993	1.68	-31.34	-9999	-29.78	1.56	204.228	13.4735	-9999
2000	332	74100	74700	74400	57.7005	1.72	-31.32	-9999	-29.56	1.76	197.173	27.0567	-9999
2000	332	74700	75300	75000	64.9003	1.91	-31.24	-9999	-29.36	1.88	207.31	17.0264	-9999
2000	332	75300	75900	75600	64.504	2.15	-31.2	-9999	-29.33	1.87	204.879	11.7423	-9999
2000	332	75900	76500	76200	54.6981	2.18	-31.14	-9999	-29.29	1.85	203.223	13.3242	-9999
2000	332	76500	77100	76800	66.4009	2.12	-31.3	-9999	-29.7	1.6	227.629	14.0823	-9999
2000	332	77100	77700	77400	69.1997	2.41	-31.19	-9999	-29.76	1.43	219.809	11.6182	-9999
2000	332	77700	78300	78000	72.1995	2.7	-31.07	-9999	-29.7	1.37	211.468	10.3677	-9999
2000	332	78300	78900	78600	72.8	2.67	-31.02	-9999	-29.95	1.0699	204.542	9.66167	-9999
2000	332	78900	79500	79200	70.4999	2.82	-30.94	-9999	-30.15	0.7888	197.536	19.0083	-9999
2000	332	79500	80100	79800	67.0002	3.15	-30.89	-9999	-30.16	0.7287	195.628	8.97059	-9999
2000	332	80100	80700	80400	64.7001	3.28	-30.76	-9999	-29.81	0.9497	179.224	8.83231	-9999
2000	332	80700	81300	81000	61.2	3.02	-30.7	-9999	-29.77	0.9293	176.018	8.25793	-9999
2000	332	81300	81900	81600	50.4964	3.12	-30.68	-9999	-29.9	0.7796	179.712	8.17303	-9999
2000	332	81900	82500	82200	53.5013	2.65	-30.67	-9999	-29.92	0.7493	186.182	9.03274	-9999
2000	332	82500	83100	82800	63.8022	2.76	-30.76	-9999	-29.64	1.1199	191.222	7.90352	-9999
2000	332	83100	83700	83400	69.8999	2.91	-30.8	-9999	-29.66	1.14	189.085	8.43381	-9999
2000	332	83700	84300	84000	68.2001	3.19	-30.8	-9999	-29.86	0.9399	186.921	18.8462	-9999
2000	332	84300	84900	84600	57.8999	3.4	-30.79	-9999	-29.78	1.01	192.8	8.59513	-9999
2000	332	84900	85500	85200	54.8999	3.22	-30.75	-9999	-29.91	0.8396	190.296	7.88211	-9999
2000	332	85500	86100	85800	57.8	3.25	-30.74	-9999	-29.68	1.0599	185.392	7.69673	-9999
2000	332	86100	86700	86400	63.5994	3.08	-30.64	-9999	-29.63	1.0097	185.846	8.27098	-9999
2000	333	300	900	600	67.9	2.89	-30.6	-9999	-29.74	0.86	183.106	7.8601	-9999
2000	333	900	1500	1200	70.6	2.76	-30.6	-9999	-29.85	0.75	181.42	8.1614	-9999
2000	333	1500	2100	1800	66.1	3.06	-30.6	-9999	-29.79	0.81	179.223	14.114	-9999
2000	333	2100	2700	2400	62.7001	2.83	-30.49	-9999	-29.88	0.6096	178.142	7.66192	-9999
2000	333	2700	3300	3000	51.4997	3.22	-30.26	-9999	-29.68	0.5791	170.882	8.69959	-9999
2000	333	3300	3900	3600	48.2	3.44	-30.06	-9999	-29.52	0.54	164.979	7.39919	-9999
2000	333	3900	4500	4200	46.4	3.43	-30.02	-9999	-29.37	0.6499	159.674	7.06314	-9999
2000	333	4500	5100	4800	44.9998	3.42	-29.9	-9999	-29.18	0.7188	156.878	7.15636	-9999
2000	333	5100	5700	5400	51.0999	3.38	-29.85	-9999	-29.27	0.5793	156.578	7.24799	-9999
2000	333	5700	6300	6000	47.9001	3.36	-29.76	-9999	-29.17	0.5897	151.637	7.58815	-9999
2000	333	6300	6900	6600	43.0999	3.19	-29.64	-9999	-28.97	0.6693	146.486	12.8975	-9999
2000	333	6900	7500	7200	40.8	3.18	-29.68	-9999	-28.58	1.0999	148.122	7.91007	-9999
2000	333	7500	8100	7800	42.2	3.22	-29.52	-9999	-28.3	1.22	137.039	21.2198	-9999
2000	333	8100	8700	8400	36.4999	3.25	-29.2	-9999	-28.21	0.99	129.354	8.27141	-9999
2000	333	8700	9300	9000	35.9	3.39	-29.02	-9999	-28.02	1	125.1	6.80328	-9999
2000	333	9300	9900	9600	37.9995	3.44	-29.01	-9999	-28.17	0.8398	127.345	7.11083	-9999
2000	333	9900	10500	10200	46	3.17	-29.11	-9999	-28.47	0.6399	133.01	7.35205	-9999
2000	333	10500	11100	10800	45.9	3.15	-29.25	-9999	-28.64	0.6098	139.3	7.06851	-9999
2000	333	11100	11700	11400	48.6004	2.92	-29.42	-9999	-28.83	0.5891	150.692	13.4126	-9999
2000	333	11700	12300	12000	43.5999	3.15	-29.34	-9999	-28.66	0.6792	143.083	9.21804	-9999
2000	333	12300	12900	12600	60.6094	2.41	-29.45	-9999	-28.68	0.7692	149.338	13.2002	-9999
2000	333	12900	13500	13200	63.3999	2.36	-29.66	-9999	-28.61	1.05	172.082	11.8426	-9999
2000	333	13500	14100	13800	70.7006	2.26	-29.87	-9999	-28.64	1.23	188.526	11.3191	-9999
2000	333	14100	14700	14400	75.2023	2.53	-30	-9999	-29.04	0.9596	198.52	9.52444	-9999
2000	333	14700	15300	15000	65.5001	2.58	-29.93	-9999	-29.25	0.6793	186.755	9.7509	-9999
2000	333	15300	15900	15600	59.6978	2.8	-29.78	-9999	-29.13	0.6496	174.101	14.7352	-9999
2000	333	15900	16500	16200	58.2	2.83	-29.67	-9999	-29.14	0.5294	170.404	7.66212	-9999
2000	333	16500	17100	16800	58.0995	3.05	-29.6	-9999	-29.03	0.57	162.526	7.95114	-9999
2000	333	17100	17700	17400	64.3999	3.35	-29.6	-9999	-28.9	0.7	158.438	7.41367	-9999
2000	333	17700	18300	18000	66.9	3.34	-29.6	-9999	-28.99	0.61	160.195	7.41084	-9999
2000	333	18300	18900	18600	69.2002	3.38	-29.62	-9999	-29.13	0.49	164.577	7.15707	-9999
2000	333	18900	19500	19200	65.9997	3.25	-29.63	-9999	-28.95	0.6796	169.095	7.44192	-9999
2000	333	19500	20100	19800	61.7	3.38	-29.55	-9999	-28.72	0.83	164.411	8.06898	-9999
2000	333	20100	20700	20400	58.6	3.48	-29.38	-9999	-28.37	1.0099	153.935	13.5745	-9999
2000	333	20700	21300	21000	61.0998	3.59	-29.35	-9999	-28.45	0.8995	149.987	6.91626	-9999
2000	333	21300	21900	21600	60	3.56	-29.26	-9999	-28.41	0.85	146.624	7.81804	-9999
2000	333	21900	22500	22200	64.6003	3.37	-29.33	-9999	-28.67	0.659	150.741	7.67338	-9999
2000	333	22500	23100	22800	67.4	3.42	-29.4	-9999	-28.74	0.6586	156.162	7.94858	-9999
2000	333	23100	23700	23400	69.4	3.5	-29.4	-9999	-28.74	0.6586	157.157	7.52567	-9999
2000	333	23700	24300	24000	67.8998	3.6	-29.38	-9999	-28.71	0.6684	157.565	7.9272	-9999
2000	333	24300	24900	24600	65.5999	3.68	-29.31	-9999	-28.64	0.6693	152.023	7.52371	-9999
2000	333	24900	25500	25200	67.8	3.64	-29.33	-9999	-28.59	0.7385	148.596	10.3209	-9999
2000	333	25500	26100	25800	67	3.78	-29.4	-9999	-28.55	0.8479	155.45	6.85293	-9999
2000	333	26100	26700	26400	67	3.73	-29.31	-9999	-28.5	0.8096	153.247	7.43015	-9999
2000	333	26700	27300	27000	65.7002	3.96	-29.25	-9999	-28.42	0.8299	149.047	7.92957	-9999
2000	333	27300	27900	27600	60.4	3.96	-29.04	-9999	-28.34	0.6998	141.237	7.45846	-9999
2000	333	27900	28500	28200	61.3	3.87	-28.99	-9999	-28.35	0.6395	136.385	6.9248	-9999
2000	333	28500	29100	28800	61.2	3.98	-29	-9999	-28.41	0.5897	136.095	6.9104	-9999
2000	333	29100	29700	29400	62.1003	4.15	-28.96	-9999	-28.4	0.56	133.787	7.47178	-9999
2000	333	29700	30300	30000	63.8	4.16	-29	-9999	-28.38	0.6198	136.677	7.78813	-9999
2000	333	30300	30900	30600	57.7997	4.08	-28.87	-9999	-28.23	0.6388	137.789	8.05399	-9999
2000	333	30900	31500	31200	54.9	4.21	-28.75	-9999	-28.17	0.5797	132.318	7.13379	-9999
2000	333	31500	32100	31800	55.6	4.25	-28.74	-9999	-28.15	0.5892	131.346	6.82914	-9999
2000	333	32100	32700	32400	60.4001	4.3	-28.8	-9999	-28.24	0.56	130.83	6.45934	-9999
2000	333	32700	33300	33000	57.9	4.2	-28.71	-9999	-28.21	0.4996	128.197	6.82087	-9999
2000	333	33300	33900	33600	57.7	4.24	-28.71	-9999	-28.3	0.4097	123.14	7.17452	-9999
2000	333	33900	34500	34200	56.5	4.23	-28.61	-9999	-28.18	0.4299	-9999	-9999	-9999
2000	333	34500	35100	34800	57.1	4.31	-28.57	-9999	-28.17	0.3997	-9999	-9999	-9999
2000	333	35100	35700	35400	57.2	4.23	-28.6	-9999	-28.17	0.43	-9999	-9999	-9999
2000	333	35700	36300	36000	58.5	4.19	-28.62	-9999	-28.1	0.5196	-9999	-9999	-9999
2000	333	36300	36900	36600	58.4	4.24	-28.6	-9999	-28.19	0.41	-9999	-9999	-9999
2000	333	36900	37500	37200	57.2	4.12	-28.63	-9999	-28.27	0.3598	-9999	-9999	-9999
2000	333	37500	38100	37800	52.9999	4.3	-28.5	-9999	-28.2	0.2999	-9999	-9999	-9999
2000	333	38100	38700	38400	50.5	4.35	-28.45	-9999	-28.13	0.3183	-9999	-9999	-9999
2000	333	38700	39300	39000	50.9	4.3	-28.4	-9999	-28.07	0.328	-9999	-9999	-9999
2000	333	39300	39900	39600	50.2	4	-28.36	-9999	-28.07	0.2889	-9999	-9999	-9999
2000	333	39900	40500	40200	51.3	3.9	-28.44	-9999	-28.31	0.12865	-9999	-9999	-9999
2000	333	40500	41100	40800	53.5	3.63	-28.59	-9999	-28.32	0.2697	-9999	-9999	-9999
2000	333	41100	41700	41400	53.4	3.49	-28.65	-9999	-28.32	0.3295	-9999	-9999	-9999
2000	333	41700	42300	42000	55.6	3.5	-28.7	-9999	-28.33	0.3696	-9999	-9999	-9999
2000	333	42300	42900	42600	59.9001	3.65	-28.83	-9999	-28.32	0.5098	-9999	-9999	-9999
2000	333	42900	43500	43200	63.3003	3.62	-28.99	-9999	-28.45	0.5399	-9999	-9999	-9999
2000	333	43500	44100	43800	59.4	3.56	-29.08	-9999	-28.59	0.4898	-9999	-9999	-9999
2000	333	44100	44700	44400	61.1	3.65	-29.1	-9999	-28.5	0.6	-9999	-9999	-9999
2000	333	44700	45300	45000	63.1	3.85	-29.1	-9999	-28.45	0.65	-9999	-9999	-9999
2000	333	45300	45900	45600	65.1	3.97	-29.03	-9999	-28.4	0.63	-9999	-9999	-9999
2000	333	45900	46500	46200	63.6	3.75	-29.1	-9999	-28.38	0.72	-9999	-9999	-9999
2000	333	46500	47100	46800	59.5999	3.76	-29.06	-9999	-28.26	0.7998	-9999	-9999	-9999
2000	333	47100	47700	47400	59	3.84	-29.04	-9999	-28.29	0.7496	-9999	-9999	-9999
2000	333	47700	48300	48000	60.8	3.97	-29.03	-9999	-28.24	0.7897	-9999	-9999	-9999
2000	333	48300	48900	48600	60	4.06	-29	-9999	-28.23	0.7696	-9999	-9999	-9999
2000	333	48900	49500	49200	59.5	3.89	-28.92	-9999	-28.3	0.6182	-9999	-9999	-9999
2000	333	49500	50100	49800	58.5	3.61	-28.94	-9999	-28.27	0.6687	-9999	-9999	-9999
2000	333	50100	50700	50400	56.4	3.6	-28.9	-9999	-28.2	0.6987	-9999	-9999	-9999
2000	333	50700	51300	51000	56.9999	3.72	-28.84	-9999	-28.18	0.6594	-9999	-9999	-9999
2000	333	51300	51900	51600	58.4	3.73	-28.83	-9999	-28.13	0.6987	-9999	-9999	-9999
2000	333	51900	52500	52200	52.7	3.82	-28.62	-9999	-28.01	0.6095	-9999	-9999	-9999
2000	333	52500	53100	52800	49.4	4.05	-28.43	-9999	-27.84	0.5895	-9999	-9999	-9999
2000	333	53100	53700	53400	44.2999	4.42	-28.15	-9999	-27.73	0.4199	-9999	-9999	-9999
2000	333	53700	54300	54000	43.6001	4.64	-28	-9999	-27.72	0.2798	-9999	-9999	-9999
2000	333	54300	54900	54600	38.6001	5	-27.87	-9999	-27.56	0.3086	-9999	-9999	-9999
2000	333	54900	55500	55200	35.1	5.03	-27.77	-9999	-27.44	0.33	-9999	-9999	-9999
2000	333	55500	56100	55800	31.6	5.23	-27.7	-9999	-27.32	0.3796	-9999	-9999	-9999
2000	333	56100	56700	56400	31.8	5.45	-27.63	-9999	-27.3	0.3298	-9999	-9999	-9999
2000	333	56700	57300	57000	33.5	5.57	-27.67	-9999	-27.33	0.3397	-9999	-9999	-9999
2000	333	57300	57900	57600	35.2999	5.82	-27.65	-9999	-27.23	0.4198	-9999	-9999	-9999
2000	333	57900	58500	58200	37.1	5.42	-27.72	-9999	-27.37	0.3497	-9999	-9999	-9999
2000	333	58500	59100	58800	36.5	5.45	-27.77	-9999	-27.4	0.3699	-9999	-9999	-9999
2000	333	59100	59700	59400	32.5999	5.29	-27.74	-9999	-27.5	0.23929	-9999	-9999	-9999
2000	333	59700	60300	60000	32.4	5.32	-27.56	-9999	-27.3	0.2598	-9999	-9999	-9999
2000	333	60300	60900	60600	33.7	5.31	-27.47	-9999	-27.26	0.2091	-9999	-9999	-9999
2000	333	60900	61500	61200	34.2003	5.25	-27.53	-9999	-27.27	0.2596	-9999	-9999	-9999
2000	333	61500	62100	61800	31.9	5.11	-27.5	-9999	-27.3	0.1998	-9999	-9999	-9999
2000	333	62100	62700	62400	33.7	4.93	-27.49	-9999	-27.33	0.15919	-9999	-9999	-9999
2000	333	62700	63300	63000	37.7	4.86	-27.5	-9999	-27.29	0.2091	-9999	-9999	-9999
2000	333	63300	63900	63600	43.0003	4.55	-27.56	-9999	-27.38	0.17969	-9999	-9999	-9999
2000	333	63900	64500	64200	47.5001	4.53	-27.73	-9999	-27.46	0.2697	-9999	-9999	-9999
2000	333	64500	65100	64800	49.8001	4.15	-27.87	-9999	-27.69	0.1792	-9999	-9999	-9999
2000	333	65100	65700	65400	45.8	4.38	-27.89	-9999	-27.64	0.248	-9999	-9999	-9999
2000	333	65700	66300	66000	48	4.32	-27.92	-9999	-27.63	0.2879	-9999	-9999	-9999
2000	333	66300	66900	66600	47.1	4.35	-27.92	-9999	-27.66	0.2586	-9999	-9999	-9999
2000	333	66900	67500	67200	47.9	4.38	-28.03	-9999	-27.6	0.4293	-9999	-9999	-9999
2000	333	67500	68100	67800	44	4.62	-27.97	-9999	-27.68	0.2894	-9999	-9999	-9999
2000	333	68100	68700	68400	43.1	4.71	-27.96	-9999	-27.68	0.2792	-9999	-9999	-9999
2000	333	68700	69300	69000	38.2	5.03	-27.9	-9999	-27.52	0.3794	-9999	-9999	-9999
2000	333	69300	69900	69600	34.5001	5.26	-27.67	-9999	-27.31	0.3598	-9999	-9999	-9999
2000	333	69900	70500	70200	31.8	5.46	-27.5	-9999	-27.13	0.3693	-9999	-9999	-9999
2000	333	70500	71100	70800	30.3	5.64	-27.38	-9999	-27.17	0.2087	-9999	-9999	-9999
2000	333	71100	71700	71400	28.7	5.86	-27.28	-9999	-27.07	0.2091	-9999	-9999	-9999
2000	333	71700	72300	72000	29.4	5.88	-27.29	-9999	-27.08	0.20849	-9999	-9999	-9999
2000	333	72300	72900	72600	31.2	5.69	-27.39	-9999	-27.18	0.2087	-9999	-9999	-9999
2000	333	72900	73500	73200	30.7	6.1	-27.42	-9999	-26.98	0.4393	-9999	-9999	-9999
2000	333	73500	74100	73800	33.6	5.56	-27.55	-9999	-27.15	0.3997	-9999	-9999	-9999
2000	333	74100	74700	74400	31.8	5.28	-27.49	-9999	-27.06	0.4295	-9999	-9999	-9999
2000	333	74700	75300	75000	31.4999	5.68	-27.32	-9999	-26.95	0.3698	-9999	-9999	-9999
2000	333	75300	75900	75600	29.3999	5.63	-27.4	-9999	-26.91	0.4893	-9999	-9999	-9999
2000	333	75900	76500	76200	30.1	5.74	-27.32	-9999	-26.95	0.3689	-9999	-9999	-9999
[truncated: 4,769 more rows]
