# Supplementary material for: The meteorology and chemistry of high nitrogen oxide concentrations in the stable boundary layer at the South Pole
Source: Copernicus journal article supplement (doi:10.5194/acp-18-3755-2018), 2018-03-14
Supplement: Supplementary file 7 [file ISCAT_Met_NO_merge_1998.xlsx]

## Sheet: Readme
Variable	unit	Definition	Missing data code
Year		Year of the field deployment
jday	day	Julian day of the sampling day
tst	sec.	Start of the 10 min. interval in GMT
tsp	sec.	End of the 10 min. interval in GMT
tmid	sec.	Mid point of the 10 min. interval in GMT	-9999
WD	deg.	Circular average of Wind direction (assumed untiy wind speed) measured at 10 m above surface	-9999
WS	m/s	Arithmetic average of wind speed measured at 10 m above surface	-9999
Temp_2	deg. C	Ambient Temperatue at 2 m above surface	-9999
Temp_10	deg. C	Ambient Temperatue at 10 m above surface	-9999
Temp_22	deg. C	Ambient Temperatue at 22 m above surface	-9999
delta_T	deg. C	Temperature difference between 22 m and 2 m	-9999
NO	pptv	Ambient NO mixing ration averaged in 10 min intervals	-9999
NO2	pptv	Ambient NO2 mixing ration averaged in 10 min intervals	-9999
NOy	pptv	Ambient NOy mixing ration averaged in 10 min intervals	-9999

## Sheet: data
Year	Jday	Tst	Tsp	Tmid	WD	WS	Temp_2	Temp_10	Temp_22	delta_T	NO	NO2	NOy
1998	334	86100	86700	86400	332.667	8.48889	-23.3778	-9999	-23.4111	-0.0333333	109.75	-9999	-9999
1998	335	300	900	600	334.3	8.16	-23.695	-9999	-23.64	0.055	120.667	-9999	-9999
1998	335	900	1500	1200	335.65	7.66	-24.17	-9999	-24.01	0.16	125.167	-9999	-9999
1998	335	1500	2100	1800	335.95	7.61	-24.35	-9999	-24.08	0.27	128.75	-9999	-9999
1998	335	2100	2700	2400	338.7	7.73	-24.295	-9999	-24.03	0.265	127.917	-9999	-9999
1998	335	2700	3300	3000	340.55	7.71	-24.36	-9999	-24.165	0.195	132.25	-9999	-9999
1998	335	3300	3900	3600	342.1	7.37	-24.54	-9999	-24.355	0.185	126.167	-9999	-9999
1998	335	3900	4500	4200	341.55	7.72	-24.53	-9999	-24.325	0.205	153.833	-9999	-9999
1998	335	4500	5100	4800	337.9	8.095	-24.495	-9999	-24.285	0.21	373.917	-9999	-9999
1998	335	5100	5700	5400	333.85	8.4	-24.545	-9999	-24.325	0.22	130.167	-9999	-9999
1998	335	5700	6300	6000	333.75	8.465	-24.7	-9999	-24.475	0.225	132.667	-9999	-9999
1998	335	7500	8100	7800	339.1	8.235	-24.765	-9999	-24.72	0.045	178	-9999	-9999
1998	335	14100	14700	14400	330.75	6.87	-25.745	-9999	-25.44	0.305	174.143	-9999	-9999
1998	335	14700	15300	15000	331.15	7.085	-25.535	-9999	-25.3	0.235	262.5	-9999	-9999
1998	335	15300	15900	15600	328.8	7.16	-25.32	-9999	-25.2	0.12	134	-9999	-9999
1998	335	15900	16500	16200	326.5	7.91	-25.065	-9999	-25.085	-0.02	123.667	-9999	-9999
1998	335	18300	18900	18600	328.65	7.79	-24.54	-9999	-24.255	0.285	156.333	-9999	-9999
1998	335	18900	19500	19200	328.4	7.875	-24.395	-9999	-24.21	0.185	139.167	-9999	-9999
1998	335	19500	20100	19800	327.55	7.695	-24.705	-9999	-24.5	0.205	133.5	-9999	-9999
1998	335	20100	20700	20400	329.1	7.665	-24.625	-9999	-24.31	0.315	138	-9999	-9999
1998	335	20700	21300	21000	329	7.57	-24.505	-9999	-24.385	0.12	134.083	-9999	-9999
1998	335	21300	21900	21600	329.95	7.42	-24.765	-9999	-24.62	0.145	141.333	-9999	-9999
1998	335	21900	22500	22200	331.7	7.25	-25.075	-9999	-24.69	0.385	157.917	-9999	-9999
1998	335	22500	23100	22800	332.05	6.995	-25.225	-9999	-24.75	0.475	163.75	-9999	-9999
1998	335	23100	23700	23400	331.15	7.16	-25.17	-9999	-24.775	0.395	162.167	-9999	-9999
1998	335	23700	24300	24000	328.35	7.425	-25.175	-9999	-24.84	0.335	159.333	-9999	-9999
1998	335	24300	24900	24600	328.7	7.215	-25.12	-9999	-24.85	0.27	165.25	-9999	-9999
1998	335	24900	25500	25200	329.25	6.905	-25.175	-9999	-24.965	0.21	169	-9999	-9999
1998	335	27900	28500	28200	327.55	5.97	-24.905	-9999	-24.76	0.145	172	-9999	-9999
1998	335	28500	29100	28800	329.05	6.02	-24.87	-9999	-24.93	-0.06	156.5	-9999	-9999
1998	335	29100	29700	29400	333	6.445	-25.155	-9999	-24.97	0.185	160.667	-9999	-9999
1998	335	29700	30300	30000	334.6	6.53	-25.405	-9999	-25.065	0.34	174.333	-9999	-9999
1998	335	30300	30900	30600	336.3	6.66	-25.51	-9999	-25.15	0.36	167.667	-9999	-9999
1998	335	30900	31500	31200	338.15	6.705	-25.525	-9999	-25.25	0.275	172.083	-9999	-9999
1998	335	31500	32100	31800	341.1	6.3	-25.705	-9999	-25.515	0.19	173.833	-9999	-9999
1998	335	32100	32700	32400	343.1	6.15	-25.615	-9999	-25.475	0.14	177.75	-9999	-9999
1998	335	32700	33300	33000	342.55	5.925	-25.455	-9999	-25.495	-0.04	178.583	-9999	-9999
1998	335	33300	33900	33600	342.95	5.93	-25.435	-9999	-25.465	-0.03	192.417	-9999	-9999
1998	335	33900	34500	34200	344.85	6.205	-25.415	-9999	-25.425	-0.01	192.667	-9999	-9999
1998	335	34500	35100	34800	344.7	6.98	-25.52	-9999	-25.43	0.09	187.917	-9999	-9999
1998	335	35100	35700	35400	345.2	6.935	-25.625	-9999	-25.33	0.295	205.5	-9999	-9999
1998	335	35700	36300	36000	343.6	6.855	-25.825	-9999	-25.5	0.325	216.833	-9999	-9999
1998	335	36300	36900	36600	342.95	6.875	-25.85	-9999	-25.42	0.43	209.75	-9999	-9999
1998	335	36900	37500	37200	343	6.525	-25.835	-9999	-25.435	0.4	212.167	-9999	-9999
1998	335	37500	38100	37800	342.9	6.62	-25.9	-9999	-25.575	0.325	206.75	-9999	-9999
1998	335	38100	38700	38400	342.1	6.465	-26.045	-9999	-25.61	0.435	201.083	-9999	-9999
1998	335	38700	39300	39000	341.15	6.415	-26.06	-9999	-25.73	0.33	200.75	-9999	-9999
1998	335	39300	39900	39600	340.85	6.61	-26	-9999	-25.75	0.25	197.667	-9999	-9999
1998	335	39900	40500	40200	339.25	6.485	-26.01	-9999	-25.69	0.32	191.583	-9999	-9999
1998	335	40500	41100	40800	337.6	6.67	-25.98	-9999	-25.585	0.395	188.167	-9999	-9999
1998	335	41100	41700	41400	336.75	7.04	-25.995	-9999	-25.485	0.51	172.917	-9999	-9999
1998	335	41700	42300	42000	337.25	7.095	-26.05	-9999	-25.43	0.62	173.25	-9999	-9999
1998	335	42300	42900	42600	338.95	6.53	-26.105	-9999	-25.625	0.48	174.75	-9999	-9999
1998	335	42900	43500	43200	343	6.19	-26.29	-9999	-25.82	0.47	180.417	-9999	-9999
1998	335	43500	44100	43800	346.3	5.87	-26.41	-9999	-25.845	0.565	197.25	-9999	-9999
1998	335	44100	44700	44400	346.9	5.59	-26.43	-9999	-25.92	0.51	202.583	-9999	-9999
1998	335	44700	45300	45000	347.75	5.69	-26.545	-9999	-25.89	0.655	208.333	-9999	-9999
1998	335	45300	45900	45600	345.9	6.085	-26.415	-9999	-25.785	0.63	205.222	-9999	-9999
1998	335	45900	46500	46200	344.2	6.46	-26.43	-9999	-25.675	0.755	210.167	-9999	-9999
1998	335	46500	47100	46800	346.1	6.35	-26.47	-9999	-25.72	0.75	199	-9999	-9999
1998	335	47100	47700	47400	343.25	6.705	-26.245	-9999	-25.565	0.68	204.417	-9999	-9999
1998	335	47700	48300	48000	345.9	6.23	-26.335	-9999	-25.655	0.68	206	-9999	-9999
1998	335	48300	48900	48600	346.5	6.395	-26.26	-9999	-25.75	0.51	200.667	-9999	-9999
1998	335	48900	49500	49200	348.55	6.29	-26.455	-9999	-25.785	0.67	209.25	-9999	-9999
1998	335	49500	50100	49800	348.9	6.21	-26.52	-9999	-25.81	0.71	209.083	-9999	-9999
1998	335	50100	50700	50400	348.9	6.425	-26.465	-9999	-25.775	0.69	197.333	-9999	-9999
1998	335	50700	51300	51000	346	7.075	-26.375	-9999	-25.605	0.77	195.417	-9999	-9999
1998	335	51300	51900	51600	342.65	7.43	-26.375	-9999	-25.77	0.605	191.667	-9999	-9999
1998	335	51900	52500	52200	342	7.61	-26.425	-9999	-25.88	0.545	192	-9999	-9999
1998	335	52500	53100	52800	343.35	7.9	-26.445	-9999	-25.91	0.535	191.583	-9999	-9999
1998	335	53100	53700	53400	344.2	7.815	-26.4	-9999	-25.92	0.48	187.25	-9999	-9999
1998	335	53700	54300	54000	343.8	7.73	-26.465	-9999	-26.05	0.415	186.917	-9999	-9999
1998	335	54300	54900	54600	342.55	7.54	-26.47	-9999	-26.06	0.41	183.167	-9999	-9999
1998	335	54900	55500	55200	341.6	7.52	-26.415	-9999	-26.02	0.395	183.75	-9999	-9999
1998	335	55500	56100	55800	341.05	7.43	-26.495	-9999	-26.065	0.43	186.167	-9999	-9999
1998	335	56100	56700	56400	340.15	7.47	-26.56	-9999	-26.165	0.395	190.75	-9999	-9999
1998	335	56700	57300	57000	342.7	7.3	-26.68	-9999	-26.265	0.415	195.583	-9999	-9999
1998	335	57300	57900	57600	344.95	7.145	-26.775	-9999	-26.285	0.49	200.917	-9999	-9999
1998	335	57900	58500	58200	346.3	7.225	-26.885	-9999	-26.27	0.615	201.667	-9999	-9999
1998	335	58500	59100	58800	348.55	6.97	-26.99	-9999	-26.355	0.635	208.5	-9999	-9999
1998	335	59100	59700	59400	351.15	7.035	-27.07	-9999	-26.34	0.73	206.75	-9999	-9999
1998	335	59700	60300	60000	351.3	6.87	-27.1	-9999	-26.145	0.955	203.667	-9999	-9999
1998	335	60300	60900	60600	353.55	6.165	-27.05	-9999	-26.165	0.885	209.667	-9999	-9999
1998	335	60900	61500	61200	351.45	5.965	-27.065	-9999	-26.37	0.695	204.778	-9999	-9999
1998	335	61500	62100	61800	349.2	6.025	-27.085	-9999	-26.405	0.68	200.417	-9999	-9999
1998	335	62100	62700	62400	347.2	6.23	-27.08	-9999	-26.48	0.6	197.083	-9999	-9999
1998	335	62700	63300	63000	347.15	5.61	-27.195	-9999	-26.6	0.595	202.917	-9999	-9999
1998	335	63300	63900	63600	348.05	5.39	-27.16	-9999	-26.775	0.385	199.167	-9999	-9999
1998	335	63900	64500	64200	344.05	5.965	-27.21	-9999	-26.75	0.46	196.75	-9999	-9999
1998	335	64500	65100	64800	343.45	6.04	-27.285	-9999	-26.735	0.55	197.083	-9999	-9999
1998	335	65100	65700	65400	344.5	5.38	-27.275	-9999	-26.795	0.48	199.917	-9999	-9999
1998	335	65700	66300	66000	343.7	5.17	-27.26	-9999	-26.79	0.47	192.583	-9999	-9999
1998	335	66300	66900	66600	342.9	5.62	-27.235	-9999	-26.76	0.475	185.417	-9999	-9999
1998	335	66900	67500	67200	345.6	5.51	-27.26	-9999	-26.76	0.5	180.333	-9999	-9999
1998	335	67500	68100	67800	347.65	6.035	-27.4	-9999	-26.77	0.63	187.083	-9999	-9999
1998	335	68100	68700	68400	347.05	6.2	-27.235	-9999	-26.585	0.65	197.25	-9999	-9999
1998	335	68700	69300	69000	347.75	6.365	-27.13	-9999	-26.45	0.68	200.667	-9999	-9999
1998	335	69300	69900	69600	347.1	6.735	-26.955	-9999	-26.42	0.535	193.75	-9999	-9999
1998	335	69900	70500	70200	345.8	7.025	-26.9	-9999	-26.3	0.6	191.083	-9999	-9999
1998	335	70500	71100	70800	343.4	7.19	-26.79	-9999	-26.3	0.49	192.667	-9999	-9999
1998	335	71100	71700	71400	343.6	7.225	-26.715	-9999	-26.305	0.41	196.417	-9999	-9999
1998	335	71700	72300	72000	344	7.005	-26.725	-9999	-26.345	0.38	265.375	-9999	-9999
1998	335	72300	72900	72600	341.25	6.62	-26.705	-9999	-26.435	0.27	184.25	-9999	-9999
1998	335	72900	73500	73200	339.6	7.045	-26.555	-9999	-26.29	0.265	177.417	-9999	-9999
1998	335	73500	74100	73800	340.8	6.97	-26.465	-9999	-26.245	0.22	300.8	-9999	-9999
1998	335	74100	74700	74400	343.65	6.875	-26.415	-9999	-26.2	0.215	174.417	-9999	-9999
1998	335	74700	75300	75000	345.25	6.755	-26.505	-9999	-26.125	0.38	179	-9999	-9999
1998	335	75300	75900	75600	346.6	6.9	-26.51	-9999	-26.135	0.375	176.75	-9999	-9999
1998	335	75900	76500	76200	346.35	6.565	-26.53	-9999	-26.25	0.28	182.333	-9999	-9999
1998	335	76500	77100	76800	347.2	6.225	-26.755	-9999	-26.4	0.355	186.111	-9999	-9999
1998	335	77100	77700	77400	347.5	6.065	-26.76	-9999	-26.455	0.305	183.333	-9999	-9999
1998	335	77700	78300	78000	348.25	6.18	-26.65	-9999	-26.475	0.175	180	-9999	-9999
1998	335	78300	78900	78600	349.8	5.94	-26.465	-9999	-26.52	-0.055	175.25	-9999	-9999
1998	335	78900	79500	79200	350.05	5.835	-26.69	-9999	-26.655	0.035	184	-9999	-9999
1998	335	83100	83700	83400	340.05	7.24	-26.91	-9999	-26.43	0.48	284	-9999	-9999
1998	335	83700	84300	84000	340.65	7.23	-26.86	-9999	-26.37	0.49	199.25	-9999	-9999
1998	335	84300	84900	84600	340.4	7.4	-26.795	-9999	-26.29	0.505	200.583	-9999	-9999
1998	335	84900	85500	85200	339.1	7.215	-26.65	-9999	-26.165	0.485	201.083	-9999	-9999
1998	335	85500	86100	85800	338.65	6.955	-26.47	-9999	-25.975	0.495	193.333	-9999	-9999
1998	335	86100	86700	86400	339.6	6.47	-26.16	-9999	-26.035	0.125	181.833	-9999	-9999
1998	336	300	900	600	338.9	6.92	-26.145	-9999	-26.15	-0.005	177.167	-9999	-9999
1998	336	900	1500	1200	342.15	6.42	-26.575	-9999	-26.475	0.1	184	-9999	-9999
1998	336	1500	2100	1800	343.15	6.33	-26.96	-9999	-26.585	0.375	185	-9999	-9999
1998	336	2100	2700	2400	338.3	7.05	-26.81	-9999	-26.375	0.435	269.778	-9999	-9999
1998	336	2700	3300	3000	341.85	6.17	-26.815	-9999	-26.435	0.38	190.583	-9999	-9999
1998	336	3300	3900	3600	342.75	5.745	-26.875	-9999	-26.425	0.45	192.917	-9999	-9999
1998	336	3900	4500	4200	343.75	5.55	-27.185	-9999	-26.42	0.765	297.2	-9999	-9999
1998	336	4500	5100	4800	345.2	5.445	-27.355	-9999	-26.48	0.875	197.25	-9999	-9999
1998	336	5100	5700	5400	344.95	5.745	-27.545	-9999	-26.695	0.85	198.333	-9999	-9999
1998	336	5700	6300	6000	341.2	6.305	-27.76	-9999	-26.81	0.95	210.778	-9999	-9999
1998	336	6300	6900	6600	343.7	6.36	-28.135	-9999	-26.785	1.35	216.417	-9999	-9999
1998	336	6900	7500	7200	342	6.795	-28	-9999	-26.83	1.17	198	-9999	-9999
1998	336	7500	8100	7800	339.25	7.315	-27.535	-9999	-26.65	0.885	188.75	-9999	-9999
1998	336	8100	8700	8400	336.35	7.41	-27.105	-9999	-26.555	0.55	181.667	-9999	-9999
1998	336	8700	9300	9000	337	7.295	-27.29	-9999	-26.765	0.525	185.417	-9999	-9999
1998	336	9300	9900	9600	338.95	7.045	-27.61	-9999	-27.05	0.56	377.5	-9999	-9999
1998	336	9900	10500	10200	339.45	7.165	-27.715	-9999	-26.935	0.78	200.5	-9999	-9999
1998	336	10500	11100	10800	337.75	7.235	-26.93	-9999	-26.44	0.49	193	-9999	-9999
1998	336	11100	11700	11400	338.5	7.49	-26.855	-9999	-26.63	0.225	187.25	-9999	-9999
1998	336	11700	12300	12000	337.85	7.695	-26.78	-9999	-26.435	0.345	181.667	-9999	-9999
1998	336	14100	14700	14400	339.15	7.255	-26.645	-9999	-26.47	0.175	129	-9999	-9999
1998	336	14700	15300	15000	340.85	6.81	-26.985	-9999	-26.69	0.295	127	-9999	-9999
1998	336	17700	18300	18000	339.75	7.135	-26.48	-9999	-26.12	0.36	180.2	-9999	-9999
1998	336	18300	18900	18600	341.45	7.44	-26.055	-9999	-26.02	0.035	167.667	-9999	-9999
1998	336	18900	19500	19200	343.6	6.86	-26.34	-9999	-26.335	0.005	172.667	-9999	-9999
1998	336	19500	20100	19800	346	7.11	-26.5	-9999	-26.45	0.05	175.667	-9999	-9999
1998	336	20100	20700	20400	349	7.075	-27.2	-9999	-26.95	0.25	187.667	-9999	-9999
1998	336	20700	21300	21000	349.55	6.8	-27.47	-9999	-27.1	0.37	198.083	-9999	-9999
1998	336	21300	21900	21600	349.55	6.98	-27.385	-9999	-27.005	0.38	201.583	-9999	-9999
1998	336	21900	22500	22200	347.05	7.145	-27.365	-9999	-26.98	0.385	208.167	-9999	-9999
1998	336	22500	23100	22800	346.6	6.73	-27.37	-9999	-27.025	0.345	207.4	-9999	-9999
1998	336	24900	25500	25200	355.95	4.915	-27.35	-9999	-27.165	0.185	210.455	-9999	-9999
1998	336	25500	26100	25800	355.55	5.245	-27.48	-9999	-27.26	0.22	205.667	-9999	-9999
1998	336	26100	26700	26400	107.8	5.185	-27.48	-9999	-27.205	0.275	210	-9999	-9999
1998	336	26700	27300	27000	354.9	5.65	-27.685	-9999	-27.24	0.445	215	-9999	-9999
1998	336	27300	27900	27600	353.75	5.985	-27.63	-9999	-27.18	0.45	212.778	-9999	-9999
1998	336	30900	31500	31200	356.25	5.91	-26.735	-9999	-26.67	0.065	218	-9999	-9999
1998	336	31500	32100	31800	267.65	6.405	-26.815	-9999	-26.665	0.15	196.583	-9999	-9999
1998	336	32100	32700	32400	71.9	6.455	-26.87	-9999	-26.675	0.195	187.4	-9999	-9999
1998	336	32700	33300	33000	321.1	6.655	-26.755	-9999	-26.545	0.21	182.286	-9999	-9999
1998	336	33300	33900	33600	4.4	6.52	-26.725	-9999	-26.485	0.24	185.667	-9999	-9999
1998	336	33900	34500	34200	3.75	6.625	-26.78	-9999	-26.51	0.27	182.25	-9999	-9999
1998	336	34500	35100	34800	1.85	7.33	-26.855	-9999	-26.565	0.29	178.5	-9999	-9999
1998	336	35100	35700	35400	3.1	7.3	-26.685	-9999	-26.33	0.355	179	-9999	-9999
1998	336	35700	36300	36000	4.65	7.155	-26.905	-9999	-26.595	0.31	181.167	-9999	-9999
1998	336	36300	36900	36600	6.05	7.04	-26.925	-9999	-26.6	0.325	182	-9999	-9999
1998	336	36900	37500	37200	4.7	7.21	-26.985	-9999	-26.665	0.32	181.917	-9999	-9999
1998	336	37500	38100	37800	2.65	7.26	-27.005	-9999	-26.695	0.31	177.917	-9999	-9999
1998	336	38100	38700	38400	5.25	7.29	-27.21	-9999	-26.845	0.365	171.833	-9999	-9999
1998	336	38700	39300	39000	3.1	7.575	-27.2	-9999	-26.9	0.3	172.083	-9999	-9999
1998	336	39300	39900	39600	3.7	7.885	-27.1	-9999	-26.8	0.3	171.667	-9999	-9999
1998	336	39900	40500	40200	6.15	7.58	-26.94	-9999	-26.6	0.34	167.5	-9999	-9999
1998	336	40500	41100	40800	7.7	7.125	-26.915	-9999	-26.475	0.44	157.833	-9999	-9999
1998	336	41100	41700	41400	6.55	7.55	-27.015	-9999	-26.68	0.335	146.417	-9999	-9999
1998	336	41700	42300	42000	5.25	7.41	-27.205	-9999	-26.77	0.435	143.583	-9999	-9999
1998	336	42300	42900	42600	7.6	7.55	-27.005	-9999	-26.545	0.46	152.917	-9999	-9999
1998	336	42900	43500	43200	9.25	7.76	-27.075	-9999	-26.675	0.4	154.083	-9999	-9999
1998	336	43500	44100	43800	10	7.51	-27.165	-9999	-26.805	0.36	157.083	-9999	-9999
1998	336	44100	44700	44400	6.7	7.71	-27.2	-9999	-26.88	0.32	152.5	-9999	-9999
1998	336	44700	45300	45000	5.8	7.875	-27.18	-9999	-26.83	0.35	147.083	-9999	-9999
1998	336	45300	45900	45600	8.05	7.705	-27.125	-9999	-26.79	0.335	151.167	-9999	-9999
1998	336	45900	46500	46200	10.8	6.67	-27.015	-9999	-26.77	0.245	151.333	-9999	-9999
1998	336	46500	47100	46800	13.05	6.66	-27.03	-9999	-26.8	0.23	146.75	-9999	-9999
1998	336	47100	47700	47400	16.2	6.355	-26.925	-9999	-26.715	0.21	142.333	-9999	-9999
1998	336	47700	48300	48000	19.95	6.055	-26.915	-9999	-26.8	0.115	143.4	-9999	-9999
1998	336	48300	48900	48600	15.65	6.205	-26.85	-9999	-26.77	0.08	144.571	-9999	-9999
1998	336	48900	49500	49200	13.9	6.47	-26.78	-9999	-26.72	0.06	145.917	-9999	-9999
1998	336	49500	50100	49800	12.6	6.825	-26.775	-9999	-26.63	0.145	149.667	-9999	-9999
1998	336	50100	50700	50400	13.2	7.15	-26.645	-9999	-26.56	0.085	148.583	-9999	-9999
1998	336	50700	51300	51000	15.15	6.905	-26.65	-9999	-26.605	0.045	152.167	-9999	-9999
1998	336	51300	51900	51600	12.4	7.5	-26.62	-9999	-26.61	0.01	152	-9999	-9999
1998	336	51900	52500	52200	10	6.955	-26.655	-9999	-26.595	0.06	154	-9999	-9999
1998	336	52500	53100	52800	8.5	7.28	-26.64	-9999	-26.6	0.04	154.75	-9999	-9999
1998	336	53100	53700	53400	6.05	7.825	-26.655	-9999	-26.62	0.035	156.417	-9999	-9999
1998	336	53700	54300	54000	2.5	8.51	-26.55	-9999	-26.63	-0.08	154.75	-9999	-9999
1998	336	54300	54900	54600	6.15	8.63	-26.56	-9999	-26.565	-0.005	152.75	-9999	-9999
1998	336	54900	55500	55200	10.5	7.9	-26.59	-9999	-26.5	0.09	153.833	-9999	-9999
1998	336	55500	56100	55800	16.9	7.085	-26.635	-9999	-26.615	0.02	158.333	-9999	-9999
1998	336	56100	56700	56400	16.1	7.37	-26.655	-9999	-26.635	0.02	161.333	-9999	-9999
1998	336	56700	57300	57000	15.7	7.7	-26.68	-9999	-26.55	0.13	168.417	-9999	-9999
1998	336	57300	57900	57600	14.55	8.15	-26.635	-9999	-26.435	0.2	164.583	-9999	-9999
1998	336	57900	58500	58200	14.55	8.01	-26.67	-9999	-26.48	0.19	162.083	-9999	-9999
1998	336	58500	59100	58800	15.85	7.365	-26.71	-9999	-26.555	0.155	160.417	-9999	-9999
1998	336	59100	59700	59400	14.8	7.765	-26.63	-9999	-26.37	0.26	152.333	-9999	-9999
1998	336	59700	60300	60000	13.5	8.275	-26.545	-9999	-26.28	0.265	153.167	-9999	-9999
1998	336	60300	60900	60600	13.55	8.83	-26.44	-9999	-26.235	0.205	148.25	-9999	-9999
1998	336	60900	61500	61200	19.6	8.325	-26.54	-9999	-26.265	0.275	148.417	-9999	-9999
1998	336	61500	62100	61800	18.9	8.3	-26.6	-9999	-26.3	0.3	147.667	-9999	-9999
1998	336	62100	62700	62400	18.55	8.26	-26.605	-9999	-26.33	0.275	153	-9999	-9999
1998	336	62700	63300	63000	18.55	7.79	-26.725	-9999	-26.525	0.2	154.333	-9999	-9999
1998	336	63300	63900	63600	18.7	7.795	-26.595	-9999	-26.385	0.21	157.6	-9999	-9999
1998	336	63900	64500	64200	16.6	8.065	-26.475	-9999	-26.185	0.29	137.857	-9999	-9999
1998	336	64500	65100	64800	20.25	7.965	-26.425	-9999	-26.09	0.335	144.417	-9999	-9999
1998	336	65100	65700	65400	21.65	7.32	-26.56	-9999	-26.42	0.14	152.583	-9999	-9999
1998	336	65700	66300	66000	21.9	8.15	-26.615	-9999	-26.235	0.38	154.583	-9999	-9999
1998	336	66300	66900	66600	23.35	8.27	-26.675	-9999	-26.17	0.505	157.25	-9999	-9999
1998	336	66900	67500	67200	23.35	8.165	-26.7	-9999	-26.125	0.575	159.5	-9999	-9999
1998	336	67500	68100	67800	23.6	8.355	-26.695	-9999	-26.14	0.555	160.25	-9999	-9999
1998	336	68100	68700	68400	22.6	8.265	-26.675	-9999	-26.08	0.595	157.667	-9999	-9999
1998	336	68700	69300	69000	22.45	8.745	-26.57	-9999	-25.86	0.71	156	-9999	-9999
1998	336	71100	71700	71400	23.65	8.225	-26.565	-9999	-26.005	0.56	162	-9999	-9999
1998	336	71700	72300	72000	23.15	8.285	-26.53	-9999	-26.125	0.405	154.833	-9999	-9999
1998	336	72300	72900	72600	22.65	8.235	-26.615	-9999	-26.3	0.315	151.417	-9999	-9999
1998	336	72900	73500	73200	21.55	8.22	-26.59	-9999	-26.225	0.365	151.667	-9999	-9999
1998	336	73500	74100	73800	21.1	8	-26.585	-9999	-26.2	0.385	144.583	-9999	-9999
1998	336	74100	74700	74400	15.4	9.43	-26.355	-9999	-25.825	0.53	142.417	-9999	-9999
1998	336	74700	75300	75000	20.65	8.545	-26.63	-9999	-25.93	0.7	151.167	-9999	-9999
1998	336	75300	75900	75600	20.35	8.17	-26.755	-9999	-26.09	0.665	156.333	-9999	-9999
1998	336	75900	76500	76200	19.7	8.095	-26.81	-9999	-26.075	0.735	155.167	-9999	-9999
1998	336	76500	77100	76800	18.35	8.815	-26.66	-9999	-25.835	0.825	148.667	-9999	-9999
1998	336	77100	77700	77400	16.65	9.4	-26.635	-9999	-25.875	0.76	149.833	-9999	-9999
1998	336	77700	78300	78000	16.9	9.415	-26.625	-9999	-25.99	0.635	152.5	-9999	-9999
1998	336	78300	78900	78600	18.6	8.88	-26.74	-9999	-26.1	0.64	155	-9999	-9999
1998	336	78900	79500	79200	22.45	8.225	-26.685	-9999	-26.19	0.495	150.6	-9999	-9999
1998	336	79500	80100	79800	25.95	7.555	-26.795	-9999	-26.315	0.48	151.857	-9999	-9999
1998	336	80100	80700	80400	18.95	8.21	-26.715	-9999	-26.025	0.69	151.167	-9999	-9999
1998	336	80700	81300	81000	18.7	8.045	-26.645	-9999	-25.91	0.735	145.25	-9999	-9999
1998	336	81300	81900	81600	20.15	8.18	-26.655	-9999	-26.105	0.55	147	-9999	-9999
1998	336	81900	82500	82200	20.5	8.155	-26.655	-9999	-26.115	0.54	147.25	-9999	-9999
1998	336	82500	83100	82800	18.75	8.18	-26.67	-9999	-26.145	0.525	146.833	-9999	-9999
1998	336	83100	83700	83400	15.15	8.985	-26.59	-9999	-25.93	0.66	143.583	-9999	-9999
1998	336	83700	84300	84000	11.4	9.09	-26.57	-9999	-25.835	0.735	141	-9999	-9999
1998	336	84300	84900	84600	11.9	9.365	-26.545	-9999	-25.74	0.805	140.583	-9999	-9999
1998	336	84900	85500	85200	12.3	9.105	-26.575	-9999	-25.85	0.725	143.833	-9999	-9999
1998	336	85500	86100	85800	14.85	8.715	-26.605	-9999	-25.925	0.68	146.25	-9999	-9999
1998	336	86100	86700	86400	17.75	8.385	-26.595	-9999	-25.97	0.625	149.417	-9999	-9999
1998	337	300	900	600	18.5	7.995	-26.625	-9999	-26.325	0.3	148.333	-9999	-9999
1998	337	900	1500	1200	18.55	8.16	-26.635	-9999	-26.255	0.38	149.167	-9999	-9999
1998	337	1500	2100	1800	16.45	8.455	-26.62	-9999	-26.065	0.555	146.083	-9999	-9999
1998	337	2100	2700	2400	14.25	8.645	-26.66	-9999	-26	0.66	142.75	-9999	-9999
1998	337	2700	3300	3000	17.1	8.725	-26.605	-9999	-25.955	0.65	139.833	-9999	-9999
1998	337	3300	3900	3600	16	8.9	-26.465	-9999	-25.87	0.595	137.333	-9999	-9999
1998	337	3900	4500	4200	14.7	8.965	-26.39	-9999	-25.805	0.585	136.833	-9999	-9999
1998	337	4500	5100	4800	14.2	9.115	-26.4	-9999	-25.92	0.48	136.667	-9999	-9999
1998	337	5100	5700	5400	15.7	9.285	-26.4	-9999	-25.86	0.54	139	-9999	-9999
1998	337	5700	6300	6000	16.85	9.24	-26.42	-9999	-25.87	0.55	137.667	-9999	-9999
1998	337	6300	6900	6600	19.25	8.915	-26.45	-9999	-25.875	0.575	137.583	-9999	-9999
1998	337	6900	7500	7200	19.9	8.985	-26.44	-9999	-25.845	0.595	137.167	-9999	-9999
1998	337	7500	8100	7800	21.2	9.17	-26.43	-9999	-25.775	0.655	136.417	-9999	-9999
1998	337	8100	8700	8400	21.05	9.145	-26.44	-9999	-25.9	0.54	140.2	-9999	-9999
1998	337	8700	9300	9000	22.2	8.925	-26.495	-9999	-25.965	0.53	137.714	-9999	-9999
1998	337	9300	9900	9600	21.75	8.88	-26.565	-9999	-25.98	0.585	139.75	-9999	-9999
1998	337	9900	10500	10200	20.5	8.96	-26.48	-9999	-25.925	0.555	138.5	-9999	-9999
1998	337	10500	11100	10800	20.5	8.825	-26.415	-9999	-25.895	0.52	135.167	-9999	-9999
1998	337	11100	11700	11400	19.05	8.905	-26.32	-9999	-25.745	0.575	132.917	-9999	-9999
1998	337	11700	12300	12000	18.75	9.155	-26.21	-9999	-25.77	0.44	130.5	-9999	-9999
1998	337	12300	12900	12600	14.8	9.435	-26.07	-9999	-25.66	0.41	129.833	-9999	-9999
1998	337	12900	13500	13200	16.25	9.115	-26.185	-9999	-25.68	0.505	130.917	-9999	-9999
1998	337	13500	14100	13800	18.35	9.1	-26.08	-9999	-25.61	0.47	130.667	-9999	-9999
1998	337	14100	14700	14400	18.35	8.89	-26.08	-9999	-25.615	0.465	131.667	-9999	-9999
1998	337	21900	22500	22200	16.55	9.5	-25.575	-9999	-25.19	0.385	130	-9999	-9999
1998	337	60900	61500	61200	125.7	7.25	-24.975	-9999	-24.665	0.31	130.714	-9999	-9999
1998	337	61500	62100	61800	57.2	6.88	-25.005	-9999	-24.75	0.255	135	-9999	-9999
1998	341	26700	27300	27000	70.4	3.8	-28.505	-9999	-28.455	0.05	359	-9999	-9999
1998	341	27300	27900	27600	70.3	3.74	-28.46	-9999	-28.425	0.035	355.093	-9999	-9999
1998	341	27900	28500	28200	70.65	3.815	-28.46	-9999	-28.43	0.03	353.594	-9999	-9999
1998	341	28500	29100	28800	68.85	3.73	-28.415	-9999	-28.4	0.015	355.9	-9999	-9999
1998	341	29100	29700	29400	69.6	3.635	-28.45	-9999	-28.54	-0.09	355.007	-9999	-9999
1998	341	29700	30300	30000	66.2	3.63	-28.42	-9999	-28.5	-0.08	352.312	-9999	-9999
1998	341	30300	30900	30600	63.4	3.72	-28.4	-9999	-28.455	-0.055	349.417	-9999	-9999
1998	341	30900	31500	31200	66.75	3.525	-28.435	-9999	-28.455	-0.02	355.98	-9999	-9999
1998	341	31500	32100	31800	67.95	3.29	-28.545	-9999	-28.525	0.02	368.755	-9999	-9999
1998	341	32100	32700	32400	70.1	3.32	-28.54	-9999	-28.6	-0.06	373.967	-9999	-9999
1998	341	32700	33300	33000	70.25	3.305	-28.58	-9999	-28.6	-0.02	375.667	-9999	-9999
1998	341	33300	33900	33600	70.05	3.31	-28.6	-9999	-28.615	-0.015	382.64	-9999	-9999
1998	341	33900	34500	34200	70.3	3.56	-28.675	-9999	-28.755	-0.08	388.736	-9999	-9999
1998	341	34500	35100	34800	71.7	3.465	-28.715	-9999	-28.8	-0.085	397.05	-9999	-9999
1998	341	35100	35700	35400	72.7	3.36	-28.8	-9999	-28.8	0	407.257	-9999	-9999
1998	341	35700	36300	36000	75.1	3.13	-28.8	-9999	-28.825	-0.025	412.806	-9999	-9999
1998	343	3900	4500	4200	46.9	3.515	-30.9	-9999	-30.87	0.03	252.217	-9999	-9999
1998	343	4500	5100	4800	50.35	3.355	-30.985	-9999	-30.88	0.105	268.28	-9999	-9999
1998	343	5100	5700	5400	50.5	3.26	-30.995	-9999	-30.805	0.19	276.858	-9999	-9999
1998	343	5700	6300	6000	54.75	3.045	-30.995	-9999	-30.93	0.065	299.434	-9999	-9999
1998	343	6300	6900	6600	58	3.12	-31.035	-9999	-30.93	0.105	312.76	-9999	-9999
1998	343	6900	7500	7200	59.2	2.95	-31.1	-9999	-31.075	0.025	315.418	-9999	-9999
1998	343	7500	8100	7800	59.85	2.915	-31.14	-9999	-31.015	0.125	321.746	-9999	-9999
1998	343	8100	8700	8400	55.9	3.275	-31.015	-9999	-30.99	0.025	337.088	-9999	-9999
1998	343	8700	9300	9000	52.15	3.41	-30.93	-9999	-30.87	0.06	353.575	-9999	-9999
1998	343	9300	9900	9600	48.4	3.52	-30.77	-9999	-30.715	0.055	353.08	-9999	-9999
1998	343	9900	10500	10200	47	3.375	-30.67	-9999	-30.665	0.005	353.16	-9999	-9999
1998	343	10500	11100	10800	40.45	3.675	-30.555	-9999	-30.51	0.045	332.195	-9999	-9999
1998	343	11100	11700	11400	35.2	3.81	-30.545	-9999	-30.435	0.11	280.099	-9999	-9999
1998	343	11700	12300	12000	30.75	4.205	-30.22	-9999	-30.25	-0.03	255.596	-9999	-9999
1998	343	12300	12900	12600	29.5	4.38	-30.265	-9999	-30.27	-0.005	248.486	-9999	-9999
1998	343	12900	13500	13200	27.75	4.285	-30.295	-9999	-30.225	0.07	244.496	-9999	-9999
1998	343	13500	14100	13800	25.65	4.295	-30.115	-9999	-30.1	0.015	236.6	-9999	-9999
1998	343	14100	14700	14400	20.85	5.265	-29.665	-9999	-29.7	-0.035	209	-9999	-9999
1998	343	14700	15300	15000	19.3	5.35	-29.6	-9999	-29.6	0	189.427	-9999	-9999
1998	343	15300	15900	15600	20.7	5.275	-29.61	-9999	-29.6	0.01	188.598	-9999	-9999
1998	343	15900	16500	16200	23.7	5.33	-29.76	-9999	-29.695	0.065	197.501	-9999	-9999
1998	343	16500	17100	16800	23.5	5.275	-29.965	-9999	-29.865	0.1	199.669	-9999	-9999
1998	343	17100	17700	17400	24.15	5.095	-29.86	-9999	-29.79	0.07	206.601	-9999	-9999
1998	343	17700	18300	18000	26	5.165	-29.86	-9999	-29.83	0.03	225.19	-9999	-9999
1998	343	18300	18900	18600	24.05	5.15	-29.9	-9999	-29.8	0.1	229.971	-9999	-9999
1998	343	18900	19500	19200	23.55	5.165	-29.9	-9999	-29.8	0.1	231.122	-9999	-9999
1998	343	19500	20100	19800	24.45	5.115	-29.9	-9999	-29.8	0.1	229.078	-9999	-9999
1998	343	20100	20700	20400	21.15	5.11	-29.895	-9999	-29.84	0.055	224.41	-9999	-9999
1998	343	20700	21300	21000	17.75	5.035	-29.915	-9999	-29.88	0.035	223.169	-9999	-9999
1998	343	21300	21900	21600	14.8	4.905	-29.9	-9999	-29.8	0.1	223.384	-9999	-9999
1998	343	21900	22500	22200	13.65	4.955	-29.88	-9999	-29.815	0.065	219.553	-9999	-9999
1998	343	22500	23100	22800	14.1	4.725	-29.95	-9999	-29.93	0.02	236.213	-9999	-9999
1998	343	23100	23700	23400	13.05	4.695	-29.835	-9999	-29.835	0	238.384	-9999	-9999
1998	343	23700	24300	24000	13.15	4.915	-29.79	-9999	-29.775	0.015	233.629	-9999	-9999
1998	343	24300	24900	24600	12.5	4.96	-29.865	-9999	-29.785	0.08	234.233	-9999	-9999
1998	343	24900	25500	25200	11.55	4.895	-29.86	-9999	-29.845	0.015	237.878	-9999	-9999
1998	343	25500	26100	25800	11.3	4.745	-29.905	-9999	-29.875	0.03	239.973	-9999	-9999
1998	343	26100	26700	26400	11.55	4.92	-29.955	-9999	-29.81	0.145	243.003	-9999	-9999
1998	343	26700	27300	27000	9.35	4.955	-29.9	-9999	-29.775	0.125	234.34	-9999	-9999
1998	343	27300	27900	27600	11.2	4.725	-29.935	-9999	-29.755	0.18	247.955	-9999	-9999
1998	343	27900	28500	28200	12.7	4.425	-29.995	-9999	-29.88	0.115	260.085	-9999	-9999
1998	343	28500	29100	28800	10.1	4.445	-29.935	-9999	-29.82	0.115	240.348	-9999	-9999
1998	343	29100	29700	29400	10.7	4.46	-30.03	-9999	-29.93	0.1	262.906	-9999	-9999
1998	343	29700	30300	30000	10.8	4.42	-30.075	-9999	-29.915	0.16	271.603	-9999	-9999
1998	343	30300	30900	30600	11.35	4.405	-30.09	-9999	-29.92	0.17	278.374	-9999	-9999
1998	343	30900	31500	31200	13.55	4.4	-30.015	-9999	-29.88	0.135	276.524	-9999	-9999
1998	343	31500	32100	31800	14.85	4.565	-30	-9999	-29.835	0.165	276.655	-9999	-9999
1998	343	32100	32700	32400	14.75	4.56	-29.935	-9999	-29.765	0.17	268.638	-9999	-9999
1998	343	32700	33300	33000	15.5	4.295	-29.955	-9999	-29.82	0.135	269.284	-9999	-9999
1998	343	33300	33900	33600	14.1	4.145	-30	-9999	-29.88	0.12	277.3	-9999	-9999
1998	343	33900	34500	34200	16.9	4.035	-30.05	-9999	-29.89	0.16	291.603	-9999	-9999
1998	343	34500	35100	34800	19.05	4.035	-30.035	-9999	-29.945	0.09	307.442	-9999	-9999
1998	343	35100	35700	35400	20.85	4.04	-30.085	-9999	-30	0.085	315.629	-9999	-9999
1998	343	35700	36300	36000	18.45	3.96	-30.005	-9999	-30	0.005	320.275	-9999	-9999
1998	343	36300	36900	36600	19.65	4.005	-30.1	-9999	-30.16	-0.06	330.842	-9999	-9999
1998	343	36900	37500	37200	19.1	4.17	-30.175	-9999	-30.17	0.005	341.609	-9999	-9999
1998	343	37500	38100	37800	18.6	4.32	-30.175	-9999	-30.115	0.06	340.876	-9999	-9999
1998	343	38100	38700	38400	18.1	4.29	-30.1	-9999	-30.005	0.095	330.507	-9999	-9999
1998	343	38700	39300	39000	17.75	4.285	-30.055	-9999	-29.99	0.065	326.659	-9999	-9999
1998	343	39300	39900	39600	16.5	4.12	-30.035	-9999	-29.98	0.055	333	-9999	-9999
1998	343	39900	40500	40200	15.85	4.215	-30.09	-9999	-30.01	0.08	337.797	-9999	-9999
1998	343	40500	41100	40800	16.2	4.16	-30.155	-9999	-30.01	0.145	351.967	-9999	-9999
1998	343	41100	41700	41400	17.35	4.21	-30.21	-9999	-29.99	0.22	375.566	-9999	-9999
1998	343	41700	42300	42000	16.9	4.165	-30.285	-9999	-30	0.285	384.496	-9999	-9999
1998	343	42300	42900	42600	16.05	4.095	-30.3	-9999	-30.005	0.295	383.565	-9999	-9999
1998	343	42900	43500	43200	14.6	3.995	-30.405	-9999	-30.22	0.185	387.444	-9999	-9999
1998	343	43500	44100	43800	15.05	4.15	-30.345	-9999	-30.215	0.13	367.582	-9999	-9999
1998	343	44100	44700	44400	12.9	4.285	-30.275	-9999	-30.185	0.09	352.86	-9999	-9999
1998	343	44700	45300	45000	10.75	4.36	-30.24	-9999	-30.165	0.075	332.038	-9999	-9999
1998	343	45300	45900	45600	12.1	4.41	-30.205	-9999	-30.18	0.025	338.952	-9999	-9999
1998	343	45900	46500	46200	12.5	4.14	-30.29	-9999	-30.285	0.005	342.195	-9999	-9999
1998	343	46500	47100	46800	14.05	4.315	-30.3	-9999	-30.215	0.085	342.886	-9999	-9999
1998	343	47100	47700	47400	10.75	4.495	-30.235	-9999	-30.175	0.06	326	-9999	-9999
1998	343	47700	48300	48000	9.8	4.545	-30.185	-9999	-30.095	0.09	324.177	-9999	-9999
1998	343	48300	48900	48600	11.8	4.64	-30.115	-9999	-30.05	0.065	327.062	-9999	-9999
1998	343	48900	49500	49200	11.35	4.575	-30.2	-9999	-30.21	-0.01	346.718	-9999	-9999
1998	343	49500	50100	49800	8.55	4.63	-30.175	-9999	-30.16	0.015	342.71	-9999	-9999
1998	343	50100	50700	50400	7.05	4.63	-30.145	-9999	-30.13	0.015	326.778	-9999	-9999
1998	343	50700	51300	51000	8.7	4.505	-30.155	-9999	-30.2	-0.045	327.883	-9999	-9999
1998	343	51300	51900	51600	8.55	4.355	-30.17	-9999	-30.295	-0.125	342.292	-9999	-9999
1998	343	51900	52500	52200	8.2	4.4	-30.12	-9999	-30.245	-0.125	337.84	-9999	-9999
1998	343	52500	53100	52800	4.7	4.435	-30.09	-9999	-30.245	-0.155	327.05	-9999	-9999
1998	343	53100	53700	53400	4.8	4.13	-30.125	-9999	-30.3	-0.175	346.489	-9999	-9999
1998	343	53700	54300	54000	4.6	4.2	-30.215	-9999	-30.445	-0.23	342.537	-9999	-9999
1998	343	54300	54900	54600	6.45	4.29	-30.245	-9999	-30.4	-0.155	332.33	-9999	-9999
1998	343	54900	55500	55200	7	4.125	-30.2	-9999	-30.41	-0.21	344.371	-9999	-9999
1998	343	55500	56100	55800	3.4	4.04	-30.295	-9999	-30.455	-0.16	358.885	-9999	-9999
1998	343	56100	56700	56400	3.1	3.92	-30.375	-9999	-30.575	-0.2	364.133	-9999	-9999
1998	343	56700	57300	57000	2.1	4.07	-30.4	-9999	-30.54	-0.14	350.194	-9999	-9999
1998	343	57300	57900	57600	55.2	4.07	-30.445	-9999	-30.535	-0.09	360.334	-9999	-9999
1998	343	57900	58500	58200	143.6	4.01	-30.53	-9999	-30.55	-0.02	358.159	-9999	-9999
1998	343	58500	59100	58800	322	3.895	-30.52	-9999	-30.59	-0.07	340.56	-9999	-9999
1998	343	59100	59700	59400	197.45	3.86	-30.34	-9999	-30.445	-0.105	296.763	-9999	-9999
1998	343	59700	60300	60000	231.3	4.12	-30.105	-9999	-30.28	-0.175	199.591	-9999	-9999
1998	343	60300	60900	60600	352.2	4.23	-30.015	-9999	-30.15	-0.135	117.593	-9999	-9999
1998	343	60900	61500	61200	349.9	3.91	-30.12	-9999	-30.27	-0.15	122.725	-9999	-9999
1998	343	61500	62100	61800	352.35	3.645	-30.15	-9999	-30.2	-0.05	150	-9999	-9999
1998	343	62100	62700	62400	349.6	3.495	-30.19	-9999	-30.2	-0.01	185.018	-9999	-9999
1998	343	62700	63300	63000	346.35	3.59	-30.335	-9999	-30.295	0.04	199.527	-9999	-9999
1998	343	63300	63900	63600	343.15	3.455	-30.505	-9999	-30.445	0.06	194.579	-9999	-9999
1998	343	63900	64500	64200	346.5	3.34	-30.54	-9999	-30.465	0.075	213.895	-9999	-9999
1998	343	64500	65100	64800	346.95	3.315	-30.405	-9999	-30.5	-0.095	215.591	-9999	-9999
1998	343	65100	65700	65400	347.35	3.34	-30.5	-9999	-30.51	-0.01	223.419	-9999	-9999
1998	343	65700	66300	66000	346.4	3.285	-30.665	-9999	-30.555	0.11	259.127	-9999	-9999
1998	343	66300	66900	66600	343.65	3.21	-30.715	-9999	-30.685	0.03	290.653	-9999	-9999
1998	343	66900	67500	67200	345.8	3.165	-30.815	-9999	-30.715	0.1	307.244	-9999	-9999
1998	343	67500	68100	67800	345.4	3.005	-30.895	-9999	-30.8	0.095	330.79	-9999	-9999
1998	343	68100	68700	68400	346.75	2.955	-31	-9999	-30.78	0.22	361.915	-9999	-9999
1998	343	68700	69300	69000	346.6	3.04	-31.03	-9999	-30.82	0.21	382.326	-9999	-9999
1998	343	69300	69900	69600	347.95	3.105	-31.02	-9999	-30.81	0.21	400.16	-9999	-9999
1998	343	69900	70500	70200	342.35	3.055	-31.11	-9999	-30.945	0.165	420.507	-9999	-9999
1998	343	70500	71100	70800	343.3	3.11	-31.28	-9999	-30.975	0.305	436.099	-9999	-9999
1998	343	71100	71700	71400	346.05	3.105	-31.31	-9999	-31.015	0.295	433.199	-9999	-9999
1998	343	71700	72300	72000	343.4	3.235	-31.445	-9999	-31.155	0.29	437.319	-9999	-9999
1998	343	72300	72900	72600	344.95	3.38	-31.555	-9999	-31.2	0.355	416.589	-9999	-9999
1998	343	72900	73500	73200	342.4	3.45	-31.585	-9999	-31.18	0.405	420.476	-9999	-9999
1998	343	73500	74100	73800	341.05	3.45	-31.53	-9999	-31.285	0.245	459.661	-9999	-9999
1998	343	74100	74700	74400	340.45	3.48	-31.425	-9999	-31.395	0.03	397.801	-9999	-9999
1998	343	74700	75300	75000	334.05	3.13	-31.4	-9999	-31.485	-0.085	360.691	-9999	-9999
1998	343	75300	75900	75600	340.35	2.77	-31.29	-9999	-31.44	-0.15	466.726	-9999	-9999
1998	343	75900	76500	76200	335.7	2.955	-31.2	-9999	-31.25	-0.05	267.992	-9999	-9999
1998	343	76500	77100	76800	342.95	2.83	-31.3	-9999	-31.435	-0.135	333.652	-9999	-9999
1998	343	77100	77700	77400	344	2.885	-31.53	-9999	-31.655	-0.125	482.518	-9999	-9999
1998	343	77700	78300	78000	340.5	3.265	-31.69	-9999	-31.81	-0.12	421.2	-9999	-9999
1998	343	78300	78900	78600	337.8	2.975	-31.84	-9999	-31.835	0.005	332	-9999	-9999
1998	343	78900	79500	79200	343.2	2.91	-31.85	-9999	-31.82	0.03	327.444	-9999	-9999
1998	343	79500	80100	79800	346.8	2.91	-31.8	-9999	-31.63	0.17	323.487	-9999	-9999
1998	343	80100	80700	80400	349.6	2.77	-31.8	-9999	-31.54	0.26	271.947	-9999	-9999
1998	343	80700	81300	81000	346	2.84	-31.8	-9999	-31.405	0.395	241.745	-9999	-9999
1998	343	81300	81900	81600	345.2	2.735	-31.8	-9999	-31.4	0.4	311.786	-9999	-9999
1998	343	81900	82500	82200	339.05	2.815	-31.67	-9999	-31.385	0.285	309.332	-9999	-9999
1998	343	82500	83100	82800	340.5	2.68	-31.71	-9999	-31.455	0.255	517.25	-9999	-9999
1998	343	84300	84900	84600	329.8	2.39	-31.915	-9999	-31.61	0.305	382.23	-9999	-9999
1998	343	84900	85500	85200	323.5	2.37	-31.9	-9999	-31.655	0.245	405.716	-9999	-9999
1998	343	85500	86100	85800	323.9	2.3	-32.095	-9999	-31.865	0.23	401	-9999	-9999
1998	344	900	1500	1200	334.15	2.265	-32.065	-9999	-32.01	0.055	514.648	-9999	-9999
1998	344	1500	2100	1800	321.6	2.24	-32.09	-9999	-32.105	-0.015	495.09	-9999	-9999
1998	344	3300	3900	3600	329.7	1.85	-32.1	-9999	-32.19	-0.09	526.94	-9999	-9999
1998	344	3900	4500	4200	325.85	1.885	-32.1	-9999	-32.15	-0.05	534.159	-9999	-9999
1998	344	4500	5100	4800	322.05	1.995	-32.015	-9999	-32.045	-0.03	560.744	-9999	-9999
1998	344	6300	6900	6600	314.2	1.93	-32.01	-9999	-31.875	0.135	927	-9999	-9999
1998	344	6900	7500	7200	320.75	1.98	-32.11	-9999	-31.865	0.245	657.763	-9999	-9999
1998	344	8700	9300	9000	311.7	2.115	-31.91	-9999	-31.86	0.05	983	-9999	-9999
1998	344	9300	9900	9600	312.4	1.855	-31.875	-9999	-31.945	-0.07	739.492	-9999	-9999
1998	344	9900	10500	10200	304.9	1.95	-31.79	-9999	-31.84	-0.05	822.571	-9999	-9999
1998	344	11700	12300	12000	292.15	2.02	-31.6	-9999	-31.65	-0.05	302.259	-9999	-9999
1998	344	12300	12900	12600	290.95	2.055	-31.555	-9999	-31.61	-0.055	305.874	-9999	-9999
1998	344	14100	14700	14400	289.95	2.045	-31.525	-9999	-31.655	-0.13	311.286	-9999	-9999
1998	344	14700	15300	15000	287.45	1.875	-31.49	-9999	-31.59	-0.1	339.65	-9999	-9999
1998	344	15300	15900	15600	287.15	1.855	-31.45	-9999	-31.535	-0.085	357.217	-9999	-9999
1998	344	17100	17700	17400	289.9	1.64	-31.565	-9999	-31.59	-0.025	348.384	-9999	-9999
1998	344	17700	18300	18000	294.6	1.555	-31.54	-9999	-31.545	-0.005	340.081	-9999	-9999
1998	344	19500	20100	19800	304	1.335	-31.21	-9999	-31.445	-0.235	343.353	-9999	-9999
1998	344	20100	20700	20400	298.5	1.44	-31.435	-9999	-31.565	-0.13	334.124	-9999	-9999
1998	344	20700	21300	21000	296.5	1.73	-31.52	-9999	-31.42	0.1	330.438	-9999	-9999
1998	344	22500	23100	22800	297.75	1.87	-31.6	-9999	-31.445	0.155	312.027	-9999	-9999
1998	344	23100	23700	23400	306.2	1.97	-31.535	-9999	-31.425	0.11	341.189	-9999	-9999
1998	344	24900	25500	25200	316.65	1.65	-31.555	-9999	-31.75	-0.195	469.26	-9999	-9999
1998	344	25500	26100	25800	323.15	1.925	-31.66	-9999	-31.615	0.045	550.432	-9999	-9999
1998	344	26100	26700	26400	331.25	2.245	-31.745	-9999	-31.64	0.105	572.974	-9999	-9999
1998	344	27900	28500	28200	327.5	2.36	-32.01	-9999	-31.85	0.16	637.106	-9999	-9999
1998	344	28500	29100	28800	327.25	2.47	-31.95	-9999	-31.795	0.155	632.229	-9999	-9999
1998	344	30300	30900	30600	325.7	2.535	-32.2	-9999	-31.8	0.4	618.608	-9999	-9999
1998	344	30900	31500	31200	325.95	2.525	-32.145	-9999	-31.81	0.335	647.579	-9999	-9999
1998	344	31500	32100	31800	325.9	2.465	-32.1	-9999	-31.735	0.365	670.405	-9999	-9999
1998	344	33300	33900	33600	331	2.53	-31.935	-9999	-31.605	0.33	687.638	-9999	-9999
1998	344	33900	34500	34200	333.3	2.665	-32.03	-9999	-31.645	0.385	663.295	-9999	-9999
1998	344	35700	36300	36000	333.55	2.78	-31.84	-9999	-31.715	0.125	638.143	-9999	-9999
1998	344	36300	36900	36600	328.25	2.915	-31.69	-9999	-31.615	0.075	584.725	-9999	-9999
1998	344	36900	37500	37200	326.6	2.855	-31.6	-9999	-31.595	0.005	547.217	-9999	-9999
1998	344	38700	39300	39000	325.1	3.195	-31.245	-9999	-31.215	0.03	433.845	-9999	-9999
1998	344	39300	39900	39600	325.65	3.19	-31.2	-9999	-31.235	-0.035	416.84	-9999	-9999
1998	344	41100	41700	41400	315.75	3.16	-30.745	-9999	-30.715	0.03	250.955	-9999	-9999
1998	344	41700	42300	42000	314.55	3.33	-30.7	-9999	-30.735	-0.035	256.145	-9999	-9999
1998	344	42300	42900	42600	316.45	3.405	-30.755	-9999	-30.88	-0.125	258.853	-9999	-9999
1998	344	44100	44700	44400	325.5	3.565	-30.67	-9999	-30.815	-0.145	293.684	-9999	-9999
1998	344	44700	45300	45000	325.95	3.425	-30.66	-9999	-30.8	-0.14	307.709	-9999	-9999
1998	344	46500	47100	46800	336.25	3.4	-30.69	-9999	-30.9	-0.21	341.702	-9999	-9999
1998	344	47100	47700	47400	335.8	3.42	-30.625	-9999	-30.855	-0.23	346.129	-9999	-9999
1998	344	47700	48300	48000	336.85	3.255	-30.57	-9999	-30.745	-0.175	349.899	-9999	-9999
1998	344	49500	50100	49800	335	3.045	-30.6	-9999	-30.58	0.02	260.697	-9999	-9999
1998	344	50100	50700	50400	336	3.05	-30.7	-9999	-30.635	0.065	251	-9999	-9999
1998	344	51900	52500	52200	334.7	3.44	-30.7	-9999	-30.66	0.04	212.182	-9999	-9999
1998	344	52500	53100	52800	333.5	3.48	-30.785	-9999	-30.855	-0.07	212.71	-9999	-9999
1998	344	53100	53700	53400	331.35	3.595	-30.845	-9999	-30.885	-0.04	216.06	-9999	-9999
1998	344	54900	55500	55200	314	5.01	-30.48	-9999	-30.53	-0.05	201.418	-9999	-9999
1998	344	55500	56100	55800	311.35	5.315	-30.305	-9999	-30.42	-0.115	204.639	-9999	-9999
1998	344	57300	57900	57600	310.55	5.115	-30.51	-9999	-30.535	-0.025	238.714	-9999	-9999
1998	344	57900	58500	58200	310.75	4.745	-30.68	-9999	-30.7	-0.02	246.316	-9999	-9999
1998	344	58500	59100	58800	313.2	4.435	-30.53	-9999	-30.635	-0.105	245.115	-9999	-9999
1998	344	59100	59700	59400	312.35	4.7	-30.435	-9999	-30.57	-0.135	238.447	-9999	-9999
1998	344	60900	61500	61200	313.35	4.4	-30.655	-9999	-30.685	-0.03	250.868	-9999	-9999
1998	344	61500	62100	61800	308.65	4.585	-30.6	-9999	-30.66	-0.06	249.867	-9999	-9999
1998	344	62100	62700	62400	309.15	5.16	-30.6	-9999	-30.665	-0.065	232	-9999	-9999
1998	344	63900	64500	64200	304.9	5.17	-30.865	-9999	-30.88	-0.015	226.958	-9999	-9999
1998	344	64500	65100	64800	304	4.905	-30.975	-9999	-30.955	0.02	238.644	-9999	-9999
1998	344	66300	66900	66600	303.15	4.715	-31.065	-9999	-30.965	0.1	216.857	-9999	-9999
1998	344	66900	67500	67200	304.35	4.55	-31.035	-9999	-30.965	0.07	214.182	-9999	-9999
1998	344	67500	68100	67800	305.4	4.275	-31.09	-9999	-31.06	0.03	213.952	-9999	-9999
1998	344	72300	72900	72600	304.05	4.995	-30.835	-9999	-30.82	0.015	543	-9999	-9999
1998	344	72900	73500	73200	306.3	4.82	-30.885	-9999	-30.945	-0.06	543	-9999	-9999
1998	344	74700	75300	75000	306.85	5.19	-30.575	-9999	-30.495	0.08	367.854	-9999	-9999
1998	344	75300	75900	75600	307.7	4.935	-30.685	-9999	-30.605	0.08	271.143	-9999	-9999
1998	344	77100	77700	77400	308.35	5.17	-30.385	-9999	-30.225	0.16	165.895	-9999	-9999
1998	344	77700	78300	78000	309.75	5.01	-30.305	-9999	-30.22	0.085	185.612	-9999	-9999
1998	344	78300	78900	78600	311.8	4.99	-30.355	-9999	-30.265	0.09	176.471	-9999	-9999
1998	344	80100	80700	80400	308.1	5.27	-29.645	-9999	-29.615	0.03	159.014	-9999	-9999
1998	344	80700	81300	81000	306.85	5.16	-29.43	-9999	-29.365	0.065	156.763	-9999	-9999
1998	344	83100	83700	83400	298.75	5.975	-28.76	-9999	-28.665	0.095	597.867	-9999	-9999
1998	344	83700	84300	84000	299	5.825	-28.63	-9999	-28.405	0.225	360.775	-9999	-9999
1998	344	85500	86100	85800	296.15	5.23	-28.61	-9999	-28.345	0.265	116.942	-9999	-9999
1998	344	86100	86700	86400	293	5.27222	-28.2111	-9999	-28.1278	0.0833333	108.407	-9999	-9999
1998	345	1500	2100	1800	285.75	6.38	-27.53	-9999	-27.605	-0.075	78.4872	-9999	-9999
1998	345	2100	2700	2400	285	5.855	-27.555	-9999	-27.6	-0.045	80.09	-9999	-9999
1998	345	2700	3300	3000	282.45	6.145	-27.41	-9999	-27.545	-0.135	80.3443	-9999	-9999
1998	345	4500	5100	4800	281.2	5.865	-27.245	-9999	-27.485	-0.24	261.8	-9999	-9999
1998	345	11700	12300	12000	279.6	6.575	-27.2	-9999	-27.435	-0.235	78.7027	-9999	-9999
1998	345	12300	12900	12600	279.45	6.71	-27.2	-9999	-27.41	-0.21	75.2771	-9999	-9999
1998	345	12900	13500	13200	282.4	6.605	-27.2	-9999	-27.45	-0.25	152.655	-9999	-9999
1998	345	13500	14100	13800	281.45	6.685	-27.2	-9999	-27.41	-0.21	384.055	-9999	-9999
1998	345	14100	14700	14400	279.85	6.97	-27.295	-9999	-27.51	-0.215	82.2822	-9999	-9999
1998	345	14700	15300	15000	280.95	6.72	-27.395	-9999	-27.685	-0.29	74.4146	-9999	-9999
1998	345	15300	15900	15600	282.2	6.12	-27.445	-9999	-27.74	-0.295	334.92	-9999	-9999
1998	345	15900	16500	16200	284.75	5.895	-27.495	-9999	-27.765	-0.27	90.25	-9999	-9999
1998	345	16500	17100	16800	288	5.615	-27.64	-9999	-27.875	-0.235	239.125	-9999	-9999
1998	345	17100	17700	17400	287.65	5.69	-27.74	-9999	-28.02	-0.28	82.3717	-9999	-9999
1998	345	18900	19500	19200	290.75	5.345	-28.075	-9999	-28.2	-0.125	113.528	-9999	-9999
1998	345	19500	20100	19800	291.05	4.93	-28.105	-9999	-28.28	-0.175	115.316	-9999	-9999
1998	345	20100	20700	20400	292.9	5.13	-28.2	-9999	-28.38	-0.18	108.182	-9999	-9999
1998	345	20700	21300	21000	294.95	5.235	-28.215	-9999	-28.375	-0.16	109.507	-9999	-9999
1998	345	21300	21900	21600	297.45	5.225	-28.33	-9999	-28.35	-0.02	111.672	-9999	-9999
1998	345	21900	22500	22200	298.6	4.95	-28.59	-9999	-28.57	0.02	118.667	-9999	-9999
1998	345	22500	23100	22800	299.9	4.9	-28.915	-9999	-28.86	0.055	123.309	-9999	-9999
1998	345	23100	23700	23400	301	4.815	-29.365	-9999	-29.165	0.2	129.158	-9999	-9999
1998	345	23700	24300	24000	300.7	4.88	-29.38	-9999	-29.23	0.15	138.407	-9999	-9999
1998	345	24300	24900	24600	298.25	5.395	-29.22	-9999	-29.2	0.02	142.9	-9999	-9999
1998	345	24900	25500	25200	299.15	5.52	-29.18	-9999	-29.175	0.005	149.97	-9999	-9999
1998	345	25500	26100	25800	295.8	6.08	-29.04	-9999	-28.99	0.05	134.185	-9999	-9999
1998	345	26100	26700	26400	293.5	5.975	-28.955	-9999	-29.005	-0.05	106.6	-9999	-9999
1998	345	26700	27300	27000	294.35	5.87	-29.095	-9999	-29.105	-0.01	98.9394	-9999	-9999
1998	345	27300	27900	27600	296.85	5.6	-29.425	-9999	-29.355	0.07	97.4074	-9999	-9999
1998	345	27900	28500	28200	299.1	5.545	-29.645	-9999	-29.535	0.11	109.55	-9999	-9999
1998	345	28500	29100	28800	296.85	5.565	-29.6	-9999	-29.485	0.115	113.182	-9999	-9999
1998	345	29100	29700	29400	296.2	5.85	-29.34	-9999	-29.285	0.055	101	-9999	-9999
1998	345	29700	30300	30000	296.85	5.49	-29.415	-9999	-29.46	-0.045	101	-9999	-9999
1998	345	30300	30900	30600	297.45	5.645	-29.295	-9999	-29.405	-0.11	108.758	-9999	-9999
1998	345	30900	31500	31200	296.3	5.705	-29.18	-9999	-29.31	-0.13	110.634	-9999	-9999
1998	345	31500	32100	31800	295.55	5.785	-28.94	-9999	-29.1	-0.16	107.455	-9999	-9999
1998	345	32100	32700	32400	295.25	5.72	-28.885	-9999	-28.995	-0.11	101.091	-9999	-9999
1998	345	32700	33300	33000	295.85	5.755	-28.96	-9999	-29.12	-0.16	95.5644	-9999	-9999
1998	345	33300	33900	33600	300.5	5.495	-29.21	-9999	-29.29	-0.08	95.32	-9999	-9999
1998	345	33900	34500	34200	301.6	5.405	-29.29	-9999	-29.32	-0.03	110.194	-9999	-9999
1998	345	34500	35100	34800	300.65	5.6	-29.175	-9999	-29.255	-0.08	110.495	-9999	-9999
1998	345	35100	35700	35400	298.75	5.85	-29.2	-9999	-29.235	-0.035	97.6533	-9999	-9999
1998	345	35700	36300	36000	299.85	5.555	-29.335	-9999	-29.405	-0.07	89.2419	-9999	-9999
1998	345	36300	36900	36600	301.55	5.665	-29.395	-9999	-29.42	-0.025	89.6238	-9999	-9999
1998	345	36900	37500	37200	301.05	5.85	-29.37	-9999	-29.4	-0.03	90.9067	-9999	-9999
1998	345	37500	38100	37800	299.05	6.04	-29.28	-9999	-29.345	-0.065	87.6093	-9999	-9999
1998	345	38100	38700	38400	300.15	6.005	-29.27	-9999	-29.345	-0.075	88.93	-9999	-9999
1998	345	38700	39300	39000	300.9	5.865	-29.275	-9999	-29.365	-0.09	91.8	-9999	-9999
1998	345	39300	39900	39600	300.6	5.98	-29.2	-9999	-29.27	-0.07	94.0134	-9999	-9999
1998	345	39900	40500	40200	300.15	6.06	-29.22	-9999	-29.29	-0.07	81.3205	-9999	-9999
1998	345	40500	41100	40800	301.25	5.92	-29.265	-9999	-29.3	-0.035	80.6985	-9999	-9999
1998	345	42300	42900	42600	302.5	6.005	-29.2	-9999	-29.28	-0.08	90.3366	-9999	-9999
1998	345	42900	43500	43200	302.15	6.01	-29.22	-9999	-29.265	-0.045	91.1774	-9999	-9999
1998	345	44700	45300	45000	303.8	5.34	-29.105	-9999	-29.18	-0.075	86.5556	-9999	-9999
1998	345	45300	45900	45600	305.6	5.19	-29.08	-9999	-29.125	-0.045	87.8381	-9999	-9999
1998	345	45900	46500	46200	305.65	5.495	-29.07	-9999	-29.1	-0.03	86.2021	-9999	-9999
1998	345	47700	48300	48000	303.75	5.615	-29.13	-9999	-29.2	-0.07	79.6585	-9999	-9999
1998	345	48300	48900	48600	301.1	5.645	-29.01	-9999	-29.1	-0.09	74.0408	-9999	-9999
1998	345	50100	50700	50400	300.05	6.115	-28.76	-9999	-28.935	-0.175	61.0619	-9999	-9999
1998	345	50700	51300	51000	302.2	5.995	-28.885	-9999	-29.03	-0.145	64.8948	-9999	-9999
1998	345	51300	51900	51600	302.7	6.26	-28.815	-9999	-29.025	-0.21	75.3617	-9999	-9999
1998	345	53100	53700	53400	301.85	6.585	-29.005	-9999	-29.215	-0.21	81.0843	-9999	-9999
1998	345	53700	54300	54000	303.65	6.2	-29.1	-9999	-29.32	-0.22	84.5155	-9999	-9999
1998	345	55500	56100	55800	304.95	5.91	-29.22	-9999	-29.37	-0.15	74.9661	-9999	-9999
1998	345	56100	56700	56400	304.55	6.045	-29.215	-9999	-29.415	-0.2	77.2967	-9999	-9999
1998	345	56700	57300	57000	303.45	6.06	-29.285	-9999	-29.445	-0.16	76.6813	-9999	-9999
1998	345	58500	59100	58800	307.25	5.985	-29.405	-9999	-29.545	-0.14	82.0166	-9999	-9999
1998	345	59100	59700	59400	309.2	5.785	-29.37	-9999	-29.54	-0.17	90.6284	-9999	-9999
1998	345	60900	61500	61200	302.55	6.39	-28.815	-9999	-29.015	-0.2	74.8387	-9999	-9999
1998	345	61500	62100	61800	301.15	6.65	-28.86	-9999	-29.09	-0.23	70.4758	-9999	-9999
1998	345	62100	62700	62400	301.05	6.31	-28.98	-9999	-29.175	-0.195	67.0339	-9999	-9999
1998	345	63900	64500	64200	312.5	5.675	-29.2	-9999	-29.4	-0.2	98.2394	-9999	-9999
1998	345	64500	65100	64800	313.1	5.955	-29.245	-9999	-29.4	-0.155	108.291	-9999	-9999
1998	345	66300	66900	66600	317.6	5.785	-29.48	-9999	-29.57	-0.09	98.6744	-9999	-9999
1998	345	66900	67500	67200	321.15	5.83	-29.49	-9999	-29.555	-0.065	108.506	-9999	-9999
1998	345	67500	68100	67800	322.35	5.675	-29.515	-9999	-29.5	0.015	108.349	-9999	-9999
1998	345	69300	69900	69600	321.7	4.995	-29.74	-9999	-29.815	-0.075	116.202	-9999	-9999
1998	345	69900	70500	70200	323.75	5.025	-29.865	-9999	-29.885	-0.02	122.467	-9999	-9999
1998	345	71700	72300	72000	327.1	4.755	-30.205	-9999	-30.23	-0.025	121.222	-9999	-9999
1998	345	72300	72900	72600	326.95	4.735	-30.355	-9999	-30.27	0.085	125.875	-9999	-9999
1998	345	72900	73500	73200	327.85	4.795	-30.16	-9999	-30.2	-0.04	128.169	-9999	-9999
1998	345	74700	75300	75000	331.25	4.67	-30.1	-9999	-30.27	-0.17	127.27	-9999	-9999
1998	345	75300	75900	75600	329.05	4.925	-30.04	-9999	-30.15	-0.11	138.538	-9999	-9999
1998	345	77100	77700	77400	337.05	4.675	-30.01	-9999	-30.13	-0.12	115.286	-9999	-9999
1998	345	77700	78300	78000	340.1	4.525	-30.085	-9999	-30.25	-0.165	119.663	-9999	-9999
1998	345	78300	78900	78600	341.55	4.8	-30	-9999	-30.19	-0.19	126.472	-9999	-9999
1998	345	80100	80700	80400	347.3	4.725	-30.25	-9999	-30.345	-0.095	193.76	-9999	-9999
1998	345	80700	81300	81000	343.65	4.58	-30.185	-9999	-30.395	-0.21	188.336	-9999	-9999
1998	345	82500	83100	82800	340.05	5.04	-30.22	-9999	-30.34	-0.12	178	-9999	-9999
1998	345	83100	83700	83400	341.4	4.73	-30.3	-9999	-30.325	-0.025	193.617	-9999	-9999
1998	345	83700	84300	84000	341.45	4.71	-30.36	-9999	-30.32	0.04	201.161	-9999	-9999
1998	345	85500	86100	85800	350.25	4.83	-30.265	-9999	-30.35	-0.085	205.688	-9999	-9999
1998	345	86100	86700	86400	354.667	4.68889	-30.3	-9999	-30.3389	-0.0388889	222.77	-9999	-9999
1998	346	1500	2100	1800	352.45	4.76	-30.45	-9999	-30.31	0.14	236.04	-9999	-9999
1998	346	2100	2700	2400	353.65	4.565	-30.51	-9999	-30.23	0.28	242.401	-9999	-9999
1998	346	2700	3300	3000	355.35	4.21	-30.395	-9999	-30.28	0.115	235.6	-9999	-9999
1998	346	4500	5100	4800	179.4	4.055	-30.3	-9999	-30.255	0.045	200.57	-9999	-9999
1998	346	5100	5700	5400	179.1	4.26	-30.095	-9999	-30.12	-0.025	196.201	-9999	-9999
1998	346	6900	7500	7200	6.35	4.37	-30.395	-9999	-30.115	0.28	217.308	-9999	-9999
1998	346	7500	8100	7800	5.55	4.715	-30.3	-9999	-30.08	0.22	223.823	-9999	-9999
1998	346	8100	8700	8400	1.55	4.835	-30.345	-9999	-29.995	0.35	221.586	-9999	-9999
1998	346	11700	12300	12000	5.45	4.93	-30.375	-9999	-30.19	0.185	203.143	-9999	-9999
1998	346	12300	12900	12600	4.15	4.885	-30.48	-9999	-30.205	0.275	211.618	-9999	-9999
1998	346	12900	13500	13200	3.35	4.82	-30.585	-9999	-30.3	0.285	224.077	-9999	-9999
1998	346	13500	14100	13800	5.15	5.05	-30.6	-9999	-30.28	0.32	245.583	-9999	-9999
1998	346	14100	14700	14400	7.35	5.095	-30.6	-9999	-30.3	0.3	267.618	-9999	-9999
1998	346	14700	15300	15000	9.55	4.89	-30.6	-9999	-30.385	0.215	282.044	-9999	-9999
1998	346	15300	15900	15600	10.2	4.735	-30.645	-9999	-30.445	0.2	293.833	-9999	-9999
1998	346	15900	16500	16200	7.65	4.545	-30.805	-9999	-30.6	0.205	308.591	-9999	-9999
1998	346	16500	17100	16800	10.35	4.385	-30.98	-9999	-30.735	0.245	317.708	-9999	-9999
1998	346	17100	17700	17400	14.65	4.34	-30.85	-9999	-30.715	0.135	314.176	-9999	-9999
1998	346	17700	18300	18000	14.7	4.58	-30.8	-9999	-30.675	0.125	311.211	-9999	-9999
1998	346	18300	18900	18600	12.85	4.765	-30.885	-9999	-30.67	0.215	307.232	-9999	-9999
1998	346	18900	19500	19200	15.45	4.805	-30.95	-9999	-30.77	0.18	314.26	-9999	-9999
1998	346	19500	20100	19800	19.15	4.61	-30.9	-9999	-30.8	0.1	322.698	-9999	-9999
1998	346	20100	20700	20400	17.8	4.795	-30.965	-9999	-30.8	0.165	302.881	-9999	-9999
1998	346	20700	21300	21000	16.45	4.8	-30.955	-9999	-30.805	0.15	304.6	-9999	-9999
1998	346	21300	21900	21600	13.55	4.76	-30.925	-9999	-30.86	0.065	303.121	-9999	-9999
1998	346	21900	22500	22200	9.05	4.675	-30.99	-9999	-30.89	0.1	290.53	-9999	-9999
1998	346	22500	23100	22800	9.05	4.53	-30.955	-9999	-30.885	0.07	280.24	-9999	-9999
1998	346	23100	23700	23400	9.85	4.61	-30.9	-9999	-30.82	0.08	276.55	-9999	-9999
1998	346	23700	24300	24000	8.85	4.675	-30.84	-9999	-30.81	0.03	262.868	-9999	-9999
1998	346	24300	24900	24600	4.2	4.6	-30.925	-9999	-30.89	0.035	256.88	-9999	-9999
1998	346	24900	25500	25200	2.35	4.52	-31.02	-9999	-30.95	0.07	256.503	-9999	-9999
1998	346	25500	26100	25800	2.05	4.595	-31.05	-9999	-31.07	-0.02	220.115	-9999	-9999
1998	346	26100	26700	26400	3.4	4.53	-30.955	-9999	-31	-0.045	206.372	-9999	-9999
1998	346	26700	27300	27000	4.3	4.22	-30.865	-9999	-30.985	-0.12	215.638	-9999	-9999
1998	346	27300	27900	27600	2.1	4.095	-30.735	-9999	-30.865	-0.13	209.77	-9999	-9999
1998	346	27900	28500	28200	4.65	3.925	-30.78	-9999	-30.875	-0.095	202.332	-9999	-9999
1998	346	28500	29100	28800	7.25	3.815	-30.91	-9999	-30.955	-0.045	204.389	-9999	-9999
1998	346	29100	29700	29400	7.45	3.79	-30.8	-9999	-30.945	-0.145	175.779	-9999	-9999
1998	346	29700	30300	30000	12.9	3.655	-30.74	-9999	-30.965	-0.225	171.533	-9999	-9999
1998	346	30300	30900	30600	15.4	3.945	-30.59	-9999	-30.845	-0.255	181.625	-9999	-9999
1998	346	30900	31500	31200	15.15	4.13	-30.55	-9999	-30.72	-0.17	170.487	-9999	-9999
1998	346	31500	32100	31800	17.7	4.25	-30.585	-9999	-30.75	-0.165	158.133	-9999	-9999
1998	346	32100	32700	32400	18.55	4.195	-30.575	-9999	-30.7	-0.125	173.304	-9999	-9999
1998	346	32700	33300	33000	20.75	4.095	-30.75	-9999	-30.805	-0.055	177.212	-9999	-9999
1998	346	33300	33900	33600	19.6	3.865	-30.81	-9999	-30.84	-0.03	185.76	-9999	-9999
1998	346	33900	34500	34200	18.4	3.845	-30.78	-9999	-30.8	-0.02	191.411	-9999	-9999
1998	346	34500	35100	34800	23.7	3.73	-30.795	-9999	-30.865	-0.07	201.284	-9999	-9999
1998	346	35100	35700	35400	26.8	3.635	-30.8	-9999	-30.895	-0.095	213.97	-9999	-9999
1998	346	35700	36300	36000	26.5	3.58	-30.75	-9999	-30.875	-0.125	226.018	-9999	-9999
1998	346	36300	36900	36600	26.7	3.55	-30.82	-9999	-30.885	-0.065	225.61	-9999	-9999
1998	346	36900	37500	37200	25.1	3.805	-30.715	-9999	-30.8	-0.085	220.924	-9999	-9999
1998	346	37500	38100	37800	26.15	3.815	-30.67	-9999	-30.79	-0.12	231.143	-9999	-9999
1998	346	38100	38700	38400	29	3.815	-30.7	-9999	-30.8	-0.1	232.151	-9999	-9999
1998	346	38700	39300	39000	27.1	3.935	-30.88	-9999	-30.895	-0.015	241.233	-9999	-9999
1998	346	39300	39900	39600	27.35	3.84	-30.92	-9999	-30.815	0.105	251.952	-9999	-9999
1998	346	39900	40500	40200	30.3	3.645	-30.965	-9999	-30.8	0.165	253.404	-9999	-9999
1998	346	40500	41100	40800	28.65	3.735	-30.985	-9999	-30.775	0.21	255.4	-9999	-9999
1998	346	42300	42900	42600	26.75	3.935	-31.37	-9999	-31	0.37	272.629	-9999	-9999
1998	346	42900	43500	43200	23	3.96	-31.295	-9999	-30.94	0.355	269.215	-9999	-9999
1998	346	44700	45300	45000	12.45	3.905	-31.01	-9999	-30.89	0.12	245.462	-9999	-9999
1998	346	45300	45900	45600	10.95	3.93	-30.975	-9999	-30.875	0.1	238.477	-9999	-9999
1998	346	45900	46500	46200	11.9	4.23	-30.935	-9999	-30.865	0.07	242.897	-9999	-9999
1998	346	47700	48300	48000	8.65	4.055	-30.91	-9999	-30.825	0.085	264.249	-9999	-9999
1998	346	48300	48900	48600	9.6	3.91	-30.835	-9999	-30.8	0.035	268.493	-9999	-9999
1998	346	50100	50700	50400	13.1	4.325	-30.8	-9999	-30.6	0.2	253.019	-9999	-9999
1998	346	50700	51300	51000	16.15	4.515	-30.735	-9999	-30.46	0.275	247.522	-9999	-9999
1998	346	51300	51900	51600	16.8	4.495	-30.7	-9999	-30.41	0.29	244.252	-9999	-9999
1998	346	53100	53700	53400	17.25	4.505	-30.74	-9999	-30.645	0.095	241.603	-9999	-9999
1998	346	53700	54300	54000	16.4	4.325	-30.745	-9999	-30.69	0.055	244.624	-9999	-9999
1998	346	55500	56100	55800	12.2	4.22	-30.79	-9999	-30.775	0.015	238.485	-9999	-9999
1998	346	56100	56700	56400	12.7	4.145	-30.8	-9999	-30.71	0.09	246.482	-9999	-9999
1998	346	56700	57300	57000	13.65	4.185	-30.81	-9999	-30.575	0.235	253.657	-9999	-9999
1998	346	58500	59100	58800	17.95	4.075	-30.79	-9999	-30.565	0.225	248.021	-9999	-9999
1998	346	59100	59700	59400	21.15	4.18	-30.71	-9999	-30.505	0.205	257.304	-9999	-9999
1998	346	60900	61500	61200	11.95	4.66	-30.475	-9999	-30.37	0.105	203.744	-9999	-9999
1998	346	61500	62100	61800	14.15	4.52	-30.545	-9999	-30.53	0.015	215.888	-9999	-9999
1998	346	62100	62700	62400	16.55	4.325	-30.645	-9999	-30.64	0.005	233.326	-9999	-9999
1998	346	63900	64500	64200	12.45	4.355	-30.875	-9999	-30.65	0.225	242.116	-9999	-9999
1998	346	64500	65100	64800	10.55	3.97	-30.845	-9999	-30.7	0.145	254.435	-9999	-9999
1998	346	66300	66900	66600	10.3	3.805	-30.945	-9999	-30.64	0.305	270.303	-9999	-9999
1998	346	66900	67500	67200	12.7	3.64	-30.955	-9999	-30.56	0.395	277.462	-9999	-9999
1998	346	67500	68100	67800	14.6	3.385	-30.9	-9999	-30.525	0.375	289.317	-9999	-9999
1998	346	69300	69900	69600	19.75	3.54	-30.555	-9999	-30.45	0.105	277	-9999	-9999
1998	346	69900	70500	70200	20.85	3.61	-30.695	-9999	-30.385	0.31	297.286	-9999	-9999
1998	346	71700	72300	72000	24.4	3.68	-30.59	-9999	-30.18	0.41	288	-9999	-9999
1998	346	72300	72900	72600	24.1	3.745	-30.65	-9999	-30.385	0.265	294.047	-9999	-9999
1998	346	72900	73500	73200	18	4.085	-30.6	-9999	-30.225	0.375	297.983	-9999	-9999
1998	346	74700	75300	75000	9	4.33	-30.565	-9999	-30.145	0.42	296.464	-9999	-9999
1998	346	75300	75900	75600	9.55	4.245	-30.6	-9999	-30.105	0.495	301.241	-9999	-9999
1998	346	77100	77700	77400	6.25	3.965	-30.6	-9999	-30.165	0.435	304.574	-9999	-9999
1998	346	77700	78300	78000	6.65	3.785	-30.675	-9999	-30.265	0.41	312.42	-9999	-9999
1998	346	78300	78900	78600	20.75	3.66	-30.71	-9999	-30.165	0.545	315.25	-9999	-9999
1998	346	80100	80700	80400	475.8	2.60714	-30.7143	-9999	-30.1857	0.528571	304.387	-9999	-9999
1998	346	80700	81300	81000	143.8	3.425	-30.67	-9999	-29.99	0.68	299.134	-9999	-9999
1998	346	82500	83100	82800	2.7	3.61	-30.565	-9999	-29.945	0.62	319.454	-9999	-9999
1998	346	83100	83700	83400	3.8	3.36	-30.5	-9999	-29.945	0.555	323.669	-9999	-9999
1998	346	83700	84300	84000	4.7	3.465	-30.755	-9999	-30	0.755	327.364	-9999	-9999
1998	346	85500	86100	85800	4.8	3.59	-30.735	-9999	-29.67	1.065	316.565	-9999	-9999
1998	346	86100	86700	86400	4.72222	3.49444	-30.5111	-9999	-29.6056	0.905556	319.762	-9999	-9999
1998	347	1500	2100	1800	179.8	2.89	-29.015	-9999	-28.99	0.025	311.653	-9999	-9999
1998	347	2100	2700	2400	109.2	2.585	-28.56	-9999	-28.655	-0.095	312.155	-9999	-9999
1998	347	2700	3300	3000	339.9	3.04	-28.09	-9999	-28.265	-0.175	279.412	-9999	-9999
1998	347	4500	5100	4800	338.15	4.315	-27.98	-9999	-28.16	-0.18	124.514	-9999	-9999
1998	347	5100	5700	5400	233.05	4.03	-28.09	-9999	-28.265	-0.175	140.99	-9999	-9999
1998	347	6900	7500	7200	350.8	4.42	-28.155	-9999	-28.305	-0.15	139.902	-9999	-9999
1998	347	7500	8100	7800	351.4	4.935	-28.265	-9999	-28.46	-0.195	136.808	-9999	-9999
1998	347	8100	8700	8400	351.1	4.52	-28.47	-9999	-28.64	-0.17	139.5	-9999	-9999
1998	347	11100	11700	11400	352.15	4.565	-28.835	-9999	-28.815	0.02	208.76	-9999	-9999
1998	347	11700	12300	12000	355.1	4.34	-28.905	-9999	-28.905	0	220.767	-9999	-9999
1998	347	12300	12900	12600	355.45	4.33	-29.035	-9999	-29	0.035	224.372	-9999	-9999
1998	347	12900	13500	13200	353.95	4.74	-29.155	-9999	-29.1	0.055	225.866	-9999	-9999
1998	347	13500	14100	13800	352.8	4.845	-29.42	-9999	-29.18	0.24	254.402	-9999	-9999
1998	347	14100	14700	14400	354.05	4.77	-29.64	-9999	-29.27	0.37	274.236	-9999	-9999
1998	347	14700	15300	15000	354.15	4.745	-29.76	-9999	-29.41	0.35	267.97	-9999	-9999
1998	347	15300	15900	15600	354.3	4.59	-29.755	-9999	-29.335	0.42	268.39	-9999	-9999
1998	347	15900	16500	16200	354.95	4.685	-29.68	-9999	-29.29	0.39	276.617	-9999	-9999
1998	347	16500	17100	16800	356.65	4.72	-29.72	-9999	-29.34	0.38	273.976	-9999	-9999
1998	347	17100	17700	17400	233.05	4.705	-29.945	-9999	-29.3	0.645	283.63	-9999	-9999
1998	347	17700	18300	18000	0.35	4.785	-29.935	-9999	-29.3	0.635	290.85	-9999	-9999
1998	347	18300	18900	18600	0.6	4.84	-29.99	-9999	-29.31	0.68	281.695	-9999	-9999
1998	347	18900	19500	19200	90.2	4.81	-29.96	-9999	-29.255	0.705	285.45	-9999	-9999
1998	347	19500	20100	19800	357.85	4.97	-29.905	-9999	-29.12	0.785	280.241	-9999	-9999
1998	347	20100	20700	20400	161.75	5.205	-29.8	-9999	-29	0.8	265.52	-9999	-9999
1998	347	20700	21300	21000	125.8	5.235	-29.84	-9999	-29.125	0.715	261.266	-9999	-9999
1998	347	21300	21900	21600	356.8	5.24	-29.8	-9999	-29.165	0.635	254.684	-9999	-9999
1998	347	21900	22500	22200	354.75	5.13	-29.805	-9999	-29.23	0.575	230.76	-9999	-9999
1998	347	22500	23100	22800	353.95	5.025	-29.805	-9999	-29.215	0.59	225.867	-9999	-9999
1998	347	23100	23700	23400	355.65	4.845	-29.88	-9999	-29.33	0.55	236.075	-9999	-9999
1998	347	23700	24300	24000	353.8	4.925	-29.745	-9999	-29.295	0.45	240.44	-9999	-9999
1998	347	24300	24900	24600	355.6	4.915	-29.765	-9999	-29.29	0.475	245.267	-9999	-9999
1998	347	24900	25500	25200	354.9	4.84	-29.875	-9999	-29.32	0.555	263.1	-9999	-9999
1998	347	25500	26100	25800	353.8	4.93	-29.815	-9999	-29.305	0.51	244.857	-9999	-9999
1998	347	26700	27300	27000	354.65	4.66	-29.795	-9999	-29.625	0.17	250.333	-9999	-9999
1998	347	27300	27900	27600	352.15	4.535	-29.595	-9999	-29.595	0	228.886	-9999	-9999
1998	347	27900	28500	28200	350.2	5.09	-29.32	-9999	-29.365	-0.045	216.977	-9999	-9999
1998	347	28500	29100	28800	350.25	5.085	-29.2	-9999	-29.29	-0.09	214.945	-9999	-9999
1998	347	29100	29700	29400	353.25	4.915	-29.365	-9999	-29.27	0.095	228.265	-9999	-9999
1998	347	29700	30300	30000	355.15	4.865	-29.52	-9999	-29.345	0.175	233.741	-9999	-9999
1998	347	30300	30900	30600	356.65	4.88	-29.655	-9999	-29.41	0.245	238.175	-9999	-9999
1998	347	30900	31500	31200	357.95	4.76	-29.8	-9999	-29.415	0.385	238.313	-9999	-9999
1998	347	31500	32100	31800	358.55	4.825	-29.735	-9999	-29.305	0.43	234.103	-9999	-9999
1998	347	32100	32700	32400	359	4.67	-29.71	-9999	-29.31	0.4	243.08	-9999	-9999
1998	347	32700	33300	33000	161.85	4.69	-29.725	-9999	-29.3	0.425	260	-9999	-9999
1998	347	33300	33900	33600	0.85	4.685	-29.825	-9999	-29.375	0.45	249.64	-9999	-9999
1998	347	33900	34500	34200	90.1	4.74	-29.965	-9999	-29.585	0.38	255.94	-9999	-9999
1998	347	34500	35100	34800	358.6	4.79	-29.95	-9999	-29.615	0.335	242.048	-9999	-9999
1998	347	35100	35700	35400	357.2	4.96	-29.57	-9999	-29.385	0.185	233.06	-9999	-9999
1998	347	35700	36300	36000	355.55	5.08	-29.735	-9999	-29.43	0.305	227.147	-9999	-9999
1998	347	36300	36900	36600	354.35	4.97	-29.855	-9999	-29.615	0.24	225.277	-9999	-9999
1998	347	36900	37500	37200	356.75	4.81	-29.905	-9999	-29.71	0.195	226.113	-9999	-9999
1998	347	37500	38100	37800	357.15	4.61	-30.025	-9999	-29.75	0.275	224.916	-9999	-9999
1998	347	38100	38700	38400	355.15	4.425	-30.015	-9999	-29.785	0.23	217.903	-9999	-9999
1998	347	38700	39300	39000	352.9	4.635	-29.825	-9999	-29.68	0.145	192.518	-9999	-9999
1998	347	39300	39900	39600	355.15	4.815	-29.835	-9999	-29.7	0.135	184	-9999	-9999
1998	347	39900	40500	40200	351.9	4.92	-29.885	-9999	-29.72	0.165	183.199	-9999	-9999
1998	347	40500	41100	40800	355.1	4.77	-29.935	-9999	-29.735	0.2	187.429	-9999	-9999
1998	347	42300	42900	42600	353.6	5.035	-29.8	-9999	-29.47	0.33	174.602	-9999	-9999
1998	347	42900	43500	43200	356	4.82	-29.895	-9999	-29.6	0.295	175.343	-9999	-9999
1998	347	44700	45300	45000	357.7	4.89	-29.875	-9999	-29.6	0.275	166.313	-9999	-9999
1998	347	45300	45900	45600	358.8	4.995	-29.915	-9999	-29.7	0.215	167.53	-9999	-9999
1998	347	45900	46500	46200	215.45	5.105	-30.05	-9999	-29.81	0.24	165.788	-9999	-9999
1998	347	47700	48300	48000	339.75	4.625	-29.855	-9999	-29.885	-0.03	161.214	-9999	-9999
1998	347	48300	48900	48600	36.55	4.545	-30.24	-9999	-30.005	0.235	164.515	-9999	-9999
1998	347	74100	74700	74400	14.05	3.8	-30.45	-9999	-30.325	0.125	169	-9999	-9999
1998	347	75300	75900	75600	22.6	3.54	-30.645	-9999	-30.52	0.125	230.609	-9999	-9999
1998	347	75900	76500	76200	20.35	3.58	-30.68	-9999	-30.5	0.18	229.389	-9999	-9999
1998	347	76500	77100	76800	18.25	3.86	-30.7	-9999	-30.44	0.26	216.106	-9999	-9999
1998	347	77100	77700	77400	17	3.725	-30.7	-9999	-30.47	0.23	217.826	-9999	-9999
1998	347	77700	78300	78000	14.2	3.745	-30.705	-9999	-30.535	0.17	206.676	-9999	-9999
1998	347	78300	78900	78600	15.25	3.875	-30.775	-9999	-30.545	0.23	211.85	-9999	-9999
1998	347	78900	79500	79200	15.25	3.905	-30.72	-9999	-30.595	0.125	218.783	-9999	-9999
1998	347	79500	80100	79800	14.05	3.935	-30.7	-9999	-30.61	0.09	202.568	-9999	-9999
1998	347	80100	80700	80400	16.15	4.03	-30.765	-9999	-30.595	0.17	201.9	-9999	-9999
1998	347	80700	81300	81000	19.4	3.98	-30.79	-9999	-30.545	0.245	200.652	-9999	-9999
1998	347	81300	81900	81600	19.5	4.09	-30.8	-9999	-30.585	0.215	206.081	-9999	-9999
1998	347	81900	82500	82200	17.15	4.175	-30.875	-9999	-30.565	0.31	201.95	-9999	-9999
1998	347	82500	83100	82800	14.05	4.215	-30.845	-9999	-30.59	0.255	225.217	-9999	-9999
1998	347	84300	84900	84600	18.95	4.235	-30.96	-9999	-30.53	0.43	193.186	-9999	-9999
1998	347	84900	85500	85200	20.5	4.265	-30.965	-9999	-30.6	0.365	197.456	-9999	-9999
1998	347	85500	86100	85800	20.2	4.135	-30.9	-9999	-30.6	0.3	194	-9999	-9999
1998	348	900	1500	1200	24.05	4.18	-30.82	-9999	-30.84	-0.02	190.536	-9999	-9999
1998	348	1500	2100	1800	27.5	4.335	-30.845	-9999	-30.735	0.11	194.5	-9999	-9999
1998	348	3300	3900	3600	27.7	4.36	-30.875	-9999	-30.7	0.175	213	-9999	-9999
1998	348	3900	4500	4200	28.15	4.46	-30.8	-9999	-30.645	0.155	204.488	-9999	-9999
1998	348	4500	5100	4800	27.55	4.705	-30.8	-9999	-30.6	0.2	200.203	-9999	-9999
1998	348	5100	5700	5400	125.05	4.56667	-30.775	-9999	-30.6	0.175	199.373	-9999	-9999
1998	348	5700	6300	6000	27.35	4.615	-30.74	-9999	-30.62	0.12	195.093	-9999	-9999
1998	348	6300	6900	6600	25.6	4.695	-30.71	-9999	-30.59	0.12	183.803	-9999	-9999
1998	348	6900	7500	7200	27.65	4.685	-30.635	-9999	-30.56	0.075	186.449	-9999	-9999
1998	348	8100	8700	8400	30.65	4.475	-30.7	-9999	-30.6	0.1	206.798	-9999	-9999
1998	348	8700	9300	9000	30.15	4.54	-30.695	-9999	-30.6	0.095	207.152	-9999	-9999
1998	348	9300	9900	9600	32.35	4.685	-30.695	-9999	-30.6	0.095	207.935	-9999	-9999
1998	348	9900	10500	10200	33.15	4.67	-30.7	-9999	-30.59	0.11	209.487	-9999	-9999
1998	348	10500	11100	10800	32.45	4.56	-30.745	-9999	-30.65	0.095	216.478	-9999	-9999
1998	348	11100	11700	11400	31.95	4.34	-30.775	-9999	-30.695	0.08	212.714	-9999	-9999
1998	348	11700	12300	12000	34.25	4.495	-30.735	-9999	-30.675	0.06	287.706	-9999	-9999
1998	348	12300	12900	12600	32.15	4.62	-30.715	-9999	-30.575	0.14	286.478	-9999	-9999
1998	348	12900	13500	13200	30.15	4.71	-30.625	-9999	-30.5	0.125	270.459	-9999	-9999
1998	348	13500	14100	13800	28.2	4.77	-30.6	-9999	-30.455	0.145	260.05	-9999	-9999
1998	348	14100	14700	14400	28.9	4.86	-30.515	-9999	-30.4	0.115	258.957	-9999	-9999
1998	348	14700	15300	15000	30.65	4.735	-30.585	-9999	-30.475	0.11	263.892	-9999	-9999
1998	348	15300	15900	15600	30.9	4.7	-30.595	-9999	-30.5	0.095	260.7	-9999	-9999
1998	348	15900	16500	16200	31.7	4.66	-30.585	-9999	-30.495	0.09	268.957	-9999	-9999
1998	348	16500	17100	16800	31.35	4.76	-30.575	-9999	-30.45	0.125	247.299	-9999	-9999
1998	348	17100	17700	17400	31.75	4.885	-30.51	-9999	-30.39	0.12	223.914	-9999	-9999
1998	348	17700	18300	18000	31.05	4.815	-30.5	-9999	-30.395	0.105	230	-9999	-9999
1998	348	18300	18900	18600	30.75	4.72	-30.5	-9999	-30.355	0.145	225.375	-9999	-9999
1998	348	18900	19500	19200	31.4	4.695	-30.49	-9999	-30.39	0.1	217.473	-9999	-9999
1998	348	19500	20100	19800	30.85	4.565	-30.485	-9999	-30.4	0.085	218.439	-9999	-9999
1998	348	20100	20700	20400	32	4.685	-30.43	-9999	-30.355	0.075	220.415	-9999	-9999
1998	348	20700	21300	21000	32.05	4.67	-30.44	-9999	-30.34	0.1	220.113	-9999	-9999
1998	348	21300	21900	21600	31.8	4.755	-30.4	-9999	-30.3	0.1	225.653	-9999	-9999
1998	348	21900	22500	22200	31.25	4.835	-30.4	-9999	-30.3	0.1	220.892	-9999	-9999
1998	348	22500	23100	22800	31.05	4.775	-30.4	-9999	-30.315	0.085	218.847	-9999	-9999
1998	348	23100	23700	23400	30.25	4.755	-30.4	-9999	-30.365	0.035	227.029	-9999	-9999
1998	348	23700	24300	24000	29.45	4.715	-30.395	-9999	-30.31	0.085	224.949	-9999	-9999
1998	348	24300	24900	24600	28.35	4.62	-30.385	-9999	-30.3	0.085	223.187	-9999	-9999
1998	348	24900	25500	25200	28.05	4.77	-30.325	-9999	-30.235	0.09	224.344	-9999	-9999
1998	348	25500	26100	25800	28.5	4.77	-30.3	-9999	-30.2	0.1	222.464	-9999	-9999
1998	348	26100	26700	26400	27.4	4.7	-30.3	-9999	-30.195	0.105	218.598	-9999	-9999
1998	348	26700	27300	27000	27.65	4.67	-30.26	-9999	-30.16	0.1	215.233	-9999	-9999
1998	348	27300	27900	27600	26.9	4.535	-30.29	-9999	-30.205	0.085	210.217	-9999	-9999
1998	348	27900	28500	28200	25.95	4.45	-30.275	-9999	-30.2	0.075	215.48	-9999	-9999
1998	348	28500	29100	28800	26.5	4.455	-30.21	-9999	-30.2	0.01	215.621	-9999	-9999
1998	348	29100	29700	29400	26.8	4.415	-30.2	-9999	-30.2	0	220.543	-9999	-9999
1998	348	29700	30300	30000	28.2	4.505	-30.205	-9999	-30.19	0.015	226.28	-9999	-9999
1998	348	30300	30900	30600	28.55	4.555	-30.255	-9999	-30.205	0.05	231.483	-9999	-9999
1998	348	30900	31500	31200	28.7	4.49	-30.295	-9999	-30.265	0.03	236.174	-9999	-9999
1998	348	31500	32100	31800	28	4.59	-30.285	-9999	-30.2	0.085	231.24	-9999	-9999
1998	348	32100	32700	32400	26.5	4.55	-30.22	-9999	-30.19	0.03	237.069	-9999	-9999
1998	348	32700	33300	33000	26.1	4.65	-30.28	-9999	-30.22	0.06	221.978	-9999	-9999
1998	348	33300	33900	33600	23.9	4.695	-30.005	-9999	-30.005	0	220	-9999	-9999
1998	348	33900	34500	34200	22.35	4.62	-30.1	-9999	-30.1	0	222.724	-9999	-9999
1998	348	34500	35100	34800	22.25	4.36	-30.16	-9999	-30.1	0.06	224.951	-9999	-9999
1998	348	35100	35700	35400	21.4	4.325	-30.1	-9999	-30.005	0.095	218.591	-9999	-9999
1998	348	35700	36300	36000	22.25	4.455	-30.075	-9999	-29.98	0.095	219.069	-9999	-9999
1998	348	36300	36900	36600	23.7	4.37	-30	-9999	-29.97	0.03	220.902	-9999	-9999
1998	348	36900	37500	37200	25.3	4.56	-30.085	-9999	-30.04	0.045	222.853	-9999	-9999
1998	348	37500	38100	37800	25.45	4.745	-30.1	-9999	-29.94	0.16	226.963	-9999	-9999
1998	348	38100	38700	38400	25.45	4.705	-30.005	-9999	-29.875	0.13	216.843	-9999	-9999
1998	348	38700	39300	39000	25.25	4.68	-29.975	-9999	-29.845	0.13	208.267	-9999	-9999
1998	348	39300	39900	39600	25.2	4.74	-29.9	-9999	-29.8	0.1	208	-9999	-9999
1998	348	74700	75300	75000	21.75	3.705	-29.7	-9999	-29.635	0.065	170.285	-9999	-9999
1998	348	75300	75900	75600	22.05	3.81	-29.66	-9999	-29.6	0.06	168.569	-9999	-9999
1998	348	75900	76500	76200	22	3.59	-29.735	-9999	-29.59	0.145	166.542	-9999	-9999
1998	348	76500	77100	76800	23.7	3.45	-29.805	-9999	-29.63	0.175	165.807	-9999	-9999
1998	348	77100	77700	77400	21.95	3.28	-29.9	-9999	-29.745	0.155	173.675	-9999	-9999
1998	348	77700	78300	78000	22.65	3.3	-29.9	-9999	-29.7	0.2	167.613	-9999	-9999
1998	348	78300	78900	78600	25.25	3.42	-29.825	-9999	-29.7	0.125	170.713	-9999	-9999
1998	348	78900	79500	79200	25.05	3.22	-29.8	-9999	-29.71	0.09	172.675	-9999	-9999
1998	348	79500	80100	79800	24.35	3.245	-29.725	-9999	-29.605	0.12	173.545	-9999	-9999
1998	348	80100	80700	80400	26.75	3	-29.7	-9999	-29.585	0.115	172.06	-9999	-9999
1998	348	80700	81300	81000	26.55	3.27	-29.7	-9999	-29.505	0.195	174.239	-9999	-9999
1998	348	81300	81900	81600	26.95	3.605	-29.8	-9999	-29.655	0.145	183.881	-9999	-9999
1998	348	81900	82500	82200	28.15	3.16	-29.935	-9999	-29.615	0.32	190.9	-9999	-9999
1998	348	82500	83100	82800	26.05	3.145	-30.005	-9999	-29.705	0.3	193.19	-9999	-9999
1998	348	84300	84900	84600	28.25	3.425	-29.925	-9999	-29.525	0.4	206.713	-9999	-9999
1998	348	84900	85500	85200	29.15	3.145	-29.955	-9999	-29.6	0.355	206.96	-9999	-9999
1998	348	85500	86100	85800	27.15	2.665	-29.88	-9999	-29.52	0.36	201.391	-9999	-9999
1998	349	900	1500	1200	31.75	3.005	-29.865	-9999	-29.75	0.115	214.773	-9999	-9999
1998	349	1500	2100	1800	30.65	3.175	-29.865	-9999	-29.58	0.285	218.229	-9999	-9999
1998	349	4500	5100	4800	30.8	2.765	-29.825	-9999	-29.615	0.21	257.704	-9999	-9999
1998	349	5100	5700	5400	29.95	2.645	-29.795	-9999	-29.48	0.315	229.171	-9999	-9999
1998	349	5700	6300	6000	31.65	2.71	-29.735	-9999	-29.425	0.31	217.146	-9999	-9999
1998	349	6300	6900	6600	32.8	2.72	-29.75	-9999	-29.465	0.285	214.39	-9999	-9999
1998	349	6900	7500	7200	33.65	2.765	-29.77	-9999	-29.415	0.355	227.977	-9999	-9999
1998	349	7500	8100	7800	33.85	2.565	-29.765	-9999	-29.445	0.32	229.17	-9999	-9999
1998	349	8100	8700	8400	35.55	2.59	-29.79	-9999	-29.5	0.29	228.93	-9999	-9999
1998	349	8700	9300	9000	37.85	2.885	-29.845	-9999	-29.575	0.27	232.705	-9999	-9999
1998	349	9300	9900	9600	37.25	2.895	-29.855	-9999	-29.6	0.255	255.374	-9999	-9999
1998	349	9900	10500	10200	34.9	2.74	-29.765	-9999	-29.55	0.215	255.552	-9999	-9999
1998	349	11700	12300	12000	43.65	2.995	-29.93	-9999	-29.575	0.355	239.8	-9999	-9999
1998	349	12300	12900	12600	41.55	3.31	-29.9	-9999	-29.52	0.38	250.538	-9999	-9999
1998	349	12900	13500	13200	39.15	3.2	-29.9	-9999	-29.595	0.305	243.25	-9999	-9999
1998	349	14700	15300	15000	33.25	3.32	-29.775	-9999	-29.6	0.175	255.116	-9999	-9999
1998	349	15300	15900	15600	31.5	3.255	-29.765	-9999	-29.61	0.155	241.48	-9999	-9999
1998	349	15900	16500	16200	30.75	3.485	-29.725	-9999	-29.555	0.17	242.817	-9999	-9999
1998	349	16500	17100	16800	29.75	3.405	-29.635	-9999	-29.5	0.135	233.314	-9999	-9999
1998	349	17100	17700	17400	30.4	3.075	-29.61	-9999	-29.5	0.11	227.43	-9999	-9999
1998	349	17700	18300	18000	32.4	2.97	-29.6	-9999	-29.49	0.11	229.214	-9999	-9999
1998	349	18300	18900	18600	34.25	2.965	-29.6	-9999	-29.465	0.135	224.201	-9999	-9999
1998	349	18900	19500	19200	32.4	3.075	-29.58	-9999	-29.475	0.105	223.68	-9999	-9999
1998	349	19500	20100	19800	36.6	2.905	-29.6	-9999	-29.455	0.145	228.87	-9999	-9999
1998	349	20100	20700	20400	36.05	2.725	-29.56	-9999	-29.4	0.16	223.862	-9999	-9999
1998	349	20700	21300	21000	34.8	2.84	-29.57	-9999	-29.4	0.17	213.877	-9999	-9999
1998	349	21300	21900	21600	35.45	2.79	-29.6	-9999	-29.41	0.19	221.417	-9999	-9999
1998	349	21900	22500	22200	37.1	2.875	-29.56	-9999	-29.38	0.18	222.17	-9999	-9999
1998	349	22500	23100	22800	35.05	2.89	-29.6	-9999	-29.495	0.105	221.467	-9999	-9999
1998	349	23100	23700	23400	33.95	2.885	-29.6	-9999	-29.5	0.1	224.101	-9999	-9999
1998	349	23700	24300	24000	34.65	2.985	-29.59	-9999	-29.5	0.09	220.485	-9999	-9999
1998	349	24300	24900	24600	33.3	3	-29.57	-9999	-29.48	0.09	222.8	-9999	-9999
1998	349	24900	25500	25200	32.4	3.205	-29.51	-9999	-29.455	0.055	226.215	-9999	-9999
1998	349	25500	26100	25800	29.3	3.355	-29.4	-9999	-29.4	0	220.96	-9999	-9999
1998	349	26100	26700	26400	28.2	3.455	-29.37	-9999	-29.4	-0.03	216.383	-9999	-9999
1998	349	26700	27300	27000	27.15	3.355	-29.365	-9999	-29.39	-0.025	219.392	-9999	-9999
1998	349	27300	27900	27600	22.75	3.445	-29.305	-9999	-29.38	-0.075	204.733	-9999	-9999
1998	349	27900	28500	28200	22.2	3.185	-29.4	-9999	-29.4	0	210.683	-9999	-9999
1998	349	28500	29100	28800	19.9	3.175	-29.395	-9999	-29.345	0.05	217.127	-9999	-9999
1998	349	29100	29700	29400	18.55	3.345	-29.3	-9999	-29.295	0.005	214.381	-9999	-9999
1998	349	29700	30300	30000	17.55	3.725	-29.225	-9999	-29.235	-0.01	203.512	-9999	-9999
1998	349	30300	30900	30600	17.85	3.66	-29.225	-9999	-29.31	-0.085	207.835	-9999	-9999
1998	349	30900	31500	31200	16.2	3.78	-29.3	-9999	-29.29	0.01	202.833	-9999	-9999
1998	349	31500	32100	31800	17.3	3.955	-29.3	-9999	-29.21	0.09	204.32	-9999	-9999
1998	349	32100	32700	32400	16.9	4.21	-29.25	-9999	-29.185	0.065	205.24	-9999	-9999
1998	349	32700	33300	33000	19.9	4.085	-29.225	-9999	-29.14	0.085	215.866	-9999	-9999
1998	349	33300	33900	33600	20	4.015	-29.2	-9999	-29.115	0.085	218.4	-9999	-9999
1998	349	33900	34500	34200	21.3	3.745	-29.245	-9999	-29.27	-0.025	217.048	-9999	-9999
1998	349	34500	35100	34800	21.75	3.63	-29.35	-9999	-29.38	-0.03	216.12	-9999	-9999
1998	349	35100	35700	35400	19.2	3.805	-29.34	-9999	-29.28	0.06	214.727	-9999	-9999
1998	349	35700	36300	36000	20.5	3.905	-29.27	-9999	-29.195	0.075	219.07	-9999	-9999
1998	349	36300	36900	36600	20.45	3.795	-29.225	-9999	-29.2	0.025	232.088	-9999	-9999
1998	349	36900	37500	37200	17.6	3.685	-29.2	-9999	-29.2	0	229.853	-9999	-9999
1998	349	37500	38100	37800	16.3	3.6	-29.2	-9999	-29.235	-0.035	230.945	-9999	-9999
1998	349	38100	38700	38400	16.95	3.825	-29.18	-9999	-29.235	-0.055	221.964	-9999	-9999
1998	349	38700	39300	39000	18.5	3.595	-29.2	-9999	-29.21	-0.01	224.166	-9999	-9999
1998	349	39300	39900	39600	19.25	3.48	-29.165	-9999	-29.2	-0.035	226.588	-9999	-9999
1998	349	41100	41700	41400	19.45	3.215	-29.2	-9999	-29.18	0.02	232.634	-9999	-9999
1998	349	41700	42300	42000	20.9	3.485	-29.2	-9999	-29.2	0	228.658	-9999	-9999
1998	349	42300	42900	42600	20.65	3.69	-29.285	-9999	-29.2	0.085	235.25	-9999	-9999
1998	349	44100	44700	44400	14.65	4.065	-28.99	-9999	-29.05	-0.06	214.698	-9999	-9999
1998	349	44700	45300	45000	14.95	4.15	-29.125	-9999	-29.225	-0.1	217.832	-9999	-9999
1998	349	46500	47100	46800	18.35	4.175	-29.12	-9999	-29.15	-0.03	223	-9999	-9999
1998	349	47100	47700	47400	20.8	4.255	-29.305	-9999	-29.205	0.1	220.092	-9999	-9999
1998	349	47700	48300	48000	20.2	3.845	-29.475	-9999	-29.4	0.075	224.341	-9999	-9999
1998	349	49500	50100	49800	15.2	3.97	-28.545	-9999	-28.885	-0.34	201.094	-9999	-9999
1998	349	50100	50700	50400	9.75	4.19	-28.54	-9999	-28.835	-0.295	196.082	-9999	-9999
1998	349	51900	52500	52200	14.25	3.78	-28.525	-9999	-28.89	-0.365	226	-9999	-9999
1998	349	52500	53100	52800	18	3.55	-28.675	-9999	-28.995	-0.32	224.489	-9999	-9999
1998	349	53100	53700	53400	17.55	4.015	-28.61	-9999	-28.945	-0.335	222.529	-9999	-9999
1998	349	54900	55500	55200	14.25	4.45	-28.465	-9999	-28.78	-0.315	203.965	-9999	-9999
1998	349	55500	56100	55800	15.8	4.23	-28.545	-9999	-28.88	-0.335	207.346	-9999	-9999
1998	349	57300	57900	57600	13.7	4.675	-28.685	-9999	-28.925	-0.24	242.371	-9999	-9999
1998	349	57900	58500	58200	15.4	4.435	-28.695	-9999	-28.92	-0.225	239.492	-9999	-9999
1998	349	58500	59100	58800	15.7	4.075	-28.7	-9999	-29.045	-0.345	237.25	-9999	-9999
1998	349	60300	60900	60600	18.05	4.24	-28.695	-9999	-28.99	-0.295	227.805	-9999	-9999
1998	349	60900	61500	61200	18.85	4.12	-28.75	-9999	-29.065	-0.315	230.021	-9999	-9999
1998	349	62700	63300	63000	21.5	3.935	-28.785	-9999	-29.065	-0.28	235.92	-9999	-9999
1998	349	63300	63900	63600	18.95	3.99	-28.8	-9999	-29.055	-0.255	233.3	-9999	-9999
1998	349	63900	64500	64200	19.65	4.08	-28.85	-9999	-29.015	-0.165	232.189	-9999	-9999
1998	349	65700	66300	66000	23.25	3.86	-28.925	-9999	-28.98	-0.055	234.401	-9999	-9999
1998	349	66300	66900	66600	20.5	3.84	-29.01	-9999	-29.025	-0.015	241.191	-9999	-9999
1998	349	68100	68700	68400	17.65	3.74	-28.96	-9999	-28.9	0.06	240.293	-9999	-9999
1998	349	68700	69300	69000	14.5	3.88	-28.945	-9999	-28.89	0.055	244.644	-9999	-9999
1998	349	69300	69900	69600	11.25	3.74	-28.955	-9999	-28.965	-0.01	250.87	-9999	-9999
1998	349	71100	71700	71400	14.45	3.955	-28.93	-9999	-28.92	0.01	250.191	-9999	-9999
1998	349	71700	72300	72000	13.05	3.87	-28.955	-9999	-28.925	0.03	250.869	-9999	-9999
1998	349	73500	74100	73800	16.5	3.735	-29	-9999	-29.1	-0.1	234.228	-9999	-9999
1998	349	74100	74700	74400	16.5	3.63	-28.96	-9999	-29.055	-0.095	240.715	-9999	-9999
1998	349	74700	75300	75000	15.35	3.615	-29	-9999	-29.005	-0.005	228.438	-9999	-9999
1998	349	76500	77100	76800	15.6	3.675	-29.085	-9999	-29.08	0.005	222.444	-9999	-9999
1998	349	77100	77700	77400	13.55	3.89	-28.995	-9999	-28.99	0.005	220.833	-9999	-9999
1998	349	78900	79500	79200	13.7	3.91	-29.015	-9999	-29.08	-0.065	206.765	-9999	-9999
1998	349	79500	80100	79800	15.05	4.01	-29.255	-9999	-29.125	0.13	207.699	-9999	-9999
1998	349	80100	80700	80400	19	4.025	-29.35	-9999	-28.985	0.365	208	-9999	-9999
1998	349	81900	82500	82200	21.9	3.93	-29.09	-9999	-28.825	0.265	206.697	-9999	-9999
1998	349	82500	83100	82800	23.35	3.915	-29.09	-9999	-28.89	0.2	208.479	-9999	-9999
1998	349	84300	84900	84600	19	4.03	-29.22	-9999	-28.985	0.235	208.371	-9999	-9999
1998	349	84900	85500	85200	23.35	3.825	-29.23	-9999	-29.03	0.2	215.599	-9999	-9999
1998	349	85500	86100	85800	26.85	3.66	-29.295	-9999	-29.025	0.27	220	-9999	-9999
1998	350	900	1500	1200	26.95	4.13	-29.005	-9999	-29.1	-0.095	210.764	-9999	-9999
1998	350	1500	2100	1800	23.25	4.015	-29.1	-9999	-29.025	0.075	218.229	-9999	-9999
1998	350	5700	6300	6000	13.35	4.285	-29.08	-9999	-28.93	0.15	237	-9999	-9999
1998	350	6300	6900	6600	65.05	3.96	-29.06	-9999	-29.055	0.005	198.478	-9999	-9999
1998	350	6900	7500	7200	56.1	3.71	-29.33	-9999	-29.23	0.1	195.304	-9999	-9999
1998	350	7500	8100	7800	72.45	3.4	-29.435	-9999	-29.23	0.205	218.646	-9999	-9999
1998	350	8100	8700	8400	6.45	3.06	-29.33	-9999	-29.205	0.125	241.88	-9999	-9999
1998	350	8700	9300	9000	11.2	3.025	-29.065	-9999	-29.215	-0.15	245.682	-9999	-9999
1998	350	9300	9900	9600	7.65	3.285	-28.9	-9999	-29.17	-0.27	237.65	-9999	-9999
1998	350	9900	10500	10200	7.3	3.415	-28.88	-9999	-29.125	-0.245	217.76	-9999	-9999
1998	350	10500	11100	10800	4.75	3.42	-29.09	-9999	-29.215	-0.125	208.075	-9999	-9999
1998	350	11100	11700	11400	179.45	3.125	-29.28	-9999	-29.21	0.07	222.718	-9999	-9999
1998	350	11700	12300	12000	9.45	3.1	-29.39	-9999	-29.23	0.16	224.6	-9999	-9999
1998	350	12300	12900	12600	19.35	3.21	-29.605	-9999	-29.15	0.455	224.318	-9999	-9999
1998	350	14700	15300	15000	23.85	3.76	-29.1	-9999	-28.99	0.11	252.6	-9999	-9999
1998	350	15300	15900	15600	24.3	4.045	-29.065	-9999	-28.98	0.085	235.382	-9999	-9999
1998	350	15900	16500	16200	27.95	4.05	-29	-9999	-28.935	0.065	223.782	-9999	-9999
1998	350	16500	17100	16800	28.95	3.85	-28.985	-9999	-28.955	0.03	238.891	-9999	-9999
1998	350	17100	17700	17400	27.05	3.795	-28.9	-9999	-28.935	-0.035	243.867	-9999	-9999
1998	350	17700	18300	18000	25.45	3.86	-28.875	-9999	-28.845	0.03	248.371	-9999	-9999
1998	350	18300	18900	18600	24.35	3.91	-28.76	-9999	-28.8	-0.04	234.255	-9999	-9999
1998	350	18900	19500	19200	22.15	4.02	-28.785	-9999	-28.8	-0.015	226.6	-9999	-9999
1998	350	19500	20100	19800	25	3.925	-28.665	-9999	-28.715	-0.05	222.286	-9999	-9999
1998	350	20100	20700	20400	28.15	3.97	-28.6	-9999	-28.71	-0.11	211.927	-9999	-9999
1998	350	20700	21300	21000	26.95	3.71	-28.555	-9999	-28.69	-0.135	205.467	-9999	-9999
1998	350	21300	21900	21600	23.5	3.755	-28.5	-9999	-28.625	-0.125	206.4	-9999	-9999
1998	350	21900	22500	22200	29.6	3.66	-28.555	-9999	-28.65	-0.095	208.164	-9999	-9999
1998	350	22500	23100	22800	28.4	3.575	-28.55	-9999	-28.69	-0.14	215.182	-9999	-9999
1998	350	23100	23700	23400	27.9	3.72	-28.61	-9999	-28.78	-0.17	217.538	-9999	-9999
1998	350	23700	24300	24000	34.5	3.79	-28.685	-9999	-28.775	-0.09	211.467	-9999	-9999
1998	350	24300	24900	24600	39.05	4.04	-28.625	-9999	-28.695	-0.07	207.897	-9999	-9999
1998	350	24900	25500	25200	33	3.905	-28.565	-9999	-28.62	-0.055	214.115	-9999	-9999
1998	350	25500	26100	25800	19.25	3.845	-28.455	-9999	-28.6	-0.145	219.209	-9999	-9999
1998	350	26100	26700	26400	19.9	4.245	-28.465	-9999	-28.6	-0.135	219.047	-9999	-9999
1998	350	26700	27300	27000	20.95	4.175	-28.585	-9999	-28.6	-0.015	230.38	-9999	-9999
1998	350	27300	27900	27600	23.55	4.14	-28.51	-9999	-28.585	-0.075	237.587	-9999	-9999
1998	350	27900	28500	28200	18.85	4.24	-28.4	-9999	-28.525	-0.125	231.93	-9999	-9999
1998	350	28500	29100	28800	12.05	4.145	-28.485	-9999	-28.685	-0.2	241.589	-9999	-9999
1998	350	29100	29700	29400	15.05	4.02	-28.53	-9999	-28.705	-0.175	250.954	-9999	-9999
1998	350	29700	30300	30000	16.3	4.235	-28.53	-9999	-28.66	-0.13	249.413	-9999	-9999
1998	350	30300	30900	30600	17.5	4.33	-28.41	-9999	-28.44	-0.03	238.654	-9999	-9999
1998	350	30900	31500	31200	17.4	4.505	-28.355	-9999	-28.42	-0.065	223.26	-9999	-9999
1998	350	31500	32100	31800	9.55	4.895	-28.18	-9999	-28.31	-0.13	194.02	-9999	-9999
1998	350	32100	32700	32400	11.95	5.075	-28.165	-9999	-28.36	-0.195	201.831	-9999	-9999
1998	350	32700	33300	33000	199.95	4.945	-28.045	-9999	-28.355	-0.31	194.385	-9999	-9999
1998	350	33300	33900	33600	249.35	5.11	-27.975	-9999	-28.275	-0.3	209.025	-9999	-9999
1998	350	33900	34500	34200	355.3	5.135	-27.8	-9999	-28.005	-0.205	198.099	-9999	-9999
1998	350	34500	35100	34800	213.85	4.92	-27.63	-9999	-27.875	-0.245	163.713	-9999	-9999
1998	350	35100	35700	35400	250.3	4.75	-27.5	-9999	-27.81	-0.31	155.36	-9999	-9999
1998	350	35700	36300	36000	162.2	4.565	-27.48	-9999	-27.8	-0.32	153.18	-9999	-9999
1998	350	36300	36900	36600	232.3	4.81	-27.4	-9999	-27.72	-0.32	160.757	-9999	-9999
1998	350	36900	37500	37200	232.45	4.59	-27.34	-9999	-27.6	-0.26	154.667	-9999	-9999
1998	350	37500	38100	37800	73.75	5.005	-27.255	-9999	-27.55	-0.295	162.663	-9999	-9999
1998	350	38100	38700	38400	3	4.865	-27.235	-9999	-27.6	-0.365	166.375	-9999	-9999
1998	350	38700	39300	39000	4.05	5.005	-27.205	-9999	-27.535	-0.33	177.765	-9999	-9999
1998	350	39300	39900	39600	57.3	5.15	-27.095	-9999	-27.365	-0.27	180.311	-9999	-9999
1998	350	41100	41700	41400	93.05	4.85	-26.98	-9999	-27.3	-0.32	141.512	-9999	-9999
1998	350	41700	42300	42000	3.3	4.925	-26.92	-9999	-27.245	-0.325	141.983	-9999	-9999
1998	350	42300	42900	42600	6.1	4.53	-26.835	-9999	-27.105	-0.27	140	-9999	-9999
1998	350	44100	44700	44400	144.7	4.57	-26.665	-9999	-26.975	-0.31	103.552	-9999	-9999
1998	350	44700	45300	45000	92.95	4.505	-26.62	-9999	-26.9	-0.28	104.188	-9999	-9999
1998	350	46500	47100	46800	319.65	4.86	-26.5	-9999	-26.8	-0.3	112.667	-9999	-9999
1998	350	47100	47700	47400	355.15	4.95	-26.495	-9999	-26.765	-0.27	116.255	-9999	-9999
1998	350	47700	48300	48000	284.6	5.02	-26.395	-9999	-26.645	-0.25	119	-9999	-9999
1998	350	49500	50100	49800	351.15	4.675	-26.24	-9999	-26.555	-0.315	105.159	-9999	-9999
1998	350	50100	50700	50400	347	4.855	-26.215	-9999	-26.495	-0.28	186.942	-9999	-9999
1998	350	51900	52500	52200	347.75	4.445	-26.045	-9999	-26.375	-0.33	103.533	-9999	-9999
1998	350	52500	53100	52800	345.2	4.585	-25.935	-9999	-26.275	-0.34	98.2705	-9999	-9999
1998	350	53100	53700	53400	345.25	4.745	-25.855	-9999	-26.19	-0.335	92	-9999	-9999
1998	350	54900	55500	55200	339.3	4.195	-25.865	-9999	-26.185	-0.32	82.966	-9999	-9999
1998	350	55500	56100	55800	344.75	5.025	-25.81	-9999	-26.08	-0.27	86.0469	-9999	-9999
1998	350	57300	57900	57600	327.8	4.375	-25.77	-9999	-26.095	-0.325	79.7939	-9999	-9999
1998	350	57900	58500	58200	336.2	3.965	-25.7	-9999	-25.995	-0.295	82.5533	-9999	-9999
1998	350	58500	59100	58800	334.9	4.02	-25.625	-9999	-25.945	-0.32	79	-9999	-9999
1998	350	60300	60900	60600	336.35	4.415	-25.6	-9999	-25.905	-0.305	72.3186	-9999	-9999
1998	350	60900	61500	61200	336.4	4.55	-25.575	-9999	-25.865	-0.29	71.1045	-9999	-9999
1998	350	62700	63300	63000	334.9	4.07	-25.49	-9999	-25.85	-0.36	70.7612	-9999	-9999
1998	350	63300	63900	63600	327.45	4.195	-25.465	-9999	-25.785	-0.32	67.9666	-9999	-9999
1998	350	63900	64500	64200	328.35	4.275	-25.43	-9999	-25.77	-0.34	68	-9999	-9999
1998	350	65700	66300	66000	323.55	4.08	-25.34	-9999	-25.735	-0.395	72	-9999	-9999
1998	350	66300	66900	66600	331.65	3.375	-25.275	-9999	-25.615	-0.34	74.7273	-9999	-9999
1998	350	68100	68700	68400	338.1	3.03	-24.96	-9999	-25.215	-0.255	72.1648	-9999	-9999
1998	350	68700	69300	69000	336.35	3.535	-24.91	-9999	-25.185	-0.275	72.2788	-9999	-9999
1998	350	69300	69900	69600	336.55	3.735	-24.9	-9999	-25.255	-0.355	73	-9999	-9999
1998	350	71100	71700	71400	319.9	3.32	-24.77	-9999	-25.015	-0.245	52.1043	-9999	-9999
1998	350	71700	72300	72000	322.65	3.16	-24.705	-9999	-24.98	-0.275	48.4923	-9999	-9999
1998	350	73500	74100	73800	322.95	3.77	-24.635	-9999	-24.98	-0.345	65	-9999	-9999
1998	350	74100	74700	74400	322.3	3.38	-24.64	-9999	-24.92	-0.28	64.3456	-9999	-9999
1998	350	74700	75300	75000	318.5	3.605	-24.685	-9999	-24.905	-0.22	69	-9999	-9999
1998	350	76500	77100	76800	324.1	2.735	-24.455	-9999	-24.74	-0.285	64.4138	-9999	-9999
1998	350	77100	77700	77400	311.05	2.605	-24.37	-9999	-24.665	-0.295	53.125	-9999	-9999
1998	350	78900	79500	79200	318.2	2.605	-24.22	-9999	-24.5	-0.28	48.6961	-9999	-9999
1998	350	79500	80100	79800	322.7	2.515	-24.19	-9999	-24.425	-0.235	52.0584	-9999	-9999
1998	350	80100	80700	80400	317.5	2.71	-24.2	-9999	-24.44	-0.24	52	-9999	-9999
1998	350	81900	82500	82200	328.85	2.485	-24.16	-9999	-24.445	-0.285	51	-9999	-9999
1998	350	82500	83100	82800	325.15	2.58	-24.085	-9999	-24.41	-0.325	51.1905	-9999	-9999
1998	350	84300	84900	84600	326.5	3.095	-24	-9999	-24.295	-0.295	51.3333	-9999	-9999
1998	350	84900	85500	85200	326.8	3.14	-23.945	-9999	-24.2	-0.255	55.7	-9999	-9999
1998	350	85500	86100	85800	328.25	3.755	-23.92	-9999	-24.195	-0.275	58	-9999	-9999
1998	351	900	1500	1200	318.95	3.19	-23.88	-9999	-24.18	-0.3	48.4619	-9999	-9999
1998	351	1500	2100	1800	315.1	2.88	-23.84	-9999	-24.155	-0.315	51.5825	-9999	-9999
1998	351	3300	3900	3600	309.7	2.405	-23.785	-9999	-24.02	-0.235	45.449	-9999	-9999
1998	351	3900	4500	4200	308	3.005	-23.8	-9999	-24.01	-0.21	39.8627	-9999	-9999
1998	351	5700	6300	6000	293.65	2.825	-23.705	-9999	-24	-0.295	52.8784	-9999	-9999
1998	351	6300	6900	6600	295.7	2.655	-23.705	-9999	-24	-0.295	41.72	-9999	-9999
1998	351	6900	7500	7200	291.75	2.22	-23.7	-9999	-24	-0.3	41.9474	-9999	-9999
1998	351	7500	8100	7800	293.75	2.265	-23.7	-9999	-23.945	-0.245	48.2013	-9999	-9999
1998	351	8100	8700	8400	300.05	2.24	-23.63	-9999	-23.915	-0.285	47.3867	-9999	-9999
1998	351	8700	9300	9000	297.2	1.915	-23.68	-9999	-23.905	-0.225	49	-9999	-9999
1998	351	9300	9900	9600	307.55	1.65	-23.64	-9999	-23.9	-0.26	46.2215	-9999	-9999
1998	351	9900	10500	10200	309.55	1.77	-23.595	-9999	-23.835	-0.24	49.08	-9999	-9999
1998	351	10500	11100	10800	315.2	1.865	-23.6	-9999	-23.8	-0.2	46.6774	-9999	-9999
1998	351	11100	11700	11400	314.95	1.67	-23.58	-9999	-23.875	-0.295	53.1933	-9999	-9999
1998	351	11700	12300	12000	310.05	2.055	-23.62	-9999	-23.94	-0.32	49.7209	-9999	-9999
1998	351	12300	12900	12600	308.45	1.775	-23.64	-9999	-23.93	-0.29	49.1579	-9999	-9999
1998	351	12900	13500	13200	305.6	1.86	-23.575	-9999	-23.92	-0.345	46.7143	-9999	-9999
1998	351	13500	14100	13800	303.1	1.795	-23.575	-9999	-23.875	-0.3	50.6667	-9999	-9999
1998	351	14100	14700	14400	312.6	1.745	-23.54	-9999	-23.805	-0.265	52.0164	-9999	-9999
1998	351	14700	15300	15000	319.5	1.59	-23.46	-9999	-23.74	-0.28	53.8908	-9999	-9999
1998	351	15300	15900	15600	323.6	1.405	-23.405	-9999	-23.7	-0.295	56.3043	-9999	-9999
1998	351	15900	16500	16200	322.4	1.565	-23.43	-9999	-23.705	-0.275	54.902	-9999	-9999
1998	351	16500	17100	16800	314.5	1.515	-23.48	-9999	-23.715	-0.235	56.7475	-9999	-9999
1998	351	17100	17700	17400	300.85	1.545	-23.525	-9999	-23.785	-0.26	54.38	-9999	-9999
1998	351	17700	18300	18000	301.25	1.81	-23.53	-9999	-23.8	-0.27	55.549	-9999	-9999
1998	351	18300	18900	18600	301.25	1.98	-23.515	-9999	-23.79	-0.275	55.1717	-9999	-9999
1998	351	18900	19500	19200	298.35	2.105	-23.505	-9999	-23.79	-0.285	56.04	-9999	-9999
1998	351	19500	20100	19800	292.9	2.265	-23.49	-9999	-23.81	-0.32	58.3529	-9999	-9999
1998	351	20100	20700	20400	293.1	2.455	-23.505	-9999	-23.8	-0.295	54.4705	-9999	-9999
1998	351	20700	21300	21000	292.85	2.285	-23.455	-9999	-23.795	-0.34	61.9834	-9999	-9999
1998	351	21300	21900	21600	296	2.105	-23.45	-9999	-23.73	-0.28	59.1569	-9999	-9999
1998	351	21900	22500	22200	294.4	2.065	-23.4	-9999	-23.665	-0.265	58.5413	-9999	-9999
1998	351	22500	23100	22800	289.9	1.94	-23.345	-9999	-23.6	-0.255	51.6233	-9999	-9999
1998	351	23100	23700	23400	292.65	1.45	-23.325	-9999	-23.595	-0.27	55.3681	-9999	-9999
1998	351	23700	24300	24000	325.7	0.96	-23.21	-9999	-23.41	-0.2	58.3153	-9999	-9999
1998	351	24300	24900	24600	136.8	1.46	-23.205	-9999	-23.37	-0.165	62.1067	-9999	-9999
1998	351	24900	25500	25200	106.75	1.61	-23.13	-9999	-23.32	-0.19	65.4951	-9999	-9999
1998	351	27300	27900	27600	282.2	1.88	-23.21	-9999	-23.52	-0.31	69.335	-9999	-9999
1998	351	27900	28500	28200	282.1	2.165	-23.19	-9999	-23.48	-0.29	71.65	-9999	-9999
1998	351	28500	29100	28800	280.15	1.865	-23.13	-9999	-23.455	-0.325	65.3981	-9999	-9999
1998	351	29100	29700	29400	275.1	2.19	-23.135	-9999	-23.4	-0.265	64.0678	-9999	-9999
1998	351	29700	30300	30000	271.5	2.235	-23.11	-9999	-23.395	-0.285	64.0365	-9999	-9999
1998	351	30300	30900	30600	279.25	1.935	-23.08	-9999	-23.365	-0.285	64.4175	-9999	-9999
1998	351	30900	31500	31200	282.1	1.945	-23.07	-9999	-23.325	-0.255	63.8136	-9999	-9999
1998	351	31500	32100	31800	275.65	1.81	-23.02	-9999	-23.3	-0.28	57.2667	-9999	-9999
1998	351	32100	32700	32400	272.65	2.105	-23.06	-9999	-23.27	-0.21	63.5161	-9999	-9999
1998	351	32700	33300	33000	276.95	1.71	-23.045	-9999	-23.205	-0.16	67.0678	-9999	-9999
1998	351	33300	33900	33600	269.05	1.69	-22.91	-9999	-23.14	-0.23	66.7895	-9999	-9999
1998	351	33900	34500	34200	267.1	2.005	-22.885	-9999	-23.2	-0.315	306.5	-9999	-9999
1998	351	34500	35100	34800	273.9	1.795	-22.9	-9999	-23.165	-0.265	296.043	-9999	-9999
1998	351	35100	35700	35400	281.45	1.6	-22.9	-9999	-23.195	-0.295	67.2333	-9999	-9999
1998	351	35700	36300	36000	280.1	1.87	-22.86	-9999	-23.105	-0.245	66.5484	-9999	-9999
1998	351	36300	36900	36600	279.9	1.73	-22.84	-9999	-23.1	-0.26	69.8644	-9999	-9999
1998	351	36900	37500	37200	270.25	2.055	-22.85	-9999	-23.1	-0.25	70	-9999	-9999
1998	351	37500	38100	37800	274.8	1.64	-22.81	-9999	-23.035	-0.225	71.2258	-9999	-9999
1998	351	38100	38700	38400	266.1	1.685	-22.775	-9999	-22.975	-0.2	73.253	-9999	-9999
1998	351	38700	39300	39000	254.05	1.34	-22.685	-9999	-22.835	-0.15	194.199	-9999	-9999
1998	351	39300	39900	39600	244.95	1.86	-22.645	-9999	-22.72	-0.075	178	-9999	-9999
1998	351	41100	41700	41400	256.15	1.055	-22.52	-9999	-22.72	-0.2	66.2456	-9999	-9999
1998	351	41700	42300	42000	247.4	2.02	-22.48	-9999	-22.735	-0.255	57.8998	-9999	-9999
1998	351	42300	42900	42600	246.35	2.15	-22.465	-9999	-22.685	-0.22	49	-9999	-9999
1998	351	44100	44700	44400	235.4	1.59	-22.28	-9999	-22.46	-0.18	119.401	-9999	-9999
1998	351	44700	45300	45000	233.6	1.275	-22.135	-9999	-22.325	-0.19	198.893	-9999	-9999
1998	351	46500	47100	46800	205.55	0.965	-22.065	-9999	-22.26	-0.195	55.2329	-9999	-9999
1998	351	47100	47700	47400	160.2	0.835	-22.085	-9999	-22.38	-0.295	58.788	-9999	-9999
1998	351	47700	48300	48000	190	0.655	-21.91	-9999	-22.275	-0.365	62	-9999	-9999
1998	351	49500	50100	49800	256.7	1.445	-22.395	-9999	-22.595	-0.2	56.4949	-9999	-9999
1998	351	50100	50700	50400	249.6	1.38	-22.325	-9999	-22.465	-0.14	57.3922	-9999	-9999
1998	351	51900	52500	52200	244.7	1.43	-22.13	-9999	-22.275	-0.145	288.5	-9999	-9999
1998	351	52500	53100	52800	246.95	1.66	-22.175	-9999	-22.375	-0.2	107.381	-9999	-9999
1998	351	53100	53700	53400	208.75	1.105	-21.945	-9999	-22.13	-0.185	56	-9999	-9999
1998	351	54900	55500	55200	190.8	1.22	-21.765	-9999	-22.055	-0.29	54.0067	-9999	-9999
1998	351	55500	56100	55800	189.75	1.13	-21.72	-9999	-22.01	-0.29	48.0265	-9999	-9999
1998	351	57300	57900	57600	228.95	1.14	-21.79	-9999	-22.02	-0.23	59.289	-9999	-9999
1998	351	57900	58500	58200	229.45	1.14	-21.835	-9999	-22.03	-0.195	118.354	-9999	-9999
1998	351	59700	60300	60000	209.85	0.745	-21.55	-9999	-21.86	-0.31	52	-9999	-9999
1998	351	60300	60900	60600	195.6	1.17	-21.545	-9999	-21.885	-0.34	52.5042	-9999	-9999
1998	351	60900	61500	61200	193.7	1.125	-21.565	-9999	-21.88	-0.315	52.5973	-9999	-9999
1998	351	62700	63300	63000	195.95	1.49	-21.505	-9999	-21.815	-0.31	58.7705	-9999	-9999
1998	351	63300	63900	63600	196.55	1.72	-21.565	-9999	-21.87	-0.305	59.0168	-9999	-9999
1998	351	65100	65700	65400	185.15	2.265	-21.5	-9999	-21.855	-0.355	69	-9999	-9999
1998	351	65700	66300	66000	173.6	2.105	-21.48	-9999	-21.89	-0.41	70.08	-9999	-9999
1998	351	66300	66900	66600	166.75	2.885	-21.5	-9999	-21.91	-0.41	57.3288	-9999	-9999
1998	351	68100	68700	68400	141.7	4.33	-21.4	-9999	-21.855	-0.455	44.0547	-9999	-9999
1998	351	68700	69300	69000	150.25	3.315	-21.455	-9999	-21.9	-0.445	51.5093	-9999	-9999
1998	351	70500	71100	70800	145.05	3.925	-21.675	-9999	-22.19	-0.515	44	-9999	-9999
1998	351	71100	71700	71400	145.9	4.295	-21.76	-9999	-22.18	-0.42	33.4658	-9999	-9999
1998	351	71700	72300	72000	151	3.435	-21.71	-9999	-22.15	-0.44	23.338	-9999	-9999
1998	351	73500	74100	73800	149.05	3.07	-21.92	-9999	-22.365	-0.445	16.3038	-9999	-9999
1998	351	74100	74700	74400	132.1	4.02	-22.21	-9999	-22.465	-0.255	17.9932	-9999	-9999
1998	351	75900	76500	76200	144.95	3.39	-22.255	-9999	-22.69	-0.435	18	-9999	-9999
1998	351	76500	77100	76800	142.05	4.085	-22.37	-9999	-22.79	-0.42	19.6928	-9999	-9999
1998	351	77100	77700	77400	116.85	3.355	-22.65	-9999	-22.9	-0.25	18.4468	-9999	-9999
1998	351	78900	79500	79200	118.8	3.995	-22.915	-9999	-23.14	-0.225	21.0561	-9999	-9999
1998	351	79500	80100	79800	135.9	3.125	-22.925	-9999	-23.285	-0.36	19.9326	-9999	-9999
1998	351	81300	81900	81600	123.15	3.165	-23.08	-9999	-23.37	-0.29	19	-9999	-9999
1998	351	81900	82500	82200	131.55	2.18	-23.04	-9999	-23.355	-0.315	11.4272	-9999	-9999
1998	351	84300	84900	84600	149.9	2.83	-22.83	-9999	-23.335	-0.505	39.8764	-9999	-9999
1998	351	84900	85500	85200	160.2	2.68	-22.87	-9999	-23.345	-0.475	18.9058	-9999	-9999
1998	352	300	900	600	136.2	3.145	-23.06	-9999	-23.375	-0.315	28	-9999	-9999
1998	352	900	1500	1200	141.45	2.375	-22.93	-9999	-23.325	-0.395	27.4124	-9999	-9999
1998	352	1500	2100	1800	148.25	1.895	-22.83	-9999	-23.25	-0.42	18.6716	-9999	-9999
1998	352	3300	3900	3600	153.9	2.285	-22.685	-9999	-23.18	-0.495	31.9277	-9999	-9999
1998	352	3900	4500	4200	151.55	3.33	-22.755	-9999	-23.35	-0.595	27.0775	-9999	-9999
1998	352	17100	17700	17400	200.3	2.835	-25.485	-9999	-25.225	0.26	303	-9999	-9999
1998	352	19500	20100	19800	189.65	3.815	-25.33	-9999	-25.225	0.105	281	-9999	-9999
1998	352	20100	20700	20400	185.2	3.285	-25.735	-9999	-25.3	0.435	289.201	-9999	-9999
1998	352	20700	21300	21000	185.25	3.26	-25.775	-9999	-25.145	0.63	302.261	-9999	-9999
1998	352	21300	21900	21600	184.7	3.015	-25.78	-9999	-25.005	0.775	332.387	-9999	-9999
1998	352	21900	22500	22200	177.1	2.3	-25.765	-9999	-24.945	0.82	325.633	-9999	-9999
1998	352	22500	23100	22800	172.3	2.945	-25.745	-9999	-24.705	1.04	340.714	-9999	-9999
1998	352	23100	23700	23400	168.45	2.775	-25.81	-9999	-24.625	1.185	351.26	-9999	-9999
1998	352	23700	24300	24000	146.25	1.535	-26.1	-9999	-25.29	0.81	382.547	-9999	-9999
1998	352	24300	24900	24600	141.1	1.855	-26.13	-9999	-25.485	0.645	385.236	-9999	-9999
1998	352	24900	25500	25200	136	2.685	-25.86	-9999	-25.3	0.56	392.847	-9999	-9999
1998	352	25500	26100	25800	132.8	2.295	-26.83	-9999	-25.275	1.555	439.343	-9999	-9999
1998	352	26100	26700	26400	137.4	3.065	-26.455	-9999	-25.435	1.02	413.682	-9999	-9999
1998	352	26700	27300	27000	138	3.015	-26.465	-9999	-25.765	0.7	414.731	-9999	-9999
1998	352	27300	27900	27600	135.1	2.81	-27.025	-9999	-26.045	0.98	408.98	-9999	-9999
1998	352	27900	28500	28200	133.05	2.46	-27.285	-9999	-26.29	0.995	413.781	-9999	-9999
1998	352	28500	29100	28800	133.1	2.305	-27.435	-9999	-26.405	1.03	424.6	-9999	-9999
1998	352	29100	29700	29400	132.25	2.3	-27.455	-9999	-26.46	0.995	418.483	-9999	-9999
1998	352	29700	30300	30000	130.3	2.29	-27.44	-9999	-26.5	0.94	401.438	-9999	-9999
1998	352	30300	30900	30600	130.25	2.035	-27.285	-9999	-26.625	0.66	414.4	-9999	-9999
1998	352	30900	31500	31200	132.1	2.29	-27.365	-9999	-26.62	0.745	445.448	-9999	-9999
1998	352	31500	32100	31800	133.4	2.335	-27.065	-9999	-26.485	0.58	522.125	-9999	-9999
1998	352	32100	32700	32400	133.3	2.675	-26.695	-9999	-26.545	0.15	534	-9999	-9999
1998	352	32700	33300	33000	130.7	3.2	-26.565	-9999	-26.385	0.18	463.649	-9999	-9999
1998	352	33300	33900	33600	128.35	2.845	-26.505	-9999	-26.26	0.245	442.6	-9999	-9999
1998	352	33900	34500	34200	119.25	2.465	-26.78	-9999	-26.3	0.48	440.107	-9999	-9999
1998	352	34500	35100	34800	105.85	2.345	-27.16	-9999	-26.31	0.85	450.778	-9999	-9999
1998	352	35100	35700	35400	104.1	2.43	-27.3	-9999	-26.265	1.035	420.434	-9999	-9999
1998	352	35700	36300	36000	102.7	2.315	-27.035	-9999	-26.285	0.75	427.495	-9999	-9999
1998	352	36300	36900	36600	89.5	2.405	-26.575	-9999	-26.235	0.34	459.873	-9999	-9999
1998	352	36900	37500	37200	76.5	1.765	-26.135	-9999	-26.28	-0.145	453.906	-9999	-9999
1998	352	37500	38100	37800	54.15	0.88	-26.11	-9999	-26.325	-0.215	438.06	-9999	-9999
1998	352	38100	38700	38400	217.65	0.43	-26.1	-9999	-26.245	-0.145	430.206	-9999	-9999
1998	352	38700	39300	39000	166.9	0.725	-26.02	-9999	-26.195	-0.175	419.623	-9999	-9999
1998	352	39300	39900	39600	161	0.785	-25.935	-9999	-26.015	-0.08	427.66	-9999	-9999
1998	352	42900	43500	43200	93.45	1.1	-25.59	-9999	-25.455	0.135	515.326	-9999	-9999
1998	352	43500	44100	43800	121.35	0.49	-25.45	-9999	-25.36	0.09	586.594	-9999	-9999
1998	352	45300	45900	45600	272.65	1.34	-25.165	-9999	-25.16	0.005	292	-9999	-9999
1998	352	45900	46500	46200	344.4	1.775	-25	-9999	-25.115	-0.115	285.109	-9999	-9999
1998	352	46500	47100	46800	333	1.385	-24.855	-9999	-24.915	-0.06	233.462	-9999	-9999
1998	352	48300	48900	48600	333.55	1.575	-24.84	-9999	-25.09	-0.25	234.333	-9999	-9999
1998	352	48900	49500	49200	330.9	1.595	-25	-9999	-25.235	-0.235	252.979	-9999	-9999
1998	352	50700	51300	51000	341.3	2.005	-25.47	-9999	-25.6	-0.13	272	-9999	-9999
1998	352	51300	51900	51600	340.75	2.025	-25.435	-9999	-25.6	-0.165	286.265	-9999	-9999
1998	352	51900	52500	52200	341.9	2.08	-25.325	-9999	-25.63	-0.305	288.121	-9999	-9999
1998	352	53700	54300	54000	334.4	2.73	-25.245	-9999	-25.57	-0.325	226.909	-9999	-9999
1998	352	54300	54900	54600	335.45	2.555	-25.215	-9999	-25.565	-0.35	250.842	-9999	-9999
1998	352	56100	56700	56400	325.8	2.355	-24.94	-9999	-25.2	-0.26	180	-9999	-9999
1998	352	56700	57300	57000	324	2.515	-24.97	-9999	-25.2	-0.23	179.88	-9999	-9999
1998	352	57300	57900	57600	325.05	1.64	-24.935	-9999	-25.285	-0.35	184.075	-9999	-9999
1998	352	59100	59700	59400	335.85	1.435	-24.69	-9999	-25	-0.31	156.463	-9999	-9999
1998	352	59700	60300	60000	331	1.14	-24.795	-9999	-25.07	-0.275	151.796	-9999	-9999
1998	352	61500	62100	61800	303.3	0.775	-25	-9999	-25.08	-0.08	179	-9999	-9999
1998	352	62100	62700	62400	294.6	0.695	-25.01	-9999	-25.07	-0.06	161.761	-9999	-9999
1998	352	62700	63300	63000	285.2	0.475	-24.975	-9999	-25.035	-0.06	158.719	-9999	-9999
1998	352	64500	65100	64800	174.05	1.025	-24.73	-9999	-25.06	-0.33	262.201	-9999	-9999
1998	352	65100	65700	65400	166.45	1.11	-24.805	-9999	-25.165	-0.36	235.936	-9999	-9999
1998	352	66900	67500	67200	134.7	0.96	-25.105	-9999	-25.115	-0.01	236	-9999	-9999
1998	352	67500	68100	67800	138.25	1.22	-24.845	-9999	-25.125	-0.28	215.933	-9999	-9999
1998	352	68100	68700	68400	129.65	1.685	-25.3	-9999	-25.205	0.095	258.692	-9999	-9999
1998	352	69900	70500	70200	126	1.805	-25.175	-9999	-25.22	-0.045	233.087	-9999	-9999
1998	352	70500	71100	70800	132.7	1.48	-25.275	-9999	-25.475	-0.2	271.51	-9999	-9999
1998	352	72900	73500	73200	108.85	0.995	-25.45	-9999	-25.335	0.115	357.42	-9999	-9999
1998	352	73500	74100	73800	124.65	1.145	-25.525	-9999	-25.755	-0.23	656.557	-9999	-9999
1998	352	74100	74700	74400	112.7	0.89	-25.655	-9999	-25.59	0.065	432.46	-9999	-9999
1998	352	74700	75300	75000	76.9	1.255	-25.53	-9999	-25.475	0.055	355.851	-9999	-9999
1998	352	75300	75900	75600	97.7	1.34	-25.95	-9999	-25.47	0.48	351.296	-9999	-9999
1998	352	75900	76500	76200	108.45	1.11	-26.28	-9999	-25.54	0.74	371	-9999	-9999
1998	352	76500	77100	76800	79.2	1.44	-26.18	-9999	-25.375	0.805	225.711	-9999	-9999
1998	352	77100	77700	77400	82.3	1.545	-26.67	-9999	-25.52	1.15	200.82	-9999	-9999
1998	352	77700	78300	78000	90.4	1.275	-26.825	-9999	-25.6	1.225	174.569	-9999	-9999
1998	352	78300	78900	78600	94.85	1.375	-26.61	-9999	-25.68	0.93	197.539	-9999	-9999
1998	352	78900	79500	79200	101.6	1.48	-26.42	-9999	-25.825	0.595	188.07	-9999	-9999
1998	352	79500	80100	79800	83.95	1.85	-26.84	-9999	-25.97	0.87	232.393	-9999	-9999
1998	352	81900	82500	82200	36.95	1.83	-27.86	-9999	-25.715	2.145	197.193	-9999	-9999
1998	352	82500	83100	82800	49.05	1.625	-27.49	-9999	-25.73	1.76	229.76	-9999	-9999
1998	352	83100	83700	83400	59.3	1.525	-28.04	-9999	-25.795	2.245	251.226	-9999	-9999
1998	352	83700	84300	84000	61.6	1.585	-28.22	-9999	-25.64	2.58	247.965	-9999	-9999
1998	352	84300	84900	84600	74.45	1.52	-28.21	-9999	-25.73	2.48	277.087	-9999	-9999
1998	352	84900	85500	85200	91.55	1.715	-28.085	-9999	-25.89	2.195	402.859	-9999	-9999
1998	352	85500	86100	85800	101.55	1.98	-27.745	-9999	-26.42	1.325	516.208	-9999	-9999
1998	352	86100	86700	86400	105.778	1.75	-27.4778	-9999	-26.7056	0.772222	494.303	-9999	-9999
1998	353	300	900	600	102.95	1.925	-27.37	-9999	-26.765	0.605	510.021	-9999	-9999
1998	353	900	1500	1200	97.8	2.11	-27.405	-9999	-27.03	0.375	475.677	-9999	-9999
1998	353	1500	2100	1800	97.45	2.075	-27.57	-9999	-26.845	0.725	460.9	-9999	-9999
1998	353	2100	2700	2400	91.95	2.195	-27.825	-9999	-26.9	0.925	447.163	-9999	-9999
1998	353	2700	3300	3000	88.1	2.265	-28.195	-9999	-27.13	1.065	463.118	-9999	-9999
1998	353	3300	3900	3600	82.75	2.4	-28.52	-9999	-27.405	1.115	477.924	-9999	-9999
1998	353	3900	4500	4200	79	3.085	-28.685	-9999	-27.72	0.965	494.606	-9999	-9999
1998	353	4500	5100	4800	78.1	3.055	-28.95	-9999	-27.575	1.375	490.412	-9999	-9999
1998	353	5100	5700	5400	79.05	2.815	-29.035	-9999	-27.58	1.455	501.787	-9999	-9999
1998	353	5700	6300	6000	78.7	3.025	-29.11	-9999	-27.545	1.565	501.327	-9999	-9999
1998	353	6300	6900	6600	82.55	3.07	-29.07	-9999	-27.705	1.365	481.941	-9999	-9999
1998	353	6900	7500	7200	87.2	2.895	-29.035	-9999	-28.215	0.82	472.2	-9999	-9999
1998	353	9900	10500	10200	84.35	3.34	-29.015	-9999	-28.785	0.23	368.75	-9999	-9999
1998	353	10500	11100	10800	85.05	3.53	-29.205	-9999	-28.985	0.22	358.6	-9999	-9999
1998	353	11100	11700	11400	83.4	3.57	-29.29	-9999	-29.175	0.115	357.188	-9999	-9999
1998	353	16500	17100	16800	82.2	3.095	-29.715	-9999	-29.61	0.105	430.571	-9999	-9999
1998	353	17100	17700	17400	79.5	2.975	-29.7	-9999	-29.57	0.13	417.535	-9999	-9999
1998	353	17700	18300	18000	79.1	2.855	-29.785	-9999	-29.6	0.185	419.007	-9999	-9999
1998	353	18300	18900	18600	79.6	2.96	-29.81	-9999	-29.6	0.21	421.522	-9999	-9999
1998	353	18900	19500	19200	78.3	3.015	-29.895	-9999	-29.57	0.325	429.894	-9999	-9999
1998	353	19500	20100	19800	78.3	3.265	-29.84	-9999	-29.29	0.55	424.563	-9999	-9999
1998	353	20100	20700	20400	79.65	2.905	-29.865	-9999	-29.41	0.455	431.065	-9999	-9999
1998	353	20700	21300	21000	78.2	2.915	-29.795	-9999	-29.38	0.415	426.247	-9999	-9999
1998	353	21300	21900	21600	84.45	2.8	-29.785	-9999	-29.46	0.325	419.01	-9999	-9999
1998	353	21900	22500	22200	83.5	2.715	-29.775	-9999	-29.29	0.485	414.238	-9999	-9999
1998	353	22500	23100	22800	80.15	2.96	-29.7	-9999	-29.175	0.525	397.936	-9999	-9999
1998	353	23100	23700	23400	79.1	3.04	-29.7	-9999	-29.21	0.49	397.844	-9999	-9999
1998	353	23700	24300	24000	79.5	3.115	-29.745	-9999	-29.165	0.58	401.766	-9999	-9999
1998	353	26100	26700	26400	69.55	3.01	-29.775	-9999	-28.83	0.945	419.868	-9999	-9999
1998	353	26700	27300	27000	68.1	2.965	-29.8	-9999	-28.845	0.955	415.617	-9999	-9999
1998	353	27300	27900	27600	71.55	2.995	-29.8	-9999	-28.71	1.09	400.539	-9999	-9999
1998	353	27900	28500	28200	74.5	2.925	-29.895	-9999	-28.64	1.255	394.631	-9999	-9999
1998	353	28500	29100	28800	78.6	2.815	-29.945	-9999	-29	0.945	401	-9999	-9999
1998	353	29100	29700	29400	78.55	2.79	-30	-9999	-29.11	0.89	418.687	-9999	-9999
1998	353	29700	30300	30000	78	2.955	-30	-9999	-29.105	0.895	403.519	-9999	-9999
1998	353	30300	30900	30600	76.5	3.19	-30	-9999	-29.105	0.895	412.791	-9999	-9999
1998	353	30900	31500	31200	73.1	3.355	-30	-9999	-28.89	1.11	423.983	-9999	-9999
1998	353	31500	32100	31800	71.85	3.45	-30.005	-9999	-28.785	1.22	429.148	-9999	-9999
1998	353	32100	32700	32400	68.7	3.68	-30.025	-9999	-28.7	1.325	431.963	-9999	-9999
1998	353	32700	33300	33000	69.1	3.685	-30	-9999	-28.6	1.4	429.139	-9999	-9999
1998	353	33300	33900	33600	70.15	3.61	-30.005	-9999	-28.665	1.34	412	-9999	-9999
1998	353	33900	34500	34200	68.6	3.37	-30.06	-9999	-28.76	1.3	423.44	-9999	-9999
1998	353	34500	35100	34800	68.15	3.77	-29.83	-9999	-28.565	1.265	404.583	-9999	-9999
1998	353	35100	35700	35400	65.65	3.585	-29.96	-9999	-28.53	1.43	424.481	-9999	-9999
1998	353	35700	36300	36000	63.1	3.88	-29.815	-9999	-28.275	1.54	410.84	-9999	-9999
1998	353	36300	36900	36600	65.5	3.64	-29.74	-9999	-28.495	1.245	394.438	-9999	-9999
1998	353	36900	37500	37200	67.65	3.21	-29.855	-9999	-28.585	1.27	400.444	-9999	-9999
1998	353	37500	38100	37800	66.7	3.175	-29.985	-9999	-28.515	1.47	412.08	-9999	-9999
1998	353	38100	38700	38400	67.4	3.055	-29.97	-9999	-28.52	1.45	414.812	-9999	-9999
1998	353	38700	39300	39000	64.65	3.255	-29.915	-9999	-28.565	1.35	403.728	-9999	-9999
1998	353	39300	39900	39600	65.3	3.29	-29.845	-9999	-28.595	1.25	399.336	-9999	-9999
1998	353	41100	41700	41400	67.35	3.025	-29.99	-9999	-28.895	1.095	393.339	-9999	-9999
1998	353	41700	42300	42000	70	2.91	-30.125	-9999	-28.815	1.31	396.157	-9999	-9999
1998	353	43500	44100	43800	67.7	2.885	-30.34	-9999	-28.965	1.375	404	-9999	-9999
1998	353	44100	44700	44400	67.15	2.875	-30.47	-9999	-29.155	1.315	407.503	-9999	-9999
1998	353	44700	45300	45000	69.95	2.79	-30.505	-9999	-29.26	1.245	407.328	-9999	-9999
1998	353	46500	47100	46800	66.05	2.915	-30.46	-9999	-29.33	1.13	387.855	-9999	-9999
1998	353	47100	47700	47400	69.6	2.92	-30.475	-9999	-29.07	1.405	401.183	-9999	-9999
1998	353	48900	49500	49200	64.7	2.93	-30.455	-9999	-28.97	1.485	421	-9999	-9999
1998	353	49500	50100	49800	62.55	2.965	-30.47	-9999	-28.94	1.53	437.15	-9999	-9999
1998	353	50100	50700	50400	58.85	3.265	-30.285	-9999	-29.12	1.165	421.398	-9999	-9999
1998	353	51900	52500	52200	54.8	2.885	-30.535	-9999	-29.29	1.245	425.398	-9999	-9999
1998	353	52500	53100	52800	51.25	3.01	-30.385	-9999	-29.22	1.165	420.499	-9999	-9999
1998	353	54300	54900	54600	44.25	3.585	-29.84	-9999	-28.975	0.865	345	-9999	-9999
1998	353	54900	55500	55200	41.1	3.635	-29.715	-9999	-28.895	0.82	346.2	-9999	-9999
1998	353	55500	56100	55800	40.05	3.875	-29.665	-9999	-28.845	0.82	339	-9999	-9999
1998	353	57300	57900	57600	41.35	3.875	-30.01	-9999	-28.65	1.36	359.405	-9999	-9999
1998	353	57900	58500	58200	43.1	3.51	-30.1	-9999	-28.785	1.315	376.093	-9999	-9999
1998	353	59700	60300	60000	45.1	3.37	-29.86	-9999	-28.775	1.085	368	-9999	-9999
1998	353	60300	60900	60600	48.8	2.995	-29.87	-9999	-28.965	0.905	376.514	-9999	-9999
1998	353	60900	61500	61200	51.85	2.7	-30.05	-9999	-29.135	0.915	377.647	-9999	-9999
1998	353	62700	63300	63000	49.55	2.41	-30.04	-9999	-29.24	0.8	352.345	-9999	-9999
1998	353	63300	63900	63600	43.9	2.925	-30.125	-9999	-29.095	1.03	347.435	-9999	-9999
1998	353	65100	65700	65400	41	3.275	-29.645	-9999	-28.785	0.86	313	-9999	-9999
1998	353	65700	66300	66000	42.95	2.965	-29.71	-9999	-28.805	0.905	313.025	-9999	-9999
1998	353	66300	66900	66600	44.4	3.13	-29.34	-9999	-28.765	0.575	288.361	-9999	-9999
1998	353	68100	68700	68400	38.95	3.625	-28.775	-9999	-28.435	0.34	253.966	-9999	-9999
1998	353	68700	69300	69000	39.9	3.445	-28.925	-9999	-28.485	0.44	261.714	-9999	-9999
1998	353	70500	71100	70800	39.1	3.1	-28.83	-9999	-28.455	0.375	257	-9999	-9999
1998	353	71100	71700	71400	34.85	3.35	-28.845	-9999	-28.51	0.335	252.553	-9999	-9999
1998	353	71700	72300	72000	35.5	3.435	-28.935	-9999	-28.51	0.425	248.492	-9999	-9999
1998	353	73500	74100	73800	37.25	3.695	-28.8	-9999	-28.56	0.24	233.986	-9999	-9999
1998	353	74100	74700	74400	43.05	3.4	-29.16	-9999	-28.745	0.415	251.2	-9999	-9999
1998	353	75900	76500	76200	45.4	3.04	-29.905	-9999	-28.895	1.01	280.29	-9999	-9999
1998	353	76500	77100	76800	40.4	3.185	-29.635	-9999	-28.82	0.815	272.978	-9999	-9999
1998	353	77100	77700	77400	29.8	4.015	-29.115	-9999	-28.515	0.6	233.757	-9999	-9999
1998	353	78900	79500	79200	31.4	4.11	-29.075	-9999	-28.46	0.615	216.121	-9999	-9999
1998	353	79500	80100	79800	30.65	4.105	-28.98	-9999	-28.395	0.585	218.604	-9999	-9999
1998	353	81300	81900	81600	29.75	4.02	-28.965	-9999	-28.26	0.705	236.333	-9999	-9999
1998	354	9300	9900	9600	24.35	4.22	-29	-9999	-28.44	0.56	232.6	-9999	-9999
1998	354	9900	10500	10200	24.7	4.375	-29	-9999	-28.33	0.67	233.743	-9999	-9999
1998	354	10500	11100	10800	23.5	4.6	-29	-9999	-28.455	0.545	246.233	-9999	-9999
1998	354	11100	11700	11400	22.5	4.64	-29	-9999	-28.5	0.5	239.818	-9999	-9999
1998	354	11700	12300	12000	22.8	4.565	-29	-9999	-28.5	0.5	244.286	-9999	-9999
1998	354	12300	12900	12600	23.75	4.625	-28.995	-9999	-28.455	0.54	244.833	-9999	-9999
1998	354	12900	13500	13200	22	4.735	-28.95	-9999	-28.32	0.63	241.073	-9999	-9999
1998	354	13500	14100	13800	22.45	4.74	-28.915	-9999	-28.48	0.435	253.543	-9999	-9999
1998	354	14100	14700	14400	21.85	4.67	-28.855	-9999	-28.42	0.435	253.567	-9999	-9999
1998	354	14700	15300	15000	21.25	4.685	-28.87	-9999	-28.33	0.54	248.745	-9999	-9999
1998	354	15300	15900	15600	21.4	4.7	-28.9	-9999	-28.22	0.68	255.829	-9999	-9999
1998	354	15900	16500	16200	23.6	4.79	-28.955	-9999	-28.3	0.655	249.667	-9999	-9999
1998	354	16500	17100	16800	24.5	4.785	-29.02	-9999	-28.35	0.67	265.782	-9999	-9999
1998	354	17100	17700	17400	23.2	4.695	-28.91	-9999	-28.39	0.52	258.433	-9999	-9999
1998	354	17700	18300	18000	25.4	4.615	-29	-9999	-28.485	0.515	283.545	-9999	-9999
1998	354	18300	18900	18600	24	4.745	-29	-9999	-28.545	0.455	263.273	-9999	-9999
1998	354	18900	19500	19200	22.35	4.565	-28.975	-9999	-28.53	0.445	245.673	-9999	-9999
1998	354	19500	20100	19800	23.05	4.615	-28.895	-9999	-28.45	0.445	245.653	-9999	-9999
1998	354	20100	20700	20400	25.15	4.57	-28.965	-9999	-28.54	0.425	255.652	-9999	-9999
1998	354	20700	21300	21000	24.5	4.46	-28.945	-9999	-28.46	0.485	244.562	-9999	-9999
1998	354	21300	21900	21600	27.4	4.27	-29.005	-9999	-28.48	0.525	255.927	-9999	-9999
1998	354	21900	22500	22200	27.1	4.17	-29.02	-9999	-28.54	0.48	256.098	-9999	-9999
1998	354	22500	23100	22800	27.45	4.265	-29.01	-9999	-28.53	0.48	258.716	-9999	-9999
1998	354	23100	23700	23400	26.8	4.315	-29.005	-9999	-28.54	0.465	258.187	-9999	-9999
1998	354	23700	24300	24000	28.95	4.4	-29	-9999	-28.49	0.51	257.554	-9999	-9999
1998	354	24300	24900	24600	29.1	4.475	-28.945	-9999	-28.48	0.465	295.404	-9999	-9999
1998	354	24900	25500	25200	26.05	4.505	-28.91	-9999	-28.56	0.35	277.095	-9999	-9999
1998	354	25500	26100	25800	26.95	4.42	-28.935	-9999	-28.585	0.35	268.957	-9999	-9999
1998	354	26100	26700	26400	27.7	4.495	-28.995	-9999	-28.56	0.435	289.452	-9999	-9999
1998	354	26700	27300	27000	28.05	4.565	-28.9	-9999	-28.52	0.38	313.834	-9999	-9999
1998	354	27300	27900	27600	29.15	4.565	-28.96	-9999	-28.53	0.43	315.5	-9999	-9999
1998	354	27900	28500	28200	28.55	4.575	-28.94	-9999	-28.495	0.445	303.288	-9999	-9999
1998	354	28500	29100	28800	28	4.43	-28.945	-9999	-28.47	0.475	315.053	-9999	-9999
1998	354	29100	29700	29400	27.8	4.335	-29.045	-9999	-28.565	0.48	325.033	-9999	-9999
1998	354	29700	30300	30000	29	4.57	-29.1	-9999	-28.52	0.58	332.481	-9999	-9999
1998	354	30300	30900	30600	29.3	4.705	-29.125	-9999	-28.545	0.58	330.427	-9999	-9999
1998	354	30900	31500	31200	29.15	4.455	-29.13	-9999	-28.655	0.475	333.745	-9999	-9999
1998	354	31500	32100	31800	30.4	4.255	-29.075	-9999	-28.77	0.305	326.21	-9999	-9999
1998	354	32100	32700	32400	30.75	4.33	-29.05	-9999	-28.625	0.425	312.39	-9999	-9999
1998	354	32700	33300	33000	28.15	4.325	-29.1	-9999	-28.83	0.27	331.949	-9999	-9999
1998	354	33300	33900	33600	28.6	4.505	-29.135	-9999	-28.72	0.415	343.939	-9999	-9999
1998	354	33900	34500	34200	29.1	4.275	-29.2	-9999	-28.88	0.32	333.7	-9999	-9999
1998	354	34500	35100	34800	29.3	4.12	-29.2	-9999	-28.965	0.235	320.982	-9999	-9999
1998	354	35100	35700	35400	27	4.235	-29.18	-9999	-28.845	0.335	316.549	-9999	-9999
1998	354	35700	36300	36000	27.95	4.385	-29.16	-9999	-28.79	0.37	317.513	-9999	-9999
1998	354	36300	36900	36600	26.15	4.27	-29.18	-9999	-28.765	0.415	300.913	-9999	-9999
1998	354	36900	37500	37200	23.55	4.335	-29.105	-9999	-28.735	0.37	288.391	-9999	-9999
1998	354	37500	38100	37800	23.35	4.525	-29.05	-9999	-28.75	0.3	289.65	-9999	-9999
1998	354	38100	38700	38400	22.05	4.59	-29.085	-9999	-28.795	0.29	290.108	-9999	-9999
1998	354	38700	39300	39000	21.3	4.69	-28.985	-9999	-28.715	0.27	286.696	-9999	-9999
1998	354	39300	39900	39600	23	4.58	-28.85	-9999	-28.69	0.16	284.631	-9999	-9999
1998	354	39900	40500	40200	20.8	4.53	-28.805	-9999	-28.59	0.215	277.007	-9999	-9999
1998	354	41700	42300	42000	19.55	4.565	-29.1	-9999	-28.69	0.41	277	-9999	-9999
1998	354	42300	42900	42600	17.15	4.645	-29.12	-9999	-28.635	0.485	281.218	-9999	-9999
1998	354	42900	43500	43200	17.25	4.39	-29.15	-9999	-28.685	0.465	284.783	-9999	-9999
1998	354	44700	45300	45000	19.6	4.445	-29.245	-9999	-28.93	0.315	293.657	-9999	-9999
1998	354	45300	45900	45600	19.1	4.435	-29.17	-9999	-28.9	0.27	294.764	-9999	-9999
1998	354	47100	47700	47400	16.25	4.54	-29.265	-9999	-28.985	0.28	293	-9999	-9999
1998	354	47700	48300	48000	14.35	4.745	-29.14	-9999	-28.815	0.325	287.324	-9999	-9999
1998	354	48300	48900	48600	12.85	4.72	-28.975	-9999	-28.73	0.245	283.484	-9999	-9999
1998	354	50100	50700	50400	10.25	4.765	-28.9	-9999	-28.715	0.185	275.662	-9999	-9999
1998	354	50700	51300	51000	12.35	4.695	-28.925	-9999	-28.715	0.21	284.257	-9999	-9999
1998	354	52500	53100	52800	7.6	4.675	-28.9	-9999	-28.775	0.125	277	-9999	-9999
1998	354	53100	53700	53400	7.75	4.735	-28.91	-9999	-28.795	0.115	284.352	-9999	-9999
1998	354	53700	54300	54000	7.85	4.61	-28.955	-9999	-28.8	0.155	289.494	-9999	-9999
1998	354	55500	56100	55800	9.6	4.625	-29	-9999	-28.865	0.135	293.167	-9999	-9999
1998	354	56100	56700	56400	8.45	4.48	-28.975	-9999	-28.82	0.155	293.556	-9999	-9999
1998	354	57900	58500	58200	6.1	4.28	-28.995	-9999	-28.8	0.195	285.333	-9999	-9999
1998	354	58500	59100	58800	8.45	4.22	-28.95	-9999	-28.79	0.16	294.93	-9999	-9999
1998	354	59100	59700	59400	7.25	4.145	-28.9	-9999	-28.785	0.115	295.975	-9999	-9999
1998	354	60900	61500	61200	6.9	4.375	-28.89	-9999	-28.73	0.16	294.393	-9999	-9999
1998	354	61500	62100	61800	7.8	4.275	-28.89	-9999	-28.8	0.09	299.685	-9999	-9999
1998	354	63300	63900	63600	7.85	4.31	-28.935	-9999	-28.7	0.235	290.174	-9999	-9999
1998	354	63900	64500	64200	7.3	4.27	-28.99	-9999	-28.67	0.32	294.815	-9999	-9999
1998	354	64500	65100	64800	6.4	4.3	-29.035	-9999	-28.695	0.34	294.845	-9999	-9999
1998	354	66300	66900	66600	8.7	4.51	-29.39	-9999	-28.705	0.685	302.34	-9999	-9999
1998	354	66900	67500	67200	7.35	4.43	-29.4	-9999	-28.69	0.71	306.639	-9999	-9999
1998	354	68700	69300	69000	5.8	4.445	-29.39	-9999	-28.7	0.69	304.135	-9999	-9999
1998	354	69300	69900	69600	4.6	4.355	-29.235	-9999	-28.72	0.515	307.177	-9999	-9999
1998	354	69900	70500	70200	3.95	4.32	-29.125	-9999	-28.735	0.39	305.611	-9999	-9999
1998	354	71700	72300	72000	1.8	3.955	-29.24	-9999	-28.905	0.335	316.069	-9999	-9999
1998	354	72300	72900	72600	2.95	3.94	-29.2	-9999	-28.945	0.255	312.738	-9999	-9999
1998	354	74100	74700	74400	4.1	3.88	-29.385	-9999	-28.985	0.4	350.5	-9999	-9999
1998	354	74700	75300	75000	3.05	3.87	-29.43	-9999	-28.9	0.53	343.068	-9999	-9999
1998	354	75300	75900	75600	4.05	3.95	-29.35	-9999	-28.88	0.47	339.285	-9999	-9999
1998	354	75900	76500	76200	4.9	3.95	-29.415	-9999	-28.835	0.58	339.571	-9999	-9999
1998	354	76500	77100	76800	4.85	4.04	-29.46	-9999	-28.92	0.54	343.316	-9999	-9999
1998	354	77100	77700	77400	4.95	4.1	-29.415	-9999	-29	0.415	340.667	-9999	-9999
1998	354	77700	78300	78000	2.75	4.08	-29.345	-9999	-28.935	0.41	334.423	-9999	-9999
1998	354	78300	78900	78600	1.65	3.905	-29.3	-9999	-28.91	0.39	328.526	-9999	-9999
1998	354	78900	79500	79200	1.95	3.855	-29.27	-9999	-28.89	0.38	328.4	-9999	-9999
1998	354	79500	80100	79800	3.7	3.88	-29.3	-9999	-28.85	0.45	338.923	-9999	-9999
1998	354	80100	80700	80400	1.25	3.725	-29.3	-9999	-28.975	0.325	329.741	-9999	-9999
1998	354	80700	81300	81000	0.85	3.665	-29.325	-9999	-28.925	0.4	328.814	-9999	-9999
1998	354	82500	83100	82800	1.95	3.68	-29.44	-9999	-28.825	0.615	355.556	-9999	-9999
1998	354	83100	83700	83400	36.8	3.785	-29.5	-9999	-28.885	0.615	344.301	-9999	-9999
1998	354	83700	84300	84000	3.4	3.97	-29.575	-9999	-28.82	0.755	337.036	-9999	-9999
1998	354	84300	84900	84600	4.1	3.95	-29.6	-9999	-28.8	0.8	324.867	-9999	-9999
1998	354	84900	85500	85200	4.5	3.9	-29.6	-9999	-28.775	0.825	321.232	-9999	-9999
1998	354	85500	86100	85800	6.3	4.015	-29.56	-9999	-28.74	0.82	321.747	-9999	-9999
1998	354	86100	86700	86400	7.38889	4.16667	-29.5833	-9999	-28.6944	0.888889	319.653	-9999	-9999
1998	355	300	900	600	6.6	4.245	-29.41	-9999	-28.57	0.84	313.969	-9999	-9999
1998	355	900	1500	1200	3.55	4.305	-29.235	-9999	-28.71	0.525	291.15	-9999	-9999
1998	355	1500	2100	1800	5.4	4.185	-29.2	-9999	-28.605	0.595	297.117	-9999	-9999
1998	355	2100	2700	2400	4.6	4.11	-29.235	-9999	-28.44	0.795	303.837	-9999	-9999
1998	355	2700	3300	3000	6.6	4.15	-29.3	-9999	-28.515	0.785	317.54	-9999	-9999
1998	355	3300	3900	3600	6.35	3.995	-29.245	-9999	-28.645	0.6	320.801	-9999	-9999
1998	355	3900	4500	4200	6.15	4.015	-29.18	-9999	-28.515	0.665	311.879	-9999	-9999
1998	355	7500	8100	7800	8.65	3.675	-29.17	-9999	-28.29	0.88	275.857	-9999	-9999
1998	355	8100	8700	8400	8.85	3.74	-29.175	-9999	-28.185	0.99	253.219	-9999	-9999
1998	355	8700	9300	9000	9.25	3.83	-29.15	-9999	-28.225	0.925	245.033	-9999	-9999
1998	355	9300	9900	9600	8.7	3.645	-29.1	-9999	-28.395	0.705	270.004	-9999	-9999
1998	355	9900	10500	10200	10.95	3.73	-29.055	-9999	-28.335	0.72	286.847	-9999	-9999
1998	355	10500	11100	10800	10.05	3.755	-28.98	-9999	-28.225	0.755	288.553	-9999	-9999
1998	355	11100	11700	11400	13.2	3.615	-29.035	-9999	-28.105	0.93	295.332	-9999	-9999
1998	355	11700	12300	12000	13.75	3.585	-29.075	-9999	-28.155	0.92	298.387	-9999	-9999
1998	355	12300	12900	12600	12.2	3.595	-29.01	-9999	-28.24	0.77	291.842	-9999	-9999
1998	355	16500	17100	16800	15	4.015	-29.06	-9999	-28.47	0.59	298.6	-9999	-9999
1998	355	17100	17700	17400	15.85	3.785	-29.085	-9999	-28.595	0.49	301.2	-9999	-9999
1998	355	17700	18300	18000	16.65	3.66	-29.1	-9999	-28.485	0.615	260	-9999	-9999
1998	355	18300	18900	18600	15.4	3.66	-29.1	-9999	-28.59	0.51	265.6	-9999	-9999
1998	355	18900	19500	19200	11.95	3.61	-29.12	-9999	-28.6	0.52	266.4	-9999	-9999
1998	355	19500	20100	19800	13.25	3.82	-29.1	-9999	-28.585	0.515	257.4	-9999	-9999
1998	355	20100	20700	20400	14.15	3.93	-29.125	-9999	-28.57	0.555	263.8	-9999	-9999
1998	355	20700	21300	21000	14.4	4.265	-29.155	-9999	-28.37	0.785	265.6	-9999	-9999
1998	355	21300	21900	21600	13.95	4.075	-29.16	-9999	-28.5	0.66	265.8	-9999	-9999
1998	355	21900	22500	22200	12.6	3.815	-29.175	-9999	-28.62	0.555	255	-9999	-9999
1998	355	22500	23100	22800	12.25	3.75	-29.165	-9999	-28.73	0.435	250.2	-9999	-9999
1998	355	23100	23700	23400	11.1	3.62	-29.175	-9999	-28.835	0.34	249	-9999	-9999
1998	355	23700	24300	24000	10.45	3.56	-29.2	-9999	-29.055	0.145	251.2	-9999	-9999
1998	355	26100	26700	26400	11.1	3.915	-29.175	-9999	-28.85	0.325	282.4	-9999	-9999
1998	355	26700	27300	27000	10.85	4.04	-29.085	-9999	-28.855	0.23	268.6	-9999	-9999
1998	355	27300	27900	27600	12.75	3.89	-29.1	-9999	-28.85	0.25	275.4	-9999	-9999
1998	355	27900	28500	28200	10.75	3.795	-29.155	-9999	-28.765	0.39	242.2	-9999	-9999
1998	355	28500	29100	28800	9.8	3.665	-29.2	-9999	-28.97	0.23	233.8	-9999	-9999
1998	355	29100	29700	29400	10.6	3.985	-29.105	-9999	-28.775	0.33	223	-9999	-9999
1998	355	29700	30300	30000	10.75	4.17	-29.1	-9999	-28.82	0.28	233.2	-9999	-9999
1998	355	30300	30900	30600	13.65	4.295	-29.165	-9999	-28.925	0.24	236.2	-9999	-9999
1998	355	30900	31500	31200	12.65	4.385	-29.2	-9999	-28.92	0.28	237.8	-9999	-9999
1998	355	31500	32100	31800	10.15	4.295	-29.265	-9999	-28.96	0.305	253.6	-9999	-9999
1998	355	32100	32700	32400	10.8	4.22	-29.275	-9999	-28.95	0.325	256.8	-9999	-9999
1998	355	32700	33300	33000	9.3	3.88	-29.295	-9999	-28.835	0.46	253.4	-9999	-9999
1998	355	33300	33900	33600	10.35	3.435	-29.34	-9999	-28.875	0.465	255.8	-9999	-9999
1998	355	33900	34500	34200	12.45	3.42	-29.31	-9999	-28.915	0.395	255.2	-9999	-9999
1998	355	34500	35100	34800	13.9	4.005	-29.3	-9999	-29.01	0.29	252.8	-9999	-9999
1998	355	35100	35700	35400	14	4.29	-29.29	-9999	-29	0.29	257	-9999	-9999
1998	355	35700	36300	36000	11.05	4.225	-29.245	-9999	-28.99	0.255	243.2	-9999	-9999
1998	355	36300	36900	36600	11.45	4.33	-29.145	-9999	-28.91	0.235	235.8	-9999	-9999
1998	355	36900	37500	37200	9.3	3.92	-29.1	-9999	-28.945	0.155	230	-9999	-9999
1998	355	37500	38100	37800	7.25	3.9	-29.08	-9999	-28.855	0.225	224.6	-9999	-9999
1998	355	38100	38700	38400	6.55	3.83	-29.035	-9999	-28.79	0.245	227	-9999	-9999
1998	355	38700	39300	39000	9.15	3.885	-29.16	-9999	-28.91	0.25	227.72	-9999	-9999
1998	355	39300	39900	39600	13.85	3.96	-29.12	-9999	-29.005	0.115	230.674	-9999	-9999
1998	355	39900	40500	40200	14.05	3.975	-29.2	-9999	-29.005	0.195	238.947	-9999	-9999
1998	355	40500	41100	40800	12.4	3.84	-29.255	-9999	-29	0.255	237.147	-9999	-9999
1998	355	41100	41700	41400	14.35	4.015	-29.345	-9999	-28.895	0.45	237.489	-9999	-9999
1998	355	41700	42300	42000	11.2	3.555	-29.415	-9999	-28.845	0.57	227.8	-9999	-9999
1998	355	42300	42900	42600	10.35	3.235	-29.5	-9999	-29	0.5	222	-9999	-9999
1998	355	42900	43500	43200	10.6	3.655	-29.46	-9999	-28.91	0.55	211.6	-9999	-9999
1998	355	43500	44100	43800	11.15	3.535	-29.48	-9999	-28.8	0.68	215.4	-9999	-9999
1998	355	44100	44700	44400	12.75	3.555	-29.405	-9999	-28.74	0.665	208.4	-9999	-9999
1998	355	44700	45300	45000	13.05	3.285	-29.39	-9999	-28.63	0.76	202.4	-9999	-9999
1998	355	45300	45900	45600	14	3.125	-29.27	-9999	-28.765	0.505	195	-9999	-9999
1998	355	45900	46500	46200	20.7	3.395	-29.2	-9999	-28.75	0.45	195.6	-9999	-9999
1998	355	46500	47100	46800	26.6	3.485	-29.28	-9999	-28.78	0.5	203.2	-9999	-9999
1998	355	47100	47700	47400	25.75	3.3	-29.225	-9999	-28.665	0.56	208.6	-9999	-9999
1998	355	47700	48300	48000	24.6	3.305	-29.065	-9999	-28.425	0.64	202	-9999	-9999
1998	355	48300	48900	48600	25.3	3.47	-28.895	-9999	-28.12	0.775	192.4	-9999	-9999
1998	355	48900	49500	49200	27.55	3.76	-28.845	-9999	-27.935	0.91	194.8	-9999	-9999
1998	355	49500	50100	49800	32.15	3.675	-28.98	-9999	-27.98	1	209	-9999	-9999
1998	355	50100	50700	50400	41.6	3.205	-29.13	-9999	-28.53	0.6	239.6	-9999	-9999
1998	355	50700	51300	51000	40.95	3.215	-29.18	-9999	-28.515	0.665	260.8	-9999	-9999
1998	355	51300	51900	51600	44.75	3.35	-29.26	-9999	-28.445	0.815	274	-9999	-9999
1998	355	51900	52500	52200	48.3	3.055	-29.405	-9999	-28.97	0.435	283.8	-9999	-9999
1998	355	52500	53100	52800	47	2.97	-29.455	-9999	-29.195	0.26	286.6	-9999	-9999
1998	355	53100	53700	53400	44.3	3.14	-29.305	-9999	-29.06	0.245	279.6	-9999	-9999
1998	355	53700	54300	54000	41.35	3.2	-29.29	-9999	-29.025	0.265	277.6	-9999	-9999
1998	355	54300	54900	54600	38.3	3.045	-29.24	-9999	-29.025	0.215	275.4	-9999	-9999
1998	355	54900	55500	55200	38.3	2.95	-29.365	-9999	-29.155	0.21	287.6	-9999	-9999
1998	355	55500	56100	55800	39.55	2.485	-29.455	-9999	-29.245	0.21	300	-9999	-9999
1998	355	56100	56700	56400	45.55	2.315	-29.51	-9999	-29.3	0.21	304.6	-9999	-9999
1998	355	56700	57300	57000	49.45	2.15	-29.56	-9999	-29.315	0.245	316.8	-9999	-9999
1998	355	57300	57900	57600	47.05	2.655	-29.545	-9999	-29.16	0.385	316	-9999	-9999
1998	355	57900	58500	58200	47.3	2.17	-29.6	-9999	-29.275	0.325	319.4	-9999	-9999
1998	355	58500	59100	58800	43.7	2.11	-29.51	-9999	-29.165	0.345	312.6	-9999	-9999
1998	355	59100	59700	59400	40.1	2.46	-29.405	-9999	-29.05	0.355	308.4	-9999	-9999
1998	355	59700	60300	60000	35.2	2.77	-29.3	-9999	-28.94	0.36	298.8	-9999	-9999
1998	355	60300	60900	60600	41.5	2.395	-29.335	-9999	-29.07	0.265	305.2	-9999	-9999
1998	355	60900	61500	61200	41.8	2.38	-29.385	-9999	-29.225	0.16	317.6	-9999	-9999
1998	355	61500	62100	61800	30.6	3.13	-29.115	-9999	-29.015	0.1	262.2	-9999	-9999
1998	355	62100	62700	62400	28.6	3.305	-28.995	-9999	-28.89	0.105	269.8	-9999	-9999
1998	355	62700	63300	63000	29.8	3.76	-28.97	-9999	-28.72	0.25	268.2	-9999	-9999
1998	355	63300	63900	63600	31.7	3.67	-28.955	-9999	-28.73	0.225	269.6	-9999	-9999
1998	355	63900	64500	64200	32.7	3.555	-29	-9999	-28.74	0.26	266.6	-9999	-9999
1998	355	64500	65100	64800	36.15	3.605	-29.045	-9999	-28.735	0.31	266.4	-9999	-9999
1998	355	65100	65700	65400	36.2	3.54	-29.11	-9999	-28.725	0.385	271.2	-9999	-9999
1998	355	65700	66300	66000	32.5	3.49	-29.1	-9999	-28.56	0.54	269.6	-9999	-9999
1998	355	66300	66900	66600	32.35	2.965	-29.155	-9999	-28.615	0.54	265	-9999	-9999
1998	355	66900	67500	67200	33.95	2.88	-29.155	-9999	-28.665	0.49	256.2	-9999	-9999
1998	355	67500	68100	67800	27.45	3.395	-28.91	-9999	-28.44	0.47	233.8	-9999	-9999
1998	355	68100	68700	68400	29.45	3.485	-28.84	-9999	-28.495	0.345	246.2	-9999	-9999
1998	355	68700	69300	69000	24.75	3.85	-28.73	-9999	-28.41	0.32	248.4	-9999	-9999
1998	355	69300	69900	69600	21.4	3.965	-28.605	-9999	-28.3	0.305	232	-9999	-9999
1998	355	69900	70500	70200	21.15	4.19	-28.555	-9999	-28.305	0.25	224.8	-9999	-9999
1998	355	70500	71100	70800	21.25	4.275	-28.51	-9999	-28.17	0.34	222.2	-9999	-9999
1998	355	71100	71700	71400	18.6	4.175	-28.43	-9999	-28.16	0.27	210	-9999	-9999
1998	355	71700	72300	72000	19.8	4.49	-28.425	-9999	-28.025	0.4	214	-9999	-9999
1998	355	72300	72900	72600	19.75	4.58	-28.405	-9999	-28.14	0.265	213.6	-9999	-9999
1998	355	72900	73500	73200	19.35	4.67	-28.485	-9999	-28.305	0.18	207.6	-9999	-9999
1998	355	73500	74100	73800	19.8	4.35	-28.6	-9999	-28.4	0.2	218	-9999	-9999
1998	355	74100	74700	74400	17.55	4.285	-28.61	-9999	-28.345	0.265	220.2	-9999	-9999
1998	355	74700	75300	75000	15.85	4.345	-28.585	-9999	-28.31	0.275	217.4	-9999	-9999
1998	355	75300	75900	75600	17.6	4.57	-28.52	-9999	-28.33	0.19	212	-9999	-9999
1998	355	75900	76500	76200	15.05	4.975	-28.555	-9999	-28.31	0.245	199.4	-9999	-9999
1998	355	76500	77100	76800	9.4	4.89	-28.55	-9999	-28.275	0.275	196	-9999	-9999
1998	355	77100	77700	77400	8.2	4.81	-28.59	-9999	-28.325	0.265	210.2	-9999	-9999
1998	355	77700	78300	78000	5.8	4.5	-28.6	-9999	-28.33	0.27	211.4	-9999	-9999
1998	355	78300	78900	78600	5.75	4.35	-28.685	-9999	-28.51	0.175	203.2	-9999	-9999
1998	355	78900	79500	79200	10.2	4.415	-28.725	-9999	-28.52	0.205	201.4	-9999	-9999
1998	355	79500	80100	79800	9.7	4.27	-28.795	-9999	-28.475	0.32	200.8	-9999	-9999
1998	355	80100	80700	80400	9.1	4.185	-28.78	-9999	-28.385	0.395	196	-9999	-9999
1998	355	80700	81300	81000	8.85	3.7	-28.795	-9999	-28.47	0.325	206.6	-9999	-9999
1998	355	83100	83700	83400	19.65	3.495	-28.97	-9999	-28.53	0.44	207.2	-9999	-9999
1998	355	83700	84300	84000	18.3	3.31	-29.08	-9999	-28.515	0.565	213.2	-9999	-9999
1998	355	84300	84900	84600	17.3	3.165	-29.17	-9999	-28.685	0.485	210.8	-9999	-9999
1998	355	84900	85500	85200	15.2	3.58	-29.065	-9999	-28.675	0.39	199.6	-9999	-9999
1998	355	85500	86100	85800	17.9	3.92	-29.025	-9999	-28.58	0.445	202.6	-9999	-9999
1998	355	86100	86700	86400	19.1111	3.86667	-29.1333	-9999	-28.5833	0.55	198.6	-9999	-9999
1998	356	3300	3900	3600	19.5	3.675	-29.02	-9999	-28.64	0.38	182.6	-9999	-9999
1998	356	3900	4500	4200	22.35	3.5	-29.075	-9999	-28.645	0.43	190.6	-9999	-9999
1998	356	4500	5100	4800	23.85	3.335	-29.11	-9999	-28.7	0.41	205.6	-9999	-9999
1998	356	5100	5700	5400	25.95	3.22	-29.12	-9999	-28.53	0.59	197.4	-9999	-9999
1998	356	5700	6300	6000	27.5	3.145	-29.1	-9999	-28.395	0.705	195.2	-9999	-9999
1998	356	6300	6900	6600	30.45	3.17	-29.115	-9999	-28.275	0.84	202.8	-9999	-9999
1998	356	6900	7500	7200	36.1	2.775	-29.235	-9999	-28.535	0.7	225	-9999	-9999
1998	356	7500	8100	7800	46.6	2.165	-29.335	-9999	-28.755	0.58	259.4	-9999	-9999
1998	356	8100	8700	8400	53.9	2.005	-29.495	-9999	-28.925	0.57	287.8	-9999	-9999
1998	356	8700	9300	9000	59.3	1.975	-29.6	-9999	-29.035	0.565	328.4	-9999	-9999
1998	356	9300	9900	9600	55.85	2.205	-29.675	-9999	-28.87	0.805	326.4	-9999	-9999
1998	356	9900	10500	10200	53.35	2.415	-29.6	-9999	-28.7	0.9	314.6	-9999	-9999
1998	356	10500	11100	10800	58.75	2.265	-29.615	-9999	-28.8938	0.72125	325.8	-9999	-9999
1998	356	11100	11700	11400	62.45	2.265	-29.655	-9999	-29.13	0.525	318	-9999	-9999
1998	356	11700	12300	12000	59.4	2.275	-29.53	-9999	-29.13	0.4	368	-9999	-9999
1998	356	12300	12900	12600	60.1	2.255	-29.615	-9999	-29.2	0.415	392.6	-9999	-9999
1998	356	12900	13500	13200	69.45	1.97	-29.755	-9999	-29.2	0.555	395.6	-9999	-9999
1998	356	13500	14100	13800	69.45	2.29	-29.8	-9999	-29.22	0.58	428.6	-9999	-9999
1998	356	14100	14700	14400	68.2	2.605	-29.715	-9999	-29.055	0.66	423	-9999	-9999
1998	356	18300	18900	18600	90.05	2.555	-29.76	-9999	-29.2	0.56	386.299	-9999	-9999
1998	356	18900	19500	19200	93.8	2.45	-29.91	-9999	-29.2	0.71	381.873	-9999	-9999
1998	356	19500	20100	19800	92.95	2.335	-29.87	-9999	-29.365	0.505	383.38	-9999	-9999
1998	356	20100	20700	20400	88.85	2.475	-29.59	-9999	-29.245	0.345	385.724	-9999	-9999
1998	356	20700	21300	21000	85.5	2.52	-29.5	-9999	-29.29	0.21	368.05	-9999	-9999
1998	356	21300	21900	21600	81.75	2.1	-29.55	-9999	-29.455	0.095	375.96	-9999	-9999
1998	356	21900	22500	22200	76.7	1.76	-29.465	-9999	-29.54	-0.075	383.6	-9999	-9999
1998	356	22500	23100	22800	75.3	2.155	-29.495	-9999	-29.455	0.04	378	-9999	-9999
1998	356	23100	23700	23400	76.1	2.055	-29.59	-9999	-29.355	0.235	387.2	-9999	-9999
1998	356	23700	24300	24000	68.6	2.245	-29.495	-9999	-29.21	0.285	376.4	-9999	-9999
1998	356	24300	24900	24600	69	2.505	-29.44	-9999	-29.135	0.305	371.6	-9999	-9999
1998	356	24900	25500	25200	71.7	2.595	-29.365	-9999	-29.125	0.24	364.8	-9999	-9999
1998	356	25500	26100	25800	66.85	3.02	-29.235	-9999	-28.76	0.475	334.6	-9999	-9999
1998	356	26100	26700	26400	61.1	3.18	-29.09	-9999	-28.7	0.39	315.4	-9999	-9999
1998	356	26700	27300	27000	53.85	3.08	-28.945	-9999	-28.67	0.275	290	-9999	-9999
1998	356	27300	27900	27600	48.95	3.05	-28.865	-9999	-28.635	0.23	284.6	-9999	-9999
1998	356	27900	28500	28200	42.4	2.98	-28.79	-9999	-28.6	0.19	274.4	-9999	-9999
1998	356	28500	29100	28800	35.35	3.55	-28.67	-9999	-28.35	0.32	278.8	-9999	-9999
1998	356	29100	29700	29400	32.7	3.845	-28.465	-9999	-28.2	0.265	256.8	-9999	-9999
1998	356	29700	30300	30000	32.9	3.87	-28.435	-9999	-28.115	0.32	242.8	-9999	-9999
1998	356	30300	30900	30600	32.45	3.79	-28.4	-9999	-28.035	0.365	254.4	-9999	-9999
1998	356	30900	31500	31200	30.7	3.795	-28.38	-9999	-27.775	0.605	226.2	-9999	-9999
1998	356	31500	32100	31800	29.2	3.68	-28.385	-9999	-27.985	0.4	222.4	-9999	-9999
1998	356	32100	32700	32400	25.75	3.815	-28.3	-9999	-28.1	0.2	218.2	-9999	-9999
1998	356	32700	33300	33000	25.25	3.64	-28.24	-9999	-28.025	0.215	208.8	-9999	-9999
1998	356	33300	33900	33600	28.65	3.56	-28.3	-9999	-28.035	0.265	209.6	-9999	-9999
1998	356	33900	34500	34200	30.3	3.725	-28.265	-9999	-28.005	0.26	201.4	-9999	-9999
1998	356	34500	35100	34800	31.1	3.71	-28.28	-9999	-28.125	0.155	204.6	-9999	-9999
1998	356	35100	35700	35400	36.65	3.54	-28.505	-9999	-28.2	0.305	212.6	-9999	-9999
1998	356	35700	36300	36000	38.6	3.23	-28.745	-9999	-28.28	0.465	228.6	-9999	-9999
1998	356	36300	36900	36600	38.15	3.685	-28.51	-9999	-28.3	0.21	216.2	-9999	-9999
1998	356	36900	37500	37200	39.7	3.55	-28.54	-9999	-28.35	0.19	222.668	-9999	-9999
1998	356	37500	38100	37800	41.2	3.11	-28.655	-9999	-28.17	0.485	227.453	-9999	-9999
1998	356	38100	38700	38400	46.95	3.015	-28.615	-9999	-28.26	0.355	230.346	-9999	-9999
1998	356	38700	39300	39000	47.45	2.925	-28.585	-9999	-28.305	0.28	240.52	-9999	-9999
1998	356	39300	39900	39600	48.6	3.14	-28.96	-9999	-28.575	0.385	244.68	-9999	-9999
1998	356	39900	40500	40200	48.05	3.41	-28.91	-9999	-28.49	0.42	237.26	-9999	-9999
1998	356	40500	41100	40800	44.3	3.825	-28.53	-9999	-28.19	0.34	220.249	-9999	-9999
1998	356	41100	41700	41400	46.3	4.015	-28.22	-9999	-28.125	0.095	211.51	-9999	-9999
1998	356	41700	42300	42000	44.7	3.97	-28.1	-9999	-27.99	0.11	198.027	-9999	-9999
1998	356	42300	42900	42600	49.25	3.795	-28.12	-9999	-28.035	0.085	204.547	-9999	-9999
1998	356	42900	43500	43200	54.55	3.665	-27.915	-9999	-27.805	0.11	212.751	-9999	-9999
1998	356	43500	44100	43800	54.15	4.145	-27.855	-9999	-27.73	0.125	209.693	-9999	-9999
1998	356	44100	44700	44400	55.25	3.89	-27.82	-9999	-27.71	0.11	210.4	-9999	-9999
1998	356	44700	45300	45000	53.9	3.71	-27.81	-9999	-27.68	0.13	205.734	-9999	-9999
1998	356	45300	45900	45600	53.25	3.91	-28.005	-9999	-27.7	0.305	206.15	-9999	-9999
1998	356	45900	46500	46200	53.8	3.745	-28.16	-9999	-28.03	0.13	212.55	-9999	-9999
1998	356	46500	47100	46800	51.35	3.82	-28.29	-9999	-28.135	0.155	214.8	-9999	-9999
1998	356	47100	47700	47400	50.7	3.54	-28.38	-9999	-28.2	0.18	211.402	-9999	-9999
1998	356	47700	48300	48000	50.45	3.57	-28.36	-9999	-28.2	0.16	206.5	-9999	-9999
1998	356	48300	48900	48600	50.6	3.84	-28.285	-9999	-28.2	0.085	197.307	-9999	-9999
1998	356	48900	49500	49200	51.15	3.78	-28.28	-9999	-28.2	0.08	203.447	-9999	-9999
1998	356	49500	50100	49800	50.45	3.91	-28.305	-9999	-28.2	0.105	198.684	-9999	-9999
1998	356	50100	50700	50400	51.3	4.28	-28.305	-9999	-28.2	0.105	197.513	-9999	-9999
1998	356	50700	51300	51000	53	4.145	-28.3	-9999	-28.2	0.1	200.643	-9999	-9999
1998	356	51300	51900	51600	52.05	4.22	-28.335	-9999	-28.2	0.135	199.557	-9999	-9999
1998	356	51900	52500	52200	49.85	4.39	-28.25	-9999	-28.17	0.08	191.103	-9999	-9999
1998	356	52500	53100	52800	47.25	4.385	-27.985	-9999	-28.105	-0.12	194.2	-9999	-9999
1998	356	53100	53700	53400	44.25	4.07	-27.92	-9999	-28.135	-0.215	179.84	-9999	-9999
1998	356	53700	54300	54000	47.95	4.125	-28.11	-9999	-28.19	-0.08	181.591	-9999	-9999
1998	356	57900	58500	58200	61.05	3.49	-28.645	-9999	-28.515	0.13	203.633	-9999	-9999
1998	356	58500	59100	58800	62.1	3.565	-28.74	-9999	-28.575	0.165	202.654	-9999	-9999
1998	356	59100	59700	59400	51.25	4.195	-28.5	-9999	-28.305	0.195	175.91	-9999	-9999
1998	356	59700	60300	60000	46.4	4.405	-28.25	-9999	-28.2	0.05	149.6	-9999	-9999
1998	356	60300	60900	60600	45.3	4.575	-28.265	-9999	-28.2	0.065	149.62	-9999	-9999
1998	356	60900	61500	61200	46.85	4.25	-28.335	-9999	-28.43	-0.095	148.1	-9999	-9999
1998	356	61500	62100	61800	50.15	4.02	-28.565	-9999	-28.675	-0.11	172.88	-9999	-9999
1998	356	62100	62700	62400	52.6	3.855	-28.625	-9999	-28.7	-0.075	175.08	-9999	-9999
1998	356	62700	63300	63000	50.35	3.855	-28.715	-9999	-28.7	0.015	175.681	-9999	-9999
1998	356	63300	63900	63600	51.2	3.685	-28.78	-9999	-28.7	0.08	170.177	-9999	-9999
1998	356	63900	64500	64200	49.5	3.715	-28.75	-9999	-28.7	0.05	163.103	-9999	-9999
1998	356	64500	65100	64800	50.75	3.755	-28.78	-9999	-28.7	0.08	158.023	-9999	-9999
1998	356	65100	65700	65400	55	3.615	-28.875	-9999	-28.7	0.175	160.183	-9999	-9999
1998	356	65700	66300	66000	60.7	3.34	-29.115	-9999	-28.985	0.13	167.62	-9999	-9999
1998	356	66300	66900	66600	61.85	3.16	-29.19	-9999	-28.865	0.325	175.18	-9999	-9999
1998	356	66900	67500	67200	66	3.19	-29.2	-9999	-28.805	0.395	180.9	-9999	-9999
1998	356	67500	68100	67800	65.55	3.285	-29.18	-9999	-28.835	0.345	185.88	-9999	-9999
1998	356	68100	68700	68400	65.45	3.63	-29.105	-9999	-28.7	0.405	185.258	-9999	-9999
1998	356	68700	69300	69000	66.45	3.58	-29.015	-9999	-28.7	0.315	174.2	-9999	-9999
1998	356	69300	69900	69600	67.05	3.63	-28.99	-9999	-28.7	0.29	166	-9999	-9999
1998	356	69900	70500	70200	71.45	3.7	-29	-9999	-28.7	0.3	164.8	-9999	-9999
1998	356	70500	71100	70800	73.4	3.555	-29.005	-9999	-28.715	0.29	173	-9999	-9999
1998	356	71100	71700	71400	79.45	3.31	-29.08	-9999	-29	0.08	190.8	-9999	-9999
1998	356	71700	72300	72000	80.6	3.5	-29.12	-9999	-28.97	0.15	199.8	-9999	-9999
1998	356	72300	72900	72600	79.3	3.435	-29.1	-9999	-29.015	0.085	191.2	-9999	-9999
1998	356	72900	73500	73200	80	3.6	-29.095	-9999	-29.15	-0.055	201.6	-9999	-9999
1998	356	73500	74100	73800	77.6	3.73	-29.085	-9999	-28.95	0.135	206.8	-9999	-9999
1998	356	74100	74700	74400	73.95	3.81	-28.95	-9999	-28.7	0.25	190.8	-9999	-9999
1998	356	74700	75300	75000	75.1	3.63	-28.845	-9999	-28.685	0.16	190	-9999	-9999
1998	356	75300	75900	75600	70.15	3.82	-28.66	-9999	-28.49	0.17	185.6	-9999	-9999
1998	356	75900	76500	76200	64.3	4.225	-28.525	-9999	-28.2	0.325	180.2	-9999	-9999
1998	356	76500	77100	76800	60.5	4.61	-28.415	-9999	-28.2	0.215	175.2	-9999	-9999
1998	356	77100	77700	77400	59.5	4.61	-28.395	-9999	-28.19	0.205	175	-9999	-9999
1998	356	77700	78300	78000	58.9	4.61	-28.32	-9999	-28.18	0.14	177.6	-9999	-9999
1998	356	80100	80700	80400	59.7	5.33	-28.185	-9999	-28.075	0.11	196	-9999	-9999
1998	356	80700	81300	81000	57.25	5.3	-28.135	-9999	-27.775	0.36	164.4	-9999	-9999
1998	356	81900	82500	82200	54.6	5.045	-28.1	-9999	-27.73	0.37	165.8	-9999	-9999
1998	356	82500	83100	82800	52.8	4.78	-28.095	-9999	-27.7	0.395	163.6	-9999	-9999
1998	356	83100	83700	83400	48.75	5.165	-28	-9999	-27.675	0.325	152	-9999	-9999
1998	356	83700	84300	84000	48.75	5.255	-27.98	-9999	-27.595	0.385	145	-9999	-9999
1998	356	84300	84900	84600	49.45	5.015	-28.05	-9999	-27.7	0.35	147.8	-9999	-9999
1998	356	84900	85500	85200	51.5	4.705	-28.085	-9999	-27.7	0.385	151.286	-9999	-9999
1998	356	85500	86100	85800	50.35	4.64	-28.1	-9999	-27.7	0.4	150.817	-9999	-9999
1998	356	86100	86700	86400	48.8333	4.97778	-28.1	-9999	-27.7222	0.377778	148.961	-9999	-9999
1998	357	15900	16500	16200	46.9	4.18	-28.235	-9999	-28.055	0.18	161	-9999	-9999
1998	357	16500	17100	16800	51.65	4.105	-28.31	-9999	-28.185	0.125	167.8	-9999	-9999
1998	357	17100	17700	17400	56	3.765	-28.435	-9999	-28.3	0.135	165	-9999	-9999
1998	357	17700	18300	18000	58.65	3.79	-28.44	-9999	-28.3	0.14	166.6	-9999	-9999
1998	357	18300	18900	18600	58.55	3.76	-28.435	-9999	-28.225	0.21	169	-9999	-9999
1998	357	18900	19500	19200	60.05	3.61	-28.39	-9999	-28.195	0.195	171.4	-9999	-9999
1998	357	19500	20100	19800	62.9	3.35	-28.39	-9999	-28.12	0.27	170.8	-9999	-9999
1998	357	20100	20700	20400	60.1	3.445	-28.51	-9999	-28.12	0.39	171.2	-9999	-9999
1998	357	20700	21300	21000	57.35	3.575	-28.22	-9999	-27.845	0.375	170.8	-9999	-9999
1998	357	21300	21900	21600	54.85	3.875	-27.975	-9999	-27.825	0.15	155.6	-9999	-9999
1998	357	21900	22500	22200	53.5	4.07	-28.01	-9999	-27.88	0.13	159.8	-9999	-9999
1998	357	22500	23100	22800	50.8	4.375	-28.015	-9999	-27.945	0.07	153.2	-9999	-9999
1998	357	23100	23700	23400	46.3	4.285	-27.975	-9999	-28.01	-0.035	144.4	-9999	-9999
1998	357	23700	24300	24000	46.35	4.43	-27.975	-9999	-27.955	0.02	144.6	-9999	-9999
1998	357	24300	24900	24600	45.95	4.43	-28.045	-9999	-27.985	0.06	141.6	-9999	-9999
1998	357	24900	25500	25200	41.95	4.415	-28.145	-9999	-27.875	0.27	136.4	-9999	-9999
1998	357	25500	26100	25800	43.6	4.685	-27.61	-9999	-27.645	-0.035	134.6	-9999	-9999
1998	357	26100	26700	26400	47.1	4.23	-27.895	-9999	-27.815	0.08	142.8	-9999	-9999
1998	357	26700	27300	27000	45.55	4.13	-27.99	-9999	-27.86	0.13	142.2	-9999	-9999
1998	357	27300	27900	27600	43.5	4.04	-28	-9999	-27.9	0.1	135.6	-9999	-9999
1998	357	27900	28500	28200	46	4.07	-28	-9999	-27.915	0.085	129.8	-9999	-9999
1998	357	28500	29100	28800	50.2	3.985	-28.075	-9999	-27.985	0.09	142.4	-9999	-9999
1998	357	29100	29700	29400	51	4.065	-28.015	-9999	-27.9	0.115	132.8	-9999	-9999
1998	357	29700	30300	30000	53.1	3.92	-28.085	-9999	-27.92	0.165	127.6	-9999	-9999
1998	357	30300	30900	30600	49.75	3.98	-27.955	-9999	-27.92	0.035	120.6	-9999	-9999
1998	357	30900	31500	31200	49.6	4.09	-27.98	-9999	-27.86	0.12	119.6	-9999	-9999
1998	357	31500	32100	31800	53.05	4.125	-27.97	-9999	-27.905	0.065	122.8	-9999	-9999
1998	357	32100	32700	32400	54.95	4.07	-28.02	-9999	-27.975	0.045	128.199	-9999	-9999
1998	357	32700	33300	33000	52.2	4.49	-27.95	-9999	-27.9	0.05	128.449	-9999	-9999
1998	357	33300	33900	33600	49.95	5.005	-28.095	-9999	-27.92	0.175	124.48	-9999	-9999
1998	357	33900	34500	34200	47.3	4.84	-27.53	-9999	-27.54	-0.01	115.92	-9999	-9999
1998	357	34500	35100	34800	54.6	5.145	-27.305	-9999	-27.29	0.015	119.24	-9999	-9999
1998	357	35100	35700	35400	59.45	4.76	-27.195	-9999	-27.235	-0.04	130.538	-9999	-9999
1998	357	35700	36300	36000	58.6	5.12	-27.105	-9999	-27.155	-0.05	134.367	-9999	-9999
1998	357	36300	36900	36600	53.1	5.675	-27.12	-9999	-27.085	0.035	129.38	-9999	-9999
1998	357	38100	38700	38400	54.55	5.65	-27.225	-9999	-27.1	0.125	150.226	-9999	-9999
1998	357	38700	39300	39000	53.7	5.66	-27.29	-9999	-27.21	0.08	137.79	-9999	-9999
1998	357	39300	39900	39600	53.15	5.57	-27.35	-9999	-27.28	0.07	140.308	-9999	-9999
1998	357	41100	41700	41400	50.05	5.745	-27.455	-9999	-27.21	0.245	137.794	-9999	-9999
1998	357	41700	42300	42000	50.6	5.475	-27.565	-9999	-27.33	0.235	142.805	-9999	-9999
1998	357	43500	44100	43800	57.05	5.305	-27.795	-9999	-27.4	0.395	154.919	-9999	-9999
1998	357	44100	44700	44400	55.6	5.205	-27.73	-9999	-27.4	0.33	154.815	-9999	-9999
1998	357	44700	45300	45000	56.5	5.22	-27.72	-9999	-27.49	0.23	157.222	-9999	-9999
1998	357	46500	47100	46800	57.55	5.31	-27.71	-9999	-27.505	0.205	165.667	-9999	-9999
1998	357	47100	47700	47400	57.45	5.135	-27.69	-9999	-27.485	0.205	166.531	-9999	-9999
1998	357	48900	49500	49200	57.85	4.815	-27.535	-9999	-27.55	-0.015	173.462	-9999	-9999
1998	357	49500	50100	49800	60.65	4.775	-27.495	-9999	-27.42	0.075	177.758	-9999	-9999
1998	357	50100	50700	50400	64.25	4.725	-27.6	-9999	-27.51	0.09	181.674	-9999	-9999
1998	357	51900	52500	52200	60.5	4.99	-27.285	-9999	-27.13	0.155	176.993	-9999	-9999
1998	357	52500	53100	52800	59.2	4.815	-26.965	-9999	-26.855	0.11	172.516	-9999	-9999
1998	357	54300	54900	54600	31.35	6.15	-26.75	-9999	-26.795	-0.045	141.59	-9999	-9999
1998	357	54900	55500	55200	31.9	5.585	-26.91	-9999	-26.965	-0.055	148.104	-9999	-9999
1998	357	55500	56100	55800	35.85	5.15	-27.055	-9999	-27.06	-0.005	153.363	-9999	-9999
1998	357	57300	57900	57600	42.35	5.405	-27.2	-9999	-27.23	-0.03	157.306	-9999	-9999
1998	357	57900	58500	58200	41.75	5.275	-27.2	-9999	-27.21	-0.01	157.863	-9999	-9999
1998	357	59700	60300	60000	52.8	4.54	-27.435	-9999	-27.435	0	182.594	-9999	-9999
1998	357	60300	60900	60600	54.7	4.43	-27.505	-9999	-27.475	0.03	187.264	-9999	-9999
1998	357	60900	61500	61200	56.45	4.285	-27.6	-9999	-27.55	0.05	191.775	-9999	-9999
1998	357	62700	63300	63000	69.15	3.895	-27.815	-9999	-27.635	0.18	205.907	-9999	-9999
1998	357	63300	63900	63600	73.2	3.61	-27.855	-9999	-27.69	0.165	209.532	-9999	-9999
1998	357	65100	65700	65400	78.3	3.635	-27.545	-9999	-27.545	0	212.451	-9999	-9999
1998	357	65700	66300	66000	76.8	4.015	-27.335	-9999	-27.27	0.065	214.484	-9999	-9999
1998	357	66300	66900	66600	77.15	4.525	-27.27	-9999	-27.185	0.085	221.357	-9999	-9999
1998	357	68100	68700	68400	79.15	4.355	-27.47	-9999	-27.425	0.045	222.103	-9999	-9999
1998	357	68700	69300	69000	78.35	4.095	-27.535	-9999	-27.475	0.06	226.935	-9999	-9999
1998	357	70500	71100	70800	76.4	4.35	-27.37	-9999	-27.255	0.115	241.696	-9999	-9999
1998	357	71100	71700	71400	74.85	4.275	-27.41	-9999	-27.27	0.14	244.85	-9999	-9999
1998	357	71700	72300	72000	76.9	4.565	-27.28	-9999	-27.25	0.03	243.926	-9999	-9999
1998	357	73500	74100	73800	76.2	4.765	-27.09	-9999	-27.05	0.04	216.32	-9999	-9999
1998	357	74100	74700	74400	75	5.06	-26.91	-9999	-26.88	0.03	209.288	-9999	-9999
1998	357	75900	76500	76200	76.5	4.925	-26.865	-9999	-26.965	-0.1	212.833	-9999	-9999
1998	357	76500	77100	76800	78.65	5.2	-27	-9999	-27.095	-0.095	210.412	-9999	-9999
1998	357	77100	77700	77400	77	5.545	-26.92	-9999	-26.975	-0.055	210.414	-9999	-9999
1998	357	78900	79500	79200	77.4	5.675	-27.205	-9999	-27.27	-0.065	213.667	-9999	-9999
1998	357	80700	81300	81000	75.95	5.205	-27.555	-9999	-27.48	0.075	259.405	-9999	-9999
1998	357	81300	81900	81600	75.6	5.015	-27.625	-9999	-27.535	0.09	243.44	-9999	-9999
1998	357	81900	82500	82200	73.9	4.975	-27.63	-9999	-27.495	0.135	237.987	-9999	-9999
1998	357	82500	83100	82800	77.4	4.74	-27.76	-9999	-27.645	0.115	244.807	-9999	-9999
1998	357	83100	83700	83400	75.6	4.985	-27.68	-9999	-27.595	0.085	241.78	-9999	-9999
1998	357	83700	84300	84000	75.05	5.195	-27.57	-9999	-27.515	0.055	232.77	-9999	-9999
1998	357	84300	84900	84600	74.3	5.06	-27.57	-9999	-27.505	0.065	228.289	-9999	-9999
1998	357	84900	85500	85200	76.75	4.83	-27.735	-9999	-27.735	0	225.4	-9999	-9999
1998	357	85500	86100	85800	77.05	4.715	-27.74	-9999	-27.745	-0.005	228.7	-9999	-9999
1998	357	86100	86700	86400	75.8889	4.37222	-28	-9999	-27.7889	0.211111	222.2	-9999	-9999
1998	358	300	900	600	74.85	4.88	-27.735	-9999	-27.59	0.145	211.399	-9999	-9999
1998	358	900	1500	1200	74.35	4.94	-27.445	-9999	-27.48	-0.035	207.393	-9999	-9999
1998	358	1500	2100	1800	73.55	4.915	-27.36	-9999	-27.36	0	204.58	-9999	-9999
1998	358	2100	2700	2400	71.15	5.11	-27.365	-9999	-27.185	0.18	199.87	-9999	-9999
1998	358	2700	3300	3000	72.4	5	-27.35	-9999	-27.245	0.105	204.618	-9999	-9999
1998	358	3300	3900	3600	72.85	4.7	-27.45	-9999	-27.43	0.02	201.189	-9999	-9999
1998	358	5100	5700	5400	71.7	4.885	-27.835	-9999	-27.655	0.18	198.8	-9999	-9999
1998	358	5700	6300	6000	69.95	4.85	-27.75	-9999	-27.66	0.09	199.6	-9999	-9999
1998	358	6300	6900	6600	63.65	4.815	-27.55	-9999	-27.57	-0.02	204.5	-9999	-9999
1998	358	6900	7500	7200	64.1	4.535	-27.575	-9999	-27.625	-0.05	203.4	-9999	-9999
1998	358	24900	25500	25200	304.25	1.295	-29.35	-9999	-28.7	0.65	203.837	-9999	-9999
1998	358	25500	26100	25800	12.1	1.045	-29.28	-9999	-28.665	0.615	227.75	-9999	-9999
1998	358	26100	26700	26400	55	0.91	-29.9	-9999	-28.65	1.25	369.18	-9999	-9999
1998	358	26700	27300	27000	59.55	1.175	-30.09	-9999	-28.615	1.475	317.03	-9999	-9999
1998	358	27300	27900	27600	58.6	1.25	-30.175	-9999	-28.67	1.505	272.748	-9999	-9999
1998	358	27900	28500	28200	63.4	1.355	-30.23	-9999	-28.755	1.475	246.033	-9999	-9999
1998	358	28500	29100	28800	76.8	1.52	-30.395	-9999	-28.91	1.485	360.267	-9999	-9999
1998	358	29100	29700	29400	91.25	1.795	-30.86	-9999	-29.165	1.695	601.6	-9999	-9999
1998	358	29700	30300	30000	89.65	1.8	-30.85	-9999	-29.195	1.655	384.744	-9999	-9999
1998	358	30300	30900	30600	78.6	1.725	-30.475	-9999	-29.155	1.32	234.683	-9999	-9999
1998	358	30900	31500	31200	81.5	1.9	-30.245	-9999	-29.06	1.185	315.91	-9999	-9999
1998	358	31500	32100	31800	89.7	1.975	-30.115	-9999	-29.065	1.05	488.944	-9999	-9999
1998	358	32100	32700	32400	85.8	2.1	-30.07	-9999	-29.045	1.025	479.92	-9999	-9999
1998	358	32700	33300	33000	87.1	2.14	-30.045	-9999	-29.045	1	567.48	-9999	-9999
1998	358	33300	33900	33600	88.6	2.19	-30.215	-9999	-29.24	0.975	652.12	-9999	-9999
1998	358	33900	34500	34200	82.3	2.17	-30.305	-9999	-29.125	1.18	638.542	-9999	-9999
1998	358	34500	35100	34800	76.95	2.24	-30.425	-9999	-29.065	1.36	572.5	-9999	-9999
1998	358	35100	35700	35400	72.1	2.5	-30.35	-9999	-28.895	1.455	525.623	-9999	-9999
1998	358	35700	36300	36000	70.35	2.555	-30.26	-9999	-28.965	1.295	492.1	-9999	-9999
1998	358	36300	36900	36600	72.9	2.555	-30.335	-9999	-28.975	1.36	458.478	-9999	-9999
1998	358	36900	37500	37200	79.3	2.535	-30.55	-9999	-29.035	1.515	445.62	-9999	-9999
1998	358	37500	38100	37800	72.65	2.305	-30.685	-9999	-29.105	1.58	451.553	-9999	-9999
1998	358	38100	38700	38400	66.35	2.24	-30.64	-9999	-28.94	1.7	485.32	-9999	-9999
1998	358	38700	39300	39000	64.95	2.19	-30.655	-9999	-28.835	1.82	438.814	-9999	-9999
1998	358	39300	39900	39600	124.9	2.745	-30.46	-9999	-29.46	1	397.074	-9999	-9999
1998	358	39900	40500	40200	13.45	3.245	-30.485	-9999	-29.67	0.815	319.8	-9999	-9999
1998	358	40500	41100	40800	20.15	3	-30.57	-9999	-29.63	0.94	313.8	-9999	-9999
1998	358	41100	41700	41400	9.7	3.35	-30.72	-9999	-30.1	0.62	287.8	-9999	-9999
1998	358	41700	42300	42000	8.4	3.685	-30.835	-9999	-30.365	0.47	296.4	-9999	-9999
1998	358	42300	42900	42600	7.25	3.75	-31.13	-9999	-30.44	0.69	291.6	-9999	-9999
1998	358	42900	43500	43200	197.65	3.855	-31.365	-9999	-31.085	0.28	289.2	-9999	-9999
1998	358	43500	44100	43800	355.95	3.67	-31.645	-9999	-31.42	0.225	280.8	-9999	-9999
1998	358	44100	44700	44400	352.9	3.78	-31.8	-9999	-31.67	0.13	269.8	-9999	-9999
1998	358	44700	45300	45000	355	3.76	-31.89	-9999	-31.855	0.035	280.8	-9999	-9999
1998	358	45300	45900	45600	354.45	4.135	-32.015	-9999	-31.965	0.05	276.4	-9999	-9999
1998	358	45900	46500	46200	351.9	4.135	-32.145	-9999	-32.145	0	280	-9999	-9999
1998	358	46500	47100	46800	355.7	3.88	-32.2	-9999	-32.275	-0.075	278.4	-9999	-9999
1998	358	47100	47700	47400	355.35	3.72	-32.295	-9999	-32.305	-0.01	281	-9999	-9999
1998	358	47700	48300	48000	286.45	3.44	-32.225	-9999	-32.22	0.005	269.4	-9999	-9999
1998	358	48300	48900	48600	320.05	3.445	-32.295	-9999	-32.12	0.175	270	-9999	-9999
1998	358	48900	49500	49200	322	3.27	-32.195	-9999	-32.31	-0.115	282.4	-9999	-9999
1998	358	49500	50100	49800	357.15	3.62	-32.23	-9999	-32.295	-0.065	280	-9999	-9999
1998	358	50100	50700	50400	356.15	3.335	-32.255	-9999	-32.38	-0.125	300.6	-9999	-9999
1998	358	50700	51300	51000	355.6	3.41	-32.295	-9999	-32.27	0.025	292	-9999	-9999
1998	358	51300	51900	51600	233.05	3.565	-32.2	-9999	-32.245	-0.045	274	-9999	-9999
1998	358	51900	52500	52200	2.3	3.565	-32.2	-9999	-32.26	-0.06	273.8	-9999	-9999
1998	358	52500	53100	52800	179.55	3.59	-32.255	-9999	-32.3	-0.045	284.4	-9999	-9999
1998	358	53100	53700	53400	340.55	3.6	-32.31	-9999	-32.305	0.005	291.6	-9999	-9999
1998	358	53700	54300	54000	144.95	3.455	-32.3	-9999	-32.35	-0.05	287.6	-9999	-9999
1998	358	54300	54900	54600	357.05	3.545	-32.35	-9999	-32.265	0.085	258.8	-9999	-9999
1998	358	54900	55500	55200	321.85	3.685	-32.25	-9999	-32.1	0.15	249	-9999	-9999
1998	358	55500	56100	55800	197.3	3.865	-32.215	-9999	-32.125	0.09	238.6	-9999	-9999
1998	358	56100	56700	56400	1.45	3.815	-32.175	-9999	-32.135	0.04	232.4	-9999	-9999
1998	358	56700	57300	57000	19.8	4.025	-32.07	-9999	-32.145	-0.075	210.2	-9999	-9999
1998	358	57300	57900	57600	108.45	4.385	-32.14	-9999	-32.165	-0.025	217	-9999	-9999
1998	358	57900	58500	58200	268.55	4.69	-32.085	-9999	-32.035	0.05	202.2	-9999	-9999
1998	358	58500	59100	58800	2.95	4.62	-32.01	-9999	-32.02	-0.01	200.2	-9999	-9999
1998	358	59100	59700	59400	2.9	4.785	-31.93	-9999	-31.94	-0.01	188.2	-9999	-9999
1998	358	59700	60300	60000	3.45	4.995	-31.995	-9999	-31.97	0.025	188.2	-9999	-9999
1998	358	60300	60900	60600	6.1	4.915	-32.08	-9999	-32.125	-0.045	196.6	-9999	-9999
1998	358	60900	61500	61200	7.35	4.86	-32.015	-9999	-32.045	-0.03	187.4	-9999	-9999
1998	358	61500	62100	61800	4.05	5.185	-32.015	-9999	-32.025	-0.01	180.4	-9999	-9999
1998	358	62100	62700	62400	5.3	5.215	-32.115	-9999	-32.165	-0.05	185.4	-9999	-9999
1998	358	62700	63300	63000	37.8	5.18	-32.255	-9999	-32.29	-0.035	193.2	-9999	-9999
1998	358	63300	63900	63600	4.45	5.29	-32.245	-9999	-32.23	0.015	191.2	-9999	-9999
1998	358	63900	64500	64200	40.3	5.22	-32.31	-9999	-32.295	0.015	194.2	-9999	-9999
1998	358	64500	65100	64800	215.75	5.18	-32.375	-9999	-32.28	0.095	183.8	-9999	-9999
1998	358	65100	65700	65400	3.85	5.42	-32.36	-9999	-32.16	0.2	186.8	-9999	-9999
1998	358	65700	66300	66000	4.3	5.395	-32.425	-9999	-32.23	0.195	178	-9999	-9999
1998	358	66300	66900	66600	3	5.51	-32.4	-9999	-32.195	0.205	163.4	-9999	-9999
1998	358	66900	67500	67200	4.3	5.335	-32.4	-9999	-32.195	0.205	165.8	-9999	-9999
1998	358	67500	68100	67800	3.5	5.55	-32.4	-9999	-32.08	0.32	151.2	-9999	-9999
1998	358	68100	68700	68400	3.6	5.535	-32.4	-9999	-32.06	0.34	149.6	-9999	-9999
1998	358	68700	69300	69000	2	5.45	-32.38	-9999	-32.185	0.195	137.866	-9999	-9999
1998	358	69300	69900	69600	2.2	5.515	-32.355	-9999	-32.055	0.3	128.25	-9999	-9999
1998	358	69900	70500	70200	5.45	5.49	-32.215	-9999	-32.01	0.205	121.924	-9999	-9999
1998	358	70500	71100	70800	19.2	5.62	-32.18	-9999	-31.97	0.21	116.2	-9999	-9999
1998	358	71100	71700	71400	286.45	5.32	-31.875	-9999	-31.84	0.035	113	-9999	-9999
1998	358	71700	72300	72000	358.25	4.985	-31.865	-9999	-31.865	0	109.493	-9999	-9999
1998	358	72300	72900	72600	126.45	5.235	-31.87	-9999	-31.81	0.06	107.299	-9999	-9999
1998	358	72900	73500	73200	233.4	5.805	-31.465	-9999	-31.65	-0.185	103.827	-9999	-9999
1998	358	73500	74100	73800	321.1	5.705	-31.435	-9999	-31.66	-0.225	95.4067	-9999	-9999
1998	358	74100	74700	74400	355	5.845	-31.55	-9999	-31.69	-0.14	94.2027	-9999	-9999
1998	358	74700	75300	75000	358.55	5.545	-31.77	-9999	-31.845	-0.075	99.7	-9999	-9999
1998	358	75300	75900	75600	161.7	5.605	-31.76	-9999	-31.85	-0.09	99.5	-9999	-9999
1998	358	75900	76500	76200	233.15	5.27	-31.965	-9999	-31.955	0.01	101	-9999	-9999
1998	358	76500	77100	76800	233.3	4.9	-32.095	-9999	-32.04	0.055	99.5083	-9999	-9999
1998	358	77100	77700	77400	2	4.825	-32.125	-9999	-32.17	-0.045	103.2	-9999	-9999
1998	358	77700	78300	78000	4.45	4.83	-32.14	-9999	-32.23	-0.09	106.407	-9999	-9999
1998	358	78300	78900	78600	1.85	4.78	-32.32	-9999	-32.25	0.07	109.937	-9999	-9999
1998	358	78900	79500	79200	251.45	4.51	-32.2	-9999	-32.175	0.025	116.754	-9999	-9999
1998	358	79500	80100	79800	162.1	4.47	-32.085	-9999	-32.065	0.02	112.48	-9999	-9999
1998	358	80100	80700	80400	92.55	4.885	-31.84	-9999	-31.98	-0.14	108	-9999	-9999
1998	358	80700	81300	81000	5.75	4.525	-32.09	-9999	-32.135	-0.045	111.08	-9999	-9999
1998	358	81300	81900	81600	2.55	4.415	-31.98	-9999	-31.775	0.205	117.781	-9999	-9999
1998	358	81900	82500	82200	9.05	4.92	-31.6	-9999	-31.6	0	112.45	-9999	-9999
1998	358	82500	83100	82800	4.6	4.725	-31.655	-9999	-31.655	0	108.92	-9999	-9999
1998	358	83100	83700	83400	6.95	4.435	-31.745	-9999	-31.88	-0.135	110.449	-9999	-9999
1998	358	83700	84300	84000	14.45	3.995	-32.04	-9999	-31.955	0.085	133.133	-9999	-9999
1998	358	84300	84900	84600	22.75	4.02	-32.12	-9999	-31.92	0.2	156	-9999	-9999
1998	359	3300	3900	3600	19.95	2.885	-32.01	-9999	-31.43	0.58	173.255	-9999	-9999
1998	359	3900	4500	4200	33.75	2.54	-31.95	-9999	-31.67	0.28	176.817	-9999	-9999
1998	359	4500	5100	4800	41.75	2.195	-32.11	-9999	-31.74	0.37	193.587	-9999	-9999
1998	359	5100	5700	5400	42.65	2.56	-32.245	-9999	-31.76	0.485	193.484	-9999	-9999
1998	359	5700	6300	6000	51.95	3.025	-32.19	-9999	-31.99	0.2	229.2	-9999	-9999
1998	359	6300	6900	6600	45.6	2.98	-32.28	-9999	-32.065	0.215	244	-9999	-9999
1998	359	6900	7500	7200	46.65	2.66	-32.445	-9999	-32.075	0.37	242.4	-9999	-9999
1998	359	7500	8100	7800	50	2.415	-32.685	-9999	-32.23	0.455	262	-9999	-9999
1998	359	8100	8700	8400	47.65	2.545	-32.88	-9999	-32.2	0.68	257.2	-9999	-9999
1998	359	8700	9300	9000	40.2	2.49	-32.725	-9999	-31.85	0.875	251	-9999	-9999
1998	359	9300	9900	9600	28.75	2.695	-32.605	-9999	-31.485	1.12	231	-9999	-9999
1998	359	9900	10500	10200	28.9	2.81	-32.625	-9999	-31.47	1.155	224	-9999	-9999
1998	359	10500	11100	10800	21.05	2.71	-32.27	-9999	-31.1	1.17	221.2	-9999	-9999
1998	359	11100	11700	11400	27.45	2.25	-32.25	-9999	-31.21	1.04	243.2	-9999	-9999
1998	359	12900	13500	13200	32.95	2	-32.38	-9999	-31.59	0.79	242	-9999	-9999
1998	359	13500	14100	13800	32.6	1.73	-32.685	-9999	-31.695	0.99	245	-9999	-9999
1998	359	14100	14700	14400	28.6	1.935	-32.845	-9999	-31.605	1.24	232	-9999	-9999
1998	359	14700	15300	15000	31.65	1.825	-32.65	-9999	-31.54	1.11	229.4	-9999	-9999
1998	359	15300	15900	15600	30.95	1.77	-32.66	-9999	-31.515	1.145	231.6	-9999	-9999
1998	359	15900	16500	16200	27.8	1.845	-32.615	-9999	-31.53	1.085	241.2	-9999	-9999
1998	359	16500	17100	16800	18.15	1.77	-32.595	-9999	-31.79	0.805	253	-9999	-9999
1998	359	17100	17700	17400	13.55	1.71	-32.5	-9999	-31.71	0.79	226.2	-9999	-9999
1998	359	17700	18300	18000	266.45	1.9	-32.5	-9999	-31.81	0.69	198.8	-9999	-9999
1998	359	18300	18900	18600	348.25	1.87	-32.5	-9999	-31.9	0.6	196	-9999	-9999
1998	359	18900	19500	19200	352.35	1.82	-32.44	-9999	-31.915	0.525	186.8	-9999	-9999
1998	359	19500	20100	19800	194.7	1.81	-32.5	-9999	-32	0.5	215.6	-9999	-9999
1998	359	20100	20700	20400	229.45	1.895	-32.5	-9999	-32.03	0.47	199.2	-9999	-9999
1998	359	20700	21300	21000	350.5	1.8	-32.5	-9999	-32.03	0.47	203.2	-9999	-9999
1998	359	21300	21900	21600	355.5	1.91	-32.575	-9999	-31.99	0.585	224.8	-9999	-9999
1998	359	21900	22500	22200	355.8	2.12	-32.65	-9999	-31.975	0.675	220.8	-9999	-9999
1998	359	22500	23100	22800	351.9	2.265	-32.81	-9999	-32.115	0.695	233.8	-9999	-9999
1998	359	23100	23700	23400	349.95	2.225	-32.895	-9999	-32.235	0.66	227	-9999	-9999
1998	359	23700	24300	24000	342.7	2.305	-32.975	-9999	-32.125	0.85	227	-9999	-9999
1998	359	24300	24900	24600	344.05	2.245	-33	-9999	-32.115	0.885	233	-9999	-9999
1998	359	24900	25500	25200	344.6	2.265	-32.96	-9999	-32.015	0.945	213.6	-9999	-9999
1998	359	25500	26100	25800	353.2	2.545	-33.035	-9999	-32.14	0.895	297	-9999	-9999
1998	359	26100	26700	26400	20.3	2.715	-33.015	-9999	-32.25	0.765	265.4	-9999	-9999
1998	359	26700	27300	27000	196.65	2.715	-33.045	-9999	-32.25	0.795	259.6	-9999	-9999
1998	359	27300	27900	27600	338.05	2.85	-33.095	-9999	-32.46	0.635	272.4	-9999	-9999
1998	359	27900	28500	28200	268.85	2.965	-33.2	-9999	-32.61	0.59	320	-9999	-9999
1998	359	28500	29100	28800	349.95	2.735	-33.2	-9999	-32.395	0.805	311.2	-9999	-9999
1998	359	29100	29700	29400	354.1	2.78	-33.275	-9999	-32.54	0.735	328.8	-9999	-9999
1998	359	29700	30300	30000	196	2.95	-33.215	-9999	-32.54	0.675	342.4	-9999	-9999
1998	359	30300	30900	30600	340.15	2.875	-33.2	-9999	-32.38	0.82	312.8	-9999	-9999
1998	359	30900	31500	31200	303.6	2.735	-33.2	-9999	-32.075	1.125	280	-9999	-9999
1998	359	31500	32100	31800	39.55	2.665	-33.2	-9999	-32.17	1.03	299.4	-9999	-9999
1998	359	32100	32700	32400	4.1	2.76	-33.2	-9999	-32.09	1.11	283.4	-9999	-9999
1998	359	32700	33300	33000	266.7	2.615	-33.165	-9999	-31.78	1.385	248.4	-9999	-9999
1998	359	33300	33900	33600	58.4	2.56	-33.115	-9999	-31.715	1.4	290.6	-9999	-9999
1998	359	33900	34500	34200	266.1	2.405	-33.21	-9999	-31.83	1.38	239.2	-9999	-9999
1998	359	34500	35100	34800	285.05	2.125	-33.125	-9999	-31.73	1.395	239.8	-9999	-9999
1998	359	35100	35700	35400	53.6	1.635	-33.295	-9999	-31.925	1.37	320.2	-9999	-9999
1998	359	35700	36300	36000	69.1	1.45	-33.385	-9999	-32.215	1.17	386.4	-9999	-9999
1998	359	36300	36900	36600	67.1	1.505	-33.515	-9999	-32	1.515	393.4	-9999	-9999
1998	359	36900	37500	37200	59.65	1.705	-33.67	-9999	-31.485	2.185	373.8	-9999	-9999
1998	359	37500	38100	37800	41.95	2.295	-33.715	-9999	-31.145	2.57	432.6	-9999	-9999
1998	359	38100	38700	38400	40.15	2.75	-33.49	-9999	-31.11	2.38	417.4	-9999	-9999
1998	359	38700	39300	39000	41.35	2.765	-33.265	-9999	-31	2.265	397.631	-9999	-9999
1998	359	39300	39900	39600	59.6	2.44	-33.48	-9999	-31.245	2.235	420.067	-9999	-9999
1998	359	39900	40500	40200	62.85	2.005	-33.66	-9999	-31.305	2.355	478.304	-9999	-9999
1998	359	40500	41100	40800	64.4	2.315	-33.82	-9999	-31.705	2.115	543.862	-9999	-9999
1998	359	41100	41700	41400	61.15	2.405	-33.895	-9999	-31.56	2.335	539.8	-9999	-9999
1998	359	41700	42300	42000	66.35	2.37	-34.035	-9999	-31.69	2.345	545	-9999	-9999
1998	359	42300	42900	42600	64.15	2.185	-34	-9999	-31.725	2.275	533.4	-9999	-9999
1998	359	42900	43500	43200	68.3	2.465	-34.06	-9999	-31.96	2.1	504.4	-9999	-9999
1998	359	43500	44100	43800	62.65	3.25	-34.035	-9999	-31.84	2.195	512.2	-9999	-9999
1998	359	44100	44700	44400	53.2	2.96	-33.885	-9999	-31.085	2.8	527.4	-9999	-9999
1998	359	44700	45300	45000	55.45	2.505	-33.75	-9999	-30.875	2.875	475.4	-9999	-9999
1998	359	45300	45900	45600	64.05	2.695	-33.78	-9999	-31.725	2.055	507.4	-9999	-9999
1998	359	45900	46500	46200	56.1	2.98	-33.66	-9999	-31.13	2.53	458.2	-9999	-9999
1998	359	46500	47100	46800	56.9	3.12	-33.535	-9999	-31.095	2.44	455.4	-9999	-9999
1998	359	47100	47700	47400	61.25	3.225	-33.53	-9999	-31.47	2.06	455.8	-9999	-9999
1998	359	47700	48300	48000	60.95	3.35	-33.445	-9999	-31.085	2.36	421	-9999	-9999
1998	359	48300	48900	48600	61	3.24	-33.35	-9999	-30.76	2.59	397.4	-9999	-9999
1998	359	48900	49500	49200	66.35	3.315	-33.395	-9999	-31.1	2.295	419.4	-9999	-9999
1998	359	49500	50100	49800	63.05	3.645	-33.32	-9999	-30.89	2.43	396.4	-9999	-9999
1998	359	50100	50700	50400	63.85	3.67	-33.075	-9999	-30.545	2.53	389.6	-9999	-9999
1998	359	50700	51300	51000	66.4	3.72	-33.01	-9999	-30.88	2.13	378.8	-9999	-9999
1998	359	51300	51900	51600	71.65	3.315	-33.165	-9999	-31.67	1.495	442.4	-9999	-9999
1998	359	51900	52500	52200	75.5	2.825	-33.395	-9999	-31.6	1.795	476.4	-9999	-9999
1998	359	52500	53100	52800	78.35	2.88	-33.395	-9999	-31.35	2.045	464.6	-9999	-9999
1998	359	53100	53700	53400	81.05	3.31	-33.225	-9999	-30.855	2.37	416.4	-9999	-9999
1998	359	53700	54300	54000	82.5	3.31	-33.15	-9999	-30.52	2.63	383.8	-9999	-9999
1998	359	54300	54900	54600	82.3	3.615	-33	-9999	-30.73	2.27	383.4	-9999	-9999
1998	359	54900	55500	55200	79.75	3.69	-32.945	-9999	-30.46	2.485	402.2	-9999	-9999
1998	359	55500	56100	55800	78.75	4.005	-32.755	-9999	-31.11	1.645	377.8	-9999	-9999
1998	359	56100	56700	56400	80.5	3.57	-32.57	-9999	-30.925	1.645	374.8	-9999	-9999
1998	359	56700	57300	57000	81.5	3.65	-32.505	-9999	-31.145	1.36	385.2	-9999	-9999
1998	359	57300	57900	57600	81.1	3.695	-32.41	-9999	-31.67	0.74	387.8	-9999	-9999
1998	359	57900	58500	58200	83.2	3.63	-32.175	-9999	-31.78	0.395	368	-9999	-9999
1998	359	58500	59100	58800	86.65	3.36	-32.09	-9999	-31.87	0.22	359.8	-9999	-9999
1998	359	59100	59700	59400	86.2	3.235	-32.115	-9999	-31.82	0.295	355.8	-9999	-9999
1998	359	59700	60300	60000	86.95	3.545	-32.01	-9999	-31.475	0.535	331.6	-9999	-9999
1998	359	60300	60900	60600	89.35	3.88	-31.67	-9999	-31.18	0.49	316.6	-9999	-9999
1998	359	60900	61500	61200	88.7	4.13	-31.41	-9999	-30.97	0.44	312	-9999	-9999
1998	359	61500	62100	61800	90.9	3.8	-31.265	-9999	-30.85	0.415	310.8	-9999	-9999
1998	359	62100	62700	62400	92.5	3.835	-31.23	-9999	-30.825	0.405	320.2	-9999	-9999
1998	359	62700	63300	63000	95.1	3.97	-31.115	-9999	-30.78	0.335	317.4	-9999	-9999
1998	359	63300	63900	63600	93.55	3.975	-31.09	-9999	-30.745	0.345	312	-9999	-9999
1998	359	63900	64500	64200	89.8	3.97	-31.035	-9999	-30.575	0.46	307.6	-9999	-9999
1998	359	64500	65100	64800	87.75	4.185	-30.965	-9999	-30.65	0.315	306.2	-9999	-9999
1998	359	65100	65700	65400	84.35	4.15	-30.98	-9999	-30.47	0.51	304	-9999	-9999
1998	359	65700	66300	66000	83	3.955	-30.985	-9999	-30.57	0.415	306.2	-9999	-9999
1998	359	66300	66900	66600	80.85	3.85	-31.04	-9999	-30.39	0.65	306.4	-9999	-9999
1998	359	66900	67500	67200	79.2	3.93	-30.97	-9999	-30.11	0.86	302.4	-9999	-9999
1998	359	67500	68100	67800	76	4.055	-30.95	-9999	-29.99	0.96	295	-9999	-9999
1998	359	68100	68700	68400	75.95	4.21	-30.865	-9999	-29.62	1.245	291.8	-9999	-9999
1998	359	68700	69300	69000	76.1	4.03	-30.915	-9999	-29.73	1.185	299	-9999	-9999
1998	359	69300	69900	69600	75.95	4.045	-31.14	-9999	-29.795	1.345	303	-9999	-9999
1998	359	69900	70500	70200	77.15	4.05	-31.145	-9999	-29.59	1.555	305	-9999	-9999
1998	359	70500	71100	70800	74.5	4.025	-31.005	-9999	-29.63	1.375	297.5	-9999	-9999
1998	359	71100	71700	71400	72.65	4.18	-30.945	-9999	-29.535	1.41	287.498	-9999	-9999
1998	359	71700	72300	72000	72.75	4.33	-30.905	-9999	-29.34	1.565	281.387	-9999	-9999
1998	359	72300	72900	72600	70.75	4.07	-31.005	-9999	-29.18	1.825	280.86	-9999	-9999
1998	359	72900	73500	73200	73.75	4.125	-30.96	-9999	-29.295	1.665	275.393	-9999	-9999
1998	359	73500	74100	73800	74.5	3.99	-31.05	-9999	-29.41	1.64	269.07	-9999	-9999
1998	359	74100	74700	74400	72.65	4.015	-30.97	-9999	-29.445	1.525	254.057	-9999	-9999
1998	359	74700	75300	75000	75.9	3.66	-30.985	-9999	-29.56	1.425	264.557	-9999	-9999
1998	359	75300	75900	75600	73.85	3.815	-30.98	-9999	-29.385	1.595	258.611	-9999	-9999
1998	359	75900	76500	76200	69.75	4.06	-30.82	-9999	-29.055	1.765	253	-9999	-9999
1998	359	76500	77100	76800	70.4	4.055	-30.72	-9999	-29.3	1.42	249	-9999	-9999
1998	359	77100	77700	77400	72.8	4.185	-30.89	-9999	-29.355	1.535	260.8	-9999	-9999
1998	359	77700	78300	78000	71.05	3.84	-31.045	-9999	-29.52	1.525	259.983	-9999	-9999
1998	359	78300	78900	78600	65.7	4.205	-30.74	-9999	-29.33	1.41	261.79	-9999	-9999
1998	359	78900	79500	79200	65.85	3.84	-30.655	-9999	-29.42	1.235	263.597	-9999	-9999
1998	359	80700	81300	81000	52.3	5.255	-29.78	-9999	-28.445	1.335	238.56	-9999	-9999
1998	359	81300	81900	81600	52.75	5.425	-29.79	-9999	-28.245	1.545	214.253	-9999	-9999
[truncated: 309 more rows]
