# Supplementary material for: The meteorology and chemistry of high nitrogen oxide concentrations in the stable boundary layer at the South Pole
Source: Copernicus journal article supplement (doi:10.5194/acp-18-3755-2018), 2018-03-14
Supplement: Supplementary file 9 [file SODAR_1993.xls]

## Sheet: spo1993octnov_new_backup_a
Julian Day	Hour	Wind Speed (10 m)	Wind Direction (10 m)	Delta T (22 - 2 m)	Fractional Day	Scaled BLD	Corrected BLD		Note: Sodar Depth corrected for long pulse legth used in 1993
284	0	4.84	-40	0.9	284	170	155		Depth scaled to nearest 5 m.
284	1	4.4	-38	1.1	284.042	100	85
284	2	5.28	-37	1.3	284.083	40	25
284	3	5.72	-43	1.4	284.125	30	15
284	4	5.28	-49	1.3	284.167	50	35
284	5	3.52	-56	1	284.208	60	45
284	6	3.96	-61	1.1	284.25	60	45
284	7	3.52	-72	1	284.292	70	55
284	8	3.96	-78	1.1	284.333	60	45
284	9	3.96	-74	1.1	284.375	60	45
284	10	3.52	-78	0.9	284.417	50	35
284	11	3.08	-77	0.8	284.458	70	55
284	12	3.52	-86	0.8	284.5	45	30
284	13	3.52	-87	1	284.542	40	25
284	14	3.08	-88	1.2	284.583	40	25
284	15	2.64	-90	1.2	284.625	35	20
284	16	2.2	-92	1.4	284.667	35	20
284	17	1.76	-94	1.5	284.708	40	25
284	18	1.76	-92	1.1	284.75	45	30
284	19	1.32	-99	1.2	284.792	35	20
284	20	1.32	-90	1.2	284.833	30	15
284	21	2.2	-80	1.3	284.875	40	25
284	22	2.2	-70	2.2	284.917	30	15
284	23	2.2	-82	2.5	284.958	30	15
285	0	3.08	-73	1.8	285	50	35
285	1	3.08	-87	1.3	285.042	40	25
285	2	2.64	-77	1.2	285.083	40	25
285	3	3.08	-70	1.1	285.125	50	35
285	4	3.96	-84	0.9	285.167	70	55
285	5	3.08	-99	0.9	285.208	80	65
285	6	2.2	-113	1.3	285.25	60	45
285	7	2.2	-102	1.2	285.292	50	35
285	8	1.76	-115	0.9	285.333	40	25
285	9	1.32	-120	1	285.375	35	20
285	10	0.88	-108	1.2	285.417	40	25
285	11	1.32	-134	1.4	285.458	35	20
285	12	0	-135	1.2	285.5	40	25
285	13	0.44	180	1.1	285.542	40	25
285	14	3.08	158	1.9	285.583	25	10
285	15	3.08	148	3.1	285.625	25	10
285	16	4.4	139	2.5	285.667	25	10
285	17	3.96	135	3.5	285.708	40	25
285	18	4.4	137	3.1	285.75	50	35
285	19	4.4	128	2	285.792	50	35
285	20	3.96	123	0.8	285.833	70	55
285	21	4.4	132	2.4	285.875	70	55
285	22	4.84	129	1.2	285.917	70	55
285	23	4.84	120	1	285.958	70	55
286	0	4.84	122	1.6	286	50	35
286	1	5.28	122	1.7	286.042	40	25
286	2	6.16	125	1.7	286.083	50	35
286	3	5.72	120	1.8	286.125	40	25
286	4	5.72	123	2.8	286.167	35	20
286	5	5.72	122	2.9	286.208	35	20
286	6	6.6	117	3.6	286.25	40	25
286	7	5.28	108	2.8	286.292	40	25
286	8	5.28	101	3.2	286.333	40	25
286	9	5.72	100	3.4	286.375	40	25
286	10	5.28	99	3.8	286.417	50	35
286	11	5.28	96	3.1	286.458	50	35
286	12	5.72	99	3.3	286.5	60	45
286	13	4.84	95	3.2	286.542	55	40
286	14	4.84	94	3.4	286.583	50	35
286	15	4.4	86	2.5	286.625	60	45
286	16	4.84	86	1.9	286.667	60	45
286	17	5.72	80	1.7	286.708	60	45
286	18	7.04	86	1.4	286.75	60	45
286	19	7.04	84	0.1	286.792	60	45
286	20	6.6	87	-0.1	286.833	60	45
286	21	6.6	88	0.4	286.875	65	50
286	22	5.72	86	0.7	286.917	70	55
286	23	6.6	83	0.1	286.958	70	55
287	0	6.6	80	0.1	287	80	65
287	1	6.6	74	-0.3	287.042	85	70
287	2	6.16	71	-0.2	287.083	90	75
287	3	6.16	72	-0.3	287.125	90	75
287	4	5.72	73	0.4	287.167	60	45
287	5	5.28	72	1.9	287.208	75	60
287	6	5.28	78	2.1	287.25	70	55
287	7	4.84	80	2.5	287.292	60	45
287	8	4.4	81	2.9	287.333	60	45
287	9	4.84	79	3.3	287.375	45	30
287	10	5.28	69	4	287.417	60	45
287	11	4.4	72	4.9	287.458	40	25
287	12	3.52	80	3.9	287.5	35	20
287	13	4.4	69	5.6	287.542	30	15
287	14	3.08	82	6	287.583	30	15
287	15	2.64	81	5.3	287.625	30	15
287	16	2.2	92	4.4	287.667	30	15
287	17	3.08	97	3.5	287.708	30	15
287	18	3.08	100	3.6	287.75	30	15
287	19	3.96	90	3.9	287.792	25	10
287	20	3.96	89	3.3	287.833	25	10
287	21	3.96	101	2.9	287.875	25	10
287	22	3.52	105	3.8	287.917	35	20
287	23	3.08	104	1.9	287.958	40	25
288	0	3.96	94	4.4	288	30	15
288	1	3.96	95	4.1	288.042	35	20
288	2	3.96	107	4.2	288.083	40	25
288	3	4.4	105	5	288.125	40	25
288	4	3.96	93	4.8	288.167	35	20
288	5	4.4	85	4.4	288.208	40	25
288	6	3.96	89	4.4	288.25	35	20
288	7	3.96	91	4.1	288.292	40	25
288	8	3.52	95	4.7	288.333	35	20
288	9	3.52	98	5	288.375	40	25
289	0	2.64	94	8	289	25	10
289	1	2.64	96	5.1	289.042	25	10
289	2	2.64	104	6	289.083	25	10
289	3	2.64	102	6.8	289.125	30	15
289	4	2.64	91	5.6	289.167	30	15
289	5	1.76	94	3.8	289.208	30	15
289	6	2.2	103	4.2	289.25	30	15
289	7	2.2	103	4.2	289.292	30	15
289	8	3.52	98	5.8	289.333	40	25
289	9	2.64	102	5	289.375	40	25
289	10	3.52	100	6.5	289.417	50	35
289	11	2.64	117	4.2	289.458	50	35
289	12	2.64	98	4.6	289.5	45	30
289	13	2.64	77	3.3	289.542	40	25
289	14	1.76	97	2.3	289.583	40	25
289	15	2.64	111	3.1	289.625	40	25
289	16	2.64	90	3.2	289.667	35	20
289	17	3.08	84	2.9	289.708	40	25
289	18	2.64	98	2.5	289.75	50	35
289	19	2.64	98	2.8	289.792	50	35
289	20	2.2	93	2.1	289.833	50	35
289	21	2.2	78	1.8	289.875	50	35
289	22	1.76	82	1.9	289.917	40	25
289	23	3.52	83	3	289.958	40	25
290	0	4.4	77	4.5	290	40	25
290	1	3.96	80	4.3	290.042	40	25
290	2	4.84	74	5.4	290.083	50	35
290	3	5.28	79	5.5	290.125	50	35
290	4	4.4	78	4.4	290.167	45	30
290	5	3.96	81	4	290.208	55	40
290	6	4.84	74	3.8	290.25	45	30
290	7	4.4	79	3.1	290.292	45	30
290	8	3.52	73	2	290.333	50	35
290	9	4.84	81	3	290.375	60	45
290	10	4.84	83	3.7	290.417	60	45
290	11	4.84	83	4.4	290.458	60	45
290	12	4.84	76	4.6	290.5	60	45
290	13	3.52	80	4	290.542	60	45
290	14	4.4	82	4	290.583	60	45
290	15	4.4	83	3	290.625	60	45
290	16	4.4	84	2.7	290.667	50	35
290	17	5.28	77	2.6	290.708	60	45
290	18	4.84	80	1.4	290.75	60	45
290	19	3.96	96	1	290.792	60	45
290	20	3.96	100	2.1	290.833	60	45
290	21	3.52	104	1.8	290.875	60	45
292	9	4.84	114	0.9	292.375	45	30
292	10	5.72	120	0.8	292.417	35	20
292	11	6.16	123	1.4	292.458	45	30
292	12	5.28	123	1	292.5	60	45
292	13	5.28	124	1.5	292.542	50	35
292	14	5.28	122	1.4	292.583	40	25
292	15	5.28	123	1.1	292.625	40	25
292	16	6.6	131	1	292.667	35	20
292	17	6.16	138	0.1	292.708	45	30
292	18	5.28	142	-0.1	292.75	70	55
292	19	5.72	141	-0.7	292.792	75	60
292	20	6.6	139	-0.1	292.833	70	55
292	21	7.48	136	0	292.875	60	45
292	22	7.48	129	0.2	292.917	60	45
292	23	6.6	124	0.1	292.958	65	50
293	0	7.04	122	0.2	293	60	45
293	1	5.28	121	0.2	293.042	70	55
293	2	7.48	127	0.1	293.083	50	35
293	3	7.48	122	0.3	293.125	60	45
293	4	6.6	120	0.4	293.167	70	55
293	5	6.16	118	0.8	293.208	50	35
293	6	5.72	121	0.8	293.25	50	35
293	7	4.4	120	0.8	293.292	40	25
293	8	2.64	116	0.8	293.333	45	30
293	9	3.08	117	0.8	293.375	50	35
293	10	4.4	118	0.7	293.417	60	45
293	11	4.4	118	1.2	293.458	60	45
293	12	5.72	117	1.6	293.5	65	50
293	13	6.16	117	1.7	293.542	50	35
293	14	6.16	113	1.6	293.583	45	30
293	15	6.16	111	1.3	293.625	40	25
293	16	7.04	108	1.2	293.667	40	25
293	17	7.04	118	0.7	293.708	60	45
293	18	5.28	131	0.5	293.75	70	55
293	19	5.28	123	0.3	293.792	40	25
293	20	4.4	117	0	293.833	45	30
293	21	3.52	110	-0.1	293.875	50	35
293	22	3.52	109	0.4	293.917	50	35
293	23	3.96	104	0.5	293.958	40	25
294	0	3.96	108	0.9	294	40	25
294	1	4.4	108	1.3	294.042	30	15
294	2	4.84	111	1.7	294.083	30	15
294	3	4.4	107	2.4	294.125	30	15
294	4	4.4	104	1.9	294.167	60	45
294	5	4.4	94	2.2	294.208	50	35
294	6	4.84	84	1.8	294.25	30	15
294	7	3.96	81	1.3	294.292	40	25
294	8	4.4	82	1	294.333	40	25
294	9	3.08	103	1.2	294.375	80	65
294	10	3.52	94	2.3	294.417	70	55
294	11	3.96	92	2.6	294.458	50	35
294	12	4.4	85	3.1	294.5	50	35
294	13	5.28	77	2.7	294.542	40	25
294	14	4.84	76	2.7	294.583	40	25
294	15	5.28	71	3.3	294.625	40	25
294	16	4.84	69	3.1	294.667	40	25
294	17	4.4	71	2.6	294.708	40	25
294	18	5.28	60	1.9	294.75	40	25
294	19	4.84	65	1.9	294.792	50	35
294	20	3.52	72	1.3	294.833	50	35
294	21	3.96	71	1.6	294.875	50	35
294	22	3.52	72	2.4	294.917	50	35
294	23	4.84	56	2.7	294.958	35	20
295	0	3.96	59	2.6	295	40	25
295	1	3.08	62	2.4	295.042	40	25
295	2	4.4	57	3.4	295.083	40	25
295	3	4.4	53	3.2	295.125	35	20
295	4	3.96	43	3.3	295.167	45	30
295	5	3.08	47	3.7	295.208	50	35
295	6	4.4	37	2	295.25	50	35
295	7	5.72	29	0.8	295.292	40	25
295	8	6.6	25	0.9	295.333	40	25
295	9	6.16	22	0.8	295.375	40	25
295	10	8.36	19	0.8	295.417	35	20
295	11	7.92	18	0.9	295.458	35	20
295	12	7.48	15	1	295.5	35	20
295	13	7.48	16	0.8	295.542	35	20
295	14	7.48	18	0.9	295.583	50	35
295	15	7.04	18	0.9	295.625	50	35
295	16	7.92	13	0.8	295.667	40	25
295	17	8.36	12	0.5	295.708	30	15
295	18	7.48	11	0.4	295.75	30	15
295	19	6.6	12	0.1	295.792	30	15
295	20	7.04	13	0.2	295.833	30	15
295	21	7.48	10	0.1	295.875	35	20
295	22	7.48	9	0.4	295.917	60	45
295	23	8.36	8	0.5	295.958	50	35
296	0	8.36	7	0.5	296	50	35
296	1	7.04	2	0.4	296.042	50	35
296	2	6.6	2	0.2	296.083	40	25
296	3	7.48	2	-0.1	296.125	50	35
296	4	8.36	0	-0.2	296.167	70	55
296	5	8.36	-4	-0.5	296.208	70	55
296	6	8.36	-3	-0.5	296.25	85	70
296	7	8.36	-5	-0.5	296.292	90	75
296	8	7.92	-6	-0.6	296.333	100	85
296	9	8.36	-6	-0.4	296.375	100	85
296	10	8.8	-8	-0.4	296.417	100	85
296	11	8.36	-10	-0.3	296.458	100	85
296	12	7.04	-8	-0.2	296.5	100	85
296	13	7.04	-5	-0.3	296.542	90	75
296	14	7.92	-3	-0.3	296.583	80	65
296	15	7.48	-3	-0.3	296.625	90	75
296	16	7.04	0	-0.3	296.667	100	85
296	17	6.6	3	-0.3	296.708	90	75
296	18	6.6	4	-0.3	296.75	80	65
296	19	7.04	5	-0.4	296.792	75	60
296	20	7.04	3	-0.3	296.833	70	55
296	21	7.04	2	-0.3	296.875	70	55
296	22	5.72	4	-0.3	296.917	65	50
296	23	4.84	8	-0.2	296.958	65	50
297	0	4.4	17	-0.2	297	70	55
297	1	5.28	20	0	297.042	70	55
297	2	5.28	26	-0.2	297.083	65	50
297	3	3.96	41	-0.2	297.125	80	65
297	4	3.96	47	-0.2	297.167	75	60
297	5	4.84	38	-0.2	297.208	60	45
297	6	4.84	44	-0.3	297.25	70	55
297	7	4.4	45	-0.3	297.292	70	55
297	8	3.96	50	-0.3	297.333	75	60
297	9	4.4	46	-0.2	297.375	85	70
297	10	5.28	47	-0.2	297.417	90	75
297	11	5.28	45	-0.2	297.458	110	95
297	12	5.28	47	-0.1	297.5	110	95
297	13	4.4	55	0.1	297.542	120	105
297	14	4.84	59	0.2	297.583	100	85
297	15	5.72	57	0.3	297.625	90	75
297	16	5.28	57	0.3	297.667	70	55
297	17	5.72	59	-0.1	297.708	70	55
297	18	5.72	50	0	297.75	70	55
297	19	5.72	53	-0.2	297.792	60	45
297	20	5.28	51	-0.2	297.833	60	45
297	21	5.28	49	-0.2	297.875	70	55
297	22	7.04	40	0.2	297.917	60	45
297	23	7.04	37	0.1	297.958	60	45
298	0	7.92	35	-0.1	298	60	45
298	1	7.92	38	-0.1	298.042	70	55
298	2	7.48	40	-0.1	298.083	70	55
298	3	7.04	42	0.1	298.125	70	55
298	4	6.6	49	0.2	298.167	70	55
298	5	6.16	49	0.6	298.208	65	50
300	10	6.16	30	0.2	300.417	50	35
300	11	6.16	34	0.3	300.458	50	35
300	12	4.84	44	0.2	300.5	60	45
300	13	4.4	44	0.1	300.542	60	45
300	14	6.16	41	0.3	300.583	50	35
300	15	5.28	45	0.2	300.625	55	40
300	16	5.28	40	0.3	300.667	50	35
300	17	4.84	43	-0.1	300.708	60	45
300	18	4.84	46	0.4	300.75	60	45
300	19	4.4	51	0.5	300.792	70	55
300	20	3.96	47	0.3	300.833	80	65
300	21	4.84	50	0.2	300.875	60	45
300	22	5.28	50	0.9	300.917	60	45
300	23	4.84	45	0.5	300.958	80	65
301	0	5.72	37	0	301	100	85
301	1	5.28	45	0.1	301.042	90	75
301	2	6.16	38	-0.2	301.083	60	45
301	3	6.16	35	-0.1	301.125	70	55
301	4	5.28	43	0.2	301.167	70	55
301	5	4.4	52	0.8	301.208	80	65
301	6	4.4	52	0.9	301.25	80	65
301	7	4.84	55	0.9	301.292	80	65
301	8	5.28	55	0.9	301.333	70	55
301	9	3.52	63	1	301.375	100	85
301	10	3.52	62	0.7	301.417	70	55
301	11	4.4	62	0.8	301.458	80	65
301	12	5.72	58	0.6	301.5	75	60
301	13	6.16	55	0.4	301.542	70	55
301	14	5.72	50	0.4	301.583	80	65
301	15	5.28	53	0.6	301.625	80	65
301	16	4.84	58	1	301.667	75	60
301	17	5.28	51	0.2	301.708	100	85
301	18	5.28	45	0.2	301.75	100	85
301	19	7.92	26	0	301.792	80	65
301	20	7.04	40	-0.1	301.833	75	60
301	21	8.36	32	-0.1	301.875	70	55
301	22	8.36	36	0	301.917	75	60
301	23	9.68	39	0.1	301.958	75	60
303	5	7.04	0	1.6	303.208	70	55
303	6	7.04	-2	1.4	303.25	70	55
303	7	7.92	0	1.1	303.292	70	55
303	8	7.48	1	1.2	303.333	80	65
303	9	7.04	3	1.1	303.375	90	75
303	10	7.48	8	0.9	303.417	110	95
303	11	7.48	7	0.7	303.458	110	95
303	12	7.92	3	0.7	303.5	110	95
303	13	8.36	2	0.7	303.542	110	95
303	14	8.36	1	0.4	303.583	110	95
303	15	7.92	-1	0.6	303.625	130	115
303	16	7.48	-3	1	303.667	140	125
303	17	7.04	-1	1.1	303.708	150	135
303	18	7.92	-6	1.2	303.75	130	115
303	19	7.48	-3	0.9	303.792	130	115
303	20	7.48	-2	0.8	303.833	130	115
303	21	7.04	1	0.7	303.875	150	135
303	22	7.48	-5	0.7	303.917	150	135
303	23	7.04	-6	0.5	303.958	140	125
304	0	7.92	-2	0.4	304	120	105
304	1	7.92	-1	0.1	304.042	110	95
304	2	7.92	0	0	304.083	110	95
304	3	7.48	1	0	304.125	120	105
304	4	7.04	3	-0.1	304.167	120	105
304	5	7.48	-3	0	304.208	110	95
304	6	7.04	-3	-0.1	304.25	110	95
304	7	6.6	5	-0.1	304.292	130	115
304	8	7.48	5	-0.3	304.333	110	95
304	9	6.6	4	-0.1	304.375	120	105
304	10	7.04	6	-0.1	304.417	110	95
304	11	7.04	5	0	304.458	110	95
304	12	7.04	3	-0.1	304.5	100	85
304	13	6.6	5	-0.1	304.542	100	85
304	14	6.6	2	0.2	304.583	85	70
304	15	6.6	0	0.3	304.625	75	60
304	16	6.16	0	0.4	304.667	80	65
304	17	4.4	20	-0.1	304.708	100	85
304	18	3.96	28	-0.2	304.75	115	100
304	19	5.72	12	-0.1	304.792	110	95
304	20	7.04	0	0	304.833	80	65
304	21	7.48	-1	-0.1	304.875	80	65
304	22	7.48	0	-0.1	304.917	100	85
304	23	7.48	1	0	304.958	100	85
305	0	7.48	-2	-0.2	305	50	35
305	1	7.92	-3	-0.1	305.042	70	55
305	2	7.48	-6	0.2	305.083	140	125
305	3	7.48	-8	0.2	305.125	130	115
305	4	7.48	-7	0.2	305.167	130	115
305	5	7.04	-7	0.1	305.208	120	105
305	6	7.04	-8	0	305.25	100	85
305	7	7.48	-9	-0.1	305.292	140	125
305	8	7.48	-6	-0.1	305.333	140	125
305	9	7.92	-6	-0.1	305.375	130	115
305	10	7.48	-5	-0.1	305.417	120	105
305	11	7.48	-1	-0.1	305.458	100	85
305	12	7.48	-2	-0.2	305.5	90	75
305	13	7.04	-2	-0.2	305.542	90	75
305	14	6.6	-1	-0.2	305.583	80	65
305	15	6.6	1	-0.1	305.625	80	65
305	16	6.6	3	-0.2	305.667	110	95
305	17	7.48	2	-0.2	305.708	110	95
305	18	7.48	0	-0.2	305.75	90	75
305	19	7.92	-4	-0.3	305.792	80	65
306	4	5.72	3	0.1	306.167	25	10
306	5	6.6	8	0.3	306.208	25	10
306	6	5.28	14	0.1	306.25	35	20
306	7	4.84	16	-0.1	306.292	45	30
306	8	4.84	19	-0.1	306.333	50	35
306	9	4.84	19	-0.2	306.375	60	45
306	10	5.28	22	-0.3	306.417	70	55
306	11	6.16	20	-0.3	306.458	70	55
306	12	5.28	22	-0.3	306.5	80	65
306	13	5.72	16	-0.2	306.542	60	45
306	14	5.28	28	-0.3	306.583	70	55
306	15	5.72	31	-0.3	306.625	60	45
306	16	6.16	24	-0.2	306.667	50	35
306	17	5.72	23	-0.6	306.708	60	45
306	18	5.72	22	-0.4	306.75	60	45
306	19	5.28	28	-0.6	306.792	60	45
306	20	5.28	32	-0.6	306.833	60	45
306	21	5.72	30	-0.6	306.875	50	35
306	22	4.84	28	-0.4	306.917	50	35
306	23	4.4	35	-0.2	306.958	60	45
308	0	4.84	21	-0.1	308	65	50
308	1	5.28	16	-0.2	308.042	60	45
308	2	5.72	14	-0.3	308.083	60	45
308	3	5.28	13	-0.2	308.125	70	55
308	4	4.4	20	-0.6	308.167	80	65
308	5	5.28	14	-0.4	308.208	70	55
308	6	5.28	14	-0.3	308.25	75	60
308	7	5.28	15	-0.4	308.292	70	55
308	8	5.28	17	-0.4	308.333	90	75
308	9	4.84	12	-0.3	308.375	90	75
308	10	5.28	9	0	308.417	70	55
308	11	4.84	12	-0.1	308.458	80	65
308	12	5.28	13	0.1	308.5	80	65
308	13	5.72	13	0.3	308.542	80	65
308	14	6.16	14	0.1	308.583	80	65
308	15	6.16	10	0.1	308.625	75	60
308	16	6.16	4	-0.2	308.667	60	45
308	17	5.72	1	-0.4	308.708	70	55
308	18	4.84	12	-0.2	308.75	90	75
308	19	5.28	17	-0.4	308.792	100	85
308	20	5.72	13	-0.4	308.833	90	75
308	21	5.28	11	-0.5	308.875	70	55
308	22	5.28	9	-0.3	308.917	80	65
308	23	6.16	9	-0.3	308.958	65	50
309	0	6.16	9	-0.3	309	75	60
309	1	5.28	14	-0.3	309.042	90	75
309	2	4.84	19	-0.4	309.083	100	85
309	3	5.28	17	-0.4	309.125	90	75
309	4	5.28	17	-0.5	309.167	100	85
309	5	4.84	12	-0.4	309.208	80	65
309	6	4.84	21	-0.5	309.25	90	75
309	7	4.4	27	-0.5	309.292	110	95
309	8	4.4	30	-0.3	309.333	110	95
309	9	3.96	30	-0.3	309.375	100	85
309	10	3.96	39	-0.3	309.417	80	65
309	11	4.4	28	-0.2	309.458	80	65
309	12	4.4	32	-0.2	309.5	75	60
309	13	4.4	37	0	309.542	70	55
309	14	3.52	51	0.2	309.583	70	55
309	15	3.52	70	0.6	309.625	70	55
309	16	3.52	78	0.8	309.667	70	55
309	17	3.96	76	0.6	309.708	60	45
309	18	3.96	77	0.8	309.75	65	50
309	19	3.96	69	0.6	309.792	60	45
309	20	3.96	66	0.6	309.833	40	25
309	21	3.96	74	1	309.875	42	27
309	22	3.52	71	1	309.917	40	25
309	23	3.52	69	0.8	309.958	40	25
310	0	3.52	72	0.8	310	40	25
310	1	1.76	72	-0.1	310.042	50	35
310	2	2.2	77	0.1	310.083	50	35
310	3	2.2	82	0	310.125	55	40
310	4	3.08	76	0.6	310.167	65	50
310	5	3.08	72	1	310.208	60	45
310	6	3.08	82	1.2	310.25	55	40
310	7	3.52	82	1.5	310.292	50	35
310	8	3.08	75	1.2	310.333	60	45
310	9	3.52	66	1.5	310.375	50	35
310	10	3.96	67	1.9	310.417	45	30
310	11	3.08	60	1.1	310.458	45	30
310	12	3.08	52	0.8	310.5	45	30
310	13	2.64	48	0.4	310.542	40	25
310	14	2.2	58	0.8	310.583	45	30
310	15	2.64	51	0.2	310.625	50	35
310	16	2.64	60	0.5	310.667	55	40
310	17	3.52	63	0.9	310.708	50	35
310	18	3.08	58	0.6	310.75	50	35
310	19	3.08	59	0.4	310.792	50	35
310	20	2.64	67	0.2	310.833	45	30
310	21	3.08	58	0.4	310.875	45	30
310	22	3.08	47	0.7	310.917	45	30
310	23	3.96	36	0.3	310.958	45	30
311	0	3.52	31	0.1	311	40	25
311	1	3.52	31	0	311.042	40	25
311	2	3.96	25	-0.4	311.083	35	20
311	3	4.4	21	-0.1	311.125	35	20
311	4	3.52	28	-0.6	311.167	50	35
311	5	4.4	22	-0.3	311.208	40	25
311	6	4.4	21	-0.5	311.25	55	40
311	7	4.4	18	-0.3	311.292	65	50
311	8	3.96	19	-0.5	311.333	65	50
311	9	4.4	16	-0.5	311.375	75	60
311	10	5.28	10	-0.4	311.417	90	75
311	11	5.28	11	-0.5	311.458	80	65
311	12	4.4	12	-0.5	311.5	90	75
311	13	4.84	16	-0.6	311.542	115	100
311	14	5.72	11	-0.5	311.583	100	85
311	15	6.16	8	-0.5	311.625	90	75
311	16	6.6	6	-0.5	311.667	90	75
311	17	5.72	9	-0.6	311.708	90	75
311	18	6.16	10	-0.6	311.75	80	65
311	19	6.16	3	-0.6	311.792	80	65
311	20	6.16	5	-0.6	311.833	80	65
311	21	5.72	4	-0.4	311.875	80	65
311	22	5.28	4	-0.5	311.917	80	65
311	23	5.28	9	-0.2	311.958	75	60
312	0	3.52	17	0	312	70	55
312	1	4.4	19	0.1	312.042	60	45
312	2	3.96	26	-0.5	312.083	80	65
312	3	3.96	21	-0.5	312.125	110	95
312	4	4.4	14	-0.3	312.167	90	75
312	5	4.4	7	-0.3	312.208	90	75
312	6	3.96	5	-0.3	312.25	80	65
312	7	3.08	21	-0.6	312.292	70	55
312	8	2.64	38	-0.8	312.333	70	55
312	9	3.52	25	0	312.375	60	45
312	10	3.96	14	0.4	312.417	50	35
312	11	2.2	45	0.6	312.458	50	35
312	12	3.52	39	1.8	312.5	50	35
312	13	4.4	23	1.6	312.542	40	25
312	14	4.84	12	1.3	312.583	45	30
312	15	5.28	9	0.7	312.625	40	25
312	16	3.96	8	0.4	312.667	40	25
312	17	3.52	16	0.2	312.708	50	35
312	18	3.52	29	0.7	312.75	60	45
312	19	4.4	15	0.7	312.792	50	35
312	20	4.84	12	0.3	312.833	50	35
312	21	4.4	21	0.5	312.875	60	45
312	22	4.84	16	0.4	312.917	50	35
312	23	5.72	4	1.4	312.958	60	45
313	0	5.28	9	1.7	313	50	35
313	1	4.4	26	0.4	313.042	80	65
313	2	5.72	13	0.4	313.083	70	55
313	3	4.84	18	0.2	313.125	50	35
313	4	4.84	13	0.3	313.167	40	25
313	5	4.4	18	0.3	313.208	50	35
313	6	2.2	40	0.4	313.25	35	20
313	7	3.96	32	0.3	313.292	30	15
313	8	3.96	34	0	313.333	35	20
313	9	2.2	38	-0.5	313.375	40	25
313	10	3.52	39	0	313.417	30	15
313	11	3.52	34	-0.1	313.458	50	35
313	12	2.64	45	0.7	313.5	50	35
313	13	2.2	51	0.9	313.542	50	35
313	14	2.2	61	0.7	313.583	45	30
313	15	3.52	51	0.4	313.625	45	30
313	16	3.08	46	-0.2	313.667	40	25
313	17	2.2	52	0	313.708	50	35
313	18	2.64	69	0.2	313.75	50	35
313	19	3.08	57	0.2	313.792	45	30
313	20	3.08	52	0.5	313.833	40	25
313	21	3.08	49	0.3	313.875	50	35
313	22	3.96	52	0.9	313.917	40	25
313	23	3.52	50	0.4	313.958	45	30
314	0	3.08	48	0.1	314	50	35
314	1	3.96	44	0.1	314.042	55	40
314	2	3.52	31	-0.4	314.083	60	45
314	3	3.96	36	-0.3	314.125	65	50
314	4	3.96	45	-0.1	314.167	75	60
314	5	3.08	52	-0.1	314.208	90	75
314	6	3.52	48	-0.2	314.25	80	65
314	7	4.84	36	-0.2	314.292	70	55
314	8	4.84	39	0	314.333	80	65
314	9	6.16	37	0	314.375	75	60
314	10	5.28	37	-0.2	314.417	80	65
314	11	6.16	28	-0.2	314.458	70	55
314	12	7.48	23	-0.1	314.5	70	55
314	13	7.04	24	-0.2	314.542	70	55
314	14	7.04	28	-0.2	314.583	80	65
314	15	6.6	28	-0.2	314.625	95	80
314	16	6.16	27	-0.3	314.667	95	80
314	17	7.48	18	-0.3	314.708	95	80
314	18	7.48	19	-0.3	314.75	90	75
314	19	7.04	20	-0.4	314.792	85	70
314	20	6.16	22	-0.2	314.833	90	75
314	21	7.48	25	-0.2	314.875	90	75
314	22	7.04	21	-0.2	314.917	85	70
314	23	7.04	17	-0.1	314.958	90	75
315	0	6.6	11	-0.1	315	80	65
315	1	7.92	12	-0.2	315.042	60	45
315	2	7.92	13	-0.3	315.083	70	55
315	3	8.36	16	-0.3	315.125	75	60
315	4	8.36	15	-0.3	315.167	80	65
315	5	8.36	17	-0.3	315.208	90	75
315	6	7.92	16	-0.5	315.25	100	85
315	7	7.92	18	-0.4	315.292	110	95
315	8	7.92	16	-0.3	315.333	110	95
315	9	8.36	17	-0.3	315.375	100	85
315	10	8.36	16	-0.2	315.417	95	80
315	11	8.8	18	-0.2	315.458	105	90
315	12	9.24	19	0	315.5	110	95
315	13	9.24	18	-0.1	315.542	100	85
315	14	8.8	20	-0.2	315.583	100	85
315	15	8.8	19	-0.1	315.625	105	90
315	16	9.24	20	-0.1	315.667	120	105
315	17	9.24	21	-0.4	315.708	125	110
315	18	9.68	20	-0.3	315.75	120	105
315	19	8.8	18	-0.3	315.792	125	110
315	20	9.24	20	-0.3	315.833	130	115
315	21	8.8	20	-0.3	315.875	130	115
315	22	9.24	23	0	315.917	135	120
315	23	10.12	25	0	315.958	140	125
317	0	5.72	3	0.3	317	100	85
317	1	5.28	1	0.3	317.042	80	65
317	2	4.84	2	0.5	317.083	80	65
317	3	4.4	2	1	317.125	70	55
317	4	4.4	4	0.5	317.167	60	45
317	5	4.4	3	-0.1	317.208	60	45
317	6	4.4	4	0	317.25	50	35
317	7	3.96	6	0.1	317.292	40	25
317	8	3.52	13	0.5	317.333	30	15
317	9	3.96	16	0.7	317.375	30	15
317	10	4.84	13	1.1	317.417	30	15
317	11	3.52	34	0.6	317.458	35	20
317	12	3.08	39	1.7	317.5	30	15
317	13	2.2	53	1	317.542	35	20
317	14	2.64	66	1	317.583	30	15
317	15	3.08	68	0.5	317.625	35	20
317	16	2.64	69	0.8	317.667	30	15
317	17	3.52	62	1.8	317.708	30	15
317	18	3.08	84	2.3	317.75	35	20
317	19	3.52	102	3.2	317.792	40	25
317	20	3.52	93	2.5	317.833	40	25
317	21	2.64	100	1.8	317.875	35	20
317	22	3.52	129	3.8	317.917	30	15
317	23	3.08	126	1.6	317.958	40	25
318	0	3.08	119	1.6	318	50	35
318	1	3.08	111	2.8	318.042	50	35
318	2	3.52	100	2.5	318.083	40	25
318	3	3.96	84	2.3	318.125	40	25
318	4	3.96	83	1.9	318.167	40	25
318	5	4.4	78	1.8	318.208	40	25
318	6	4.4	74	1.6	318.25	40	25
318	7	4.84	65	1.1	318.292	70	55
318	8	5.72	56	0.3	318.333	70	55
318	9	5.72	52	0	318.375	75	60
318	10	5.72	51	0	318.417	80	65
318	11	5.72	40	-0.1	318.458	80	65
318	12	7.04	10	-0.4	318.5	90	75
318	13	5.72	31	-0.4	318.542	90	75
318	14	6.16	47	-0.3	318.583	100	85
318	15	6.16	29	-0.4	318.625	110	95
318	16	6.6	35	-0.6	318.667	120	105
318	17	7.04	29	-0.7	318.708	100	85
318	18	6.6	33	-0.7	318.75	90	75
318	19	7.04	38	-0.7	318.792	80	65
318	20	7.04	35	-0.6	318.833	100	85
318	21	8.36	31	-0.6	318.875	150	135
318	22	8.8	26	-0.6	318.917	125	110
318	23	8.36	24	-0.6	318.958	115	100
319	0	9.24	27	-0.6	319	110	95
319	1	9.68	23	-0.6	319.042	110	95
319	2	10.56	22	-0.6	319.083	90	75
319	3	10.56	25	-0.6	319.125	120	105
319	4	10.12	16	-0.6	319.167	130	115
319	5	9.68	10	-0.6	319.208	180	165
319	6	9.24	9	-0.5	319.25	200	185
319	7	9.24	7	-0.4	319.292	200	185
319	8	8.36	8	-0.4	319.333	180	165
319	9	7.92	9	-0.4	319.375	180	165
319	10	7.04	2	-0.4	319.417	200	185
319	11	6.6	2	-0.3	319.458	170	155
319	12	6.16	3	-0.2	319.5	70	55
319	13	5.72	1	-0.2	319.542	70	55
319	14	4.84	1	-0.2	319.583	70	55
319	15	4.4	4	-0.2	319.625	40	25
319	16	4.4	4	-0.1	319.667	35	20
319	17	4.4	5	0.4	319.708	45	30
319	18	4.4	4	0.3	319.75	50	35
319	19	4.4	7	-0.2	319.792	65	50
319	20	3.52	14	-0.2	319.833	60	45
319	21	2.2	9	-0.6	319.875	30	15
319	22	1.76	8	0.2	319.917	30	15
319	23	1.76	43	2.4	319.958	30	15
320	0	2.2	45	4.1	320	30	15
320	1	3.08	52	3.4	320.042	30	15
320	2	2.64	67	3.9	320.083	30	15
320	3	3.08	69	3.8	320.125	30	15
320	4	3.08	73	3.1	320.167	30	15
320	5	3.08	73	3.1	320.208	30	15
320	6	3.52	72	3.9	320.25	30	15
320	7	3.08	77	2.8	320.292	30	15
320	8	2.2	95	2.3	320.333	35	20
320	9	2.2	115	1.4	320.375	50	35
320	10	3.52	100	2.4	320.417	60	45
320	11	2.64	97	1.4	320.458	50	35
320	12	2.64	101	1.7	320.5	55	40
320	13	3.08	90	1.8	320.542	50	35
320	14	3.52	82	2	320.583	40	25
320	15	3.52	79	1.8	320.625	40	25
320	16	3.52	79	2.2	320.667	40	25
320	17	3.96	75	1.7	320.708	35	20
320	18	3.52	75	1.6	320.75	45	30
320	19	4.4	61	1.6	320.792	30	15
320	20	3.52	47	0.7	320.833	30	15
320	21	3.08	44	0.6	320.875	40	25
320	22	3.08	46	0.1	320.917	40	25
320	23	3.52	45	0.2	320.958	45	30
321	0	3.08	31	0.3	321	40	25
321	1	4.4	14	0.1	321.042	60	45
321	2	3.08	27	-0.3	321.083	80	65
321	3	3.96	16	-0.3	321.125	65	50
321	4	3.96	17	-0.2	321.167	60	45
321	5	3.96	14	-0.1	321.208	60	45
321	6	4.84	10	0.1	321.25	60	45
321	7	4.84	14	0	321.292	60	45
321	8	5.28	5	0.1	321.333	60	45
321	9	6.16	2	0.1	321.375	50	35
321	10	6.16	2	0.2	321.417	50	35
321	11	5.72	2	0	321.458	50	35
321	12	6.16	0	0.1	321.5	40	25
321	13	6.6	1	0	321.542	40	25
321	14	6.16	-1	0	321.583	40	25
321	15	6.16	-4	0.1	321.625	60	45
321	16	4.4	9	-0.2	321.667	60	45
321	17	4.84	3	-0.2	321.708	60	45
321	18	5.28	6	-0.1	321.75	65	50
321	19	5.28	6	0.1	321.792	60	45
321	20	5.72	7	0.2	321.833	50	35
321	21	6.16	9	0	321.875	60	45
321	22	6.6	4	0.5	321.917	50	35
321	23	5.72	4	0.3	321.958	45	30
322	0	4.84	16	0.2	322	60	45
322	1	5.72	17	0.2	322.042	40	25
322	2	5.72	10	0.3	322.083	50	35
322	3	4.84	15	0.2	322.125	45	30
322	4	5.28	22	0.5	322.167	45	30
322	5	5.72	20	0.6	322.208	40	25
322	6	5.72	19	0.7	322.25	40	25
322	7	5.28	29	0.7	322.292	45	30
322	8	5.72	22	1.4	322.333	40	25
322	9	3.96	38	0.5	322.375	60	45
322	10	3.96	39	1.1	322.417	50	35
322	11	3.08	42	0.6	322.458	50	35
322	12	2.2	51	1.1	322.5	45	30
322	13	4.84	30	1.1	322.542	50	35
322	14	3.96	38	0.7	322.583	50	35
322	15	4.4	37	0.6	322.625	50	35
322	16	5.28	36	1.2	322.667	45	30
322	17	4.4	37	0.8	322.708	50	35
322	18	5.28	37	0.8	322.75	50	35
322	19	5.72	35	0.7	322.792	55	40
322	20	4.4	39	0.5	322.833	60	45
322	21	5.28	36	0.3	322.875	60	45
322	22	5.72	38	0.7	322.917	60	45
322	23	5.72	33	0.6	322.958	60	45
323	0	6.6	32	0.5	323	65	50
323	1	6.16	39	0.6	323.042	60	45
323	2	4.4	53	0.7	323.083	60	45
323	3	5.72	46	0.7	323.125	50	35
323	4	6.16	50	0.6	323.167	45	30
323	5	5.72	59	0.8	323.208	60	45
323	6	5.28	68	0.8	323.25	40	25
323	7	5.72	69	1.2	323.292	50	35
323	8	4.84	81	1.3	323.333	60	45
323	9	4.84	83	1.8	323.375	70	55
323	10	5.28	78	1	323.417	80	65
323	11	5.28	71	0.7	323.458	80	65
323	12	4.4	74	0.6	323.5	90	75
323	15	4.84	69	0.8	323.625	120	105
323	16	5.72	69	0.7	323.667	120	105
323	17	6.16	62	0.3	323.708	110	95
323	18	4.84	68	0.2	323.75	100	85
323	19	5.28	66	0.1	323.792	110	95
323	20	5.28	71	0	323.833	100	85
323	21	4.4	73	0.1	323.875	100	85
323	22	4.84	71	0.3	323.917	95	80
323	23	4.4	71	0.1	323.958	90	75
324	0	4.84	68	0	324	100	85
324	1	5.28	65	-0.1	324.042	100	85
324	2	5.28	64	-0.2	324.083	120	105
324	3	4.4	61	-0.1	324.125	140	125
324	4	5.28	61	-0.1	324.167	130	115
324	5	4.84	56	0.1	324.208	130	115
324	6	4.84	52	0.1	324.25	110	95
324	7	5.72	45	0.2	324.292	100	85
324	8	5.72	50	0.3	324.333	90	75
324	9	5.72	48	0.4	324.375	90	75
324	10	4.84	47	0.3	324.417	110	95
324	11	4.84	50	0.4	324.458	100	85
324	12	5.28	45	0.3	324.5	90	75
324	13	5.28	42	0.3	324.542	100	85
324	14	5.28	42	0.3	324.583	90	75
324	15	5.28	42	0.2	324.625	80	65
324	16	4.84	40	0	324.667	80	65
324	17	4.84	41	-0.2	324.708	80	65
324	18	5.28	29	-0.1	324.75	70	55
324	19	5.28	34	-0.1	324.792	70	55
324	20	4.84	36	-0.3	324.833	70	55
324	21	4.4	38	-0.3	324.875	60	45
324	22	3.96	42	0.1	324.917	50	35
324	23	4.4	48	0.3	324.958	45	30
325	0	3.52	43	0.2	325	50	35
325	1	3.52	50	0.1	325.042	40	25
325	2	3.96	53	0.1	325.083	40	25
325	3	3.96	58	0.2	325.125	35	20
325	4	3.96	62	0.2	325.167	40	25
325	5	3.96	67	0.3	325.208	50	35
325	6	3.52	75	0.4	325.25	75	60
325	7	3.96	72	0.6	325.292	70	55
325	8	3.96	72	0.8	325.333	50	35
325	9	3.96	76	1	325.375	50	35
325	10	2.64	92	0.9	325.417	60	45
325	11	3.52	77	1.1	325.458	65	50
325	12	3.52	75	1	325.5	50	35
325	13	3.96	75	1	325.542	55	40
325	14	3.96	74	0.7	325.583	50	35
325	15	2.64	77	0.5	325.625	60	45
325	16	3.52	75	0.7	325.667	60	45
325	17	3.08	74	0.1	325.708	60	45
325	18	3.08	71	0.3	325.75	60	45
325	19	3.96	66	0.5	325.792	55	40
325	20	3.08	73	0.3	325.833	60	45
325	21	3.52	72	0.4	325.875	65	50
325	22	3.96	63	0.6	325.917	50	35
325	23	4.4	60	0.6	325.958	55	40
326	0	3.52	59	0.5	326	65	50
326	1	3.96	59	0.6	326.042	70	55
326	2	3.08	56	1.1	326.083	70	55
326	3	3.52	61	1.1	326.125	70	55
326	4	3.52	59	0.8	326.167	65	50
327	2	3.96	60	0.5	327.083	60	45
327	3	3.96	60	0.5	327.125	55	40
327	4	3.96	65	0.6	327.167	50	35
327	5	3.96	69	0.5	327.208	45	30
327	6	3.52	72	0.6	327.25	40	25
327	7	3.52	74	0.7	327.292	40	25
327	8	3.08	79	0.7	327.333	50	35
327	9	3.08	84	1	327.375	60	45
327	10	3.08	83	1	327.417	60	45
327	11	3.52	76	1	327.458	45	30
327	12	3.08	80	0.7	327.5	50	35
327	13	2.64	82	0.6	327.542	55	40
327	14	3.08	79	0.9	327.583	45	30
327	15	3.08	73	0.9	327.625	50	35
327	16	3.08	76	0.9	327.667	50	35
327	17	2.64	75	0.5	327.708	60	45
327	18	2.64	80	0.5	327.75	50	35
327	19	1.76	83	0.2	327.792	45	30
327	20	3.08	78	0.7	327.833	50	35
327	21	2.64	82	0.7	327.875	40	25
327	22	2.64	92	1.3	327.917	45	30
327	23	3.08	85	1.2	327.958	50	35
328	0	3.08	96	1.2	328	40	25
328	1	3.52	100	1	328.042	45	30
328	2	3.08	100	0.1	328.083	60	45
328	3	3.08	98	0.3	328.125	65	50
328	4	3.08	90	0.3	328.167	50	35
328	5	3.08	83	0.5	328.208	50	35
328	6	3.08	73	0.5	328.25	60	45
328	7	3.08	69	0.6	328.292	60	45
328	8	3.08	69	0.6	328.333	50	35
328	9	3.08	64	0.7	328.375	40	25
328	10	3.52	58	0.7	328.417	35	20
328	11	4.4	49	0.6	328.458	45	30
328	12	3.96	53	0.5	328.5	70	55
328	13	3.52	44	0.3	328.542	80	65
328	14	3.96	40	0.2	328.583	110	95
328	15	4.84	31	0.2	328.625	80	65
328	16	4.84	26	0.1	328.667	100	85
328	17	4.84	24	-0.1	328.708	95	80
328	18	5.72	21	0	328.75	110	95
328	19	5.72	20	-0.2	328.792	80	65
328	20	5.72	17	-0.3	328.833	70	55
328	21	5.72	20	-0.4	328.875	55	40
328	22	5.72	20	-0.4	328.917	60	45
328	23	6.16	22	-0.3	328.958	70	55
329	0	6.6	23	-0.4	329	80	65
329	1	6.6	28	-0.4	329.042	80	65
329	2	7.04	30	-0.5	329.083	90	75
329	3	7.48	27	-0.6	329.125	85	70
329	4	7.48	23	-0.4	329.167	90	75
329	5	6.6	21	-0.3	329.208	100	85
329	6	6.6	21	-0.3	329.25	90	75
329	7	6.6	20	-0.2	329.292	110	95
329	8	6.6	15	-0.3	329.333	120	105
329	9	6.6	12	-0.3	329.375	120	105
329	10	6.6	18	-0.2	329.417	110	95
329	11	6.6	12	-0.2	329.458	80	65
329	12	6.16	12	0	329.5	90	75
329	13	6.6	8	-0.1	329.542	60	45
329	14	7.04	13	0	329.583	50	35
329	15	7.04	14	-0.1	329.625	60	45
329	16	6.6	8	-0.5	329.667	110	95
329	17	6.16	3	-0.5	329.708	150	135
329	18	7.04	-2	-0.4	329.75	200	185
329	19	7.04	-3	-0.5	329.792	180	165
329	20	7.04	-6	-0.6	329.833	150	135
329	21	6.6	-3	-0.5	329.875	120	105
329	22	6.6	-4	-0.3	329.917	100	85
329	23	6.16	-5	-0.2	329.958	90	75
330	0	5.28	-4	-0.4	330	90	75
330	1	5.28	-7	-0.4	330.042	140	125
330	2	4.84	-10	-0.2	330.083	140	125
330	3	4.4	1	0.2	330.125	80	65
330	4	4.4	0	0.5	330.167	50	35
330	5	4.84	-2	0.2	330.208	90	75
330	6	4.84	-4	0.4	330.25	80	65
330	7	5.28	-5	0.6	330.292	110	95
330	8	4.84	-2	0.3	330.333	90	75
330	9	5.28	1	0.2	330.375	40	25
330	10	4.84	7	0.1	330.417	35	20
330	11	3.96	16	0.1	330.458	40	25
330	12	3.96	15	0.2	330.5	35	20
330	13	5.28	12	0.3	330.542	40	25
330	14	5.28	13	0.3	330.583	40	25
330	15	5.72	10	-0.1	330.625	70	55
330	16	6.16	6	-0.1	330.667	80	65
330	17	5.28	4	0	330.708	110	95
330	18	4.84	2	-0.1	330.75	130	115
330	19	4.84	0	0	330.792	150	135
330	20	3.96	0	0	330.833	170	155
330	21	4.4	2	-0.2	330.875	160	145
330	22	3.96	0	-0.1	330.917	170	155
330	23	3.52	5	-0.1	330.958	140	125
331	0	3.08	12	-0.2	331	170	155
331	1	3.52	13	-0.2	331.042	120	105
331	2	3.52	8	-0.1	331.083	80	65
331	3	3.52	13	-0.1	331.125	50	35
331	4	3.52	6	0	331.167	40	25
331	5	2.64	23	-0.3	331.208	50	35
331	6	2.64	35	-0.1	331.25	60	45
331	7	2.2	46	0.2	331.292	90	75
331	8	2.64	43	0.2	331.333	80	65
331	9	3.52	33	0	331.375	90	75
331	10	3.52	37	0	331.417	120	105
331	11	3.52	38	0.1	331.458	100	85
331	12	3.52	39	0.2	331.5	90	75
331	13	3.96	33	0.1	331.542	100	85
331	14	3.52	38	0	331.583	60	45
331	15	3.52	46	0.1	331.625	60	45
331	16	2.64	66	0.3	331.667	50	35
331	17	2.2	77	0.2	331.708	60	45
331	18	3.08	82	0.5	331.75	60	45
331	19	3.08	88	0.6	331.792	60	45
331	20	3.52	83	0.9	331.833	55	40
331	21	3.52	85	0.9	331.875	50	35
331	22	3.08	83	0.8	331.917	55	40
331	23	3.08	77	1	331.958	55	40
332	0	3.08	86	0.9	332	40	25
332	1	3.08	82	1	332.042	40	25
332	2	1.32	62	-0.4	332.083	70	55
332	3	2.2	72	0.3	332.125	70	55
332	4	1.32	49	0.1	332.167	70	55
332	5	1.76	74	0.5	332.208	50	35
332	6	2.2	86	0.5	332.25	80	65
332	7	2.64	85	0.7	332.292	75	60
332	8	3.08	79	0.6	332.333	50	35
332	9	2.2	75	0.6	332.375	80	65
332	10	1.76	90	0.9	332.417	80	65
332	11	2.2	115	2.1	332.458	30	15
332	12	3.52	91	2.2	332.5	40	25
332	13	3.08	93	1.7	332.542	50	35
332	14	2.64	100	1.3	332.583	60	45
332	15	2.64	93	1.4	332.625	50	35
332	16	2.2	99	1	332.667	60	45
332	17	1.76	103	0.6	332.708	50	35
332	18	2.64	111	0.9	332.75	60	45
332	19	3.08	115	1.7	332.792	30	15
332	20	3.08	120	1.9	332.833	35	20
332	21	3.08	125	0.6	332.875	40	25
332	22	2.2	121	0.8	332.917	45	30
332	23	3.08	131	1.1	332.958	40	25
333	0	3.08	133	0.5	333	50	35
333	1	2.64	118	0.5	333.042	50	35
333	2	3.08	118	0.4	333.083	55	40
333	3	3.52	128	0.4	333.125	50	35
333	4	2.64	123	0.3	333.167	40	25
333	5	2.64	122	0.6	333.208	45	30
333	6	3.08	126	0.8	333.25	50	35
333	7	3.08	116	1.1	333.292	35	20
333	8	2.64	115	1.3	333.333	50	35
333	9	2.2	109	1.3	333.375	50	35
333	10	3.08	109	1.4	333.417	35	20
333	11	3.08	104	1.7	333.458	35	20
333	12	3.08	102	1.6	333.5	40	25
333	13	3.08	96	1.5	333.542	50	35
333	14	3.08	96	1.3	333.583	60	45
333	15	2.64	99	0.9	333.625	55	40
333	16	3.08	105	0.9	333.667	55	40
333	17	3.52	99	0.7	333.708	60	45
333	18	3.08	95	0.8	333.75	50	35
333	19	2.64	101	0.6	333.792	45	30
333	20	3.08	114	0.6	333.833	40	25
333	21	3.08	108	0.9	333.875	35	20
333	22	3.08	119	0.8	333.917	35	20
333	23	2.64	114	0.6	333.958	35	20
334	0	3.08	111	0.7	334	40	25
334	1	3.08	111	0.6	334.042	40	25
334	2	2.64	112	0.3	334.083	40	25
334	3	3.08	114	0.6	334.125	40	25
334	4	2.64	109	0.7	334.167	40	25
334	5	3.08	114	1	334.208	40	25
334	6	3.52	114	1	334.25	40	25
334	7	3.08	104	0.9	334.292	35	20
334	8	3.08	100	0.9	334.333	70	55
334	9	3.52	102	1	334.375	60	45
334	10	3.52	99	1.1	334.417	50	35
334	11	3.52	91	1	334.458	40	25
334	12	3.08	95	1	334.5	45	30
334	13	3.08	92	1	334.542	55	40
334	14	2.64	85	0.7	334.583	50	35
334	15	2.64	87	0.6	334.625	45	30
334	16	3.08	88	0.7	334.667	45	30
334	17	3.08	94	0.3	334.708	50	35
334	18	3.52	91	0.5	334.75	50	35
334	19	3.52	90	0.4	334.792	60	45
334	20	3.52	87	0.4	334.833	60	45
334	21	3.96	89	0.3	334.875	50	35
334	22	3.52	84	0.6	334.917	50	35
334	23	3.52	80	0.6	334.958	50	35
335	0	4.64	75	0.5	335	50	35
335	1	4.64	79	0.4	335.042	55	40
335	2	5.15	83	0.2	335.083	60	45
335	3	5.15	83	0.3	335.125	60	45
335	4	5.15	76	0.2	335.167	55	40
335	5	4.12	80	0.5	335.208	55	40
335	6	4.64	82	0.6	335.25	60	45
335	7	5.15	79	0.7	335.292	55	40
335	8	5.15	86	0.8	335.333	65	50
335	9	5.15	82	0.8	335.375	60	45
335	10	4.64	82	0.9	335.417	60	45
335	11	5.15	85	1.1	335.458	50	35
335	12	4.64	87	1.2	335.5	45	30
335	13	4.12	80	1	335.542	40	25
335	14	3.61	85	0.9	335.583	40	25
335	15	3.61	89	0.9	335.625	50	35
335	16	4.12	81	0.8	335.667	40	25
335	17	4.12	86	0.6	335.708	50	35
335	18	4.12	96	0.7	335.75	60	45
335	19	4.12	93	0.7	335.792	55	40
335	20	4.12	76	0.5	335.833	45	30
335	21	4.12	91	0.5	335.875	45	30
335	22	3.61	89	0.8	335.917	45	30
335	23	3.09	83	0.7	335.958	40	25
336	0	3.09	87	0.7	336	50	35
336	1	3.09	76	0.6	336.042	35	20
336	2	3.09	78	0.2	336.083	35	20
336	3	3.61	75	0.8	336.125	35	20
336	4	3.61	79	0.8	336.167	40	25
336	5	3.61	72	1.1	336.208	40	25
336	6	3.09	63	0.9	336.25	60	45
336	7	3.09	52	1.2	336.292	50	35
336	8	2.06	49	1.4	336.333	50	35
336	9	2.06	59	1.6	336.375	50	35
336	10	2.58	37	0.6	336.417	50	35
336	11	3.09	28	0.3	336.458	55	40
336	12	3.61	23	0.1	336.5	50	35
336	13	4.12	19	0.2	336.542	50	35
336	14	4.64	14	0.3	336.583	40	25
336	15	4.64	11	0.3	336.625	45	30
336	16	4.64	9	0.2	336.667	50	35
336	17	4.64	3	0	336.708	60	45
336	18	4.12	0	0	336.75	65	50
336	19	3.61	-7	0.1	336.792	65	50
336	20	3.09	-9	0.1	336.833	50	35
336	21	3.09	-7	-0.2	336.875	50	35
336	22	3.61	-7	0.2	336.917	40	25
336	23	3.09	-6	0.3	336.958	40	25
337	0	3.61	-15	0.6	337	60	45
337	1	3.09	-39	0.8	337.042	70	55
337	2	2.58	-65	0.1	337.083	60	45
337	3	2.06	-66	0.6	337.125	50	35
337	4	3.09	-44	0.6	337.167	50	35
337	5	3.61	-40	0.9	337.208	60	45
337	6	4.12	-43	0.8	337.25	50	35
337	7	3.61	-48	0.9	337.292	45	30
337	8	3.09	-49	0.9	337.333	60	45
337	9	3.09	-44	0.9	337.375	50	35
337	10	3.09	-36	0.8	337.417	50	35
337	11	4.12	-32	1	337.458	70	55
337	12	3.61	-37	1.4	337.5	80	65
337	13	3.61	-52	0.9	337.542	80	65
337	14	4.12	-73	0.4	337.583	90	75
337	15	4.64	-89	0.3	337.625	65	50
337	16	4.12	-87	0.2	337.667	60	45
337	17	4.12	-82	0	337.708	50	35
337	18	4.12	-83	-0.1	337.75	70	55
337	19	4.12	-84	-0.2	337.792	80	65
337	20	3.61	-72	-0.1	337.833	90	75
337	21	4.12	-77	-0.1	337.875	80	65
337	22	4.12	-84	-0.1	337.917	75	60
337	23	3.61	-80	0.1	337.958	75	60
338	0	4.12	-76	0.3	338	85	70
338	1	3.09	-69	0.6	338.042	70	55
338	2	3.61	-73	0.1	338.083	70	55
338	3	3.09	-79	-0.1	338.125	35	20
338	4	2.58	-81	-0.1	338.167	40	25
338	5	2.58	-72	0.8	338.208	65	50
338	6	2.58	-69	0.8	338.25	50	35
338	7	3.09	-75	0.9	338.292	35	20
338	8	3.09	-78	0.7	338.333	35	20
338	9	2.06	-42	1.7	338.375	40	25
338	10	3.09	-23	2	338.417	50	35
338	11	3.09	-25	1.8	338.458	30	15
338	12	3.09	-18	1.9	338.5	30	15
338	13	4.12	-11	1.8	338.542	30	15
338	14	4.12	-7	1.7	338.583	25	10
338	15	4.12	-3	1.4	338.625	30	15
338	16	3.61	-3	1.3	338.667	40	25
338	17	4.12	-1	1.2	338.708	55	40
338	18	3.09	15	0.5	338.75	70	55
338	19	4.64	3	1.1	338.792	55	40
338	20	4.64	6	0.6	338.833	50	35
338	21	3.61	12	-0.1	338.875	40	25
338	22	3.09	16	0.4	338.917	30	15
338	23	4.12	28	0.9	338.958	30	15
339	0	4.12	27	0.3	339	40	25
339	1	3.61	32	0.1	339.042	40	25
339	2	3.09	39	-0.1	339.083	50	35
339	3	2.58	38	-0.1	339.125	50	35
339	4	2.58	27	-0.1	339.167	50	35
339	5	5.15	10	0.2	339.208	60	45
339	6	5.15	9	0.1	339.25	50	35
339	7	5.67	5	0.2	339.292	50	35
339	8	5.15	2	0.2	339.333	50	35
339	9	5.67	-2	0.1	339.375	40	25
339	10	6.18	-6	0.2	339.417	80	65
339	11	6.18	-9	0.3	339.458	80	65
339	12	5.67	-7	0.4	339.5	80	65
339	13	6.18	-2	0.4	339.542	80	65
339	14	7.21	0	0.2	339.583	80	65
339	15	7.21	5	-0.1	339.625	60	45
339	16	7.21	3	0	339.667	70	55
339	17	7.73	0	-0.1	339.708	90	75
339	18	7.21	-4	0	339.75	90	75
339	19	8.24	-7	-0.3	339.792	100	85
339	20	8.24	-11	-0.4	339.833	110	95
339	21	8.24	-10	-0.3	339.875	120	105
339	22	8.24	-12	-0.4	339.917	110	95
339	23	8.76	-12	-0.3	339.958	100	85
340	0	8.76	-12	-0.4	340	110	95
340	1	8.24	-11	-0.4	340.042	110	95
340	2	8.76	-11	-0.3	340.083	120	105
340	3	8.76	-11	-0.2	340.125	140	125
340	4	8.76	-12	-0.2	340.167	240	225
340	5	8.24	-12	-0.1	340.208	250	235
340	6	7.73	-9	0	340.25	220	205
340	7	7.73	-10	0	340.292	220	205
340	8	7.21	-11	0.2	340.333	170	155
340	9	6.7	-12	0.2	340.375	150	135
340	10	6.18	-11	0.3	340.417	150	135
340	11	5.67	-12	0.5	340.458	140	125
340	12	5.15	-11	0.7	340.5	110	95
340	13	5.15	-12	0.8	340.542	80	65
340	14	4.64	-14	0.9	340.583	70	55
340	15	4.64	-13	1.2	340.625	70	55
340	16	4.64	-14	1.3	340.667	50	35
340	17	4.12	-21	1.2	340.708	50	35
340	18	3.61	-16	1.3	340.75	50	35
340	19	4.12	-20	1.4	340.792	40	25
340	20	3.09	-16	0.7	340.833	70	55
340	21	3.61	-26	0.4	340.875	80	65
340	22	3.61	-17	1	340.917	80	65
340	23	4.12	-13	1.2	340.958	80	65
341	0	4.64	-8	1.6	341	80	65
341	1	5.15	-7	1.3	341.042	70	55
341	2	4.64	-15	1.6	341.083	60	45
341	3	4.12	-16	1.7	341.125	60	45
341	4	4.12	-10	1.9	341.167	30	15
341	5	4.12	-7	2.6	341.208	30	15
341	6	4.12	-7	2.6	341.25	35	20
341	7	5.67	2	1.6	341.292	35	20
341	8	4.64	2	2.1	341.333	35	20
341	9	5.15	7	2.1	341.375	35	20
341	10	3.61	30	1	341.417	35	20
341	11	6.18	14	0.6	341.458	50	35
341	12	6.18	16	0.3	341.5	75	60
341	13	6.7	7	0.2	341.542	75	60
341	14	6.18	29	0.5	341.583	60	45
341	15	6.18	40	0.7	341.625	75	60
341	16	6.18	40	0.4	341.667	75	60
341	17	6.18	38	0.3	341.708	110	95
341	18	6.18	33	0.2	341.75	120	105
341	19	5.67	34	0.2	341.792	100	85
341	20	5.67	24	-0.1	341.833	75	60
341	21	5.67	18	-0.1	341.875	70	55
341	22	5.15	18	0.1	341.917	75	60
341	23	5.67	5	-0.1	341.958	75	60
342	0	6.7	0	-0.2	342	80	65
342	1	6.18	2	0	342.042	130	115
342	2	7.21	-1	-0.3	342.083	140	125
342	3	6.7	4	-0.3	342.125	160	145
342	4	7.21	7	-0.2	342.167	170	155
342	5	6.7	6	-0.2	342.208	150	135
342	6	6.7	2	-0.1	342.25	180	165
342	7	7.21	-6	0	342.292	180	165
342	8	8.76	-10	0.1	342.333	200	185
342	9	8.76	-7	0.1	342.375	180	165
342	10	8.76	-8	0.1	342.417	180	165
342	11	9.27	-7	0	342.458	180	165
342	12	9.27	-4	0	342.5	185	170
342	13	10.3	-6	0	342.542	170	155
342	14	10.3	-4	0	342.583	150	135
342	15	10.82	-3	-0.1	342.625	160	145
342	16	10.3	3	-0.2	342.667	170	155
342	17	10.3	5	-0.4	342.708	180	165
342	18	9.79	5	-0.3	342.75	150	135
342	19	9.79	10	-0.3	342.792	160	145
342	20	8.76	10	-0.3	342.833	170	155
342	21	9.27	11	-0.4	342.875	130	115
342	22	9.27	14	-0.4	342.917	110	95
342	23	7.73	17	-0.3	342.958	85	70
343	0	8.24	16	-0.4	343	120	105
343	1	8.76	22	-0.3	343.042	110	95
343	2	8.76	24	-0.2	343.083	120	105
343	3	7.73	34	-0.2	343.125	125	110
343	4	8.24	36	0	343.167	120	105
343	5	8.76	35	0	343.208	120	105
343	6	8.76	35	-0.1	343.25	130	115
343	7	8.76	38	0	343.292	120	105
343	8	8.24	44	0	343.333	130	115
343	9	8.24	41	0.1	343.375	130	115
343	10	9.27	36	0.2	343.417	140	125
343	11	8.76	37	0.3	343.458	130	115
343	12	8.76	39	0.4	343.5	150	135
343	13	9.27	35	0.4	343.542	190	175
343	14	9.27	32	0.2	343.583	240	225
343	15	8.76	23	0	343.625	260	245
343	16	9.79	0	-0.2	343.667	300	285
343	17	9.27	-3	-0.3	343.708	300	285
343	18	9.27	-11	-0.3	343.75	300	285
343	19	11.33	-25	-0.2	343.792	300	285
343	20	9.79	-26	-0.2	343.833	300	285
343	21	8.76	-31	-0.3	343.875	300	285
343	22	8.76	-35	-0.2	343.917	300	285
343	23	9.79	-41	-0.4	343.958	190	175
344	0	8.76	-46	-0.3	344	110	95
344	1	7.73	-55	-0.5	344.042	110	95
344	2	7.21	-51	-0.3	344.083	100	85
344	3	7.21	-49	-0.2	344.125	110	95
344	4	7.73	-48	-0.2	344.167	100	85
344	5	6.7	-38	-0.1	344.208	80	65
344	6	7.21	-31	0.1	344.25	70	55
344	7	7.21	-29	0.2	344.292	100	85
344	8	6.18	-20	-0.1	344.333	130	115
344	9	6.18	-2	-0.1	344.375	150	135
344	10	6.18	21	0.1	344.417	130	115
344	11	7.73	11	-0.1	344.458	120	105
344	12	9.27	-5	0.2	344.5	230	215
344	13	9.27	3	0.2	344.542	200	185
344	14	11.33	-3	0	344.583	220	205
344	15	13.91	-3	-0.1	344.625	280	265
344	16	12.88	2	-0.2	344.667	300	285
344	17	12.36	9	-0.3	344.708	250	235
344	18	11.33	5	-0.4	344.75	240	225
344	19	9.79	1	-0.4	344.792	280	265
344	20	11.33	-3	-0.3	344.833	280	265
344	21	11.85	-7	-0.4	344.875	220	205
344	22	10.3	-8	-0.4	344.917	230	215
344	23	11.33	-12	-0.4	344.958	270	255
345	0	10.82	-18	-0.3	345	240	225
345	1	10.82	-15	-0.4	345.042	230	215
345	2	9.79	-10	-0.3	345.083	250	235
345	3	9.27	-8	-0.3	345.125	260	245
345	4	9.27	-8	0	345.167	190	175
345	5	9.79	-4	0.1	345.208	200	185
345	6	9.79	-10	0.1	345.25	220	205
345	7	9.27	-7	-0.1	345.292	200	185
345	8	9.27	-5	-0.1	345.333	200	185
345	9	9.79	-9	0	345.375	240	225
345	10	8.76	-14	0.2	345.417	180	165
345	11	7.73	-15	0.1	345.458	120	105
345	12	7.73	-20	0.2	345.5	100	85
345	13	7.21	-19	0.1	345.542	80	65
345	14	7.21	-21	0.2	345.583	60	45
345	15	7.21	-21	0.1	345.625	40	25
345	16	6.7	-21	0.2	345.667	50	35
345	17	5.67	-17	0.3	345.708	70	55
345	18	5.67	-20	0.3	345.75	100	85
345	19	6.18	-43	0.2	345.792	80	65
345	20	6.7	-53	0.2	345.833	70	55
345	21	7.21	-66	0.1	345.875	50	35
345	22	5.67	-76	0.3	345.917	60	45
345	23	4.64	-62	0	345.958	70	55
346	0	4.64	-64	0.1	346	80	65
346	1	4.12	-67	0	346.042	80	65
346	2	4.64	-75	-0.1	346.083	80	65
346	3	4.64	-75	0	346.125	50	35
346	4	5.67	-69	-0.1	346.167	60	45
346	5	5.15	-63	-0.1	346.208	60	45
346	6	4.12	-70	0	346.25	40	25
346	7	2.58	-67	0.1	346.292	40	25
346	8	1.55	-67	0.8	346.333	35	20
346	9	1.03	-59	1.1	346.375	40	25
346	10	2.06	-40	0.5	346.417	120	105
346	11	2.06	-16	0.1	346.458	120	105
346	12	2.58	-13	0.1	346.5	120	105
346	13	3.61	-6	0.4	346.542	100	85
346	14	4.64	-16	0.8	346.583	50	35
346	15	5.67	-16	0.6	346.625	60	45
346	16	5.67	-16	0.3	346.667	60	45
346	17	5.67	-14	0.3	346.708	70	55
346	18	4.64	-27	0.4	346.75	150	135
346	19	3.09	-38	0.4	346.792	200	185
346	20	4.12	8	0.1	346.833	220	205
346	21	6.18	-7	0.1	346.875	180	165
346	22	6.7	-5	0.3	346.917	170	155
346	23	6.18	2	0.3	346.958	150	135
348	0	1.03	-61	1.2	348	70	55
348	1	0.52	-79	0.6	348.042	70	55
348	2	0	-63	2	348.083	40	25
348	9	1.03	63	3.2	348.375	70	55
348	10	1.55	68	2.4	348.417	80	65
348	11	1.55	73	1.4	348.458	80	65
348	12	2.06	77	2.7	348.5	50	35
348	13	2.06	81	3	348.542	35	20
348	14	2.06	93	1.3	348.583	35	20
348	15	2.58	96	1.6	348.625	40	25
348	16	2.58	97	2.7	348.667	40	25
348	17	2.58	98	1.9	348.708	40	25
348	18	1.55	97	0.3	348.75	60	45
348	19	2.58	99	1.1	348.792	40	25
348	20	3.09	91	1.6	348.833	35	20
348	21	2.58	100	0.4	348.875	40	25
348	22	2.58	103	1	348.917	35	20
348	23	3.09	109	0.7	348.958	35	20
349	0	3.61	117	0.6	349	30	15
349	1	4.12	117	1	349.042	30	15
349	2	4.12	124	1.1	349.083	30	15
349	3	5.67	115	1.4	349.125	35	20
349	4	5.15	101	1.2	349.167	30	15
349	5	4.64	95	1	349.208	30	15
349	6	4.12	98	1.2	349.25	30	15
349	7	3.61	103	1.2	349.292	35	20
349	8	4.64	103	1.3	349.333	30	15
349	9	4.12	113	1.3	349.375	40	25
349	10	4.64	120	1.5	349.417	40	25
349	11	5.15	117	1.2	349.458	40	25
349	12	5.15	111	1.2	349.5	45	30
349	13	5.15	114	1.2	349.542	45	30
349	14	6.18	114	1.4	349.583	45	30
349	15	6.18	117	1.3	349.625	45	30
349	16	5.67	120	1.1	349.667	45	30
349	17	5.15	115	1	349.708	50	35
349	18	5.15	114	0.9	349.75	50	35
349	19	4.64	112	0.8	349.792	50	35
349	20	5.15	106	0.5	349.833	50	35
349	21	4.64	120	0.5	349.875	60	45
349	22	4.64	119	0.8	349.917	80	65
349	23	3.61	123	0.8	349.958	50	35
350	0	3.61	132	0.4	350	35	20
350	1	4.64	145	0.3	350.042	45	30
350	2	4.12	139	0.5	350.083	50	35
350	3	3.61	140	0.4	350.125	55	40
350	4	3.61	136	0.5	350.167	60	45
350	5	3.09	147	0.4	350.208	70	55
350	6	3.09	160	1.1	350.25	55	40
350	7	3.61	162	0.9	350.292	55	40
350	8	3.61	164	1.2	350.333	55	40
350	9	3.61	167	0.9	350.375	60	45
350	10	3.61	161	0.8	350.417	40	25
350	11	4.64	151	0.4	350.458	30	15
350	12	4.12	150	0.3	350.5	30	15
350	13	4.64	138	0.9	350.542	35	20
350	14	4.12	139	0.7	350.583	35	20
350	15	4.12	141	0.6	350.625	35	20
350	16	5.15	149	0.5	350.667	40	25
350	17	4.64	139	0.5	350.708	40	25
350	18	4.12	133	0.4	350.75	50	35
350	19	3.09	142	-0.1	350.792	80	65
350	20	4.12	133	0.3	350.833	50	35
350	21	6.18	132	0.8	350.875	70	55
350	22	6.18	139	0.8	350.917	90	75
350	23	6.7	145	0.4	350.958	60	45
351	0	6.7	139	0.7	351	70	55
351	1	6.7	135	0.7	351.042	100	85
351	2	6.18	132	0.3	351.083	120	105
351	3	6.7	128	0	351.125	100	85
351	4	6.18	123	0	351.167	100	85
351	5	6.7	125	0.2	351.208	100	85
351	6	7.73	131	0.4	351.25	100	85
351	7	8.24	136	0.5	351.292	110	95
351	8	8.76	135	0.6	351.333	120	105
351	9	9.27	135	0.7	351.375	160	145
351	10	10.3	132	0.7	351.417	180	165
351	11	9.79	128	0.6	351.458	190	175
351	12	9.27	125	0.5	351.5	190	175
351	13	10.3	123	0.4	351.542	190	175
351	14	9.27	119	0.4	351.583	210	195
351	15	8.76	111	0.4	351.625	250	235
351	16	9.27	112	0.3	351.667	240	225
351	17	9.79	111	0.1	351.708	250	235
351	18	10.82	111	0	351.75	260	245
351	19	10.3	108	0	351.792	270	255
351	20	9.79	107	-0.1	351.833	250	235
351	21	9.79	101	-0.1	351.875	250	235
351	22	9.27	101	-0.1	351.917	250	235
351	23	10.3	95	-0.1	351.958	240	225
352	0	9.79	93	-0.2	352	240	225
352	1	9.79	91	-0.2	352.042	240	225
352	2	9.27	88	-0.2	352.083	220	205
352	3	10.3	89	-0.1	352.125	210	195
352	4	10.82	90	0	352.167	220	205
352	5	10.82	88	0.1	352.208	200	185
352	6	12.36	83	0.2	352.25	150	135
352	7	11.85	73	0.1	352.292	150	135
352	8	11.33	63	0.1	352.333	150	135
352	9	9.79	63	0.2	352.375	150	135
352	10	9.79	55	0.3	352.417	160	145
352	11	9.79	48	0.2	352.458	160	145
352	12	9.27	47	0.2	352.5	150	135
352	13	9.27	52	0.1	352.542	150	135
353	14	4.64	24	-0.2	353.583	70	55
353	15	4.64	26	-0.1	353.625	80	65
353	16	4.12	22	-0.1	353.667	80	65
353	17	4.12	21	-0.1	353.708	80	65
353	18	4.12	5	0	353.75	70	55
353	19	3.09	12	0.1	353.792	80	65
353	20	3.09	9	0	353.833	80	65
353	21	2.58	21	0	353.875	70	55
353	22	3.09	-3	-0.3	353.917	70	55
353	23	2.58	8	-0.2	353.958	70	55
354	0	2.06	-5	0	354	60	45
354	1	2.58	-11	0.1	354.042	60	45
354	2	2.06	-12	0.3	354.083	60	45
354	3	3.09	18	0.2	354.125	60	45
354	4	2.06	15	0.4	354.167	40	25
354	5	0.52	0	0.7	354.208	60	45
354	9	1.55	158	1.2	354.375	60	45
354	10	4.12	22	0.6	354.417	60	45
354	11	4.12	34	0.7	354.458	60	45
354	12	5.67	43	0.8	354.5	60	45
354	13	3.09	55	0.9	354.542	50	35
354	14	5.15	-17	0.8	354.583	60	45
354	15	5.67	-22	0.5	354.625	70	55
354	16	4.12	-57	0.4	354.667	70	55
354	17	2.58	-50	0.5	354.708	80	65
354	18	3.61	-4	0.4	354.75	80	65
354	19	3.61	-4	0.3	354.792	80	65
354	20	4.12	9	0.3	354.833	70	55
354	21	2.58	18	0.4	354.875	60	45
354	22	3.61	45	0.5	354.917	60	45
354	23	4.12	48	0.7	354.958	60	45
355	0	3.09	59	0.9	355	70	55
355	1	3.09	77	0	355.042	70	55
355	2	3.61	82	-0.2	355.083	40	25
355	3	3.61	80	-0.1	355.125	35	20
355	4	4.12	78	0	355.167	50	35
355	5	3.61	87	0.4	355.208	45	30
355	6	4.12	89	0.5	355.25	45	30
355	7	4.64	80	0.6	355.292	55	40
355	8	4.64	81	0.8	355.333	50	35
355	9	4.64	80	0.9	355.375	50	35
355	10	4.64	81	0.9	355.417	50	35
355	11	4.12	75	0.9	355.458	50	35
355	12	4.64	79	1.1	355.5	60	45
355	13	4.12	93	1	355.542	40	25
355	14	4.12	91	1	355.583	35	20
355	15	3.61	92	0.7	355.625	40	25
355	16	3.61	94	0.4	355.667	40	25
355	17	3.09	94	0	355.708	40	25
355	18	3.61	99	0.2	355.75	40	25
355	19	4.12	103	0.2	355.792	35	20
355	20	3.61	92	0.1	355.833	40	25
355	21	4.12	91	0.1	355.875	40	25
355	22	4.12	94	0.5	355.917	60	45
355	23	4.64	93	0.5	355.958	70	55
356	0	4.64	94	0.4	356	50	35
356	1	4.64	90	0.2	356.042	60	45
356	2	4.64	85	0.2	356.083	60	45
358	0	1.55	29	-0.3	358	40	25
358	1	2.58	-6	0.2	358.042	30	15
358	2	2.06	-13	0.5	358.083	40	25
358	3	2.58	-12	1.1	358.125	40	25
358	4	2.06	-45	1.3	358.167	70	55
358	5	1.03	-141	0.9	358.208	80	65
358	6	1.55	205	1	358.25	80	65
358	7	2.58	-119	1	358.292	45	30
358	8	2.58	-99	0.4	358.333	50	35
358	9	2.58	-90	0.1	358.375	35	20
358	10	2.06	-67	0.9	358.417	40	25
358	11	2.58	-60	0.7	358.458	40	25
358	12	2.58	-53	0.8	358.5	90	75
358	13	2.06	-79	0.7	358.542	35	20
358	14	1.03	-90	-0.5	358.583	35	20
358	15	0.52	-80	1.1	358.625	35	20
358	16	0	-79	1.5	358.667	30	15
358	18	1.55	-4	1.1	358.75	30	15
358	19	1.03	-2	0.5	358.792	30	15
358	20	0.52	0	1.2	358.833	30	15
358	21	0.52	69	2.8	358.875	30	15
358	22	2.58	62	2.5	358.917	30	15
358	23	3.61	69	2.5	358.958	30	15
359	0	3.09	67	2.3	359	25	10
359	1	3.09	72	2	359.042	25	10
359	2	3.09	81	1.1	359.083	25	10
359	3	3.09	83	1.2	359.125	25	10
359	4	4.12	86	1	359.167	40	25
359	5	4.12	90	1.1	359.208	45	30
359	6	4.64	86	1.2	359.25	40	25
359	7	4.64	82	1.3	359.292	50	35
359	8	3.61	71	1.3	359.333	60	45
359	9	3.61	56	1	359.375	70	55
359	10	4.64	27	1	359.417	50	35
359	11	4.12	32	0.8	359.458	90	75
359	12	4.64	66	1	359.5	150	135
359	13	5.15	45	1	359.542	100	85
359	14	5.67	40	1.1	359.583	100	85
359	15	6.18	36	0.9	359.625	100	85
359	16	4.64	56	1.3	359.667	70	55
359	17	5.15	56	0.9	359.708	70	55
359	18	4.64	52	1.4	359.75	100	85
359	19	4.12	54	1.6	359.792	100	85
359	20	5.15	60	0.9	359.833	120	105
359	21	7.73	15	0.4	359.875	90	75
362	15	6.18	185	0	362.625	70	55
362	16	1.55	201	0.1	362.667	50	35
362	17	5.15	0	0	362.708	50	35
362	18	5.67	10	0.2	362.75	50	35
362	19	5.15	9	0.3	362.792	40	25
362	20	4.64	-1	0.3	362.833	40	25
362	21	5.15	6	0.2	362.875	100	85
362	22	5.67	-8	0.2	362.917	70	55
362	23	5.15	-8	0.2	362.958	70	55
363	0	5.15	3	0.2	363	60	45
363	1	4.64	7	0	363.042	70	55
363	2	5.15	8	0.1	363.083	80	65
363	3	6.18	1	0.3	363.125	80	65
363	4	5.67	9	0.3	363.167	50	35
363	5	5.15	14	0.2	363.208	70	55
363	6	6.7	13	0.3	363.25	90	75
363	7	6.7	14	0.4	363.292	80	65
363	8	6.7	16	0.4	363.333	75	60
363	9	6.18	17	0.3	363.375	70	55
363	10	6.18	14	0.4	363.417	70	55
363	11	6.18	17	0.5	363.458	60	45
363	12	5.67	17	0.4	363.5	60	45
363	13	5.15	16	0.3	363.542	40	25
363	14	4.64	12	0.2	363.583	50	35
363	15	5.15	27	0.3	363.625	40	25
363	16	5.15	29	0.2	363.667	40	25
363	17	4.64	36	0.3	363.708	50	35
363	18	4.64	41	0.5	363.75	60	45
