# Supplementary material for: The meteorology and chemistry of high nitrogen oxide concentrations in the stable boundary layer at the South Pole
Source: Copernicus journal article supplement (doi:10.5194/acp-18-3755-2018), 2018-03-14
Supplement: Supplementary file 11 [file SODAR_2003.xls]

## Sheet: Sheet1
JD	HR	MN	JDF	Sodar BLD	NO		Note Sodar Boundary Layer Depth (BLD, m) derived using method in Neff et al. 2008
326	6	0	326.25	30.2	360.5
326	6	30	326.271	27.8	340.5
326	7	0	326.292	30.2	341
326	7	30	326.313	33.1	373
326	8	0	326.333	30.2	286
326	8	30	326.354	32	245
326	9	0	326.375	29.5	249
326	9	30	326.396	27.1	251
326	10	0	326.417	33.1	263.5
326	10	30	326.438	24.6	245
326	11	0	326.458	34.8	250.5
326	11	30	326.479	26.4	263
326	12	0	326.5	26.4	256.5
326	12	30	326.521	28.1	275
326	13	0	326.542	26	335.5
326	13	30	326.563	24.3	298.5
326	14	0	326.583	28.5	268
326	14	30	326.604	25	265
326	15	0	326.625	27.8	279.5
326	15	30	326.646	22.9	280
326	16	0	326.667	29.2	252
326	16	30	326.688	29.5	254.5
326	17	0	326.708	29.9	252.5
326	17	30	326.729	30.2	252
326	18	0	326.75	35.5	256
326	18	30	326.771	28.8	261
326	19	0	326.792	28.8	258
326	19	30	326.813	24.6	252.5
326	20	0	326.833	22.5	245
326	20	30	326.854	21.1	271.5
326	21	0	326.875	23.9	285
326	21	30	326.896	21.1	261
326	22	30	326.938	22.5	255
326	23	0	326.958	23.2	275.5
326	23	30	326.979	20	296.5
327	0	0	327	23.9	329.5
327	0	30	327.021	23.9	327.5
327	1	0	327.042	29.9	325
327	1	30	327.063	35.2	351.5
327	2	0	327.083	26	371
327	2	30	327.104	32	482.5
327	3	0	327.125	39.4	469
327	3	30	327.146	26.4	615
327	4	0	327.167	23.6	525.5
327	4	30	327.188	22.5	400.5
327	5	0	327.208	22.5	406.5
327	5	30	327.229	22.5	406
327	6	0	327.25	21.8	365.5
327	6	30	327.271	19.7	349
327	7	0	327.292	19	323.5
327	7	30	327.313	22.5	338
327	8	0	327.333	21.4	320.5
327	8	30	327.354	23.6	315.5
327	9	0	327.375	22.9	308.5
327	9	30	327.396	59.8	311.5
327	10	0	327.417	21.8	299
327	10	30	327.438	20.7	328
327	11	0	327.458	19.7	319.5
327	11	30	327.479	26.4	338.5
327	12	0	327.5	20	347
327	12	30	327.521	20.7	357.5
327	13	0	327.542	22.2	356.5
327	13	30	327.563	23.6	347
327	14	0	327.583	40.4	353
327	14	30	327.604	23.9	384.5
327	15	0	327.625	21.8	355.5
327	15	30	327.646	29.5	354
327	16	0	327.667	32.3	417.5
327	16	30	327.688	23.9	532.5
327	17	0	327.708	27.8	459
327	17	30	327.729	21.8	626.5
327	18	0	327.75	22.9	776
327	18	30	327.771	22.5	753.5
327	19	0	327.792	19	734
327	19	30	327.813	23.2	696
327	20	0	327.833	23.6	708
327	20	30	327.854	21.4	790
327	21	0	327.875	19	885
327	21	30	327.896	27.1	870.5
327	22	0	327.917	28.8	828.5
327	22	30	327.938	34.5	888.5
327	23	0	327.958	26.7	803
327	23	30	327.979	25.3	373.5
328	0	0	328	26.4	715
328	0	30	328.021	27.1	831.5
328	1	0	328.042	26.4	853
328	1	30	328.063	39.4	860
328	2	0	328.083	28.8	831.5
328	2	30	328.104	51.7	797
328	3	0	328.125	36.9	752
328	3	30	328.146	39.4	775
328	4	0	328.167	35.2	784
328	4	30	328.188	35.2	861.5
328	5	0	328.208	38	890
328	5	30	328.229	45	907
328	6	0	328.25	41.1	873.5
328	6	30	328.271	30.6	869
328	7	0	328.292	38.7	810.5
328	7	30	328.313	38	805.5
328	8	0	328.333	35.2	873.5
328	8	30	328.354	36.9	879.5
328	9	0	328.375	32.3	843.5
328	9	30	328.396	41.5	838
328	10	0	328.417	39.4	816
328	10	30	328.438	29.5	806.5
328	11	0	328.458	29.2	788.5
328	11	30	328.479	27.1	809
328	12	0	328.5	40.8	758
328	12	30	328.521	40.1	774.5
328	13	0	328.542	22.5	783
328	13	30	328.563	47.1	753.5
328	14	0	328.583	45	739
328	14	30	328.604	49.6	750.5
328	15	0	328.625	55.6	734
328	15	30	328.646	52	736
328	16	0	328.667	41.1	775
328	16	30	328.688	22.5	858
328	17	0	328.708	56.6	843
328	17	30	328.729	25.3	867.5
328	18	0	328.75	39.7	901.5
328	18	30	328.771	34.1	894.5
328	19	0	328.792	21.8	887.5
328	19	30	328.813	32	892
328	20	0	328.833	22.9	896
328	20	30	328.854	51.7	885.5
328	21	0	328.875	34.8	887
328	21	30	328.896	33.4	903
328	22	0	328.917	33.4	870.5
328	22	30	328.938	30.9	874
328	23	0	328.958	33.4	851.5
328	23	30	328.979	31.3	834.5
329	0	0	329	29.5	829
329	0	30	329.021	30.2	829
329	1	0	329.042	43.6	815
329	1	30	329.063	44.3	791
329	2	0	329.083	44.7	784
329	2	30	329.104	47.8	812
329	3	0	329.125	49.9	760.5
329	3	30	329.146	51	749
329	4	0	329.167	43.2	749.5
329	4	30	329.188	42.5	769.5
329	5	0	329.208	38	762.5
329	5	30	329.229	37.6	764.5
329	6	0	329.25	26	795
329	6	30	329.271	26.7	801
329	7	0	329.292	74.9	799.5
329	7	30	329.313	72.1	848
329	8	0	329.333	21.4	840.5
329	8	30	329.354	56.3	849.5
329	9	0	329.375	39.4	886
329	9	30	329.396	57.7	911.5
329	10	0	329.417	35.2	930.5
329	10	30	329.438	37.3	970
329	11	0	329.458	40.1	981
329	11	30	329.479	39.7	890.5
329	12	0	329.5	32.3	859.5
329	12	30	329.521	34.5	785
329	13	0	329.542	33.1	738.5
329	13	30	329.563	52	689.5
329	14	0	329.583	48.9	676
329	14	30	329.604	44.7	657
329	15	0	329.625	46.8	637
329	15	30	329.646	41.8	616
329	16	0	329.667	27.8	610
329	16	30	329.688	28.8	623.5
329	17	0	329.708	27.4	608
329	17	30	329.729	34.1	651
329	18	0	329.75	34.5	634.5
329	18	30	329.771	32.3	647
329	19	0	329.792	31.3	633.5
329	23	0	329.958	31.3	416.5
329	23	30	329.979	35.2	540.5
330	0	0	330	38.3	521.5
330	0	30	330.021	33.4	518
330	1	0	330.042	38	482.5
330	1	30	330.063	43.2	427
330	2	0	330.083	39.7	370.5
330	2	30	330.104	42.9	384
330	3	0	330.125	39	354.5
330	3	30	330.146	52.4	371
330	4	0	330.167	58.4	377.5
330	4	30	330.188	55.2	342
330	5	0	330.208	36.2	442.5
330	5	30	330.229	41.5	424
330	8	0	330.333	34.5	410.5
330	8	30	330.354	39	439
330	9	0	330.375	42.5	455
330	9	30	330.396	37.6	498.5
330	10	0	330.417	36.6	527
330	10	30	330.438	30.2	542.5
330	11	0	330.458	20	543
330	11	30	330.479	32.3	521
330	12	0	330.5	33.1	479.5
330	12	30	330.521	44.7	446.5
330	13	0	330.542	48.2	405.5
330	13	30	330.563	52.4	388
330	14	0	330.583	37.6	397
330	14	30	330.604	48.2	422.5
330	15	0	330.625	43.6	405
330	15	30	330.646	73.5	415.5
330	16	0	330.667	46.1	377
330	16	30	330.688	66.8	346
330	17	0	330.708	52	328.5
330	17	30	330.729	55.9	308
330	18	0	330.75	49.2	300.5
330	18	30	330.771	42.9	295
330	19	0	330.792	39	296
330	19	30	330.813	35.9	315
330	20	0	330.833	35.9	287.5
330	20	30	330.854	35.9	279.5
330	21	0	330.875	35.9	271.5
330	21	30	330.896	39.4	262.5
330	22	0	330.917	46.4	258
330	22	30	330.938	52.7	255
330	23	0	330.958	59.8	248.5
330	23	30	330.979	65.4	236
331	0	0	331	77	239
331	22	0	331.917	45.7	287
331	22	30	331.938	47.5	297
331	23	0	331.958	25.7	289.5
331	23	30	331.979	30.2	283
332	0	0	332	29.5	286
332	0	30	332.021	28.1	286
332	1	0	332.042	33.4	314.5
332	1	30	332.063	38.7	340.5
332	2	0	332.083	33.1	338
332	2	30	332.104	32	337.5
332	3	0	332.125	55.6	334.5
332	3	30	332.146	44.7	341.5
332	4	0	332.167	52.7	345.5
332	4	30	332.188	56.6	405
332	5	0	332.208	58	518.5
332	5	30	332.229	45.7	516.5
332	6	0	332.25	23.2	493
332	6	30	332.271	28.8	502.5
332	7	0	332.292	29.5	477
332	7	30	332.313	33.8	459.5
332	8	0	332.333	54.8	456.5
332	8	30	332.354	26.4	496
332	9	0	332.375	34.1	484.5
332	9	30	332.396	28.5	499.5
332	10	0	332.417	44.7	502.5
332	10	30	332.438	45.4	510.5
332	11	0	332.458	35.2	527.5
332	11	30	332.479	52	627.5
332	12	0	332.5	36.2	608
332	12	30	332.521	22.5	598
332	13	0	332.542	23.9	575.5
332	13	30	332.563	25	564
332	14	0	332.583	27.4	547.5
332	14	30	332.604	25.7	569
332	15	0	332.625	47.1	627
332	15	30	332.646	56.3	617
332	16	0	332.667	25	634
332	16	30	332.688	29.5	601.5
332	17	0	332.708	42.9	541.5
332	17	30	332.729	36.2	527
332	18	0	332.75	36.9	548
332	18	30	332.771	32.7	569
332	19	0	332.792	44	613
332	19	30	332.813	49.9	661
332	20	0	332.833	54.8	686
332	20	30	332.854	41.5	661
332	21	0	332.875	48.9	648
332	21	30	332.896	51.7	670
332	22	0	332.917	46.1	627.5
335	1	0	335.042	108.3	661
335	1	30	335.063	125.1	656
335	2	0	335.083	135.7	794
335	2	30	335.104	130	745
335	3	0	335.125	103	715.5
335	3	30	335.146	105.1	703
335	4	0	335.167	135.4	666
335	4	30	335.188	141.5	592.5
335	5	0	335.208	138.6	587
335	5	30	335.229	93.7	618
335	6	0	335.25	96.9	577.5
335	6	30	335.271	91.2	471.5
335	7	0	335.292	130	438
335	7	30	335.313	130	464.5
335	8	0	335.333	83.4	529.5
335	8	30	335.354	137.2	548
335	9	0	335.375	150.8	545.5
335	9	30	335.396	94.9	556
335	10	0	335.417	100.9	538.5
335	10	30	335.438	167	522.5
335	11	0	335.458	123.7	519.5
335	11	30	335.479	105.5	487
335	12	0	335.5	121	446
335	12	30	335.521	123.1	433.5
335	13	0	335.542	157.2	426.5
335	13	30	335.563	160.7	418.5
335	14	0	335.583	127.2	416.5
335	15	0	335.625	135.4	390.5
335	15	30	335.646	148.4	385
335	16	0	335.667	123.1	381.5
335	16	30	335.688	130.8	383.5
335	17	0	335.708	90	390.5
335	17	30	335.729	79.1	384.5
335	18	0	335.75	78.1	396.5
335	18	30	335.771	83	407.5
335	19	0	335.792	87.3	423.5
335	19	30	335.813	96.9	451
335	20	0	335.833	90	416.5
335	20	30	335.854	70	421.5
335	21	0	335.875	85	415
335	21	30	335.896	80	419
335	22	0	335.917	68.6	402.5
335	22	30	335.938	62.6	391
335	23	0	335.958	62.6	408.5
335	23	30	335.979	50.3	412.5
336	0	0	336	84	414.5
336	0	30	336.021	90.7	437
336	1	0	336.042	124.5	411
336	1	30	336.063	122	417
336	2	0	336.083	129.7	436
336	2	30	336.104	169.5	450
336	3	0	336.125	167.4	461
336	3	30	336.146	140.6	459.5
336	4	0	336.167	130.1	445.5
336	4	30	336.188	133.3	446
336	5	0	336.208	124.1	441
336	6	0	336.25	95.6	403
336	6	30	336.271	92.1	398
336	7	0	336.292	82.3	394.5
336	7	30	336.313	83.4	374.5
336	8	0	336.333	121.3	365
336	8	30	336.354	107.9	364.5
336	9	0	336.375	109.3	366
336	9	30	336.396	115	365
336	10	0	336.417	110.1	351.5
336	10	30	336.438	102.3	355
336	11	0	336.458	102.3	322.5
336	11	30	336.479	105.8	296
336	12	0	336.5	115.7	293
336	12	30	336.521	125.2	289.5
336	13	0	336.542	117.4	276.5
336	13	30	336.563	107.9	274.5
336	14	0	336.583	145.2	265.5
336	14	30	336.604	135.7	245
336	15	0	336.625	137.5	254.5
336	15	30	336.646	168.8	246
336	16	0	336.667	135.4	231.5
336	16	30	336.688	167.4	252
336	17	0	336.708	107.6	250
336	17	30	336.729	100.5	251.5
336	18	0	336.75	85.5	251
336	18	30	336.771	83.7	235.5
336	19	0	336.792	84.1	221
336	19	30	336.813	93.7	223.5
336	20	0	336.833	97	232
336	20	30	336.854	102.3	266
336	21	0	336.875	89.1	228.5
336	21	30	336.896	99.8	231.5
336	22	0	336.917	94.8	232.5
336	22	30	336.938	82.7	233
336	23	0	336.958	103.4	230.5
336	23	30	336.979	126.2	216.5
337	0	0	337	165.3	185
337	0	30	337.021	112.6	186
337	1	0	337.042	160.7	184
337	2	0	337.083	136.5	189.5
337	2	30	337.104	104.8	197.5
337	3	0	337.125	161	208.5
337	3	30	337.146	152.9	219
337	4	0	337.167	142.4	227.5
337	4	30	337.188	137.1	256
337	5	0	337.208	115.3	268.5
337	5	30	337.229	109.7	261.5
337	6	0	337.25	111.5	265.5
337	6	30	337.271	110.8	297
337	7	0	337.292	125.2	288
337	7	30	337.313	125.5	314.5
337	8	0	337.333	128.3	310
337	8	30	337.354	100.5	323.5
337	9	0	337.375	101.6	321.5
337	9	30	337.396	91.4	314.5
337	10	0	337.417	86.8	310
337	10	30	337.438	91.6	325.5
337	11	0	337.458	80.9	324.5
337	11	30	337.479	83	348
337	12	0	337.5	89.8	327.5
337	12	30	337.521	87.9	318
337	13	0	337.542	88.7	309
337	13	30	337.563	86.2	310.5
337	14	0	337.583	92	305.5
337	14	30	337.604	101.6	295
337	15	0	337.625	101.6	287.5
337	15	30	337.646	104.8	273.5
337	16	0	337.667	116.7	273
337	16	30	337.688	119.5	317.5
337	17	0	337.708	93.2	288.5
337	17	30	337.729	114.8	295
337	18	0	337.75	104.1	288.5
337	18	30	337.771	78.8	290
337	19	0	337.792	60.5	286.5
337	19	30	337.813	92.5	290.5
337	20	0	337.833	53.8	290.5
337	20	30	337.854	91.1	283
337	21	0	337.875	95.3	298.5
337	21	30	337.896	97.7	346
337	22	0	337.917	131.8	366.5
337	22	30	337.938	111.9	338.5
337	23	0	337.958	131.8	330.5
337	23	30	337.979	129.7	318.5
338	0	0	338	115.7	312
338	0	30	338.021	126.2	326
338	1	0	338.042	148.4	337
338	1	30	338.063	135.7	332.5
338	2	0	338.083	136.4	353
338	2	30	338.104	149.8	386
338	3	0	338.125	150.5	357.5
338	3	30	338.146	165.6	341.5
338	4	0	338.167	170.9	336.5
338	4	30	338.188	167.7	330.5
338	5	0	338.208	163.1	332.5
338	5	30	338.229	161	329.5
338	6	0	338.25	118.1	322.5
338	7	30	338.313	167	333
338	8	0	338.333	169.8	311
338	8	30	338.354	169.8	306
338	12	0	338.5	153.3	360
338	12	30	338.521	157.5	398
338	13	0	338.542	165.6	360
338	13	30	338.563	160.3	354
338	14	0	338.583	167.4	359.5
338	14	30	338.604	152.9	353.5
338	15	0	338.625	152.2	352
338	15	30	338.646	164.2	330.5
338	16	0	338.667	100.1	311.5
338	16	30	338.688	101.2	310.5
338	17	0	338.708	113.3	282.5
338	17	30	338.729	104.8	276
338	18	0	338.75	96.2	247.5
338	18	30	338.771	87	242.5
338	19	0	338.792	94.1	232
338	19	30	338.813	88.7	223.5
338	20	0	338.833	95.9	215.5
338	20	30	338.854	98.7	214.5
338	21	0	338.875	96.2	205.5
338	21	30	338.896	98	199.5
338	22	0	338.917	92.3	196
338	22	30	338.938	96.9	235.5
338	23	0	338.958	91.2	223.5
338	23	30	338.979	93.4	207
339	1	0	339.042	139.7	209.5
339	1	30	339.063	161.4	201.5
339	2	30	339.104	159.3	200.5
339	4	0	339.167	156.8	194
339	4	30	339.188	138.9	194
339	5	0	339.208	144.9	198
339	5	30	339.229	158.2	202
339	6	0	339.25	156.5	199
339	6	30	339.271	156.1	197
339	7	0	339.292	152.9	196
339	7	30	339.313	158.2	203
339	8	0	339.333	152.2	195.5
339	13	30	339.563	140.6	138
339	14	30	339.604	138.5	157
339	15	0	339.625	132.2	161
339	15	30	339.646	130.8	149.5
339	16	0	339.667	147	136.5
339	16	30	339.688	144.5	136.5
339	17	0	339.708	147	128.5
339	17	30	339.729	136.1	126
339	18	0	339.75	147	130.5
339	18	30	339.771	143.1	127
339	19	0	339.792	144.2	132.5
339	19	30	339.813	143.5	122.5
339	20	0	339.833	147	124.5
339	20	30	339.854	135.4	122
339	21	0	339.875	134.3	125
339	21	30	339.896	143.1	122.5
339	22	0	339.917	137.1	127.5
339	22	30	339.938	136.4	125
339	23	0	339.958	135	121
339	23	30	339.979	132.9	125.5
340	0	0	340	138.2	119
340	0	30	340.021	121.7	116
340	1	30	340.063	115	81.5
340	2	0	340.083	114.6	91.5
340	2	30	340.104	113.6	106
340	3	0	340.125	117.1	121.5
340	3	30	340.146	120.6	127.5
340	10	0	340.417	112.5	139.5
340	10	30	340.438	161	146
340	11	0	340.458	151.2	151.5
340	11	30	340.479	141.7	161.5
340	12	30	340.521	126.5	164
340	13	0	340.542	115.5	158
340	13	30	340.563	121.9	149.5
340	14	0	340.583	138.6	164
340	14	30	340.604	87.7	165
340	15	0	340.625	85.2	164.5
340	15	30	340.646	72	185
340	16	0	340.667	72.7	194
340	16	30	340.688	80.2	181.5
340	17	0	340.708	62	160
340	17	30	340.729	65.9	165
340	18	0	340.75	64.9	173.5
340	18	30	340.771	83	123
340	19	0	340.792	104.1	115
340	19	30	340.813	124.4	115
340	20	0	340.833	107.6	112
340	20	30	340.854	94.4	117.5
340	21	0	340.875	81.2	115.5
340	21	30	340.896	70.7	139.5
340	22	0	340.917	77	142.5
340	22	30	340.938	67.2	126
340	23	30	340.979	67.5	213.5
341	0	0	341	129.7	209.5
341	1	0	341.042	158.6	65.5
341	1	30	341.063	157.2	38
341	2	0	341.083	145.9	31.5
341	2	30	341.104	109.7	25
341	3	0	341.125	132.6	81.5
341	3	30	341.146	131.8	116.5
341	4	0	341.167	112.2	122
341	4	30	341.188	75.9	82.5
341	5	0	341.208	79.1	140
341	5	30	341.229	98.4	153
341	6	0	341.25	103.4	144.5
341	6	30	341.271	93.9	143
341	7	0	341.292	110.8	146
341	7	30	341.313	100.9	147
341	8	0	341.333	94.9	140.5
341	8	30	341.354	109.3	147
341	9	0	341.375	123.1	155
341	9	30	341.396	140.3	157
341	10	30	341.438	138.5	159.5
341	11	0	341.458	146.6	164
341	11	30	341.479	134.3	173.5
341	12	0	341.5	107.3	177
341	12	30	341.521	98	173
341	13	0	341.542	92.3	177
341	13	30	341.563	86.6	191
341	14	0	341.583	83	193
341	14	30	341.604	85.2	211
341	15	0	341.625	91.6	210.5
341	15	30	341.646	99.5	198.5
341	16	0	341.667	90.4	195.5
341	16	30	341.688	92	190
341	17	0	341.708	102	193.5
341	17	30	341.729	95.6	204
341	18	0	341.75	85.1	218.5
341	18	30	341.771	86.1	224
341	19	0	341.792	76.6	232.5
341	19	30	341.813	60.5	269.5
341	20	0	341.833	69.3	268
341	20	30	341.854	65	278.5
341	21	30	341.896	79.1	299
341	22	0	341.917	83.8	295
341	22	30	341.938	94.6	293.5
341	23	0	341.958	87.2	288
341	23	30	341.979	81.9	286.5
342	0	0	342	64.7	287.5
342	0	30	342.021	72.8	291.5
342	1	0	342.042	71	285.5
342	1	30	342.063	68.2	278.5
342	2	0	342.083	74.2	275.5
342	2	30	342.104	77	278.5
342	3	0	342.125	71.4	270.5
342	3	30	342.146	79.5	263
342	4	0	342.167	85.1	269.5
342	4	30	342.188	85.8	272
342	5	0	342.208	80.9	266.5
342	5	30	342.229	72.8	257
342	6	0	342.25	71.7	257
342	6	30	342.271	69.6	269.5
342	7	0	342.292	80.5	264.5
342	7	30	342.313	107.6	263.5
342	8	0	342.333	115.7	288.5
342	8	30	342.354	109.7	258.5
342	9	0	342.375	99.2	258.5
342	9	30	342.396	120.6	243
342	10	0	342.417	117.4	231.5
342	10	30	342.438	107.9	224
342	11	0	342.458	110.8	207
342	11	30	342.479	122.4	209
342	12	0	342.5	120.1	213
342	12	30	342.521	118.1	217
342	13	0	342.542	119.9	205
342	13	30	342.563	110.5	199
342	14	0	342.583	115.1	200
342	14	30	342.604	133.6	205.5
342	15	0	342.625	113.6	210.5
342	15	30	342.646	117.4	204.5
342	16	0	342.667	130.1	204
342	16	30	342.688	128.3	209
342	17	0	342.708	137.5	212
342	17	30	342.729	121.7	203
342	18	0	342.75	119	202
342	18	30	342.771	99.8	204
342	19	30	342.813	113.6	199.5
342	20	0	342.833	122.4	190
342	20	30	342.854	119.8	179
342	21	0	342.875	141.7	180.5
342	21	30	342.896	147	184
342	22	0	342.917	124.4	171
342	22	30	342.938	109.4	172
342	23	0	342.958	130.8	170
342	23	30	342.979	148.7	162.5
343	2	0	343.083	151.2	136.5
343	2	30	343.104	125.5	144.5
343	3	0	343.125	141.3	143
343	6	30	343.271	154	132.5
343	7	0	343.292	140.6	125
343	7	30	343.313	155.8	134.5
343	8	0	343.333	146.3	143
343	8	30	343.354	112.2	139.5
343	9	0	343.375	134	152
343	9	30	343.396	142.4	149
343	10	0	343.417	155.4	120
343	10	30	343.438	146.6	122
343	11	0	343.458	163.8	128
343	11	30	343.479	135.4	111.5
343	12	0	343.5	124.5	119
343	14	0	343.583	158.9	112
343	14	30	343.604	163.8	112
343	15	0	343.625	131.1	119
343	15	30	343.646	117.1	143
343	16	0	343.667	126.9	140
343	16	30	343.688	124.5	137.5
343	17	30	343.729	85.5	168
343	18	0	343.75	83	167
343	18	30	343.771	62.2	155.5
343	19	0	343.792	64.3	157
343	19	30	343.813	78.1	162.5
343	20	0	343.833	65.7	157
343	20	30	343.854	49.2	159.5
343	21	0	343.875	48.5	149
343	21	30	343.896	54.8	159.5
343	22	0	343.917	72.1	167
343	22	30	343.938	62.2	156
343	23	30	343.979	64.3	143
344	0	0	344	117.8	171
344	1	0	344.042	138.9	130
344	1	30	344.063	138.2	134.5
344	2	0	344.083	150.5	141
344	2	30	344.104	143.5	126.5
344	3	0	344.125	137.5	118
344	3	30	344.146	149.4	118.5
344	4	30	344.188	166.7	99.5
344	5	0	344.208	151.5	108
344	5	30	344.229	152.6	102.5
344	6	0	344.25	165.3	92
344	6	30	344.271	141.3	71.5
344	7	0	344.292	139.6	77
344	7	30	344.313	166	84
344	8	0	344.333	153.3	82
344	8	30	344.354	129.4	91
344	9	0	344.375	115.7	90
344	15	30	344.646	150.5	68.5
344	16	0	344.667	147	65
344	16	30	344.688	129	69
344	17	0	344.708	117.4	69
344	22	0	344.917	106.5	34
344	22	30	344.938	109	37
344	23	0	344.958	128	56
344	23	30	344.979	122.4	42
345	0	0	345	117.1	58
345	0	30	345.021	108.6	75.5
345	1	0	345.042	110.8	84
345	2	30	345.104	144.9	57
345	3	0	345.125	154	53
345	3	30	345.146	109.3	59.5
345	4	0	345.167	159.6	70
345	11	0	345.458	160	64
345	11	30	345.479	158.9	65.5
345	12	0	345.5	157.5	63
345	12	30	345.521	158.9	58.5
346	10	30	346.438	21.8	112.5
346	11	0	346.458	22.5	173
346	11	30	346.479	30	163
346	12	0	346.5	20	173
346	12	30	346.521	26.7	198.5
346	13	0	346.542	20	291
346	13	30	346.563	18	284
346	14	0	346.583	20.7	328
346	14	30	346.604	22.5	338.5
346	15	0	346.625	25	303
346	15	30	346.646	20	303
346	16	0	346.667	21	334
346	16	30	346.688	25	138.5
346	17	0	346.708	27.8	147
346	17	30	346.729	30	148
346	18	0	346.75	42.4	145
346	18	30	346.771	116.7	116
346	19	0	346.792	136.1	23
346	19	30	346.813	152.9	18.5
346	20	0	346.833	138.9	15
346	20	30	346.854	132.6	16.5
346	21	0	346.875	140.3	17
346	21	30	346.896	40	22.5
346	22	0	346.917	30.2	50
346	22	30	346.938	26	134
346	23	30	346.979	30.2	173.5
347	0	0	347	28.5	179
347	0	30	347.021	27.4	165.5
347	1	0	347.042	32.3	132
347	1	30	347.063	44	113.5
347	2	0	347.083	71.4	101
347	2	30	347.104	80.5	90.5
347	3	0	347.125	77.7	88
347	3	30	347.146	98.8	75
347	4	0	347.167	107.2	78
347	4	30	347.188	113.2	81
347	5	0	347.208	102	82
347	5	30	347.229	110.8	80.5
347	6	0	347.25	100.2	76
347	6	30	347.271	82.6	80
347	7	0	347.292	79.8	88
347	7	30	347.313	64.3	92
347	8	0	347.333	67.5	100
347	8	30	347.354	59.4	101
347	9	0	347.375	92.3	101
347	9	30	347.396	97.7	110
347	10	30	347.438	92.7	126.5
347	11	0	347.458	109.4	138
347	11	30	347.479	93.7	121.5
347	12	0	347.5	60.8	118
347	12	30	347.521	74.5	122
347	13	0	347.542	80.9	122
347	13	30	347.563	134.4	118
347	14	0	347.583	114	114
347	14	30	347.604	150.1	109.5
347	15	0	347.625	150.1	102
347	15	30	347.646	152.9	101.5
347	16	0	347.667	143.5	98
347	16	30	347.688	148	92
347	17	0	347.708	150.1	89
347	17	30	347.729	145.2	89
347	18	0	347.75	130.8	87
348	0	0	348	138.2	75
348	0	30	348.021	141.3	74
348	1	0	348.042	145.2	75
348	1	30	348.063	152.2	74
348	2	0	348.083	140.6	73
348	2	30	348.104	139.9	75
348	3	0	348.125	129.4	73
348	5	30	348.229	118.8	66
348	6	30	348.271	108.3	61
348	7	0	348.292	125.2	66
348	7	30	348.313	151.2	64.5
348	8	0	348.333	152.6	60
348	8	30	348.354	138.2	58.5
348	9	0	348.375	129.4	61
348	9	30	348.396	133.3	63.5
348	10	0	348.417	128	66
348	10	30	348.438	121	66.5
348	11	0	348.458	128	66
348	11	30	348.479	133.3	70.5
348	12	0	348.5	137.1	60
348	12	30	348.521	132.9	64.5
348	13	0	348.542	128.7	65
348	13	30	348.563	132.2	64.5
348	14	0	348.583	136.1	70
348	14	30	348.604	120.6	64
348	15	0	348.625	155.4	70
348	15	30	348.646	147	74.5
348	16	0	348.667	156.5	76
348	16	30	348.688	147.3	89
348	17	0	348.708	143.8	85
348	17	30	348.729	147.3	85.5
348	18	0	348.75	133.6	86
348	18	30	348.771	143.8	86.5
348	19	0	348.792	150.5	86
348	19	30	348.813	113.9	93
348	20	30	348.854	111.8	95
348	21	0	348.875	142.4	95
348	21	30	348.896	141.7	98.5
348	22	0	348.917	115	97
348	22	30	348.938	131.1	94.5
348	23	0	348.958	124.5	89
348	23	30	348.979	119.9	86.5
349	0	0	349	132.2	85
349	0	30	349.021	116.4	90
349	1	0	349.042	120.2	92
352	11	30	352.479	41.7	77
352	12	0	352.5	43.5	70
352	12	30	352.521	43.2	72
352	13	0	352.542	47.8	77.5
352	13	30	352.563	148.7	74
352	14	0	352.583	147.7	60.5
352	15	0	352.625	155.8	59
352	16	0	352.667	137.5	66
352	17	30	352.729	162.4	85
353	4	0	353.167	165.6	78
353	4	30	353.188	156.1	76
354	4	0	354.167	76.6	88
354	4	30	354.188	89.7	62
354	5	30	354.229	134	51
354	8	30	354.354	155.4	22.5
354	11	30	354.479	137.5	19.5
354	12	30	354.521	115.3	19.5
354	13	30	354.563	107.6	27.5
354	14	30	354.604	129.7	53
354	15	30	354.646	140.6	28
354	16	30	354.688	129.4	36.5
354	17	30	354.729	158.2	51.5
354	18	30	354.771	38.7	75.5
354	19	30	354.813	42.9	126
354	20	30	354.854	34.1	171
354	21	30	354.896	22.5	227
354	22	30	354.938	26	228
354	23	30	354.979	22.5	243
355	3	0	355.125	22.9	316
355	3	30	355.146	25.7	323
355	4	0	355.167	26	270
355	4	30	355.188	21.8	192
355	9	0	355.375	24.3	139.5
355	9	30	355.396	22.9	133.5
355	10	30	355.438	21.1	251.5
355	11	30	355.479	23.9	305.5
355	12	30	355.521	19	329
355	13	30	355.563	32.7	327.5
355	14	30	355.604	34.1	348
355	15	30	355.646	30.6	359
355	16	30	355.688	37.3	366
355	17	30	355.729	38.3	349.5
355	18	30	355.771	25.7	359
355	19	30	355.813	23.9	366
355	20	30	355.854	33.4	354
355	21	30	355.896	25.3	325.5
355	22	30	355.938	29.2	335
355	23	30	355.979	30.2	353
356	0	30	356.021	29.2	361
356	4	30	356.188	32.3	304.5
356	5	0	356.208	29.9	343.5
356	5	30	356.229	30.6	342.5
356	6	0	356.25	23.9	350
356	6	30	356.271	23.2	372.5
356	7	0	356.292	25.7	387
356	7	30	356.313	24.6	378
356	8	0	356.333	25	395.5
356	8	30	356.354	26	385
356	9	0	356.375	27.4	381.5
356	9	30	356.396	29.2	388
356	10	0	356.417	29.2	406.5
356	10	30	356.438	29.9	429
356	11	0	356.458	29.5	462
356	11	30	356.479	22.5	497
356	12	0	356.5	24.6	496
356	12	30	356.521	23.6	481.5
356	13	0	356.542	22.5	485.5
356	13	30	356.563	21.8	496
356	14	0	356.583	22.5	517.5
356	14	30	356.604	19	548
356	15	0	356.625	22.5	584
356	15	30	356.646	22.5	580.5
356	16	0	356.667	22.5	598.5
356	16	30	356.688	22.9	578
356	17	0	356.708	20.7	589
356	17	30	356.729	22.5	598.5
356	18	0	356.75	20.7	630
356	18	30	356.771	21.1	608
356	19	0	356.792	20	581.5
356	19	30	356.813	19	587
356	20	0	356.833	19	609.5
356	20	30	356.854	19.3	581
356	21	0	356.875	19	612
356	21	30	356.896	19	580.5
356	22	30	356.938	20.4	575.5
356	23	0	356.958	21.1	594
356	23	30	356.979	19	574
357	0	0	357	20.4	556
357	0	30	357.021	20	577
357	1	0	357.042	19.3	539
357	2	0	357.083	22.5	731
357	2	30	357.104	25.7	614
357	4	0	357.167	23.9	468
357	4	30	357.188	26.7	382
357	5	30	357.229	31.6	366
357	6	0	357.25	28.5	369
357	6	30	357.271	33.8	347
357	7	0	357.292	36.9	452
357	7	30	357.313	30.2	449.5
357	8	0	357.333	23.2	399
357	8	30	357.354	31.3	394
357	9	0	357.375	32.7	419
357	9	30	357.396	30.2	406
357	11	30	357.479	30	366.5
357	12	0	357.5	25.7	376
357	12	30	357.521	23.9	343
357	13	0	357.542	28.8	339
357	13	30	357.563	32.3	327.5
357	14	0	357.583	25.7	329
357	14	30	357.604	21.1	288.5
357	15	0	357.625	28.1	295
357	15	30	357.646	33.8	314.5
357	16	0	357.667	39.7	331
357	16	30	357.688	41.1	326
357	17	0	357.708	32	307
357	17	30	357.729	33.1	305
357	18	0	357.75	33.8	324
357	18	30	357.771	45.4	306
357	19	0	357.792	33.8	323
357	19	30	357.813	30.2	354.5
357	20	0	357.833	30.9	376
357	20	30	357.854	34.1	384
357	21	0	357.875	33.4	379
357	21	30	357.896	32	318.5
357	22	0	357.917	34.8	320
357	22	30	357.938	33.1	291
357	23	0	357.958	34.5	292
357	23	30	357.979	25	294
358	0	30	358.021	30	320
358	1	0	358.042	25	340.5
358	2	0	358.083	23.9	325.5
358	3	0	358.125	28.5	350.5
358	4	0	358.167	31.6	350
358	5	0	358.208	39.7	391.5
358	6	0	358.25	23	393.5
358	7	0	358.292	25.3	398.5
358	8	0	358.333	27.8	405
358	9	0	358.375	28.8	414
358	10	0	358.417	23.2	374
358	10	30	358.438	24.3	322.5
358	11	30	358.479	24.3	370.5
358	12	30	358.521	27.1	452
358	13	30	358.563	23.2	330.5
358	14	30	358.604	24.6	401.5
358	15	30	358.646	22.5	231
358	16	30	358.688	22.2	228.5
358	17	30	358.729	24.3	198
358	18	30	358.771	30.2	189.5
358	19	30	358.813	30.2	211.5
358	21	0	358.875	22.2	204
358	21	30	358.896	25.7	205
358	22	0	358.917	25.3	209
358	22	30	358.938	23.6	196
358	23	0	358.958	26.4	203
358	23	30	358.979	25	200.5
359	0	0	359	30.9	189
359	0	30	359.021	68.6	191
359	1	0	359.042	66.5	178
359	1	30	359.063	69.3	174.5
359	2	0	359.083	76.6	170
359	2	30	359.104	80.5	166
359	3	0	359.125	91.4	158
359	3	30	359.146	85.1	146
359	4	0	359.167	93.5	133
359	4	30	359.188	102	143.5
359	6	0	359.25	114.8	127.5
359	6	30	359.271	102.6	120
359	7	0	359.292	107.3	108.5
359	7	30	359.313	100.5	105
359	8	0	359.333	124	98
359	8	30	359.354	159.3	102.5
359	9	0	359.375	168.4	98
359	21	30	359.896	141.7	69.5
359	22	0	359.917	139.2	56
359	22	30	359.938	137.5	66
359	23	30	359.979	147.3	77.5
360	0	0	360	152.6	80
360	0	30	360.021	156.1	86.5
360	1	0	360.042	164.2	89
360	1	30	360.063	165.3	92.5
360	2	0	360.083	159.6	97
360	2	30	360.104	160.3	98
360	3	0	360.125	149.4	97
360	3	30	360.146	158.6	104.5
360	4	0	360.167	148.7	102
360	4	30	360.188	144.2	91.5
360	5	0	360.208	154.4	104
360	5	30	360.229	152.6	111.5
360	6	0	360.25	145.2	112.5
360	7	0	360.292	107.9	122
360	23	30	360.979	125.5	36
361	0	0	361	126.6	35
361	0	30	361.021	156.5	38
